1  
2  
3  
4  
5  
6  
7  
8  
9  
10  
11  
12  
13  
14  
15  
16  
17  
18  
19  
20  
21  
22  
23  
24  
25  
26  
27  
28  
29  
30  
31  
32

## HIPK4 is essential for murine spermiogenesis

J. Aaron Crapster,<sup>a\*</sup> Paul G. Rack,<sup>a</sup> Zane J. Hellmann,<sup>a</sup> Joshua E. Elias,<sup>b</sup> John J. Perrino,<sup>c</sup>  
Barry Behr,<sup>d</sup> Yanfeng Li,<sup>e</sup> Jennifer Lin,<sup>e</sup> Hong Zeng,<sup>e</sup> and James K. Chen<sup>a,f\*</sup>

<sup>a</sup> Department of Chemical and Systems Biology, Stanford University School of Medicine, Stanford, CA

<sup>b</sup> Chan Zuckerberg Biohub, Stanford University, Stanford, CA

<sup>c</sup> Cell Science Imaging Facility, Stanford University School of Medicine, Stanford, CA

<sup>d</sup> Department of Obstetrics and Gynecology, Reproductive Endocrinology and Infertility, Stanford University School of Medicine, Stanford, CA

<sup>e</sup> Transgenic, Knockout, and Tumor Model Center, Stanford University School of Medicine, Stanford, CA

<sup>f</sup> Department of Developmental Biology, Stanford University School of Medicine, Stanford, CA

\* Correspondence should be addressed to J.A.C. ([aaron.crapster@vibliome.com](mailto:aaron.crapster@vibliome.com)) or J.K.C. ([jameschen@stanford.edu](mailto:jameschen@stanford.edu))

33 **ABSTRACT**

34 Mammalian spermiogenesis is a remarkable cellular transformation, during which round  
35 spermatids elongate into chromatin-condensed spermatozoa. The signaling pathways that  
36 coordinate this process are not well understood, and we demonstrate here that homeodomain-  
37 interacting protein kinase 4 (HIPK4) is essential for spermiogenesis and male fertility in mice.  
38 HIPK4 is predominantly expressed in round and early elongating spermatids, and *Hipk4* knockout  
39 males are sterile, exhibiting phenotypes consistent with oligoasthenoteratozoospermia. *Hipk4*  
40 mutant sperm have reduced oocyte binding and are incompetent for *in vitro* fertilization, but they  
41 can still produce viable offspring via intracytoplasmic sperm injection. Ultrastructural analyses of  
42 HIPK4-null male germ cells reveal defects in the filamentous actin (F-actin)-scaffolded  
43 acroplaxome during spermatid elongation and abnormal head morphologies in mature  
44 spermatozoa. We further observe that HIPK4 overexpression induces branched F-actin structures  
45 in cultured fibroblasts, supporting a role for this kinase in cytoskeleton remodeling. Our findings  
46 establish HIPK4 as an essential regulator of sperm head shaping and potential target for male  
47 contraception.

48

## 49 INTRODUCTION

50 Spermiogenesis is a critical, post-meiotic phase of male gametogenesis defined by the  
51 differentiation of spermatids into spermatozoa (Figure 1A-B) (*Russell, et al., 1990*). This dramatic  
52 morphological transformation is mediated by a series of cytological processes that are unique to  
53 the testis (*Kierszenbaum, et al., 2007; O'Donnell, 2014*). In round spermatids, Golgi-derived  
54 vesicles give rise to the acrosome (*Berruti, et al., 2011*), a cap-like structure that is anchored to  
55 the anterior nuclear membrane by a filamentous actin (F-actin)- and keratin-containing plate  
56 called the acroplaxome (*Kierszenbaum, et al., 2003; Kierszenbaum, et al., 2004*). Neighboring  
57 Sertoli cells form an apical specialization that circumscribes each spermatid head, and F-actin  
58 hoops within these anchoring junctions apply external forces to the acrosome-acroplaxome  
59 complex and underlying spermatid nucleus (*Wong, et al., 2008*). The posterior nuclear pole in  
60 spermatids is simultaneously girdled by a transient microtubule- and F-actin-scaffolded structure  
61 called the manchette, which extends from the basal body of the developing flagellum and is  
62 separated from the acrosome-acroplaxome complex by a narrow groove (*Lehti, et al., 2016*).

63 As spermiogenesis proceeds, these membranous and cytoskeletal structures act in concert  
64 to elongate the spermatid head. The spermatid nucleus becomes highly compact as chromatin  
65 condenses into a quiescent state (*Rathke, et al., 2014*), and cytoplasmic contents of the germ cell  
66 are also expelled through residual bodies or intercellular bridges to Sertoli cells (*Sprando, et al.,*  
67 *1987; Zheng, et al., 2007*). The acrosome-acroplaxome complex and manchette concurrently  
68 mediate protein transport from the Golgi to the developing flagellum, delivering cargoes required  
69 for flagellum assembly and function (*Kierszenbaum, et al., 2011; Kierszenbaum, et al., 2004*). In  
70 mature sperm, the acrosome then promotes sperm-egg fusion through the exocytotic release of  
71 digestive enzymes and the display of oocyte-binding receptors that are localized to the inner  
72 acrosomal membrane (*Stival, et al., 2016*).

73 In contrast to these detailed cytological descriptions, our understanding of the molecular  
74 mechanisms that coordinate spermiogenesis is still nascent. Initial insights into this process have

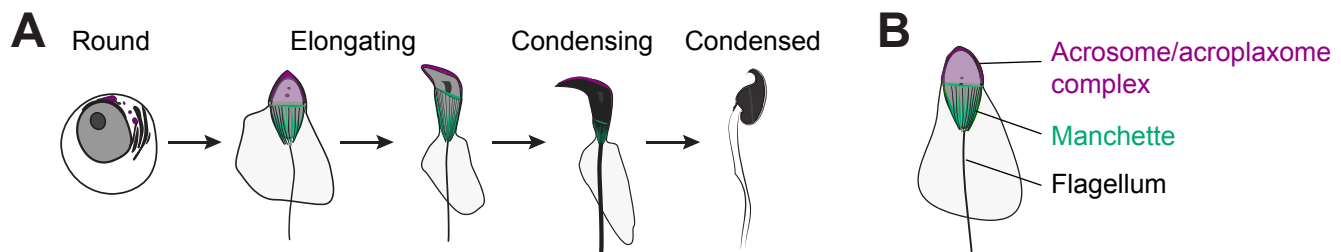

**Figure 1. Key steps of spermiogenesis.** (A) Schematic representation of murine male germ cells transitioning from round spermatids to condensed spermatozoa. These steps occur within the testis seminiferous epithelium and are conserved in all mammals. (B) Illustration of an elongating spermatid highlighting structural features that are established during spermiogenesis.



75 been provided by mouse mutants with spermatogenic and male fertility defects (*de Boer, et al.,*  
76 *2015; Yan, 2009*). For example, pro-acrosomal vesicles fail to fuse in mice that lack the  
77 nucleoporin-like protein HRB/AGFG1 (*Kang-Decker, et al., 2001; Kierszenbaum, et al., 2004*),  
78 nuclear membrane protein DPY19L2 (*Pierre, et al., 2012*), certain Golgi-associated proteins  
79 [GOPC (*Yao, et al., 2002*), PICK1 (*Xiao, et al., 2009*), and GM130 (*Han, et al., 2017*)], or  
80 acrosomal factors [SPACA1 (*Fujihara, et al., 2012*) and SPATA16 (*Fujihara, et al., 2017*)]. These  
81 mutants consequently produce acrosome-less sperm with rounded heads—defects that are  
82 characteristic of globozoospermia. Acrosome biogenesis also requires the matrix component  
83 ACRBP (*Kanemori, et al., 2016*) and the coiled coil protein CCDC62 (*Li, Y., et al., 2017; Pasek,*  
84 *et al., 2016*), and loss of either acrosomal protein can cause phenotypes resembling  
85 oligoasthenoteratozoospermia (OAT), a fertility disorder characterized by low sperm  
86 concentrations and spermatozoa with abnormal shapes and reduced motility (*Tuttelmann, et al.,*  
87 *2018*).

88 Murine models have similarly revealed proteins that are required for manchette and  
89 flagellum assembly, including the RIMBP3-HOOK1 (*Zhou, et al., 2009*), LRGUK1-HOOK2 (*Liu,*  
90 *et al., 2015*), MEIG1-PACRG-SPAG16L (*Li, W., et al., 2015*), and FU (*Nozawa, et al., 2014*).  
91 Manchette shaping and degradation are also essential for sperm development, as demonstrated  
92 by the OAT-like phenotypes of mice expressing a loss-of-function variant of the microtubule-  
93 severing protein Katanin p80 (*O'Donnell, et al., 2012*). As spermiogenesis proceeds,  
94 membranous and cytoskeletal structures are dynamically coupled by distinct LINC (Linker of  
95 Nucleoskeleton and Cytoskeleton) complexes. These include LINC components that reside in the  
96 outer acrosomal membrane (SUN1 and nesprin3) (*Gob, et al., 2010*) or posterior nuclear  
97 envelope (SUN3, SUN4, SUN5, and nesprin1) (*Gob, et al., 2010; Pasch, et al., 2015; Shang, Y.,*  
98 *et al., 2017*). For example, loss of SUN4 function in mice causes manchette disorganization,  
99 sperm head defects, and male sterility.

100 Factors that specifically contribute to acroplaxome function have been more difficult to  
101 identify and study. Actin-binding proteins such as myosins Va and VI, profilins III and IV, and  
102 cortactin localize to the acroplaxome and have been implicated in its regulation (*Behnen, et al.,*  
103 *2009; Kierszenbaum, et al., 2003; Kierszenbaum, et al., 2008; Kierszenbaum, et al., 2011;*  
104 *Zakrzewski, et al., 2017*); however, their wide-spread expression in somatic tissues has hindered  
105 functional studies. One notable exception is the actin capping protein, CAPZA3, a spermatid-  
106 specific factor that associates with CAPZB3 and binds to the barbed ends of F-actin. *Capza3*  
107 mutant male mice are sterile and have OAT-like defects, indicating that F-actin dynamics within  
108 the acroplaxome play an important role in spermiogenesis (*Geyer, et al., 2009*).

109 Upstream signaling proteins that control cytoskeletal dynamics are likely to be critical drivers  
110 of spermatid differentiation. For instance, PLC $\gamma$ -1 phosphorylation is dysregulated in the germ  
111 cells of KIT<sup>D814Y</sup> mutant mice, leading to mislocalized manchettes and deformed spermatid heads  
112 (*Schnabel, et al., 2005*). Phosphoproteomic analyses indicate that several kinase-dependent  
113 pathways are active throughout sperm development, but the roles of specific kinases in  
114 spermiogenesis are not well understood (*Castillo, et al., 2019*). Here we describe an essential  
115 function for homeodomain-interacting protein kinase 4 (HIPK4) in murine spermiogenesis and  
116 fertility. This dual-specificity kinase is predominantly expressed in the testis, where it is restricted  
117 to round and early elongating spermatids. Male *Hipk4* knockout mice are sterile and exhibit  
118 spermatogenic defects characteristic of OAT. Sperm produced by these mutant mice are also  
119 incompetent for oocyte binding and *in vitro* fertilization, and they exhibit head defects associated  
120 with dysregulation of the acrosome-acroplaxome complex. Consistent with these observations,  
121 HIPK4 overexpression in cultured somatic cells remodels the F-actin cytoskeleton and alters the  
122 phosphorylation state of multiple actin-interacting proteins. Taken together, our studies  
123 demonstrate that HIPK4 regulates acrosome-acroplaxome dynamics, spermatid head shaping,  
124 and ultimately, sperm function.

125

## 126 RESULTS

### 127 *HIPK4 is expressed in differentiating spermatids*

128 Gene expression data available through the Genotype Tissue Expression Project  
129 (<https://www.gtexportal.org>) and the Mammalian Reproductive Genetics Database  
130 (<http://mrgd.org>) indicate that HIPK4 is largely expressed in the testis, with lower levels detected  
131 in the brain. Using a tissue cDNA array and quantitative PCR, we also found that *Hipk4* is robustly  
132 transcribed in the adult murine testis (Figure 2A). *In situ* hybridization of testis sections obtained  
133 from 8-week-old C57BL/6NJ mice revealed that *Hipk4* is transcribed specifically in round and  
134 early elongating spermatids (Figure 2B), and we observed comparable *HIPK4* expression  
135 patterns in adult human testis samples (Figure 2C). We then assayed testis sections from juvenile  
136 male mice of different ages to determine precisely when *Hipk4* is expressed during  
137 spermatogenesis, taking advantage of the initial, synchronized wave of male germ cell  
138 development. *Hipk4* transcripts were first detected in germ cells at 21 days postpartum (dpp),  
139 coinciding with the appearance of step 2-3 round spermatids (Figure 2 – figure supplement 1).  
140 The population of *Hipk4*-positive spermatids expanded until 29 dpp, at which point *Hipk4* mRNA  
141 became undetectable in elongating spermatids circumscribing the seminiferous lumen. These  
142 results suggest that HIPK4 specifically functions within male germ cells as they transition from  
143 round to elongating spermatids.

144

### 145 *HIPK4 is essential for male fertility*

146 *Hipk4* knockout mice were first reported in a 2008 patent application by Bayer Schering  
147 Pharma, which described general defects in sperm morphology and number (Sacher, *et al.*,  
148 2008). However, the fertility of these mutant mice was not characterized, nor were the mice made  
149 publicly available. As part of the Knockout Mouse Phenotyping Program (KOMP<sup>2</sup>), the Jackson  
150 Laboratory generated mice containing a *Hipk4* null allele (*tm1b*), in which a  $\beta$ -galactosidase  
151 reporter replaces exons 2 and 3. We established a colony of *Hipk4*<sup>tm1b/tm1b</sup> mice (henceforth

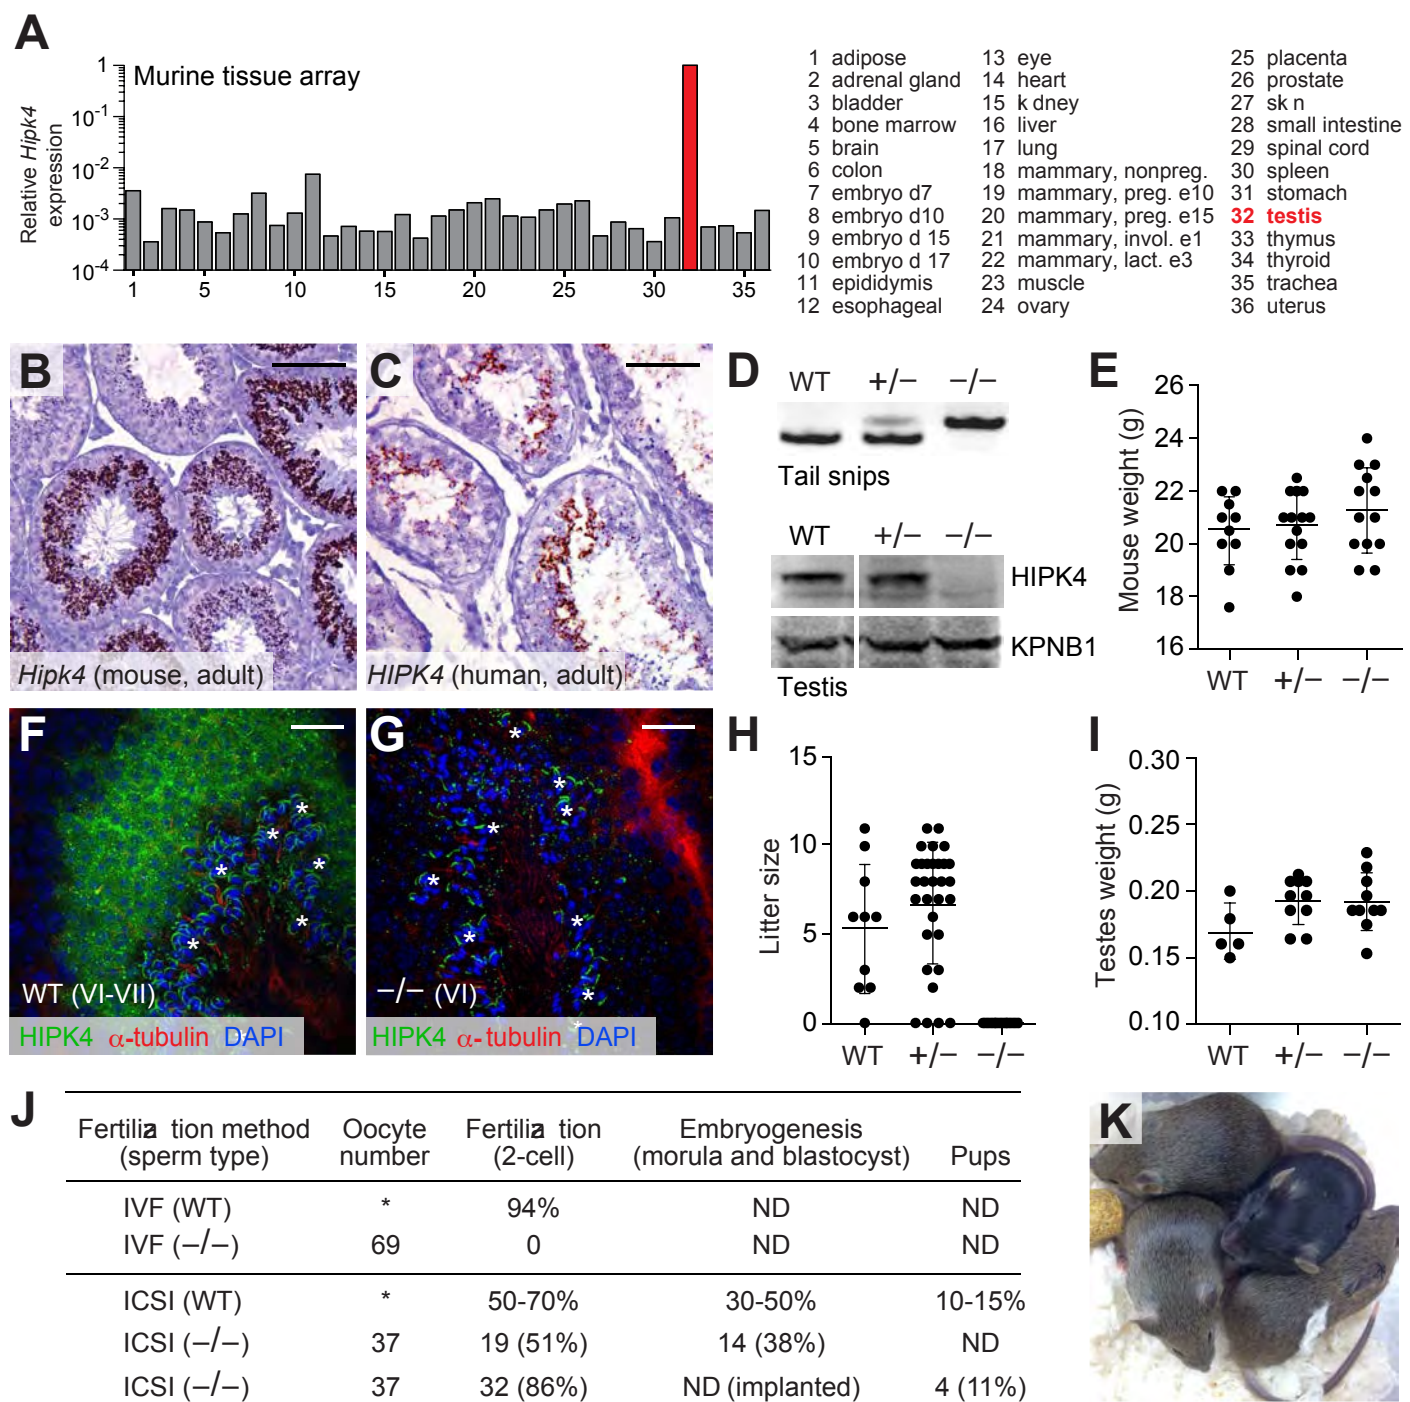

**Figure 2. HIPK4 is expressed in spermatids and required for male fertility in mice.** (A) *Hipk4* expression in various murine tissues as determined by qPCR analysis of the Origene TissueScan™ Mouse Normal cDNA array. Data are normalized to *Gapdh*. (B-C) *Hipk4* expression in adult mouse (B) and human (C) testis sections as determined by *in situ* hybridization. (D) Validation of *Hipk4* knock out by PCR of tail-derived genomic DNA and western blot analyses of whole testis lysates. Immunoblots are from the same membrane and exposure time. (E) Weights of WT, *Hipk4*<sup>+/-</sup>, and *Hipk4*<sup>-/-</sup> males at 6-7 weeks of age. (F-G) HIPK4 protein expression in adult mouse seminiferous tubule sections (Stage VI-VII) as determined by immunofluorescence imaging. Asterisks indicate non-specific antibody binding (see Figure 2 – figure supplement 2). (H) Number of live pups per litter resulting from crosses between 7-week old males and age-matched, WT females. (I) WT, *Hipk4*<sup>+/-</sup>, and *Hipk4*<sup>-/-</sup> testis weights at 6 weeks of age. (J) Fertilization potential of *Hipk4*<sup>-/-</sup> sperm using IVF and ICSI. ND = not determined. Experiments were conducted by the Stanford Transgenic, Knock out, and Tumor Model Center, and the wild-type data represents the core facility's average results using C57BL/6NJ sperm. (K) Pups born via ICSI using *Hipk4*<sup>-/-</sup> sperm. Scale bars: B-C, 100  $\mu$ m; F-G, 20  $\mu$ m. Statistical analyses: error bars depicted in panels E, H, and I represent the average value  $\pm$  s.d.

152 referred to as *Hipk4*<sup>-/-</sup>) and confirmed that these mice fail to produce functional *Hipk4* gene  
153 products using *in situ* hybridization and western blot analysis (Figure 2D). Loss of HIPK4 had no  
154 apparent effect on the animal viability or growth (Figure 2E). By immunostaining testis  
155 cryosections from adult wild-type and *Hipk4*<sup>-/-</sup> mice, we confirmed that HIPK4 protein is expressed  
156 in round and early elongating spermatids (steps 3-8). The kinase is distributed throughout the  
157 cytoplasm of these germ cells, mirroring its subcellular localization when overexpressed in  
158 somatic cells (Figure 2F-G, Figure 2 – figure supplement 2) (*van der Laden, et al., 2015*).

159 Despite their grossly normal development and physiology, homozygous *Hipk4* mutant males  
160 were unable to conceive, whereas heterozygote males sired normal litter sizes (Figure 1H-I). No  
161 significant differences in testis weight were observed across the *Hipk4* genotypes (Figure 1J).  
162 Female *Hipk4*<sup>-/-</sup> mice were physically indistinguishable from their wild-type and heterozygous  
163 littermates and gave birth to normal litter sizes (data not shown). Epididymal sperm isolated from  
164 *Hipk4*<sup>-/-</sup> mice failed to fertilize wild-type oocytes under standard *in vitro* fertilization (IVF)  
165 conditions, but intracytoplasmic sperm injection (ICSI) of the mutant sperm yielded embryos that  
166 could undergo uterine implantation to produce healthy pups (Figure 2J-K).

167

#### 168 *HIPK4-deficient mice exhibit OAT-like phenotypes*

169 During our *in vitro* fertilization studies, it was apparent that the *Hipk4*<sup>-/-</sup> male mice had  
170 spermatogenesis defects consistent with OAT. In comparison to wild-type mice, homozygous  
171 mutants produced sperm at low epididymal concentrations, and the germ cells had decreased  
172 motility [both the total number of motile sperm and those with progressive motility as measured  
173 by computer-assisted sperm analysis (CASA)] and abnormal morphology (Figure 3A-E, Figure 3  
174 – figure supplement 1). Head defects included macrocephaly, microcephaly, and irregular shapes;  
175 tail deformities included bent, coiled, crinkled, and shortened flagella. *Hipk4*<sup>+/-</sup> sperm also had  
176 reduced epididymal concentrations and total motility, but their progressive motility and  
177 morphology were normal. We observed that over 10% of the epididymal sperm isolated from



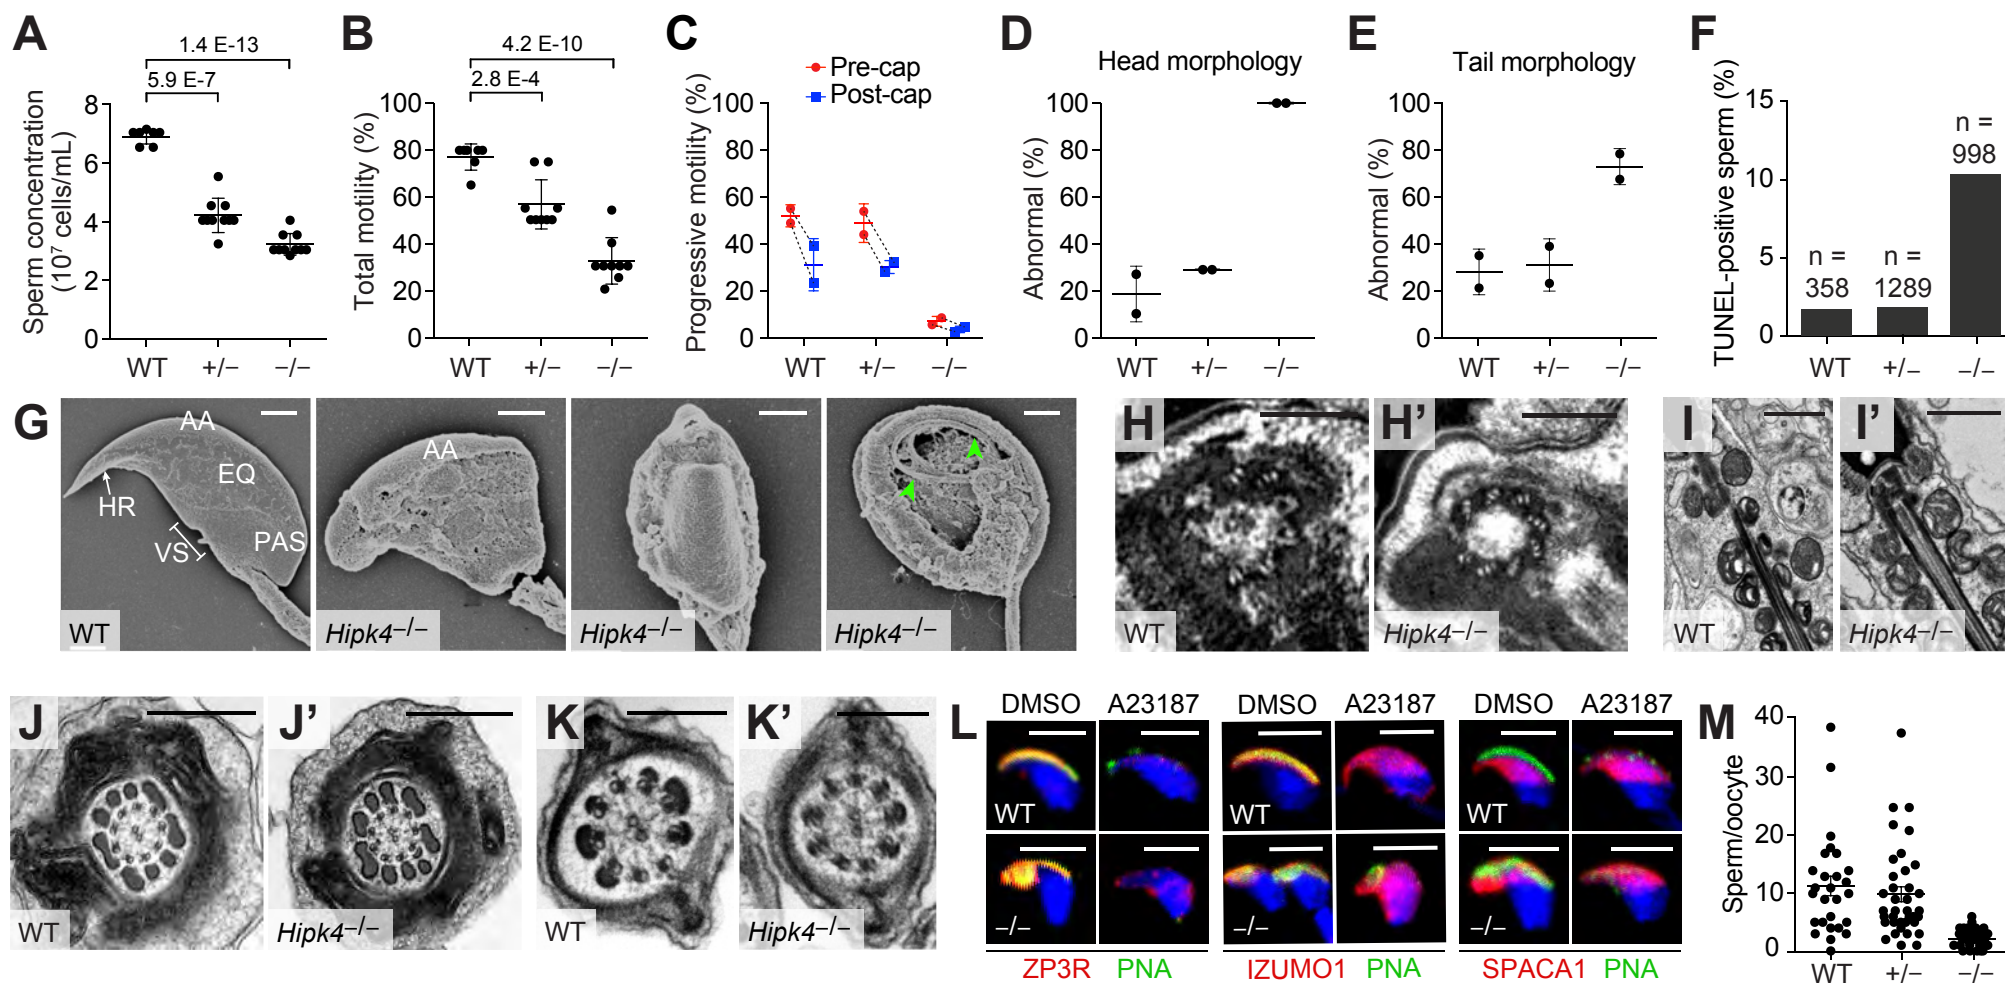

**Figure 3. *Hipk4* knockout mice exhibit oligoasthenoteratozoospermia.** (A) Concentrations of epididymal sperm  $\pm$  s.d. *P* values for the indicated statistical comparison are shown. (B) Percentage of epididymal sperm that were motile  $\pm$  s.d. *P* values for the indicated statistical comparison are shown. (C) CASA measurements of progressive sperm motility before and after capacitation  $\pm$  s.d. Data connected by the dashed lines are showing sperm motility from the same animal. (D, E) Percentage of sperm morphology with abnormal head or tail morphology  $\pm$  s.d. as assessed by phase contrast microscopy (see also, Figure 3 – Figure supplement 1). (F) Quantification of TUNEL-positive epididymal sperm with the designated genotypes (n = total number of sperm analyzed). (G) SEM images of epididymal sperm. AA = anterior acrosome, EQ = equatorial segment, PAS = postacrosomal segment, VS = ventral spur, HR = hook rim. Arrowheads point to the axoneme wrapped inside a demembrated sperm head. (H, H') Centrioles at the basal body of step 15 spermatid axonemes. (I, I') Mitochondria along the midpiece of step 15 spermatids. (J, J') Cross section of step 15 spermatid flagella at the midpiece. (K, K') Cross section of step 15 spermatid flagella at their principal piece. (L) Acrosomal changes in capacitated sperm treated with a  $\text{Ca}^{2+}$  ionophore (A23187) as assessed by immunofluorescence and staining with FITC-labeled PNA. Nuclei were stained with DAPI. (M) Number of oocyte-bound sperm under standard IVF conditions after extensive washing  $\pm$  s.e.m. Scale bars: G, 2  $\mu\text{m}$ ; H, 1  $\mu\text{m}$ ; I, 1  $\mu\text{m}$ ; J, 0.5  $\mu\text{m}$ ; K, 0.2  $\mu\text{m}$ ; L, 5  $\mu\text{m}$ .

178 *Hipk4*<sup>-/-</sup> mice exhibited DNA fragmentation that could be detected by TUNEL (terminal  
179 deoxynucleotidyl transferase dUTP nick end labeling) staining. In comparison, only 1.5% of wild-  
180 type or *Hipk4*<sup>+/-</sup> sperm were TUNEL-positive. Homozygous mutant sperm therefore may undergo  
181 a higher rate of apoptosis, possibly accounting for their lower epididymal concentrations.

182 We further compared the head structures of wild-type and *Hipk4*<sup>-/-</sup> sperm by scanning  
183 electron microscopy (SEM; Figure 3G). All HIPK4-deficient sperm exhibited head morphologies  
184 that deviated from the flat, crescent-shaped structures of their wild-type counterparts. Specific  
185 defects included a disorganized anterior acrosome and the absence of a distinct equatorial  
186 segment, post-acrosomal sheath, ventral spur, and sharp hook rim. In some sperm samples with  
187 demembrated head structures, we observed mislocalized axonemal components wrapped  
188 around the nucleus. We also used transmission electron microscopy (TEM) to analyze the tail  
189 structures of newly formed spermatozoa within the seminiferous tubule. HIPK4 loss did not appear  
190 to affect the basal body (Figure 3H-H'), axoneme (Figure 4I-K'), outer dense fibers (Figure 4I-I'),  
191 mitochondria (Figure 4J-J'), or fibrous sheath (Figure 4K-K') of these fully differentiated cells.

192

### 193 *HIPK4-deficient sperm can undergo capacitation and the acrosome reaction in vitro*

194 We next examined how the loss of HIPK4 affects two key aspects of sperm function:  
195 capacitation and the acrosome reaction. Sperm naturally undergo capacitation as they ascend  
196 the female reproductive tract and interact with the oviduct epithelium (*Austin, 1951; Chang, 1951*).  
197 Changes in the glycoproteins, phospholipids, and cholesterol residing in the sperm plasma  
198 membrane, Ca<sup>2+</sup> influx, and increases in intracellular pH correlate with the activation of soluble  
199 adenylate cyclase and protein kinase A (*Abou-haila, et al., 2009; Lin, et al., 1996; O'Rand, 1982;*  
200 *Stival, et al., 2016*). Downstream protein tyrosine phosphorylation signaling events are initiated,  
201 and sperm switch from progressive motility to a "hyperactivated" swimming motion (*Alvau, et al.,*  
202 *2016; Naz, et al., 2004; Sepideh, et al., 2009*). Capacitated sperm also become competent for the  
203 acrosome reaction, during which the outer acrosomal membrane fuses with the overlying plasma

204 membrane (Hirohashi, 2016; Kierszenbaum, 2000; Stival, et al., 2016). This process causes the  
205 release of digestive enzymes stored within the acrosome, and it exposes oocyte-binding receptors  
206 that are displayed on the inner acrosomal membrane, which spreads down over the equatorial  
207 region of the sperm head (Sebkova, et al., 2014; Sosnik, et al., 2009). Together, these steps  
208 ultimately promote sperm-oocyte engagement, fusion, and fertilization.

209 To determine whether HIPK4 is required for sperm capacitation, we isolated motile sperm  
210 from the caudal epididymides of wild-type, *Hipk4*<sup>+/-</sup>, and *Hipk4*<sup>-/-</sup> mice and incubated them in  
211 capacitation medium containing Ca<sup>2+</sup>, bicarbonate, and bovine serum albumin. We then assessed  
212 the resulting levels of tyrosine phosphorylation (p-Tyr) in soluble sperm lysates by western blot.  
213 We observed no significant differences in p-Tyr between the three *Hipk4* genotypes (Figure 3 –  
214 figure supplement 2A), and by CASA, we found that wild-type, *Hipk4*<sup>+/-</sup>, and *Hipk4*<sup>-/-</sup> sperm  
215 treated with capacitation medium undergo similar changes in progressive motility (Figure 3C).  
216 These results indicate that *Hipk4*<sup>-/-</sup> sperm are competent for capacitation *in vitro*.

217 To investigate the ability of HIPK4-deficient sperm to undergo acrosomal exocytosis, we  
218 incubated capacitated sperm with the Ca<sup>2+</sup> ionophore A23187. Sperm were then fixed, quickly  
219 permeabilized, and labeled with fluorescein-conjugated peanut agglutinin (FITC-PNA), which  
220 binds to the outer acrosome membrane and is lost upon exocytosis. After 1.5 hours of  
221 capacitation, 86% of wild-type sperm had fully intact acrosomes, whereas only 63% of mutant  
222 sperm retained acrosomes (due to either head malformations or spontaneous acrosome  
223 exocytosis). As expected, A23187 treatment decreased the percentage of FITC-PNA positive  
224 cells in both wild-type and *Hipk4*<sup>-/-</sup> samples (to 22% and 45%, respectively), although mutant  
225 sperm responded less efficiently to this treatment.

226 To further assess the acrosome reaction in *Hipk4*<sup>-/-</sup> sperm, we examined specific acrosomal  
227 proteins during A23187-induced exocytosis: ZP3R, IZUMO1, and SPACA1. ZP3R (also known  
228 as sp56) is a zona pellucida-binding protein that appears on the sperm surface after capacitation,  
229 and it is released when the outer acrosomal and plasma membranes fuse (Kim, K. S., et al.,



230 2001). IZUMO1 (Inoue, et al., 2005; Sebkova, et al., 2014) and SPACA1 (Fujihara, et al., 2012)  
231 are membrane proteins required for head shaping and oocyte fusion that localize to distinct  
232 acrosomal regions. IZUMO1 spreads from the anterior acrosomal cap to the equatorial segment  
233 during the acrosome reaction (Inoue, et al., 2005; Sebkova, et al., 2014), and SPACA1 remains  
234 localized to the equatorial region (Figure 3H) (Fujihara, et al., 2012). As assessed by  
235 immunofluorescence microscopy, all three acrosomal factors exhibited HIPK4-independent  
236 behaviors in response to  $Ca^{2+}$  ionophore exposure. Together, these findings suggest that HIPK4-  
237 deficient sperm are capable of normal acrosomal changes, at least in response to calcium  
238 signaling.

239

#### 240 *HIPK4-deficient sperm exhibit diminished oocyte binding*

241 Since *Hipk4*<sup>-/-</sup> sperm retain their ability to undergo capacitation and the acrosome reaction  
242 *in vitro*, we considered whether the head defects caused by HIPK4 loss might compromise sperm-  
243 oocyte interactions. Equivalent numbers of motile, capacitated sperm from wild-type, *Hipk4*<sup>+/-</sup>, or  
244 *Hipk4*<sup>-/-</sup> males were incubated with cumulus-oocyte complexes (COCs) in human tubal fluid (HTF)  
245 supplemented with  $Ca^{2+}$  and glutathione. The complexes were then washed repeatedly, fixed,  
246 and oocyte-bound sperm were quantified by nuclear staining and confocal imaging (Figure 3I).  
247 Consistent with the incompetence of *Hipk4*<sup>-/-</sup> sperm for IVF, these cells bound less efficiently to  
248 oocytes in comparison to their wild-type and heterozygous mutant counterparts. We further noted  
249 that the COCs incubated with mutant sperm retained many cumulus cells, while all of the cumulus  
250 cells of the COCs exposed to wild-type sperm were detached (Figure 3 – figure supplement 2).  
251 Thus, HIPK4-deficient sperm lack structural and/or molecular features that are required for  
252 maximally productive sperm-oocyte interactions.

253

254

255 *Loss of HIPK4 function disrupts the acrosome-acroplaxome complex*

256 To gain insights into the spermatogenic defects caused by loss of HIPK4, we compared  
257 periodic acid-Schiff (PAS)-stained testis sections obtained from adult wild-type and *Hipk4*<sup>-/-</sup> mice.  
258 *Hipk4*<sup>-/-</sup> testes contained malformed elongating spermatids, which failed to properly extend by  
259 step 12 (Figure 4A-A', Figure 4 – figure supplement 1A-B). In addition, stage IX and X tubules  
260 from mutant mice contained spermatozoa that were still attached to Sertoli cells. Since these  
261 mature germ cells are normally released into the seminiferous lumen by stage VIII, HIPK4-  
262 deficient spermatozoa appear to have delayed spermiation, which may also contribute to the  
263 lower sperm counts observed in *Hipk4*<sup>-/-</sup> mice. Despite their morphological abnormalities, *Hipk4*<sup>-/-</sup>  
264 spermatozoa released to the epididymis progressed normally to the cauda (Figure 4B-B',  
265 Figure 4 – figure supplement 1C-D).

266 Next, we analyzed spermatid structures in greater detail by TEM imaging of testis sections.  
267 Although HIPK4 protein expression peaks in step 5-7 spermatids, all *Hipk4*<sup>-/-</sup> round spermatids  
268 appeared normal by TEM (Figure 4C-C', Figure 4 – figure supplement 2A). Spermatids begin to  
269 elongate at step 8, and most of these cells appeared normal in *Hipk4*<sup>-/-</sup> testes. However, some  
270 HIPK4-null step 8 spermatids contained highly amorphous, fragmented acrosomal vesicles and/or  
271 detached acrosomal granules, which were coincident with structural abnormalities to the anterior  
272 nuclear pole (Figure 4 – figure supplement 2A). Aberrant head structures became universally  
273 apparent in step 9-10 *Hipk4*<sup>-/-</sup> spermatids (Figure 4C-C'). The acrosome-acroplaxome marginal  
274 ring was no longer juxtaposed to the perinuclear ring of the manchette, significantly widening the  
275 groove belt and deforming the underlying nuclear lamina (Figure 4D-D'). In some cases,  
276 enlargement of the groove belt was accompanied by detachment of the acrosome, severe anterior  
277 head deformities, and retention of spermatid cytoplasm (Figure 4 – figure supplement 2B). We  
278 also observed small electron-dense areas at the posterior boundary of the acroplaxome that have  
279 not been previously defined. These electron-dense structures appeared to interact with the



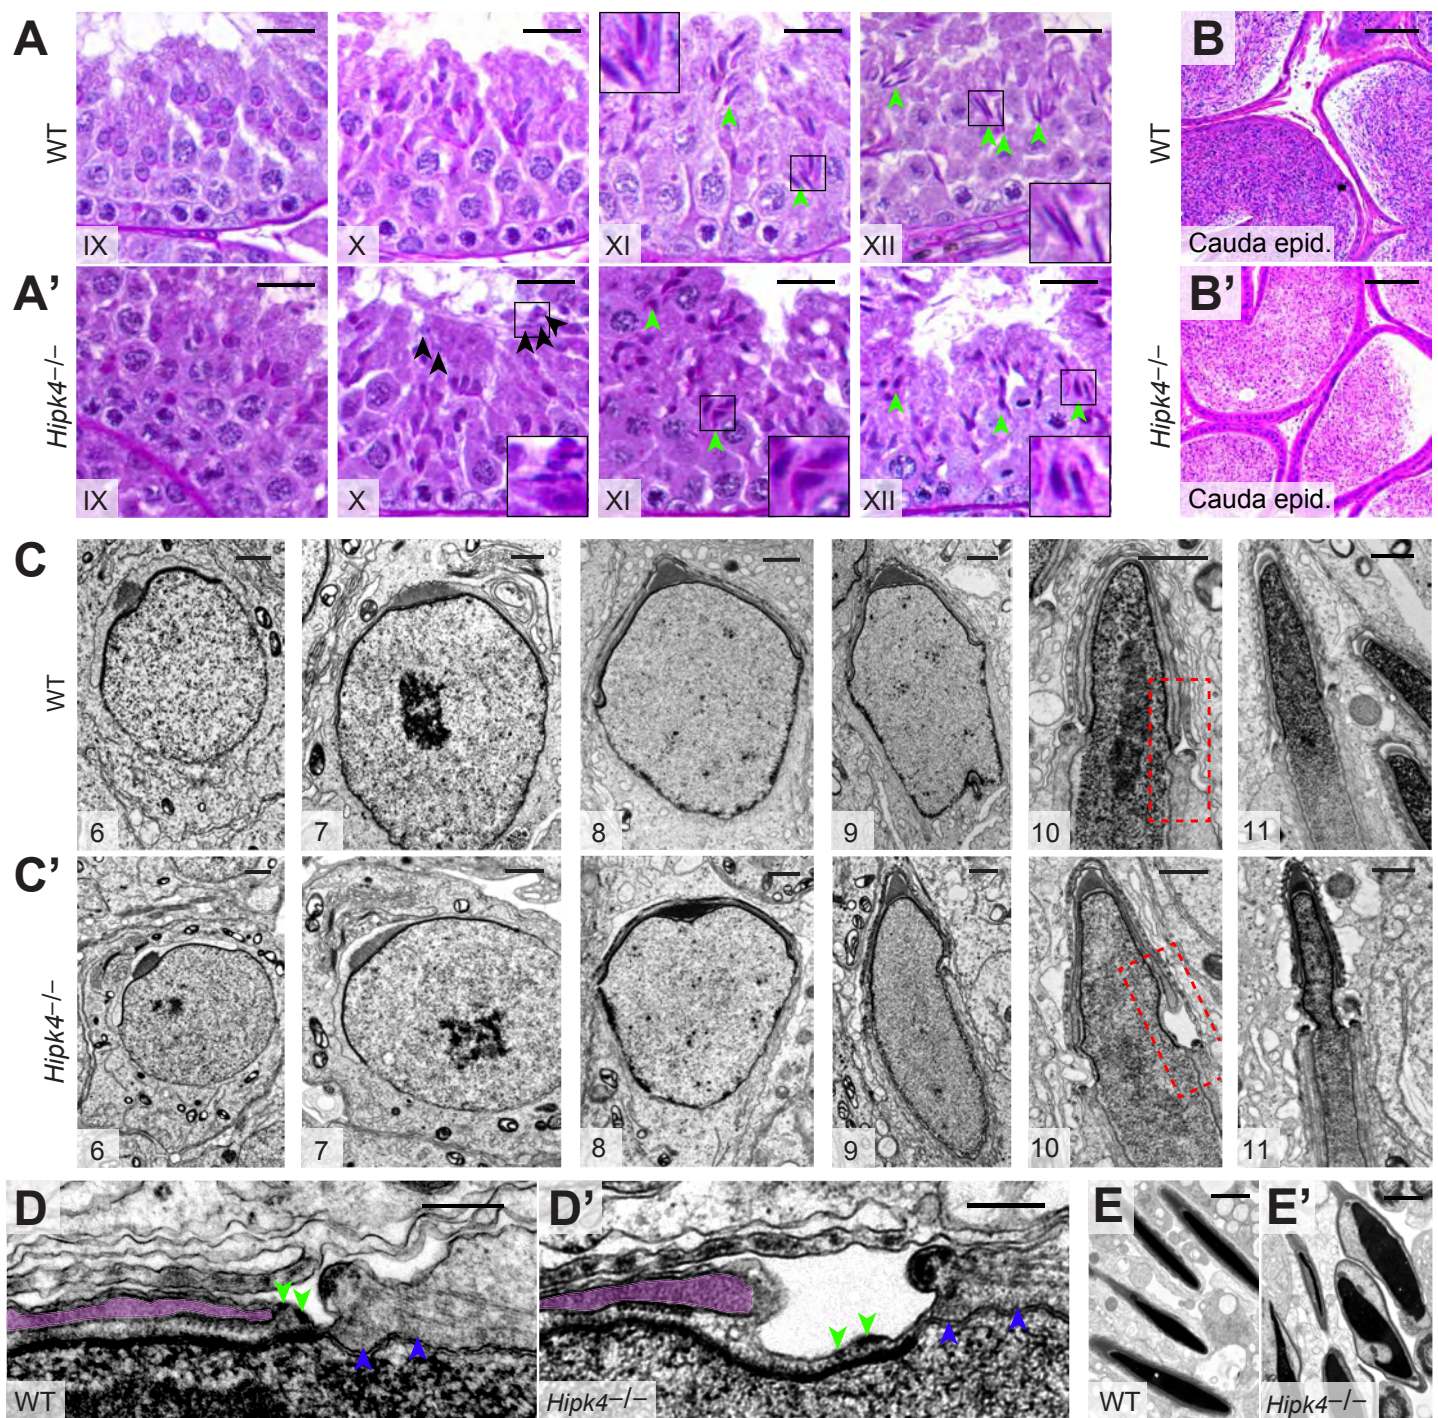

**Figure 4. HIPK4 regulates the acrosome-acroplaxome complex.** (A,A') PAS-stained sections of seminiferous tubules from WT or *Hipk4*<sup>-/-</sup> mice at various stages of spermatogenesis. Black arrowheads point to testicular spermatozoa that are retained in a stage X *Hipk4*<sup>-/-</sup> tubule. Green arrowheads point to the heads of elongating spermatids. (B, B') H&E-stained sections of caudal epididymides from WT or *Hipk4*<sup>-/-</sup> mice. (C-E) TEM images. (C, C') Step 6-11 spermatids from WT or *Hipk4*<sup>-/-</sup> mice. Areas outlined by the red dashed boxes are shown at higher magnification in D-D'. (D, D') Magnified view of the groove belt region of step 10 spermatids. Green arrowheads point to electron densities in the acroplaxome that are normally associated with the posterior edge of the acrosome (highlighted in purple). Blue arrowheads point to filaments linking the manchette to the nuclear envelope. (E, E') TEM images of condensed spermatids in WT and *Hipk4*<sup>-/-</sup> testis sections. Scale bars: A-B, 20  $\mu$ m; C, 1  $\mu$ m; D, 0.2  $\mu$ m; E, 2  $\mu$ m.

280 acrosome in wild-type spermatids, but they were disorganized and uncoupled from this organelle  
281 in HIPK4-null cells (Figure 4D-D', Figure 4 – figure supplement 2C).

282 In contrast to the acroplaxome-acrosome defects, other anterior head structures appeared  
283 to form properly in HIPK4-deficient spermatids. For example, the anterior nuclear membrane  
284 (nuclear dense lamina) is putatively anchored to the acroplaxome *via* the inner membrane protein  
285 DPY19L2, while the outer acrosomal membrane is connected to the cytoskeleton via a LINC  
286 complex composed of SUN1 and nesprin3. These membrane-cytoskeleton linkages had  
287 comparable subcellular distributions in wild-type and *Hipk4*<sup>-/-</sup> spermatids, as assessed by  
288 immunofluorescence imaging of isolated germ cells (Figure 4 – figure supplement 3A-B). TEM  
289 analyses similarly revealed no overt defects within the manchette, including the perinuclear ring  
290 and the conical array of filaments that scaffold the posterior nuclear pole (Figures 4C-C', 4D-D').  
291 We further characterized manchette formation and degradation by immunostaining the  
292 microtubule end-binding protein EB3 in testis cryosections and isolated germ cells. Testis sections  
293 from *Hipk4*<sup>-/-</sup> mice exhibited wild-type-like manchette dynamics (Figure 4 – figure supplement 3C).  
294 However, elongating *Hipk4*<sup>-/-</sup> spermatids isolated from dissociated testis tissues occasionally  
295 exhibited abnormally shaped manchettes (Figure 4 – figure supplement 3D), suggesting that  
296 HIPK4 may also regulate certain aspects of this microtubule- and F-actin-scaffolded structure.

297

#### 298 *HIPK4 does not primarily act through transcriptional regulation*

299 Given the delay between the onset of HIPK4 expression in wild-type round spermatids and  
300 the emergence of HIPK4-dependent morphological phenotypes, we investigated whether HIPK4  
301 signaling could regulate the acrosome-acroplaxome complex through transcriptional  
302 mechanisms. Other HIPK family members and related kinases (*e.g.*, DYRKs) localize to the  
303 nucleus and have established roles in transcriptional regulation (*Di Vona, et al., 2015; Rinaldo, et*  
304 *al., 2008*), and HIPK4 can phosphorylate p53 *in vitro* (*Arai, et al., 2007*). We therefore used  
305 oligonucleotide microarrays with full-genome coverage to profile transcriptional differences



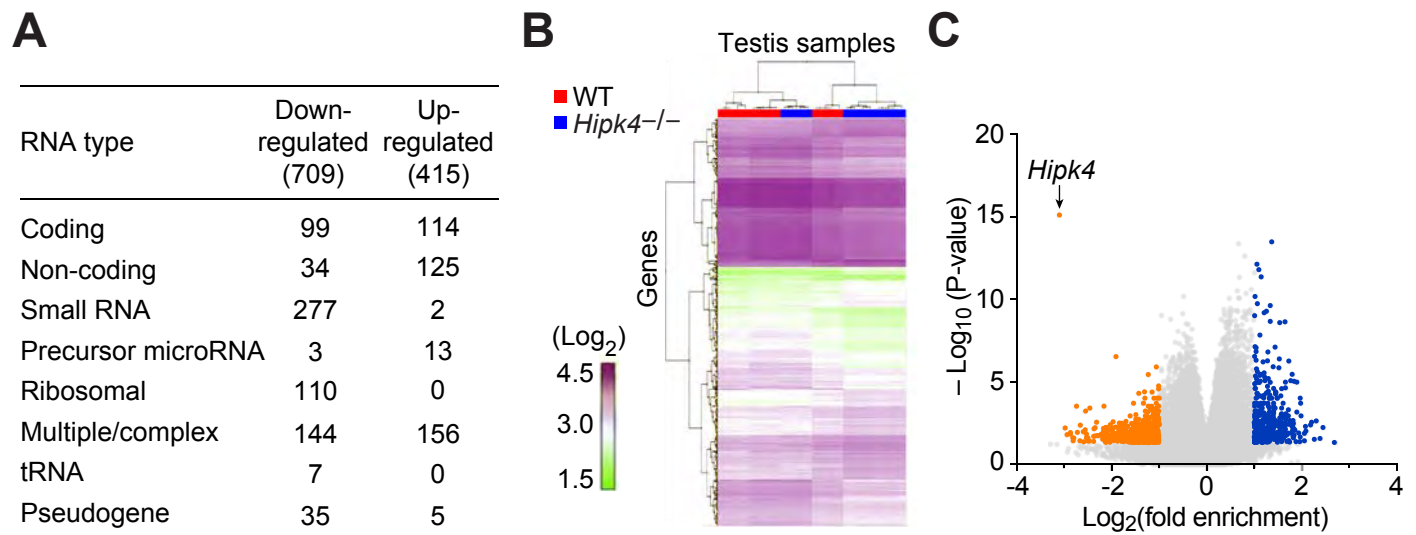

**Figure 5. Wild-type and *Hipk4* mutant testes have similar transcriptomes.** (A) Summary of the types of RNA that were increased (up-regulated) or decreased (down-regulated) in *Hipk4*  $\mu$ ock $\mu$ ut testes compared to wild-type, as measured by quadruplicate microarray analysis of three testis samples. (B) Histogram of normalized signal intensities ( $\text{Log}_2$ ) of gene expression levels in individual microarrays. Color scheme was arbitrarily assigned. (C) Volcano plot depicting the transcriptional differences between *Hipk4*  $\mu$ ock $\mu$ ut and wild-type testes. RNA species that exhibited a  $> 2$ -fold change in abundance and had a  $P$ -value  $< 0.05$  are shown in orange (down-regulated) or blue (up-regulated).

306 between adult testes isolated from wild-type and *Hipk4*<sup>-/-</sup> mice. Through this approach, we  
307 identified 415 genes that were upregulated  $\geq 2$ -fold in *Hipk4*<sup>-/-</sup> testes compared to wild-type tissue  
308 and 709 genes that were downregulated  $\geq 2$ -fold (Figure 5A and Figure 5 – Source data 1).  
309 Hierarchical clustering of the data from biological replicates revealed overlapping groupings of  
310 wild-type and *Hipk4*<sup>-/-</sup> samples (Figure 5B), indicating that the transcriptional differences between  
311 the genotypes are modest. *Hipk4* itself exhibited the largest change in transcript abundance  
312 between genotypes (Figure 5C). We also noted that loss of HIPK4 did not significantly alter the  
313 mRNA levels of transcription factors that are unique to stage 5-7 seminiferous tubules (*Green, et*  
314 *al., 2018*). Based on these microarray data, we surmise that HIPK4 does not primarily act through  
315 transcriptional regulation.

316

#### 317 *HIPK4 overexpression remodels F-actin in cultured somatic cells*

318 In the absence of discrete HIPK4-dependent transcriptional programs, we investigated the  
319 biochemical functions of HIPK4 in cells. We retrovirally overexpressed wild-type *Hipk4* or a  
320 catalytically dead mutant, *Hipk4 K40S* (*Arai, et al., 2007*), in cultured mouse embryonic fibroblasts  
321 (NIH-3T3 cells). Untransduced fibroblasts or those expressing the K40S mutant maintained  
322 spindle-like morphologies, whereas cells expressing HIPK4 became either spherical or polygonal  
323 within two days after infection. The polygonal HIPK4-overexpressing cells were multinucleate,  
324 likely due to cytokinesis failure (Figure 6A-C). Coincident with these changes in cell shape, we  
325 observed a striking loss of F-actin-containing stress fibers in the HIPK4-overexpressing cells  
326 (Figure 6D-E). The overall ratio of globular actin (G-actin) to F-actin did not increase with *Hipk4*  
327 transduction (Figure 6F), suggesting that this kinase induces F-actin remodeling rather than  
328 filament disassembly into monomeric subunits. HIPK4 overexpression did not overtly alter the  
329 microtubule cytoskeleton in these cells (Figure 6G-H).

330 We then compared the phosphoproteomes of NIH-3T3 cells transduced with wild-type  
331 HIPK4, the K40S variant, or a second inactive mutant that is incapable of autophosphorylation-

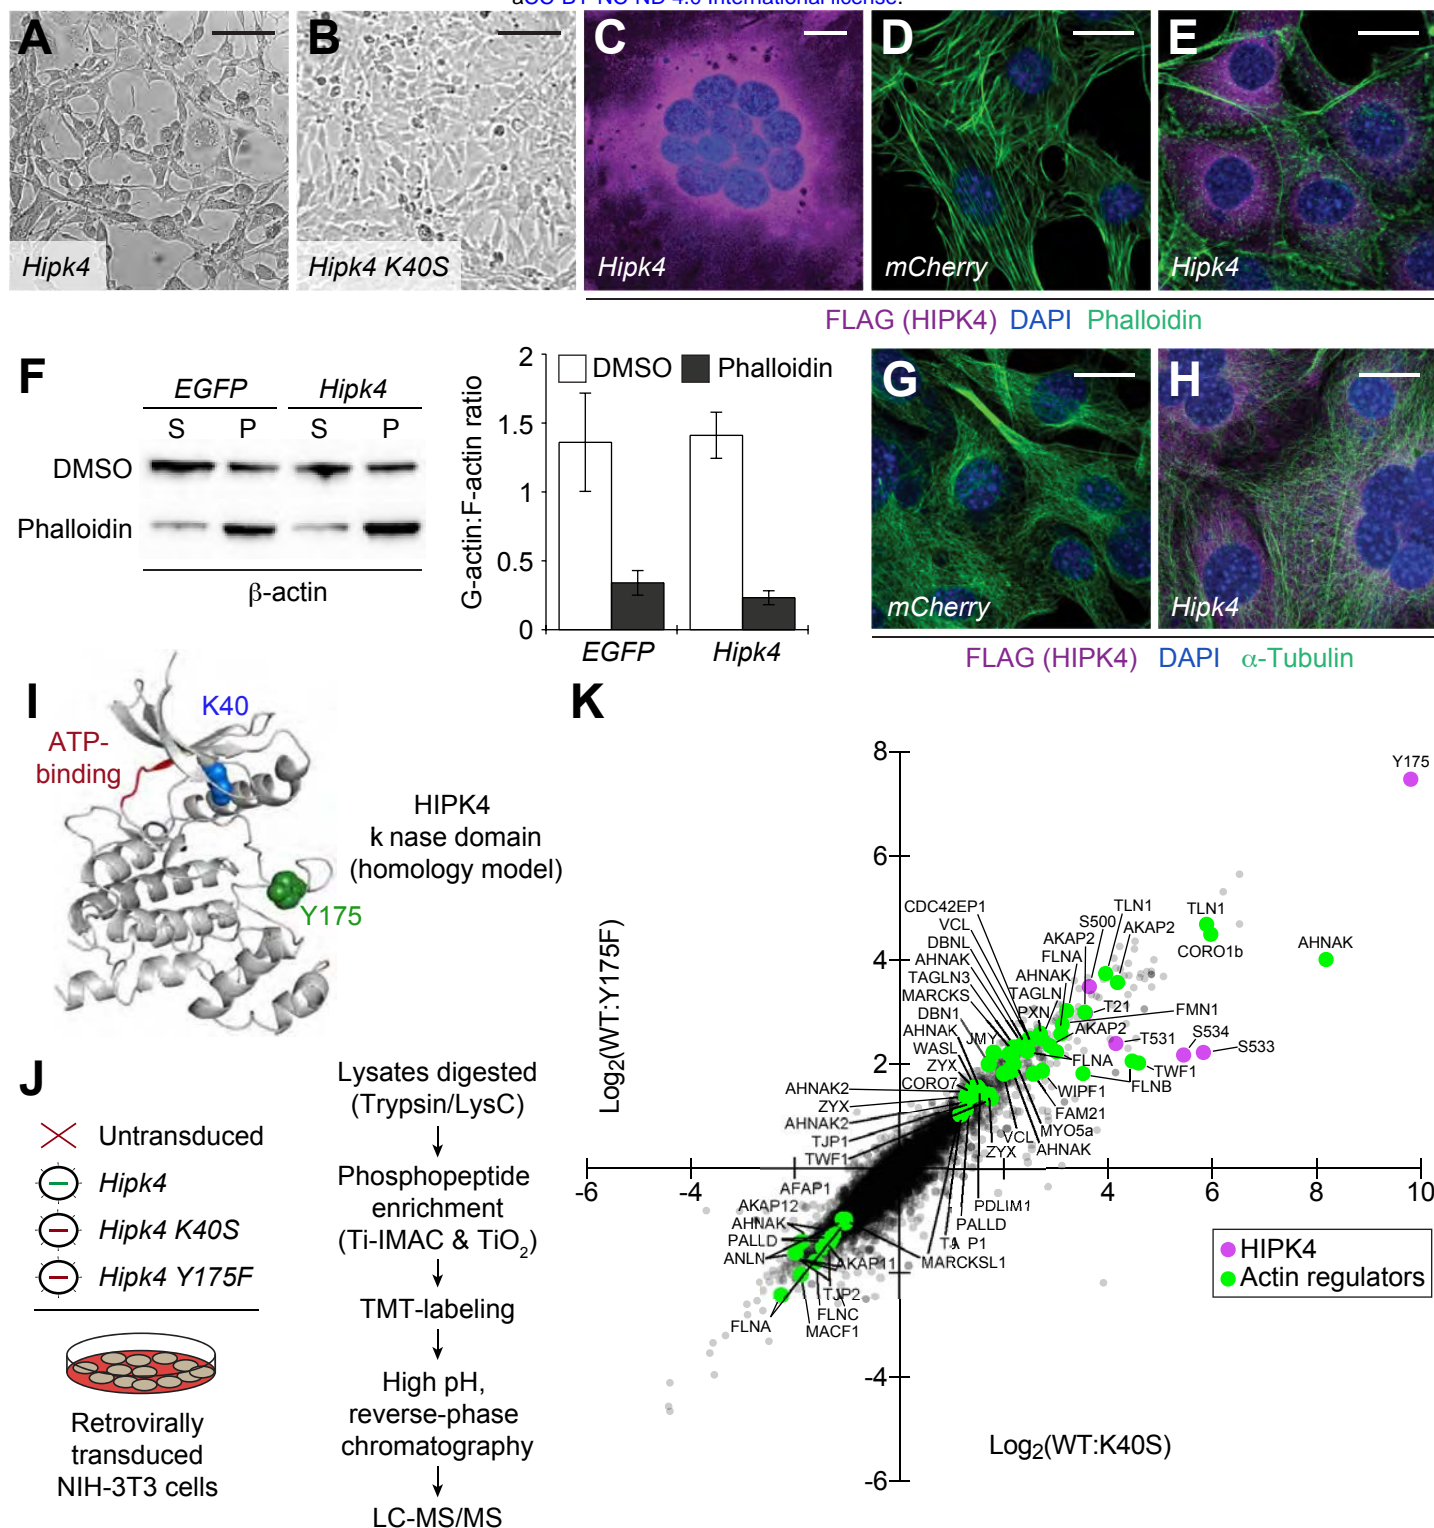

**Figure 6. *Hipk4* overexpression remodels the actin cytoskeleton in cultured cells.** (A-B) Brightfield images of NIH-3T3 cells retrovirally transduced with FLAG-tagged *Hipk4* or kase-dead *Hipk4 K40S*. (C) HIPK4-expressing NIH-3T3 cell with multiple nuclei. (D-E) Phalloidin and anti-FLAG staining of NIH-3T3 cells transduced with *mCherry* or FLAG-tagged *Hipk4*. (F) G- and F-actin levels in NIH-3T3 cells transduced with *EGFP* or FLAG-tagged *Hipk4* and then treated with DMSO or phalloidin after lysis. The western blot shows the soluble (S; G-actin) and pelleted (P; F-actin) pools of actin after ultracentrifugation, and the graph depicts the average G-actin:F-actin ratios of quadruplicate samples  $\pm$  s.e.m. (G-H)  $\alpha$ -Tubulin and FLAG immunostaining of NIH-3T3 cells transduced with *mCherry* or FLAG-tagged *Hipk4*. (I) Homology model of the HIPK4 kase domain using the DYRK1A structure as a template (PDB ID: 3ANQ). The ATP-binding site is colored red, and residues that are essential for catalytic activity are depicted as blue or green space-filling models. (J) Work flow used to characterize the HIPK4-dependent phosphoproteome in NIH-3T3 cells. (K) Scatter plot of 6,941 phosphosites identified by LC-MS/MS, graphed according to their relative levels in NIH-3T3 cells overexpressing wild-type or catalytically inactive HIPK4. Selected HIPK4-regulated phosphosites in actin-modulating proteins are shown in green and phosphosites in HIPK4 are shown in purple. Scale bars: A-B, 100  $\mu$ m; C-E and G-H, 20  $\mu$ m.

332 dependent activation (Y175F) (*van der Laden, et al., 2015*) (Figure 6I-J). Through phosphopeptide  
333 enrichment, isobaric labeling, and quantitative mass spectrometry, we identified 6,941  
334 phosphosites; 303 of which increased in abundance by  $\geq 2$ -fold upon HIPK4 overexpression (in  
335 comparison to either inactive mutant) (Figure 6K and Figure 6 – Source data 1). Consistent with  
336 the effects of HIPK4 overexpression on F-actin dynamics, several of these phosphosites reside  
337 in known actin-interacting proteins. For example, we identified HIPK4-dependent phosphosites in  
338 talin 1 (TLN1), AHNAK nucleoprotein, coronin 1B (CORO1B), A-kinase anchor protein 2 (AKAP2),  
339 formin 1 (FMN1), vinculin (VCL), MARCKS, paxillin (PXN), WASH family members (WASL,  
340 WIPF1, and FAM21), zyxin (ZYG), unconventional myosin 5a (MYO5a), filamins (FLNA and  
341 FLNB), and transgelins (TAGLN and TAGLN3).

342

#### 343 *Loss of HIPK4 alters F-actin dynamics in the spermatid acroplaxome*

344 Because HIPK4 overexpression altered stress fiber dynamics in cultured cells, we  
345 hypothesized that HIPK4 may similarly modulate F-actin-related functions in developing sperm.  
346 In particular, a role for HIPK4 in regulating acroplaxome structure and/or function could explain  
347 the head defects observed in *Hipk4*<sup>-/-</sup> spermatids. We first used fluorescently labeled phalloidin  
348 to visualize F-actin structures in wild-type and *Hipk4*<sup>-/-</sup> testis sections; however, since the  
349 phalloidin staining predominantly labeled the F-actin hoops of Sertoli cells, it was difficult to  
350 discern differences between the samples (Figure 7A). We consequently used the phalloidin probe  
351 to analyze spermatids isolated from dissociated testes, which enabled us to specifically image F-  
352 actin in the acroplaxome. Although there was no discernable difference in acroplaxome F-actin in  
353 round-to-early elongating spermatids isolated from wild-type and *Hipk4*<sup>-/-</sup> testes (Figure 7B), wild-  
354 type but not *Hipk4*<sup>-/-</sup> germ cells maintained this F-actin-based plate at later stages of spermatid  
355 differentiation (e.g., condensed spermatids). To further compare F-actin-related structures in wild-  
356 type and *Hipk4*<sup>-/-</sup> spermatids, we assessed the localization of actin-capping proteins CAPZA3  
357 and CAPZB3 by immunofluorescence microscopy (Figure 7C-D). Consistent with our phalloidin



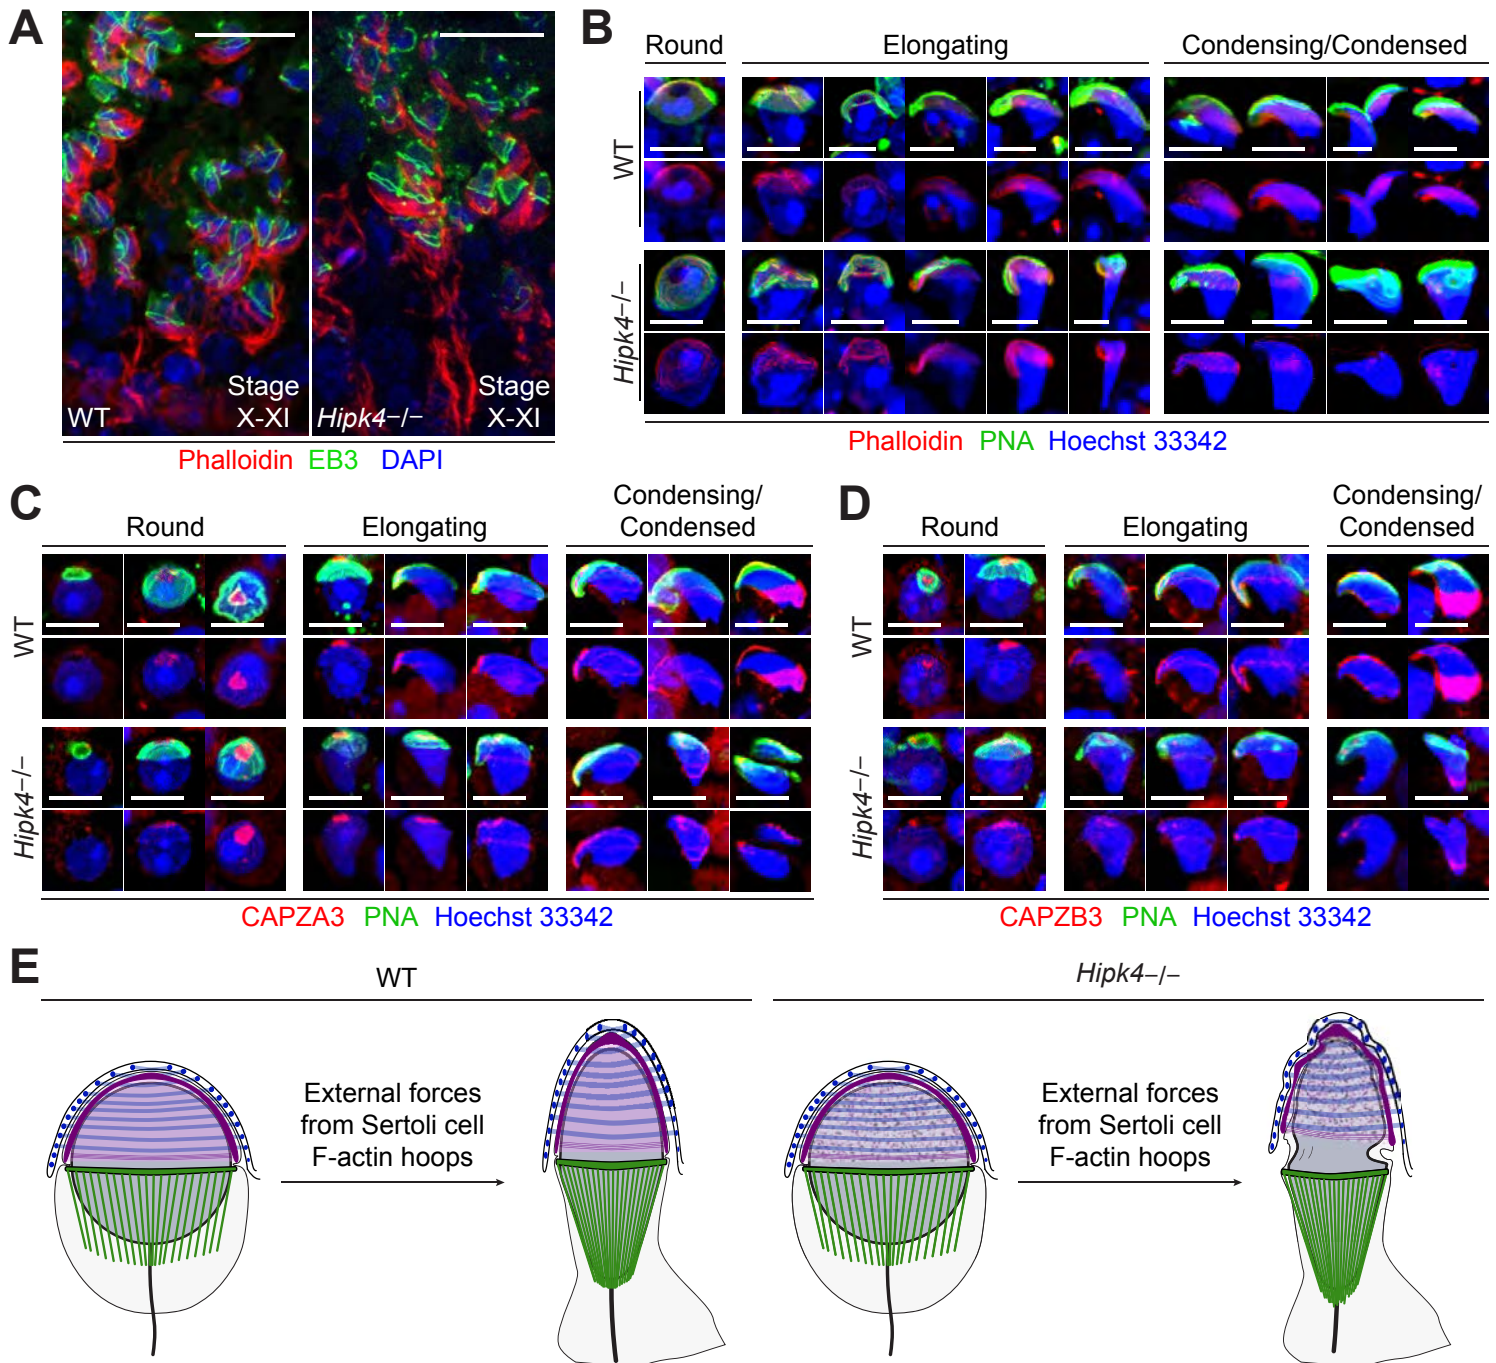

**Figure 7. Loss of HIPK4 function alters F-actin dynamics in the acroplaxome.** (A) Cryosectioned seminiferous tubules (stage X/XI) stained with Alexafluor-647-phalloidin and Alexafluor-488-anti-EB3 antibody to label basal and apical Sertoli cell ectoplasmic specializations. Nuclei were stained with DAPI. (B-D) Enzymatically dissociated elongating spermatids stained with FITC-PNA and Alexafluor-647-phalloidin (B), anti-CAPZA3 (C), or anti-CAPZB3 (D). Nuclei were stained with Hoeschst 33342. (E) A model for HIPK4 function during spermiogenesis. Scale bars: A, 20  $\mu$ m; B-D, 2  $\mu$ m.

358 staining results, elongating wild-type and *Hipk4*<sup>-/-</sup> spermatids exhibited similar expression levels  
359 and subcellular distributions of CAPZA3 and CAPZB3, but these actin regulators were selectively  
360 diminished in condensing *Hipk4*<sup>-/-</sup> spermatids.

361

## 362 **DISCUSSION**

363 HIPK4 is a dual-specificity kinase that is predominantly expressed in differentiating  
364 spermatids, and it has been previously reported that HIPK4 deficiency in mice can alter sperm  
365 morphology and number. Our studies reveal both the cell biological basis and reproductive  
366 consequences of these spermatogenic phenotypes. Our findings establish HIPK4 as an important  
367 regulator of the acrosome-acroplaxome complex during spermiogenesis. *Hipk4*<sup>-/-</sup> spermatids form  
368 abnormal acroplaxome structures, and this F-actin- and keratin-containing plate becomes  
369 uncoupled from the Golgi-derived acrosome, most overtly at the groove belt in these mutant cells.  
370 HIPK4 function is also required to coordinate acrosome-acroplaxome and manchette dynamics  
371 during spermatid elongation, as evidenced by the grossly enlarged groove belt in elongating  
372 *Hipk4*<sup>-/-</sup> spermatids. The resulting spermatozoa have misshapen heads, and a large fraction  
373 exhibit irregular tail morphologies. *Hipk4*<sup>-/-</sup> males have lower concentrations of epididymal sperm,  
374 and these mutant germ cells have lower motility than their wild-type counterparts. Together, these  
375 spermatogenic defects closely mirror those observed in men with severe OAT syndrome, and like  
376 these clinical cases, HIPK4-deficient male mice are sterile.

377 Of these phenotypes, the abnormal head structures of HIPK4-deficient sperm are likely a  
378 dominant cause of sterility. Sperm produced by heterozygous *Hipk4* mutant males have lower  
379 than normal epididymal concentrations of sperm and reduced total motility, but the fertility of these  
380 animals is comparable to that of wild-type mice. Only homozygous *Hipk4* mutant germ cells exhibit  
381 head defects that become increasingly overt during spermiogenesis. Consistent with diminished  
382 head functions, *Hipk4*<sup>-/-</sup> sperm are also incompetent for IVF and have reduced binding and  
383 penetration of COCs. This diminished fertility could reflect structural defects that physically

384 abrogate sperm-egg interactions and/or concomitant perturbations that disrupt molecular  
385 processes within the head. The ability of *Hipk4*<sup>-/-</sup> sperm to undergo capacitation and the acrosome  
386 reaction *in vitro* suggests that key intracellular biochemical pathways remain intact. Nevertheless,  
387 we cannot rule out the possibility that HIPK4 is required for these processes *in vivo*. The reduced  
388 motility of *Hipk4*<sup>-/-</sup> sperm could also affect fertility within the female reproductive tract.

389 Our investigations reveal potential mechanisms by which HIPK4 could regulate the  
390 acrosome-acroplaxome complex. HIPK1-3 have been shown to directly phosphorylate  
391 homeodomain transcription factors (*Kim, Y. H., et al., 1998; Rinaldo, et al., 2008*), and the  
392 structurally related dual-specificity tyrosine-regulated kinase 1a (DYRK1A) targets various  
393 transcriptional activators and repressors (*Di Vona, et al., 2015; Litovchick, et al., 2011; Mao, et*  
394 *al., 2002; Woods, et al., 2001; Yang, et al., 2001*). Although it has been reported that HIPK4 can  
395 phosphorylate p53 *in vitro* (*Arai, et al., 2007; He, et al., 2010*), it is unlikely that HIPK4 acts  
396 primarily through transcriptional control. In contrast to other HIPK family members, HIPK4 lacks  
397 the homeobox-interacting domain and a nuclear localization sequence, and accordingly it  
398 localizes to the cytoplasm rather than the nucleus (*van der Laden, et al., 2015*). Moreover, our  
399 genome-wide microarray analyses reveal that loss of HIPK4 function does not lead to major  
400 transcriptional changes within the testis. These observations suggest that HIPK4 regulates the  
401 acrosome-acroplaxome complex through more direct biochemical mechanisms, and our cell  
402 biological studies strongly implicate HIPK4 in F-actin remodeling. HIPK4 expression in cultured  
403 somatic cells promotes the formation of branched F-actin structures and alters the  
404 phosphorylation state of multiple actin-crosslinking proteins. HIPK4 could similarly modulate F-  
405 actin networks within the acroplaxome. Consistent with this model, HIPK4 deficiency disrupts the  
406 levels of F-actin and actin-capping proteins localized to the acroplaxome marginal ring in  
407 condensing spermatids (CAPZA3 and CAPZB3), perhaps due to cytoskeletal dysregulation at  
408 earlier stages. We further note that transcripts encoding actin cytoskeleton components are  
409 among the few genes that are expressed in a HIPK4-dependent manner within the testis (Figure

410 5 – Source data 1). For example, the actin-related protein *Actr6* and the actin-capping protein  
411 *Capza2* were downregulated in *Hipk4*<sup>-/-</sup> testis tissues, and upregulated genes includes those that  
412 encode actin-membrane crosslinkers (*Tln2*, *Flnb*, and *Ank2*), actin-based motors (*Myo5b* and  
413 *Myo10*), and components of the acrosome matrix (*Zp3r* and *Zan*). We speculate that these  
414 transcriptional changes reflect cellular responses to cytoskeletal defects caused by HIPK4  
415 deficiency.

416 Based on our findings, we propose a model in which HIPK4 promotes F-actin remodeling in  
417 the acroplaxome, modulating its biophysical properties and interactions with the acrosome  
418 (Figure 7E). We hypothesize that loss of HIPK4 function alters acroplaxome stability and  
419 dynamics, rendering this cytoskeletal plate less able to distribute external forces applied by the  
420 Sertoli cell F-actin hoops. As a result, the spermatid nucleus fails to elongate properly, and the  
421 head structure becomes grossly misshapen. HIPK4 deficiency also uncouples the acrosome-  
422 acroplaxome complex at the groove belt, leading to severe anterior malformations that may  
423 disrupt the expulsion of excess cytoplasm and other aspects of spermatid differentiation. It is likely  
424 that germ cells with such significant defects are less competent for spermiation and less viable  
425 after their release into seminiferous tubule lumen, which could account for the lower  
426 concentrations of epididymal sperm in *Hipk4*<sup>-/-</sup> mice.

427 HIPK4 joins the small collection of protein kinases that are known to be enriched or  
428 exclusively expressed in haploid male germ cells and required for spermatogenesis. For example,  
429 the kinases CSNK2A2, SSTK, and CAMKIV function in the spermatid nucleus and promote the  
430 histone-to-protamine transition (*Escalier, et al., 2003; Spiridonov, et al., 2005; Wu, et al., 2000*).  
431 TSSK1 and 2 are testis-specific kinases that regulate the chromatoid body, centrioles, and the  
432 developing sperm flagellum (*Jha, et al., 2013; Kueng, et al., 1997; Shang, P., et al., 2010; Xu, et*  
433 *al., 2008*), and TSSK4 and TSSK5 localize to the flagellum and control sperm motility (*Wang, et*  
434 *al., 2016; Wang, et al., 2015*). The only kinase known to be required for spermatid head shaping  
435 is TR-KIT, a splice variant of c-KIT that regulates manchette formation and later has a role in

436 oocyte activation upon fertilization. A truncated, testis-specific version of FER, FERT,  
437 phosphorylates cortactin in the acroplaxome (*Keshet, et al., 1990; Kierszenbaum, et al., 2008*),  
438 but male mice lacking FERT are still fertile (*Craig, et al., 2001*). To the best of our knowledge,  
439 HIPK4 is the first kinase known to be essential for acrosome-acroplaxome function and male  
440 fertility.

441         Given the druggable nature of kinases, HIPK4 is also a new potential target for male  
442 contraception. Small-molecule HIPK4-specific antagonists could recapitulate the male sterility  
443 caused by disrupting the *Hipk4* gene in mice. Such treatments would reduce male fertility without  
444 interfering with the hypothalamus-pituitary-gonadal axis, damaging the testis or germline, or  
445 introducing genetic abnormalities to offspring if fertilization is achieved. Since HIPK4 expression  
446 is restricted to the final stages of sperm development, HIPK4 inhibitors also would induce sterility  
447 more quickly than drugs that perturb earlier steps in spermatogenesis. Contraceptive reversibility  
448 would be equally rapid. Moreover, HIPK4 antagonists could have minimal non-reproductive  
449 effects, as *Hipk4*<sup>-/-</sup> mice appear to have otherwise normal physiology. Further investigations of  
450 HIPK4 therefore could not only elucidate the mechanisms that drive spermatid differentiation but  
451 also address a longstanding unmet need in reproductive medicine.

452

## 453 **MATERIALS AND METHODS**

### 454 *Ethics statement*

455 All animal studies were conducted in compliance with the Stanford University Institutional  
456 Animal Care and Use Committee under Protocol 29999. Vertebrate research at the Stanford  
457 University School of Medicine is supervised by the Department of Comparative Medicine's  
458 Veterinary Service Center. Stanford University animal facilities meet federal, state, and local  
459 guidelines for laboratory animal care and are accredited by the Association for the Assessment  
460 and Accreditation of Laboratory Animal Care International. De-identified human testis sections  
461 were obtained from Stanford University in compliance with protocol IRB-32801.

462

### 463 *Animal use*

464 *Hipk4*<sup>+/*tm1b*</sup> breeding pairs (C57BL/6NJ background, Stock No. 025579) and wild-type  
465 (C57BL/6NJ, Stock No. 005304) mice were purchased from The Jackson Laboratory. Mice used  
466 for this study were weaned at 19-22 dpp and genotyped using Platinum *Taq* DNA Polymerase  
467 (Invitrogen) and the following primers: wild-type forward 5'-CCTTTGGCCTTATACATGCAC-3',  
468 wild-type reverse 5'-CAGGTGTCAGGTCTGGCTCT-3', mutant forward 5'-CGGTCGCTACCATT  
469 ACCAGT-3', mutant reverse 5'-ACCTTGAGATGACCCTCCTG-3'.

470

### 471 *Tissue distribution of Hipk4*

472 TaqMan primers (Applied Biosystems) for *Hipk4* (Mm01156517\_g1) were used to probe the  
473 Origene TissueScan™ Mouse Normal cDNA Array according to the manufacturer's protocols.  
474 Gene expression levels were normalized to *GAPDH* (Mm99999915\_g1).

475

### 476 *In situ hybridization analysis*

477 Whole testes were dissected and immediately fixed in freshly prepared modified Davidson's  
478 fixative (30% formaldehyde, 15% ethanol, 5% glacial acetic acid, 50% distilled water) for



479 16-20 hours and then washed and stored in 70% ethanol until further use. For *in situ* hybridization  
480 analyses, the fixed tissues were paraffin-embedded, cut into 10- $\mu$ m sections, and mounted on  
481 slides. To detect *Hipk4* transcripts, we used the RNAscope<sup>®</sup> 2.5 HD Detection Kit (Advanced Cell  
482 Diagnostics) with *Hipk4* probes (Mm-Hipk4, 428071), following the manufacturer's protocol for  
483 formalin-fixed, paraffin-embedded (FFPE) sections. Hybridization probes for *Ppib* (BA-Mm-Ppib-  
484 1ZZ, 313911) and *dapB* (BA-DapB-1ZZ, 310043) were used as positive and negative controls,  
485 respectively.

486

#### 487 *Assessment of fecundity*

488 To test fertility by mating, we paired  $\geq$  7-week-old males (wild-type, *Hipk4*<sup>+/-</sup>, and *Hipk4*<sup>-/-</sup>)  
489 with age-matched, wild-type females for 18–21 days, and the number of live-born pups for each  
490 pairing was recorded. Male and female mice were paired in this manner for 2-4 rounds  
491 (6-12 weeks).

492 IVF and ICSI procedures were performed at the Transgenic, Knockout, Tumor Model Center  
493 at Stanford University. For IVF studies, C57BL/6NJ females were superovulated by injection with  
494 PMSG (ProSpec, HOR-272, 5U, 61-63 hours prior to oocyte-harvesting) and hCG (ProSpec,  
495 HOR-250, 5U, 48 hours after PMSG injection). On the day of the experiment, epididymal sperm  
496 were isolated using a “swim-out” method in TYH medium (120 mM NaCl, 5 mM KCl, 2.5 mM  
497 MgSO<sub>4</sub>, 1.0 mM KH<sub>2</sub>PO<sub>4</sub>, 25 mM NaHCO<sub>3</sub>, 2.5 mM CaCl<sub>2</sub>, 1 mM sodium pyruvate, 1.0 mg/mL  
498 glucose, 1.0 mg/mL methyl- $\beta$ -cyclodextrin, and 1.0 mg/mL polyvinylalcohol; pH 7.2) and  
499 transferred to TYH medium containing bovine serum albumin (BSA; final concentration of  
500 5  $\mu$ g/mL). Cumulus-oocyte complexes (COCs) were then harvested from the oviducts of these  
501 superovulated females in M2 medium with HEPES buffer (Sigma, M7167), and transferred  
502 through three 50  $\mu$ L drops of HTF medium (Millipore, MR-070-D) containing 0.25 mM reduced  
503 glutathione under mineral oil, pre-equilibrated to 37 °C, 5% CO<sub>2</sub>. After 1 hour of capacitation,  
504 motile sperm ( $\sim 5.0 \times 10^5$ ) were added to the drop of HTF medium containing COCs and incubated

505 for 4 hours at 37 °C and 5% CO<sub>2</sub>. Sperm-oocyte complexes were then washed four times in M2  
506 medium and incubated in 30 µL KSOM medium (Millipore, MR-101-D) at 37 °C, 5% CO<sub>2</sub> under  
507 mineral oil. The number of two-cell, morula, and blastocyst-stage embryos were then counted  
508 over the next 72 hours.

509 ICSI experiments were performed as previously described (*Yoshida, et al., 2007*). Briefly,  
510 motile sperm were harvested from the epididymis, and sperm heads were injected into the  
511 cytoplasm of CD1 oocytes using a piezo-actuated micromanipulator. The injected embryos were  
512 cultured in KSOM medium at 37 °C. After 24 hours, live two-cell embryos were either cultured  
513 until the blastocyst stage or implanted into the oviducts of pseudo-pregnant female mice.

514

#### 515 *Antibodies*

516 The following primary antibodies were used for western blotting and immunofluorescence  
517 imaging: anti-HIPK4 (FabGennix International, rabbit pAb generated against the peptide  
518 sequence PAGSKSDSNFSNLIRLSQVSPED, lot 1651.Pb1.AP); anti-KPNB1 (H-300) (Santa Cruz  
519 Biotechnology, sc-11367, rabbit pAb); anti-phosphotyrosine (Upstate/Millipore, 4G10<sup>®</sup> Platinum,  
520 05-1050, lot 2723728, rabbit pAb); anti-ZP3R/mouse sp56 (7C5) (QED Bioscience, 55101, lot  
521 051614-120816, mouse mAb); anti-IZUMO1 (125) (Abcam, ab211626, lot GR279965-4, rat mAb);  
522 anti-SPACA1 (Abcam, ab191843, lot GR312512-3, rabbit pAb); anti-FLAG<sup>®</sup> (M2, Sigma, F3165,  
523 mouse mAb); anti-alpha tubulin (3H3085) (Santa Cruz Biotechnology, sc-69970, lot G0109, rat  
524 mAb); anti-CAPZA3 (Progen, GP-SH4, lot 804091, guinea pig pAb); anti-CAPZB3 (Progen, GP-  
525 SH5, lot 804081, guinea pig pAb); anti-DPY19L2 (gift from Christophe Arnoult, rabbit pAb), anti-  
526 SUN1 (gift from Manfred Alsheimer, guinea pig pAb); anti-nesprin3 (gift from Arnoud Sonnenberg,  
527 rabbit pAb); Alexa Fluor<sup>™</sup> 488-conjugated anti-EB3 (EPR11421-B) (Abcam, ab203264, lot  
528 GR227133-1, rabbit pAb).

529 Secondary antibodies included HRP-conjugated sheep anti-mouse IgG (GE Healthcare,  
530 NA931V, lot 9682503), HRP-conjugated donkey anti-rabbit IgG (GE Healthcare, NA934V, lot



531 9780721), Alexa Fluor™ 594-conjugated anti-guinea pig (Invitrogen, A11076, lot 1924784), Alexa  
532 Fluor™ Plus 647-conjugated goat anti-mouse IgG (Invitrogen, A32728, lot UB275580), Alexa  
533 Fluor™ 647-conjugated goat anti-rat IgG (Invitrogen, A21247, lot 37177A), and Alexa Fluor™ Plus  
534 647-conjugated goat anti-rabbit IgG (Invitrogen, A32733, lot TL272452).

535

### 536 *Western blot analysis*

537 To detect HIPK4 protein, testis lysates were prepared by sonication of ~100-mg pieces of  
538 freshly removed whole testis in 1.0 mL ice-cold RIPA buffer containing protease inhibitors  
539 (cOmplete™, EDTA-free Protease Inhibitor Cocktail Tablets, Roche, 4693159001) and  
540 phosphatase inhibitors (PhosSTOP™, Roche, 4906837001). Equivalent amounts (12 µg) of total  
541 protein per sample were diluted with 6x Laemmli sample buffer, boiled for 5 minutes, and loaded  
542 on a 3-8% tris-acetate gel (Bio-Rad) for SDS-PAGE. Proteins were transferred to a PVDF  
543 membrane and immunoblotted with the following primary antibodies: anti-HIPK4 [0.55 µg/mL,  
544 1:1000 dilution in phosphate buffered saline (PBS) containing 0.1% Tween 20 and 4% BSA] or  
545 anti-KPNB1 (1:1000). Chemiluminescence detection was conducted with HRP-conjugated  
546 secondary antibodies and either SuperSignal™ West Dura or SuperSignal™ Femto kits  
547 (Pierce/Thermo Fisher Scientific, 34076 or 34095, respectively).

548

### 549 *Assessment of sperm quality*

550 Epididymides from male mice (8-9 weeks old) were dissected and cleared of fat tissue  
551 before being cut open with fine scissors in 200 µL HTF medium equilibrated at 37 °C and 5%  
552 CO<sub>2</sub>. The sperm suspension (10 µL) was counted and assessed for total motility at 100x  
553 magnification using Leja slides and a microscope equipped with a reticle. Sperm quality  
554 parameters of males (15-17 weeks old) were also assessed by the Mouse Biology Program at  
555 UC-Davis using the following procedures. Morphology was assessed visually, and CASA was  
556 used to confirm sperm concentrations and motility. Sperm were viewed randomly under 400x or

557 1000x magnification to determine the percentage with abnormal head sizes and shapes  
558 (macrocephalous, microcephalous, tapered, triangular, olive, pin, banana, amorphous, collapsed,  
559 abnormal hook, irregularly shaped, etc.) or abnormal midpieces or tails (bent, coiled, short, thin,  
560 crinkles, irregularly shaped, etc.). Sperm were not included in the morphology assessment if they  
561 were: (1) aggregated; (2) had a back or abdomen view of the head; or (3) were decapitated. At  
562 least 100 sperm in 5 or more fields of view were evaluated for each experimental condition.

563

#### 564 *Assessment of sperm maturation and function*

565 To assess capacitation by western blot, motile sperm were collected in 2.5 mL of TYH  
566 medium (BSA-free, pH 7.4, and CO<sub>2</sub>-equilibrated) from cauda epididymides using the “swim out”  
567 method at 37 °C and 5% CO<sub>2</sub>. The sperm suspension was then centrifuged at 600 g, and all but  
568 0.4 mL of the supernatant was removed to achieve a final concentration of ~40 x 10<sup>6</sup> cells/mL. In  
569 fresh polystyrene tubes, 200 µL of the sperm solution was added to 1.0 mL TYH medium  
570 containing BSA (10 mg/mL), and the suspension was incubated at 37 °C for 1.5 hours. The sperm  
571 were then centrifuged at 13,000 g for 1 minute, washed with PBS containing phosphatase  
572 inhibitors, and pelleted once more. After the addition of 1x Laemmli sample buffer without  
573 reducing agent (25 µL), and the samples were boiled for 5 minutes and centrifuged at 13,000 g.  
574 The supernatants were collected and 2 µL of β-mercaptoethanol was added to each sample,  
575 which were then boiled again for 1 minute. Following SDS-PAGE, proteins were transferred to a  
576 PVDF membrane and immunoblotted with an anti-phosphotyrosine antibody (1:1000 dilution,  
577 Upstate/Millipore) for chemiluminescence detection.

578 To perform *in vitro* acrosome reactions, sperm were collected and capacitated as described  
579 above. Following 1.5 hours of capacitation, the Ca<sup>2+</sup> ionophore A23187 (hemicalcium salt; Sigma,  
580 C9275; 1000x stock dissolved in ethanol) was added to the suspensions to achieve final  
581 concentrations of 10 µM. After incubation for 1 hour at 37 °C and 5% CO<sub>2</sub>, and the cells were  
582 pelleted by centrifugation at 600 g, and all but 0.5 mL of the supernatant was removed. The

583 following steps were then performed in microcentrifuge tubes, and the cells were pelleted at 600  
584 g and washed with PBS between each step. Sperm were fixed by adding 2.0 mL 4%  
585 paraformaldehyde in PBS for 15 minutes and permeabilizing with 0.3% Triton-X100 in PBS for 5  
586 minutes. For experiments measuring acrosome exocytosis, the sperm were then incubated for 30  
587 minutes in PBS containing 2% BSA, 0.01% Triton X-100, and fluorescein-conjugated peanut  
588 agglutinin (FITC-PNA, 10 µg/mL, Sigma, L7381, lot 046M4030V) and 10 µg/mL Hoechst 33342  
589 nuclear stain. After washing the cells with PBS, they were mounted on microslides with  
590 Vectashield Vibrance medium (Vector Labs, H-1700, ZE1011). For immunolabeling experiments,  
591 the cells were then divided into separate tubes, blocked for 1 hour with PBS containing 2% BSA  
592 and 0.01% Triton X-100, incubated for 1 hour at room temperature with primary antibodies (10  
593 µg/mL final concentration in blocking buffer), and then washed once with blocking buffer. The  
594 samples were then incubated with fluorescently labeled secondary antibodies and 10 µg/mL  
595 FITC-PNA in blocking buffer for 30 minutes. The sperm were washed once more, transferred to  
596 microscope slides, mounted with Prolong Gold medium with DAPI, and then imaged on a Zeiss  
597 LSM 700 confocal microscope equipped with a 63x oil-immersion objective. ImageJ software  
598 (NIH) was used to create maximum-intensity Z-stack projections, and Photoshop CS6 (Adobe)  
599 was used to crop images and adjust fluorescence intensity levels.

600 To assay for oocyte binding *in vitro*, we followed the same general protocol described for  
601 IVF experiments. After 3 hours of sperm-COC incubation and five washing steps, we transferred  
602 the complexes in a small volume into a 50-µL drop of PBS containing 4% paraformaldehyde on a  
603 microscope slide. After 30 minutes, excess liquid was carefully removed with a Kimwipe, and the  
604 slides were mounted with Prolong Gold medium with DAPI. Fluorescence and DIC imaging on a  
605 Leica DMI8 microscope at 200x magnification were used to assess the number of sperm bound  
606 to oocytes.

607

608

609 *TUNEL assays*

610 To measure DNA double strand breaks by terminal deoxynucleotidyl transferase-mediated  
611 dUTP nick end labeling (TUNEL), we used the *In Situ* Cell Death Detection Kit (Sigma-Aldrich,  
612 11684795910), following the manufacturer's protocol (ver. 17) for cell suspensions. Fluorescence  
613 imaging was performed using a Zeiss LSM 700 confocal microscope equipped with a 63x oil-  
614 immersion objective. ImageJ software (NIH) was used to create maximum-intensity Z-stack  
615 projections and TUNEL-positive cells were manually counted (n = >357).

616

617 *Histology of testis and epididymis*

618 Histological staining (PAS and H&E) was performed on formalin-fixed, paraffin-embedded  
619 testis and epididymis sections (10  $\mu$ m). To obtain these sections, the tissues were removed from  
620 12- to 15-week-old males, immediately fixed in modified Davidson's fixative for 16 hours, and  
621 stored in 70% ethanol until paraffin-embedding, sectioning, and mounting on microscope slides.  
622 The slides then were heated for 1 hour at 50 °C, washed with xylenes, re-hydrated, and stained  
623 with periodic acid solution (Sigma, 3951) and Schiff's reagent (Sigma, 3952016) and/or  
624 counterstained with modified Harris hematoxylin solution (Sigma, HHS32) and Eosin Y (Sigma,  
625 E4009).

626

627 *Electron microscopy*

628 For scanning electron microscopy, epididymal sperm were collected in TYH medium by the  
629 "swim-out" method at 37 °C, pelleted at 200 g, resuspended in 0.1 M sodium cacodylate buffer  
630 (pH 7.4) containing 2% paraformaldehyde and 4% glutaraldehyde, and transferred to individual  
631 wells of a 24-well plate containing poly-D-lysine-coated 12-mm coverslips. The samples were  
632 allowed to fix overnight at 4 °C and then post-stained with 1% aqueous osmium tetroxide (EMS,  
633 19100) for 1 hour. OsO<sub>4</sub>-treated samples were rinsed in ultrafiltered water three times and  
634 gradually dehydrated in increasing concentrations of ethanol (50%, 70%, 90%, 2 x 100%;

635 15 minutes each). Each coverslip was then dried at the critical point with liquid CO<sub>2</sub> using a  
636 Tousimis Autosamdri®-815A system and 15-minute purge time. Dried samples were sputter-  
637 coated (100 Å, Au/Pd) before imaging with a Zeiss Sigma FE-SEM using In-Lens and lateral  
638 Secondary Electron detection at 3.02 kV.

639 For transmission electron microscopy, samples were fixed in 0.1 M sodium cacodylate buffer  
640 (pH 7.4) containing 2% glutaraldehyde and 4% paraformaldehyde at room temperature for 1 hour.  
641 The fixative was then replaced with cold aqueous 1% OsO<sub>4</sub>, and the samples were allowed to  
642 warm to room temperature for 2 hours, washed three times with ultrafiltered water, and stained in  
643 1% uranyl acetate for 2 hours. Samples were then dehydrated in a series of ethanol washes,  
644 beginning at 50%, then 70% ethanol, and then moved to 4 °C overnight. They were then placed  
645 in cold 95% ethanol and allowed to warm to room temperature, changed to 100% ethanol for  
646 15 minutes, and finally to propylene oxide (PO) for 15 minutes. Samples were next incubated  
647 with sequential EMBED-812 resin (EMS, 14120):PO mixtures of 1:2, 1:1, and 2:1 for 2 hours each  
648 and stored overnight in 2:1 resin:PO. The samples were then placed into 100% EMBED-812 resin  
649 for 4 hours, moved into molds with fresh resin, orientated and warmed to 65 °C overnight. Sections  
650 were taken between 75 and 90 nm, picked up on formvar/carbon-coated slot Cu grids, stained for  
651 40 seconds in 3.5% uranyl acetate in 50% acetone, followed by staining in 0.2% lead citrate for  
652 six minutes. The sections were then imaged using a JEOL JEM-1400 120 kV instrument and a  
653 Gatan Orius 832 4k x 2.6k digital camera with 9-µm pixel size.

654

#### 655 *Microarray assay*

656 Three testes from 12-week old wild-type and *Hipk4*<sup>-/-</sup> mice were snap frozen in liquid N<sub>2</sub>,  
657 and stored at -80 °C. Samples were thawed and 50-mg portions were immediately homogenized  
658 in TRIzol, and RNA was isolated using the Direct-zol™ RNA MiniPrep Plus kit (Zymo Research,  
659 R2070S) and stored at -80 °C. RNA profiling was then conducted in quadruplicate Mouse  
660 Clariom™ D assays (Applied Biosystems, 902514), following the manufacturer's protocol. Briefly,

661 50 ng of each sample was used as an input into the GeneChip™ WT Plus Reagent Kit (P/N  
662 902281), and labeled targets were hybridized to arrays in a GeneChip™ Hybridization Oven 645  
663 (00-0331). Washing and staining steps were performed on a GeneChip™ Fluidics Station 450  
664 (P/N 00-0079), and arrays scanned on a GeneChip™ Scanner 3000 7G (P/N 00-210) system.  
665 Data were analyzed using the Transcriptome Analysis Console 4.0 software package.

666

#### 667 *Retrovirus production*

668 Murine *Hipk4* and the *K40S* mutant genes were obtained by PCR using the primers 5'-  
669 CAAAAAAGCAGGCTCAGCCACCATGGCCACCATCCAGTCAGAGACTG-3' and 5'-CAAGAAA  
670 GCTGGGTCGTGGTGGCCCTCCAACATGCTGCAG-3' for wild-type *Hipk4* and 5'-TCGATCCTGA  
671 AGAACGATGCGTACCGAAGC-3' and 5'-GATGGCCACCATTTCACCTGTACTCCGAC-3' for  
672 the *Hipk4-K40S* mutant. pCL-ECO was purchased from Imgenex, and pBMN-I-GFP was provided  
673 by Gary Nolan. For Gateway recombination-mediated cloning, the PCR products were amplified  
674 further with the primers 5'-GGGGACAAGTTTGTACAAAAAAGCAGGCTCA-3' and 5'-GGGGACC  
675 ACTTTGTACAAGAAAGCTGGGTC-3' and Phusion polymerase (New England Biolabs) to add  
676 attB adapter sequences. The clones were then transferred into pDONR223 in a BP recombination  
677 reaction using BP clonase II (Invitrogen) according to the manufacturer's protocols. pDONR223  
678 entry constructs were next transferred to pBMN-3xFLAG-IRES-mCherry-DEST vectors using LR  
679 clonase II (Invitrogen) according to the manufacturer's protocols. pBMN-HIPK4-Y175F-3xFLAG-  
680 IRES-mCherry was later generated by site-directed mutagenesis of the wild type construct using  
681 the primers 5'-CGCTATGTGAAGGAGCCTTTCATCCAGTCCCGCTTC TAC-3' and 5'-GTAGAA  
682 GCGGGACTGGATGAAAGGCTCCTTCACATAGCG-3' and *Pfu*Ultra II Fusion polymerase  
683 (Agilent).

684 Retroviral stocks were prepared from HEK-293T cells seeded in 10-cm tissue culture dishes  
685 (~4 x 10<sup>6</sup> cells/dish) in 10 mL of culture medium. Approximately 18 hours post-seeding, each 10-  
686 cm dish was transfected as follows: pBMN-3xFLAG-IRES-mCherry-DEST plasmids containing

687 wild type or mutant *Hipk4* (7.4  $\mu$ g) and the pCL-ECO retrovirus packing vector (4.4  $\mu$ g) were  
688 diluted in OMEM medium (375  $\mu$ L). This DNA mixture was added to 40  $\mu$ L Fugene® HD reagent  
689 (Promega) in OMEM (335  $\mu$ L) and incubated at room temperature for 15 minutes, before being  
690 gently added to culture medium on cells. After 24 hours, the medium was replaced with DMEM  
691 containing 10 mM HEPES (pH 7.4), 3% fetal bovine serum, 7% calf serum, and 1% sodium  
692 pyruvate. Retrovirus-containing supernatant was then collected three times at 24-hour intervals,  
693 passed through a 0.45- $\mu$ m filter, and stored at -80 °C.

694

#### 695 *Quantitative phosphoproteomics by mass spectrometry*

696 To obtain peptides suitable for phospho-enrichment and mass spectrometry studies, NIH-  
697 3T3 cells (passage 6) were seeded in 10-cm dishes (five per condition) at  $1.5 \times 10^6$  cells/dish with  
698 DMEM containing 10% calf serum, 0.1% sodium pyruvate, 100 U/mL penicillin, and 0.1 mg/mL  
699 streptomycin and transduced after 12 hours with the appropriate retrovirus and polybrene  
700 (8  $\mu$ g/mL) to achieve a multiplicity of infection (MOI) >4. After 48 hours, the culture medium was  
701 replaced with DMEM containing 0.1% CS for 4 hours, and then all dishes were transferred to a  
702 cold room, rinsed twice with ice-cold PBS, and incubated on a rocker for 10 minutes with 0.4 mL  
703 RIPA lysis buffer containing protease inhibitors (cOmplete™ tablets, Roche) and phosphatase  
704 inhibitors (PhosSTOP™ tablets, Roche; 0.2 mM PMSF, Sigma). Cells were manually scraped off  
705 of each dish, and the suspensions were transferred to 15-mL Falcon tubes on ice. Cells were  
706 sonicated for 30 seconds on ice, and the lysates were cleared by centrifugation at 14000 *g*. A  
707 portion of each lysate was removed for protein concentration determination and western blot  
708 analyses. The remaining protein lysates were precipitated with 14 mL of cold acetone at -80 °C.  
709 Precipitates were pelleted, the supernatant was thoroughly removed, and proteins were  
710 resolubilized with 2.0 mL of 8.0 M urea, 50 mM sodium bicarbonate (pH 8.0). Samples were  
711 reduced at room temperature for 30 minutes with the addition of DTT to a final concentration of  
712 5 mM, and then alkylated in the dark using acrylamide at a final concentration of 10 mM for



713 30 minutes. To digest proteins, samples were diluted to 1 M urea with 50 mM sodium bicarbonate  
714 (pH 8.0), Protease Max Surfactant (Promega, V2072) was added to a final concentration of  
715 0.03%, and a Trypsin–LysC protease mix (Promega, V5073) was added at ~1:40 ratio to the  
716 protein concentration of each sample. Samples were incubated at 37 °C for 14 hours.

717 The digests were acidified to pH 3.5 with formic acid and incubated for 15 minutes at 37 °C  
718 to break down surfactants. Peptides were purified using Oasis HLB columns (3 mL) (Waters Co.,  
719 WAT094226) according to the manufacturer’s protocol, lyophilized overnight, and resolubilized in  
720 a 4:1 acetonitrile/H<sub>2</sub>O mixture containing 0.1% trifluoroacetic acid. Peptide concentrations were  
721 determined using the Pierce Peptide Quantification Colorimetric Assay. Samples were adjusted  
722 to 1.0 mg/mL by adding a 4:1 acetonitrile/H<sub>2</sub>O mixture containing 0.2% trifluoroacetic acid, and  
723 20 µL of the resulting solution was saved for “total peptide” mass spectrometry runs. A standard  
724 set of phosphopeptides (4 pmol/peptide sample, MS PhosphoMix1 Light, Sigma, MSPL1) were  
725 spiked into each sample. Phosphopeptide-enrichment steps were performed using a 1:1 mix of  
726 MagReSyn® Ti-IMAC and MagReSyn® TiO<sub>2</sub> resins (ReSyn, MR-TIM005 and MR-TID005)  
727 according to the manufacturer’s protocols. The eluted peptides were acidified to pH 2.5 with 10%  
728 TFA in H<sub>2</sub>O and reduced to a volume of 5-10 µL using a SpeedVac concentrator. The samples  
729 were further enriched for hydrophilic peptides by purification through graphite spin columns  
730 (Pierce, 88302) according to the manufacturer’s protocol. Samples were adjusted to pH ~8.0 with  
731 a 100 mM triethylammonium bicarbonate solution and dried on a SpeedVac concentrator. The  
732 peptides from different conditions were then isobarically labeled using the TMT-6plex kit (Pierce,  
733 90061) according to the manufacturer’s protocols and pooled together. Finally, these pooled  
734 peptide samples were fractionated into six fractions using a high-pH reversed-phase peptide  
735 fractionation kit (Pierce, 84868, lot RF231823B), and each fraction was run on a Thermo Orbitrap  
736 Fusion Tribrid for LC-MS/MS analysis.

737 Peptides were identified using SEQUEST software, and individual species were removed  
738 from the analysis if they: (1) had a false discovery rate was above 1%; (2) were contaminating



739 peptides (i.e. bovine or human); (3) were not phosphorylated. The signal intensities were then  
740 normalized for each TMT channel, based on the sum of the signals detected for the standard  
741 phosphopeptide mix that had been spiked into each sample prior to the phospho-enrichment step.  
742 Peptides that were identified as having the same phosphorylation state were combined,  
743 converging on 6,947 phosphosites with their associated A scores. The fraction of individual TMT  
744 signals relative to the total intensity for each peptide was then determined.

745

#### 746 *Immunofluorescence studies*

747 To determine the effects of *Hipk4* overexpression in NIH-3T3 cells, the fibroblasts were  
748 seeded into 6-well plates at a density of 150,000 cells/well and infected 18 hours later with the  
749 appropriate retrovirus at an MOI of ~4. One day after infection, cells were reseeded into 24-well  
750 plates containing poly-D-lysine-coated 12-mm glass coverslips and cultured for 24 hours in  
751 DMEM containing 10% calf serum, 100 U/mL penicillin, and 0.1 mg/mL streptomycin. The cells  
752 were then treated with DMEM containing 0.5% calf serum and the antibiotics for an additional  
753 24 hours, fixed in PBS containing 4% paraformaldehyde for 10 minutes at room temperature, and  
754 washed 3 x 5 minutes with PBS. The cells were permeabilized with PBS containing 0.3% Triton  
755 X-100 for 5 minutes and blocked for 2 hours at 4 °C in PBS containing 2% BSA and 0.1% Triton  
756 X-100. The cells were then incubated for 1 hour at room temperature with primary antibodies  
757 (1:200 dilution in blocking buffer), washed 3 x 5 minutes with PBS, incubated for 30 minutes with  
758 the appropriate secondary antibodies (1:400 dilution in blocking buffer) and/or Alexa Fluor™-647  
759 conjugated phalloidin (1:400, Invitrogen, A22287, lot 1884190), and washed twice more with PBS.  
760 Nuclei were stained with DAPI, and the coverslips were rinsed briefly in water and mounted onto  
761 slides using Prolong Gold Antifade reagent (Invitrogen).

762 Immunofluorescence imaging of testis sections was conducted using cryosections of fresh  
763 frozen tissue (10 µm thick). Once sectioned, samples were fixed on the slides with PBS containing  
764 4% paraformaldehyde for 30 minutes at room temperature, permeabilized with PBS containing

765 1% Triton-X-100 for 15 minutes, blocked with PBS containing 2% BSA and 0.01% Triton X-100,  
766 incubated with primary antibody (10 µg/mL in blocking buffer) for 2 hours, washed three times  
767 with PBS containing 0.01% Triton X-100, incubated with secondary antibody (1:400 dilution in  
768 blocking buffer) along with either Alexa Fluor™-conjugated phalloidin (1:400) or fluorescently  
769 labeled anti-EB3 (1:100), for 30-45 minutes, washed three times with PBS containing 0.01%  
770 Triton X-100, and mounted with coverslips with Prolong Gold with DAPI.

771 Immunofluorescence imaging of isolated spermatids was conducted on cells enzymatically  
772 dissociated from seminiferous tubules. Briefly, testes were dissected and decapsulated in warm  
773 DMEM containing HEPES (10 mM, pH 7.4). Collagenase Type I (final concentration of 1.5 mg/mL,  
774 Worthington Biochemical, LS004194, lot SF8B18091A) and DNase I (1.0 mg/mL) were added,  
775 and tubules were gently separated and incubated at 37 °C for 15 minutes. The tubules were then  
776 transferred to DMEM, cut into small fragments using fine scissors, and incubated with trypsin  
777 (2.0 mg/mL, Worthington Biochemical, LS003702) and DNase I (2.0 mg/mL) in DMEM for  
778 20 minutes at 37 °C with vigorous physical mixing every 4 minutes using a plastic transfer pipette.  
779 BSA was added to stop enzymatic digestion, and the cells were pelleted at 400 g for 10 minutes  
780 at 4 °C. The cells were thoroughly resuspended in PBS containing 1 mg/mL polyvinyl alcohol  
781 (PVA) and carefully loaded onto a gradient column of BSA in DMEM containing HEPES buffer  
782 (10 mM, pH 7.4). The columns contained 25-mL zones of 4%, 3%, 2%, and 1% BSA. After 4 hours  
783 of gravity sedimentation, fractions of cells were collected, and those containing round, elongating,  
784 and condensed spermatids were combined and pelleted at 400 g. Cells were suspended in the  
785 PBS/PVA buffer, pelleted, suspended in a hypotonic sucrose solution (20 mM HEPES, 50 mM  
786 sucrose, 17 mM sodium citrate) for 10 minutes, pelleted, and then fixed in PBS containing 4%  
787 paraformaldehyde at room temperature for 15 minutes. The cells were then permeabilized with  
788 PBS containing 1 mg/mL PVA and 1.0% Triton X-100, blocked with PBS containing 2% BSA and  
789 1 mg/mL PVA, and incubated with the appropriate primary antibody (1:50 dilution in blocking  
790 buffer) at 4 °C overnight with end-over-end rotation. After three 10-minute washes with PBS

791 containing 0.01% Triton X-100 and 1 mg/mL PVA at room temperature, the cells were incubated  
792 with the appropriate fluorescently labeled secondary antibody (1:400 dilution in blocking buffer)  
793 along with FITC-PNA (1:1000), Alexa Fluor™-647 conjugated phalloidin (1:400), and/or  
794 fluorescently labeled anti-EB3 (1:200) for colocalization) for 30-45 minutes, washed once,  
795 incubated with PBS/PVA buffer containing Hoechst 33342 dye for 10 minutes at room  
796 temperature, washed once more, and mounted on microscope slides using Vectashield Vibrance  
797 medium.

798 All fluorescence imaging was performed using a Zeiss LSM 700 or 800 confocal microscope  
799 equipped with a 63x oil-immersion objective. ImageJ software (NIH) was used to create  
800 maximum-intensity Z-stack projections, and Photoshop CS6 (Adobe) was used to crop images  
801 and adjust fluorescence intensity levels.

802

### 803 **SUPPLEMENTAL DATA**

804 Figure 2 – Figure supplement 1

805 Figure 2 – Figure supplement 2

806 Figure 3 – Figure supplement 1

807 Figure 3 – Figure supplement 2

808 Figure 4 – Figure supplement 1

809 Figure 4 – Figure supplement 2

810 Figure 4 – Figure supplement 3

811 Figure 5 – Source data 1

812 Figure 6 – Source data 1

813

### 814 **ACKNOWLEDGMENTS**

815 This work was supported by R21 HD78385 (J.K.C.), a Male Contraceptive Initiative  
816 Research Grant (J.K.C.), and postdoctoral fellowships from the American Cancer Society (J.A.C.)

817 and the Male Contraceptive Initiative (J.A.C.). We gratefully acknowledge Chris Adams and Ryan  
818 Lieb (Stanford University Mass Spectrometry Core) for critical help with mass spectrometry  
819 experiments, and Lydia-Marie Joubert (Cell Sciences Imaging Facility, Stanford University) for  
820 providing training related to our scanning electron microscopy experiments. We are also indebted  
821 to Pablo Visconti (University of Massachusetts), Moira O'Bryan (Monash University), George  
822 Gerton (University of Pennsylvania), and Michael Eisenberg (Stanford University) for their  
823 thoughtful discussions and protocols. Antibody reagents were kindly provided by Christophe  
824 Arnoult (Université Grenoble Alpes), Manfred Alsheimer (University of Würzburg), and Arnoud  
825 Sonnenberg (Universiteit Leiden). John Higgins (Stanford University) supplied human testis  
826 sections. The electron microscopy studies were supported, in part, by ARRA Award Number  
827 1S10RR026780-01 from the National Center for Research Resources (NCRR).

828

829

### 830 **AUTHOR CONTRIBUTIONS**

831 J.A.C. designed and performed the experiments, analyzed the data, and wrote the paper.  
832 P.G.R. performed the qPCR and microarray assays. Z.J.H. performed animal husbandry, *in situ*  
833 hybridization, immunofluorescence, and SEM experiments. J.E.E. analyzed mass spectrometry  
834 data, J.J.P. prepared samples for TEM imaging, B.B. performed sperm concentration and percent  
835 motility assays. Y.L., J.L., and H.F. performed IVF and ICSI experiments and assisted with sperm-  
836 oocyte binding assays. J.K.C. designed the experiments, analyzed the data, and wrote the paper.

837

### 838 **AUTHOR COMPETING INTERESTS**

839 J.A.C. has served as a consultant for Vibliome Therapeutics, which is developing small-  
840 molecule inhibitors of HIPK4 and other kinases, and he is now a Principal Scientist at the  
841 company. J. K. C. serves on the Scientific Advisory Board for Vibliome Therapeutics.

842

843

844 **REFERENCES**

- 845 Abou-haila, A. & Tulsiani, D.R. 2009. Signal transduction pathways that regulate sperm  
846 capacitation and the acrosome reaction. *Archives of Biochemistry and Biophysics* **485**: 72-  
847 81. DOI: <https://doi.org/10.1016/j.abb.2009.02.003>, PMID: 19217882.
- 848 Alvau, A. *et al.* 2016. The tyrosine kinase fer is responsible for the capacitation-associated  
849 increase in tyrosine phosphorylation in murine sperm. *Development* **143**: 2325-2333. DOI:  
850 <https://doi.org/10.1242/dev.136499>, PMID: 27226326.
- 851 Arai, S. *et al.* 2007. Novel homeodomain-interacting protein kinase family member, hipk4,  
852 phosphorylates human p53 at serine 9. *FEBS Letters* **581**: 5649-5657. DOI:  
853 <https://doi.org/10.1016/j.febslet.2007.11.022>, PMID: 18022393.
- 854 Austin, C.R. 1951. Observations on the penetration of the sperm in the mammalian egg.  
855 *Australian Journal of Scientific Research. Series B* **4**: 581-596. PMID: 14895481.
- 856 Behnen, M. *et al.* 2009. Testis-expressed profilins 3 and 4 show distinct functional characteristics  
857 and localize in the acroplaxome-manchette complex in spermatids. *BMC Cell Biology* **10**:  
858 34. DOI: <https://doi.org/10.1186/1471-2121-10-34>, PMID: 19419568.
- 859 Berruti, G. & Paiardi, C. 2011. Acrosome biogenesis: Revisiting old questions to yield new  
860 insights. *Spermatogenesis* **1**: 95-98. DOI: <https://doi.org/10.4161/spmg.1.2.16820>, PMID:  
861 22319656.
- 862 Castillo, J. *et al.* 2019. Human testis phosphoproteome reveals kinases as potential targets in  
863 spermatogenesis and testicular cancer. *Molecular & Cellular Proteomics* **18**: S132-S144.  
864 DOI: <https://doi.org/10.1074/mcp.RA118.001278>, PMID: 30683686.
- 865 Chang, M.C. 1951. Fertilizing capacity of spermatozoa deposited into the fallopian tubes. *Nature*  
866 **168**: 697-698. DOI: <https://doi.org/10.1038/168697b0>, PMID: 14882325.
- 867 Craig, A.W., Zirngibl, R., Williams, K., Cole, L.A. & Greer, P.A. 2001. Mice devoid of fer protein-  
868 tyrosine kinase activity are viable and fertile but display reduced cortactin phosphorylation.



- 869 *Molecular and Cellular Biology* **21**: 603-613. DOI: <https://doi.org/10.1128/MCB.21.2.603->  
870 [613.2001](https://doi.org/10.1128/MCB.21.2.603-613.2001), PMID: 11134346.
- 871 de Boer, P., de Vries, M. & Ramos, L. 2015. A mutation study of sperm head shape and motility  
872 in the mouse: Lessons for the clinic. *Andrology* **3**: 174-202. DOI:  
873 <https://doi.org/10.1111/andr.300>, PMID: 25511638.
- 874 Di Vona, C. *et al.* 2015. Chromatin-wide profiling of dyrk1a reveals a role as a gene-specific rna  
875 polymerase ii ctd kinase. *Molecular Cell* **57**: 506-520. DOI:  
876 <https://doi.org/10.1016/j.molcel.2014.12.026>, PMID: 25620562.
- 877 Escalier, D., Silviu, D. & Xu, X. 2003. Spermatogenesis of mice lacking ck2alpha': Failure of  
878 germ cell survival and characteristic modifications of the spermatid nucleus. *Molecular*  
879 *Reproduction and Development* **66**: 190-201. DOI: <https://doi.org/10.1002/mrd.10346>,  
880 PMID: 12950107.
- 881 Fujihara, Y., Oji, A., Larasati, T., Kojima-Kita, K. & Ikawa, M. 2017. Human globozoospermia-  
882 related gene spata16 is required for sperm formation revealed by crispr/cas9-mediated  
883 mouse models. *International Journal of Molecular Sciences* **18**: DOI:  
884 <https://doi.org/10.3390/ijms18102208>, PMID: 29065458.
- 885 Fujihara, Y. *et al.* 2012. Spaca1-deficient male mice are infertile with abnormally shaped sperm  
886 heads reminiscent of globozoospermia. *Development* **139**: 3583-3589. DOI:  
887 <https://doi.org/10.1242/dev.081778>, PMID: 22949614.
- 888 Geyer, C.B. *et al.* 2009. A missense mutation in the capza3 gene and disruption of f-actin  
889 organization in spermatids of repro32 infertile male mice. *Developmental Biology* **330**: 142-  
890 152. DOI: <https://doi.org/10.1016/j.ydbio.2009.03.020>, PMID: 19341723.
- 891 Gob, E., Schmitt, J., Benavente, R. & Alsheimer, M. 2010. Mammalian sperm head formation  
892 involves different polarization of two novel linc complexes. *PLoS One* **5**: e12072. DOI:  
893 <https://doi.org/10.1371/journal.pone.0012072>, PMID: 20711465.

- 894 Green, C.D. *et al.* 2018. A comprehensive roadmap of murine spermatogenesis defined by  
895 single-cell ma-seq. *Developmental Cell* **46**: 651-667 e610. DOI:  
896 <https://doi.org/10.1016/j.devcel.2018.07.025>, PMID: 30146481.
- 897 Han, F. *et al.* 2017. Globozoospermia and lack of acrosome formation in gm130-deficient mice.  
898 *Cell Death & Disease* **8**: e2532. DOI: <https://doi.org/10.1038/cddis.2016.414>, PMID:  
899 28055014.
- 900 He, Q. *et al.* 2010. Characterization of human homeodomain-interacting protein kinase 4 (hipk4)  
901 as a unique member of the hipk family. *Molecular and Cellular Pharmacology* **2**: 61-68.  
902 PMID: 20508833.
- 903 Hirohashi, N. 2016. Site of mammalian sperm acrosome reaction. *Advances in Anatomy,*  
904 *Embryology and Cell Biology* **220**: 145-158. DOI: [https://doi.org/10.1007/978-3-319-30567-](https://doi.org/10.1007/978-3-319-30567-7_8)  
905 [7\\_8](https://doi.org/10.1007/978-3-319-30567-7_8), PMID: 27194354.
- 906 Inoue, N., Ikawa, M., Isotani, A. & Okabe, M. 2005. The immunoglobulin superfamily protein  
907 izumo is required for sperm to fuse with eggs. *Nature* **434**: 234-238. DOI:  
908 <https://doi.org/10.1038/nature03362>, PMID: 15759005.
- 909 Jha, K.N. *et al.* 2013. Heat shock protein 90 functions to stabilize and activate the testis-specific  
910 serine/threonine kinases, a family of kinases essential for male fertility. *Journal of Biological*  
911 *Chemistry* **288**: 16308-16320. DOI: <https://doi.org/10.1074/jbc.M112.400978>, PMID:  
912 23599433.
- 913 Kanemori, Y. *et al.* 2016. Biogenesis of sperm acrosome is regulated by pre-mrna alternative  
914 splicing of acrbp in the mouse. *PNAS* **113**: E3696-3705. DOI:  
915 <https://doi.org/10.1073/pnas.1522333113>, PMID: 27303034.
- 916 Kang-Decker, N., Mantchev, G.T., Juneja, S.C., McNiven, M.A. & van Deursen, J.M. 2001. Lack  
917 of acrosome formation in hrb-deficient mice. *Science* **294**: 1531-1533. DOI:  
918 <https://doi.org/10.1126/science.1063665>, PMID: 11711676.

- 919 Keshet, E., Itin, A., Fischman, K. & Nir, U. 1990. The testis-specific transcript (fert) of the tyrosine  
920 kinase fer is expressed during spermatogenesis in a stage-specific manner. *Molecular and*  
921 *Cellular Biology* **10**: 5021-5025. DOI: <https://doi.org/10.1128/mcb.10.9.5021>, PMID:  
922 2388634.
- 923 Kierszenbaum, A.L. 2000. Fusion of membranes during the acrosome reaction: A tale of two  
924 snares. *Molecular Reproduction and Development* **57**: 309-310. DOI:  
925 [https://doi.org/10.1002/1098-2795\(200012\)57:4<309::AID-MRD1>3.0.CO;2-W](https://doi.org/10.1002/1098-2795(200012)57:4<309::AID-MRD1>3.0.CO;2-W), PMID:  
926 11066058.
- 927 Kierszenbaum, A.L., Rivkin, E. & Tres, L.L. 2003. Acroplaxome, an f-actin-keratin-containing  
928 plate, anchors the acrosome to the nucleus during shaping of the spermatid head. *Molecular*  
929 *Biology of the Cell* **14**: 4628-4640. DOI: <https://doi.org/10.1091/mbc.e03-04-0226>, PMID:  
930 14551252.
- 931 Kierszenbaum, A.L., Rivkin, E. & Tres, L.L. 2003. The actin-based motor myosin va is a  
932 component of the acroplaxome, an acrosome-nuclear envelope junctional plate, and of  
933 manchette-associated vesicles. *Cytogenetic and Genome Research* **103**: 337-344. DOI:  
934 <https://doi.org/10.1159/000076822>, PMID: 15051957.
- 935 Kierszenbaum, A.L., Rivkin, E. & Tres, L.L. 2007. Molecular biology of sperm head shaping.  
936 *Society for Reproduction and Fertility Supplement* **65**: 33-43. PMID: 17644953.
- 937 Kierszenbaum, A.L., Rivkin, E. & Tres, L.L. 2008. Expression of fer testis (fert) tyrosine kinase  
938 transcript variants and distribution sites of fert during the development of the acrosome-  
939 acroplaxome-manchette complex in rat spermatids. *Developmental Dynamics* **237**: 3882-  
940 3891. DOI: <https://doi.org/10.1002/dvdy.21789>, PMID: 18985748.
- 941 Kierszenbaum, A.L., Rivkin, E. & Tres, L.L. 2011. Cytoskeletal track selection during cargo  
942 transport in spermatids is relevant to male fertility. *Spermatogenesis* **1**: 221-230. DOI:  
943 <https://doi.org/10.4161/spmg.1.3.18018>, PMID: 22319670.

- 944 Kierszenbaum, A.L. & Tres, L.L. 2004. The acrosome-acroplaxome-manchette complex and the  
945 shaping of the spermatid head. *Archives of Histology and Cytology* **67**: 271-284. PMID:  
946 15700535.
- 947 Kierszenbaum, A.L., Tres, L.L., Rivkin, E., Kang-Decker, N. & van Deursen, J.M. 2004. The  
948 acroplaxome is the docking site of golgi-derived myosin va/rab27a/b- containing  
949 proacrosomal vesicles in wild-type and hrb mutant mouse spermatids. *Biology of*  
950 *Reproduction* **70**: 1400-1410. DOI: <https://doi.org/10.1095/biolreprod.103.025346>, PMID:  
951 14724135.
- 952 Kim, K.S., Cha, M.C. & Gerton, G.L. 2001. Mouse sperm protein sp56 is a component of the  
953 acrosomal matrix. *Biology of Reproduction* **64**: 36-43. DOI:  
954 <https://doi.org/10.1095/biolreprod64.1.36>, PMID: 11133656.
- 955 Kim, Y.H., Choi, C.Y., Lee, S.J., Conti, M.A. & Kim, Y. 1998. Homeodomain-interacting protein  
956 kinases, a novel family of co-repressors for homeodomain transcription factors. *Journal of*  
957 *Biological Chemistry* **273**: 25875-25879. DOI: <https://doi.org/10.1074/jbc.273.40.25875>,  
958 PMID: 9748262.
- 959 Kueng, P. *et al.* 1997. A novel family of serine/threonine kinases participating in spermiogenesis.  
960 *Journal of Cell Biology* **139**: 1851-1859. DOI: <https://doi.org/10.1083/jcb.139.7.1851>, PMID:  
961 9412477.
- 962 Lehti, M.S. & Sironen, A. 2016. Formation and function of the manchette and flagellum during  
963 spermatogenesis. *Reproduction* **151**: R43-54. DOI: <https://doi.org/10.1530/REP-15-0310>,  
964 PMID: 26792866.
- 965 Li, W. *et al.* 2015. A meig1/pacrg complex in the manchette is essential for building the sperm  
966 flagella. *Development* **142**: 921-930. DOI: <https://doi.org/10.1242/dev.119834>, PMID:  
967 25715396.

- 968 Li, Y. *et al.* 2017. A nonsense mutation in *ccdc62* gene is responsible for spermiogenesis defects  
969 and male infertility in *repro29/repro29* mice. *Biology of Reproduction* **96**: 587-597. DOI:  
970 <https://doi.org/10.1095/biolreprod.116.141408>, PMID: 28339613.
- 971 Lin, Y. & Kan, F.W. 1996. Regionalization and redistribution of membrane phospholipids and  
972 cholesterol in mouse spermatozoa during *in vitro* capacitation. *Biology of Reproduction* **55**:  
973 1133-1146. DOI: <https://doi.org/10.1095/biolreprod55.5.1133>, PMID: 8902227.
- 974 Litovchick, L., Florens, L.A., Swanson, S.K., Washburn, M.P. & DeCaprio, J.A. 2011. Dyrk1a  
975 protein kinase promotes quiescence and senescence through dream complex assembly.  
976 *Genes & Development* **25**: 801-813. DOI: <https://doi.org/10.1101/gad.2034211>, PMID:  
977 21498570.
- 978 Liu, Y. *et al.* 2015. Lrguk-1 is required for basal body and manchette function during  
979 spermatogenesis and male fertility. *PLoS Genetics* **11**: e1005090. DOI:  
980 <https://doi.org/10.1371/journal.pgen.1005090>, PMID: 25781171.
- 981 Mao, J. *et al.* 2002. Regulation of *gli1* transcriptional activity in the nucleus by *dyrk1*. *Journal of*  
982 *Biological Chemistry* **277**: 35156-35161. DOI: <https://doi.org/10.1074/jbc.M206743200>,  
983 PMID: 12138125.
- 984 Naz, R.K. & Rajesh, P.B. 2004. Role of tyrosine phosphorylation in sperm capacitation /  
985 acrosome reaction. *Reproductive Biology and Endocrinology* **2**: 75. DOI:  
986 <https://doi.org/10.1186/1477-7827-2-75>, PMID: 15535886.
- 987 Nozawa, Y.I., Yao, E., Gacayan, R., Xu, S.M. & Chuang, P.T. 2014. Mammalian fused is essential  
988 for sperm head shaping and periaxonemal structure formation during spermatogenesis.  
989 *Developmental Biology* **388**: 170-180. DOI: <https://doi.org/10.1016/j.ydbio.2014.02.002>,  
990 PMID: 24525297.
- 991 O'Donnell, L. 2014. Mechanisms of spermiogenesis and spermiation and how they are disturbed.  
992 *Spermatogenesis* **4**: e979623. DOI: <https://doi.org/10.4161/21565562.2014.979623>, PMID:  
993 26413397.



- 994 O'Donnell, L. *et al.* 2012. An essential role for katanin p80 and microtubule severing in male  
995 gamete production. *PLoS Genetics* **8**: e1002698. DOI:  
996 <https://doi.org/10.1371/journal.pgen.1002698>, PMID: 22654669.
- 997 O'Rand, M.G. 1982. Modification of the sperm membrane during capacitation. *Annals of the New*  
998 *York Academy of Sciences* **383**: 392-404. DOI: [https://doi.org/10.1111/j.1749-](https://doi.org/10.1111/j.1749-6632.1982.tb23180.x)  
999 [6632.1982.tb23180.x](https://doi.org/10.1111/j.1749-6632.1982.tb23180.x).
- 1000 Pasch, E., Link, J., Beck, C., Scheuerle, S. & Alsheimer, M. 2015. The linc complex component  
1001 sun4 plays a crucial role in sperm head formation and fertility. *Biology Open* **4**: 1792-1802.  
1002 DOI: <https://doi.org/10.1242/bio.015768>, PMID: 26621829.
- 1003 Pasek, R.C. *et al.* 2016. Coiled-coil domain containing 42 (ccdc42) is necessary for proper sperm  
1004 development and male fertility in the mouse. *Developmental Biology* **412**: 208-218. DOI:  
1005 <https://doi.org/10.1016/j.ydbio.2016.01.042>, PMID: 26945718.
- 1006 Pierre, V. *et al.* 2012. Absence of dpy19l2, a new inner nuclear membrane protein, causes  
1007 globozoospermia in mice by preventing the anchoring of the acrosome to the nucleus.  
1008 *Development* **139**: 2955-2965. DOI: <https://doi.org/10.1242/dev.077982>, PMID: 22764053.
- 1009 Rathke, C., Baarends, W.M., Awe, S. & Renkawitz-Pohl, R. 2014. Chromatin dynamics during  
1010 spermiogenesis. *Biochimica et Biophysica Acta* **1839**: 155-168. DOI:  
1011 <https://doi.org/10.1016/j.bbagr.2013.08.004>, PMID: 24091090.
- 1012 Rinaldo, C., Siepi, F., Prodosmo, A. & Soddu, S. 2008. Hipks: Jack of all trades in basic nuclear  
1013 activities. *Biochimica et Biophysica Acta* **1783**: 2124-2129. DOI:  
1014 <https://doi.org/10.1016/j.bbamcr.2008.06.006>, PMID: 18606197.
- 1015 Russell, L., Ettin, R., Sinha Hikim, A. & Clegg, E. *Histological and histopathological evaluation of*  
1016 *the testis*. (Cache River Press, Clearwater, FL; 1990).
- 1017 Sacher, F., Fritsch, M., Feldman, R.I. & Möller, C. (2008) Hip kinase for fertility control. Eur. Pat.  
1018 Appl. EP1889626.

- 1019 Schnabel, D., Ramirez, L., Gertsenstein, M., Nagy, A. & Lomeli, H. 2005. Ectopic expression of  
1020 kitd814y in spermatids of transgenic mice, interferes with sperm morphogenesis.  
1021 *Developmental Dynamics* **233**: 29-40. DOI: <https://doi.org/10.1002/dvdy.20292>, PMID:  
1022 15736269.
- 1023 Sebkova, N., Ded, L., Vesela, K. & Dvorakova-Hortova, K. 2014. Progress of sperm izumo1  
1024 relocation during spontaneous acrosome reaction. *Reproduction* **147**: 231-240. DOI:  
1025 <https://doi.org/10.1530/REP-13-0193>, PMID: 24277869.
- 1026 Sepideh, J. *et al.* 2009. Tyrosine phosphorylation pattern in sperm proteins isolated from  
1027 normospermic and teratospermic men. *Journal of Reproduction & Infertility* **10**: 185-191.  
1028 PMID: 23926467.
- 1029 Shang, P. *et al.* 2010. Functional transformation of the chromatoid body in mouse spermatids  
1030 requires testis-specific serine/threonine kinases. *Journal of Cell Science* **123**: 331-339. DOI:  
1031 <https://doi.org/10.1242/jcs.059949>, PMID: 20053632.
- 1032 Shang, Y. *et al.* 2017. Essential role for sun5 in anchoring sperm head to the tail. *eLife* **6**: DOI:  
1033 <https://doi.org/10.7554/eLife.28199>, PMID: 28945193.
- 1034 Sosnik, J. *et al.* 2009. Tssk6 is required for izumo relocalization and gamete fusion in the mouse.  
1035 *Journal of Cell Science* **122**: 2741-2749. DOI: <https://doi.org/10.1242/jcs.047225>, PMID:  
1036 19596796.
- 1037 Spiridonov, N.A. *et al.* 2005. Identification and characterization of sstk, a serine/threonine protein  
1038 kinase essential for male fertility. *Molecular and Cellular Biology* **25**: 4250-4261. DOI:  
1039 <https://doi.org/10.1128/MCB.25.10.4250-4261.2005>, PMID: 15870294.
- 1040 Sprando, R.L. & Russell, L.D. 1987. Comparative study of cytoplasmic elimination in spermatids  
1041 of selected mammalian species. *American Journal of Anatomy* **178**: 72-80. DOI:  
1042 <https://doi.org/10.1002/aja.1001780109>, PMID: 3825964.

- 1043 Stival, C. *et al.* 2016. Sperm capacitation and acrosome reaction in mammalian sperm. *Advances*  
1044 *in Anatomy, Embryology and Cell Biology* **220**: 93-106. DOI: [https://doi.org/10.1007/978-3-](https://doi.org/10.1007/978-3-319-30567-7_5)  
1045 [319-30567-7\\_5](https://doi.org/10.1007/978-3-319-30567-7_5), PMID: 27194351.
- 1046 Tuttelmann, F., Ruckert, C. & Ropke, A. 2018. Disorders of spermatogenesis: Perspectives for  
1047 novel genetic diagnostics after 20 years of unchanged routine. *Medizinische Genetik* **30**: 12-  
1048 20. DOI: <https://doi.org/10.1007/s11825-018-0181-7>, PMID: 29527098.
- 1049 van der Laden, J., Soppa, U. & Becker, W. 2015. Effect of tyrosine autophosphorylation on  
1050 catalytic activity and subcellular localisation of homeodomain-interacting protein kinases  
1051 (hipk). *Cell Communication and Signaling* **13**: 3. DOI: [https://doi.org/10.1186/s12964-014-](https://doi.org/10.1186/s12964-014-0082-6)  
1052 [0082-6](https://doi.org/10.1186/s12964-014-0082-6), PMID: 25630557.
- 1053 Wang, X. *et al.* 2016. Testis-specific serine/threonine protein kinase 4 (tssk4) phosphorylates  
1054 odf2 at ser-76. *Science Reports* **6**: 22861. DOI: <https://doi.org/10.1038/srep22861>, PMID:  
1055 26961893.
- 1056 Wang, X. *et al.* 2015. Tssk4 is essential for maintaining the structural integrity of sperm flagellum.  
1057 *Molecular Human Reproduction* **21**: 136-145. DOI: <https://doi.org/10.1093/molehr/gau097>,  
1058 PMID: 25361759.
- 1059 Wong, E.W., Mruk, D.D. & Cheng, C.Y. 2008. Biology and regulation of ectoplasmic  
1060 specialization, an atypical adherens junction type, in the testis. *Biochimica et Biophysica*  
1061 *Acta* **1778**: 692-708. DOI: <https://doi.org/10.1016/j.bbamem.2007.11.006>, PMID: 18068662.
- 1062 Woods, Y.L. *et al.* 2001. The kinase dyrk1a phosphorylates the transcription factor fkhr at ser329  
1063 in vitro, a novel in vivo phosphorylation site. *Biochemical Journal* **355**: 597-607. DOI:  
1064 <https://doi.org/10.1042/bj3550597>, PMID: 11311120.
- 1065 Wu, J.Y. *et al.* 2000. Spermiogenesis and exchange of basic nuclear proteins are impaired in  
1066 male germ cells lacking camk4. *Nature Genetics* **25**: 448-452. DOI:  
1067 <https://doi.org/10.1038/78153>, PMID: 10932193.

- 1068 Xiao, N. *et al.* 2009. Pick1 deficiency causes male infertility in mice by disrupting acrosome  
1069 formation. *Journal of Clinical Investigation* **119**: 802-812. DOI:  
1070 <https://doi.org/10.1172/JCI36230>, PMID: 19258705.
- 1071 Xu, B. *et al.* 2008. Targeted deletion of tssk1 and 2 causes male infertility due to  
1072 haploinsufficiency. *Developmental Biology* **319**: 211-222. DOI:  
1073 <https://doi.org/10.1016/j.ydbio.2008.03.047>, PMID: 18533145.
- 1074 Yan, W. 2009. Male infertility caused by spermiogenic defects: Lessons from gene knockouts.  
1075 *Molecular and Cellular Endocrinology* **306**: 24-32. DOI:  
1076 <https://doi.org/10.1016/j.mce.2009.03.003>, PMID: 19481682.
- 1077 Yang, E.J., Ahn, Y.S. & Chung, K.C. 2001. Protein kinase dyrk1 activates camp response  
1078 element-binding protein during neuronal differentiation in hippocampal progenitor cells.  
1079 *Journal of Biological Chemistry* **276**: 39819-39824. DOI:  
1080 <https://doi.org/10.1074/jbc.M104091200>, PMID: 11518709.
- 1081 Yao, R. *et al.* 2002. Lack of acrosome formation in mice lacking a golgi protein, gopc. *PNAS* **99**:  
1082 11211-11216. DOI: <https://doi.org/10.1073/pnas.162027899>, PMID: 12149515.
- 1083 Yoshida, N. & Perry, A.C. 2007. Piezo-actuated mouse intracytoplasmic sperm injection (icsi).  
1084 *Nature Protocols* **2**: 296-304. DOI: <https://doi.org/10.1038/nprot.2007.7>, PMID: 17406589.
- 1085 Zakrzewski, P., Lenartowski, R., Redowicz, M.J., Miller, K.G. & Lenartowska, M. 2017.  
1086 Expression and localization of myosin vi in developing mouse spermatids. *Histochemistry*  
1087 *and Cell Biology* **148**: 445-462. DOI: <https://doi.org/10.1007/s00418-017-1579-z>, PMID:  
1088 28500503.
- 1089 Zheng, H. *et al.* 2007. Lack of spem1 causes aberrant cytoplasm removal, sperm deformation,  
1090 and male infertility. *PNAS* **104**: 6852-6857. DOI: <https://doi.org/10.1073/pnas.0701669104>,  
1091 PMID: 17426145.
- 1092 Zhou, J. *et al.* 2009. Rim-bp3 is a manchette-associated protein essential for spermiogenesis.  
1093 *Development* **136**: 373-382. DOI: <https://doi.org/10.1242/dev.030858>, PMID: 19091768.





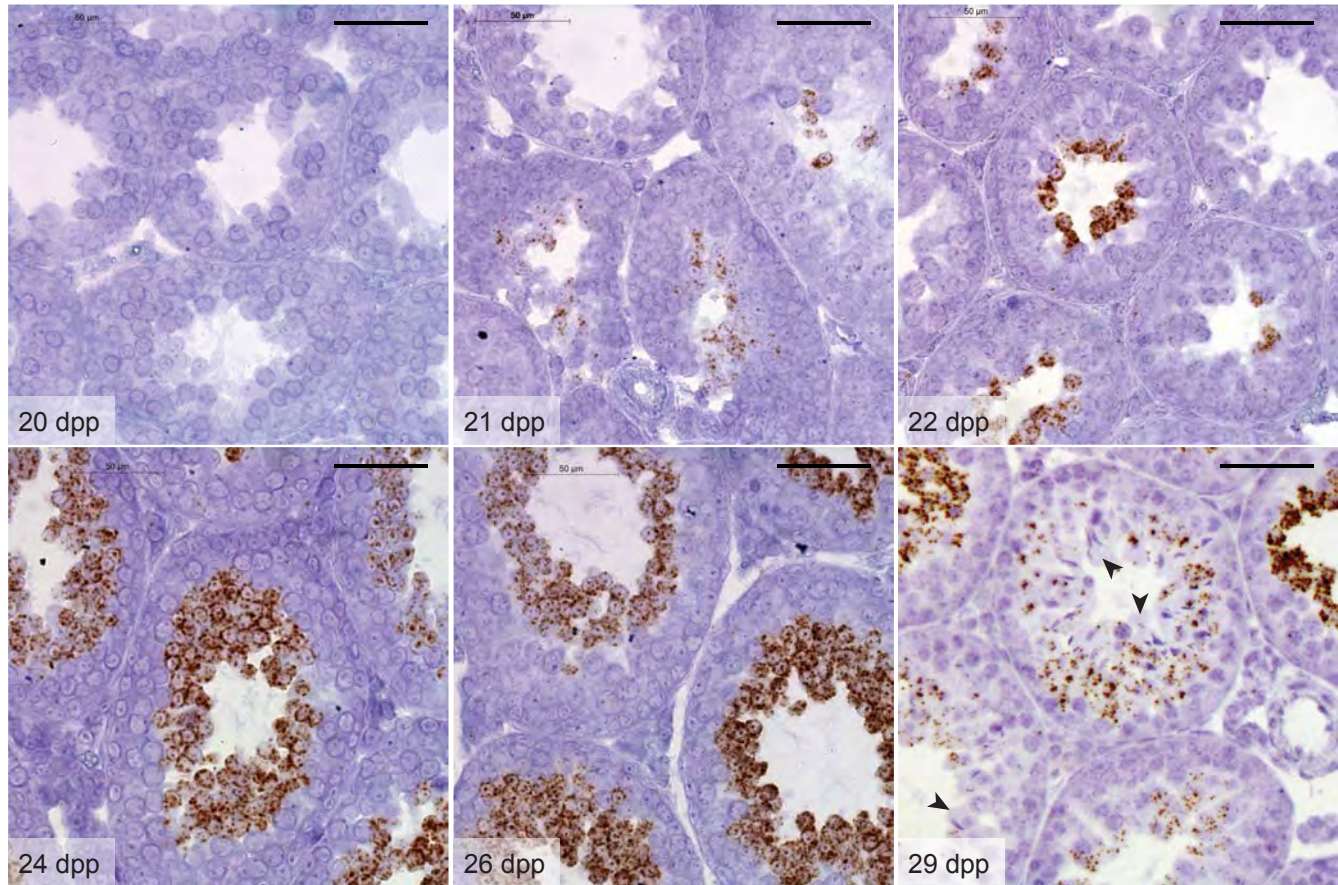

**Figure 2 – figure supplement 1. *Hipk4* mRNA expression during the first wave of murine spermatogenesis.** *Hipk4* transcript labeling by *in situ* hybridization in formalin-fixed, paraffin-embedded testis sections from wild-type C57BL/6NJ mice of the designated ages. Arrowheads indicate the loss of *Hipk4* expression in elongating spermatids circumscribing the seminiferous tubule lumen (29 dpp). Scale bars: 50 μm.



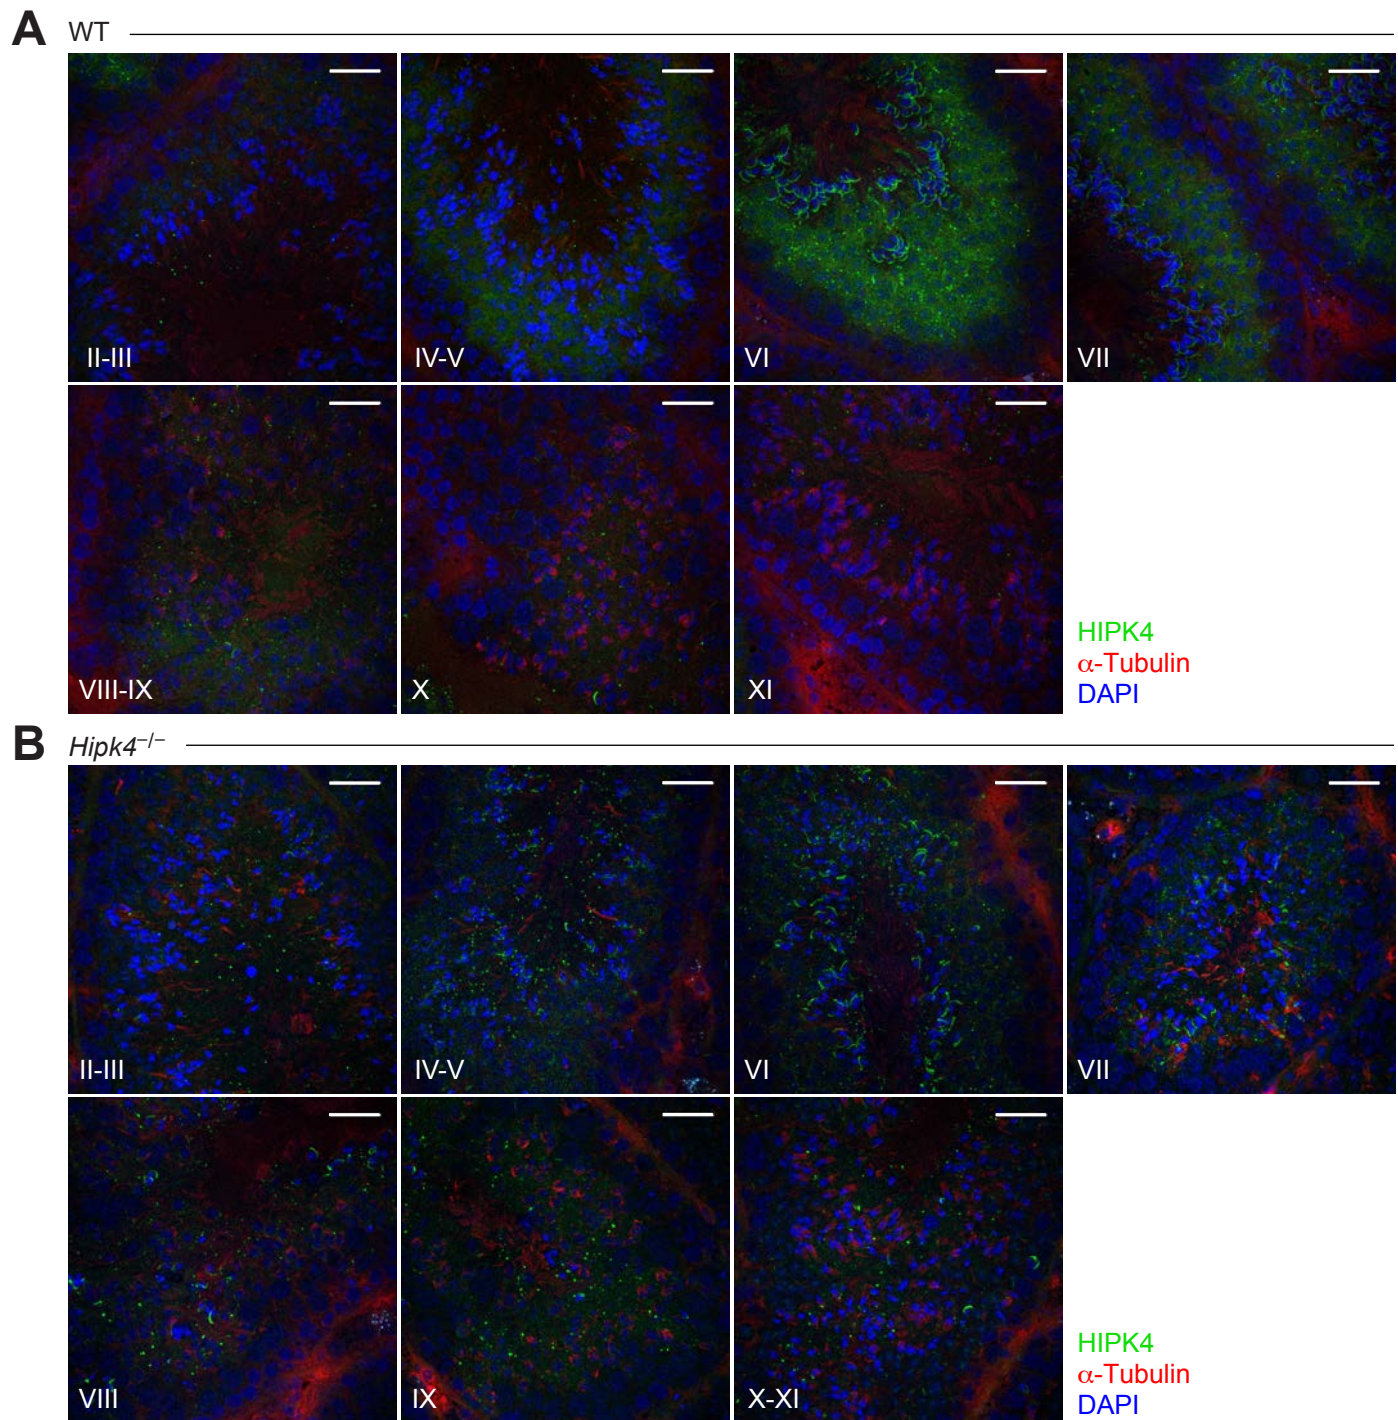

**Figure 2 – figure supplement 2. HIPK4 protein expression in adult murine seminiferous tubules.** (A-B) Immunofluorescence images of cryosectioned testes from adult wild-type (A) and *Hipk4* knockout (B) mice. Stages for each testis section are shown. Scale bars: 20  $\mu$ m.

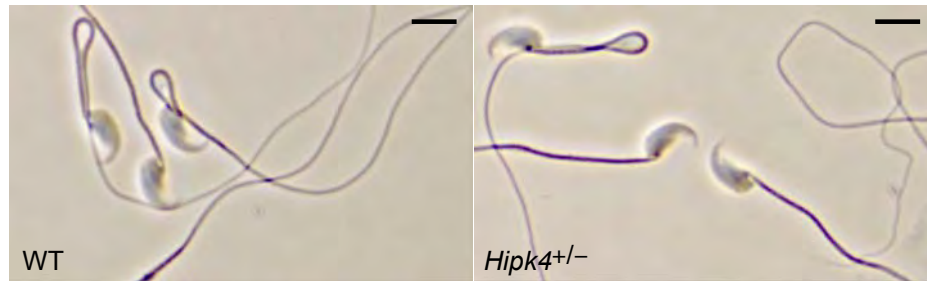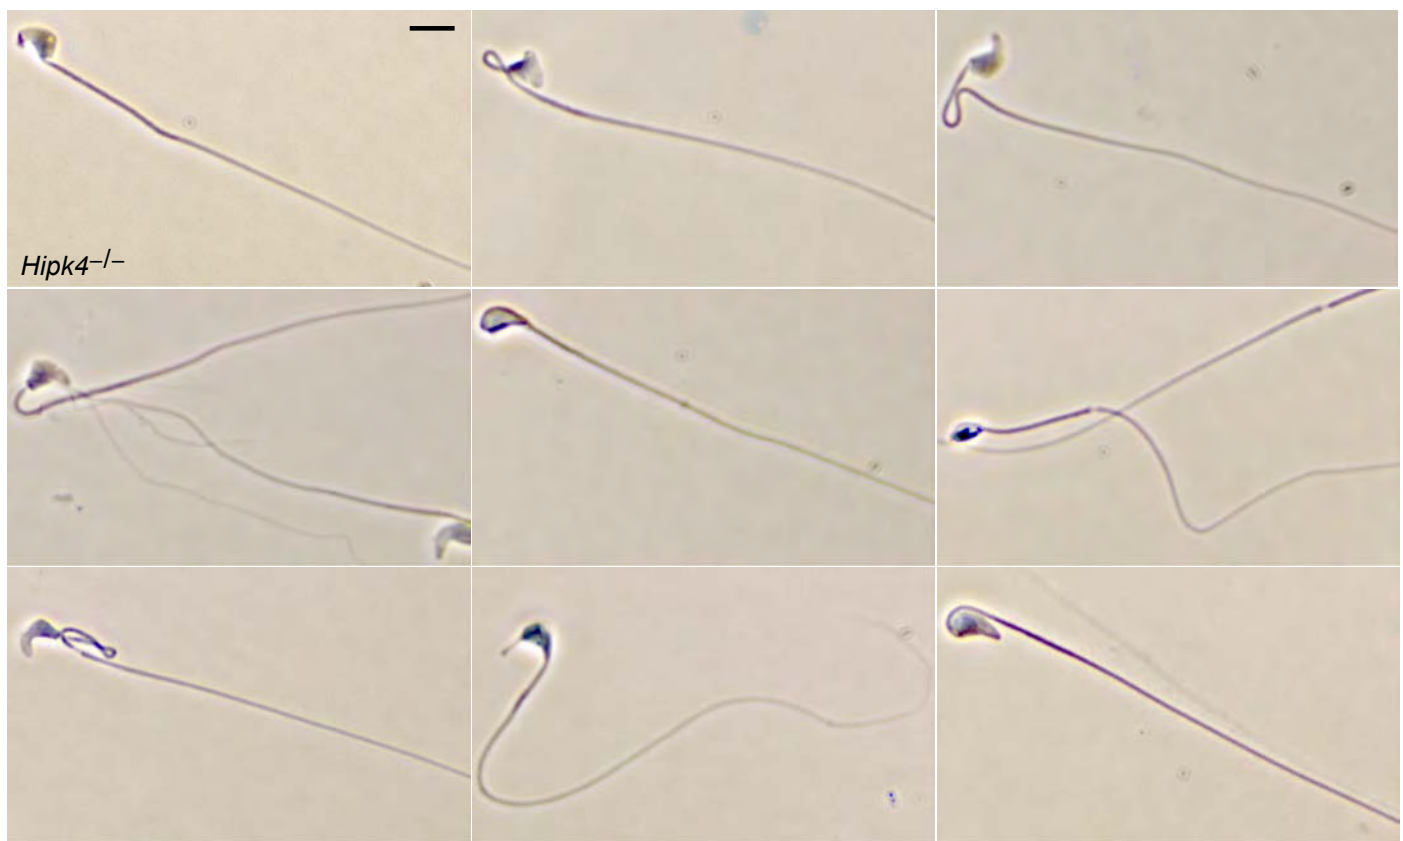

**Figure 3 – figure supplement 1. Morphologies of wild-type and *Hipk4* mutant sperm.** Phase contrast images of sperm obtained from mice with the designated genotypes. Sperm were treated with Diff-Quik stain prior to imaging, and multiple examples of homozygous mutant sperm are shown to illustrate the range of morphological phenotypes. Scale bars: 2  $\mu$ m.

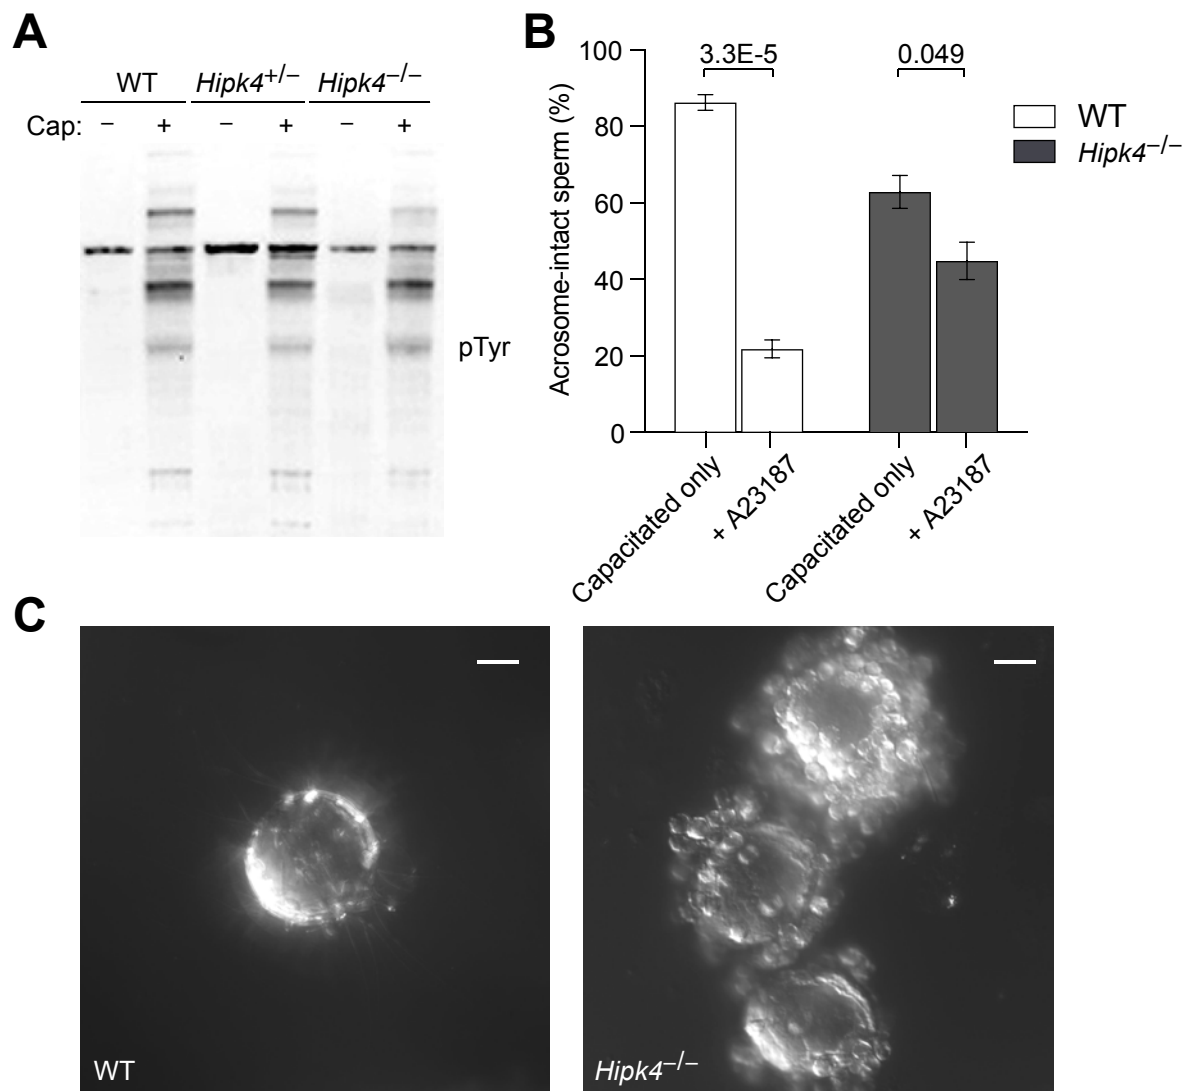

**Figure 3 – figure supplement 2. HIPK4 is not essential for sperm capacitation or acrosomal exocytosis.** (A) Western blot detection of soluble phosphotyrosine-containing proteins in sperm before or after capacitation with TYH medium + BSA (Cap buffer). (B) Percentage of wild-type or *Hipk4* knock out sperm with an acrosome after treatment with Cap buffer for 1.5 hours or after an additional 1-hour incubation with either the Ca<sup>2+</sup> ionophore A23187. Data are the average of three independent experiments  $\pm$  s.e.m., and the number of sperm counted for each condition was between 213-1228. *P*-values (T-test; two-tailed, equal variance) are shown. (C) Representative differential interference contrast (DIC) images of oocytes following standard IVF conditions using wild-type or *Hipk4* knock out sperm. Scale bars = 20  $\mu$ m



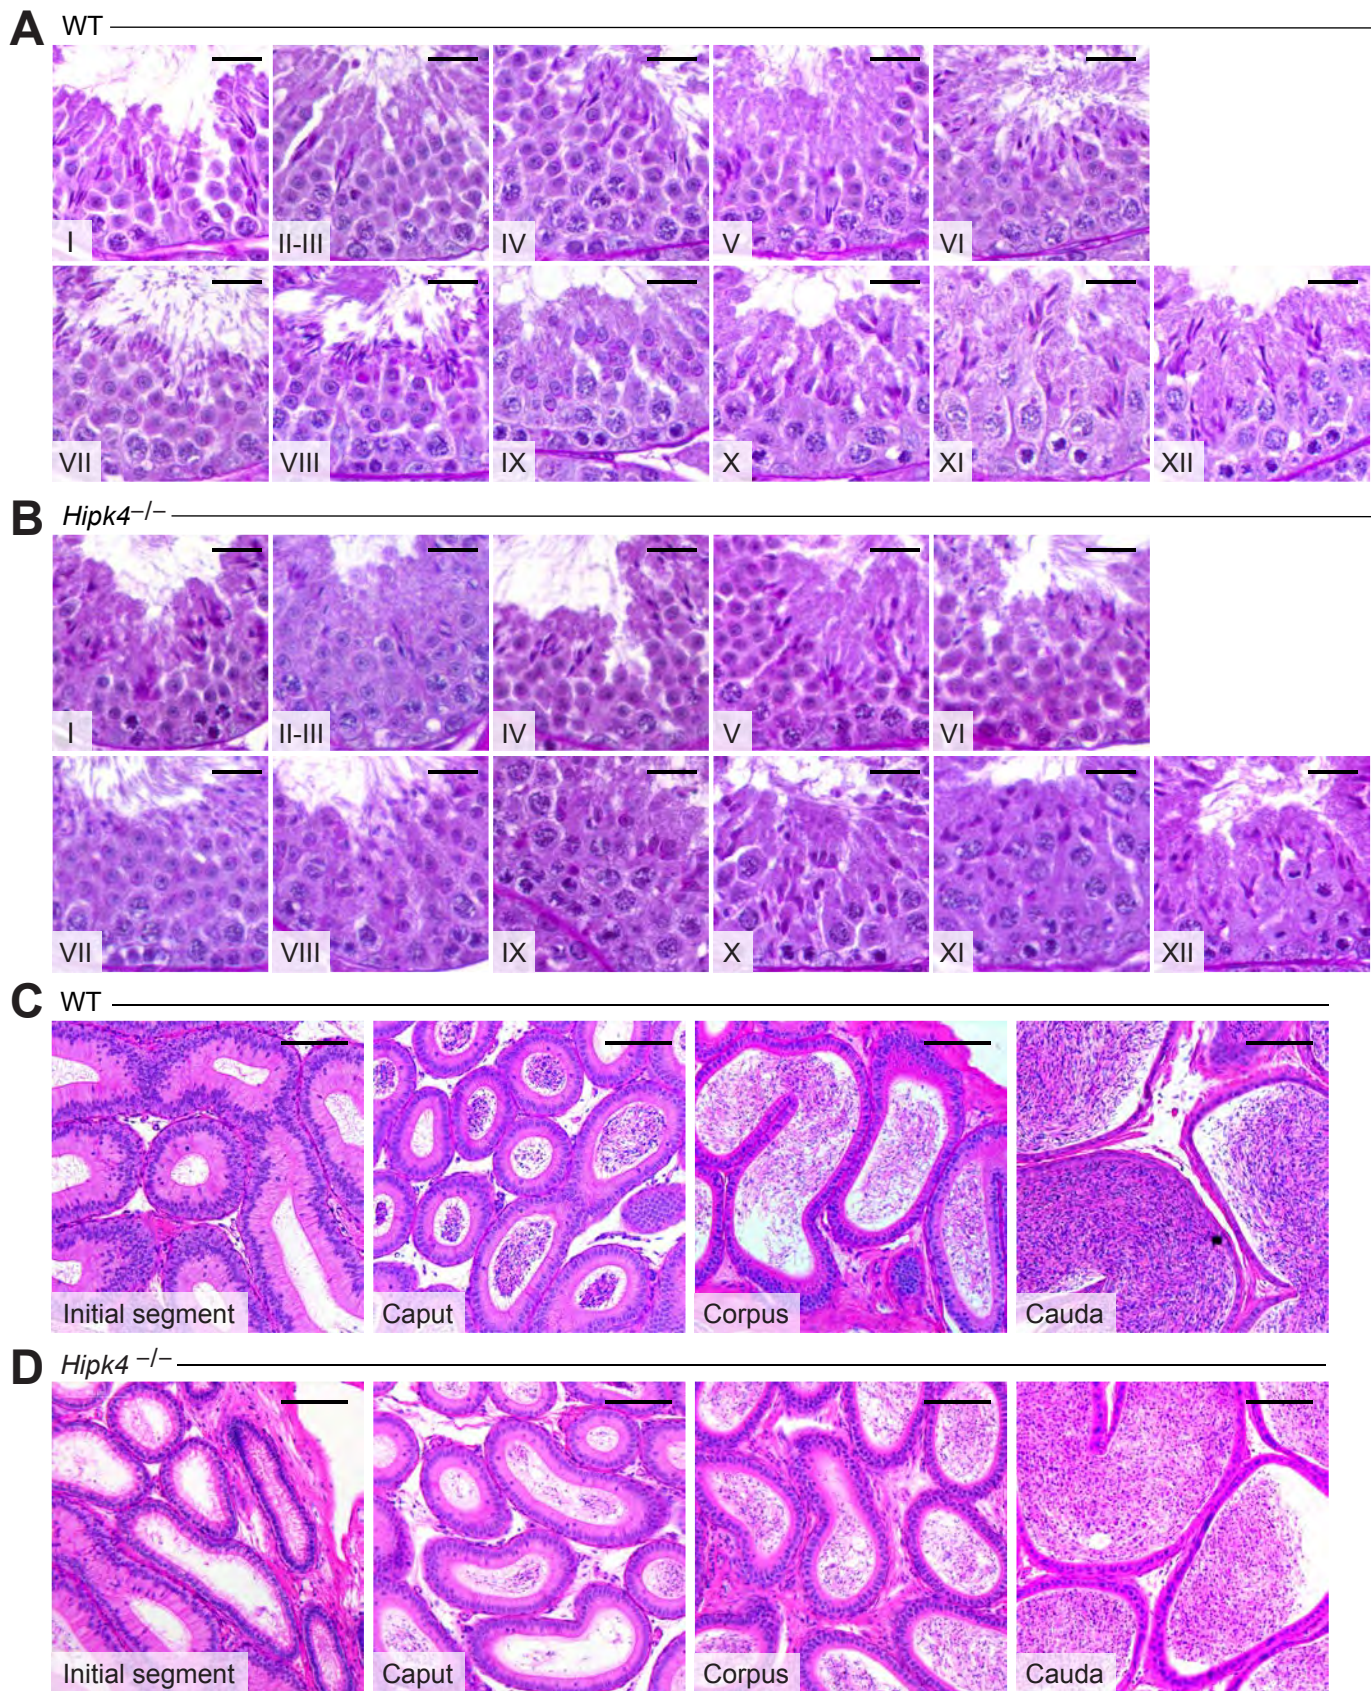

**Figure 4 – figure supplement 1. Comparison of the seminiferous epithelium and epididymis of WT and *Hipk4* knockout mice.** (A-B) Fixed, paraffin-embedded testis sections from WT (A) and *Hipk4*<sup>-/-</sup> (B) mice stained with PAS reagents. Stages for the tubules shown in each micrograph are indicated. (C-D) Fixed, paraffin-embedded epididymis sections from WT (C) and *Hipk4*<sup>-/-</sup> (D) mice stained with hematoxylin and eosin. Epididymal regions associated with each section are indicated. Scale bars: 20  $\mu$ m.



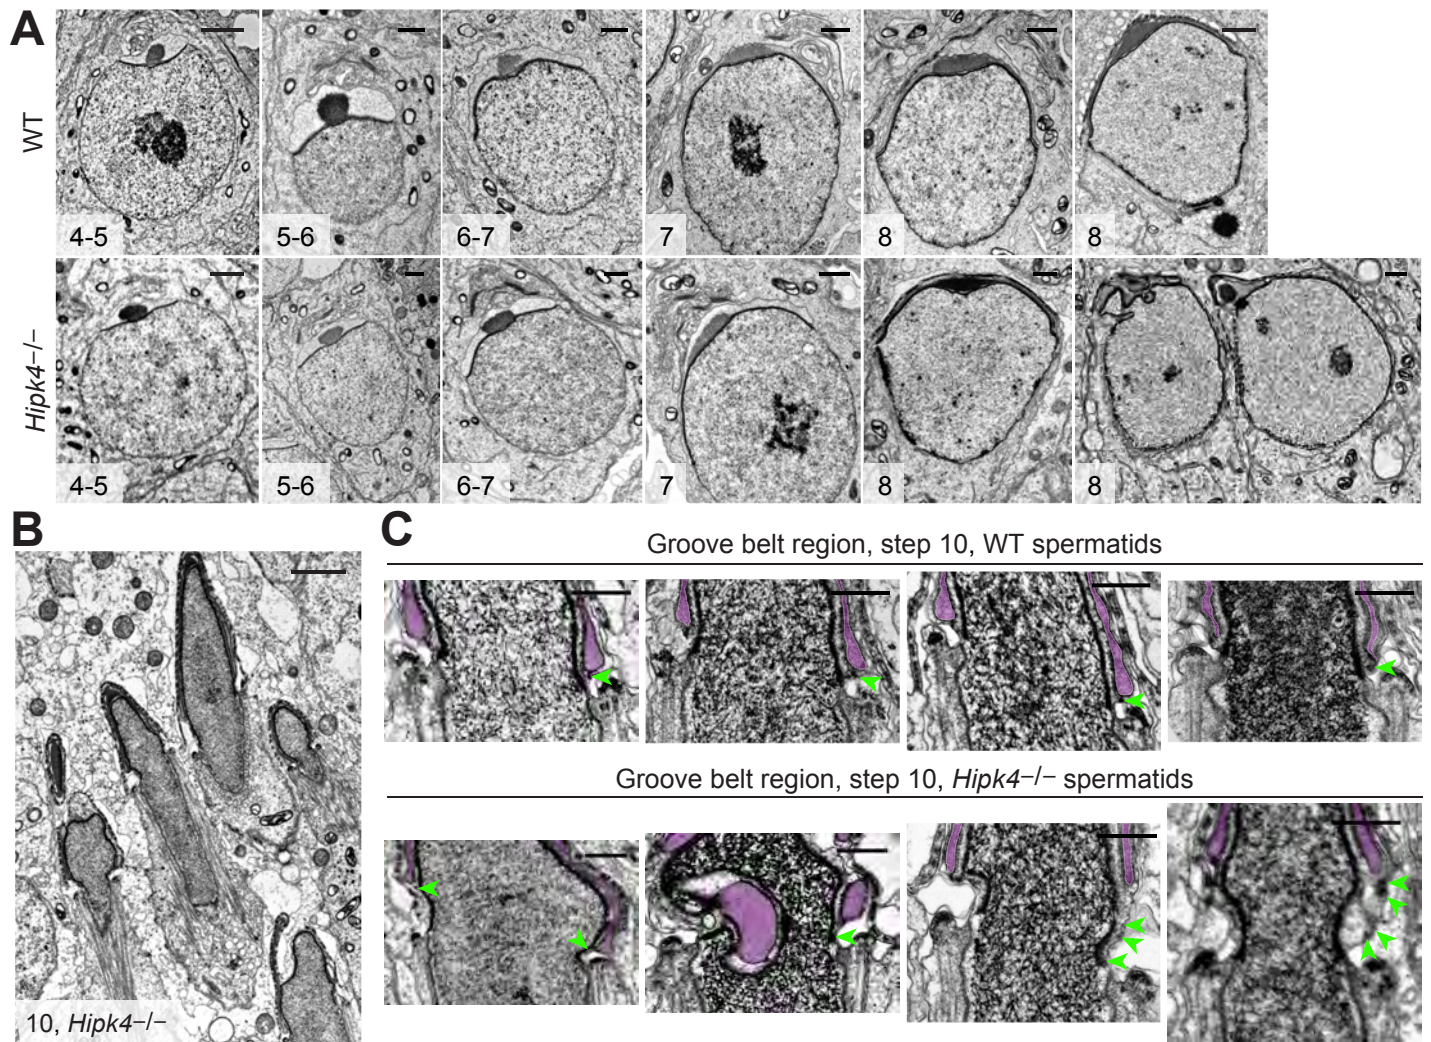

**Figure 4 - figure supplement 2. HIPK4 null spermatids exhibit acrosome-acroplaxome defects.** (A) TEM images of step 4-8 spermatids from adult WT and *Hipk4*<sup>-/-</sup> mice. (B) TEM images of step 10 *Hipk4*<sup>-/-</sup> spermatids. (C) Higher magnification TEM images of the groove belt region in step 10 WT and *Hipk4*<sup>-/-</sup> spermatids. Acrosomes are false-colored purple, and green arrowheads label electron densities in the acroplaxome that normally are associated with the acrosome or plasma membrane. Scale bars: A, 1  $\mu$ m; B, 2  $\mu$ m; C, 1  $\mu$ m.

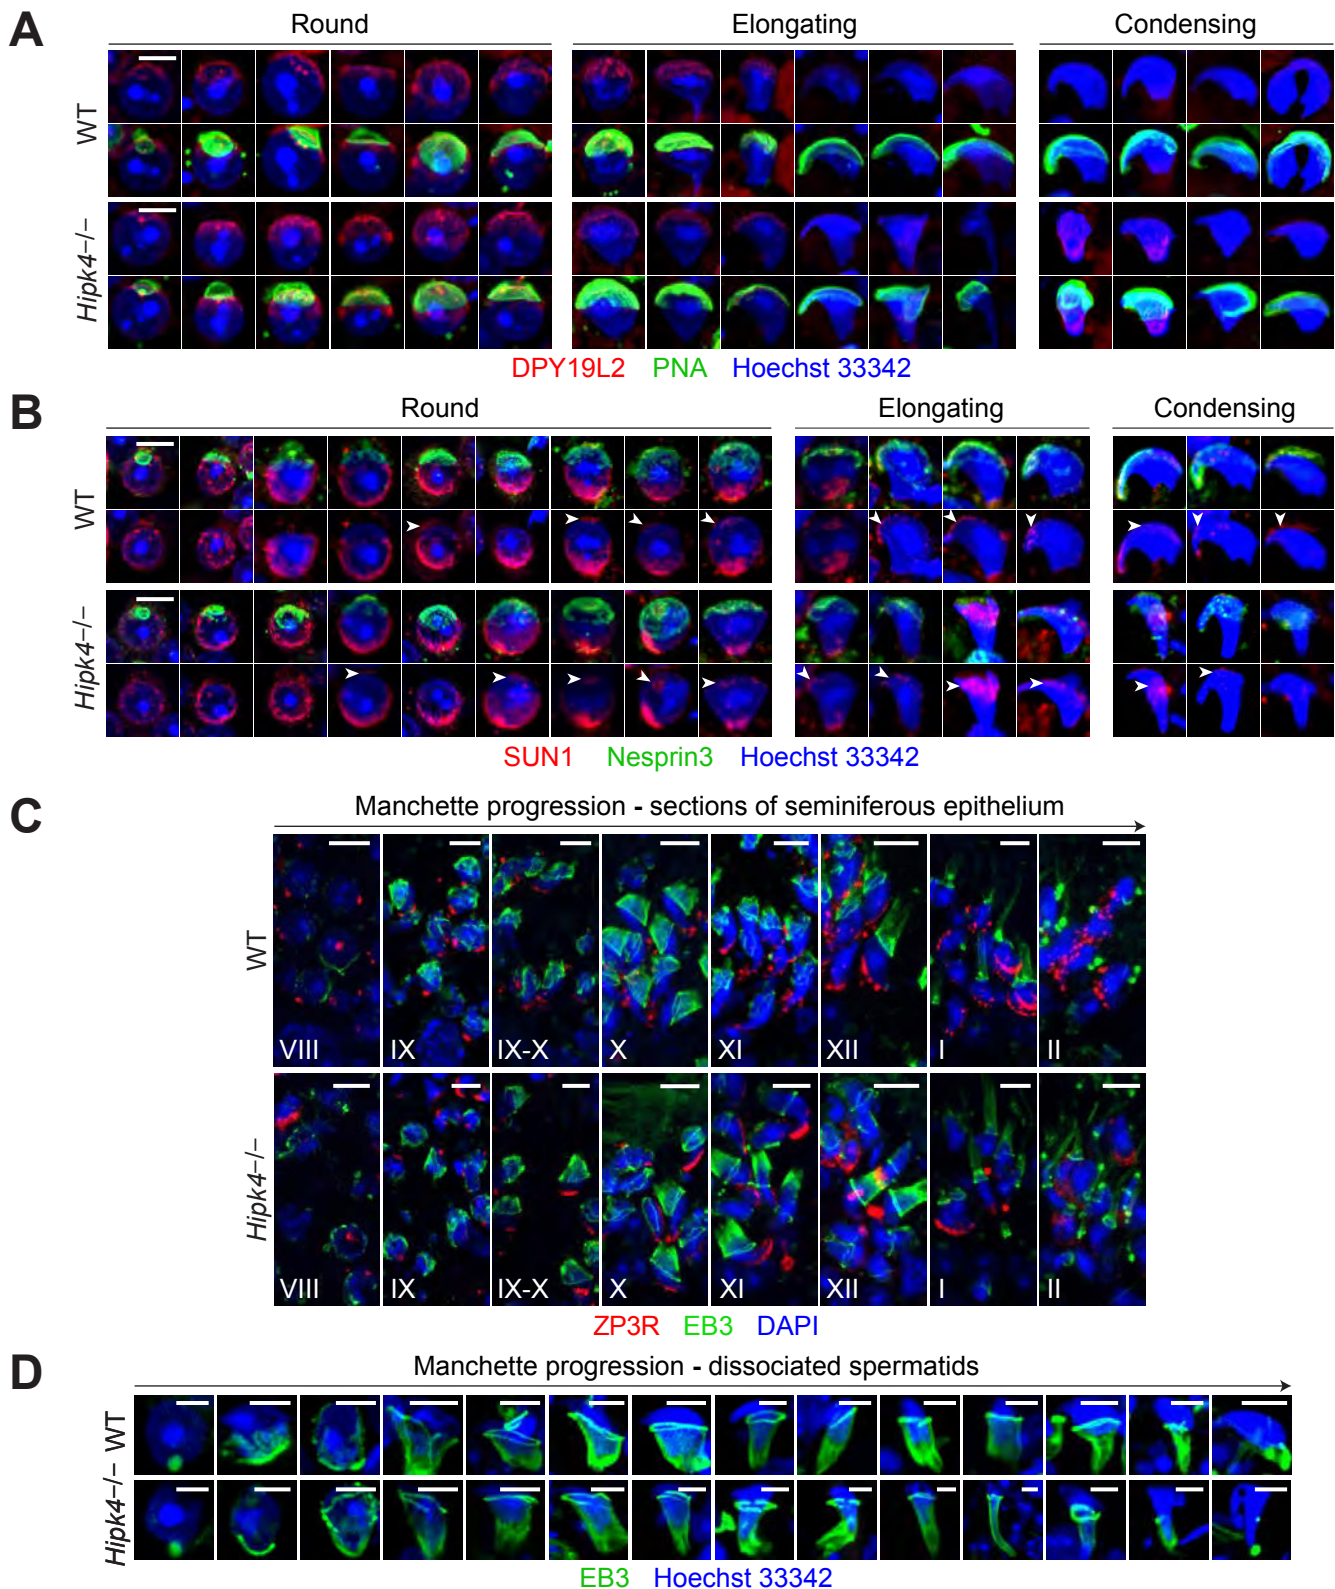

**Figure 4 - figure supplement 3. HIPK4 does not regulate the localization of anterior LINC complexes or manchette dynamics.** (A) Immunofluorescence imaging of the inner nuclear membrane protein DPY19L2 (red) in dissociated spermatids. The acrosome is labeled with FITC-PNA (green), and nuclei are stained with Hoechst 33342 (blue). (B) Immunofluorescence imaging of the LINC complex proteins SUN1 (red) and nesprin3 (green) in dissociated spermatids. Nuclei are stained with Hoechst 33342 (blue). (C) Immunofluorescence imaging of EB3 (green) and ZP3R (red) in testis cryosections. Nuclei are stained with DAPI, and stages of each section are indicated. (D) Immunofluorescence imaging of EB3 (green) in dissociated spermatids. Nuclei are stained with Hoechst 33342 (blue). Scale bars: A-B (scale bars are representative for all images across the row), 2  $\mu$ m; C, 5  $\mu$ m; D, 2  $\mu$ m.
