# Supplementary material for: HIPK4 is essential for murine spermiogenesis
Source: bioRxiv preprint, doi:10.1101/703637, version 1 (2019-07-16)
Supplement: Figure 5 – source data 1 [file 703637_file03.xlsx]

## Sheet: All genes
#%result_name=HIPK4 KO testis_1		65956 genes detected
#%array_type=MTA-1_0
#%annotation=MTA-1_0.na36.mm10.transcript.csv
#%comparison=hipk4 -/- vs WT
ID	hipk4 -/- Avg (log2)	WT Avg (log2)	Fold Change	P-val	FDR P-val	Gene Symbol	Description	Group
TC0M00000012.mm.1	9.12	12.4	-9.69	0.0582	0.2476	mt-Tr	mitochondrially encoded tRNA arginine [Source:MGI Symbol;Acc:MGI:102476]	tRNA
TC0M00000015.mm.1	6.85	9.99	-8.83	0.0607	0.2532	mt-Ts2; mt-Tl2	mitochondrially encoded tRNA serine 2 [Source:MGI Symbol;Acc:MGI:102474]; mitochondrially encoded tRNA leucine 2 [Source:MGI Symbol;Acc:MGI:102481]	tRNA
TC0700000462.mm.1	5.72	8.82	-8.57	7.67e-16	5.06e-11	Hipk4	homeodomain interacting protein kinase 4	Coding
TC1000002929.mm.1	8.36	11.34	-7.89	0.0065	0.0706	Lyz2	lysozyme 2	Coding
TC1000002669.mm.1	8.46	11.41	-7.68	0.0161	0.1205	Gm24119	predicted gene, 24119 [Source:MGI Symbol;Acc:MGI:5453896]	Small_RNA
TC1500001107.mm.1	9.62	12.54	-7.58	0.1748	0.4453	Rpl39-ps	ribosomal protein L39, pseudogene	Multiple_Complex
TC0M00000017.mm.1	5.45	8.35	-7.47	0.1038	0.339	mt-Tt	mitochondrially encoded tRNA threonine [Source:MGI Symbol;Acc:MGI:102473]	tRNA
TC0500003389.mm.1	8.77	11.64	-7.31	0.0123	0.1027	Gm25492	predicted gene, 25492 [Source:MGI Symbol;Acc:MGI:5455269]	Small_RNA
TC0400001396.mm.1	9.12	11.98	-7.31	0.0147	0.1146	Gm25788	predicted gene, 25788 [Source:MGI Symbol;Acc:MGI:5455565]	Small_RNA
TC0M00000021.mm.1	7.41	10.22	-7.04	0.0258	0.1575	mt-Ta	mitochondrially encoded tRNA alanine [Source:MGI Symbol;Acc:MGI:102491]	tRNA
TC0700001613.mm.1	7.17	9.97	-6.99	0.038	0.1947	Gm24888	predicted gene, 24888 [Source:MGI Symbol;Acc:MGI:5454665]	Small_RNA
TC0M00000008.mm.1	8.48	11.28	-6.96	0.0263	0.1593	mt-Tk	mitochondrially encoded tRNA lysine [Source:MGI Symbol;Acc:MGI:102483]	tRNA
TC0100000826.mm.1	9.97	12.72	-6.7	0.1829	0.4555	Scarna6	small Cajal body-specific RNA 6	Small_RNA
TC0700000788.mm.1	9.43	12.17	-6.7	0.0003	0.0095	Klk1b27	kallikrein 1-related peptidase b27	Coding
TC0M00000022.mm.1	10.15	12.87	-6.58	0.0118	0.1004	mt-Tn	mitochondrially encoded tRNA asparagine [Source:MGI Symbol;Acc:MGI:102479]	tRNA
TC0800001302.mm.1	12.54	15.23	-6.47	0.2526	0.5355	Snord71	small nucleolar RNA, C/D box 71	Small_RNA
TC1100001783.mm.1	11.39	14.08	-6.42	0.0829	0.2999	Snord104	small nucleolar RNA, C/D box 104	Small_RNA
TC1100003057.mm.1	10.3	12.97	-6.37	0.0388	0.1969	Gm25835	predicted gene, 25835 [Source:MGI Symbol;Acc:MGI:5455612]	Small_RNA
TC1500002177.mm.1	9.99	12.66	-6.34	0.0044	0.0559	Snora34; Mir1291	small nucleolar RNA, H/ACA box 34; microRNA 1291	Multiple_Complex
TC1100004019.mm.1	10.48	13.12	-6.23	0.107	0.3442			NonCoding
TC0400003364.mm.1	12.84	15.46	-6.14	0.0706	0.275	Snord55	small nucleolar RNA, C/D box 55	Small_RNA
TC0800000135.mm.1	8.66	11.25	-6.05	0.0108	0.0953	Gm24698	predicted gene, 24698 [Source:MGI Symbol;Acc:MGI:5454475]	Small_RNA
TC0M00000014.mm.1	11.35	13.94	-6.04	0.0444	0.2126	mt-Th	mitochondrially encoded tRNA histidine [Source:MGI Symbol;Acc:MGI:102485]	tRNA
TC0M00000030.mm.1	10.11	12.67	-5.91	0.0895	0.313			NonCoding
TC0700000790.mm.1	7.98	10.54	-5.88	0.0084	0.0819	Klk1b22	kallikrein 1-related peptidase b22	Coding
TC0700000789.mm.1	10.45	13	-5.87	0.0006	0.0149	Klk1b21	kallikrein 1-related peptidase b21	Coding
TC0400001397.mm.1	7.75	10.28	-5.79	0.0149	0.1153	Gm22154	predicted gene, 22154 [Source:MGI Symbol;Acc:MGI:5451931]	Small_RNA
TC0900001597.mm.1	7.18	9.71	-5.77	0.0255	0.1562	Gm26448	predicted gene, 26448 [Source:MGI Symbol;Acc:MGI:5456225]	Small_RNA
TC0M00000020.mm.1	6.79	9.31	-5.77	0.0933	0.3205	mt-Tq	mitochondrially encoded tRNA glutamine [Source:MGI Symbol;Acc:MGI:102477]	tRNA
TC1100002250.mm.1	9.9	12.41	-5.7	0.1862	0.4599	Gm12013	predicted gene 12013 [Source:MGI Symbol;Acc:MGI:3651371]	Pseudogene
TC0X00003147.mm.1	9.22	11.73	-5.7	0.032	0.1778	Gm25107	predicted gene, 25107 [Source:MGI Symbol;Acc:MGI:5454884]	Small_RNA
TC0700002993.mm.1	11.09	13.59	-5.67	0.0257	0.1572	Snord35a	small nucleolar RNA, C/D box 35A	Small_RNA
TSUnmapped00000176.mm.1	9.55	12.05	-5.65	0.0398	0.2	Snora73b	small nucleolar RNA, H/ACA box 73b	Small_RNA
TC0200000458.mm.1	8.67	11.16	-5.6	0.1159	0.3587	Gm23969	predicted gene, 23969 [Source:MGI Symbol;Acc:MGI:5453746]	Small_RNA
TC0400003669.mm.1	9.93	12.4	-5.55	0.04	0.2005	Snora73b	small nucleolar RNA, H/ACA box 73b	Small_RNA
TC0700000792.mm.1	10.63	13.09	-5.5	0.0004	0.0114	Klk1b24	kallikrein 1-related peptidase b24	Coding
TC1600000289.mm.1	7.59	10.04	-5.5	0.0526	0.2341	Snord66	small nucleolar RNA, C/D box 66	Small_RNA
TC1500001135.mm.1	8.04	10.46	-5.35	0.1193	0.3642	Ccdc152	coiled-coil domain containing 152	Coding
TC0700003799.mm.1	8.16	10.57	-5.34	0.1095	0.3487	Snord15a	small nucleolar RNA, C/D box 15A	Small_RNA
TC1400002028.mm.1	9.92	12.33	-5.31	0.1134	0.3544	Snord8	small nucleolar RNA, C/D box 8	Small_RNA
TSUnmapped00000177.mm.1	9.9	12.28	-5.2	0.0419	0.206	Snora73a	small nucleolar RNA, H/ACA box 73a	Small_RNA
TC0X00002058.mm.1	6.34	8.72	-5.19	0.0202	0.1369	Snora69	small nucleolar RNA, H/ACA box 69	Small_RNA
TC0200001973.mm.1	11.7	14.07	-5.17	0.0072	0.0751	Snord110	small nucleolar RNA, C/D box 110	Small_RNA
TC1300001923.mm.1	6.65	9	-5.09	0.0197	0.1347	Gm24620	predicted gene, 24620 [Source:MGI Symbol;Acc:MGI:5454397]	Small_RNA
TC1300000569.mm.1	9.14	11.49	-5.09	0.0062	0.0684	Ogn	osteoglycin	Coding
TC1400000567.mm.1	11.45	13.79	-5.06	0.1326	0.3852			NonCoding
TC0100000825.mm.1	8.67	11.01	-5.05	0.1713	0.4411	Gm25395	predicted gene, 25395 [Source:MGI Symbol;Acc:MGI:5455172]	Small_RNA
TC0600001862.mm.1	8.04	10.37	-5.03	0.1056	0.3418	Ndufa4	NADH dehydrogenase (ubiquinone) 1 alpha subcomplex, 4	Coding
TC0100002238.mm.1	8.2	10.53	-4.99	0.074	0.2819	Snord89	small nucleolar RNA, C/D box 89	Small_RNA
TC0500001513.mm.1	12.73	15.05	-4.99	0.0029	0.0429	Gm23245	predicted gene, 23245 [Source:MGI Symbol;Acc:MGI:5453022]	Small_RNA
TC0300001100.mm.1	9.35	11.66	-4.96	0.2721	0.5548	Gm4540	predicted gene 4540 [Source:MGI Symbol;Acc:MGI:3782724]	Coding
TC0X00002273.mm.1	13.25	15.55	-4.92	0.0187	0.1313	Snord61	small nucleolar RNA, C/D box 61	Small_RNA
TSUnmapped00000178.mm.1	7.59	9.87	-4.86	0.0192	0.1328	Snord14e	small nucleolar RNA, C/D box 14E	Small_RNA
TC1700001951.mm.1	7.48	9.76	-4.86	0.0687	0.2709	Gm23442	predicted gene, 23442 [Source:MGI Symbol;Acc:MGI:5453219]	Small_RNA
TCUn_GL45638200000001.mm.1	12.98	15.25	-4.85	0.1602	0.4256			NonCoding
TC0600003137.mm.1	11.07	13.3	-4.71	0.1001	0.3324	Scarna10	small Cajal body-specific RNA 10	Multiple_Complex
TSUnmapped00000186.mm.1	11.14	13.36	-4.67	0.0154	0.1179	Rnu3a	U3A small nuclear RNA	Small_RNA
TC1700000418.mm.1	9.88	12.1	-4.67	0.0834	0.3012	Atp6v0e	ATPase, H+ transporting, lysosomal V0 subunit E	Coding
TC0100003672.mm.1	9.86	12.05	-4.57	0.2826	0.565	Gm20305	PREDICTED: predicted gene, 20305 (Gm20305), mRNA.	Coding
TC0200004759.mm.1	12.84	15.04	-4.57	0.0309	0.1743	Snord17	small nucleolar RNA, C/D box 17	Small_RNA
TC0500001963.mm.1	12.83	15.02	-4.57	0.0185	0.1304	Gm10108	predicted pseudogene 10108 [Source:MGI Symbol;Acc:MGI:3642431]	Pseudogene
TC0500001427.mm.1	8.36	10.55	-4.56	0.2615	0.5446	Gm19601	PREDICTED: predicted gene, 19601 (Gm19601), mRNA.	Coding
TC0200004100.mm.1	12.24	14.43	-4.56	0.0221	0.1433	Gm13772	predicted gene 13772 [Source:MGI Symbol;Acc:MGI:3650155]	Multiple_Complex
TC1400002597.mm.1	10.03	12.22	-4.54	0.1941	0.4699	Rpl36a-ps1	ribosomal protein L36A, pseudogene 1 [Source:MGI Symbol;Acc:MGI:3642585]	Multiple_Complex
TC0300003172.mm.1	11.02	13.2	-4.51	0.0253	0.1556	Gm24494	predicted gene, 24494 [Source:MGI Symbol;Acc:MGI:5454271]	Small_RNA
TC0700001388.mm.1	11.67	13.84	-4.5	0.0112	0.0973	n-R5s156	nuclear encoded rRNA 5S 156 [Source:MGI Symbol;Acc:MGI:4422019]	Ribosomal
TC0200002581.mm.1	9.93	12.1	-4.49	0.0067	0.072	Gm23201	predicted gene, 23201 [Source:MGI Symbol;Acc:MGI:5452978]	Small_RNA
TC0400001583.mm.1	10.21	12.38	-4.48	0.0003	0.0108	Snora16a	small nucleolar RNA, H/ACA box 16A	Small_RNA
TC1200002153.mm.1	13.13	15.29	-4.48	0.0086	0.0833	Gm25776	predicted gene, 25776 [Source:MGI Symbol;Acc:MGI:5455553]	Small_RNA
TC0X00001008.mm.1	7.5	9.65	-4.45	0.1988	0.4761	1700011M02Rik	RIKEN cDNA 1700011M02 gene	Multiple_Complex
TC0X00000863.mm.1	10.58	12.72	-4.42	0.2843	0.5667	Gm14773; RP23-132M12.1	predicted gene 14773 [Source:MGI Symbol;Acc:MGI:3642821]; putative novel transcript	NonCoding
TC0100001119.mm.1	9.42	11.56	-4.42	0.0192	0.1328	Gm23734	predicted gene, 23734 [Source:MGI Symbol;Acc:MGI:5453511]	Small_RNA
TC0X00002261.mm.1	7.28	9.43	-4.41	0.2893	0.5715	Gm773	predicted gene 773	Multiple_Complex
TC1400001062.mm.1	8.66	10.78	-4.37	0.0455	0.2158	Snora31	small nucleolar RNA, H/ACA box 31	Small_RNA
TC0900000812.mm.1	13.57	15.69	-4.36	0.0226	0.1453	Snord16a	small nucleolar RNA, C/D box 16A	Small_RNA
TC0800001976.mm.1	11.64	13.76	-4.36	0.0471	0.2199	Snord13	small nucleolar RNA, C/D box 13	Small_RNA
TC0X00000377.mm.1	9.08	11.2	-4.34	0.3349	0.6132	Gm14567	predicted gene 14567	Multiple_Complex
TC1100001339.mm.1	13.32	15.44	-4.34	0.006	0.0677	Rnu3b1	U3B small nuclear RNA 1 (Rnu3b1), small nuclear RNA.	Multiple_Complex
TC1100001343.mm.1	13.32	15.44	-4.34	0.006	0.0677	Rnu3b2	U3B small nuclear RNA 2 (Rnu3b2), small nuclear RNA.	Multiple_Complex
TC1100001340.mm.1	13.32	15.44	-4.34	0.006	0.0677	Rnu3b3	U3B small nuclear RNA 3 (Rnu3b3), small nuclear RNA.	Multiple_Complex
TC0900000722.mm.1	12.2	14.31	-4.32	0.0806	0.2952	Cyp11a1	cytochrome P450, family 11, subfamily a, polypeptide 1	Coding
TC0X00003409.mm.1	10.16	12.26	-4.29	0.0148	0.1153	Gm15097	predicted gene 15097	Coding
TC0700002991.mm.1	6.82	8.91	-4.26	0.0315	0.1764	Snord35b	small nucleolar RNA, C/D box 35B	Small_RNA
TC0800003201.mm.1	15.5	17.59	-4.26	0.0072	0.0753	Gm26397	predicted gene, 26397 [Source:MGI Symbol;Acc:MGI:5456174]	Small_RNA
TC0600002211.mm.1	10.1	12.18	-4.24	0.0955	0.3241	Rny1	RNA, Y1 small cytoplasmic, Ro-associated	NonCoding
TC1400000568.mm.1	7.1	9.19	-4.24	0.3977	0.6625			NonCoding
TC0700001621.mm.1	8.25	10.33	-4.24	0.0361	0.1898	Gm25636	predicted gene, 25636 [Source:MGI Symbol;Acc:MGI:5455413]	Small_RNA
TSUnmapped00000135.mm.1	13.32	15.4	-4.22	0.0093	0.0867	Rnu3b4	U3B small nuclear RNA 4	Small_RNA
TC0200003567.mm.1	13.76	15.84	-4.22	0.1381	0.3933	Gm13532	predicted gene 13532 [Source:MGI Symbol;Acc:MGI:3651645]	Multiple_Complex
TSUnmapped00000181.mm.1	10.48	12.56	-4.22	0.0923	0.3187	Rny1	RNA, Y1 small cytoplasmic, Ro-associated	Small_RNA
TC1100000804.mm.1	11.33	13.4	-4.2	0.0317	0.1769	Snord49b	small nucleolar RNA, C/D box 49B	Small_RNA
TC0400001136.mm.1	9.8	11.85	-4.16	0.098	0.3286	Magoh	mago homolog, exon junction complex core component; mago-nashi homolog, proliferation-associated (Drosophila) (Magoh), mRNA.; mago-nashi homolog, proliferation-associated (Drosophila)	Multiple_Complex
TC0600001383.mm.1	13.08	15.13	-4.13	0.1414	0.398	Gm8430	predicted pseudogene 8430	Multiple_Complex
TC0400003684.mm.1	6.12	8.17	-4.13	0.0391	0.1977	Gm22767	predicted gene, 22767 [Source:MGI Symbol;Acc:MGI:5452544]	Small_RNA
TC1600001636.mm.1	7.42	9.46	-4.11	0.0463	0.2175	Gm25989	predicted gene, 25989 [Source:MGI Symbol;Acc:MGI:5455766]	Small_RNA
TC0Y00000230.mm.1	12.25	14.28	-4.08	0.0186	0.1311	n-R5s1	nuclear encoded rRNA 5S 1 [Source:MGI Symbol;Acc:MGI:4421733]	Ribosomal
TC0100001948.mm.1	13.87	15.9	-4.07	0.0041	0.0536	Snord87	small nucleolar RNA, C/D box 87	Small_RNA
TC1900000229.mm.1	11.68	13.7	-4.06	0.3055	0.5865	Gm25443	predicted gene, 25443 [Source:MGI Symbol;Acc:MGI:5455220]	Small_RNA
TC0X00001692.mm.1	6.21	8.23	-4.06	0.4044	0.6677	Gm19528	PREDICTED: predicted gene, 19528, transcript variant 1 (Gm19528), miscRNA.	NonCoding
TC0M00000025.mm.1	8.04	10.06	-4.06	0.0331	0.1814	mt-Ts1	mitochondrially encoded tRNA serine 1 [Source:MGI Symbol;Acc:MGI:102475]	tRNA
TC0X00003122.mm.1	8.52	10.54	-4.04	0.1672	0.4354	Gm15067	predicted gene 15067	Pseudogene
TC0900000360.mm.1	11.81	13.82	-4.04	0.1995	0.4768	Gm10177	predicted gene 10177	Multiple_Complex
TC0X00003404.mm.1	9.6	11.61	-4.03	0.0228	0.1462	Gm15085; Gm15080; Ott	predicted gene 15085 (Gm15085), mRNA.; predicted gene 15080; ovary testis transcribed; ovary testis transcribed, mRNA (cDNA clone MGC:129142 IMAGE:40038981), complete cds.; predicted gene 15085	Coding
TC0X00003407.mm.1	9.42	11.42	-4	0.0157	0.1193	Luzp4	leucine zipper protein 4	Coding
TSUnmapped00000183.mm.1	13.47	15.46	-4	0.0082	0.0806	Rnu3b1	U3B small nuclear RNA 1	Small_RNA
TSUnmapped00000179.mm.1	13.47	15.46	-4	0.0082	0.0806	Rnu3b2	U3B small nuclear RNA 2	Small_RNA
TSUnmapped00000182.mm.1	13.47	15.46	-4	0.0082	0.0806	Rnu3b3	U3B small nuclear RNA 3	Small_RNA
TC0500001262.mm.1	14.67	16.66	-3.98	0.0072	0.0753	Gm24265	predicted gene, 24265 [Source:MGI Symbol;Acc:MGI:5454042]	Small_RNA
TC0X00003268.mm.1	9.08	11.07	-3.96	0.0716	0.2769			NonCoding
TC1800001590.mm.1	10.47	12.46	-3.96	0.2673	0.5508	Scarna17	small Cajal body-specific RNA 17	Small_RNA
TC1000001271.mm.1	7.36	9.35	-3.96	0.1213	0.3673	Gm23105	predicted gene, 23105 [Source:MGI Symbol;Acc:MGI:5452882]	Small_RNA
TC0100002740.mm.1	7	8.99	-3.96	0.0065	0.071	Snora75	small nucleolar RNA, H/ACA box 75	Small_RNA
TC1200000143.mm.1	7.14	9.12	-3.95	0.0113	0.0977	Gm22748	predicted gene, 22748 [Source:MGI Symbol;Acc:MGI:5452525]	Small_RNA
TC1200000135.mm.1	8.55	10.53	-3.94	0.024	0.1509	Gm22303	predicted gene, 22303 [Source:MGI Symbol;Acc:MGI:5452080]	Small_RNA
TC0X00003410.mm.1	9.51	11.49	-3.94	0.0231	0.1471	Gm15091	predicted gene 15091	Coding
TC1000001091.mm.1	11.16	13.14	-3.94	0.2185	0.4993	Gm4184	PREDICTED: predicted gene 4184 (Gm4184), mRNA.	Coding
TC0X00003406.mm.1	9.34	11.32	-3.93	0.0157	0.1194	Gm15127	predicted gene 15127	Coding
TC0700001350.mm.1	10.31	12.28	-3.92	0.3976	0.6623	Gm16053	predicted gene 16053 [Source:MGI Symbol;Acc:MGI:3802033]	Pseudogene
TC1200000499.mm.1	10.13	12.1	-3.91	0.0507	0.2292	Gm22973	predicted gene, 22973 [Source:MGI Symbol;Acc:MGI:5452750]	Small_RNA
TC0800002928.mm.1	11.74	13.7	-3.91	0.0027	0.0408	Snord111	small nucleolar RNA, C/D box 111	Small_RNA
TC1200000504.mm.1	6.79	8.75	-3.89	0.0374	0.1929	Gm24233	predicted gene, 24233 [Source:MGI Symbol;Acc:MGI:5454010]	Small_RNA
TC0X00003180.mm.1	10.53	12.48	-3.89	0.2594	0.5428	Gm15148	predicted gene 15148 [Source:MGI Symbol;Acc:MGI:3705350]	Pseudogene
TC1300000573.mm.1	7.74	9.69	-3.88	0.0265	0.1603	Gm25394	predicted gene, 25394 [Source:MGI Symbol;Acc:MGI:5455171]	Small_RNA
TC0X00001487.mm.1	9.39	11.35	-3.87	0.0257	0.1572	Gm10439; Gm15093; Gm15085; Ott	predicted gene 10439; predicted gene 15093 (Gm15093), mRNA.; predicted gene 15085 (Gm15085), mRNA.; ovary testis transcribed (Ott), mRNA.; predicted gene 15085; ovary testis transcribed, mRNA (cDNA clone MGC:129142 IMAGE:40038981), complete cds.; predicted gene 15093	Coding
TC1900001554.mm.1	6.97	8.92	-3.86	0.2964	0.578	Gm24336	predicted gene, 24336 [Source:MGI Symbol;Acc:MGI:5454113]	Small_RNA
TC0100000599.mm.1	14.2	16.14	-3.84	0.0173	0.1257	Gm24497	predicted gene, 24497 [Source:MGI Symbol;Acc:MGI:5454274]	Small_RNA
TC0X00003405.mm.1	9.36	11.29	-3.83	0.0179	0.1278	Gm15107; Gm15114; Gm15093; Gm15085; Ott	predicted gene 15107; predicted gene 15114; predicted gene 15093; predicted gene 15085; predicted gene 15085 (Gm15085), mRNA.; ovary testis transcribed (Ott), mRNA.; ovary testis transcribed, mRNA (cDNA clone MGC:129142 IMAGE:40038981), complete cds.	Multiple_Complex
TC0700002510.mm.1	7.47	9.41	-3.82	0.0141	0.1121	n-R5s152	nuclear encoded rRNA 5S 152 [Source:MGI Symbol;Acc:MGI:4422015]	Ribosomal
TC1100001245.mm.1	14.32	16.26	-3.82	0.0162	0.1207	Gm23444	predicted gene, 23444 [Source:MGI Symbol;Acc:MGI:5453221]	Small_RNA
TC0100000598.mm.1	14.32	16.26	-3.82	0.0162	0.1207	Gm23472	predicted gene, 23472 [Source:MGI Symbol;Acc:MGI:5453249]	Small_RNA
TC0700000229.mm.1	13.76	15.69	-3.81	0.0141	0.112	n-R5s151	nuclear encoded rRNA 5S 151 [Source:MGI Symbol;Acc:MGI:4422013]	Ribosomal
TC1100000805.mm.1	9.18	11.1	-3.8	0.2468	0.5301	Snord49a	small nucleolar RNA, C/D box 49A	Small_RNA
TC1100001662.mm.1	12.87	14.8	-3.8	0.0247	0.1534	Gm26316	predicted gene, 26316 [Source:MGI Symbol;Acc:MGI:5456093]	Small_RNA
TC0600002961.mm.1	7.06	8.98	-3.8	0.1041	0.3396	Snora7a	small nucleolar RNA, H/ACA box 7A	Small_RNA
TC1300001668.mm.1	8.98	10.9	-3.79	0.0177	0.1271	Gm22358	predicted gene, 22358 [Source:MGI Symbol;Acc:MGI:5452135]	Small_RNA
TC0X00002051.mm.1	8.07	9.99	-3.79	0.1977	0.4747	Gm14541	predicted gene 14541 [Source:MGI Symbol;Acc:MGI:3709642]	Pseudogene
TC1000002930.mm.1	5.77	7.69	-3.78	0.0149	0.1157	Lyz1	lysozyme 1	Coding
TC1100003289.mm.1	12.22	14.14	-3.78	0.0056	0.0644	Snord42a	small nucleolar RNA, C/D box 42A	Small_RNA
TC1100003657.mm.1	11.57	13.49	-3.77	0.0143	0.1131	Snora21	small nucleolar RNA, H/ACA box 21	Small_RNA
TC1100001659.mm.1	12.05	13.97	-3.77	0.0262	0.1588	Gm11625	predicted gene 11625 [Source:MGI Symbol;Acc:MGI:3650862]	Multiple_Complex
TC1000001189.mm.1	9.33	11.25	-3.77	3.02e-07	0.0001	Dcn	decorin	Multiple_Complex
TC0X00000872.mm.1	7.4	9.32	-3.76	0.4852	0.7261	Gm8954	PREDICTED: predicted gene 8954 (Gm8954), miscRNA.	NonCoding
TC0M00000026.mm.1	10.59	12.49	-3.75	0.0924	0.3188			NonCoding
TC0300002745.mm.1	10.57	12.48	-3.74	0.1328	0.3854	Scarna2	small Cajal body-specific RNA 2	Small_RNA
TC1300001066.mm.1	12.28	14.18	-3.74	0.2688	0.5521	Tbca	tubulin cofactor A	Coding
TC1100002205.mm.1	7.94	9.84	-3.72	0.0711	0.2761	Gm19752	PREDICTED: predicted gene, 19752 (Gm19752), miscRNA.	NonCoding
TC0X00001282.mm.1	7.59	9.48	-3.72	0.1765	0.4477	Rpl36a	ribosomal protein L36A	Multiple_Complex
TC0X00003408.mm.1	9.53	11.42	-3.71	0.023	0.1469	Gm15093; Gm15085; Ott	predicted gene 15093 (Gm15093), mRNA.; predicted gene 15085 (Gm15085), mRNA.; ovary testis transcribed (Ott), mRNA.; ovary testis transcribed; predicted gene 15093; ovary testis transcribed, mRNA (cDNA clone MGC:129142 IMAGE:40038981), complete cds.; predicted gene 15085	Coding
TC1800000292.mm.1	10.59	12.48	-3.7	0.0186	0.1308	n-R5s25	nuclear encoded rRNA 5S 25 [Source:MGI Symbol;Acc:MGI:4421760]	Ribosomal
TC1100001665.mm.1	14.37	16.25	-3.67	0.0156	0.1185	Gm23849	predicted gene, 23849 [Source:MGI Symbol;Acc:MGI:5453626]	Small_RNA
TC1100003811.mm.1	14.37	16.25	-3.67	0.0156	0.1185	Gm23971	predicted gene, 23971 [Source:MGI Symbol;Acc:MGI:5453748]	Small_RNA
TC0100000460.mm.1	8.53	10.4	-3.67	0.0404	0.2015	Snord11	small nucleolar RNA, C/D box 11	Small_RNA
TC0X00001160.mm.1	5.98	7.86	-3.66	0.0173	0.1257	Gm24438	predicted gene, 24438 [Source:MGI Symbol;Acc:MGI:5454215]	Small_RNA
TC0100001865.mm.1	9.74	11.61	-3.65	0.0057	0.0654	Gm22265	predicted gene, 22265 [Source:MGI Symbol;Acc:MGI:5452042]	Small_RNA
TC1200001832.mm.1	9.06	10.92	-3.65	0.1259	0.3747	Fkbp3	FK506 binding protein 3	Coding
TC1500000262.mm.1	8.32	10.19	-3.64	0.3005	0.5813	Polr2k	polymerase (RNA) II (DNA directed) polypeptide K	Coding
TC1100000097.mm.1	8.47	10.33	-3.63	0.213	0.493	Gm11970	predicted gene 11970 [Source:MGI Symbol;Acc:MGI:3650056]	Multiple_Complex
TC0200004924.mm.1	10.72	12.58	-3.63	0.231	0.5131	Gm20094	PREDICTED: predicted gene, 20094 (Gm20094), mRNA.	Coding
TC0900001095.mm.1	13.28	15.13	-3.62	0.1665	0.4345	Rps27a-ps2	ribosomal protein S27A, pseudogene 2 [Source:MGI Symbol;Acc:MGI:3643614]	Multiple_Complex
TC1700000282.mm.1	12.37	14.22	-3.61	0.0742	0.2824			NonCoding
TC1900000398.mm.1	11.25	13.1	-3.6	0.0095	0.0876	Gm10053	predicted gene 10053 [Source:MGI Symbol;Acc:MGI:3704493]	Coding
TC1000001299.mm.1	13.61	15.45	-3.58	0.0126	0.1044	Gm25117	predicted gene, 25117 [Source:MGI Symbol;Acc:MGI:5454894]	Small_RNA
TC1100000648.mm.1	7.28	9.12	-3.58	0.0032	0.0461	Gm12238	predicted gene 12238	Multiple_Complex
TC0900000820.mm.1	5.4	7.24	-3.57	0.0299	0.1711	Gm24289	predicted gene, 24289 [Source:MGI Symbol;Acc:MGI:5454066]	Small_RNA
TC1800001376.mm.1	8.82	10.66	-3.57	0.2919	0.5739	Gm19486	PREDICTED: predicted gene, 19486 (Gm19486), mRNA.	Coding
TC0M00000018.mm.1	13.13	14.97	-3.56	0.0265	0.1603			NonCoding
TC1700000925.mm.1	9.29	11.12	-3.56	0.0173	0.1257	n-R5s28	nuclear encoded rRNA 5S 28 [Source:MGI Symbol;Acc:MGI:4421873]	Ribosomal
TC0M00000028.mm.1	13.9	15.73	-3.56	0.0063	0.0693	mt-Te	mitochondrially encoded tRNA glutamic acid [Source:MGI Symbol;Acc:MGI:102488]	tRNA
TC0300002619.mm.1	14.42	16.23	-3.52	0.0248	0.1537	Sycp1	synaptonemal complex protein 1	Coding
TC0100003237.mm.1	10.39	12.19	-3.49	0.0039	0.0522	Gm15453	predicted gene 15453	Multiple_Complex
TSUnmapped00000184.mm.1	14.57	16.37	-3.49	0.0142	0.1124	Rnu2-10	U2 small nuclear RNA 10	Small_RNA
TC0900001281.mm.1	11.3	13.11	-3.49	0.0077	0.0782	n-R5s88	nuclear encoded rRNA 5S 88 [Source:MGI Symbol;Acc:MGI:4421936]	Ribosomal
TC0500001088.mm.1	7.04	8.85	-3.49	0.0942	0.3219	Gm22270	predicted gene, 22270 [Source:MGI Symbol;Acc:MGI:5452047]	Small_RNA
TC0800003119.mm.1	15.27	17.07	-3.48	0.0083	0.0811	n-R5s115	nuclear encoded rRNA 5S 115 [Source:MGI Symbol;Acc:MGI:4421965]	Ribosomal
TC1100001667.mm.1	14.48	16.28	-3.48	0.0154	0.1178	Rnu2-10	U2 small nuclear RNA 10	Small_RNA
TC0200000935.mm.1	11.96	13.75	-3.47	0.4218	0.681			NonCoding
TSUnmapped00000175.mm.1	11.87	13.66	-3.46	0.0418	0.2059	Snord13	small nucleolar RNA, C/D box 13	Small_RNA
TC0700001584.mm.1	12.08	13.86	-3.45	0.0033	0.0467	Gm10156	predicted gene 10156 [Source:MGI Symbol;Acc:MGI:3642344]	Pseudogene
TC0100002417.mm.1	9.8	11.59	-3.45	0.2663	0.55	Gm11575	predicted gene 11575	Multiple_Complex
TC0X00000512.mm.1	8.35	10.13	-3.45	0.4181	0.6787	3830403N18Rik	RIKEN cDNA 3830403N18 gene	Coding
TC0800000395.mm.1	14.35	16.13	-3.45	0.0044	0.0564	Gm24727	predicted gene, 24727 [Source:MGI Symbol;Acc:MGI:5454504]	Small_RNA
TC0800003116.mm.1	13.82	15.6	-3.44	0.0328	0.1805	n-R5s112	nuclear encoded rRNA 5S 112 [Source:MGI Symbol;Acc:MGI:4421960]	Ribosomal
TC0800003124.mm.1	13.82	15.6	-3.44	0.0328	0.1805	n-R5s120	nuclear encoded rRNA 5S 120 [Source:MGI Symbol;Acc:MGI:4421972]	Ribosomal
TC0800003129.mm.1	13.82	15.6	-3.44	0.0328	0.1805	n-R5s125	nuclear encoded rRNA 5S 125 [Source:MGI Symbol;Acc:MGI:4421979]	Ribosomal
TC0X00001118.mm.1	8.07	9.85	-3.44	0.0068	0.0728	Tex16; L1Md-Gf21	testis expressed gene 16; PREDICTED: L1 repeat, Gf subfamily, member 21 (L1Md-Gf21), miscRNA.	Multiple_Complex
TC0X00003182.mm.1	11.79	13.57	-3.44	0.3273	0.6064	Gm15151	predicted gene 15151 [Source:MGI Symbol;Acc:MGI:3705644]	Pseudogene
TC0X00003416.mm.1	7.75	9.53	-3.43	0.1295	0.3803	Ssxb8	synovial sarcoma, X member B, breakpoint 8	Coding
TC0700001853.mm.1	7.39	9.17	-3.42	0.0527	0.2343	Snora30	small nucleolar RNA, H/ACA box 30	Small_RNA
TC0100000256.mm.1	10.13	11.91	-3.42	0.019	0.1322	n-R5s210	nuclear encoded rRNA 5S 210 [Source:MGI Symbol;Acc:MGI:4422075]	Ribosomal
TC0200000038.mm.1	7.08	8.85	-3.42	0.2111	0.4904	Gm13194	predicted gene 13194	Multiple_Complex
TC1000000346.mm.1	11.95	13.72	-3.42	0.0255	0.1563	Rnu3a	U3A small nuclear RNA	Multiple_Complex
TC0X00003042.mm.1	8.45	10.23	-3.41	0.5091	0.7432	Tmsb15b2; Tmsb15b1; Tmsb15l	thymosin beta 15b2; thymosin beta 15b1; thymosin beta 15b like	Coding
TC0500003655.mm.1	5.91	7.68	-3.41	0.0252	0.1552	n-R5s180	nuclear encoded rRNA 5S 180 [Source:MGI Symbol;Acc:MGI:4422045]	Ribosomal
TC0300000905.mm.1	12.63	14.39	-3.4	0.0333	0.182	Hormad1	HORMA domain containing 1	Multiple_Complex
TC1200002303.mm.1	6.48	8.24	-3.4	0.2099	0.4891	Scarna13; Mir3069	small Cajal body-specific RNA 1; microRNA 3069; microRNA 3069 (Mir3069), microRNA.	Multiple_Complex
TC0X00001925.mm.1	13.49	15.24	-3.37	0.3217	0.6015	Gm14539	predicted gene 14539	Pseudogene
TC0300000734.mm.1	6.4	8.15	-3.37	0.1167	0.3599	Gm25820	predicted gene, 25820	Small_RNA
TC0200004769.mm.1	8.87	10.62	-3.36	0.1623	0.4285	Gm11759	predicted gene 11759 [Source:MGI Symbol;Acc:MGI:3651480]	Pseudogene
TC0X00003403.mm.1	9.89	11.64	-3.36	0.0422	0.2065	Gm15128; Gm15107	predicted gene 15128; predicted gene 15107	Coding
TC1200001786.mm.1	13.47	15.22	-3.36	0.1628	0.4294	Gm6265	predicted pseudogene 6265	Multiple_Complex
TC0X00002057.mm.1	7.36	9.1	-3.35	0.1203	0.3657	Rpl39	ribosomal protein L39	Multiple_Complex
TC0500001354.mm.1	9.1	10.84	-3.34	0.0797	0.2936	Gm26205	predicted gene, 26205 [Source:MGI Symbol;Acc:MGI:5455982]	Small_RNA
TC1100003150.mm.1	6.2	7.94	-3.34	0.0956	0.3242	Gm24143	predicted gene, 24143 [Source:MGI Symbol;Acc:MGI:5453920]	Small_RNA
TC0400003663.mm.1	11.6	13.34	-3.34	0.0195	0.1343	Gm13252	predicted gene 13252 [Source:MGI Symbol;Acc:MGI:3651953]	Multiple_Complex
TC1100002700.mm.1	15.94	17.68	-3.33	0.0045	0.0569	Gm25291	predicted gene, 25291 [Source:MGI Symbol;Acc:MGI:5455068]	Small_RNA
TC0600002515.mm.1	10.81	12.55	-3.33	0.2088	0.4879	Gm9001	predicted gene 9001 [Source:MGI Symbol;Acc:MGI:3647168]	Multiple_Complex
TC0400003664.mm.1	12.62	14.36	-3.33	0.037	0.1919	Rnu11	U11 small nuclear RNA	Small_RNA
TC0600002253.mm.1	8.63	10.36	-3.32	0.0149	0.1157	Cycs	cytochrome c, somatic	Multiple_Complex
TC0500002086.mm.1	11.94	13.67	-3.32	0.1916	0.4665	Gm10221	predicted gene 10221 [Source:MGI Symbol;Acc:MGI:3708709]	Coding
TC1700000408.mm.1	14.43	16.16	-3.32	0.0049	0.06	Gm23123	predicted gene, 23123 [Source:MGI Symbol;Acc:MGI:5452900]	Small_RNA
TC0900000814.mm.1	9.24	10.97	-3.32	0.0313	0.1757	Gm23136	predicted gene, 23136 [Source:MGI Symbol;Acc:MGI:5452913]	Small_RNA
TC0500001096.mm.1	8.93	10.66	-3.32	0.0126	0.1045	Ccdc18	coiled-coil domain containing 18	Multiple_Complex
TC0X00000857.mm.1	8.31	10.04	-3.31	0.2727	0.5553	Gm16412	predicted pseudogene 16412 [Source:MGI Symbol;Acc:MGI:3645317]	Multiple_Complex
TC0700001349.mm.1	9.41	11.14	-3.31	0.1124	0.3529	Ndufc2	NADH dehydrogenase (ubiquinone) 1, subcomplex unknown, 2	Multiple_Complex
TC1200000878.mm.1	11.4	13.12	-3.31	0.2958	0.5774	Slirp	SRA stem-loop interacting RNA binding protein	Coding
TC0500002562.mm.1	14.35	16.07	-3.3	0.1799	0.4519	Cox7b2	cytochrome c oxidase subunit VIIb2	Coding
TC0200002200.mm.1	11.55	13.27	-3.3	0.1721	0.442	Cst12	cystatin 12	Coding
TC0200001013.mm.1	11.09	12.81	-3.3	0.0167	0.1231	Ssb	Sjogren syndrome antigen B	Multiple_Complex
TC0600001734.mm.1	9.42	11.14	-3.28	0.1622	0.4284	Med21	mediator complex subunit 21	Multiple_Complex
TC0700000963.mm.1	10.38	12.09	-3.28	0.2589	0.5423	Atp5l-ps1	ATP synthase, H+ transporting, mitochondrial F0 complex, subunit G, pseudogene 1 [Source:MGI Symbol;Acc:MGI:2153586]	Pseudogene
TC0400002874.mm.1	9.91	11.62	-3.28	0.0136	0.1097	Gm22864	predicted gene, 22864 [Source:MGI Symbol;Acc:MGI:5452641]	Small_RNA
TC1500000767.mm.1	8.07	9.77	-3.27	0.0526	0.234	Rnu12	RNA U12, small nuclear	Small_RNA
TC1500000509.mm.1	9.07	10.78	-3.27	0.0077	0.0785	Gm22519	predicted gene, 22519 [Source:MGI Symbol;Acc:MGI:5452296]	Small_RNA
TC1000000578.mm.1	8.84	10.55	-3.27	0.0047	0.0586	Gm5424	predicted gene 5424 [Source:MGI Symbol;Acc:MGI:3643173]	Coding
TC1400001911.mm.1	10.32	12.03	-3.27	0.1516	0.4137	Gm8317	predicted gene 8317 [Source:MGI Symbol;Acc:MGI:3646695]	Multiple_Complex
TC0200003704.mm.1	9.86	11.57	-3.26	0.0026	0.0398	Gm13624	predicted gene 13624 [Source:MGI Symbol;Acc:MGI:3649579]	Multiple_Complex
TC0X00000504.mm.1	13.98	15.69	-3.26	0.3445	0.6211	Gm14625	predicted gene 14625	Multiple_Complex
TC0100000730.mm.1	4.49	6.2	-3.26	0.2474	0.5304			NonCoding
TC0100000739.mm.1	4.49	6.2	-3.26	0.2474	0.5304			NonCoding
TC0100000748.mm.1	4.49	6.2	-3.26	0.2474	0.5304			NonCoding
TC0100000753.mm.1	4.49	6.2	-3.26	0.2474	0.5304			NonCoding
TC0100002706.mm.1	4.49	6.2	-3.26	0.2474	0.5304			NonCoding
TC0500003459.mm.1	4.49	6.2	-3.26	0.2474	0.5304			NonCoding
TC1_GL456211_random00000012.mm.1	4.49	6.2	-3.26	0.2474	0.5304			NonCoding
TC1_GL456211_random00000017.mm.1	4.49	6.2	-3.26	0.2474	0.5304			NonCoding
TC1_GL456212_random00000002.mm.1	4.49	6.2	-3.26	0.2474	0.5304			NonCoding
TC1_GL456212_random00000012.mm.1	4.49	6.2	-3.26	0.2474	0.5304			NonCoding
TC1_GL456221_random00000006.mm.1	4.49	6.2	-3.26	0.2474	0.5304			NonCoding
TC1_GL456221_random00000023.mm.1	4.49	6.2	-3.26	0.2474	0.5304			NonCoding
TC0100000354.mm.1	10.82	12.52	-3.26	0.0287	0.1675	n-R5s211	nuclear encoded rRNA 5S 211 [Source:MGI Symbol;Acc:MGI:4422076]	Ribosomal
TC1900001621.mm.1	12.75	14.45	-3.25	0.2742	0.557	Usmg5	upregulated during skeletal muscle growth 5	Multiple_Complex
TC0X00000500.mm.1	14.1	15.8	-3.25	0.3417	0.6192	Gm7958; Gm16405	predicted gene 7958; predicted gene 16405	Pseudogene
TC0X00001322.mm.1	8.82	10.52	-3.24	0.0748	0.2837	Wbp5	WW domain binding protein 5	Coding
TC0X00000491.mm.1	14.05	15.75	-3.24	0.3413	0.6187	Gm14598	predicted gene 14598	Pseudogene
TC0300001668.mm.1	8.57	10.27	-3.24	0.2884	0.5707	Gm16399	predicted pseudogene 16399 [Source:MGI Symbol;Acc:MGI:3645963]	Multiple_Complex
TC0700003094.mm.1	8.97	10.66	-3.24	0.2148	0.4947	Gm5776	predicted gene 5776	Multiple_Complex
TC0100000103.mm.1	6.34	8.04	-3.23	0.2264	0.5081	Ly96	lymphocyte antigen 96	Coding
TC0100000600.mm.1	12.47	14.16	-3.23	0.0163	0.1213	Gm25939	predicted gene, 25939 [Source:MGI Symbol;Acc:MGI:5455716]	Small_RNA
TC0X00002245.mm.1	10.63	12.33	-3.23	0.1939	0.4698	1700013H16Rik	RIKEN cDNA 1700013H16 gene	Coding
TC1900000716.mm.1	13.42	15.11	-3.23	0.0352	0.1873	Gm23140	predicted gene, 23140 [Source:MGI Symbol;Acc:MGI:5452917]	Small_RNA
TC1100001549.mm.1	10.79	12.48	-3.22	0.2282	0.5101	Atp5l2-ps	ATP synthase, H+ transporting, mitochondrial FO complex, subunit G2, pseudogene	Pseudogene
TC0700003466.mm.1	6.42	8.11	-3.22	0.0223	0.1441	Gm23795	predicted gene, 23795 [Source:MGI Symbol;Acc:MGI:5453572]	Small_RNA
TC0200003219.mm.1	5.54	7.22	-3.22	0.1849	0.4583	Gm25541	predicted gene, 25541 [Source:MGI Symbol;Acc:MGI:5455318]	Small_RNA
TC1400001179.mm.1	9.87	11.55	-3.21	0.0346	0.1857	Gm23764	predicted gene, 23764 [Source:MGI Symbol;Acc:MGI:5453541]	Ribosomal
TCX_GL456233_random00000005.mm.1	6.8	8.48	-3.2	0.0813	0.2967	Vamp7	vesicle-associated membrane protein 7	Coding
TC1100000143.mm.1	8.85	10.53	-3.2	0.1546	0.4181	Gm12005	predicted gene 12005 [Source:MGI Symbol;Acc:MGI:3651316]	Pseudogene
TC0X00000494.mm.1	14.08	15.76	-3.2	0.357	0.6298	Gm16430; Gm16405	predicted gene 16430; predicted gene 16405 (Gm16405), mRNA.; predicted gene 16405	Coding
TC0X00000505.mm.1	13.74	15.42	-3.2	0.3386	0.6164	Gm16404	predicted gene 16404	Multiple_Complex
TC1300000788.mm.1	15.67	17.34	-3.19	0.0049	0.0601	Gm24130	predicted gene, 24130 [Source:MGI Symbol;Acc:MGI:5453907]	Small_RNA
TC0X00003393.mm.1	13.83	15.5	-3.19	0.4296	0.687	Gm14596	predicted gene 14596	Pseudogene
TC0X00002709.mm.1	8.21	9.89	-3.18	0.0051	0.0616	Tex11	testis expressed gene 11	Coding
TC1400000173.mm.1	7.23	8.9	-3.18	0.3121	0.593	Chchd1	coiled-coil-helix-coiled-coil-helix domain containing 1	Multiple_Complex
TC0X00002248.mm.1	8.38	10.05	-3.18	0.3982	0.6629	Gm14599	predicted gene 14599 [Source:MGI Symbol;Acc:MGI:3705841]	Pseudogene
TC0X00002247.mm.1	7.94	9.61	-3.18	0.3716	0.6422	Xlr	X-linked lymphocyte-regulated; X-linked lymphocyte-regulated complex	Coding
TC0X00003394.mm.1	14.01	15.67	-3.18	0.4016	0.6657	Gm14594; Gm16405	predicted gene 14594; predicted gene 16405	Pseudogene
TC0200004466.mm.1	7.08	8.75	-3.18	0.0179	0.1281	n-R5s205	nuclear encoded rRNA 5S 205 [Source:MGI Symbol;Acc:MGI:4422070]	Ribosomal
TC1700000679.mm.1	8	9.67	-3.18	0.0696	0.2729	Gm25128	predicted gene, 25128 [Source:MGI Symbol;Acc:MGI:5454905]	Small_RNA
TC0800003131.mm.1	8.79	10.46	-3.18	0.036	0.1898	n-R5s127	nuclear encoded rRNA 5S 127 [Source:MGI Symbol;Acc:MGI:4421983]	Ribosomal
TC0300001815.mm.1	8.74	10.41	-3.17	0.4846	0.7257			NonCoding
TC1200002516.mm.1	9.45	11.11	-3.17	0.055	0.2401	Gm25675	predicted gene, 25675 [Source:MGI Symbol;Acc:MGI:5455452]	Ribosomal
TC1200001747.mm.1	9.08	10.74	-3.16	0.0751	0.2844	Sptssa; Mir1892	serine palmitoyltransferase, small subunit A; microRNA 1892; microRNA 1892 (Mir1892), microRNA.	Multiple_Complex
TC0100000780.mm.1	6.4	8.07	-3.16	0.0508	0.2295	Gm22786	predicted gene, 22786 [Source:MGI Symbol;Acc:MGI:5452563]	Small_RNA
TC0100003367.mm.1	6.12	7.78	-3.16	0.0182	0.1291	Gm24988	predicted gene, 24988 [Source:MGI Symbol;Acc:MGI:5454765]	Small_RNA
TC1600000603.mm.1	13.77	15.42	-3.15	0.0425	0.2077	Gm26381	predicted gene, 26381 [Source:MGI Symbol;Acc:MGI:5456158]	Ribosomal
TC1600000691.mm.1	8.55	10.2	-3.15	0.0115	0.0989	Gm7204	predicted pseudogene 7204 [Source:MGI Symbol;Acc:MGI:3645884]	Pseudogene
TC0300003191.mm.1	9.91	11.56	-3.14	0.0629	0.2585	Gm23379	predicted gene, 23379 [Source:MGI Symbol;Acc:MGI:5453156]	Small_RNA
TC0X00002061.mm.1	8.32	9.97	-3.14	0.2711	0.554	Ndufa1	NADH dehydrogenase (ubiquinone) 1 alpha subcomplex, 1	Coding
TC1800000840.mm.1	11.17	12.82	-3.14	0.03	0.1717	Gm26430	predicted gene, 26430 [Source:MGI Symbol;Acc:MGI:5456207]	Small_RNA
TC0100000169.mm.1	12.94	14.59	-3.14	0.1136	0.3547			NonCoding
TC0X00000380.mm.1	9.11	10.76	-3.13	0.5287	0.7571	Cypt15	cysteine-rich perinuclear theca 15	Coding
TC0800003105.mm.1	13.62	15.27	-3.13	0.0194	0.1336	n-R5s101	nuclear encoded rRNA 5S 101 [Source:MGI Symbol;Acc:MGI:4421949]	Ribosomal
TC0800003118.mm.1	13.62	15.27	-3.13	0.0194	0.1336	n-R5s114	nuclear encoded rRNA 5S 114 [Source:MGI Symbol;Acc:MGI:4421962]	Ribosomal
TC0800003123.mm.1	13.62	15.27	-3.13	0.0194	0.1336	n-R5s119	nuclear encoded rRNA 5S 119 [Source:MGI Symbol;Acc:MGI:4421971]	Ribosomal
TC0800003133.mm.1	13.62	15.27	-3.13	0.0194	0.1336	n-R5s129	nuclear encoded rRNA 5S 129 [Source:MGI Symbol;Acc:MGI:4421985]	Ribosomal
TC0800003135.mm.1	13.62	15.27	-3.13	0.0194	0.1336	n-R5s131	nuclear encoded rRNA 5S 131 [Source:MGI Symbol;Acc:MGI:4421987]	Ribosomal
TC0800003154.mm.1	15.03	16.67	-3.12	0.0401	0.2008	Gm23647	predicted gene, 23647 [Source:MGI Symbol;Acc:MGI:5453424]	Ribosomal
TC0800003141.mm.1	15.03	16.67	-3.12	0.0401	0.2008	Gm24089	predicted gene, 24089 [Source:MGI Symbol;Acc:MGI:5453866]	Ribosomal
TC0X00000495.mm.1	14.09	15.73	-3.12	0.3775	0.6462	Gm16430; Gm16405	predicted gene 16430 (Gm16430), mRNA.; predicted gene 16405; predicted gene 16430	Coding
TC1500002299.mm.1	11.56	13.2	-3.12	0.1364	0.3907	Atp5g2	ATP synthase, H+ transporting, mitochondrial F0 complex, subunit C2 (subunit 9)	Coding
TC0400002192.mm.1	6.28	7.92	-3.12	0.2459	0.5292			NonCoding
TC0200004124.mm.1	6.2	7.84	-3.12	0.1625	0.4288	Gm13771	predicted gene 13771 [Source:MGI Symbol;Acc:MGI:3650181]	Multiple_Complex
TC0X00001802.mm.1	7.02	8.66	-3.11	0.1243	0.3721	Ssxb2	synovial sarcoma, X member B, breakpoint 2	Coding
TC0500001407.mm.1	5.27	6.9	-3.11	0.0981	0.3286	Gm6444	predicted gene 6444 [Source:MGI Symbol;Acc:MGI:3648226]	Pseudogene
TC0X00001365.mm.1	7.63	9.26	-3.11	0.4858	0.7265	4930513O06Rik	RIKEN cDNA 4930513O06 gene	Coding
TC0400001283.mm.1	8.76	10.39	-3.11	0.0156	0.1186	Gm23143	predicted gene, 23143 [Source:MGI Symbol;Acc:MGI:5452920]	Small_RNA
TC0X00000496.mm.1	14.08	15.71	-3.1	0.4131	0.6749	Gm14595; Gm16405	predicted gene 14595; predicted gene 16405	Pseudogene
TC0100001307.mm.1	6.69	8.32	-3.1	0.0363	0.1898	Gm26048	predicted gene, 26048 [Source:MGI Symbol;Acc:MGI:5455825]	Small_RNA
TC0200005490.mm.1	11.46	13.09	-3.09	0.2353	0.5176	Gm14305	predicted gene 14305	Coding
TC0600000090.mm.1	11.97	13.59	-3.09	0.0706	0.275	Gm15529	predicted gene 15529 [Source:MGI Symbol;Acc:MGI:3782977]	Pseudogene
TC0900001144.mm.1	12.15	13.78	-3.09	0.0195	0.1342	Gm24463	predicted gene, 24463 [Source:MGI Symbol;Acc:MGI:5454240]	Small_RNA
TC0X00000499.mm.1	14.58	16.21	-3.09	0.3454	0.6219	Gm7950; Gm16405	predicted pseudogene 7950; predicted gene 16405	Pseudogene
TC0X00001927.mm.1	6.13	7.75	-3.09	0.1666	0.4346	Ndufb11	NADH dehydrogenase (ubiquinone) 1 beta subcomplex, 11	Coding
TC0X00000503.mm.1	15	16.62	-3.08	0.2771	0.5602	Gm6660	predicted gene 6660 [Source:MGI Symbol;Acc:MGI:3645872]	Pseudogene
TC1000002703.mm.1	10.73	12.36	-3.08	0.0464	0.218	Gm26122	predicted gene, 26122 [Source:MGI Symbol;Acc:MGI:5455899]	Small_RNA
TC1600001748.mm.1	6.39	8.01	-3.08	0.0627	0.258	Gm22422	predicted gene, 22422 [Source:MGI Symbol;Acc:MGI:5452199]	Small_RNA
TC0600001818.mm.1	9.82	11.44	-3.08	0.2482	0.5312	Gm27018	predicted gene, 27018 [Source:MGI Symbol;Acc:MGI:5504133]	Multiple_Complex
TC0X00003385.mm.1	7.6	9.22	-3.08	0.1725	0.4425	Ssxb1	synovial sarcoma, X member B, breakpoint 1	Coding
TC0600000722.mm.1	8.66	10.28	-3.07	0.0873	0.3089	n-R5s162	nuclear encoded rRNA 5S 162 [Source:MGI Symbol;Acc:MGI:4422026]	Ribosomal
TC0200005300.mm.1	9.08	10.69	-3.06	0.1569	0.421	Atp5k-ps2	ATP synthase, H+ transporting, mitochondrial F1F0 complex, subunit E, pseudogene 2 [Source:MGI Symbol;Acc:MGI:107356]	Multiple_Complex
TC1300001837.mm.1	10.35	11.96	-3.05	0.0242	0.1518	Eef1e1	eukaryotic translation elongation factor 1 epsilon 1	Coding
TC0400002526.mm.1	16.05	17.66	-3.05	0.0434	0.2101	Rmrp	RNA component of mitochondrial RNAase P	NonCoding
TC1000001081.mm.1	14.5	16.11	-3.05	0.0397	0.1996	Sycp3	synaptonemal complex protein 3	Coding
TC0100000596.mm.1	11.88	13.49	-3.05	0.0352	0.1874	Gm25360	predicted gene, 25360 [Source:MGI Symbol;Acc:MGI:5455137]	Small_RNA
TC0M00000005.mm.1	12.47	14.08	-3.05	0.0012	0.0249	ND2	NADH dehydrogenase subunit 2	Multiple_Complex
TC1600000624.mm.1	7.21	8.81	-3.04	0.0388	0.197	Gm25873	predicted gene, 25873 [Source:MGI Symbol;Acc:MGI:5455650]	Small_RNA
TC0X00000497.mm.1	14.22	15.82	-3.03	0.4016	0.6657	Gm14590; Gm16405	predicted gene 14590; predicted gene 16405	Pseudogene
TC0800002233.mm.1	13	14.6	-3.03	0.0204	0.1375	Gm25813	predicted gene, 25813 [Source:MGI Symbol;Acc:MGI:5455590]	Small_RNA
TC0400000085.mm.1	9.03	10.63	-3.02	0.009	0.0856	Ccne2	cyclin E2	Multiple_Complex
TC0500001263.mm.1	14.78	16.38	-3.02	0.0078	0.0788	Gm24407	predicted gene, 24407 [Source:MGI Symbol;Acc:MGI:5454184]	Small_RNA
TC0M00000001.mm.1	8.47	10.06	-3.02	0.1036	0.3388	mt-Tf	mitochondrially encoded tRNA phenylalanine [Source:MGI Symbol;Acc:MGI:102487]	tRNA
TC1300000268.mm.1	17.25	18.84	-3.02	0.0625	0.2577	Hist1h2aa	histone cluster 1, H2aa	Coding
TC1400000485.mm.1	11.36	12.95	-3.02	0.0845	0.3036	Psmc6	proteasome (prosome, macropain) 26S subunit, ATPase, 6	Coding
TC0200004892.mm.1	13.01	14.6	-3.01	0.2846	0.567	Rps15a-ps7	ribosomal protein S15A, pseudogene 7	Multiple_Complex
TC0400001259.mm.1	7.44	9.03	-3.01	0.011	0.0963	Prdx1	peroxiredoxin 1	Multiple_Complex
TC0X00002858.mm.1	7.12	8.71	-3.01	0.7215	0.8737			NonCoding
TC0200000032.mm.1	9.99	11.58	-3	0.1718	0.4417	Gm13196	predicted gene 13196	Pseudogene
TC0X00003413.mm.1	6.87	8.45	-3	0.1319	0.3841	Gm14459	predicted gene 14459	Coding
TC0500000210.mm.1	11.41	12.99	-3	0.1896	0.4642	Mir684-1	microRNA 684-1 (Mir684-1), microRNA.; microRNA 684-1	Multiple_Complex
TC0700001845.mm.1	11.41	12.99	-3	0.1896	0.4642	Mir684-1	microRNA 684-1 (Mir684-1), microRNA.; microRNA 684-1	Multiple_Complex
TC0X00000067.mm.1	11.41	12.99	-3	0.1896	0.4642	Mir684-1	microRNA 684-1 (Mir684-1), microRNA.; microRNA 684-1	Multiple_Complex
TC1000001650.mm.1	11.41	12.99	-3	0.1896	0.4642	Mir684-1	microRNA 684-1 (Mir684-1), microRNA.; microRNA 684-1	Multiple_Complex
TC1100003211.mm.1	11.41	12.99	-3	0.1896	0.4642	Mir684-1	microRNA 684-1 (Mir684-1), microRNA.; microRNA 684-1	Multiple_Complex
TC1200000034.mm.1	6.23	7.81	-2.99	0.0794	0.2928	Sf3b6	splicing factor 3B, subunit 6	Multiple_Complex
TC0600001817.mm.1	11.56	13.14	-2.99	0.2225	0.5041	Gm8649	predicted gene 8649 [Source:MGI Symbol;Acc:MGI:3644257]	Multiple_Complex
TC0X00000502.mm.1	14.19	15.77	-2.99	0.3964	0.6615	Slxl1	Slx-like 1	Coding
TC0700000784.mm.1	7.91	9.49	-2.99	0.0035	0.0483	Klk1b1	kallikrein 1-related peptidase b1	Coding
TC1500001897.mm.1	6.64	8.22	-2.98	0.1597	0.4249	Snord83b	small nucleolar RNA, C/D box 83B	Small_RNA
TC1600000002.mm.1	5.62	7.2	-2.98	0.1585	0.4234			NonCoding
TC0X00002756.mm.1	6.93	8.5	-2.98	0.1807	0.453	Gm9112	predicted gene 9112	Coding
TC0X00001881.mm.1	11.73	13.31	-2.98	0.0191	0.1327	Gm25202	predicted gene, 25202 [Source:MGI Symbol;Acc:MGI:5454979]	Small_RNA
TC0400002359.mm.1	9.6	11.18	-2.98	0.031	0.1747	Gm26254	predicted gene, 26254 [Source:MGI Symbol;Acc:MGI:5456031]	Small_RNA
TC0X00001907.mm.1	7.37	8.95	-2.98	0.0097	0.0889	n-R5s5	nuclear encoded rRNA 5S 5 [Source:MGI Symbol;Acc:MGI:4421739]	Ribosomal
TC0700004156.mm.1	6.35	7.93	-2.98	0.0464	0.2178	Snord14a	small nucleolar RNA, C/D box 14A	Small_RNA
TC0200004296.mm.1	13.37	14.95	-2.97	0.1329	0.3855	Rpl35a-ps4	ribosomal protein 35A, pseudogene 4	Pseudogene
TC0500003229.mm.1	13.37	14.95	-2.97	0.1329	0.3855	Rpl35a-ps6	ribosomal protein L35A, pseudogene 6	Pseudogene
TC1700001779.mm.1	13.37	14.95	-2.97	0.1329	0.3855	Rpl35a-ps3	ribosomal protein L35A, pseudogene 3	Pseudogene
TC0100000458.mm.1	9.04	10.61	-2.97	0.0268	0.1612	Gm26293	predicted gene, 26293 [Source:MGI Symbol;Acc:MGI:5456070]	Small_RNA
TC0200005349.mm.1	10.36	11.93	-2.97	0.1659	0.4337	Gm14308; Gm14430; Gm14434; 0610010B08Rik; Gm4724	predicted gene 14308 (Gm14308), mRNA.; predicted gene 14430 (Gm14430), mRNA.; predicted gene 14434 (Gm14434), mRNA.; RIKEN cDNA 0610010B08 gene (0610010B08Rik), mRNA.; predicted gene 4724 (Gm4724), mRNA.; predicted gene 14434; predicted gene 14308	Coding
TC0400000995.mm.1	8.2	9.76	-2.96	0.0555	0.2413	LOC100861936	PREDICTED: uncharacterized LOC100861936 (LOC100861936), miscRNA.	NonCoding
TC0200003841.mm.1	11.4	12.96	-2.96	0.2018	0.4793	Mir684-1	microRNA 684-1 (Mir684-1), microRNA.; microRNA 684-1	Multiple_Complex
TC0400000082.mm.1	11.45	13.02	-2.96	0.1882	0.4624	Mir684-2	microRNA 684-2; microRNA 684-2 (Mir684-2), microRNA.	Multiple_Complex
TC0X00000369.mm.1	11.15	12.71	-2.96	0.2277	0.5097	Gm4853	predicted pseudogene 4853	Multiple_Complex
TC1000002925.mm.1	6.69	8.25	-2.96	0.2012	0.4788			NonCoding
TC0400001989.mm.1	12.46	14.02	-2.96	0.3526	0.627	Rps15a-ps3	ribosomal protein S15A, pseudogene 3 [Source:MGI Symbol;Acc:MGI:3650886]	Multiple_Complex
TC0300001666.mm.1	6.73	8.29	-2.95	0.4168	0.6777	1810022K09Rik	RIKEN cDNA 1810022K09 gene	Coding
TC0200004654.mm.1	9.55	11.11	-2.95	0.2683	0.5516	Gm14284	predicted gene 14284 [Source:MGI Symbol;Acc:MGI:3650419]	Multiple_Complex
TC0500000412.mm.1	10.65	12.21	-2.95	0.1486	0.4098			NonCoding
TC0800003106.mm.1	13.57	15.12	-2.94	0.0243	0.1522	n-R5s102	nuclear encoded rRNA 5S 102 [Source:MGI Symbol;Acc:MGI:4421950]	Ribosomal
TC1600001338.mm.1	13.3	14.86	-2.94	0.0456	0.2158	Mir684-1; Gm10241	microRNA 684-1; predicted pseudogene 10241	Multiple_Complex
TC0X00001120.mm.1	7.28	8.84	-2.94	0.004	0.0529	Tex16	testis expressed gene 16	Coding
TC0200005346.mm.1	10.41	11.97	-2.94	0.1345	0.3881	Gm2004	predicted gene 2004	Coding
TC0X00003384.mm.1	7.48	9.03	-2.94	0.1308	0.3824	Ssxb9	synovial sarcoma, X member B, breakpoint 9	Coding
TC0900001787.mm.1	11.95	13.51	-2.94	0.2612	0.5445	Scarna9	small Cajal body-specific RNA 9	Small_RNA
TC1900000401.mm.1	13.78	15.33	-2.94	0.3972	0.6621	Gm3873	PREDICTED: predicted gene 3873 (Gm3873), mRNA.	Coding
TC1100003038.mm.1	5.86	7.41	-2.93	0.3211	0.6012	Gm22442	predicted gene, 22442 [Source:MGI Symbol;Acc:MGI:5452219]	Small_RNA
TC1100003479.mm.1	14.08	15.63	-2.93	0.0448	0.2137	Gm23137	predicted gene, 23137 [Source:MGI Symbol;Acc:MGI:5452914]	Small_RNA
TC0X00001791.mm.1	9.41	10.96	-2.93	0.1456	0.4052	Rpl22-ps1	ribosomal protein L22, pseudogene 1	Pseudogene
TC0200002741.mm.1	9.84	11.39	-2.93	0.2796	0.5623	Gm14295	predicted gene 14295	Coding
TC0900002270.mm.1	8.78	10.32	-2.92	0.25	0.5326	Tex12	testis expressed gene 12	Coding
TC1200000093.mm.1	5.14	6.69	-2.92	0.0448	0.2138	Rad51ap2	RAD51 associated protein 2	Coding
TC0X00003386.mm.1	6.47	8.01	-2.92	0.1306	0.3822	Ssx9	synovial sarcoma, X breakpoint 9; Synthetic construct Mus musculus clone IMAGE:100014880, MGC:180300 synovial sarcoma, X breakpoint 9 (Ssx9) mRNA, encodes complete protein.	Coding
TC0700002588.mm.1	11.56	13.11	-2.92	0.1569	0.421	Gm10175	predicted gene 10175 [Source:MGI Symbol;Acc:MGI:3704287]	Coding
TC0500000559.mm.1	10.6	12.14	-2.91	0.271	0.5539	Gm8121	predicted pseudogene 8121	Multiple_Complex
TC1700002250.mm.1	12.24	13.78	-2.91	0.0002	0.0083	Dazl	deleted in azoospermia-like; deleted in azoospermia-like (Dazl), mRNA.	Coding
TC0X00000853.mm.1	7.68	9.22	-2.91	0.1378	0.3926	Smek3-ps	SMEK homolog 3, suppressor of mek1 (Dictyostelium), pseudogene	Pseudogene
TC0X00003387.mm.1	6.98	8.52	-2.91	0.1246	0.3723	Ssxb5	synovial sarcoma, X member B, breakpoint 5; Synthetic construct Mus musculus clone IMAGE:100015789, MGC:183439 synovial sarcoma, X member B, breakpoint 5 (Ssxb5) mRNA, encodes complete protein.	Coding
TC0200000323.mm.1	11.71	13.25	-2.9	0.2767	0.5598			NonCoding
TC1100004026.mm.1	10.58	12.11	-2.9	0.2867	0.569			NonCoding
TC0100001913.mm.1	9.02	10.56	-2.9	0.0091	0.0862	Gm6104	predicted gene 6104 [Source:MGI Symbol;Acc:MGI:3648587]	Coding
TC1000002662.mm.1	12.31	13.85	-2.9	0.021	0.1394	Gm26180	predicted gene, 26180 [Source:MGI Symbol;Acc:MGI:5455957]	Small_RNA
TC1000002660.mm.1	10.18	11.71	-2.89	0.0491	0.225	Actr6	ARP6 actin-related protein 6	Coding
TC0200005373.mm.1	9.2	10.74	-2.89	0.0488	0.2242	Gm14325	predicted gene 14325	Multiple_Complex
TC1400001666.mm.1	14.98	16.51	-2.89	0.0082	0.0808	Snord69	small nucleolar RNA, C/D box 69	Small_RNA
TC0700000786.mm.1	8.14	9.67	-2.89	0.0055	0.0641	Klk1b11	kallikrein 1-related peptidase b11	Coding
TC1100001021.mm.1	9.18	10.71	-2.89	0.0105	0.0935	Spata22; Olfr20	spermatogenesis associated 22; olfactory receptor 20	Coding
TC0X00000875.mm.1	12.82	14.35	-2.89	0.3214	0.6014	Gm5941	predicted gene 5941	Coding
TC0600002213.mm.1	9.98	11.51	-2.89	0.1189	0.3632	Rpl35a-ps7	ribosomal protein L35A, pseudogene 7	Pseudogene
TC0700000785.mm.1	9.51	11.04	-2.89	0.0793	0.2927	Klk1b9	kallikrein 1-related peptidase b9	Coding
TC0X00003414.mm.1	7.7	9.23	-2.89	0.1938	0.4695	Ssxb6	synovial sarcoma, X member B, breakpoint 6	Coding
TC0800000849.mm.1	10.71	12.24	-2.89	0.0267	0.1608	Gm7984	predicted gene 7984 [Source:MGI Symbol;Acc:MGI:3645839]	Pseudogene
TC1500000853.mm.1	13.29	14.82	-2.89	0.0482	0.2229	Gm23144	predicted gene, 23144 [Source:MGI Symbol;Acc:MGI:5452921]	Small_RNA
TC0200003802.mm.1	11.38	12.91	-2.88	0.2031	0.481	Cyct	cytochrome c, testis	Coding
TC0100002953.mm.1	8.99	10.52	-2.88	0.0332	0.1817			NonCoding
TC0200002203.mm.1	14.45	15.98	-2.88	0.0917	0.3175	Cst9	cystatin 9	Coding
TC1700002110.mm.1	7.98	9.5	-2.88	0.0927	0.3191	Cenpq	centromere protein Q	Multiple_Complex
TC1600001551.mm.1	9.74	11.26	-2.88	0.1138	0.355	Gm5963	predicted pseudogene 5963	Pseudogene
TC1300001640.mm.1	12.99	14.51	-2.87	0.0045	0.0568	Hist1h4c	histone cluster 1, H4c	Coding
TC0300002528.mm.1	5.3	6.82	-2.87	0.0032	0.046	Gm22581	predicted gene, 22581 [Source:MGI Symbol;Acc:MGI:5452358]	Small_RNA
TC0500001128.mm.1	8.36	9.88	-2.87	0.063	0.2589	Zfp932	zinc finger protein 932	Multiple_Complex
TC0400000274.mm.1	13.01	14.53	-2.87	0.06	0.252	Gm11942	predicted gene 11942 [Source:MGI Symbol;Acc:MGI:3650608]	Multiple_Complex
TC1900000575.mm.1	11.73	13.25	-2.87	0.2837	0.566			NonCoding
TC0200003842.mm.1	14.21	15.73	-2.87	0.015	0.1163	Gm13690	predicted gene 13690	Pseudogene
TC0200002768.mm.1	9.25	10.77	-2.87	0.0211	0.1395	Gm14292	predicted gene 14292 [Source:MGI Symbol;Acc:MGI:3649964]	Pseudogene
TC1900001491.mm.1	11.71	13.23	-2.86	0.2899	0.5719			NonCoding
TC0900000876.mm.1	9.45	10.96	-2.86	0.2159	0.4962	Rps27l	ribosomal protein S27-like	Multiple_Complex
TC0800001325.mm.1	6.3	7.81	-2.85	0.1401	0.3958	Gm26132	predicted gene, 26132 [Source:MGI Symbol;Acc:MGI:5455909]	Small_RNA
TC0200000658.mm.1	9.48	10.99	-2.85	0.0475	0.2208	Mir684-1; Gm13430	microRNA 684-1 (Mir684-1), microRNA.; predicted gene 13430; microRNA 684-1	Multiple_Complex
TC0X00000095.mm.1	6.75	8.26	-2.85	0.1489	0.4102	Gm5751	predicted gene 5751	Coding
TC0100003696.mm.1	12.68	14.18	-2.84	0.045	0.2143	Gm23690	predicted gene, 23690 [Source:MGI Symbol;Acc:MGI:5453467]	Small_RNA
TC0200002738.mm.1	9.6	11.1	-2.84	0.1069	0.3441	Gm14431; Gm8898	predicted gene 14431 (Gm14431), transcript variant 2, mRNA.; predicted gene 8898; predicted gene 14431; predicted gene 8898 (Gm8898), transcript variant 1, mRNA.	Coding
TC0200005341.mm.1	9.6	11.1	-2.84	0.1069	0.3441	Gm14431; Gm8898; Gm4245	predicted gene 14431; predicted gene 8898 (Gm8898), transcript variant 2, mRNA.; predicted gene 14431 (Gm14431), transcript variant 1, mRNA.; predicted gene 8898; predicted gene 4245	Coding
TC0800002922.mm.1	11.57	13.08	-2.84	0.1007	0.3334	Gm23627	predicted gene, 23627 [Source:MGI Symbol;Acc:MGI:5453404]	Small_RNA
TC1200001911.mm.1	10.12	11.62	-2.84	0.0914	0.3166	4930447C04Rik	RIKEN cDNA 4930447C04 gene	Multiple_Complex
TC0400001284.mm.1	11.81	13.31	-2.84	0.003	0.044	Gm23287	predicted gene, 23287 [Source:MGI Symbol;Acc:MGI:5453064]	Small_RNA
TC0X00001866.mm.1	6.54	8.04	-2.84	0.0194	0.1336	n-R5s3	nuclear encoded rRNA 5S 3 [Source:MGI Symbol;Acc:MGI:4421737]	Ribosomal
TC1600001181.mm.1	12.48	13.98	-2.84	0.1632	0.4298	Gm10247	predicted gene 10247 [Source:MGI Symbol;Acc:MGI:3641838]	Pseudogene
TC0400003923.mm.1	7.5	9	-2.83	0.0467	0.2188	Gm13080	predicted gene 13080 [Source:MGI Symbol;Acc:MGI:3650235]	Multiple_Complex
TC0100003641.mm.1	14.01	15.51	-2.83	0.0603	0.2525	Gm25312	predicted gene, 25312 [Source:MGI Symbol;Acc:MGI:5455089]	Small_RNA
TC1000001174.mm.1	8.79	10.29	-2.83	0.2482	0.5312	Gm5426	predicted pseudogene 5426 [Source:MGI Symbol;Acc:MGI:3646788]	Pseudogene
TC1300001941.mm.1	9.06	10.56	-2.82	0.0318	0.1773	Mirlet7d	microRNA let7d	Multiple_Complex
TC1700000726.mm.1	7.41	8.91	-2.82	0.3936	0.6597	Gm10074	predicted gene 10074	Multiple_Complex
TC0900000329.mm.1	9.29	10.78	-2.82	0.0061	0.0679	Gm24262	predicted gene, 24262 [Source:MGI Symbol;Acc:MGI:5454039]	Small_RNA
TC0900003179.mm.1	12.14	13.63	-2.82	0.5769	0.7885	Rps27rt	ribosomal protein S27, retrogene	Coding
TC0X00000042.mm.1	5.97	7.47	-2.82	0.1781	0.4497	Gm14450	predicted gene 14450 [Source:MGI Symbol;Acc:MGI:3651431]	Multiple_Complex
TC0400002425.mm.1	11.36	12.86	-2.82	0.0323	0.179	Gm25581	predicted gene, 25581 [Source:MGI Symbol;Acc:MGI:5455358]	Small_RNA
TC0800002581.mm.1	4.98	6.47	-2.81	0.064	0.2611	Gm23626	predicted gene, 23626 [Source:MGI Symbol;Acc:MGI:5453403]	Small_RNA
TC0100002405.mm.1	10.79	12.28	-2.81	0.0737	0.2814	Sumo1	small ubiquitin-like modifier 1; SMT3 suppressor of mif two 3 homolog 1 (yeast)	Multiple_Complex
TC1400001987.mm.1	13.87	15.36	-2.81	0.1901	0.4648	Rpph1	ribonuclease P RNA component H1	NonCoding
TC0500000352.mm.1	10.24	11.73	-2.81	0.2021	0.4796	Rpl35a-ps5	ribosomal protein L35A, pseudogene 5	Pseudogene
TC1300001201.mm.1	6.77	8.25	-2.8	0.032	0.178	Smim15	small integral membrane protein 15	Multiple_Complex
TC1400002260.mm.1	7.59	9.07	-2.8	0.0018	0.0315	Esco2	establishment of cohesion 1 homolog 2 (S. cerevisiae)	Multiple_Complex
TC0700001918.mm.1	10.14	11.63	-2.8	0.5729	0.786	Fam24a	family with sequence similarity 24, member A	Coding
TC0X00000089.mm.1	7.1	8.59	-2.8	0.1657	0.4334	Ssxb10	synovial sarcoma, X member B, breakpoint 10	Coding
TC1400000103.mm.1	11.44	12.93	-2.8	0.0717	0.2771	Gm5457	predicted pseudogene 5457 [Source:MGI Symbol;Acc:MGI:3646665]	Pseudogene
TC1600000931.mm.1	12.21	13.69	-2.8	0.0436	0.2107	Gm24508	predicted gene, 24508 [Source:MGI Symbol;Acc:MGI:5454285]	Small_RNA
TC1600001614.mm.1	9.32	10.81	-2.8	0.2333	0.5153	Gm15530	predicted gene 15530 [Source:MGI Symbol;Acc:MGI:3782978]	Pseudogene
TC1700000353.mm.1	9.03	10.51	-2.8	0.001	0.0215	Meiob	meiosis specific with OB domains	Coding
TC1300001076.mm.1	11.38	12.86	-2.8	0.0243	0.1521	Snora47	small nucleolar RNA, H/ACA box 47	Multiple_Complex
TC0100003521.mm.1	11.9	13.38	-2.8	0.0975	0.3276	Gm2962	predicted pseudogene 2962 [Source:MGI Symbol;Acc:MGI:3781140]	Pseudogene
TC1500000578.mm.1	12.7	14.18	-2.79	0.1373	0.392	Gm19945	PREDICTED: predicted gene, 19945 (Gm19945), mRNA.	Coding
TC0100000008.mm.1	13.18	14.66	-2.79	0.0374	0.1929	Gm22307	predicted gene, 22307 [Source:MGI Symbol;Acc:MGI:5452084]	Small_RNA
TC0900002450.mm.1	14.18	15.66	-2.79	0.0694	0.2725	Rplp1	ribosomal protein, large, P1	Coding
TC0500001631.mm.1	11.46	12.94	-2.79	0.0924	0.3188	Gm16089	predicted gene 16089 [Source:MGI Symbol;Acc:MGI:3801884]	Multiple_Complex
TC0100000059.mm.1	12.5	13.98	-2.79	0.0562	0.2429	Gm22633	predicted gene, 22633 [Source:MGI Symbol;Acc:MGI:5452410]	Small_RNA
TC0100001937.mm.1	13.23	14.71	-2.79	0.139	0.3941	Gm15452	predicted gene 15452 [Source:MGI Symbol;Acc:MGI:3768636]	Multiple_Complex
TC1700001373.mm.1	8.88	10.36	-2.79	0.1216	0.3676	Gm10231	predicted pseudogene 10231	Pseudogene
TC1100000383.mm.1	9.35	10.83	-2.79	0.0022	0.0364	Pank3	pantothenate kinase 3	Multiple_Complex
TC0100001988.mm.1	14.37	15.84	-2.78	0.0146	0.1144	Smt3h2-ps4	SMT3 suppressor of mif two 3 homolog 2, pseudogene 4 (S. cerevisiae)	Pseudogene
TC0900002333.mm.1	8.62	10.09	-2.78	0.0293	0.1692	Etfa	electron transferring flavoprotein, alpha polypeptide	Multiple_Complex
TC1100003212.mm.1	13.28	14.75	-2.78	0.016	0.1202	Gm12335	predicted gene 12335 [Source:MGI Symbol;Acc:MGI:3650727]	Pseudogene
TC0200002231.mm.1	10.65	12.12	-2.78	0.0173	0.1254	Gm23598	predicted gene, 23598 [Source:MGI Symbol;Acc:MGI:5453375]	Small_RNA
TC0400003547.mm.1	6.59	8.06	-2.77	0.3523	0.6268	Gm12936	predicted gene 12936 [Source:MGI Symbol;Acc:MGI:3651145]	Multiple_Complex
TC1600000929.mm.1	14.15	15.62	-2.77	0.0544	0.2386	Gm23355	predicted gene, 23355 [Source:MGI Symbol;Acc:MGI:5453132]	Small_RNA
TC0400002631.mm.1	4.98	6.45	-2.77	0.0634	0.2596	Gm24573	predicted gene, 24573 [Source:MGI Symbol;Acc:MGI:5454350]	Ribosomal
TC0700000830.mm.1	7.6	9.07	-2.77	0.5026	0.7385	LOC100861642	PREDICTED: uncharacterized LOC100861642 (LOC100861642), miscRNA.	NonCoding
TC0X00000507.mm.1	10.31	11.77	-2.77	0.3401	0.6176	Gm14626	predicted gene 14626 [Source:MGI Symbol;Acc:MGI:3709652]	Multiple_Complex
TC1700000199.mm.1	8.83	10.3	-2.77	0.0276	0.1638	Gm6712	PREDICTED: predicted gene 6712 (Gm6712), miscRNA.	Multiple_Complex
TC0600000536.mm.1	15.85	17.32	-2.76	0.0154	0.1182	Rny3	RNA, Y3 small cytoplasmic (associated with Ro protein)	NonCoding
TSUnmapped00000180.mm.1	15.85	17.32	-2.76	0.0154	0.1182	Rny3	RNA, Y3 small cytoplasmic (associated with Ro protein)	Small_RNA
TC0600000134.mm.1	8.62	10.08	-2.76	0.0451	0.2145	Capza2	capping protein (actin filament) muscle Z-line, alpha 2	Multiple_Complex
TC0300000182.mm.1	9.6	11.07	-2.76	0.5281	0.7566	Rpl22l1	ribosomal protein L22 like 1	Coding
TC0200002755.mm.1	9.06	10.52	-2.76	0.1483	0.4092	Etohi1	ethanol induced 1	Coding
TC0200005339.mm.1	9.35	10.81	-2.76	0.1719	0.4418	Gm14308; Gm14430; Gm14434; 0610010B08Rik; Gm4724	predicted gene 14308 (Gm14308), mRNA.; predicted gene 14430 (Gm14430), mRNA.; predicted gene 14434; RIKEN cDNA 0610010B08 gene; predicted gene 4724	Multiple_Complex
TC0200001184.mm.1	6.47	7.94	-2.76	0.217	0.4976	Gm13755	predicted gene 13755 [Source:MGI Symbol;Acc:MGI:3651210]	Multiple_Complex
TC0200002749.mm.1	9.47	10.94	-2.76	0.0819	0.2978	Gm14403	predicted gene 14403	Multiple_Complex
TC1200002099.mm.1	6.82	8.29	-2.75	0.0292	0.1689	n-R5s64	nuclear encoded rRNA 5S 64 [Source:MGI Symbol;Acc:MGI:4421909]	Ribosomal
TC1100001264.mm.1	5.65	7.11	-2.75	0.0031	0.0454	Wfdc17	WAP four-disulfide core domain 17	Coding
TC1700001139.mm.1	4.72	6.18	-2.75	0.0452	0.2148	Snord92	small nucleolar RNA, C/D box 92	Small_RNA
TC0200003492.mm.1	8.14	9.6	-2.75	0.097	0.3266	Orc4	origin recognition complex, subunit 4	Multiple_Complex
TC0500000047.mm.1	6.59	8.05	-2.75	0.0089	0.0849	Gm23993	predicted gene, 23993 [Source:MGI Symbol;Acc:MGI:5453770]	Small_RNA
TC1700001499.mm.1	11.51	12.97	-2.75	0.1153	0.3578	Psmb1	proteasome (prosome, macropain) subunit, beta type 1	Coding
TC0X00000476.mm.1	6.38	7.84	-2.75	0.3788	0.6472	Etd	embryonic testis differentiation	Multiple_Complex
TC1800001627.mm.1	7.12	8.58	-2.75	0.1262	0.3752			NonCoding
TC0100002105.mm.1	7.46	8.92	-2.75	0.4184	0.6789	Gm7846	predicted gene 7846 [Source:MGI Symbol;Acc:MGI:3645212]	Multiple_Complex
TC0X00001206.mm.1	8.81	10.27	-2.74	0.0164	0.1219	Gm2411	PREDICTED: predicted gene 2411 (Gm2411), mRNA.	Coding
TC0200002719.mm.1	9.6	11.06	-2.74	0.2031	0.4809	Gm14288; Gm14440	predicted gene 14288; predicted gene 14440 (Gm14440), mRNA.; predicted gene 14440	Multiple_Complex
TC0900001598.mm.1	6.14	7.6	-2.74	0.0117	0.0999	Snora62	small nucleolar RNA, H/ACA box 62	Small_RNA
TC0300002170.mm.1	9.54	10.99	-2.74	0.1237	0.3711	Pdcd10	programmed cell death 10	Multiple_Complex
TC0500000230.mm.1	7.62	9.07	-2.74	0.0358	0.1893	Hspe1-ps3	heat shock protein 1 (chaperonin 10), pseudogene 3	Multiple_Complex
TSUnmapped00000174.mm.1	16.67	18.13	-2.74	0.0159	0.1196	Rn5s	5S RNA	Ribosomal
TSUnmapped00000168.mm.1	16.67	18.13	-2.74	0.0159	0.1196	n-R5s100	nuclear encoded rRNA 5S 100	Ribosomal
TSUnmapped00000167.mm.1	16.67	18.13	-2.74	0.0159	0.1196	n-R5s103	nuclear encoded rRNA 5S 103	Ribosomal
TSUnmapped00000166.mm.1	16.67	18.13	-2.74	0.0159	0.1196	n-R5s104	nuclear encoded rRNA 5S 104	Ribosomal
TSUnmapped00000165.mm.1	16.67	18.13	-2.74	0.0159	0.1196	n-R5s105	nuclear encoded rRNA 5S 105	Ribosomal
TSUnmapped00000164.mm.1	16.67	18.13	-2.74	0.0159	0.1196	n-R5s108	nuclear encoded rRNA 5S 108	Ribosomal
TSUnmapped00000163.mm.1	16.67	18.13	-2.74	0.0159	0.1196	n-R5s110	nuclear encoded rRNA 5S 110	Ribosomal
TSUnmapped00000162.mm.1	16.67	18.13	-2.74	0.0159	0.1196	n-R5s111	nuclear encoded rRNA 5S 111	Ribosomal
TSUnmapped00000161.mm.1	16.67	18.13	-2.74	0.0159	0.1196	n-R5s113	nuclear encoded rRNA 5S 113	Ribosomal
TSUnmapped00000159.mm.1	16.67	18.13	-2.74	0.0159	0.1196	n-R5s117	nuclear encoded rRNA 5S 117	Ribosomal
TSUnmapped00000158.mm.1	16.67	18.13	-2.74	0.0159	0.1196	n-R5s121	nuclear encoded rRNA 5S 121	Ribosomal
TSUnmapped00000157.mm.1	16.67	18.13	-2.74	0.0159	0.1196	n-R5s122	nuclear encoded rRNA 5S 122	Ribosomal
TSUnmapped00000156.mm.1	16.67	18.13	-2.74	0.0159	0.1196	n-R5s123	nuclear encoded rRNA 5S 123	Ribosomal
TSUnmapped00000155.mm.1	16.67	18.13	-2.74	0.0159	0.1196	n-R5s124	nuclear encoded rRNA 5S 124	Ribosomal
TSUnmapped00000154.mm.1	16.67	18.13	-2.74	0.0159	0.1196	n-R5s128	nuclear encoded rRNA 5S 128	Ribosomal
TSUnmapped00000152.mm.1	16.67	18.13	-2.74	0.0159	0.1196	n-R5s133	nuclear encoded rRNA 5S 133	Ribosomal
TSUnmapped00000151.mm.1	16.67	18.13	-2.74	0.0159	0.1196	n-R5s134	nuclear encoded rRNA 5S 134	Ribosomal
TSUnmapped00000150.mm.1	16.67	18.13	-2.74	0.0159	0.1196	n-R5s138	nuclear encoded rRNA 5S 138	Ribosomal
TSUnmapped00000149.mm.1	16.67	18.13	-2.74	0.0159	0.1196	n-R5s139	nuclear encoded rRNA 5S 139	Ribosomal
TSUnmapped00000147.mm.1	16.67	18.13	-2.74	0.0159	0.1196	n-R5s141	nuclear encoded rRNA 5S 141	Ribosomal
TSUnmapped00000146.mm.1	16.67	18.13	-2.74	0.0159	0.1196	n-R5s142	nuclear encoded rRNA 5S 142	Ribosomal
TSUnmapped00000145.mm.1	16.67	18.13	-2.74	0.0159	0.1196	n-R5s143	nuclear encoded rRNA 5S 143	Ribosomal
TSUnmapped00000144.mm.1	16.67	18.13	-2.74	0.0159	0.1196	n-R5s144	nuclear encoded rRNA 5S 144	Ribosomal
TSUnmapped00000142.mm.1	16.67	18.13	-2.74	0.0159	0.1196	n-R5s146	nuclear encoded rRNA 5S 146	Ribosomal
TSUnmapped00000139.mm.1	16.67	18.13	-2.74	0.0159	0.1196	n-R5s149	nuclear encoded rRNA 5S 149	Ribosomal
TSUnmapped00000148.mm.1	16.67	18.13	-2.74	0.0159	0.1196	Gm22109	predicted gene, 22109	Ribosomal
TSUnmapped00000141.mm.1	16.67	18.13	-2.74	0.0159	0.1196	Gm22291	predicted gene, 22291	Ribosomal
TSUnmapped00000140.mm.1	16.67	18.13	-2.74	0.0159	0.1196	Gm23284	predicted gene, 23284	Ribosomal
TSUnmapped00000160.mm.1	16.67	18.13	-2.74	0.0159	0.1196	Gm25018	predicted gene, 25018	Ribosomal
TSUnmapped00000143.mm.1	16.67	18.13	-2.74	0.0159	0.1196	Gm25212	predicted gene, 25212	Ribosomal
TSUnmapped00000153.mm.1	16.67	18.13	-2.74	0.0159	0.1196	Gm26391	predicted gene, 26391	Ribosomal
TC0X00002249.mm.1	5.61	7.06	-2.74	0.7939	0.9109			NonCoding
TC0300002802.mm.1	10.14	11.6	-2.74	0.0558	0.242	Vcam1	vascular cell adhesion molecule 1	Coding
TC0200004987.mm.1	10.03	11.48	-2.73	0.1238	0.3712	Gm14253	predicted gene 14253	Pseudogene
TC0600002015.mm.1	14.56	16.01	-2.73	0.0286	0.1669	Gm13835	predicted gene 13835	Pseudogene
TC0200002722.mm.1	9.91	11.36	-2.73	0.1875	0.4615	Gm14308; Gm14430; Gm14434; 0610010B08Rik; Gm4724; Gm11007	predicted gene 14308 (Gm14308), mRNA.; predicted gene 14430 (Gm14430), mRNA.; predicted gene 14434 (Gm14434), mRNA.; RIKEN cDNA 0610010B08 gene (0610010B08Rik), mRNA.; predicted gene 4724 (Gm4724), mRNA.; predicted gene 11007; RIKEN cDNA 0610010B08 gene	Coding
TC1700002430.mm.1	8.76	10.21	-2.73	0.085	0.3044	Gm10495	PREDICTED: predicted gene 10495 (Gm10495), mRNA.	Coding
TC1500001702.mm.1	10.79	12.24	-2.73	0.293	0.5751	Gm3244	predicted pseudogene 3244	Pseudogene
TC0800003110.mm.1	15.62	17.07	-2.73	0.0102	0.0917	n-R5s106	nuclear encoded rRNA 5S 106 [Source:MGI Symbol;Acc:MGI:4421954]	Ribosomal
TC0800003122.mm.1	15.62	17.07	-2.73	0.0102	0.0917	n-R5s118	nuclear encoded rRNA 5S 118 [Source:MGI Symbol;Acc:MGI:4421968]	Ribosomal
TC0800003134.mm.1	15.62	17.07	-2.73	0.0102	0.0917	n-R5s130	nuclear encoded rRNA 5S 130 [Source:MGI Symbol;Acc:MGI:4421986]	Ribosomal
TC0800003130.mm.1	15.62	17.07	-2.73	0.0102	0.0917	Gm24312	predicted gene, 24312 [Source:MGI Symbol;Acc:MGI:5454089]	Ribosomal
TC0200002731.mm.1	9.89	11.34	-2.73	0.1448	0.4036	Gm2026	predicted gene 2026 [Source:MGI Symbol;Acc:MGI:3780195]; predicted gene 2026	Coding
TC0X00003415.mm.1	7.2	8.65	-2.73	0.1106	0.3502	Ssxb3	synovial sarcoma, X member B, breakpoint 3	Coding
TC0100000285.mm.1	9.99	11.44	-2.72	0.017	0.1245	Gm24826	predicted gene, 24826 [Source:MGI Symbol;Acc:MGI:5454603]	Multiple_Complex
TC0100000395.mm.1	8.34	9.79	-2.72	0.0685	0.2706	Hspe1	heat shock protein 1 (chaperonin 10)	Multiple_Complex
TC1300000762.mm.1	14.13	15.58	-2.72	0.0729	0.2796	Gm25448	predicted gene, 25448 [Source:MGI Symbol;Acc:MGI:5455225]	Small_RNA
TC1500001252.mm.1	14.13	15.58	-2.72	0.0729	0.2796	Gm24713	predicted gene, 24713 [Source:MGI Symbol;Acc:MGI:5454490]	Small_RNA
TC1700001921.mm.1	14.4	15.84	-2.72	0.0348	0.1862	Gm24389	predicted gene, 24389 [Source:MGI Symbol;Acc:MGI:5454166]	Small_RNA
TC1400002056.mm.1	14.4	15.84	-2.72	0.0348	0.1862	Gm24424	predicted gene, 24424 [Source:MGI Symbol;Acc:MGI:5454201]	Small_RNA
TC0900002769.mm.1	14.4	15.84	-2.72	0.0348	0.1862	Gm24864	predicted gene, 24864	Small_RNA
TC0600000130.mm.1	14.4	15.84	-2.72	0.0348	0.1862	Gm25021	predicted gene, 25021 [Source:MGI Symbol;Acc:MGI:5454798]	Small_RNA
TC0300002331.mm.1	14.4	15.84	-2.72	0.0348	0.1862	Gm26465	predicted gene, 26465 [Source:MGI Symbol;Acc:MGI:5456242]	Small_RNA
TC1300001396.mm.1	12.21	13.66	-2.72	0.1563	0.4201	Gm10029	predicted gene 10029	Pseudogene
TC0200000738.mm.1	8.33	9.78	-2.72	0.2672	0.5508			NonCoding
TC0X00000092.mm.1	6.45	7.9	-2.72	0.1277	0.3778	Gm6797	predicted pseudogene 6797	Pseudogene
TC0200005020.mm.1	12.56	14.01	-2.72	0.1729	0.4429	Gm14279	predicted gene 14279	Pseudogene
TC0200005350.mm.1	9.63	11.08	-2.72	0.1908	0.4656	Gm14308; Gm14430; Gm14434; 0610010B08Rik; Gm4724	predicted gene 14308 (Gm14308), mRNA.; predicted gene 14430 (Gm14430), mRNA.; predicted gene 14434 (Gm14434), mRNA.; RIKEN cDNA 0610010B08 gene (0610010B08Rik), mRNA.; predicted gene 4724 (Gm4724), mRNA.; predicted gene 14308	Multiple_Complex
TC0200003507.mm.1	9.13	10.57	-2.72	0.1373	0.392	Gm13487	predicted gene 13487 [Source:MGI Symbol;Acc:MGI:3650141]	Multiple_Complex
TC0X00001316.mm.1	7.45	8.89	-2.71	0.004	0.0528	Arxes2	adipocyte-related X-chromosome expressed sequence 2	Coding
TC0X00000506.mm.1	14.32	15.76	-2.71	0.3006	0.5814	Gm6664	predicted gene 6664	Pseudogene
TC0300000677.mm.1	7.27	8.71	-2.71	0.0071	0.075	Gm25188	predicted gene, 25188 [Source:MGI Symbol;Acc:MGI:5454965]	Small_RNA
TC0200005489.mm.1	9.52	10.96	-2.71	0.1634	0.4302	Gm14306	predicted gene 14306 [Source:MGI Symbol;Acc:MGI:3805542]; predicted gene 14306	Coding
TC0X00000732.mm.1	6.83	8.27	-2.71	0.0188	0.1318	Xlr4e-ps	X-linked lymphocyte-regulated 4E, pseudogene	Pseudogene
TC0800003139.mm.1	16.59	18.03	-2.71	0.0189	0.1318	Rn5s	5S RNA	Ribosomal
TC0800003104.mm.1	16.59	18.03	-2.71	0.0189	0.1318	n-R5s100	nuclear encoded rRNA 5S 100	Ribosomal
TC0800003107.mm.1	16.59	18.03	-2.71	0.0189	0.1318	n-R5s103	nuclear encoded rRNA 5S 103	Ribosomal
TC0800003108.mm.1	16.59	18.03	-2.71	0.0189	0.1318	n-R5s104	nuclear encoded rRNA 5S 104	Ribosomal
TC0800003109.mm.1	16.59	18.03	-2.71	0.0189	0.1318	n-R5s105	nuclear encoded rRNA 5S 105	Ribosomal
TC0800003111.mm.1	16.59	18.03	-2.71	0.0189	0.1318	n-R5s107	nuclear encoded rRNA 5S 107 [Source:MGI Symbol;Acc:MGI:4421955]	Ribosomal
TC0800003112.mm.1	16.59	18.03	-2.71	0.0189	0.1318	n-R5s108	nuclear encoded rRNA 5S 108	Ribosomal
TC0800003114.mm.1	16.59	18.03	-2.71	0.0189	0.1318	n-R5s110	nuclear encoded rRNA 5S 110	Ribosomal
TC0800003115.mm.1	16.59	18.03	-2.71	0.0189	0.1318	n-R5s111	nuclear encoded rRNA 5S 111	Ribosomal
TC0800003117.mm.1	16.59	18.03	-2.71	0.0189	0.1318	n-R5s113	nuclear encoded rRNA 5S 113	Ribosomal
TC0800003121.mm.1	16.59	18.03	-2.71	0.0189	0.1318	n-R5s117	nuclear encoded rRNA 5S 117	Ribosomal
TC0800003125.mm.1	16.59	18.03	-2.71	0.0189	0.1318	n-R5s121	nuclear encoded rRNA 5S 121	Ribosomal
TC0800003126.mm.1	16.59	18.03	-2.71	0.0189	0.1318	n-R5s122	nuclear encoded rRNA 5S 122	Ribosomal
TC0800003127.mm.1	16.59	18.03	-2.71	0.0189	0.1318	n-R5s123	nuclear encoded rRNA 5S 123	Ribosomal
TC0800003128.mm.1	16.59	18.03	-2.71	0.0189	0.1318	n-R5s124	nuclear encoded rRNA 5S 124	Ribosomal
TC0800003132.mm.1	16.59	18.03	-2.71	0.0189	0.1318	n-R5s128	nuclear encoded rRNA 5S 128	Ribosomal
TC0800003137.mm.1	16.59	18.03	-2.71	0.0189	0.1318	n-R5s133	nuclear encoded rRNA 5S 133	Ribosomal
TC0800003138.mm.1	16.59	18.03	-2.71	0.0189	0.1318	n-R5s134	nuclear encoded rRNA 5S 134	Ribosomal
TC0800003142.mm.1	16.59	18.03	-2.71	0.0189	0.1318	n-R5s138	nuclear encoded rRNA 5S 138	Ribosomal
TC0800003143.mm.1	16.59	18.03	-2.71	0.0189	0.1318	n-R5s139	nuclear encoded rRNA 5S 139	Ribosomal
TC0800003145.mm.1	16.59	18.03	-2.71	0.0189	0.1318	n-R5s141	nuclear encoded rRNA 5S 141	Ribosomal
TC0800003146.mm.1	16.59	18.03	-2.71	0.0189	0.1318	n-R5s142	nuclear encoded rRNA 5S 142	Ribosomal
TC0800003147.mm.1	16.59	18.03	-2.71	0.0189	0.1318	n-R5s143	nuclear encoded rRNA 5S 143	Ribosomal
TC0800003148.mm.1	16.59	18.03	-2.71	0.0189	0.1318	n-R5s144	nuclear encoded rRNA 5S 144	Ribosomal
TC0800003150.mm.1	16.59	18.03	-2.71	0.0189	0.1318	n-R5s146	nuclear encoded rRNA 5S 146	Ribosomal
TC0800003153.mm.1	16.59	18.03	-2.71	0.0189	0.1318	n-R5s149	nuclear encoded rRNA 5S 149	Ribosomal
TC0800003144.mm.1	16.59	18.03	-2.71	0.0189	0.1318	Gm22109; Rn5s23	predicted gene, 22109 [Source:MGI Symbol;Acc:MGI:5451886]; 5S RNA 23 (Rn5s23), ribosomal RNA.	Ribosomal
TC0800003151.mm.1	16.59	18.03	-2.71	0.0189	0.1318	Gm22291; Rn5s30	predicted gene, 22291 [Source:MGI Symbol;Acc:MGI:5452068]; 5S RNA 30 (Rn5s30), ribosomal RNA.	Ribosomal
TC0800003152.mm.1	16.59	18.03	-2.71	0.0189	0.1318	Gm23284; Rn5s31	predicted gene, 23284 [Source:MGI Symbol;Acc:MGI:5453061]; 5S RNA 31 (Rn5s31), ribosomal RNA.	Ribosomal
TC0800003120.mm.1	16.59	18.03	-2.71	0.0189	0.1318	Gm25018; Rn5s10	predicted gene, 25018 [Source:MGI Symbol;Acc:MGI:5454795]; 5S RNA 10 (Rn5s10), ribosomal RNA.	Ribosomal
TC0800003149.mm.1	16.59	18.03	-2.71	0.0189	0.1318	Gm25212; Rn5s28	predicted gene, 25212 [Source:MGI Symbol;Acc:MGI:5454989]; 5S RNA 28 (Rn5s28), ribosomal RNA.	Ribosomal
TC0800003136.mm.1	16.59	18.03	-2.71	0.0189	0.1318	Gm26391; Rn5s17	predicted gene, 26391 [Source:MGI Symbol;Acc:MGI:5456168]; 5S RNA 17 (Rn5s17), ribosomal RNA.	Ribosomal
TC0500001647.mm.1	4.62	6.05	-2.7	0.043	0.2091	Gm22956	predicted gene, 22956 [Source:MGI Symbol;Acc:MGI:5452733]	Small_RNA
TC0X00001623.mm.1	6.91	8.35	-2.7	0.0019	0.0327			NonCoding
TC0900002824.mm.1	10.54	11.98	-2.7	0.1959	0.4721	Gm16200	predicted gene 16200 [Source:MGI Symbol;Acc:MGI:3801928]	Pseudogene
TC0200000616.mm.1	12.24	13.68	-2.7	0.0602	0.2523	Gm13408	predicted gene 13408 [Source:MGI Symbol;Acc:MGI:3649613]	Pseudogene
TC1300001211.mm.1	11.74	13.17	-2.7	0.0693	0.2724	Rps3a3	ribosomal protein S3A3 [Source:MGI Symbol;Acc:MGI:3643406]	Coding
TC1100001481.mm.1	12.43	13.86	-2.7	0.0128	0.1058	Gm24949	predicted gene, 24949 [Source:MGI Symbol;Acc:MGI:5454726]	Multiple_Complex
TC1400000130.mm.1	8.68	10.11	-2.69	5.03e-05	0.003	Top2b	topoisomerase (DNA) II beta	Multiple_Complex
TC0X00000488.mm.1	12.58	14.01	-2.69	0.0426	0.208	Gm22550	predicted gene, 22550 [Source:MGI Symbol;Acc:MGI:5452327]	Small_RNA
TC1100000959.mm.1	10.8	12.23	-2.69	0.0045	0.0566	4930544D05Rik	RIKEN cDNA 4930544D05 gene	Multiple_Complex
TC0200001525.mm.1	10.55	11.98	-2.69	0.0492	0.225	Gm23731	predicted gene, 23731 [Source:MGI Symbol;Acc:MGI:5453508]	Small_RNA
TC0700000888.mm.1	13.17	14.6	-2.69	0.057	0.2446	Gm25326	predicted gene, 25326 [Source:MGI Symbol;Acc:MGI:5455103]	Small_RNA
TC0100003876.mm.1	11.09	12.52	-2.69	0.0705	0.2749	Tex30	testis expressed 30	Multiple_Complex
TC0200002753.mm.1	9.25	10.68	-2.69	0.2406	0.5234	Gm14327	predicted gene 14327	Multiple_Complex
TC0X00000724.mm.1	7.12	8.55	-2.69	0.0193	0.1335	Xlr4d-ps	X-linked lymphocyte-regulated 4D, pseudogene	Pseudogene
TC1600001489.mm.1	15.42	16.85	-2.69	0.0062	0.0684	Gm24879	predicted gene, 24879 [Source:MGI Symbol;Acc:MGI:5454656]	Small_RNA
TC1600001504.mm.1	10.47	11.9	-2.69	0.0137	0.1102	Gm25848	predicted gene, 25848 [Source:MGI Symbol;Acc:MGI:5455625]	Small_RNA
TC0X00001246.mm.1	9.72	11.14	-2.69	0.1989	0.4762	4921511C20Rik	high density lipoprotein (HDL) binding protein pseudogene	Multiple_Complex
TC0100000401.mm.1	7.63	9.05	-2.69	0.4591	0.7078			NonCoding
TC0X00001986.mm.1	14.13	15.56	-2.68	0.3373	0.6152	Gm6113	predicted gene 6113 [Source:MGI Symbol;Acc:MGI:3646518]	Pseudogene
TC0200002724.mm.1	9.49	10.91	-2.68	0.2297	0.5118	Gm14308; Gm14430; Gm14434; 0610010B08Rik; Gm4724; Gm11007; Gm2007	predicted gene 14308 (Gm14308), mRNA.; predicted gene 14430 (Gm14430), mRNA.; predicted gene 14434 (Gm14434), mRNA.; RIKEN cDNA 0610010B08 gene (0610010B08Rik), mRNA.; predicted gene 4724 (Gm4724), mRNA.; predicted gene 11007; predicted gene 2007; predicted gene 14308	Multiple_Complex
TC1900000582.mm.1	8.28	9.71	-2.68	0.0122	0.1022	Zfp518a; Mir8092	zinc finger protein 518A; microRNA 8092; zinc finger protein 518A (Zfp518a), mRNA.	Multiple_Complex
TC0X00001567.mm.1	10.24	11.66	-2.68	0.3153	0.5961	Gm5646	predicted pseudogene 5646	Pseudogene
TC1900000560.mm.1	8.44	9.86	-2.68	0.0165	0.1223	Hells	helicase, lymphoid specific	Multiple_Complex
TC0200002720.mm.1	9.38	10.8	-2.68	0.085	0.3044	Gm14431; Gm8898; Gm4723	predicted gene 14431 (Gm14431), transcript variant 2, mRNA.; predicted gene 8898 (Gm8898), transcript variant 2, mRNA.; predicted gene 14431 (Gm14431), transcript variant 1, mRNA.; predicted gene 8898 (Gm8898), transcript variant 1, mRNA.; predicted gene 4723; predicted gene 14431; predicted gene 8898	Coding
TC0200002406.mm.1	10.9	12.32	-2.68	0.2547	0.5378	Gm14277	predicted gene 14277	Multiple_Complex
TC1600001838.mm.1	12.29	13.71	-2.68	0.1572	0.4215	Zfp654	zinc finger protein 654	Multiple_Complex
TC0X00001970.mm.1	14.07	15.48	-2.67	0.4343	0.6901	Gm2768	predicted gene 2768 [Source:MGI Symbol;Acc:MGI:3780937]	Multiple_Complex
TC1100002928.mm.1	10.8	12.22	-2.67	0.0556	0.2415	Gm23721	predicted gene, 23721 [Source:MGI Symbol;Acc:MGI:5453498]	Small_RNA
TC1500001925.mm.1	8.12	9.54	-2.67	0.1097	0.3491	Gm18284	predicted gene, 18284 [Source:MGI Symbol;Acc:MGI:5010469]	Multiple_Complex
TC0200000684.mm.1	13.79	15.21	-2.67	0.037	0.1917	Gm22306	predicted gene, 22306 [Source:MGI Symbol;Acc:MGI:5452083]	Small_RNA
TC1400002521.mm.1	12.72	14.14	-2.67	0.0486	0.224	Rps3a2	ribosomal protein S3A2 [Source:MGI Symbol;Acc:MGI:3642853]	Coding
TC1600000974.mm.1	12.79	14.2	-2.67	0.1123	0.3528	Gm7735	predicted gene 7735 [Source:MGI Symbol;Acc:MGI:3649168]	Coding
TC0200005342.mm.1	9.08	10.5	-2.67	0.1981	0.4752	Gm14288; Gm14440	predicted gene 14288 (Gm14288), mRNA.; predicted gene 14440; predicted gene 14288	Coding
TC1400001298.mm.1	7.38	8.8	-2.67	0.5138	0.7468			NonCoding
TC0700000630.mm.1	11.61	13.03	-2.67	0.1297	0.3807	Gm12778	predicted gene 12778 [Source:MGI Symbol;Acc:MGI:3649899]	Pseudogene
TC1600000971.mm.1	12	13.42	-2.67	0.0932	0.32	Gm6358	predicted gene 6358 [Source:MGI Symbol;Acc:MGI:3643237]	Coding
TC1700000194.mm.1	10.22	11.64	-2.67	0.0109	0.0955	Zfp960	zinc finger protein 960	Coding
TC0200002732.mm.1	9.82	11.24	-2.67	0.2071	0.4859	Gm11008; RP23-83O23.1	predicted gene 11008 [Source:MGI Symbol;Acc:MGI:3779224]; novel transcript	NonCoding
TC0900000350.mm.1	10.47	11.89	-2.67	0.4834	0.7248	Gm26787; RP24-570C10.5	predicted gene, 26787 [Source:MGI Symbol;Acc:MGI:5477281]; novel transcript, antisense to Ei24	NonCoding
TC0X00000570.mm.1	12.56	13.97	-2.67	0.0424	0.2073	Gm25412	predicted gene, 25412 [Source:MGI Symbol;Acc:MGI:5455189]	Small_RNA
TC0500001331.mm.1	7.74	9.15	-2.66	0.0297	0.1707	n-R5s176	nuclear encoded rRNA 5S 176 [Source:MGI Symbol;Acc:MGI:4422041]	Ribosomal
TC0200004567.mm.1	5.73	7.14	-2.66	0.1334	0.3863	1500011K16Rik	RIKEN cDNA 1500011K16 gene	NonCoding
TSUnmapped00000138.mm.1	15.57	16.98	-2.66	0.0384	0.1959	n-R5s136	nuclear encoded rRNA 5S 136	Ribosomal
TC1900000901.mm.1	12.23	13.64	-2.66	0.0169	0.1237	Gm23927	predicted gene, 23927 [Source:MGI Symbol;Acc:MGI:5453704]	Multiple_Complex
TC0900002506.mm.1	9.37	10.78	-2.66	0.0107	0.0947	Rnu5g	RNA, U5G small nuclear	Small_RNA
TSUnmapped00000170.mm.1	9.37	10.78	-2.66	0.0107	0.0947	Rnu5g	RNA, U5G small nuclear	Small_RNA
TC0Y00000403.mm.1	13.21	14.62	-2.66	0.1562	0.42			NonCoding
TC1100001042.mm.1	11.83	13.23	-2.65	0.0922	0.3183	n-R5s71	nuclear encoded rRNA 5S 71 [Source:MGI Symbol;Acc:MGI:4421916]	Ribosomal
TC1100002244.mm.1	13.23	14.64	-2.65	0.0385	0.1962	Gm25698	predicted gene, 25698 [Source:MGI Symbol;Acc:MGI:5455475]	Small_RNA
TC0700003469.mm.1	14.44	15.85	-2.65	0.0305	0.1731	Gm23815	predicted gene, 23815 [Source:MGI Symbol;Acc:MGI:5453592]	Small_RNA
TC0200005364.mm.1	11	12.41	-2.65	0.123	0.3698	Gm14412	predicted gene 14412 [Source:MGI Symbol;Acc:MGI:3652251]	Coding
TC0100002355.mm.1	9.91	11.32	-2.65	0.2093	0.4884	Gm6822	predicted pseudogene 6822	Pseudogene
TC0800003140.mm.1	15.58	16.99	-2.65	0.0396	0.1992	n-R5s136	nuclear encoded rRNA 5S 136	Ribosomal
TC0900003081.mm.1	14.38	15.79	-2.64	0.0656	0.2644	Gm22821	predicted gene, 22821 [Source:MGI Symbol;Acc:MGI:5452598]	Small_RNA
TC0900003083.mm.1	14.38	15.79	-2.64	0.0656	0.2644	Gm25484	predicted gene, 25484 [Source:MGI Symbol;Acc:MGI:5455261]	Small_RNA
TC0900003084.mm.1	14.38	15.79	-2.64	0.0656	0.2644	Gm24641	predicted gene, 24641 [Source:MGI Symbol;Acc:MGI:5454418]	Small_RNA
TC0300001811.mm.1	8.48	9.89	-2.64	0.0294	0.1696	Gm24780	predicted gene, 24780 [Source:MGI Symbol;Acc:MGI:5454557]	Small_RNA
TC0X00001978.mm.1	14.36	15.76	-2.63	0.3754	0.6452	Gm5168	predicted gene 5168	Coding
TC1300002236.mm.1	12.18	13.58	-2.63	0.0644	0.2621	Uqcrb	ubiquinol-cytochrome c reductase binding protein	Multiple_Complex
TC0400001310.mm.1	12.16	13.56	-2.63	0.2275	0.5094			NonCoding
TC0500000209.mm.1	14.35	15.75	-2.63	0.0357	0.1891	Gm9836	predicted pseudogene 9836 [Source:MGI Symbol;Acc:MGI:3642194]	Multiple_Complex
TC0X00001976.mm.1	14.44	15.83	-2.63	0.3249	0.604	Gm7350	predicted gene 7350 [Source:MGI Symbol;Acc:MGI:3779733]	Pseudogene
TC1000001950.mm.1	8.61	10.01	-2.63	0.062	0.2568	Gm24168	predicted gene, 24168 [Source:MGI Symbol;Acc:MGI:5453945]	Small_RNA
TC0X00001980.mm.1	13.15	14.54	-2.63	0.3636	0.6355	Gm2030	predicted gene 2030	Coding
TC0800000885.mm.1	11.57	12.96	-2.63	0.0954	0.3239	Anapc10	anaphase promoting complex subunit 10	Coding
TC0800003113.mm.1	14.42	15.81	-2.63	0.0097	0.0888	n-R5s109	nuclear encoded rRNA 5S 109 [Source:MGI Symbol;Acc:MGI:4421957]	Ribosomal
TC0X00000509.mm.1	14.94	16.33	-2.62	0.374	0.644	Gm14624	predicted gene 14624 [Source:MGI Symbol;Acc:MGI:3709651]	Pseudogene
TC0500003661.mm.1	9.14	10.53	-2.62	0.0409	0.2027	Gm5566	predicted pseudogene 5566	Pseudogene
TC1300001492.mm.1	13.3	14.69	-2.62	0.0206	0.138	Gm22628	predicted gene, 22628 [Source:MGI Symbol;Acc:MGI:5452405]	Small_RNA
TC0200005344.mm.1	9.07	10.46	-2.62	0.1351	0.3887	Gm14431; Gm8898	predicted gene 14431 (Gm14431), transcript variant 2, mRNA.; predicted gene 8898 (Gm8898), transcript variant 2, mRNA.; predicted gene 14431 (Gm14431), transcript variant 1, mRNA.; predicted gene 8898 (Gm8898), transcript variant 1, mRNA.; predicted gene 8898; predicted gene 14431	Coding
TC0400001384.mm.1	11.81	13.2	-2.62	0.1648	0.432	Gm12891	predicted gene 12891 [Source:MGI Symbol;Acc:MGI:3649646]	Multiple_Complex
TC0500001014.mm.1	10.32	11.71	-2.62	0.1368	0.3913	Gm24897	predicted gene, 24897 [Source:MGI Symbol;Acc:MGI:5454674]	Small_RNA
TC0600001835.mm.1	12.9	14.29	-2.62	0.0205	0.1376	Gm22155	predicted gene, 22155 [Source:MGI Symbol;Acc:MGI:5451932]	Small_RNA
TC0200005378.mm.1	9.54	10.92	-2.62	0.1221	0.3683	Gm14326	predicted gene 14326	Coding
TC0X00002670.mm.1	12.9	14.28	-2.62	0.3127	0.5935	1700010D01Rik	RIKEN cDNA 1700010D01 gene	Coding
TC1500000751.mm.1	8.53	9.92	-2.61	0.0448	0.2138	n-R5s41	nuclear encoded rRNA 5S 41 [Source:MGI Symbol;Acc:MGI:4421886]	Ribosomal
TC0X00001462.mm.1	6.35	7.73	-2.61	0.0209	0.1389	Gm8289	predicted gene 8289 [Source:MGI Symbol;Acc:MGI:3645453]	Pseudogene
TC0400003355.mm.1	14.76	16.14	-2.61	0.0363	0.1898	Gm22092	predicted gene, 22092 [Source:MGI Symbol;Acc:MGI:5451869]	Small_RNA
TC1200001440.mm.1	14.76	16.14	-2.61	0.0363	0.1898	Gm22170	predicted gene, 22170 [Source:MGI Symbol;Acc:MGI:5451947]	Small_RNA
TC1200000950.mm.1	14.76	16.14	-2.61	0.0363	0.1898	Gm22246	predicted gene, 22246 [Source:MGI Symbol;Acc:MGI:5452023]	Small_RNA
TC0X00000451.mm.1	14.76	16.14	-2.61	0.0363	0.1898	Gm22288	predicted gene, 22288 [Source:MGI Symbol;Acc:MGI:5452065]	Small_RNA
TC0300000539.mm.1	14.76	16.14	-2.61	0.0363	0.1898	Gm22295	predicted gene, 22295 [Source:MGI Symbol;Acc:MGI:5452072]	Small_RNA
TC0100002849.mm.1	14.76	16.14	-2.61	0.0363	0.1898	Gm22360	predicted gene, 22360 [Source:MGI Symbol;Acc:MGI:5452137]	Small_RNA
TC0X00000814.mm.1	14.76	16.14	-2.61	0.0363	0.1898	Gm22580	predicted gene, 22580 [Source:MGI Symbol;Acc:MGI:5452357]	Small_RNA
TC0300001319.mm.1	14.76	16.14	-2.61	0.0363	0.1898	Gm22682	predicted gene, 22682 [Source:MGI Symbol;Acc:MGI:5452459]	Small_RNA
TC0300001975.mm.1	14.76	16.14	-2.61	0.0363	0.1898	Gm22798	predicted gene, 22798 [Source:MGI Symbol;Acc:MGI:5452575]	Small_RNA
TC0700004082.mm.1	14.76	16.14	-2.61	0.0363	0.1898	Gm22822	predicted gene, 22822 [Source:MGI Symbol;Acc:MGI:5452599]	Small_RNA
TC1400000414.mm.1	14.76	16.14	-2.61	0.0363	0.1898	Gm22823	predicted gene, 22823 [Source:MGI Symbol;Acc:MGI:5452600]	Small_RNA
TC1500001678.mm.1	14.76	16.14	-2.61	0.0363	0.1898	Gm23217	predicted gene, 23217 [Source:MGI Symbol;Acc:MGI:5452994]	Small_RNA
TC1200001734.mm.1	14.76	16.14	-2.61	0.0363	0.1898	Gm23296	predicted gene, 23296 [Source:MGI Symbol;Acc:MGI:5453073]	Small_RNA
TC1800001498.mm.1	14.76	16.14	-2.61	0.0363	0.1898	Gm23512	predicted gene, 23512 [Source:MGI Symbol;Acc:MGI:5453289]	Small_RNA
TC0100000691.mm.1	14.76	16.14	-2.61	0.0363	0.1898	Gm23934	predicted gene, 23934 [Source:MGI Symbol;Acc:MGI:5453711]	Small_RNA
TC1000000826.mm.1	14.76	16.14	-2.61	0.0363	0.1898	Gm24019	predicted gene, 24019 [Source:MGI Symbol;Acc:MGI:5453796]	Small_RNA
TC0100001549.mm.1	14.76	16.14	-2.61	0.0363	0.1898	Gm24182	predicted gene, 24182 [Source:MGI Symbol;Acc:MGI:5453959]	Small_RNA
TC0800002326.mm.1	14.76	16.14	-2.61	0.0363	0.1898	Gm24205	predicted gene, 24205 [Source:MGI Symbol;Acc:MGI:5453982]	Small_RNA
TC0300003030.mm.1	14.76	16.14	-2.61	0.0363	0.1898	Gm24260	predicted gene, 24260 [Source:MGI Symbol;Acc:MGI:5454037]	Small_RNA
TC0700002332.mm.1	14.76	16.14	-2.61	0.0363	0.1898	Gm24414	predicted gene, 24414 [Source:MGI Symbol;Acc:MGI:5454191]	Small_RNA
TC0300001522.mm.1	14.76	16.14	-2.61	0.0363	0.1898	Gm24458	predicted gene, 24458 [Source:MGI Symbol;Acc:MGI:5454235]	Small_RNA
TC1000000683.mm.1	14.76	16.14	-2.61	0.0363	0.1898	Gm24486	predicted gene, 24486 [Source:MGI Symbol;Acc:MGI:5454263]	Small_RNA
TC1400002397.mm.1	14.76	16.14	-2.61	0.0363	0.1898	Gm24540	predicted gene, 24540 [Source:MGI Symbol;Acc:MGI:5454317]	Small_RNA
TC0800001160.mm.1	14.76	16.14	-2.61	0.0363	0.1898	Gm24693	predicted gene, 24693 [Source:MGI Symbol;Acc:MGI:5454470]	Small_RNA
TC1700001261.mm.1	14.76	16.14	-2.61	0.0363	0.1898	Gm24722	predicted gene, 24722 [Source:MGI Symbol;Acc:MGI:5454499]	Small_RNA
TC1500000618.mm.1	14.76	16.14	-2.61	0.0363	0.1898	Gm24753	predicted gene, 24753 [Source:MGI Symbol;Acc:MGI:5454530]	Small_RNA
TC1100002111.mm.1	14.76	16.14	-2.61	0.0363	0.1898	Gm24803	predicted gene, 24803 [Source:MGI Symbol;Acc:MGI:5454580]	Small_RNA
TC1200000429.mm.1	14.76	16.14	-2.61	0.0363	0.1898	Gm24859	predicted gene, 24859 [Source:MGI Symbol;Acc:MGI:5454636]	Small_RNA
TC1300000119.mm.1	14.76	16.14	-2.61	0.0363	0.1898	Gm24873	predicted gene, 24873 [Source:MGI Symbol;Acc:MGI:5454650]	Small_RNA
TC0400003244.mm.1	14.76	16.14	-2.61	0.0363	0.1898	Gm24967	predicted gene, 24967 [Source:MGI Symbol;Acc:MGI:5454744]	Small_RNA
TC0400000147.mm.1	14.76	16.14	-2.61	0.0363	0.1898	Gm24978	predicted gene, 24978 [Source:MGI Symbol;Acc:MGI:5454755]	Small_RNA
TC0900000797.mm.1	14.76	16.14	-2.61	0.0363	0.1898	Gm25064	predicted gene, 25064 [Source:MGI Symbol;Acc:MGI:5454841]	Small_RNA
TC0300001510.mm.1	14.76	16.14	-2.61	0.0363	0.1898	Gm25127	predicted gene, 25127 [Source:MGI Symbol;Acc:MGI:5454904]	Small_RNA
TC1000000146.mm.1	14.76	16.14	-2.61	0.0363	0.1898	Gm25256	predicted gene, 25256 [Source:MGI Symbol;Acc:MGI:5455033]	Small_RNA
TC0700001522.mm.1	14.76	16.14	-2.61	0.0363	0.1898	Gm25405	predicted gene, 25405 [Source:MGI Symbol;Acc:MGI:5455182]	Small_RNA
TC1600001250.mm.1	14.76	16.14	-2.61	0.0363	0.1898	Gm25547	predicted gene, 25547 [Source:MGI Symbol;Acc:MGI:5455324]	Small_RNA
TC0200002116.mm.1	14.76	16.14	-2.61	0.0363	0.1898	Gm25583	predicted gene, 25583 [Source:MGI Symbol;Acc:MGI:5455360]	Small_RNA
TC1000002939.mm.1	14.76	16.14	-2.61	0.0363	0.1898	Gm25709	predicted gene, 25709 [Source:MGI Symbol;Acc:MGI:5455486]	Small_RNA
TC0600000097.mm.1	14.76	16.14	-2.61	0.0363	0.1898	Gm25737	predicted gene, 25737 [Source:MGI Symbol;Acc:MGI:5455514]	Small_RNA
TC0700003653.mm.1	14.76	16.14	-2.61	0.0363	0.1898	Gm25790	predicted gene, 25790 [Source:MGI Symbol;Acc:MGI:5455567]	Small_RNA
TC0100002347.mm.1	14.76	16.14	-2.61	0.0363	0.1898	Gm25829	predicted gene, 25829 [Source:MGI Symbol;Acc:MGI:5455606]	Small_RNA
TC0300001052.mm.1	14.76	16.14	-2.61	0.0363	0.1898	Gm25869	predicted gene, 25869 [Source:MGI Symbol;Acc:MGI:5455646]	Small_RNA
TC0600001859.mm.1	14.76	16.14	-2.61	0.0363	0.1898	Gm26058	predicted gene, 26058 [Source:MGI Symbol;Acc:MGI:5455835]	Small_RNA
TC1000000832.mm.1	14.76	16.14	-2.61	0.0363	0.1898	Gm26243	predicted gene, 26243 [Source:MGI Symbol;Acc:MGI:5456020]	Small_RNA
TC1600000399.mm.1	14.76	16.14	-2.61	0.0363	0.1898	Gm26295	predicted gene, 26295 [Source:MGI Symbol;Acc:MGI:5456072]	Small_RNA
TC0X00001641.mm.1	14.76	16.14	-2.61	0.0363	0.1898	Gm26317	predicted gene, 26317 [Source:MGI Symbol;Acc:MGI:5456094]	Small_RNA
TC0800001649.mm.1	14.76	16.14	-2.61	0.0363	0.1898	Gm26427	predicted gene, 26427 [Source:MGI Symbol;Acc:MGI:5456204]	Small_RNA
TC0200004534.mm.1	14.76	16.14	-2.61	0.0363	0.1898	Gm26496	predicted gene, 26496 [Source:MGI Symbol;Acc:MGI:5456273]	Small_RNA
TC1700001471.mm.1	14.76	16.14	-2.61	0.0363	0.1898	Rnu6	U6 small nuclear RNA	Small_RNA
TC1100000354.mm.1	8.07	9.46	-2.61	0.345	0.6216	Gm12115	predicted gene 12115	Multiple_Complex
TC1500002069.mm.1	13.82	15.2	-2.61	0.1631	0.4297	Rpl31-ps8	ribosomal protein L31, pseudogene 8	Pseudogene
TC1300000916.mm.1	7.5	8.88	-2.61	0.0992	0.3309	Gm23127	predicted gene, 23127 [Source:MGI Symbol;Acc:MGI:5452904]	Small_RNA
TC0100002912.mm.1	13.76	15.14	-2.61	0.0229	0.1465	Gm24267	predicted gene, 24267 [Source:MGI Symbol;Acc:MGI:5454044]	Small_RNA
TC1900000487.mm.1	12.91	14.29	-2.61	0.0472	0.2203	Gm23095	predicted gene, 23095 [Source:MGI Symbol;Acc:MGI:5452872]	Small_RNA
TC0100002669.mm.1	11.72	13.11	-2.6	0.9658	0.9866			NonCoding
TC1800000977.mm.1	8.06	9.44	-2.6	0.0112	0.0972	Esco1	establishment of cohesion 1 homolog 1 (S. cerevisiae)	Multiple_Complex
TC0200005335.mm.1	9.94	11.32	-2.6	0.0835	0.3013	Gm14308; Gm14430; Gm14432; Gm14434; 0610010B08Rik; Gm4724; Gm4631	predicted gene 14308; predicted gene 14430; predicted gene 14432; predicted gene 14434 (Gm14434), mRNA.; RIKEN cDNA 0610010B08 gene (0610010B08Rik), mRNA.; predicted gene 4724 (Gm4724), mRNA.; predicted gene 4631; predicted gene 4724; RIKEN cDNA 0610010B08 gene	Coding
TC0200005491.mm.1	9.58	10.96	-2.6	0.1436	0.4017	Gm14419	predicted gene 14419	Coding
TC0600002511.mm.1	14.67	16.05	-2.6	0.027	0.1617	Gm23924	predicted gene, 23924 [Source:MGI Symbol;Acc:MGI:5453701]	Small_RNA
TC0300001396.mm.1	13.23	14.61	-2.6	0.0339	0.1838	Gm25080	predicted gene, 25080 [Source:MGI Symbol;Acc:MGI:5454857]	Small_RNA
TC0800002858.mm.1	12.92	14.3	-2.6	0.0666	0.2669	Gm10073	predicted pseudogene 10073 [Source:MGI Symbol;Acc:MGI:3641908]	Pseudogene
TC0300000903.mm.1	6.22	7.59	-2.59	0.0068	0.0724	Ctss	cathepsin S; cathepsin S (Ctss), transcript variant 1, mRNA.	Coding
TC1600001125.mm.1	11.58	12.96	-2.59	0.393	0.6592	Gm6142	predicted pseudogene 6142 [Source:MGI Symbol;Acc:MGI:3644670]	Pseudogene
TC0100003242.mm.1	13.27	14.64	-2.59	0.0508	0.2295	Gm22756	predicted gene, 22756 [Source:MGI Symbol;Acc:MGI:5452533]	Small_RNA
TC1200000031.mm.1	13.27	14.64	-2.59	0.0508	0.2295	Gm22003	predicted gene, 22003 [Source:MGI Symbol;Acc:MGI:5451780]	Small_RNA
TC0X00000508.mm.1	5.65	7.02	-2.59	0.3289	0.608	Gm14623	predicted gene 14623 [Source:MGI Symbol;Acc:MGI:3709650]	Pseudogene
TC0600002181.mm.1	14.6	15.97	-2.59	0.029	0.1681	Gm22363	predicted gene, 22363 [Source:MGI Symbol;Acc:MGI:5452140]	Small_RNA
TC0300002576.mm.1	14.6	15.97	-2.59	0.029	0.1681	Gm22505	predicted gene, 22505 [Source:MGI Symbol;Acc:MGI:5452282]	Small_RNA
TC1300000969.mm.1	11.6	12.97	-2.58	0.3196	0.6	Cetn3	centrin 3	Coding
TC0X00002366.mm.1	9.27	10.64	-2.58	0.3149	0.5957	4933436I01Rik	RIKEN cDNA 4933436I01 gene	Coding
TC0500000985.mm.1	8.32	9.69	-2.58	0.4124	0.6744	Mrps18c	mitochondrial ribosomal protein S18C	Multiple_Complex
TC0X00000489.mm.1	8.45	9.81	-2.58	0.3724	0.6427	Gm16428	predicted gene 16428 [Source:MGI Symbol;Acc:MGI:3648457]	Pseudogene
TC0800002751.mm.1	7.53	8.9	-2.58	0.007	0.0744	Gm26493	predicted gene, 26493 [Source:MGI Symbol;Acc:MGI:5456270]	Small_RNA
TC1200000603.mm.1	12.08	13.44	-2.58	0.0322	0.1787	Psma3	proteasome (prosome, macropain) subunit, alpha type 3	Multiple_Complex
TC0900000811.mm.1	12.91	14.27	-2.58	0.0663	0.2661	Gm23344	predicted gene, 23344 [Source:MGI Symbol;Acc:MGI:5453121]	Small_RNA
TC1200001623.mm.1	8.01	9.38	-2.58	0.8171	0.9217			NonCoding
TC0X00000153.mm.1	14.2	15.56	-2.58	0.3272	0.6064	Gm16265	predicted gene 16265 [Source:MGI Symbol;Acc:MGI:3826571]	Pseudogene
TC1500000344.mm.1	12.47	13.83	-2.57	0.1029	0.3374	Emc2	ER membrane protein complex subunit 2	Coding
TC1400002197.mm.1	5.7	7.07	-2.57	0.0425	0.2076	Mir15a	microRNA 15a	Precursor_microRNA
TC0800000621.mm.1	8.17	9.53	-2.57	0.0114	0.0981	Hpgd	hydroxyprostaglandin dehydrogenase 15 (NAD)	Multiple_Complex
TC0X00001959.mm.1	14.83	16.2	-2.57	0.2893	0.5715	Gm4732	predicted gene 4732 [Source:MGI Symbol;Acc:MGI:3782912]	Pseudogene
TC1200002159.mm.1	13.13	14.5	-2.57	0.1127	0.3534	Rpl31-ps1	ribosomal protein L31, pseudogene 1 [Source:MGI Symbol;Acc:MGI:3644997]	Pseudogene
TC0X00002324.mm.1	9.35	10.71	-2.57	0.6888	0.8552			NonCoding
TC0X00000179.mm.1	12.93	14.29	-2.57	0.336	0.6142	Cypt8; Cypt7; Cypt1	cysteine-rich perinuclear theca 8; cysteine-rich perinuclear theca 7; cysteine-rich perinuclear theca 1; Synthetic construct Mus musculus clone IMAGE:100062171, MGC:190394 cysteine-rich perinuclear theca 7 (Cypt7) mRNA, encodes complete protein.	Coding
TC0600002780.mm.1	12.5	13.86	-2.57	0.0548	0.2396	Gm26501	predicted gene, 26501 [Source:MGI Symbol;Acc:MGI:5456278]	Small_RNA
TC1100001473.mm.1	7.6	8.96	-2.57	0.3081	0.5891	Polr2k-ps; LOC102238523	polymerase (RNA) II (DNA directed) polypeptide K, pseudogene [Source:MGI Symbol;Acc:MGI:3650073]; polymerase (RNA) II (DNA directed) polypeptide K pseudogene	Pseudogene
TC1700001184.mm.1	6.43	7.79	-2.56	0.2972	0.5787	Gm19399	PREDICTED: predicted gene, 19399 (Gm19399), mRNA.	Coding
TC0900000996.mm.1	5.45	6.8	-2.56	0.0528	0.2345	n-R5s86	nuclear encoded rRNA 5S 86 [Source:MGI Symbol;Acc:MGI:4421934]	Ribosomal
TC0300000150.mm.1	6.89	8.25	-2.56	0.0302	0.1721	Gm24704	predicted gene, 24704 [Source:MGI Symbol;Acc:MGI:5454481]	Small_RNA
TC0300000685.mm.1	10.26	11.62	-2.56	0.0502	0.2278	Gm25039	predicted gene, 25039 [Source:MGI Symbol;Acc:MGI:5454816]	Small_RNA
TC0500000834.mm.1	6.05	7.41	-2.56	0.7885	0.9082	Alb	albumin	Coding
TC0200005383.mm.1	7.83	9.18	-2.56	0.0908	0.3154	Zfp931	zinc finger protein 931	Multiple_Complex
TC1700000200.mm.1	9.15	10.51	-2.56	0.0248	0.1539	Gm6712	predicted gene 6712 [Source:MGI Symbol;Acc:MGI:3645888]	Multiple_Complex
TC1000002631.mm.1	12.07	13.43	-2.56	0.0352	0.1873	Gm23191	predicted gene, 23191 [Source:MGI Symbol;Acc:MGI:5452968]	Small_RNA
TC0600000639.mm.1	13.45	14.8	-2.56	0.01	0.0905	Gm25818	predicted gene, 25818 [Source:MGI Symbol;Acc:MGI:5455595]	Small_RNA
TC1300002658.mm.1	6.05	7.4	-2.56	0.0221	0.1433	Gm15285	predicted gene 15285 [Source:MGI Symbol;Acc:MGI:3705624]	Pseudogene
TC1300000966.mm.1	5.38	6.74	-2.56	0.2908	0.5729			NonCoding
TC0400003658.mm.1	9.55	10.9	-2.56	0.2421	0.525	Gm13215	predicted gene 13215	Multiple_Complex
TC1600000001.mm.1	4.64	5.99	-2.56	0.118	0.3616			NonCoding
TC1800001285.mm.1	12.12	13.47	-2.56	0.0072	0.0753	Gm10540	predicted gene 10540 [Source:MGI Symbol;Acc:MGI:3642696]	Pseudogene
TC0400001964.mm.1	13.86	15.21	-2.55	0.0264	0.16	n-R5s193	nuclear encoded rRNA 5S 193 [Source:MGI Symbol;Acc:MGI:4422058]	Ribosomal
TC0600000954.mm.1	9.95	11.31	-2.55	0.0114	0.0985	Npm3-ps1	nucleoplasmin 3, pseudogene 1	Multiple_Complex
TC0X00001797.mm.1	8.42	9.77	-2.55	0.0035	0.0485	Rbm3	RNA binding motif protein 3	Multiple_Complex
TC1800000916.mm.1	8.43	9.78	-2.55	0.093	0.3197	Tmx3	thioredoxin-related transmembrane protein 3	Multiple_Complex
TC0400002176.mm.1	7.64	8.99	-2.55	0.1138	0.3551	Gm11810	predicted gene 11810	Multiple_Complex
TC1600001284.mm.1	13.31	14.66	-2.55	0.0419	0.206	Gm22129	predicted gene, 22129 [Source:MGI Symbol;Acc:MGI:5451906]	Small_RNA
TC0600000818.mm.1	8.81	10.16	-2.55	0.1814	0.4538	Rpl34-ps1	ribosomal protein L34, pseudogene 1	Multiple_Complex
TC0400000169.mm.1	8.04	9.39	-2.55	0.121	0.3669	Ggh	gamma-glutamyl hydrolase	Coding
TC0100001693.mm.1	12.79	14.14	-2.55	0.0248	0.1537	Gm24405	predicted gene, 24405 [Source:MGI Symbol;Acc:MGI:5454182]	Small_RNA
TC0500000713.mm.1	9.39	10.74	-2.55	0.343	0.6201			NonCoding
TC0700000210.mm.1	10.1	11.45	-2.55	0.045	0.2142	Gm23714	predicted gene, 23714 [Source:MGI Symbol;Acc:MGI:5453491]	Small_RNA
TC1300001141.mm.1	8.43	9.78	-2.55	0.2191	0.5001	Gm16335	predicted gene 16335 [Source:MGI Symbol;Acc:MGI:3840152]	Multiple_Complex
TC1800001307.mm.1	7.48	8.83	-2.55	0.0032	0.0458	Cdo1	cysteine dioxygenase 1, cytosolic	Coding
TC1500000358.mm.1	6.45	7.8	-2.54	0.0182	0.1294	Gm23343	predicted gene, 23343 [Source:MGI Symbol;Acc:MGI:5453120]	Small_RNA
TC1000001779.mm.1	12.45	13.79	-2.54	0.043	0.2092	Gm22995	predicted gene, 22995 [Source:MGI Symbol;Acc:MGI:5452772]	Small_RNA
TC1600001051.mm.1	7.53	8.87	-2.54	0.7633	0.8948			NonCoding
TC0200002737.mm.1	7.76	9.11	-2.54	0.191	0.4657	Gm14288; Gm14435	predicted gene 14288 (Gm14288), mRNA.; predicted gene 14435	Multiple_Complex
TC0X00000741.mm.1	6.15	7.5	-2.54	0.0408	0.2026	Fundc2	FUN14 domain containing 2	Multiple_Complex
TC1900000454.mm.1	12.72	14.07	-2.54	0.0956	0.3243	Rpl31-ps20	ribosomal protein L31, pseudogene 20	Pseudogene
TC0200001586.mm.1	12.08	13.42	-2.54	0.3207	0.6009	Immp1l	IMP1 inner mitochondrial membrane peptidase-like (S. cerevisiae)	Coding
TC1100001666.mm.1	7.35	8.7	-2.54	0.024	0.151	Gm24950	predicted gene, 24950 [Source:MGI Symbol;Acc:MGI:5454727]	Multiple_Complex
TC0X00001404.mm.1	9.44	10.78	-2.54	0.3082	0.5891	Gm7123	predicted pseudogene 7123	Multiple_Complex
TC0200000551.mm.1	9.42	10.76	-2.54	0.0028	0.0424	Ass1; Gm5424	argininosuccinate synthetase 1; argininosuccinate synthase pseudogene	Multiple_Complex
TC0900001160.mm.1	14.96	16.31	-2.54	0.0158	0.1196	Gm22866	predicted gene, 22866 [Source:MGI Symbol;Acc:MGI:5452643]	Small_RNA
TC0700002771.mm.1	9.94	11.28	-2.54	0.0509	0.2298	Cox6b1	cytochrome c oxidase, subunit VIb polypeptide 1	Multiple_Complex
TC0500003675.mm.1	7.82	9.17	-2.54	0.8232	0.9243			NonCoding
TC1600001803.mm.1	8.45	9.79	-2.53	0.9993	0.9998			NonCoding
TC0100003686.mm.1	10.29	11.63	-2.53	0.2141	0.4941	Rpl35a-ps2	ribosomal protein L35A, pseudogene 2	Pseudogene
TC0Y00000553.mm.1	9.39	10.73	-2.53	0.0606	0.2531	Rbmy; Gm21677; Gm21708	RNA binding motif protein, Y chromosome (Rbmy), transcript variant 2, mRNA.; predicted gene, 21677 (Gm21677), mRNA.; predicted gene, 21708 (Gm21708), mRNA.; RNA binding motif protein, Y chromosome (Rbmy), transcript variant 1, mRNA.; RNA binding motif protein, Y chromosome	Coding
TC1300000992.mm.1	4.28	5.62	-2.53	0.571	0.785			NonCoding
TC0Y00000012.mm.1	9.11	10.45	-2.52	0.0515	0.2312	Rbmy; Gm3376; Gm21708	RNA binding motif protein, Y chromosome (Rbmy), transcript variant 2, mRNA.; predicted gene 3376; predicted gene, 21708 (Gm21708), mRNA.; RNA binding motif protein, Y chromosome (Rbmy), transcript variant 1, mRNA.; predicted gene, 21708; RNA binding motif protein, Y chromosome	Coding
TC1300001170.mm.1	9.6	10.94	-2.52	0.0002	0.0075	Trim23	tripartite motif-containing 23	Multiple_Complex
TC0100000156.mm.1	6.83	8.16	-2.52	0.018	0.1286	Mir30c-2	microRNA 30c-2	Multiple_Complex
TC1300000101.mm.1	9.55	10.88	-2.52	0.003	0.0439	Psma2	proteasome (prosome, macropain) subunit, alpha type 2	Multiple_Complex
TC0300002265.mm.1	11.28	12.61	-2.52	0.008	0.0796	Rnu73b	U73B small nuclear RNA	Small_RNA
TC0400000750.mm.1	9.03	10.36	-2.52	0.4187	0.679	Gm11221	predicted gene 11221 [Source:MGI Symbol;Acc:MGI:3651633]	Pseudogene
TC1300001507.mm.1	14.88	16.21	-2.52	0.0246	0.1531	Gm24018	predicted gene, 24018 [Source:MGI Symbol;Acc:MGI:5453795]	Small_RNA
TC1500001728.mm.1	6.59	7.92	-2.52	0.0162	0.1207	Ly6a	lymphocyte antigen 6 complex, locus A; lymphocyte antigen 6 complex, locus A (Ly6a), mRNA.	Multiple_Complex
TC0200003854.mm.1	6.83	8.16	-2.52	0.0161	0.1206	Gm13680	predicted gene 13680 [Source:MGI Symbol;Acc:MGI:3652285]	Pseudogene
TC0X00000248.mm.1	12.77	14.1	-2.52	0.3516	0.6262	Gm14533	predicted gene 14533 [Source:MGI Symbol;Acc:MGI:3801834]	Pseudogene
TC0Y00000011.mm.1	9.4	10.73	-2.52	0.0618	0.2562	Rbmy; Gm10256; Gm10352; Gm21677; Gm21693; Gm21704; Gm21708; Gm4064	RNA binding motif protein, Y chromosome (Rbmy), transcript variant 2, mRNA.; predicted gene 10256; predicted gene 10352; predicted gene, 21677 (Gm21677), mRNA.; predicted gene, 21693 (Gm21693), mRNA.; predicted gene, 21704; predicted gene, 21708 (Gm21708), mRNA.; predicted gene 4064; RNA binding motif protein, Y chromosome (Rbmy), transcript variant 1, mRNA.; RNA binding motif protein, Y chromoso…	Coding
TC0400002224.mm.1	13.74	15.07	-2.52	0.2535	0.5365	Gm11826	predicted gene 11826 [Source:MGI Symbol;Acc:MGI:3651142]	Multiple_Complex
TC0200002715.mm.1	9.28	10.61	-2.52	0.2465	0.5299	Gm14387	predicted gene 14387	Pseudogene
TC0X00000745.mm.1	6.92	8.25	-2.52	0.0289	0.168	Vbp1	von Hippel-Lindau binding protein 1; Synthetic construct Mus musculus clone IMAGE:100015730, MGC:183413 von Hippel-Lindau binding protein 1 (Vbp1) mRNA, encodes complete protein.	Multiple_Complex
TC0200005363.mm.1	7.67	9	-2.51	0.2382	0.5208	Gm14409	predicted gene 14409 [Source:MGI Symbol;Acc:MGI:3649811]	Coding
TC0700000787.mm.1	9.2	10.53	-2.51	0.0562	0.2429	Egfbp2; Klk1b26	epidermal growth factor binding protein type B; kallikrein 1-related petidase b26	Coding
TC0200004448.mm.1	13.99	15.32	-2.51	0.0323	0.1791	Gm23814	predicted gene, 23814 [Source:MGI Symbol;Acc:MGI:5453591]	Small_RNA
TC0800000557.mm.1	4.88	6.21	-2.51	0.103	0.3377	n-R5s96	nuclear encoded rRNA 5S 96 [Source:MGI Symbol;Acc:MGI:4421944]	Ribosomal
TC0M00000011.mm.1	17.49	18.82	-2.51	0.0022	0.0363	ND3	NADH dehydrogenase subunit 3	Coding
TC0200005492.mm.1	9.65	10.98	-2.51	0.2624	0.5458	Gm14416	predicted gene 14416	Pseudogene
TC1200002234.mm.1	11.25	12.57	-2.51	0.0725	0.2788	Gm25801	predicted gene, 25801 [Source:MGI Symbol;Acc:MGI:5455578]	Small_RNA
TC0300002882.mm.1	14.2	15.52	-2.51	0.0942	0.3219	Gm24456	predicted gene, 24456 [Source:MGI Symbol;Acc:MGI:5454233]	Small_RNA
TC1900001094.mm.1	12.3	13.63	-2.51	0.0647	0.2626			NonCoding
TC0400001725.mm.1	13.83	15.15	-2.51	0.2493	0.5319	Rpl38-ps1	ribosomal protein L38, pseudogene 1	Multiple_Complex
TC1300002492.mm.1	6.31	7.64	-2.51	0.8069	0.917			NonCoding
TC1100002541.mm.1	12.9	14.23	-2.51	0.0487	0.224	Gm23520	predicted gene, 23520 [Source:MGI Symbol;Acc:MGI:5453297]	Small_RNA
TC0200004962.mm.1	7.08	8.41	-2.51	0.0261	0.1584	Gm14238	predicted gene 14238 [Source:MGI Symbol;Acc:MGI:3651676]	Multiple_Complex
TC0200003356.mm.1	10.11	11.43	-2.51	0.3142	0.5949	Gm13450	predicted gene 13450 [Source:MGI Symbol;Acc:MGI:3650133]	Pseudogene
TC0700000783.mm.1	10.08	11.41	-2.5	0.2903	0.5724	Klk1b8	kallikrein 1-related peptidase b8	Coding
TC0X00002323.mm.1	6.49	7.82	-2.5	0.3772	0.646	1700019B21Rik	RIKEN cDNA 1700019B21 gene	NonCoding
TC1700000342.mm.1	6.19	7.52	-2.5	0.0839	0.3021	Rab26os	RAB26, member RAS oncogene family, opposite strand	Multiple_Complex
TC0600001237.mm.1	12.97	14.29	-2.5	0.4923	0.7313	Gm6134	predicted pseudogene 6134 [Source:MGI Symbol;Acc:MGI:3648731]	Pseudogene
TC1600001730.mm.1	7.55	8.87	-2.5	0.3853	0.6528	4930404A05Rik	RIKEN cDNA 4930404A05 gene; RIKEN cDNA 4930404A05 gene (4930404A05Rik), non-coding RNA.	NonCoding
TC0300001469.mm.1	12.1	13.42	-2.5	0.0716	0.277	2018-09-15	selenoprotein	Multiple_Complex
TC0800000331.mm.1	9.96	11.28	-2.5	0.0354	0.188	Star	steroidogenic acute regulatory protein	Coding
TC1200001715.mm.1	10.13	11.45	-2.49	0.0108	0.0952	Strn3	striatin, calmodulin binding protein 3	Coding
TC0X00002227.mm.1	14.66	15.98	-2.49	0.2257	0.5072	Gm14586	predicted gene 14586 [Source:MGI Symbol;Acc:MGI:3705507]	Multiple_Complex
TC0X00001216.mm.1	6.5	7.82	-2.49	0.029	0.1681	Gm5945	PREDICTED: predicted gene 5945 (Gm5945), mRNA.	Multiple_Complex
TC0Y00000561.mm.1	9.48	10.79	-2.49	0.0662	0.2659	Gm21677; Gm21693; Gm21704	predicted gene, 21677 (Gm21677), mRNA.; predicted gene, 21693; predicted gene, 21704 (Gm21704), mRNA.; predicted gene, 21704	Coding
TC0X00001968.mm.1	14.89	16.21	-2.49	0.372	0.6424	Gm5935	predicted gene 5935	Coding
TC0500001127.mm.1	7.18	8.5	-2.49	0.0287	0.1674	Gm15446	predicted gene 15446	Multiple_Complex
TC0100000155.mm.1	8.14	9.45	-2.48	4.04e-05	0.0026			NonCoding
TC0200002721.mm.1	9.45	10.77	-2.48	0.0714	0.2765	Gm14436; Gm8923	predicted gene 14436; predicted gene 8923	Coding
TC0500002202.mm.1	6.28	7.59	-2.48	0.4726	0.7172	LOC100861758	PREDICTED: uncharacterized LOC100861758 (LOC100861758), miscRNA.	NonCoding
TC0300002128.mm.1	11.95	13.26	-2.48	0.0334	0.1821	Gm22009	predicted gene, 22009 [Source:MGI Symbol;Acc:MGI:5451786]	Small_RNA
TC0600001652.mm.1	8.95	10.26	-2.48	0.0413	0.2042	n-R5s168	nuclear encoded rRNA 5S 168 [Source:MGI Symbol;Acc:MGI:4422032]	Ribosomal
TC0600000373.mm.1	14.82	16.13	-2.48	0.1919	0.467	Rpl30-ps1	ribosomal protein L30, pseudogene 1	Pseudogene
TC0Y00000242.mm.1	9.21	10.52	-2.48	0.067	0.2677	Rbmy; Gm4064	RNA binding motif protein, Y chromosome; PREDICTED: predicted gene 4064, transcript variant 2 (Gm4064), mRNA.; predicted gene 4064	Coding
TC0X00003015.mm.1	6.13	7.44	-2.48	0.4438	0.6972	Tmsb15a	thymosin beta 15a	Coding
TC0800000642.mm.1	6.67	7.98	-2.48	0.6289	0.8206			NonCoding
TC0X00000471.mm.1	8.07	9.38	-2.48	0.0085	0.0825	Hprt	hypoxanthine guanine phosphoribosyl transferase	Coding
TC0Y00000562.mm.1	9.24	10.55	-2.47	0.0677	0.2691	Rbmy; Gm21677; Gm21708	RNA binding motif protein, Y chromosome; predicted gene, 21677; predicted gene, 21708	Coding
TC0200005331.mm.1	10.38	11.69	-2.47	0.0443	0.2125	Gm14399	predicted gene 14399	Multiple_Complex
TC0800001205.mm.1	14.86	16.16	-2.47	0.0338	0.1835	Gm22063	predicted gene, 22063 [Source:MGI Symbol;Acc:MGI:5451840]	Small_RNA
TC1200001750.mm.1	14.09	15.4	-2.47	0.1039	0.3392	Rpl31-ps17	ribosomal protein L31, pseudogene 17	Pseudogene
TC1800001003.mm.1	8.77	10.07	-2.47	0.1822	0.4547	Gm22251	predicted gene, 22251 [Source:MGI Symbol;Acc:MGI:5452028]	Small_RNA
TC0600000091.mm.1	8.37	9.67	-2.47	0.0197	0.1349	Tmem106b	transmembrane protein 106B	Multiple_Complex
TC0300002263.mm.1	11.88	13.18	-2.47	0.0483	0.2232	Rps3a1	ribosomal protein S3A1	Coding
TC0200005360.mm.1	8.67	9.98	-2.47	0.2103	0.4896	Gm14411	predicted gene 14411	Multiple_Complex
TC0700004588.mm.1	8.7	10.01	-2.47	0.05	0.2273	Gm23297	predicted gene, 23297 [Source:MGI Symbol;Acc:MGI:5453074]	Small_RNA
TC0200003599.mm.1	7.5	8.8	-2.47	0.0926	0.3189	Cd302	CD302 antigen	Coding
TC0500002735.mm.1	14.74	16.05	-2.47	0.0407	0.2022	Gm23092	predicted gene, 23092 [Source:MGI Symbol;Acc:MGI:5452869]	Small_RNA
TC0500003706.mm.1	14.74	16.05	-2.47	0.0407	0.2022	Gm24242	predicted gene, 24242 [Source:MGI Symbol;Acc:MGI:5454019]	Small_RNA
TC0Y00000554.mm.1	9.2	10.51	-2.47	0.0682	0.27	Gm10256; Gm10352	predicted gene 10256; predicted gene 10352	Coding
TC0X00002345.mm.1	5.84	7.14	-2.47	0.0001	0.0057	Mir883b	microRNA 883b	Precursor_microRNA
TC1000000716.mm.1	10.46	11.76	-2.47	0.2232	0.5047	Snrpd3	small nuclear ribonucleoprotein D3	Coding
TC0600001639.mm.1	7.71	9.01	-2.47	0.0165	0.1222	Mgst1	microsomal glutathione S-transferase 1	Multiple_Complex
TC0Y00000146.mm.1	14.99	16.3	-2.47	0.3571	0.6299	LOC100861914	PREDICTED: X-linked lymphocyte-regulated protein PM1-like (LOC100861914), mRNA.	Coding
TC0Y00000171.mm.1	14.99	16.3	-2.47	0.3571	0.6299	LOC100862270	PREDICTED: X-linked lymphocyte-regulated protein PM1-like (LOC100862270), mRNA.	Coding
TC0X00001972.mm.1	15.14	16.44	-2.47	0.3139	0.5947	Gm1989	predicted gene 1989 [Source:MGI Symbol;Acc:MGI:3780158]	Pseudogene
TC0100002331.mm.1	13.8	15.1	-2.46	0.4677	0.7132	1700019A02Rik	RIKEN cDNA 1700019A02 gene	Coding
TC0X00001059.mm.1	12.69	13.99	-2.46	0.2673	0.5509	Cypt2	cysteine-rich perinuclear theca 2	Coding
TC0500000339.mm.1	10.48	11.78	-2.46	0.0061	0.0683	Ppp1cb	protein phosphatase 1, catalytic subunit, beta isoform; protein phosphatase 1, catalytic subunit, beta isoform (Ppp1cb), mRNA.	Multiple_Complex
TC0X00002888.mm.1	14.61	15.91	-2.46	0.1598	0.4251	Gm7429	predicted pseudogene 7429	Pseudogene
TC1900000381.mm.1	9.96	11.26	-2.46	0.1307	0.3823	Gm6563	predicted pseudogene 6563 [Source:MGI Symbol;Acc:MGI:3646907]	Pseudogene
TC0900002248.mm.1	9.01	10.31	-2.46	0.9077	0.9614			NonCoding
TC0500002915.mm.1	10.17	11.47	-2.46	0.0032	0.0461	Hfm1	HFM1, ATP-dependent DNA helicase homolog (S. cerevisiae)	Multiple_Complex
TC1200001300.mm.1	14.76	16.05	-2.46	0.0273	0.1628	Gm23732	predicted gene, 23732 [Source:MGI Symbol;Acc:MGI:5453509]	Small_RNA
TC0400000223.mm.1	14.76	16.05	-2.46	0.0273	0.1628	Gm25173	predicted gene, 25173 [Source:MGI Symbol;Acc:MGI:5454950]	Small_RNA
TC0500002689.mm.1	14.76	16.05	-2.46	0.0273	0.1628	Gm25211	predicted gene, 25211 [Source:MGI Symbol;Acc:MGI:5454988]	Small_RNA
TC1100001603.mm.1	14.76	16.05	-2.46	0.0273	0.1628	Gm26324	predicted gene, 26324 [Source:MGI Symbol;Acc:MGI:5456101]	Small_RNA
TC1400002873.mm.1	9.23	10.53	-2.46	0.5094	0.7433	Gm1974	PREDICTED: predicted gene 1974 (Gm1974), miscRNA.	NonCoding
TC0700000876.mm.1	14.81	16.11	-2.45	0.0301	0.1718	Gm22969	predicted gene, 22969 [Source:MGI Symbol;Acc:MGI:5452746]	Small_RNA
TC1700000277.mm.1	6.97	8.26	-2.45	0.027	0.1616	Gm10509	zinc finger protein 51 pseudogene	Multiple_Complex
TC1200001785.mm.1	8.54	9.83	-2.45	0.0131	0.1072	Mbip	MAP3K12 binding inhibitory protein 1	Coding
TC0X00000109.mm.1	5.15	6.44	-2.45	0.0012	0.024			NonCoding
TC0X00001825.mm.1	10.71	12.01	-2.45	0.029	0.1681			NonCoding
TC0X00001983.mm.1	14.75	16.04	-2.45	0.3436	0.6204	Slx	Sycp3 like X-linked	Coding
TC0600001875.mm.1	7.07	8.36	-2.45	0.0006	0.0149	B630005N14Rik	RIKEN cDNA B630005N14 gene	Multiple_Complex
TC1300001137.mm.1	14.03	15.32	-2.44	0.1386	0.3937	Rpl31-ps13	ribosomal protein L31, pseudogene 13	Pseudogene
TC0X00001971.mm.1	15.35	16.64	-2.44	0.3667	0.6381	Gm5169	predicted gene 5169	Coding
TC0X00000574.mm.1	8.12	9.41	-2.44	0.1224	0.3688	4933402E13Rik	RIKEN cDNA 4933402E13 gene	Coding
TC0100000707.mm.1	8.59	9.88	-2.44	0.0342	0.1845	n-R5s213	nuclear encoded rRNA 5S 213 [Source:MGI Symbol;Acc:MGI:4422078]	Ribosomal
TC0700000920.mm.1	8.58	9.86	-2.44	0.0394	0.1987	Gm22444	predicted gene, 22444 [Source:MGI Symbol;Acc:MGI:5452221]	Small_RNA
TC0200001238.mm.1	8.48	9.77	-2.44	0.0188	0.1317	Gm23716	predicted gene, 23716 [Source:MGI Symbol;Acc:MGI:5453493]	Small_RNA
TC0500001107.mm.1	14.73	16.02	-2.44	0.2423	0.5251	Gm10086	predicted pseudogene 10086 [Source:MGI Symbol;Acc:MGI:3642342]	Multiple_Complex
TC0800002414.mm.1	6.59	7.87	-2.44	0.0278	0.1646	Snora68	small nucleolar RNA, H/ACA box 68	Small_RNA
TC0Y00000244.mm.1	9.3	10.58	-2.44	0.0709	0.2755	Gm21693	predicted gene, 21693 (Gm21693), mRNA.; predicted gene, 21693	Coding
TC1700002719.mm.1	8.27	9.56	-2.44	0.0866	0.3075	Lhcgr	luteinizing hormone/choriogonadotropin receptor	Coding
TC1500000779.mm.1	11.68	12.96	-2.43	0.1302	0.3816	Rpl31-ps22	ribosomal protein L31, pseudogene 22	Multiple_Complex
TC1500000658.mm.1	9.66	10.95	-2.43	0.023	0.1468	Lgals1	lectin, galactose binding, soluble 1	Coding
TC0600003465.mm.1	6.81	8.1	-2.43	0.0294	0.1694	Gm23456	predicted gene, 23456 [Source:MGI Symbol;Acc:MGI:5453233]	Small_RNA
TC1300001321.mm.1	14.37	15.66	-2.43	0.1966	0.473	Rpl34-ps2; Gm6404	ribosomal protein L34, pseudogene 2 [Source:MGI Symbol;Acc:MGI:3648994]; predicted gene 6404	Multiple_Complex
TC1300001508.mm.1	8.54	9.82	-2.43	0.0606	0.2532	Rala	v-ral simian leukemia viral oncogene homolog A (ras related)	Coding
TC1400002014.mm.1	10.83	12.11	-2.43	0.7461	0.886	Gm5800	predicted gene 5800	Coding
TC0300002674.mm.1	9.27	10.55	-2.43	0.23	0.512	Rap1a	RAS-related protein-1a	Coding
TC1100000197.mm.1	14.15	15.43	-2.43	0.1949	0.4711	Gm12034	predicted gene 12034 [Source:MGI Symbol;Acc:MGI:3651409]	Pseudogene
TC1100004295.mm.1	8.37	9.65	-2.43	0.0271	0.1623	Nme2	NME/NM23 nucleoside diphosphate kinase 2	Coding
TC0700001156.mm.1	10.73	12.01	-2.43	0.2468	0.5301	Gm17257	predicted gene, 17257 [Source:MGI Symbol;Acc:MGI:4936891]	Pseudogene
TC0300001126.mm.1	8.22	9.5	-2.43	0.158	0.4226	Gm12497	predicted pseudogene 12497 [Source:MGI Symbol;Acc:MGI:3650111]	Multiple_Complex
TC0Y00000243.mm.1	9.31	10.58	-2.42	0.0714	0.2765	Rbmy; Gm21677; Gm21693; Gm21704; Gm21708	RNA binding motif protein, Y chromosome (Rbmy), transcript variant 2, mRNA.; predicted gene, 21677 (Gm21677), mRNA.; predicted gene, 21693 (Gm21693), mRNA.; predicted gene, 21704 (Gm21704), mRNA.; predicted gene, 21708 (Gm21708), mRNA.; RNA binding motif protein, Y chromosome (Rbmy), transcript variant 1, mRNA.; predicted gene, 21677; RNA binding motif protein, Y chromosome; predicted gene, 21708	Coding
TC1500000380.mm.1	7.98	9.25	-2.42	0.3132	0.5941	Med30	mediator complex subunit 30	Coding
TC0Y00000200.mm.1	15.74	17.01	-2.42	0.4629	0.7101	LOC380994; LOC100861734; Gm20736	similar to Sycp3 like Y-linked, mRNA (cDNA clone MGC:118285 IMAGE:6705131), complete cds.; PREDICTED: X-linked lymphocyte-regulated protein PM1-like (LOC100861734), mRNA.; predicted gene, 20736	Coding
TC0Y00000439.mm.1	15.74	17.01	-2.42	0.4629	0.7101	LOC380994; LOC100039842; Gm20736	similar to Sycp3 like Y-linked, mRNA (cDNA clone MGC:118285 IMAGE:6705131), complete cds.; PREDICTED: X-linked lymphocyte-regulated protein PM1-like, transcript variant 2 (LOC100039842), mRNA.; predicted gene, 20736	Coding
TC1900001612.mm.1	16.19	17.47	-2.42	0.1637	0.4306	Cyp17a1	cytochrome P450, family 17, subfamily a, polypeptide 1	Multiple_Complex
TC0X00003217.mm.1	12.42	13.69	-2.42	0.2566	0.5398	Gm5645	predicted pseudogene 5645	Pseudogene
TC1300001627.mm.1	10.16	11.44	-2.42	0.0377	0.1938	Gm19658	PREDICTED: predicted gene, 19658 (Gm19658), miscRNA.	NonCoding
TC0200005365.mm.1	9.14	10.42	-2.42	0.2778	0.5606	Gm14418	predicted gene 14418 [Source:MGI Symbol;Acc:MGI:3702408]	Multiple_Complex
TC0200002729.mm.1	9.28	10.56	-2.42	0.1318	0.3841	Gm14391; Gm6710	predicted gene 14391 (Gm14391), transcript variant 1, mRNA.; predicted gene 6710 (Gm6710), mRNA.; predicted gene 14391 (Gm14391), transcript variant 2, mRNA.; predicted gene 6710; predicted gene 14391	Multiple_Complex
TC0400001702.mm.1	14.27	15.54	-2.42	0.0448	0.2137	Gm25772	predicted gene, 25772 [Source:MGI Symbol;Acc:MGI:5455549]	Small_RNA
TC0800000910.mm.1	7.26	8.54	-2.42	0.009	0.0851	Gm25138	predicted gene, 25138 [Source:MGI Symbol;Acc:MGI:5454915]	Small_RNA
TC1200000749.mm.1	11.95	13.22	-2.42	0.1269	0.3765	Gm23298	predicted gene, 23298 [Source:MGI Symbol;Acc:MGI:5453075]	Small_RNA
TC0X00001974.mm.1	15.53	16.8	-2.42	0.2961	0.5777	Gm2003	predicted pseudogene 2003	Pseudogene
TC1800001096.mm.1	8.81	10.08	-2.42	0.2502	0.533			NonCoding
TC1800001047.mm.1	13.53	14.8	-2.42	0.1904	0.4651	Gm10269	predicted gene 10269 [Source:MGI Symbol;Acc:MGI:3642381]	Coding
TC0400002952.mm.1	15.1	16.37	-2.42	0.1867	0.4605	Gm10154	predicted gene 10154 [Source:MGI Symbol;Acc:MGI:3642271]	Multiple_Complex
TC1100000599.mm.1	8.69	9.96	-2.41	0.0993	0.331	Gm11189	predicted gene 11189 [Source:MGI Symbol;Acc:MGI:3650984]	Pseudogene
TC1000000484.mm.1	9.25	10.52	-2.41	0.036	0.1898	Asf1a	anti-silencing function 1A histone chaperone; ASF1 anti-silencing function 1 homolog A (S. cerevisiae)	Coding
TC1700000460.mm.1	13.82	15.09	-2.41	0.2245	0.5061	Gm9703	predicted gene 9703 [Source:MGI Symbol;Acc:MGI:3780110]	Multiple_Complex
TC0X00001973.mm.1	14.65	15.92	-2.41	0.3395	0.617	Gm1993	predicted gene 1993	Coding
TC0600001765.mm.1	4.9	6.17	-2.41	0.0223	0.1444	Gm15781	predicted gene 15781 [Source:MGI Symbol;Acc:MGI:3783223]	Multiple_Complex
TC1700002169.mm.1	12.87	14.14	-2.41	0.0712	0.2764	Gm22474	predicted gene, 22474 [Source:MGI Symbol;Acc:MGI:5452251]	Small_RNA
TC0X00000655.mm.1	14.77	16.04	-2.41	0.1911	0.4659	Rpl30-ps10	ribosomal protein L30, pseudogene 10	Pseudogene
TC0100002008.mm.1	12.76	14.03	-2.41	0.3936	0.6597	Tceb1	transcription elongation factor B (SIII), polypeptide 1	Coding
TC0700001311.mm.1	8.3	9.56	-2.41	0.0859	0.3062	Ccdc90b	coiled-coil domain containing 90B	Multiple_Complex
TC1100001306.mm.1	8.58	9.85	-2.41	0.3204	0.6006	Atp5l-ps2	ATP synthase, H+ transporting, mitochondrial F0 complex, subunit G, pseudogene 2	Multiple_Complex
TC0X00000257.mm.1	15.47	16.74	-2.41	0.3156	0.5964	Gm7391	predicted pseudogene 7391	Pseudogene
TC1700001275.mm.1	14.26	15.52	-2.41	0.1158	0.3585	Rpl31-ps16	ribosomal protein L31, pseudogene 16	Multiple_Complex
TC1100000238.mm.1	10.22	11.49	-2.41	0.0061	0.0682	Xpo1	exportin 1, CRM1 homolog (yeast)	Multiple_Complex
TC0900003322.mm.1	4.33	5.6	-2.4	0.0802	0.2945	Gm21836	predicted gene, 21836 [Source:MGI Symbol;Acc:MGI:5434000]	Coding
TC0X00001251.mm.1	6.99	8.26	-2.4	0.066	0.2651	Gm24522	predicted gene, 24522 [Source:MGI Symbol;Acc:MGI:5454299]	Small_RNA
TC1700000986.mm.1	6.81	8.07	-2.4	0.0166	0.1226	Gm17377	predicted gene, 17377 [Source:MGI Symbol;Acc:MGI:4937011]	Multiple_Complex
TC0700004141.mm.1	7.81	9.08	-2.4	0.0183	0.1298	Cyp2r1	cytochrome P450, family 2, subfamily r, polypeptide 1; cytochrome P450, family 2, subfamily r, polypeptide 1 (Cyp2r1), mRNA.	Multiple_Complex
TC0X00003142.mm.1	7.15	8.42	-2.4	0.7393	0.8824			NonCoding
TC1300000568.mm.1	6.66	7.93	-2.4	0.1122	0.3526	Omd	osteomodulin	Coding
TC1100000098.mm.1	12.26	13.52	-2.4	0.0402	0.2011	Gm11971	predicted gene 11971 [Source:MGI Symbol;Acc:MGI:3650054]	Pseudogene
TC0700001844.mm.1	12.78	14.05	-2.4	0.0203	0.137	Smt3h2-ps2	SMT3 suppressor of mif two 3 homolog 2, pseudogene 2 (S. cerevisiae)	Pseudogene
TC1500000352.mm.1	11.93	13.19	-2.4	0.0477	0.2217	Gm22392	predicted gene, 22392 [Source:MGI Symbol;Acc:MGI:5452169]	Small_RNA
TC0900002259.mm.1	9.16	10.43	-2.4	0.0721	0.278	Gm25633	predicted gene, 25633 [Source:MGI Symbol;Acc:MGI:5455410]	Small_RNA
TC1800001453.mm.1	9.6	10.87	-2.4	0.1547	0.4181	Txnl1	thioredoxin-like 1	Coding
TC1000001398.mm.1	6.38	7.64	-2.4	0.0876	0.3092			NonCoding
TC1000001408.mm.1	6.38	7.64	-2.4	0.0876	0.3092			NonCoding
TC1000001416.mm.1	6.38	7.64	-2.4	0.0876	0.3092			NonCoding
TC1000001423.mm.1	6.38	7.64	-2.4	0.0876	0.3092			NonCoding
TC1000001430.mm.1	6.38	7.64	-2.4	0.0876	0.3092			NonCoding
TC1000001437.mm.1	6.38	7.64	-2.4	0.0876	0.3092			NonCoding
TC1000001445.mm.1	6.38	7.64	-2.4	0.0876	0.3092			NonCoding
TC1000002960.mm.1	6.38	7.64	-2.4	0.0876	0.3092			NonCoding
TC1700000855.mm.1	6.38	7.64	-2.4	0.0876	0.3092			NonCoding
TC0300001587.mm.1	4.69	5.96	-2.4	0.0058	0.0663	Depdc1a	DEP domain containing 1a	Coding
TC0M00000003.mm.1	14.7	15.96	-2.4	0.0165	0.1221	mt-Tv	mitochondrially encoded tRNA valine [Source:MGI Symbol;Acc:MGI:102472]	tRNA
TC0300002449.mm.1	14.73	15.99	-2.4	0.1005	0.3331	Rpl31-ps11	ribosomal protein L31, pseudogene 11	Multiple_Complex
TC0X00002365.mm.1	6.17	7.43	-2.4	0.0013	0.0254	Gm1140; Gm14692	predicted gene 1140 (Gm1140), mRNA.; predicted gene 14692 (Gm14692), mRNA.; predicted gene 1140	Coding
TC0X00000605.mm.1	6.17	7.43	-2.4	0.0013	0.0254	Gm1140; Gm14692	predicted gene 1140; predicted gene 14692	Coding
TC1400001124.mm.1	7.73	8.99	-2.4	0.0217	0.1422	Gm23278	predicted gene, 23278 [Source:MGI Symbol;Acc:MGI:5453055]	Small_RNA
TC0200002751.mm.1	9.55	10.81	-2.4	0.3133	0.5941	Gm14322	predicted gene 14322	Multiple_Complex
TC0400001706.mm.1	14.21	15.47	-2.4	0.1051	0.341	Rpl31-ps10	ribosomal protein L31, pseudogene 10	Pseudogene
TC0200005353.mm.1	7.85	9.11	-2.4	0.0874	0.3091	Gm14405	predicted gene 14405 (Gm14405), non-coding RNA.; predicted gene 14405	Multiple_Complex
TC0X00001987.mm.1	15.32	16.58	-2.4	0.363	0.635	Gm6121	predicted gene 6121	Coding
TC0900001988.mm.1	11.25	12.51	-2.4	0.1224	0.3688	Gm22060	predicted gene, 22060 [Source:MGI Symbol;Acc:MGI:5451837]	Small_RNA
TC1400002598.mm.1	9.47	10.73	-2.39	0.0102	0.0919	Mzt1	mitotic spindle organizing protein 1	Coding
TC1400001077.mm.1	6.36	7.62	-2.39	0.1929	0.4683	Ccdc122	coiled-coil domain containing 122	Multiple_Complex
TC0100000152.mm.1	7.1	8.36	-2.39	0.0061	0.0681			NonCoding
TC1300000956.mm.1	14.79	16.04	-2.39	0.0286	0.1669	Gm24863	predicted gene, 24863 [Source:MGI Symbol;Acc:MGI:5454640]	Small_RNA
TC1500000734.mm.1	11.6	12.86	-2.39	0.1285	0.3788	Gm5805	predicted gene 5805 [Source:MGI Symbol;Acc:MGI:3644633]	Pseudogene
TC1900001587.mm.1	11.11	12.37	-2.39	0.0281	0.1654	Npm3	nucleoplasmin 3	Multiple_Complex
TC0X00002534.mm.1	6.87	8.13	-2.39	0.2746	0.5576			NonCoding
TC0200003044.mm.1	8.88	10.14	-2.39	0.1166	0.3597	Gm13352	predicted gene 13352	Multiple_Complex
TC0X00001985.mm.1	15.73	16.98	-2.39	0.328	0.607	Gm14525	predicted gene 14525	Coding
TC1000000275.mm.1	14.84	16.1	-2.39	0.0374	0.1929	Gm22623	predicted gene, 22623 [Source:MGI Symbol;Acc:MGI:5452400]	Small_RNA
TC1300001669.mm.1	7.81	9.06	-2.39	0.0169	0.1237	Acot13	acyl-CoA thioesterase 13	Coding
TC0100001927.mm.1	7.62	8.88	-2.39	0.4136	0.6753	Gm26983	predicted gene, 26983 [Source:MGI Symbol;Acc:MGI:5504098]	Multiple_Complex
TC0200002746.mm.1	8.55	9.8	-2.39	0.1792	0.4512	Gm14401	predicted gene 14401 [Source:MGI Symbol;Acc:MGI:3650075]	Multiple_Complex
TC0500002944.mm.1	6.11	7.37	-2.39	0.2024	0.4799	Atp5k	ATP synthase, H+ transporting, mitochondrial F1F0 complex, subunit E; ATP synthase, H+ transporting, mitochondrial F1F0 complex, subunit e	Multiple_Complex
TC0700002788.mm.1	10.86	12.12	-2.39	0.0058	0.0658	Fxyd1	FXYD domain-containing ion transport regulator 1	Multiple_Complex
TC0200002998.mm.1	14.02	15.27	-2.39	0.2998	0.5807	Gm13268	predicted gene 13268	Pseudogene
TC0700000791.mm.1	6.66	7.91	-2.39	0.0429	0.209	Klk1b16	kallikrein 1-related peptidase b16	Coding
TC0500001365.mm.1	5.51	6.76	-2.39	0.0096	0.0882	Gm19731	PREDICTED: predicted gene, 19731 (Gm19731), miscRNA.	NonCoding
TC0X00000094.mm.1	6.59	7.85	-2.39	0.2316	0.5137	Gm6592	predicted gene 6592	Coding
TC1200000979.mm.1	14.58	15.83	-2.38	0.2073	0.4861	Rpl30-ps8	ribosomal protein L30, pseudogene 8 [Source:MGI Symbol;Acc:MGI:3643509]	Pseudogene
TC0X00002813.mm.1	14.75	16	-2.38	0.2154	0.4956	Rpl30-ps9	ribosomal protein L30, pseudogene 9	Pseudogene
TC0Y00000227.mm.1	7.59	8.84	-2.38	0.0349	0.1863	Zfy1	zinc finger protein 1, Y-linked; zinc finger protein 1, Y linked	Coding
TC0200004099.mm.1	13.22	14.47	-2.38	0.2299	0.5119	Rpl30-ps3	ribosomal protein L30, pseudogene 3	Pseudogene
TC1000002750.mm.1	10.18	11.43	-2.38	0.5327	0.7602	4930473O22Rik	RIKEN cDNA 4930473O22 gene; RIKEN cDNA 4930473O22 gene (4930473O22Rik), non-coding RNA.	NonCoding
TC0500002700.mm.1	9.91	11.16	-2.38	0.6126	0.8104	Sult1e1	sulfotransferase family 1E, member 1	Coding
TC1700000198.mm.1	9.63	10.88	-2.38	0.0077	0.0783	Zfp97	zinc finger protein 97; Synthetic construct Mus musculus clone IMAGE:100014870, MGC:180296 zinc finger protein 97 (Zfp97) mRNA, encodes complete protein.	Coding
TC0X00000267.mm.1	15.7	16.95	-2.38	0.3727	0.6428	Gm10488; Gm10230; Gm10147; Gm14632; Gm10096; Gm10058; Gm10486; Gm14819	predicted gene 10488 (Gm10488), mRNA.; predicted gene 10230 (Gm10230), mRNA.; predicted gene 10147 (Gm10147), mRNA.; predicted gene 14632 (Gm14632), mRNA.; predicted gene 10096 (Gm10096), mRNA.; predicted gene 10058 (Gm10058), mRNA.; predicted gene 10486; predicted gene 14819; predicted gene 10488	Coding
TC1300001249.mm.1	6.82	8.07	-2.38	0.202	0.4796	Gm15289	predicted gene 15289 [Source:MGI Symbol;Acc:MGI:3705710]	Pseudogene
TC1800001198.mm.1	10.07	11.32	-2.38	0.3298	0.6086	Ndufa2	NADH dehydrogenase (ubiquinone) 1 alpha subcomplex, 2	Coding
TC0900000082.mm.1	12.25	13.49	-2.38	0.045	0.2143	Gm26189	predicted gene, 26189 [Source:MGI Symbol;Acc:MGI:5455966]	Small_RNA
TC1000003056.mm.1	7.03	8.27	-2.37	0.0024	0.0383	Tmem5; Gm9079	transmembrane protein 5; transmembrane emp24 domain trafficking protein 2 pseudogene	Multiple_Complex
TC0600002289.mm.1	11.84	13.09	-2.37	0.3348	0.6132	Gm8129	predicted pseudogene 8129	Multiple_Complex
TC0200003090.mm.1	11.37	12.61	-2.37	0.3668	0.6382	Gm13342	predicted gene 13342	Multiple_Complex
TC0200004677.mm.1	7.76	9.01	-2.37	0.0459	0.2167			NonCoding
TC1000000312.mm.1	10.41	11.65	-2.37	0.0298	0.171	Hdac2	histone deacetylase 2	Multiple_Complex
TC0100003351.mm.1	10.83	12.08	-2.37	0.0157	0.1193	Cacybp	calcyclin binding protein	Coding
TC1500000020.mm.1	8.71	9.96	-2.37	0.0667	0.2672	Snord72	small nucleolar RNA, C/D box 72	Small_RNA
TC1100002660.mm.1	14.91	16.16	-2.37	0.2044	0.4826	Gm12191	predicted gene 12191 [Source:MGI Symbol;Acc:MGI:3651293]	Pseudogene
TC0900001596.mm.1	5.49	6.73	-2.37	0.0197	0.1347	Gm24044	predicted gene, 24044 [Source:MGI Symbol;Acc:MGI:5453821]	Small_RNA
TC0400002731.mm.1	8.59	9.83	-2.37	0.0132	0.1077	Txn1	thioredoxin 1	Coding
TC1100003160.mm.1	9.2	10.44	-2.37	0.1669	0.435	Gm16021	predicted gene 16021 [Source:MGI Symbol;Acc:MGI:3802111]	Multiple_Complex
TC1000001798.mm.1	7.81	9.05	-2.37	0.4496	0.701			NonCoding
TC0500002908.mm.1	10.97	12.22	-2.37	0.0402	0.201	Gm25672	predicted gene, 25672 [Source:MGI Symbol;Acc:MGI:5455449]	Small_RNA
TC1100002775.mm.1	12.26	13.5	-2.37	0.0171	0.125	Gm12231	predicted gene 12231	Pseudogene
TC0800001535.mm.1	13.84	15.08	-2.37	0.1709	0.4404	Gm4342	predicted gene 4342 [Source:MGI Symbol;Acc:MGI:3782526]	Multiple_Complex
TC0X00001651.mm.1	11.45	12.69	-2.36	0.0007	0.0166	Rbbp7	retinoblastoma binding protein 7	Coding
TC0900002161.mm.1	10.12	11.36	-2.36	0.3685	0.6395	Gm10080	predicted gene 10080 [Source:MGI Symbol;Acc:MGI:3710529]	Pseudogene
TC0900002495.mm.1	9.33	10.57	-2.36	0.2275	0.5094	Rab11a	RAB11A, member RAS oncogene family; RAB11a, member RAS oncogene family	Multiple_Complex
TC1600000801.mm.1	6.67	7.91	-2.36	0.0845	0.3036	Gm22448	predicted gene, 22448 [Source:MGI Symbol;Acc:MGI:5452225]	Small_RNA
TC1800000653.mm.1	7.14	8.38	-2.36	0.0143	0.1127	Gm22210	predicted gene, 22210 [Source:MGI Symbol;Acc:MGI:5451987]	Small_RNA
TC1900000151.mm.1	6.7	7.94	-2.36	0.0685	0.2706	Snhg1; Snord22	small nucleolar RNA host gene 1; small nucleolar RNA, C/D box 22; small nucleolar RNA host gene (non-protein coding) 1	Multiple_Complex
TC0X00002013.mm.1	15.91	17.15	-2.36	0.3597	0.6325	Gm10230; Gm10147; Gm10487; Gm14632; Gm10096; Gm10058; Gm10486; Gm14819; Gm4836	predicted gene 10230 (Gm10230), mRNA.; predicted gene 10147 (Gm10147), mRNA.; predicted gene 10487 (Gm10487), mRNA.; predicted gene 14632 (Gm14632), mRNA.; predicted gene 10096 (Gm10096), mRNA.; predicted gene 10058 (Gm10058), mRNA.; predicted gene 10486 (Gm10486), mRNA.; predicted gene 14819 (Gm14819), mRNA.; predicted gene 4836 (Gm4836), mRNA.; predicted gene 10487; predicted gene 10486	Coding
TC0200004378.mm.1	8.7	9.93	-2.36	0.5211	0.7516	4930528P14Rik	RIKEN cDNA 4930528P14 gene	NonCoding
TC0X00000799.mm.1	10.19	11.43	-2.36	0.3659	0.6375	Gm6954	predicted pseudogene 6954 [Source:MGI Symbol;Acc:MGI:3648228]	Multiple_Complex
TC1000002628.mm.1	13.17	14.41	-2.36	0.2281	0.51	Fabp3-ps1	fatty acid binding protein 3, muscle and heart, pseudogene 1 [Source:MGI Symbol;Acc:MGI:101929]	Pseudogene
TC0700001200.mm.1	10.56	11.8	-2.36	0.0826	0.2994	Gm20077	PREDICTED: predicted gene, 20077 (Gm20077), miscRNA.	NonCoding
TC1200001834.mm.1	8.78	10.01	-2.36	0.0045	0.0571	Mis18bp1	MIS18 binding protein 1	Multiple_Complex
TC0900000244.mm.1	10.41	11.64	-2.36	0.0061	0.0683	2018-09-07	septin 7	Coding
TC0X00000269.mm.1	15.9	17.14	-2.36	0.3722	0.6425	Gm10488; Gm10230; Gm10147; Gm10487; Gm14632; Gm10096; Gm10058; Gm10486; Gm14819; Gm4836	predicted gene 10488 (Gm10488), mRNA.; predicted gene 10230 (Gm10230), mRNA.; predicted gene 10147 (Gm10147), mRNA.; predicted gene 10487 (Gm10487), mRNA.; predicted gene 14632 (Gm14632), mRNA.; predicted gene 10096 (Gm10096), mRNA.; predicted gene 10058 (Gm10058), mRNA.; predicted gene 10486 (Gm10486), mRNA.; predicted gene 14819 (Gm14819), mRNA.; predicted gene 4836 (Gm4836), mRNA.; predicted g…	Coding
TC0X00000308.mm.1	15.9	17.14	-2.36	0.3722	0.6425	Gm10488; Gm10230; Gm10147; Gm10487; Gm14632; Gm10096; Gm10058; Gm10486; Gm14819; Gm4836	predicted gene 10488 (Gm10488), mRNA.; predicted gene 10230 (Gm10230), mRNA.; predicted gene 10147 (Gm10147), mRNA.; predicted gene 10487 (Gm10487), mRNA.; predicted gene 14632 (Gm14632), mRNA.; predicted gene 10096 (Gm10096), mRNA.; predicted gene 10058 (Gm10058), mRNA.; predicted gene 10486 (Gm10486), mRNA.; predicted gene 14819 (Gm14819), mRNA.; predicted gene 4836; predicted gene 14819; predi…	Coding
TC0X00001990.mm.1	15.9	17.14	-2.36	0.3722	0.6425	Gm10488; Gm10230; Gm10147; Gm10487; Gm14632; Gm10096; Gm10058; Gm10486; Gm14819; Gm4836	predicted gene 10488 (Gm10488), mRNA.; predicted gene 10230; predicted gene 10147 (Gm10147), mRNA.; predicted gene 10487 (Gm10487), mRNA.; predicted gene 14632 (Gm14632), mRNA.; predicted gene 10096 (Gm10096), mRNA.; predicted gene 10058 (Gm10058), mRNA.; predicted gene 10486 (Gm10486), mRNA.; predicted gene 14819 (Gm14819), mRNA.; predicted gene 4836 (Gm4836), mRNA.; predicted gene 10486	Coding
TC0X00001995.mm.1	15.9	17.14	-2.36	0.3722	0.6425	Gm10488; Gm10230; Gm10147; Gm10487; Gm14632; Gm10096; Gm10058; Gm10486; Gm14819; Gm4836	predicted gene 10488 (Gm10488), mRNA.; predicted gene 10230 (Gm10230), mRNA.; predicted gene 10147 (Gm10147), mRNA.; predicted gene 10487 (Gm10487), mRNA.; predicted gene 14632; predicted gene 10096 (Gm10096), mRNA.; predicted gene 10058; predicted gene 10486 (Gm10486), mRNA.; predicted gene 14819 (Gm14819), mRNA.; predicted gene 4836 (Gm4836), mRNA.; predicted gene 10486	Coding
TC0X00001998.mm.1	15.9	17.14	-2.36	0.3722	0.6425	Gm10488; Gm10230; Gm10147; Gm10487; Gm14632; Gm10096; Gm10058; Gm10486; Gm14819; Gm4836	predicted gene 10488 (Gm10488), mRNA.; predicted gene 10230 (Gm10230), mRNA.; predicted gene 10147 (Gm10147), mRNA.; predicted gene 10487 (Gm10487), mRNA.; predicted gene 14632 (Gm14632), mRNA.; predicted gene 10096 (Gm10096), mRNA.; predicted gene 10058 (Gm10058), mRNA.; predicted gene 10486 (Gm10486), mRNA.; predicted gene 14819 (Gm14819), mRNA.; predicted gene 4836 (Gm4836), mRNA.; predicted g…	Coding
TC0X00002002.mm.1	15.9	17.14	-2.36	0.3722	0.6425	Gm10488; Gm10230; Gm10147; Gm10487; Gm14632; Gm10096; Gm10058; Gm10486; Gm14819; Gm4836	predicted gene 10488; predicted gene 10230 (Gm10230), mRNA.; predicted gene 10147 (Gm10147), mRNA.; predicted gene 10487; predicted gene 14632 (Gm14632), mRNA.; predicted gene 10096 (Gm10096), mRNA.; predicted gene 10058 (Gm10058), mRNA.; predicted gene 10486 (Gm10486), mRNA.; predicted gene 14819 (Gm14819), mRNA.; predicted gene 4836 (Gm4836), mRNA.; predicted gene 10096; predicted gene 10486	Coding
TC0700004283.mm.1	14.95	16.18	-2.36	0.0122	0.1025	Gm24596	predicted gene, 24596 [Source:MGI Symbol;Acc:MGI:5454373]	Small_RNA
TC1600002086.mm.1	14.7	15.94	-2.35	0.0332	0.1815	Gm25245	predicted gene, 25245 [Source:MGI Symbol;Acc:MGI:5455022]	Small_RNA
TC0600002337.mm.1	5.62	6.86	-2.35	0.2129	0.4928	Lsm5	LSM5 homolog, U6 small nuclear RNA associated (S. cerevisiae)	Multiple_Complex
TC0X00001969.mm.1	15.88	17.11	-2.35	0.3704	0.6413	Gm10230; Gm10147; Gm14632; Gm10096; Gm10058; Gm10486; Gm14819; Gm10488	predicted gene 10230 (Gm10230), mRNA.; predicted gene 10147; predicted gene 14632 (Gm14632), mRNA.; predicted gene 10096; predicted gene 10058 (Gm10058), mRNA.; predicted gene 10486 (Gm10486), mRNA.; predicted gene 14819 (Gm14819), mRNA.; predicted gene 10486; predicted gene 10488	Multiple_Complex
TC0X00001991.mm.1	15.88	17.11	-2.35	0.3704	0.6413	Gm10230; Gm10147; Gm14632; Gm10096; Gm10058; Gm10486; Gm14819	predicted gene 10230 (Gm10230), mRNA.; predicted gene 10147 (Gm10147), mRNA.; predicted gene 14632 (Gm14632), mRNA.; predicted gene 10096 (Gm10096), mRNA.; predicted gene 10058 (Gm10058), mRNA.; predicted gene 10486 (Gm10486), mRNA.; predicted gene 14819 (Gm14819), mRNA.	Multiple_Complex
TC1400001900.mm.1	7.17	8.4	-2.35	0.2749	0.5578	Gnpnat1	glucosamine-phosphate N-acetyltransferase 1	Multiple_Complex
TC1900001754.mm.1	9.03	10.27	-2.35	0.0003	0.0089	Prdx3	peroxiredoxin 3	Coding
TC1300002689.mm.1	5.78	7.01	-2.35	0.0258	0.1574	Gpx8	glutathione peroxidase 8 (putative)	Coding
TC0100002498.mm.1	14.8	16.03	-2.35	0.1126	0.3531	Rpl31-ps14	ribosomal protein L31, pseudogene 14	Pseudogene
TC1700002433.mm.1	15.52	16.76	-2.35	0.1805	0.4528	Gm4705	predicted gene 4705	Multiple_Complex
TC0500001744.mm.1	10.57	11.8	-2.35	0.0842	0.3029	Gm24311	predicted gene, 24311 [Source:MGI Symbol;Acc:MGI:5454088]	Small_RNA
TC1100002216.mm.1	11.79	13.03	-2.35	0.0669	0.2675	Eif3s6-ps1	eukaryotic translation initiation factor 3, subunit 6, pseudogene 1	Multiple_Complex
TC1500001356.mm.1	8.64	9.87	-2.35	0.0703	0.2744	Stk3	serine/threonine kinase 3	Multiple_Complex
TC0700004513.mm.1	6.17	7.41	-2.35	3.64e-06	0.0005	Ifitm2	interferon induced transmembrane protein 2	Coding
TC0600000555.mm.1	9.33	10.56	-2.35	0.2515	0.5341	Gm10243	predicted gene 10243	Pseudogene
TC1200001736.mm.1	5.66	6.89	-2.35	0.0238	0.1502	n-R5s58	nuclear encoded rRNA 5S 58 [Source:MGI Symbol;Acc:MGI:4421903]	Ribosomal
TC0X00000066.mm.1	12.43	13.65	-2.34	0.029	0.1682	Smt3h2-ps	SMT3 suppressor of mif two 3 homolog 2, pseudogene (S. cerevisiae)	Pseudogene
TC0900001906.mm.1	9.9	11.13	-2.34	0.0042	0.0543	Gm10182	predicted pseudogene 10182 [Source:MGI Symbol;Acc:MGI:3704327]	Multiple_Complex
TC1100004168.mm.1	8.75	9.98	-2.34	0.5336	0.7609	Gm11749; RP23-386D6.3	predicted gene 11749 [Source:MGI Symbol;Acc:MGI:3652041]; novel transcript	NonCoding
TC0200000590.mm.1	9.17	10.4	-2.34	0.0026	0.0402	Gm26236	predicted gene, 26236 [Source:MGI Symbol;Acc:MGI:5456013]	Small_RNA
TC1100003846.mm.1	8.22	9.45	-2.34	0.0776	0.2893	Gm25337	predicted gene, 25337 [Source:MGI Symbol;Acc:MGI:5455114]	Small_RNA
TC0400002728.mm.1	14.45	15.68	-2.34	0.0534	0.2361	Gm26138	predicted gene, 26138 [Source:MGI Symbol;Acc:MGI:5455915]	Small_RNA
TC1700000867.mm.1	12.77	14	-2.34	0.046	0.2169	Gm25008	predicted gene, 25008 [Source:MGI Symbol;Acc:MGI:5454785]	Small_RNA
TC0200000421.mm.1	9.63	10.86	-2.34	0.3507	0.6256	Gm13433	predicted gene 13433 [Source:MGI Symbol;Acc:MGI:3651454]	Multiple_Complex
TC0800000987.mm.1	7.81	9.04	-2.34	0.0021	0.0355	Orc6	origin recognition complex, subunit 6	Multiple_Complex
TC1600001411.mm.1	11.1	12.32	-2.34	0.0311	0.175	Gm24928	predicted gene, 24928 [Source:MGI Symbol;Acc:MGI:5454705]	Small_RNA
TC0200003548.mm.1	11.51	12.74	-2.34	0.1648	0.4321	Gm13502	predicted gene 13502	Pseudogene
TC0400002683.mm.1	8.2	9.42	-2.34	0.0598	0.2513	Gm25419	predicted gene, 25419 [Source:MGI Symbol;Acc:MGI:5455196]	Small_RNA
TC0600003335.mm.1	7.35	8.57	-2.34	0.0044	0.0558	Mgp	matrix Gla protein	Coding
TC1900001335.mm.1	14.24	15.46	-2.34	0.3071	0.588	Gm10136	predicted pseudogene 10136	Pseudogene
TC0100003469.mm.1	8.17	9.4	-2.34	0.2939	0.5759	Gm16418	predicted pseudogene 16418 [Source:MGI Symbol;Acc:MGI:3644548]	Pseudogene
TC0100003106.mm.1	6.35	7.58	-2.34	0.0466	0.2184	Gm24517	predicted gene, 24517 [Source:MGI Symbol;Acc:MGI:5454294]	Small_RNA
TC0X00001996.mm.1	15.93	17.15	-2.33	0.348	0.6238	Gm10230; Gm10147; Gm10487; Gm14632; Gm10096; Gm10058; Gm10486; Gm14819; Gm4836	predicted gene 10230 (Gm10230), mRNA.; predicted gene 10147 (Gm10147), mRNA.; predicted gene 10487 (Gm10487), mRNA.; predicted gene 14632 (Gm14632), mRNA.; predicted gene 10096 (Gm10096), mRNA.; predicted gene 10058 (Gm10058), mRNA.; predicted gene 10486 (Gm10486), mRNA.; predicted gene 14819 (Gm14819), mRNA.; predicted gene 4836 (Gm4836), mRNA.; predicted gene 4836; predicted gene 10486	Coding
TC1100001588.mm.1	10.59	11.81	-2.33	0.0291	0.1686	Gm22061	predicted gene, 22061 [Source:MGI Symbol;Acc:MGI:5451838]	Small_RNA
TC0X00001982.mm.1	16.15	17.37	-2.33	0.3113	0.5922	Gm2005	predicted pseudogene 2005 [Source:MGI Symbol;Acc:MGI:3780175]	Pseudogene
TC0700000951.mm.1	9.31	10.53	-2.33	0.0488	0.2242			NonCoding
TC1600000306.mm.1	8.91	10.13	-2.33	0.0287	0.1673	Gm6467	predicted gene 6467 [Source:MGI Symbol;Acc:MGI:3645284]	Pseudogene
TC1300001628.mm.1	8.33	9.55	-2.33	0.1931	0.4687	Gm11335; RP23-283N14.2	predicted gene 11335 [Source:MGI Symbol;Acc:MGI:3705194]; novel transcript	NonCoding
TC0X00000306.mm.1	15.93	17.15	-2.33	0.3535	0.6273	Gm10488; Gm10230; Gm10147; Gm10487; Gm14632; Gm10096; Gm10058; Gm10486; Gm14819; Gm4836	predicted gene 10488 (Gm10488), mRNA.; predicted gene 10230 (Gm10230), mRNA.; predicted gene 10147 (Gm10147), mRNA.; predicted gene 10487 (Gm10487), mRNA.; predicted gene 14632 (Gm14632), mRNA.; predicted gene 10096 (Gm10096), mRNA.; predicted gene 10058 (Gm10058), mRNA.; predicted gene 10486 (Gm10486), mRNA.; predicted gene 14819 (Gm14819), mRNA.; predicted gene 4836 (Gm4836), mRNA.; predicted g…	Coding
TC0X00002229.mm.1	5.78	7	-2.33	0.0977	0.328	LOC100861729	PREDICTED: uncharacterized LOC100861729, transcript variant 1 (LOC100861729), miscRNA.; PREDICTED: uncharacterized LOC100861729, transcript variant 2 (LOC100861729), miscRNA.	NonCoding
TC0600001188.mm.1	10.95	12.17	-2.33	0.0395	0.199	Gm22418	predicted gene, 22418 [Source:MGI Symbol;Acc:MGI:5452195]	Small_RNA
TC0900002569.mm.1	11.94	13.16	-2.33	0.0536	0.2364	Gm22169	predicted gene, 22169 [Source:MGI Symbol;Acc:MGI:5451946]	Small_RNA
TC0X00000718.mm.1	12.49	13.71	-2.33	0.0496	0.2261	Gm26125	predicted gene, 26125 [Source:MGI Symbol;Acc:MGI:5455902]	Small_RNA
TC1000001055.mm.1	8.33	9.55	-2.33	0.0018	0.0318	Tex18	PREDICTED: testis expressed gene 18 (Tex18), miscRNA.	NonCoding
TC0600003360.mm.1	10.84	12.06	-2.33	0.5355	0.7622	Rpl38-ps2	ribosomal protein L38, pseudogene 2	Multiple_Complex
TC0100000168.mm.1	14.42	15.64	-2.33	0.0586	0.2485			NonCoding
TC0X00001979.mm.1	14.7	15.92	-2.32	0.3804	0.6487	Gm2012	predicted gene 2012	Coding
TC1600001719.mm.1	5.97	7.19	-2.32	0.0969	0.3265	Gm23513	predicted gene, 23513 [Source:MGI Symbol;Acc:MGI:5453290]	Small_RNA
TC1600000109.mm.1	12.06	13.27	-2.32	0.3553	0.6285	Rpl39l	ribosomal protein L39-like	Coding
TC0400001543.mm.1	12.84	14.05	-2.32	0.1407	0.3969	Fabp3	fatty acid binding protein 3, muscle and heart	Coding
TC0X00000253.mm.1	16.07	17.28	-2.32	0.3032	0.584	Gm7375	predicted pseudogene 7375 [Source:MGI Symbol;Acc:MGI:3646621]	Pseudogene
TC0X00000258.mm.1	16.07	17.28	-2.32	0.3032	0.584	Gm7398	predicted gene 7398 [Source:MGI Symbol;Acc:MGI:3647496]	Pseudogene
TC0X00002011.mm.1	16.07	17.28	-2.32	0.3032	0.584	Gm3681	predicted gene 3681 [Source:MGI Symbol;Acc:MGI:3781857]	Pseudogene
TC0X00002037.mm.1	16.07	17.28	-2.32	0.3032	0.584	Gm2318	predicted gene 2318 [Source:MGI Symbol;Acc:MGI:3780489]	Pseudogene
TC0X00000243.mm.1	15.17	16.38	-2.32	0.3888	0.6556	Gm9440	predicted gene 9440 [Source:MGI Symbol;Acc:MGI:3644966]	Pseudogene
TC0200003702.mm.1	7.32	8.53	-2.32	0.1939	0.4698	Gm13622	predicted gene 13622 [Source:MGI Symbol;Acc:MGI:3652182]	Multiple_Complex
TC0X00001128.mm.1	9.1	10.31	-2.32	0.0043	0.0554	Zfp711	zinc finger protein 711	Multiple_Complex
TC0500001188.mm.1	11.2	12.42	-2.32	0.0398	0.2	Gm22740	predicted gene, 22740 [Source:MGI Symbol;Acc:MGI:5452517]	Small_RNA
TC0100000153.mm.1	7.06	8.27	-2.32	0.0149	0.1158			NonCoding
TC1100002240.mm.1	6.36	7.58	-2.32	0.0393	0.1985	Sec61g	SEC61, gamma subunit	Multiple_Complex
TC0400002852.mm.1	13.07	14.28	-2.32	0.0586	0.2484	Rps18-ps1	ribosomal protein S18, pseudogene 1	Pseudogene
TC0X00003125.mm.1	8.8	10.02	-2.32	0.1995	0.4768	Gm2214	predicted gene 2214 [Source:MGI Symbol;Acc:MGI:3780384]	Pseudogene
TC0X00001157.mm.1	7.04	8.25	-2.32	0.0787	0.2914	Gm24624	predicted gene, 24624 [Source:MGI Symbol;Acc:MGI:5454401]	Small_RNA
TC0200005327.mm.1	9.72	10.93	-2.32	0.224	0.5055	Gm16354	predicted gene 16354 [Source:MGI Symbol;Acc:MGI:3840116]	Pseudogene
TC0X00001962.mm.1	7.74	8.95	-2.32	0.4766	0.7206	Gm27192; RP23-29K3.3	predicted gene 27192 [Source:MGI Symbol;Acc:MGI:5521035]; novel transcript	NonCoding
TC0X00001988.mm.1	15.97	17.18	-2.31	0.2918	0.5737	Gm7365	predicted gene 7365 [Source:MGI Symbol;Acc:MGI:3779735]	Pseudogene
TC1500001930.mm.1	7.95	9.16	-2.31	0.2172	0.4978	Gm8444	predicted gene 8444 [Source:MGI Symbol;Acc:MGI:3645809]	Coding
TC0X00000255.mm.1	16.06	17.27	-2.31	0.3034	0.5842	Gm7386	predicted pseudogene 7386 [Source:MGI Symbol;Acc:MGI:3643741]	Pseudogene
TC0X00000260.mm.1	16.06	17.27	-2.31	0.3034	0.5842	Gm7408	predicted pseudogene 7408 [Source:MGI Symbol;Acc:MGI:3647245]	Pseudogene
TC0X00000263.mm.1	16.06	17.27	-2.31	0.3034	0.5842	Gm7415	predicted pseudogene 7415 [Source:MGI Symbol;Acc:MGI:3647748]	Pseudogene
TC0X00000271.mm.1	16.06	17.27	-2.31	0.3034	0.5842	Gm7438	predicted pseudogene 7438 [Source:MGI Symbol;Acc:MGI:3646492]	Pseudogene
TC0X00002009.mm.1	16.06	17.27	-2.31	0.3034	0.5842	Gm3657	predicted gene 3657 [Source:MGI Symbol;Acc:MGI:3781833]	Pseudogene
TC0X00002035.mm.1	16.06	17.27	-2.31	0.3034	0.5842	Gm2288	predicted gene 2288 [Source:MGI Symbol;Acc:MGI:3780459]	Pseudogene
TC0200003399.mm.1	6.01	7.21	-2.31	0.0299	0.171	Snord90	small nucleolar RNA, C/D box 90	Small_RNA
TC0400003363.mm.1	9.25	10.46	-2.31	0.0082	0.0807	Gm22980	predicted gene, 22980 [Source:MGI Symbol;Acc:MGI:5452757]	Small_RNA
TC0500000749.mm.1	7.15	8.36	-2.31	0.0713	0.2764	Gm22974	predicted gene, 22974 [Source:MGI Symbol;Acc:MGI:5452751]	Small_RNA
TC0X00003218.mm.1	10.36	11.57	-2.31	0.4553	0.7052	Gm16445	predicted pseudogene 16445	Multiple_Complex
TC0700000552.mm.1	6.34	7.55	-2.31	0.1371	0.3917	Cox7a1	cytochrome c oxidase subunit VIIa 1	Coding
TC0X00000994.mm.1	11.19	12.39	-2.31	0.2886	0.571	Gm14859	predicted gene 14859 [Source:MGI Symbol;Acc:MGI:3705727]	Multiple_Complex
TC0X00001400.mm.1	10.45	11.65	-2.3	0.0015	0.0285	Gm6382	predicted gene 6382 [Source:MGI Symbol;Acc:MGI:3646438]	Pseudogene
TC0500002065.mm.1	12.46	13.66	-2.3	0.2836	0.5659	Tomm7	translocase of outer mitochondrial membrane 7 homolog (yeast)	Coding
TC0700000204.mm.1	3.84	5.05	-2.3	0.1157	0.3584	Obox4-ps28	oocyte specific homeobox 4, pseudogene 28	Pseudogene
TC0700004163.mm.1	12.12	13.33	-2.3	0.044	0.2116	Gm26054	predicted gene, 26054 [Source:MGI Symbol;Acc:MGI:5455831]	Small_RNA
TC1300002760.mm.1	12.97	14.18	-2.3	0.1426	0.4001	Gm20900	predicted gene, 20900 [Source:MGI Symbol;Acc:MGI:5434256]	Pseudogene
TC0200001755.mm.1	7.82	9.03	-2.3	0.3858	0.6531	Gm14088	predicted gene 14088 [Source:MGI Symbol;Acc:MGI:3650492]	Multiple_Complex
TC1600000223.mm.1	9.32	10.53	-2.3	0.3469	0.6231	Rpl26-ps4	ribosomal protein L26, pseudogene 4 [Source:MGI Symbol;Acc:MGI:3644695]	Pseudogene
TC0500002904.mm.1	7.09	8.29	-2.3	0.5928	0.7984	Rps15a-ps5	ribosomal protein S15A, pseudogene 5	Pseudogene
TC0X00002417.mm.1	6.21	7.41	-2.3	0.0106	0.0943	Xlr4a	X-linked lymphocyte-regulated 4A	Multiple_Complex
TC1600000986.mm.1	6.69	7.89	-2.3	0.0308	0.174	Gm23406	predicted gene, 23406 [Source:MGI Symbol;Acc:MGI:5453183]	Small_RNA
TC1500001721.mm.1	9.88	11.09	-2.3	0.0484	0.2234	Gml	glycosylphosphatidylinositol anchored molecule like; GPI anchored molecule like protein	Coding
TC1700002751.mm.1	9.08	10.28	-2.3	0.0942	0.3219	Gm25935	predicted gene, 25935 [Source:MGI Symbol;Acc:MGI:5455712]	Small_RNA
TC0200005357.mm.1	8.69	9.89	-2.3	0.1223	0.3686	Gm14421	predicted gene 14421 [Source:MGI Symbol;Acc:MGI:3652254]	Multiple_Complex
TC0200001102.mm.1	10.73	11.93	-2.3	0.0418	0.2059	Mtx2	metaxin 2	Multiple_Complex
TC1100002173.mm.1	5.73	6.93	-2.3	0.427	0.6849	Gm11972	predicted gene 11972 [Source:MGI Symbol;Acc:MGI:3650055]	Multiple_Complex
TC0400004109.mm.1	9.18	10.38	-2.3	0.4604	0.7086			NonCoding
TC0700000627.mm.1	11.13	12.33	-2.3	0.0511	0.2304	Gm12755	predicted gene 12755 [Source:MGI Symbol;Acc:MGI:3649708]	Multiple_Complex
TC0Y00000233.mm.1	7.02	8.22	-2.3	0.0049	0.0601	Uty	ubiquitously transcribed tetratricopeptide repeat gene, Y chromosome	Multiple_Complex
TC0X00001739.mm.1	5.47	6.67	-2.29	0.5523	0.773			NonCoding
TC0X00002007.mm.1	9.85	11.05	-2.29	0.1352	0.3888	Gm15432	predicted gene 15432 [Source:MGI Symbol;Acc:MGI:3801969]	Pseudogene
TC1300002491.mm.1	14.09	15.29	-2.29	0.0421	0.2062	Gm10260	predicted gene 10260 [Source:MGI Symbol;Acc:MGI:3642298]	Coding
TC0500001920.mm.1	8.47	9.66	-2.29	0.0578	0.2465	Gm24525	predicted gene, 24525 [Source:MGI Symbol;Acc:MGI:5454302]	Small_RNA
TC0900001929.mm.1	7.62	8.82	-2.29	0.0636	0.2602			NonCoding
TC0200004393.mm.1	16.18	17.38	-2.29	0.019	0.1324	Gm25514	predicted gene, 25514 [Source:MGI Symbol;Acc:MGI:5455291]	Small_RNA
TC1900000293.mm.1	11.01	12.21	-2.29	0.0265	0.1601	Gm24319	predicted gene, 24319 [Source:MGI Symbol;Acc:MGI:5454096]	Small_RNA
TC0700000271.mm.1	9.11	10.31	-2.29	0.2384	0.5211	Sycp1-ps1	synaptonemal complex protein 1, pseudogene 1	NonCoding
TC0400000081.mm.1	9.25	10.45	-2.29	0.0184	0.1301	Gm11829	predicted gene 11829 [Source:MGI Symbol;Acc:MGI:3649804]	Pseudogene
TC1300000965.mm.1	7.4	8.6	-2.29	0.0049	0.0596	Lysmd3	LysM, putative peptidoglycan-binding, domain containing 3	Coding
TC1400002860.mm.1	13.84	15.03	-2.29	0.421	0.6805	Gm10377	predicted gene 10377 (Gm10377), mRNA.	Coding
TC1100003452.mm.1	13.19	14.39	-2.29	0.0603	0.2525	Gm11478	predicted gene 11478 [Source:MGI Symbol;Acc:MGI:3650888]	Pseudogene
TC0600000931.mm.1	8.43	9.62	-2.29	0.2344	0.5162			NonCoding
TC0100000984.mm.1	8.82	10.01	-2.29	0.0093	0.087	Gm20253	PREDICTED: predicted gene, 20253 (Gm20253), miscRNA.	NonCoding
TC0200003660.mm.1	7.24	8.43	-2.28	0.6082	0.8079			NonCoding
TC0X00001245.mm.1	9.81	11	-2.28	0.2745	0.5574			NonCoding
TC0300002264.mm.1	6.97	8.16	-2.28	0.0104	0.0927	Snord73a	small nucleolar RNA, C/D box U73A	Small_RNA
TC1100000895.mm.1	5.52	6.71	-2.28	0.17	0.4393	Snord118	small nucleolar RNA, C/D box 118	Small_RNA
TC0X00001947.mm.1	13.86	15.05	-2.28	0.0408	0.2026	Gm24535	predicted gene, 24535 [Source:MGI Symbol;Acc:MGI:5454312]	Small_RNA
TC0600003040.mm.1	10.9	12.09	-2.28	0.0559	0.2421	Gm24592	predicted gene, 24592 [Source:MGI Symbol;Acc:MGI:5454369]	Small_RNA
TC0400002437.mm.1	10.1	11.29	-2.28	0.0643	0.262	Ndufb6	NADH dehydrogenase (ubiquinone) 1 beta subcomplex, 6	Coding
TC1000002562.mm.1	8.57	9.76	-2.28	0.4177	0.6785	Zfp938	zinc finger protein 938	Coding
TC1000000084.mm.1	6.25	7.43	-2.28	0.224	0.5055	Gm9797	predicted pseudogene 9797 [Source:MGI Symbol;Acc:MGI:3704349]	Pseudogene
TC0700001730.mm.1	8.81	10	-2.28	0.3721	0.6425	Gm7226	PREDICTED: predicted gene 7226 (Gm7226), mRNA.	Coding
TC1500000499.mm.1	7.17	8.35	-2.28	0.1228	0.3693	Gm25987	predicted gene, 25987 [Source:MGI Symbol;Acc:MGI:5455764]	Small_RNA
TC0200005328.mm.1	8.54	9.73	-2.28	0.2055	0.484	Gm14393	predicted gene 14393	Coding
TC0200002748.mm.1	8.69	9.88	-2.28	0.0297	0.1705	Gm14420	predicted gene 14420	Coding
TC0700004484.mm.1	10.89	12.08	-2.28	0.2737	0.5564	Gm4459	predicted gene 4459 [Source:MGI Symbol;Acc:MGI:3782643]	Pseudogene
TC0X00002154.mm.1	7.31	8.5	-2.27	0.0054	0.0637	Smarca1	SWI/SNF related, matrix associated, actin dependent regulator of chromatin, subfamily a, member 1	Multiple_Complex
TC1800000051.mm.1	10.92	12.11	-2.27	0.0211	0.1396	Gm24292	predicted gene, 24292 [Source:MGI Symbol;Acc:MGI:5454069]	Small_RNA
TC0100003454.mm.1	11.27	12.46	-2.27	0.0583	0.2478	Gm23402	predicted gene, 23402 [Source:MGI Symbol;Acc:MGI:5453179]	Small_RNA
TC0700001313.mm.1	8.32	9.51	-2.27	0.0004	0.012	Gm26944; RP23-474B13.3	predicted gene, 26944 [Source:MGI Symbol;Acc:MGI:5504059]; novel transcript	NonCoding
TC0200004758.mm.1	6.54	7.73	-2.27	0.0261	0.1584	Gm26165	predicted gene, 26165 [Source:MGI Symbol;Acc:MGI:5455942]	Small_RNA
TC0300000292.mm.1	12.65	13.83	-2.27	0.1786	0.4504	Rpl31-ps15	ribosomal protein L31, pseudogene 15	Pseudogene
TC0700004322.mm.1	8.86	10.04	-2.27	0.1073	0.3447	Gm17511	predicted gene, 17511	Coding
TC0Y00000191.mm.1	15.74	16.93	-2.27	0.4242	0.6828	LOC380994; LOC100862016; Gm20736	similar to Sycp3 like Y-linked, mRNA (cDNA clone MGC:118285 IMAGE:6705131), complete cds.; PREDICTED: X-linked lymphocyte-regulated protein PM1-like (LOC100862016), mRNA.; predicted gene, 20736	Coding
TC0X00001745.mm.1	4.94	6.12	-2.27	0.4607	0.7087			NonCoding
TC0100001414.mm.1	14.25	15.43	-2.27	0.1796	0.4518	Gm2000	predicted gene 2000 [Source:MGI Symbol;Acc:MGI:3780170]	Coding
TC0500002126.mm.1	10.12	11.3	-2.27	0.4388	0.6936	Gm16056	predicted gene 16056 [Source:MGI Symbol;Acc:MGI:3802028]	Pseudogene
TC1800001327.mm.1	6.6	7.78	-2.27	0.0332	0.1816	Gm25785	predicted gene, 25785 [Source:MGI Symbol;Acc:MGI:5455562]	Small_RNA
TC0X00002006.mm.1	15.86	17.04	-2.27	0.3017	0.5826	Gm7421; LOC100862354	predicted gene 7421 [Source:MGI Symbol;Acc:MGI:3779744]; PREDICTED: X-linked lymphocyte-regulated protein PM1-like (LOC100862354), mRNA.	Multiple_Complex
TC0X00000120.mm.1	12.21	13.39	-2.26	0.4983	0.7356	Hypm	huntingtin interacting protein M	Coding
TC1600000972.mm.1	10.15	11.33	-2.26	0.1369	0.3914	Gm10061	predicted gene 10061 [Source:MGI Symbol;Acc:MGI:3642175]	Coding
TC1400001899.mm.1	8.35	9.52	-2.26	0.6445	0.8296	Gm20266	PREDICTED: predicted gene, 20266, transcript variant 2 (Gm20266), miscRNA.	NonCoding
TC0200002736.mm.1	6.87	8.04	-2.26	0.1027	0.3373	Gm14405	predicted gene 14405	Multiple_Complex
TC0X00001965.mm.1	13.12	14.29	-2.26	0.3118	0.5928	Gm4297	predicted gene 4297	Coding
TC0200005250.mm.1	11.17	12.35	-2.26	0.0992	0.3309	Gm14269	predicted gene 14269 [Source:MGI Symbol;Acc:MGI:3650060]	Multiple_Complex
TC0X00001284.mm.1	12.12	13.3	-2.26	0.1969	0.4735	Gm7857	predicted gene 7857 [Source:MGI Symbol;Acc:MGI:3644849]	Multiple_Complex
TC0200004729.mm.1	7.66	8.83	-2.26	0.0005	0.0138	Esf1	ESF1, nucleolar pre-rRNA processing protein, homolog (S. cerevisiae)	Multiple_Complex
TC1500000513.mm.1	12.58	13.75	-2.25	0.2345	0.5165	Gm3150	predicted gene 3150	Coding
TC1300001631.mm.1	4.76	5.94	-2.25	0.0041	0.054	Hist1h4f	histone cluster 1, H4f; Synthetic construct Mus musculus clone IMAGE:100062238, MGC:190425 histone cluster 1, H4f (Hist1h4f) mRNA, encodes complete protein.	Coding
TC0500000005.mm.1	8.29	9.47	-2.25	0.664	0.8411	Gm15772	predicted gene 15772	Pseudogene
TC0Y00000557.mm.1	16.08	17.25	-2.25	0.3167	0.5974	Gm20871	predicted gene, 20871 (Gm20871), non-coding RNA.	Multiple_Complex
TC1200000115.mm.1	8.16	9.33	-2.25	0.18	0.452	Gm25414	predicted gene, 25414 [Source:MGI Symbol;Acc:MGI:5455191]	Small_RNA
TC0X00003216.mm.1	11.6	12.77	-2.25	0.5006	0.7371	4921511M17Rik; Gm15140; Samt1	RIKEN cDNA 4921511M17 gene (4921511M17Rik), mRNA.; predicted gene 15140 (Gm15140), mRNA.; spermatogenesis associated multipass transmembrane protein 1; predicted gene 15140	Coding
TC0X00001961.mm.1	12.55	13.72	-2.25	0.312	0.593	Gm6956	predicted gene 6956 [Source:MGI Symbol;Acc:MGI:3648219]	Pseudogene
TC1600000459.mm.1	12.83	13.99	-2.25	0.0738	0.2817	n-R5s33	nuclear encoded rRNA 5S 33 [Source:MGI Symbol;Acc:MGI:4421878]	Ribosomal
TC1600001593.mm.1	7.34	8.5	-2.25	0.2987	0.5799	Ndufb4	NADH dehydrogenase (ubiquinone) 1 beta subcomplex 4	Multiple_Complex
TC0700000949.mm.1	9.64	10.81	-2.25	0.0582	0.2476	Ube3a	ubiquitin protein ligase E3A	Multiple_Complex
TC1800000081.mm.1	8.26	9.43	-2.25	0.3485	0.6242	Snrpd1	small nuclear ribonucleoprotein D1	Multiple_Complex
TC0600001821.mm.1	8.51	9.67	-2.24	0.2884	0.5708	Shfm1	split hand/foot malformation (ectrodactyly) type 1	Coding
TC0100003092.mm.1	7.67	8.84	-2.24	0.0854	0.3053	Snrpe	small nuclear ribonucleoprotein E	Coding
TC1300000310.mm.1	13.54	14.7	-2.24	0.0687	0.2709	Gm11361	predicted pseudogene 11361 [Source:MGI Symbol;Acc:MGI:3649931]	Pseudogene
TC0500002790.mm.1	8.28	9.44	-2.24	0.0324	0.1793	Cnot6l	CCR4-NOT transcription complex, subunit 6-like; CCR4-NOT transcription complex, subunit 6-like (Cnot6l), transcript variant 2, mRNA.	Multiple_Complex
TC0300002259.mm.1	12.2	13.36	-2.24	0.073	0.2798	Gm26204	predicted gene, 26204 [Source:MGI Symbol;Acc:MGI:5455981]	Small_RNA
TC1800001582.mm.1	6.65	7.82	-2.24	0.735	0.8804			NonCoding
TC1700000401.mm.1	9.09	10.25	-2.24	0.467	0.7128			NonCoding
TC0X00001809.mm.1	5.08	6.24	-2.24	0.1435	0.4015	Gm14502	predicted gene 14502 [Source:MGI Symbol;Acc:MGI:3705819]	Multiple_Complex
TC0300002241.mm.1	6.24	7.4	-2.24	0.1421	0.3993	Mnd1	meiotic nuclear divisions 1 homolog (S. cerevisiae)	Coding
TC0200005385.mm.1	14.74	15.9	-2.24	0.0129	0.106	Sycp2	synaptonemal complex protein 2; Synthetic construct Mus musculus clone IMAGE:100069462, MGC:199364 synaptonemal complex protein 2 (Sycp2) mRNA, encodes complete protein.	Multiple_Complex
TC1500000857.mm.1	9.17	10.33	-2.24	0.0218	0.1425	Gm23737	predicted gene, 23737 [Source:MGI Symbol;Acc:MGI:5453514]	Small_RNA
TC1400002500.mm.1	9.33	10.49	-2.24	0.7876	0.9079			NonCoding
TC1300001960.mm.1	8.99	10.16	-2.24	0.1555	0.4192	Cenpp	centromere protein P	Multiple_Complex
TC0900003150.mm.1	7.01	8.17	-2.24	0.1558	0.4195			NonCoding
TC0900001175.mm.1	6.76	7.93	-2.24	0.0032	0.0457	Plod2	procollagen lysine, 2-oxoglutarate 5-dioxygenase 2	Multiple_Complex
TC1000003128.mm.1	9.1	10.26	-2.24	0.2946	0.5763	LOC100862107	PREDICTED: uncharacterized LOC100862107 (LOC100862107), miscRNA.	NonCoding
TC0200002199.mm.1	6.4	7.56	-2.24	0.3421	0.6194	8030411F24Rik	RIKEN cDNA 8030411F24 gene	Coding
TC0400000269.mm.1	7.41	8.57	-2.24	0.0073	0.076	Casp8ap2	caspase 8 associated protein 2	Multiple_Complex
TC1100001383.mm.1	12.24	13.41	-2.24	0.0272	0.1627	Gm23507	predicted gene, 23507 [Source:MGI Symbol;Acc:MGI:5453284]	Small_RNA
TC0400000558.mm.1	7.81	8.98	-2.24	0.1186	0.3628	Gm12460	predicted gene 12460 [Source:MGI Symbol;Acc:MGI:3650440]	Pseudogene
TC1100002701.mm.1	5.98	7.14	-2.24	0.1108	0.3504	LOC100861762	PREDICTED: uncharacterized LOC100861762 (LOC100861762), miscRNA.	NonCoding
TC0Y00000151.mm.1	16.17	17.33	-2.24	0.3905	0.657	Gm20736; Gm21258	predicted gene, 20736 (Gm20736), mRNA.; predicted gene, 21258; predicted gene, 20736	Coding
TC0Y00000176.mm.1	16.17	17.33	-2.24	0.3905	0.657	Gm20736	predicted gene, 20736 (Gm20736), mRNA.; predicted gene, 20736	Coding
TC0800002913.mm.1	11.19	12.35	-2.24	0.0731	0.28	Gm25321	predicted gene, 25321 [Source:MGI Symbol;Acc:MGI:5455098]	Small_RNA
TC1200001511.mm.1	9.58	10.74	-2.24	0.0348	0.1862	LOC100862386	PREDICTED: zinc finger protein 700-like (LOC100862386), partial mRNA.	Coding
TC1200000823.mm.1	10.02	11.18	-2.24	0.5109	0.7446	Fcf1	FCF1 small subunit (SSU) processome component homolog (S. cerevisiae)	Multiple_Complex
TC0900001062.mm.1	8.6	9.76	-2.23	0.7824	0.9049	LOC100862063	PREDICTED: uncharacterized LOC100862063 (LOC100862063), miscRNA.	NonCoding
TC0500000576.mm.1	6.53	7.69	-2.23	0.0342	0.1845	Gm6632	predicted pseudogene 6632 [Source:MGI Symbol;Acc:MGI:3644251]	Pseudogene
TC0100000014.mm.1	10.14	11.3	-2.23	0.0181	0.1288	Atp6v1h	ATPase, H+ transporting, lysosomal V1 subunit H	Coding
TC0X00002614.mm.1	13.84	14.99	-2.23	0.3218	0.6016	1700084M14Rik	RIKEN cDNA 1700084M14 gene	Multiple_Complex
TC0900003133.mm.1	4.8	5.96	-2.23	0.0317	0.177	n-R5s90	nuclear encoded rRNA 5S 90 [Source:MGI Symbol;Acc:MGI:4421938]	Ribosomal
TC1700001155.mm.1	7.85	9.01	-2.23	0.0157	0.1194	Gm24475	predicted gene, 24475 [Source:MGI Symbol;Acc:MGI:5454252]	Small_RNA
TC0X00003214.mm.1	10.56	11.72	-2.23	0.4513	0.7023	Gm15143	predicted gene 15143	Pseudogene
TC0200004983.mm.1	10.26	11.42	-2.23	0.0004	0.0115	Rbm39	RNA binding motif protein 39	Multiple_Complex
TC0300001390.mm.1	10.74	11.9	-2.23	0.0879	0.3098	Gm26107	predicted gene, 26107 [Source:MGI Symbol;Acc:MGI:5455884]	Small_RNA
TC0900000975.mm.1	14.43	15.59	-2.23	0.0455	0.2156	Gm23057	predicted gene, 23057 [Source:MGI Symbol;Acc:MGI:5452834]	Small_RNA
TC1800001591.mm.1	9.05	10.21	-2.23	0.4605	0.7086	Gm23119	predicted gene, 23119 [Source:MGI Symbol;Acc:MGI:5452896]	Small_RNA
TC0X00001964.mm.1	13.72	14.87	-2.23	0.2753	0.5581	Gm5934	predicted gene 5934	Coding
TC0400002978.mm.1	4.91	6.07	-2.23	0.0691	0.2718	Scarna8	small Cajal body-specific RNA 8	Small_RNA
TC1700000955.mm.1	9.71	10.87	-2.23	0.0003	0.0101	Gm7334	predicted gene 7334 [Source:MGI Symbol;Acc:MGI:3647393]	Coding
TC1600000802.mm.1	10.09	11.25	-2.23	0.4564	0.7058	1700010K23Rik	RIKEN cDNA 1700010K23 gene	NonCoding
TC1200002394.mm.1	8.78	9.93	-2.23	0.5206	0.7512	Mpc1-ps	mitochondrial pyruvate carrier 1, pseudogene	Pseudogene
TC0X00002539.mm.1	8.23	9.38	-2.23	0.0847	0.3039	4930595M18Rik	RIKEN cDNA 4930595M18 gene	Coding
TC1100000414.mm.1	7.62	8.77	-2.23	0.01	0.0909	Gm12141; Hspd1-ps3	predicted gene 12141; heat shock protein 1 (chaperonin), pseudogene 3 [Source:MGI Symbol;Acc:MGI:3651246]	Pseudogene
TC0300000343.mm.1	15.79	16.95	-2.23	0.0128	0.1054	Gm23511	predicted gene, 23511 [Source:MGI Symbol;Acc:MGI:5453288]	Small_RNA
TC1300001171.mm.1	9.12	10.27	-2.22	0.4189	0.6791	Cenpk	centromere protein K; Synthetic construct Mus musculus clone IMAGE:100015025, MGC:180340 centromere protein K (Cenpk) mRNA, encodes complete protein.; centromere protein K (Cenpk), transcript variant 2, mRNA.; centromere protein K (Cenpk), transcript variant 1, mRNA.	Multiple_Complex
TC0400001008.mm.1	9.16	10.32	-2.22	0.0165	0.1221	Efcab7	EF-hand calcium binding domain 7	Multiple_Complex
TC0X00003215.mm.1	11.94	13.1	-2.22	0.3426	0.6197	Gm5947	predicted pseudogene 5947	Pseudogene
TC1300000898.mm.1	10.34	11.49	-2.22	4.27e-05	0.0027	Mir692-2	microRNA 692-2	Multiple_Complex
TC0X00000577.mm.1	5.91	7.07	-2.22	0.7193	0.8724	4931400O07Rik	RIKEN cDNA 4931400O07 gene	Coding
TC0100003225.mm.1	8.71	9.86	-2.22	0.0772	0.2886	Gm15443	predicted gene 15443 [Source:MGI Symbol;Acc:MGI:3642525]	Multiple_Complex
TC1500002321.mm.1	12.84	13.99	-2.22	0.4637	0.7106	BC048502	cDNA sequence BC048502	Coding
TC1700001625.mm.1	11	12.15	-2.22	0.0334	0.1824	Gm25618	predicted gene, 25618 [Source:MGI Symbol;Acc:MGI:5455395]	Small_RNA
TC0700000961.mm.1	5.76	6.91	-2.22	0.1184	0.3625	Ndn	necdin	Coding
TC0800002830.mm.1	10.04	11.19	-2.22	0.3815	0.6494	Gm5915	predicted pseudogene 5915	Pseudogene
TC0X00003358.mm.1	9.32	10.48	-2.22	0.1014	0.3346	Tmsb4x	thymosin, beta 4, X chromosome	Coding
TC0X00000677.mm.1	6.23	7.38	-2.22	0.0141	0.1122	Xlr4b	X-linked lymphocyte-regulated 4B	Multiple_Complex
TC0X00002540.mm.1	9.74	10.89	-2.22	0.0074	0.0764	Gm8822	predicted gene 8822	Multiple_Complex
TC1600000526.mm.1	8.92	10.07	-2.22	0.0013	0.0263	Iqcb1	IQ calmodulin-binding motif containing 1	Multiple_Complex
TC0400000124.mm.1	9.43	10.58	-2.22	0.3791	0.6475	Gm11836	predicted gene 11836	Pseudogene
TC0800001865.mm.1	9.6	10.75	-2.22	0.2396	0.5221	Rpl30-ps2	ribosomal protein L30, pseudogene 2	Pseudogene
TC0700003043.mm.1	8.41	9.56	-2.22	0.311	0.592	Gm9392	predicted pseudogene 9392	Pseudogene
TC0Y00000246.mm.1	6.93	8.08	-2.22	0.8933	0.9554			NonCoding
TC0X00003213.mm.1	11.61	12.76	-2.22	0.4806	0.7232	4921511M17Rik; Gm10057; Samt1	RIKEN cDNA 4921511M17 gene (4921511M17Rik), mRNA.; predicted gene 10057 (Gm10057), mRNA.; spermatogenesis associated multipass transmembrane protein 1 (Samt1), mRNA.; predicted gene 10057	Coding
TC0Y00000169.mm.1	16.02	17.17	-2.22	0.461	0.7089	LOC100862125	PREDICTED: X-linked lymphocyte-regulated protein PM1-like (LOC100862125), mRNA.	Coding
TC1900000742.mm.1	9.59	10.74	-2.21	0.182	0.4546	Rpl31-ps18	ribosomal protein L31, pseudogene 18	Multiple_Complex
TC1100002595.mm.1	8.61	9.76	-2.21	0.1844	0.4578	Gm12166	predicted gene 12166	Multiple_Complex
TC0600000095.mm.1	12.33	13.48	-2.21	0.5572	0.776	1700016P04Rik	RIKEN cDNA 1700016P04 gene; RIKEN cDNA 1700016P04 gene (1700016P04Rik), non-coding RNA.	NonCoding
TC0X00001091.mm.1	9.27	10.41	-2.21	0.2078	0.4867	Fam46d	family with sequence similarity 46, member D	Coding
TC0600001621.mm.1	12.59	13.74	-2.21	0.4462	0.699	Rpl36a-ps3	ribosomal protein L36A, pseudogene 3	Multiple_Complex
TC1300002706.mm.1	10.84	11.98	-2.21	0.342	0.6193	Ndufs4	NADH dehydrogenase (ubiquinone) Fe-S protein 4	Multiple_Complex
TC1600000120.mm.1	14	15.14	-2.21	0.2405	0.5232	Gm10343	predicted gene 10343 [Source:MGI Symbol;Acc:MGI:3642690]	Pseudogene
TC1000003145.mm.1	10.13	11.28	-2.21	0.2017	0.4793	Myl6	myosin, light polypeptide 6, alkali, smooth muscle and non-muscle	Coding
TC0X00002008.mm.1	16.21	17.35	-2.21	0.2769	0.5601	Gm14527	predicted gene 14527 [Source:MGI Symbol;Acc:MGI:3802087]	Pseudogene
TC0200002492.mm.1	8.16	9.3	-2.21	0.4081	0.6708	LOC100862033	PREDICTED: uncharacterized LOC100862033 (LOC100862033), miscRNA.	NonCoding
TC1400002455.mm.1	12.53	13.67	-2.21	0.1673	0.4355	Gm10132	predicted gene 10132	Coding
TC0Y00000548.mm.1	16.36	17.51	-2.21	0.2811	0.5637	LOC380994; LOC100861808; Sly	similar to Sycp3 like Y-linked, mRNA (cDNA clone MGC:118201 IMAGE:30916067), complete cds.; PREDICTED: X-linked lymphocyte-regulated protein PM1-like (LOC100861808), mRNA.; Sycp3 like Y-linked	Coding
TC0X00000902.mm.1	6.09	7.23	-2.21	0.0242	0.1517	Zxdb	zinc finger, X-linked, duplicated B	Coding
TC1500000486.mm.1	5.89	7.04	-2.21	0.0101	0.0917			NonCoding
TC0900001666.mm.1	8.54	9.69	-2.21	0.0238	0.1501	Sacm1l	SAC1 (suppressor of actin mutations 1, homolog)-like (S. cerevisiae)	Coding
TC0800002672.mm.1	14.71	15.85	-2.21	0.0453	0.2151	Gm26331	predicted gene, 26331 [Source:MGI Symbol;Acc:MGI:5456108]	Small_RNA
TC0Y00000324.mm.1	16.37	17.51	-2.21	0.294	0.5759	Gm20901; LOC380994; Sly	predicted gene, 20901 [Source:MGI Symbol;Acc:MGI:5434257]; similar to Sycp3 like Y-linked, mRNA (cDNA clone MGC:118201 IMAGE:30916067), complete cds.; Sycp3 like Y-linked	Coding
TC1000000109.mm.1	12.81	13.96	-2.21	0.1751	0.4457	Gm10335	predicted gene 10335	Coding
TC0Y00000345.mm.1	16.32	17.47	-2.21	0.2998	0.5807	LOC380994	similar to Sycp3 like Y-linked, mRNA (cDNA clone MGC:118201 IMAGE:30916067), complete cds.	Coding
TC0Y00000559.mm.1	16.32	17.47	-2.21	0.2998	0.5807	LOC380994	similar to Sycp3 like Y-linked, mRNA (cDNA clone MGC:118201 IMAGE:30916067), complete cds.	Coding
TC0Y00000217.mm.1	16.25	17.39	-2.21	0.4028	0.6665	LOC380994; LOC100861881	similar to Sycp3 like Y-linked, mRNA (cDNA clone MGC:118285 IMAGE:6705131), complete cds.; PREDICTED: X-linked lymphocyte-regulated protein PM1-like (LOC100861881), mRNA.	Multiple_Complex
TC0100002283.mm.1	11.28	12.42	-2.21	0.3749	0.6447	Gm5526	predicted pseudogene 5526	Pseudogene
TC0500002389.mm.1	12.65	13.79	-2.21	0.0501	0.2276	Gm22618	predicted gene, 22618 [Source:MGI Symbol;Acc:MGI:5452395]	Small_RNA
TC0X00000793.mm.1	15	16.14	-2.2	0.0925	0.3189	Rps24-ps3	ribosomal protein S24, pseudogene 3	Pseudogene
TC0100002938.mm.1	5.99	7.13	-2.2	0.0334	0.1824	2900060B14Rik	RIKEN cDNA 2900060B14 gene	Multiple_Complex
TC0M00000029.mm.1	8.03	9.17	-2.2	0.1737	0.4438	mt-Tp	mitochondrially encoded tRNA proline [Source:MGI Symbol;Acc:MGI:102478]	tRNA
TC0600003266.mm.1	6.72	7.86	-2.2	0.2795	0.5622	Magohb	mago-nashi homolog B (Drosophila)	Multiple_Complex
TC0800002875.mm.1	13.39	14.53	-2.2	0.0506	0.2289	Rps18-ps3	ribosomal protein S18, pseudogene 3 [Source:MGI Symbol;Acc:MGI:3642474]	Pseudogene
TC0500001676.mm.1	11.54	12.67	-2.2	0.065	0.263	Gm26285	predicted gene, 26285 [Source:MGI Symbol;Acc:MGI:5456062]	Small_RNA
TC0Y00000215.mm.1	16.37	17.51	-2.2	0.3739	0.6439	LOC380994; Gm20736	similar to Sycp3 like Y-linked, mRNA (cDNA clone MGC:118285 IMAGE:6705131), complete cds.; predicted gene, 20736	Coding
TC0Y00000321.mm.1	16.37	17.51	-2.2	0.3739	0.6439	LOC380994; Gm20736	similar to Sycp3 like Y-linked, mRNA (cDNA clone MGC:118285 IMAGE:6705131), complete cds.; predicted gene, 20736	Coding
TC1400000610.mm.1	13.82	14.95	-2.2	0.0648	0.2628	Gm26328	predicted gene, 26328 [Source:MGI Symbol;Acc:MGI:5456105]	Small_RNA
TC0200005399.mm.1	7.56	8.7	-2.2	0.0282	0.1658	Psma7	proteasome (prosome, macropain) subunit, alpha type 7	Multiple_Complex
TC0600002206.mm.1	13.24	14.38	-2.2	0.5646	0.7806	Rn4.5s	4.5S RNA; 4.5S RNA (Rn4.5s), ribosomal RNA.	Ribosomal
TC0Y00000336.mm.1	14.84	15.98	-2.2	0.3622	0.6343	LOC380994	SubName: Full=LOC380994 protein;	Multiple_Complex
TC1100002421.mm.1	9.28	10.41	-2.2	0.1211	0.367	Rps27a	ribosomal protein S27A	Multiple_Complex
TC0Y00000402.mm.1	16.38	17.52	-2.2	0.2989	0.5802	Gm20871	predicted gene, 20871 (Gm20871), non-coding RNA.; Sycp3 like Y-linked pseudogene	Multiple_Complex
TC0Y00000547.mm.1	15.12	16.26	-2.2	0.3876	0.6546	LOC100504642	PREDICTED: X-linked lymphocyte-regulated protein PM1-like, transcript variant 1 (LOC100504642), mRNA.; PREDICTED: X-linked lymphocyte-regulated protein PM1-like, transcript variant 2 (LOC100504642), mRNA.	Multiple_Complex
TC0Y00000292.mm.1	16.1	17.23	-2.2	0.3695	0.6405	LOC100041897	PREDICTED: X-linked lymphocyte-regulated protein PM1-like, transcript variant 1 (LOC100041897), mRNA.	Coding
TC0Y00000293.mm.1	16.1	17.23	-2.2	0.3695	0.6405	LOC100862113	PREDICTED: X-linked lymphocyte-regulated protein PM1-like (LOC100862113), mRNA.	Coding
TC0Y00000409.mm.1	16.38	17.51	-2.19	0.2847	0.5671	LOC380994; LOC100862114	similar to Sycp3 like Y-linked, mRNA (cDNA clone MGC:118201 IMAGE:30916067), complete cds.; PREDICTED: X-linked lymphocyte-regulated protein PM1-like (LOC100862114), mRNA.	Coding
TC0Y00000564.mm.1	16.39	17.52	-2.19	0.3623	0.6343	Gm20736	predicted gene, 20736 (Gm20736), mRNA.	Coding
TC0X00002681.mm.1	6.82	7.95	-2.19	0.2489	0.5318	Gm14803	predicted gene 14803 [Source:MGI Symbol;Acc:MGI:3705495]	Multiple_Complex
TC1100000391.mm.1	7.1	8.23	-2.19	0.1354	0.3894	Gm22127	predicted gene, 22127 [Source:MGI Symbol;Acc:MGI:5451904]	Small_RNA
TC0X00001524.mm.1	5.63	6.76	-2.19	0.0195	0.1341	n-R5s13	nuclear encoded rRNA 5S 13 [Source:MGI Symbol;Acc:MGI:4421747]	Ribosomal
TC0Y00000283.mm.1	16.41	17.55	-2.19	0.3928	0.6591	Gm20736	predicted gene, 20736	Coding
TC0100002742.mm.1	13.58	14.72	-2.19	0.1798	0.4519	Snord82	small nucleolar RNA, C/D box 82	Small_RNA
TC1400001805.mm.1	14.22	15.35	-2.19	0.3845	0.6521	Gm3676	predicted gene 3676	Coding
TC1300002347.mm.1	8.18	9.31	-2.19	0.006	0.0674	Slf1	SMC5-SMC6 complex localization factor 1	Multiple_Complex
TC0700002141.mm.1	13.51	14.64	-2.19	0.1281	0.3782	Gm7363	predicted gene 7363 [Source:MGI Symbol;Acc:MGI:3646407]	Multiple_Complex
TC1500001217.mm.1	6.98	8.11	-2.19	0.1507	0.4125	Sub1	SUB1 homolog (S. cerevisiae)	Multiple_Complex
TC0600002810.mm.1	11	12.13	-2.19	0.4644	0.7111	Gm15531	predicted gene 15531 [Source:MGI Symbol;Acc:MGI:3782979]	Multiple_Complex
TC1400002688.mm.1	12.43	13.56	-2.19	0.0716	0.2771	Gm25670	predicted gene, 25670 [Source:MGI Symbol;Acc:MGI:5455447]	Small_RNA
TC0200003098.mm.1	8.06	9.19	-2.19	0.0043	0.0549	Abi1	abl-interactor 1	Multiple_Complex
TC1400000371.mm.1	12.53	13.66	-2.19	0.1796	0.4518	Gm8290	predicted gene 8290	Pseudogene
TC0900001063.mm.1	7.47	8.59	-2.19	0.2357	0.5181	LOC100862068	PREDICTED: uncharacterized LOC100862068 (LOC100862068), miscRNA.	NonCoding
TC0X00002307.mm.1	8.44	9.56	-2.18	0.0008	0.0182	Atp11c	ATPase, class VI, type 11C	Multiple_Complex
TC1400001856.mm.1	13.61	14.74	-2.18	0.4017	0.6657	1700001F09Rik	RIKEN cDNA 1700001F09 gene	Coding
TC1300001546.mm.1	10.24	11.37	-2.18	0.1138	0.3551	Zfp389	zinc finger protein 389	Multiple_Complex
TC1000001074.mm.1	9.22	10.34	-2.18	0.0045	0.057	Nup37	nucleoporin 37	Multiple_Complex
TC1800000799.mm.1	16.26	17.38	-2.18	0.0148	0.1151	Gm23301	predicted gene, 23301 [Source:MGI Symbol;Acc:MGI:5453078]	Small_RNA
TC0200003109.mm.1	5.4	6.52	-2.18	0.0752	0.2846	Hnmt	histamine N-methyltransferase	Coding
TC0400003309.mm.1	6.48	7.6	-2.18	0.2063	0.4849	Cmpk1	cytidine monophosphate (UMP-CMP) kinase 1	Multiple_Complex
TC0Y00000558.mm.1	15.88	17	-2.18	0.3339	0.6124	Gm20871	Sycp3 like Y-linked pseudogene	Multiple_Complex
TC1600001098.mm.1	5.3	6.42	-2.18	0.2967	0.5782			NonCoding
TC0100003033.mm.1	9.72	10.84	-2.17	0.1367	0.3912	Rpl31-ps9	ribosomal protein L31, pseudogene 9	Pseudogene
TC0600001153.mm.1	13.88	15	-2.17	0.4441	0.6975	Gm6565	predicted gene 6565	Multiple_Complex
TC0100003514.mm.1	10.38	11.5	-2.17	0.0141	0.1122	Gm23523	predicted gene, 23523 [Source:MGI Symbol;Acc:MGI:5453300]	Small_RNA
TC0900002810.mm.1	11.96	13.08	-2.17	0.0474	0.2207	Gm26135	predicted gene, 26135 [Source:MGI Symbol;Acc:MGI:5455912]	Small_RNA
TC0900002398.mm.1	11.01	12.13	-2.17	0.4856	0.7263	Gm20620	predicted gene 20620 [Source:MGI Symbol;Acc:MGI:5313067]	Pseudogene
TC1400000277.mm.1	10.57	11.69	-2.17	0.0051	0.0613	Fam208a	family with sequence similarity 208, member A	Multiple_Complex
TC0X00002371.mm.1	6.42	7.54	-2.17	0.5377	0.7639	Gm4910	predicted pseudogene 4910	Multiple_Complex
TC1400002671.mm.1	4.68	5.79	-2.17	0.036	0.1897	Gm23459	predicted gene, 23459 [Source:MGI Symbol;Acc:MGI:5453236]	Small_RNA
TC1500000351.mm.1	8.19	9.31	-2.17	0.0957	0.3244	Eny2	enhancer of yellow 2 homolog (Drosophila)	Multiple_Complex
TC1000001142.mm.1	12.17	13.29	-2.17	0.0634	0.2597	Gm26239	predicted gene, 26239 [Source:MGI Symbol;Acc:MGI:5456016]	Small_RNA
TC0700001562.mm.1	9.4	10.52	-2.17	0.0355	0.1884			NonCoding
TC0200003299.mm.1	11.18	12.3	-2.17	0.2809	0.5636	Swi5	SWI5 recombination repair homolog (yeast)	Multiple_Complex
TC0200005366.mm.1	9.11	10.23	-2.17	0.7801	0.9037	Gm14404	predicted gene 14404 [Source:MGI Symbol;Acc:MGI:3649814]	Multiple_Complex
TC1400000093.mm.1	14.44	15.56	-2.17	0.1573	0.4215	Rpl21-ps4	ribosomal protein L21, pseudogene 4 [Source:MGI Symbol;Acc:MGI:3646825]	Pseudogene
TC0200005370.mm.1	7.61	8.72	-2.17	0.0315	0.1765	Gm16363	predicted gene 16363 [Source:MGI Symbol;Acc:MGI:3840139]	Multiple_Complex
TC0800002313.mm.1	6.77	7.88	-2.17	0.001	0.0217	Msmo1	methylsterol monoxygenase 1	Multiple_Complex
TC1900000375.mm.1	9.02	10.14	-2.17	0.2321	0.5142			NonCoding
TC1300002220.mm.1	9.94	11.05	-2.17	0.2605	0.5438			NonCoding
TC0200004531.mm.1	13.45	14.56	-2.17	0.1011	0.334	Cops2	COP9 (constitutive photomorphogenic) homolog, subunit 2 (Arabidopsis thaliana); COP9 (constitutive photomorphogenic) homolog, subunit 2 (Arabidopsis thaliana) (Cops2), mRNA.	Multiple_Complex
TC0Y00000208.mm.1	9.36	10.47	-2.16	0.6046	0.8057			NonCoding
TC0600000151.mm.1	6.13	7.25	-2.16	0.2617	0.5448	Lsm8; Naa38	LSM8 homolog, U6 small nuclear RNA associated (S. cerevisiae); N(alpha)-acetyltransferase 38, NatC auxiliary subunit	Multiple_Complex
TC0X00001346.mm.1	10.03	11.14	-2.16	0.1739	0.4441	Gm8019	predicted gene 8019 [Source:MGI Symbol;Acc:MGI:3645628]	Multiple_Complex
TC0900000040.mm.1	12.15	13.26	-2.16	0.2118	0.4914	Dcun1d5	DCN1, defective in cullin neddylation 1, domain containing 5 (S. cerevisiae)	Coding
TC0200004879.mm.1	6.25	7.36	-2.16	0.0001	0.0054	Rad21l	RAD21-like (S. pombe)	Coding
TC0500001089.mm.1	6.54	7.65	-2.16	0.0491	0.225	Gm26387	predicted gene, 26387 [Source:MGI Symbol;Acc:MGI:5456164]	Small_RNA
TC1300000244.mm.1	11.69	12.8	-2.16	0.0231	0.1473	Hist1h4h	histone cluster 1, H4h	Coding
TC1000000915.mm.1	5.81	6.92	-2.16	0.0531	0.2351	Zfp873	zinc finger protein 873	Coding
TC0Y00000094.mm.1	16.21	17.33	-2.16	0.2904	0.5724	Gm21737; LOC380994; Sly	predicted gene, 21737 [Source:MGI Symbol;Acc:MGI:5433901]; similar to Sycp3 like Y-linked, mRNA (cDNA clone MGC:118201 IMAGE:30916067), complete cds.; Sycp3 like Y-linked	Coding
TC0300002924.mm.1	6.52	7.63	-2.16	0.1342	0.3876			NonCoding
TC0X00001048.mm.1	3.77	4.88	-2.16	0.002	0.0339			NonCoding
TC1200000117.mm.1	8.75	9.86	-2.16	0.9875	0.9953			NonCoding
TC1300001467.mm.1	10.59	11.7	-2.16	0.1106	0.3502			NonCoding
TC0Y00000101.mm.1	16.13	17.24	-2.16	0.3091	0.59	Gm21744; LOC380994	predicted gene, 21744 [Source:MGI Symbol;Acc:MGI:5433908]; similar to Sycp3 like Y-linked, mRNA (cDNA clone MGC:118201 IMAGE:30916067), complete cds.	Coding
TC0Y00000205.mm.1	16.25	17.36	-2.16	0.3367	0.6146	LOC100042357	PREDICTED: X-linked lymphocyte-regulated protein PM1-like, transcript variant 1 (LOC100042357), mRNA.	Coding
TC1700002613.mm.1	10.35	11.46	-2.16	0.9229	0.968			NonCoding
TC0Y00000235.mm.1	7.72	8.83	-2.16	0.0098	0.0896	Ddx3y	DEAD (Asp-Glu-Ala-Asp) box polypeptide 3, Y-linked	Multiple_Complex
TC1900001289.mm.1	11.02	12.13	-2.16	0.02	0.1361	Cbwd1	COBW domain containing 1	Multiple_Complex
TC0500001589.mm.1	11.91	13.02	-2.16	0.118	0.3618	Gm22450	predicted gene, 22450 [Source:MGI Symbol;Acc:MGI:5452227]	Small_RNA
TC0100001730.mm.1	6.59	7.7	-2.16	0.0269	0.1615	Cnih4	cornichon homolog 4 (Drosophila)	Multiple_Complex
TC1200000279.mm.1	8.25	9.36	-2.16	0.001	0.0211	Nampt	nicotinamide phosphoribosyltransferase	Coding
TC1300002768.mm.1	10.14	11.25	-2.16	0.0443	0.2125	Zfp934	zinc finger protein 934	Multiple_Complex
TC0100000348.mm.1	5.35	6.46	-2.16	0.0801	0.2943	Gm23974	predicted gene, 23974 [Source:MGI Symbol;Acc:MGI:5453751]	Small_RNA
TC0X00002423.mm.1	6.32	7.43	-2.16	0.0175	0.1265	Xlr4c	X-linked lymphocyte-regulated 4C	Multiple_Complex
TC1000001333.mm.1	6.31	7.42	-2.16	0.1977	0.4747	Tspan8	tetraspanin 8	Coding
TC0100002371.mm.1	6.54	7.65	-2.16	0.1412	0.3978	Tyw5	tRNA-yW synthesizing protein 5; tRNA-yW synthesizing protein 5 (Tyw5), transcript variant 2, mRNA.; tRNA-yW synthesizing protein 5 (Tyw5), transcript variant 3, long non-coding RNA.	Multiple_Complex
TC0800001017.mm.1	7.51	8.62	-2.15	0.4645	0.7111	4930535O05Rik; RP23-433F5.5	RIKEN cDNA 4930535O05 gene [Source:MGI Symbol;Acc:MGI:1922487]; novel transcript	NonCoding
TC0X00001158.mm.1	9.39	10.5	-2.15	0.3	0.5808	Cpxcr1	CPX chromosome region, candidate 1	Coding
TC0900002268.mm.1	6.34	7.45	-2.15	0.0016	0.0295	Pts	6-pyruvoyl-tetrahydropterin synthase	Coding
TC0X00001620.mm.1	6.4	7.51	-2.15	0.023	0.147	Gm23806	predicted gene, 23806 [Source:MGI Symbol;Acc:MGI:5453583]	Ribosomal
TC0500000578.mm.1	5.11	6.22	-2.15	0.006	0.0672			NonCoding
TC0X00002168.mm.1	12.57	13.68	-2.15	0.4523	0.7032	Gm595	predicted gene 595	Coding
TC0200005345.mm.1	7.94	9.04	-2.15	0.184	0.4572	Gm16357	predicted gene 16357	Pseudogene
TC0X00001161.mm.1	7.38	8.48	-2.15	0.2441	0.5272	Gm16373	predicted pseudogene 16373 [Source:MGI Symbol;Acc:MGI:3646158]	Pseudogene
TC0700002572.mm.1	3.64	4.75	-2.15	0.1465	0.4066	Gm4207	predicted gene 4207	Pseudogene
TC0200001295.mm.1	12.89	13.99	-2.15	0.4241	0.6826	Gm13736; Srp9	predicted gene 13736; signal recognition particle 9, mRNA (cDNA clone MGC:103156 IMAGE:5100716), complete cds.	Multiple_Complex
TC0X00003050.mm.1	6.79	7.89	-2.15	0.5024	0.7384	Gm14989	predicted gene 14989	Multiple_Complex
TC0200004179.mm.1	9.07	10.18	-2.15	0.1226	0.369	Itpa-ps1	inosine triphosphatase (nucleoside triphosphate pyrophosphatase) pseudogene 1	Pseudogene
TC0100000397.mm.1	7.85	8.95	-2.15	0.0578	0.2466	Mob4	MOB family member 4, phocein	Multiple_Complex
TC0Y00000161.mm.1	16.21	17.31	-2.15	0.2959	0.5775	Gm21405; Sly	predicted gene, 21405; Sycp3 like Y-linked	Coding
TC0200002127.mm.1	6.77	7.87	-2.15	0.0191	0.1327	Snrpb2	U2 small nuclear ribonucleoprotein B	Multiple_Complex
TC0X00001746.mm.1	4.35	5.45	-2.15	0.4542	0.7043			NonCoding
TC0100001458.mm.1	11.34	12.44	-2.15	0.2248	0.5063	Gm6177	predicted gene 6177	Pseudogene
TC0X00002005.mm.1	16.5	17.6	-2.15	0.2263	0.508	Gm2066	predicted pseudogene 2066 [Source:MGI Symbol;Acc:MGI:3780233]	Pseudogene
TC0Y00000406.mm.1	16.22	17.32	-2.15	0.2963	0.578	Gm20794; LOC380994; Sly	predicted gene, 20794 [Source:MGI Symbol;Acc:MGI:5434150]; similar to Sycp3 like Y-linked, mRNA (cDNA clone MGC:118201 IMAGE:30916067), complete cds.; Sycp3 like Y-linked	Coding
TC0X00000601.mm.1	4.69	5.79	-2.15	0.8569	0.9394	1700036O09Rik; RP23-24K4.1	RIKEN cDNA 1700036O09 gene [Source:MGI Symbol;Acc:MGI:1920512]; novel transcript	NonCoding
TC0900002490.mm.1	6.79	7.9	-2.15	0.055	0.2402	LOC100861862	PREDICTED: uncharacterized LOC100861862 (LOC100861862), miscRNA.	NonCoding
TC0200002785.mm.1	8.57	9.67	-2.14	0.0927	0.3192	Rps21	ribosomal protein S21	Multiple_Complex
TC0200005014.mm.1	15.14	16.24	-2.14	0.0303	0.1725	Mir5111	microRNA 5111 (Mir5111), microRNA.	NonCoding
TC0400001906.mm.1	8.44	9.54	-2.14	0.5748	0.7873			NonCoding
TC0100000170.mm.1	13.94	15.04	-2.14	0.0267	0.161			NonCoding
TC0900000017.mm.1	8.16	9.26	-2.14	0.0691	0.2718	Cwf19l2	CWF19-like 2, cell cycle control (S. pombe)	Multiple_Complex
TC0400000195.mm.1	13.28	14.38	-2.14	0.0983	0.3292	Gm11878	predicted gene 11878 [Source:MGI Symbol;Acc:MGI:3651784]	Multiple_Complex
TC0Y00000091.mm.1	16.43	17.53	-2.14	0.2938	0.5758	Gm20871	predicted gene, 20871 (Gm20871), non-coding RNA.; Sycp3 like Y-linked pseudogene	Multiple_Complex
TC1400001312.mm.1	14.59	15.69	-2.14	0.0409	0.2027	Gm25781	predicted gene, 25781 [Source:MGI Symbol;Acc:MGI:5455558]	Small_RNA
TC1200000092.mm.1	7.24	8.33	-2.14	0.0032	0.046	4930511A02Rik	RIKEN cDNA 4930511A02 gene	NonCoding
TC1500001329.mm.1	6.68	7.78	-2.14	0.0377	0.1939	Snord123	small nucleolar RNA, C/D box 123	Small_RNA
TC0600001530.mm.1	7.45	8.54	-2.14	0.1875	0.4615	Clec2d	C-type lectin domain family 2, member d	Coding
TC0100000973.mm.1	7.47	8.57	-2.14	0.0394	0.1987	Gm24465	predicted gene, 24465 [Source:MGI Symbol;Acc:MGI:5454242]	Small_RNA
TC1200000427.mm.1	11.15	12.24	-2.14	0.0105	0.0933	Arhgap5	Rho GTPase activating protein 5	Multiple_Complex
TC0Y00000106.mm.1	16.44	17.53	-2.14	0.2947	0.5764	LOC380994; LOC100862326	similar to Sycp3 like Y-linked, mRNA (cDNA clone MGC:118201 IMAGE:30916067), complete cds.; PREDICTED: X-linked lymphocyte-regulated protein PM1-like (LOC100862326), mRNA.	Coding
TC0Y00000349.mm.1	16.44	17.53	-2.14	0.2947	0.5764	LOC380994; LOC100861756	similar to Sycp3 like Y-linked, mRNA (cDNA clone MGC:118201 IMAGE:30916067), complete cds.; PREDICTED: X-linked lymphocyte-regulated protein PM1-like (LOC100861756), mRNA.	Coding
TC1400001799.mm.1	13.4	14.49	-2.13	0.4834	0.7248	Gm3486	predicted gene 3486 [Source:MGI Symbol;Acc:MGI:3781663]	Coding
TC0100001247.mm.1	12.43	13.53	-2.13	0.0356	0.1886	Gm4204	predicted gene 4204 [Source:MGI Symbol;Acc:MGI:3782381]	Coding
TC0900003068.mm.1	5.98	7.08	-2.13	0.0411	0.2036	Gm24259	predicted gene, 24259 [Source:MGI Symbol;Acc:MGI:5454036]	Small_RNA
TC0X00000354.mm.1	7.17	8.26	-2.13	0.054	0.2376	Rhox5	reproductive homeobox 5	Coding
TC0700002931.mm.1	8.13	9.22	-2.13	0.0597	0.2511	9830147E19Rik	RIKEN cDNA 9830147E19 gene	Multiple_Complex
TC1400002861.mm.1	13.51	14.6	-2.13	0.4799	0.7229	Gm10377; Gm10375	predicted gene 10377 (Gm10377), mRNA.; predicted gene 10377; predicted gene 10375	Coding
TC0100000956.mm.1	7.51	8.6	-2.13	0.6971	0.8602	4930440C22Rik	RIKEN cDNA 4930440C22 gene; RIKEN cDNA 4930440C22 gene (4930440C22Rik), non-coding RNA.	NonCoding
TC0200001876.mm.1	14.83	15.92	-2.13	0.0304	0.1727	Gm22352	predicted gene, 22352 [Source:MGI Symbol;Acc:MGI:5452129]	Small_RNA
TC0300000646.mm.1	14.83	15.92	-2.13	0.0304	0.1727	Gm24584	predicted gene, 24584 [Source:MGI Symbol;Acc:MGI:5454361]	Small_RNA
TC0600001134.mm.1	14.31	15.4	-2.13	0.098	0.3286	Gm24565	predicted gene, 24565 [Source:MGI Symbol;Acc:MGI:5454342]	Small_RNA
TC1200001508.mm.1	9.4	10.49	-2.13	0.1031	0.3378			NonCoding
TC0300002289.mm.1	13.22	14.31	-2.13	0.2474	0.5304	Gm6570	predicted gene 6570	Pseudogene
TC1100001327.mm.1	10.62	11.71	-2.13	0.1351	0.3887	Gm9378	predicted gene 9378 [Source:MGI Symbol;Acc:MGI:3643021]	Multiple_Complex
TC0X00001213.mm.1	5.32	6.41	-2.13	0.021	0.1392	Cldn34c3; Gm5167	claudin 34C3 [Source:MGI Symbol;Acc:MGI:3645501]; predicted gene 5167	Multiple_Complex
TC1600000798.mm.1	5.67	6.76	-2.13	0.0061	0.068			NonCoding
TC1300000182.mm.1	5.86	6.95	-2.13	0.0046	0.0579	Hist1h4m; Hist1h4n	histone cluster 1, H4m; histone cluster 1, H4n	Coding
TC0Y00000104.mm.1	16.2	17.29	-2.13	0.2995	0.5805	Gm21756; LOC380994	predicted gene, 21756 [Source:MGI Symbol;Acc:MGI:5433920]; similar to Sycp3 like Y-linked, mRNA (cDNA clone MGC:118201 IMAGE:30916067), complete cds.	Coding
TC1400001821.mm.1	13.79	14.88	-2.13	0.4091	0.6717	Gm3573	predicted gene 3573 [Source:MGI Symbol;Acc:MGI:3781750]	Coding
TC1700001189.mm.1	4.82	5.91	-2.13	0.0093	0.0867	n-R5s29	nuclear encoded rRNA 5S 29 [Source:MGI Symbol;Acc:MGI:4421874]	Ribosomal
TC0400000544.mm.1	11.96	13.04	-2.12	0.0271	0.1623	Gm22685	predicted gene, 22685 [Source:MGI Symbol;Acc:MGI:5452462]	Small_RNA
TC0200003506.mm.1	6.96	8.05	-2.12	0.0997	0.3317	Gm13488	predicted gene 13488 [Source:MGI Symbol;Acc:MGI:3651425]	Pseudogene
TC0Y00000347.mm.1	16.21	17.3	-2.12	0.2919	0.5739	Gm21170; Sly	predicted gene, 21170; Sycp3 like Y-linked	Coding
TC0300001372.mm.1	6.96	8.05	-2.12	0.1708	0.4403			NonCoding
TC0X00003211.mm.1	11.59	12.68	-2.12	0.4859	0.7266	4921511M17Rik; Gm10057; Gm15140; Samt1	RIKEN cDNA 4921511M17 gene (4921511M17Rik), mRNA.; predicted gene 10057; predicted gene 15140; spermatogenesis associated multipass transmembrane protein 1 (Samt1), mRNA.; spermatogenesis associated multipass transmembrane protein 1	Coding
TC0X00003212.mm.1	11.59	12.68	-2.12	0.4859	0.7266	4921511M17Rik; Gm10057; Gm15140; Samt1	RIKEN cDNA 4921511M17 gene; predicted gene 10057 (Gm10057), mRNA.; predicted gene 15140 (Gm15140), mRNA.; spermatogenesis associated multipass transmembrane protein 1 (Samt1), mRNA.; predicted gene 10057	Coding
TC0200002526.mm.1	11.6	12.69	-2.12	0.4647	0.7112	Wfdc10	WAP four-disulfide core domain 10	Coding
TC0200001265.mm.1	4.03	5.12	-2.12	0.0139	0.1108			NonCoding
TC0X00000742.mm.1	6.21	7.3	-2.12	0.0228	0.146	Brcc3	BRCA1/BRCA2-containing complex, subunit 3	Multiple_Complex
TC1300001049.mm.1	10.48	11.57	-2.12	0.276	0.5589	Gm6109	PREDICTED: predicted gene 6109 (Gm6109), mRNA.	Coding
TC0500000200.mm.1	7.35	8.43	-2.12	0.0471	0.22	Snord93	small nucleolar RNA, C/D box 93	Multiple_Complex
TC1400001627.mm.1	9.56	10.64	-2.12	0.0017	0.0302	Appl1	adaptor protein, phosphotyrosine interaction, PH domain and leucine zipper containing 1	Multiple_Complex
TC1100003421.mm.1	8.93	10.01	-2.12	0.1975	0.4743	Znhit3	zinc finger, HIT type 3	Multiple_Complex
TC0900002103.mm.1	8.55	9.63	-2.12	0.1432	0.4011	LOC100862227	PREDICTED: uncharacterized LOC100862227, transcript variant 1 (LOC100862227), miscRNA.; PREDICTED: uncharacterized LOC100862227, transcript variant 2 (LOC100862227), miscRNA.; PREDICTED: uncharacterized LOC100862227, transcript variant 3 (LOC100862227), miscRNA.	NonCoding
TC0300000240.mm.1	7.09	8.18	-2.12	0.9362	0.974			NonCoding
TC0900001969.mm.1	6.5	7.58	-2.12	0.0289	0.1679	Gm26435	predicted gene, 26435 [Source:MGI Symbol;Acc:MGI:5456212]	Small_RNA
TC1400002862.mm.1	13.82	14.9	-2.12	0.445	0.6981	Gm10377; Gm10376	predicted gene 10377; predicted gene 10376	Coding
TC0400003452.mm.1	6.89	7.97	-2.12	0.0174	0.1259	Gm23540	predicted gene, 23540 [Source:MGI Symbol;Acc:MGI:5453317]	Small_RNA
TC0Y00000147.mm.1	16.47	17.55	-2.12	0.3379	0.6157	LOC380994; LOC100041698; Gm20736	similar to Sycp3 like Y-linked, mRNA (cDNA clone MGC:118285 IMAGE:6705131), complete cds.; PREDICTED: X-linked lymphocyte-regulated protein PM1-like, transcript variant 1 (LOC100041698), mRNA.; predicted gene, 20736	Coding
TC0Y00000172.mm.1	16.47	17.55	-2.12	0.3379	0.6157	LOC380994; LOC100862297; Gm20736	similar to Sycp3 like Y-linked, mRNA (cDNA clone MGC:118285 IMAGE:6705131), complete cds.; PREDICTED: X-linked lymphocyte-regulated protein PM1-like (LOC100862297), mRNA.; predicted gene, 20736	Coding
TC0Y00000193.mm.1	16.47	17.55	-2.12	0.3379	0.6157	LOC380994; LOC100041345; Gm20736	similar to Sycp3 like Y-linked, mRNA (cDNA clone MGC:118285 IMAGE:6705131), complete cds.; PREDICTED: X-linked lymphocyte-regulated protein PM1-like, transcript variant 1 (LOC100041345), mRNA.; PREDICTED: X-linked lymphocyte-regulated protein PM1-like, transcript variant 2 (LOC100041345), mRNA.; predicted gene, 20736	Coding
TC1000002476.mm.1	8.24	9.32	-2.12	0.0244	0.1524	Gm25794	predicted gene, 25794 [Source:MGI Symbol;Acc:MGI:5455571]	Small_RNA
TC1400000470.mm.1	8.6	9.68	-2.11	0.0252	0.1553	Gm16439	predicted pseudogene 16439 [Source:MGI Symbol;Acc:MGI:3647611]	Pseudogene
TC0200004671.mm.1	12.06	13.14	-2.11	0.0059	0.0666	Pcna	proliferating cell nuclear antigen	Multiple_Complex
TC1300002169.mm.1	5.79	6.87	-2.11	0.0583	0.2478	6720489N17Rik	RIKEN cDNA 6720489N17 gene	Coding
TC0100000436.mm.1	8.21	9.28	-2.11	0.2772	0.5602	Ndufb3	NADH dehydrogenase (ubiquinone) 1 beta subcomplex 3	Coding
TC0400003104.mm.1	8.6	9.68	-2.11	0.0005	0.0131	Gm12696	predicted gene 12696 [Source:MGI Symbol;Acc:MGI:3649288]	Pseudogene
TC1600000195.mm.1	11.89	12.97	-2.11	0.2447	0.5279	Gm5481	PREDICTED: predicted gene 5481 (Gm5481), mRNA.	Coding
TC1100002837.mm.1	8.79	9.87	-2.11	0.0378	0.1941	Hist3h2bb-ps	histone cluster 3, H2bb, pseudogene	Multiple_Complex
TC1100001329.mm.1	7.4	8.48	-2.11	0.16	0.4254	Ska2	spindle and kinetochore associated complex subunit 2	Multiple_Complex
TC0300002524.mm.1	13.38	14.46	-2.11	0.1918	0.4668			Pseudogene
TC0X00001837.mm.1	9.6	10.68	-2.11	0.0205	0.1376	Gm14480	predicted gene 14480 [Source:MGI Symbol;Acc:MGI:3650191]	Multiple_Complex
TC1900000963.mm.1	8.03	9.11	-2.11	0.4805	0.7232	Gm6293	predicted pseudogene 6293	Pseudogene
TC0700003798.mm.1	7.01	8.09	-2.11	0.0039	0.0516	Rps3; Snord15b	ribosomal protein S3; small nucleolar RNA, C/D box 14B	Multiple_Complex
TC1400001174.mm.1	14.04	15.11	-2.11	0.3099	0.5908	Uchl3	ubiquitin carboxyl-terminal esterase L3 (ubiquitin thiolesterase)	Coding
TC1400002699.mm.1	10.18	11.25	-2.11	0.3503	0.6252			NonCoding
TC0700004469.mm.1	7.39	8.47	-2.11	0.1289	0.3794	Gm25798	predicted gene, 25798 [Source:MGI Symbol;Acc:MGI:5455575]	Small_RNA
TC1100002793.mm.1	7.37	8.44	-2.11	0.0256	0.1568	Gm24253	predicted gene, 24253 [Source:MGI Symbol;Acc:MGI:5454030]	Small_RNA
TC0Y00000294.mm.1	16.48	17.55	-2.11	0.344	0.6206	LOC380994; LOC100041966; Gm20736	similar to Sycp3 like Y-linked, mRNA (cDNA clone MGC:118285 IMAGE:6705131), complete cds.; PREDICTED: X-linked lymphocyte-regulated protein PM1-like, transcript variant 1 (LOC100041966), mRNA.; predicted gene, 20736	Coding
TC0Y00000320.mm.1	16.48	17.55	-2.11	0.344	0.6206	LOC380994; LOC100042195; Gm20736	similar to Sycp3 like Y-linked, mRNA (cDNA clone MGC:118285 IMAGE:6705131), complete cds.; PREDICTED: X-linked lymphocyte-regulated protein PM1-like, transcript variant 1 (LOC100042195), mRNA.; predicted gene, 20736	Coding
TC0200000720.mm.1	14.93	16	-2.11	0.0465	0.2182	Gm26127	predicted gene, 26127 [Source:MGI Symbol;Acc:MGI:5455904]	Small_RNA
TC1200002249.mm.1	7.07	8.14	-2.11	0.0641	0.2613	Gm25203	predicted gene, 25203 [Source:MGI Symbol;Acc:MGI:5454980]	Multiple_Complex
TC0Y00000286.mm.1	16.65	17.72	-2.11	0.3503	0.6252	Gm20857; Gm20858	predicted gene, 20857 (Gm20857), non-coding RNA.; predicted gene, 20858 (Gm20858), non-coding RNA.; Sycp3 like Y-linked pseudogene	NonCoding
TC0Y00000192.mm.1	16.44	17.51	-2.11	0.3632	0.6351	Gm20736; Sly	predicted gene, 20736 (Gm20736), mRNA.; Sycp3 like Y-linked, mRNA (cDNA clone MGC:58357 IMAGE:6705850), complete cds.; predicted gene, 20736	Coding
TC0500003192.mm.1	7.89	8.97	-2.11	0.1503	0.412	Gm15547	predicted gene 15547 [Source:MGI Symbol;Acc:MGI:3782996]	Multiple_Complex
TC1100003658.mm.1	8.67	9.74	-2.1	0.1041	0.3396	Fbxo47	F-box protein 47	Multiple_Complex
TC0300002094.mm.1	8.48	9.55	-2.1	0.0009	0.0199	Ssr3	signal sequence receptor, gamma	Multiple_Complex
TC0200004600.mm.1	5.82	6.89	-2.1	0.1638	0.4307	Gm25703	predicted gene, 25703 [Source:MGI Symbol;Acc:MGI:5455480]	Small_RNA
TC0Y00000285.mm.1	16.64	17.72	-2.1	0.3496	0.6249	Gm20857; Gm20858	Sycp3 like Y-linked pseudogene; predicted gene, 20858 (Gm20858), non-coding RNA.	NonCoding
TC0Y00000288.mm.1	16.64	17.72	-2.1	0.3496	0.6249	Gm20857; Gm20858	predicted gene, 20857 (Gm20857), non-coding RNA.; Sycp3 like Y-linked pseudogene	NonCoding
TC0Y00000290.mm.1	16.64	17.72	-2.1	0.3496	0.6249	Gm20857; Gm20858	predicted gene, 20857 (Gm20857), non-coding RNA.; predicted gene, 20858 (Gm20858), non-coding RNA.; Sycp3 like Y-linked pseudogene	NonCoding
TC0Y00000291.mm.1	16.64	17.72	-2.1	0.3496	0.6249	Gm20857; Gm20858	predicted gene, 20857 (Gm20857), non-coding RNA.; predicted gene, 20858 (Gm20858), non-coding RNA.; Sycp3 like Y-linked pseudogene	NonCoding
TC0100001950.mm.1	11.55	12.62	-2.1	0.5868	0.7947	Ppp1r42	protein phosphatase 1, regulatory subunit 42 (Ppp1r42), transcript variant 1, mRNA.; protein phosphatase 1, regulatory subunit 42	Multiple_Complex
TC0900002505.mm.1	5.96	7.03	-2.1	0.0034	0.0478	Gm25313	predicted gene, 25313 [Source:MGI Symbol;Acc:MGI:5455090]	Multiple_Complex
TC0200005355.mm.1	8.77	9.84	-2.1	0.7064	0.8654	Gm14417	predicted gene 14417 [Source:MGI Symbol;Acc:MGI:3652249]	Multiple_Complex
TC0X00003201.mm.1	14.77	15.84	-2.1	0.2316	0.5136	Gm6472	predicted pseudogene 6472 [Source:MGI Symbol;Acc:MGI:3648396]	Pseudogene
TC1100000373.mm.1	10.52	11.59	-2.1	0.059	0.2495	Gm25799	predicted gene, 25799 [Source:MGI Symbol;Acc:MGI:5455576]	Small_RNA
TC0600001903.mm.1	9.81	10.88	-2.1	0.0861	0.3067	Asz1	ankyrin repeat, SAM and basic leucine zipper domain containing 1	Multiple_Complex
TC0100003193.mm.1	6.16	7.23	-2.1	0.0385	0.1961	Cfh	complement component factor h	Multiple_Complex
TC0300003190.mm.1	6.11	7.18	-2.1	0.0941	0.3219	Gm23725	predicted gene, 23725 [Source:MGI Symbol;Acc:MGI:5453502]	Small_RNA
TC0Y00000156.mm.1	16.36	17.43	-2.1	0.3333	0.6119	Gm21858; LOC380994; Gm20736	predicted gene, 21858 [Source:MGI Symbol;Acc:MGI:5434022]; similar to Sycp3 like Y-linked, mRNA (cDNA clone MGC:118285 IMAGE:6705131), complete cds.; predicted gene, 20736	Coding
TC0X00002996.mm.1	9.95	11.02	-2.1	0.0237	0.1499	Gm7855	predicted gene 7855 [Source:MGI Symbol;Acc:MGI:3648232]	Pseudogene
TC0400001262.mm.1	9.09	10.15	-2.1	0.8083	0.9176			NonCoding
TC0600002721.mm.1	13.5	14.57	-2.1	0.3046	0.5855	Rpl21-ps12	ribosomal protein L21, pseudogene 12 [Source:MGI Symbol;Acc:MGI:3648214]	Pseudogene
TC0200004906.mm.1	12.86	13.93	-2.1	0.335	0.6133	Defb19	defensin beta 19	Coding
TC1300000069.mm.1	13.48	14.55	-2.1	0.1685	0.4372	Gm5445	predicted gene 5445	Pseudogene
TC0600002909.mm.1	10.57	11.63	-2.1	0.1105	0.3501	Gm23244	predicted gene, 23244 [Source:MGI Symbol;Acc:MGI:5453021]	Small_RNA
TC0400002637.mm.1	7.64	8.71	-2.09	0.0342	0.1844	Mrpl50	mitochondrial ribosomal protein L50	Coding
TC1000002556.mm.1	8.99	10.05	-2.09	0.0279	0.165	Zfp781	zinc finger protein 781 (Zfp781), mRNA.; zinc finger protein 781	Coding
TC0100000520.mm.1	7.79	8.85	-2.09	0.0036	0.0489	Gm26457	predicted gene, 26457 [Source:MGI Symbol;Acc:MGI:5456234]	Small_RNA
TC0X00001764.mm.1	5.87	6.94	-2.09	0.0004	0.0125	Ccnb3	cyclin B3	Coding
TC1400001862.mm.1	13.56	14.63	-2.09	0.4901	0.7296	Gm10375	predicted gene 10375	Coding
TC0100001740.mm.1	9.44	10.5	-2.09	0.2045	0.4828	Srp9	signal recognition particle 9	Multiple_Complex
TC1500000721.mm.1	9.12	10.19	-2.09	0.0397	0.1995	Rbx1	ring-box 1	Coding
TC0200001723.mm.1	16.87	17.93	-2.09	0.0126	0.1045	Gm25189	predicted gene, 25189 [Source:MGI Symbol;Acc:MGI:5454966]	Small_RNA
TC0200005347.mm.1	8.84	9.91	-2.09	0.2911	0.5732	Gm11009	predicted gene 11009 [Source:MGI Symbol;Acc:MGI:3779227]	Coding
TC1700001276.mm.1	6.16	7.22	-2.09	0.058	0.2471	Gm27178	predicted gene 27178 [Source:MGI Symbol;Acc:MGI:5521021]	Pseudogene
TC0Y00000209.mm.1	16.39	17.46	-2.09	0.3665	0.638	Gm21095; Sly	predicted gene, 21095; Sycp3 like Y-linked, mRNA (cDNA clone MGC:58357 IMAGE:6705850), complete cds.; Sycp3 like Y-linked	Coding
TC0200002734.mm.1	7.46	8.52	-2.09	0.5966	0.8009	Gm6182	predicted gene 6182 [Source:MGI Symbol;Acc:MGI:3779567]	Pseudogene
TC0Y00000216.mm.1	15.99	17.06	-2.09	0.4035	0.667	LOC100039904	PREDICTED: X-linked lymphocyte-regulated protein PM1-like (LOC100039904), mRNA.	Coding
TC0200005334.mm.1	8.08	9.14	-2.09	0.0578	0.2466	Gm14391; Gm6710	predicted gene 14391; predicted gene 6710	Multiple_Complex
TC1000000169.mm.1	13.15	14.21	-2.09	0.3197	0.6	1700020N01Rik	RIKEN cDNA 1700020N01 gene	Multiple_Complex
TC0Y00000152.mm.1	16.53	17.59	-2.09	0.3503	0.6252	Gm20736; Sly	predicted gene, 20736 (Gm20736), mRNA.; Sycp3 like Y-linked, mRNA (cDNA clone MGC:58357 IMAGE:6705850), complete cds.; predicted gene, 20736	Coding
TC0Y00000195.mm.1	16.53	17.59	-2.09	0.3503	0.6252	Gm20736; Sly	predicted gene, 20736 (Gm20736), mRNA.; Sycp3 like Y-linked, mRNA (cDNA clone MGC:58357 IMAGE:6705850), complete cds.; predicted gene, 20736	Coding
TC0Y00000198.mm.1	16.53	17.59	-2.09	0.3503	0.6252	Gm20736; Sly	predicted gene, 20736 (Gm20736), mRNA.; Sycp3 like Y-linked, mRNA (cDNA clone MGC:58357 IMAGE:6705850), complete cds.; predicted gene, 20736	Coding
TC0Y00000206.mm.1	16.53	17.59	-2.09	0.3503	0.6252	Gm20736; Sly	predicted gene, 20736; Sycp3 like Y-linked, mRNA (cDNA clone MGC:58357 IMAGE:6705850), complete cds.	Coding
TC0Y00000284.mm.1	16.53	17.59	-2.09	0.3503	0.6252	Gm20736; Sly	predicted gene, 20736 (Gm20736), mRNA.; Sycp3 like Y-linked; predicted gene, 20736	Coding
TC1000001802.mm.1	4.78	5.84	-2.09	0.1004	0.3329	Abracl	ABRA C-terminal like	Coding
TC0100000343.mm.1	5.79	6.85	-2.09	0.0641	0.2614	Col3a1	collagen, type III, alpha 1	Multiple_Complex
TC0X00000534.mm.1	9.98	11.04	-2.08	1.25e-06	0.0003	Gm364	predicted gene 364	Coding
TC0Y00000149.mm.1	16.57	17.63	-2.08	0.3228	0.6024	LOC100042443	PREDICTED: X-linked lymphocyte-regulated protein PM1-like, transcript variant 1 (LOC100042443), mRNA.	Coding
TC0Y00000174.mm.1	16.57	17.63	-2.08	0.3228	0.6024	LOC100042279	PREDICTED: X-linked lymphocyte-regulated protein PM1-like, transcript variant 1 (LOC100042279), mRNA.	Coding
TC1200000134.mm.1	8.89	9.95	-2.08	0.0032	0.0457	Rock2	Rho-associated coiled-coil containing protein kinase 2; Synthetic construct Mus musculus clone IMAGE:100063319, MGC:191063 Rho-associated coiled-coil containing protein kinase 2 (Rock2) mRNA, encodes complete protein.	Multiple_Complex
TC0X00002529.mm.1	8.65	9.71	-2.08	0.0002	0.0076	Mageb16	melanoma antigen family B, 16	Coding
TC1000002084.mm.1	15.53	16.59	-2.08	0.0394	0.1987	Gm3699	predicted gene 3699 [Source:MGI Symbol;Acc:MGI:3781875]	Pseudogene
TC0900001926.mm.1	15.53	16.59	-2.08	0.0394	0.1987	Gm10180	predicted gene 10180 [Source:MGI Symbol;Acc:MGI:3701608]	Pseudogene
TC0900002292.mm.1	7.26	8.31	-2.08	0.0612	0.2548	Fdx1	ferredoxin 1	Multiple_Complex
TC0900000862.mm.1	9.81	10.87	-2.08	0.0366	0.1905	Ppib	peptidylprolyl isomerase B	Coding
TC0200003532.mm.1	7.08	8.14	-2.08	0.0013	0.0262	Arl5a	ADP-ribosylation factor-like 5A	Multiple_Complex
TC0X00002854.mm.1	6.57	7.63	-2.08	0.042	0.2061	Gm23322	predicted gene, 23322 [Source:MGI Symbol;Acc:MGI:5453099]	Small_RNA
TC0300000575.mm.1	4.74	5.8	-2.08	0.0009	0.0197	Mir15b	microRNA 15b	Precursor_microRNA
TC0400000954.mm.1	10.68	11.74	-2.08	0.163	0.4296	Gm12693	predicted gene 12693	Pseudogene
TC1400001245.mm.1	9.47	10.52	-2.08	0.4713	0.7161			NonCoding
TC1100000271.mm.1	5.8	6.85	-2.08	0.0731	0.28	n-R5s68	nuclear encoded rRNA 5S 68 [Source:MGI Symbol;Acc:MGI:4421913]	Ribosomal
TC1300001564.mm.1	5.7	6.75	-2.08	0.0065	0.0707	Hist1h4n; Hist1h4m	histone cluster 1, H4n (Hist1h4n), mRNA.; histone cluster 1, H4m, mRNA (cDNA clone MGC:144215 IMAGE:40099764), complete cds.; histone cluster 1, H4m, mRNA (cDNA clone MGC:171137 IMAGE:40099768), complete cds.; histone cluster 1, H4n	Coding
TC0Y00000058.mm.1	13.09	14.14	-2.08	0.4125	0.6744	Gm20865	predicted gene, 20865	Coding
TC1800000313.mm.1	9.65	10.7	-2.08	0.0383	0.1957			NonCoding
TC1700001082.mm.1	8.61	9.67	-2.08	0.1507	0.4125	Gm23264	predicted gene, 23264 [Source:MGI Symbol;Acc:MGI:5453041]	Small_RNA
TC0500002971.mm.1	6.06	7.12	-2.08	0.1186	0.3627	5430403G16Rik	RIKEN cDNA 5430403G16 gene [Source:MGI Symbol;Acc:MGI:1924450]	Coding
TC0800001604.mm.1	6.97	8.02	-2.08	0.1274	0.3772	Gm21399	predicted gene, 21399	Multiple_Complex
TC1500001017.mm.1	6.64	7.69	-2.07	0.0049	0.0603	Aqp2	aquaporin 2	Coding
TC0Y00000563.mm.1	16.23	17.28	-2.07	0.3569	0.6297	Gm20736; Sly; Gm20855	predicted gene, 20736 (Gm20736), mRNA.; Sycp3 like Y-linked, mRNA (cDNA clone MGC:58357 IMAGE:6705850), complete cds.; predicted gene, 20855; predicted gene, 20736	Coding
TC0Y00000210.mm.1	16.69	17.74	-2.07	0.3416	0.6192	LOC100862025	PREDICTED: X-linked lymphocyte-regulated protein PM1-like, transcript variant 1 (LOC100862025), mRNA.; PREDICTED: X-linked lymphocyte-regulated protein PM1-like, transcript variant 2 (LOC100862025), mRNA.; PREDICTED: X-linked lymphocyte-regulated protein PM1-like, transcript variant 3 (LOC100862025), mRNA.	Coding
TC0600002848.mm.1	6.36	7.41	-2.07	0.6654	0.8418			NonCoding
TC1000002741.mm.1	12.12	13.17	-2.07	0.0429	0.2089	Gm20091	predicted gene, 20091	Coding
TC0Y00000322.mm.1	16.64	17.69	-2.07	0.3368	0.6147	LOC100042012	PREDICTED: X-linked lymphocyte-regulated protein PM1-like, transcript variant 1 (LOC100042012), mRNA.	Coding
TC1600001957.mm.1	13.71	14.77	-2.07	0.348	0.6238	Rpl21-ps5	ribosomal protein L21, pseudogene 5 [Source:MGI Symbol;Acc:MGI:3647087]	Pseudogene
TC0Y00000203.mm.1	16.36	17.41	-2.07	0.3384	0.6161	Gm20736; Sly; Gm20916	predicted gene, 20736 (Gm20736), mRNA.; Sycp3 like Y-linked, mRNA (cDNA clone MGC:58357 IMAGE:6705850), complete cds.; predicted gene, 20916; predicted gene, 20736	Coding
TC0200001107.mm.1	15.1	16.15	-2.07	0.2299	0.5119	Gm13653	predicted gene 13653	Pseudogene
TC1700001148.mm.1	9.18	10.23	-2.07	0.0186	0.1308	Gm23649	predicted gene, 23649 [Source:MGI Symbol;Acc:MGI:5453426]	Small_RNA
TC0800000094.mm.1	7.8	8.85	-2.07	0.4685	0.714			NonCoding
TC1200001206.mm.1	12.95	14	-2.07	0.0221	0.1436	Gm6988	PREDICTED: predicted gene 6988 (Gm6988), mRNA.	Coding
TC1700000288.mm.1	6.83	7.88	-2.07	0.1988	0.4761			NonCoding
TC0400003330.mm.1	10.38	11.43	-2.07	0.3698	0.6409	Uqcrh	ubiquinol-cytochrome c reductase hinge protein	Multiple_Complex
TC0100002313.mm.1	12.64	13.69	-2.07	0.1678	0.4362	Gm3940	predicted gene 3940	Coding
TC0700000527.mm.1	7.41	8.46	-2.07	0.3266	0.6058	Ppp1r14a	protein phosphatase 1, regulatory (inhibitor) subunit 14A	Coding
TC0300002561.mm.1	12.54	13.59	-2.07	0.011	0.0962	Hsd3b6	hydroxy-delta-5-steroid dehydrogenase, 3 beta- and steroid delta-isomerase 6	Coding
TC1700001238.mm.1	14.34	15.39	-2.07	0.2303	0.5123	Rpl21-ps7	ribosomal protein L21, pseudogene 7 [Source:MGI Symbol;Acc:MGI:3646135]	Pseudogene
TC0Y00000158.mm.1	16.68	17.72	-2.07	0.3517	0.6264	Sly	Sycp3 like Y-linked (Sly), mRNA.; Sycp3 like Y-linked, mRNA (cDNA clone MGC:58357 IMAGE:6705850), complete cds.; Sycp3 like Y-linked	Coding
TC0300000907.mm.1	10.11	11.16	-2.07	0.1955	0.4716	Rps10-ps1	ribosomal protein S10, pseudogene 1 [Source:MGI Symbol;Acc:MGI:3644167]	Pseudogene
TC0200005379.mm.1	8.01	9.05	-2.07	0.6929	0.8578	Gm14428	predicted gene 14428 [Source:MGI Symbol;Acc:MGI:3649514]	Multiple_Complex
TC0200001034.mm.1	14.38	15.43	-2.07	0.2909	0.573	Gm13641	predicted gene 13641 [Source:MGI Symbol;Acc:MGI:3651867]	Pseudogene
TC1400001813.mm.1	13.94	14.99	-2.07	0.423	0.6816	Gm3543	predicted gene 3543 [Source:MGI Symbol;Acc:MGI:3781720]	Coding
TC1400002210.mm.1	6.36	7.41	-2.07	0.0123	0.1027			NonCoding
TC1900000175.mm.1	14.27	15.32	-2.07	0.0091	0.0861	Pcna-ps2	proliferating cell nuclear antigen pseudogene 2 [Source:MGI Symbol;Acc:MGI:97505]	Pseudogene
TC1400001231.mm.1	6.94	7.99	-2.07	0.0514	0.2309	n-R5s50	nuclear encoded rRNA 5S 50 [Source:MGI Symbol;Acc:MGI:4421895]	Ribosomal
TC1800000264.mm.1	14.73	15.77	-2.06	0.0375	0.1932	Gm26378	predicted gene, 26378 [Source:MGI Symbol;Acc:MGI:5456155]	Small_RNA
TC0Y00000213.mm.1	16.64	17.68	-2.06	0.3449	0.6215	LOC380994; LOC100042201; Gm20736	similar to Sycp3 like Y-linked, mRNA (cDNA clone MGC:118285 IMAGE:6705131), complete cds.; PREDICTED: X-linked lymphocyte-regulated protein PM1-like, transcript variant 1 (LOC100042201), mRNA.; PREDICTED: X-linked lymphocyte-regulated protein PM1-like (LOC100042201), mRNA.; predicted gene, 20736	Coding
TC0Y00000197.mm.1	16.49	17.53	-2.06	0.3487	0.6244	Sly	Sycp3 like Y-linked (Sly), mRNA.; Sycp3 like Y-linked, mRNA (cDNA clone MGC:58357 IMAGE:6705850), complete cds.; Sycp3 like Y-linked	Coding
TC0900000372.mm.1	13.6	14.65	-2.06	0.2221	0.5039	Tpt1-ps5	tumor protein, translationally-controlled, pseudogene 5 [Source:MGI Symbol;Acc:MGI:2664999]	Pseudogene
TC0X00001832.mm.1	6.45	7.49	-2.06	0.219	0.5001	Dynlt3	dynein light chain Tctex-type 3	Multiple_Complex
TC0800000039.mm.1	7.11	8.16	-2.06	0.354	0.6276	Zfp958	zinc finger protein 958	Coding
TC0600000946.mm.1	6.85	7.9	-2.06	0.0194	0.1336			NonCoding
TC0700002115.mm.1	15.49	16.53	-2.06	0.041	0.2033	Bc1	brain cytoplasmic RNA 1 (Bc1), non-coding RNA.	NonCoding
TC1300000954.mm.1	5.68	6.73	-2.06	0.0326	0.1798	Gm25383	predicted gene, 25383 [Source:MGI Symbol;Acc:MGI:5455160]	Small_RNA
TC0800000713.mm.1	5.28	6.32	-2.06	0.0712	0.2763	Zfp930	zinc finger protein 930	Multiple_Complex
TC0300002105.mm.1	9.73	10.77	-2.06	0.0126	0.1044	Gm26442	predicted gene, 26442 [Source:MGI Symbol;Acc:MGI:5456219]	Small_RNA
TC0X00002496.mm.1	7.09	8.13	-2.06	0.2874	0.5698	Gm14706	predicted gene 14706 [Source:MGI Symbol;Acc:MGI:3646357]	Multiple_Complex
TC0700002068.mm.1	3.66	4.7	-2.06	0.0076	0.0781	Gm25370	predicted gene, 25370 [Source:MGI Symbol;Acc:MGI:5455147]	Small_RNA
TC0300001104.mm.1	7.13	8.17	-2.06	0.0053	0.0628	Dram2	DNA-damage regulated autophagy modulator 2; VDNA-damage regulated autophagy modulator 2	Multiple_Complex
TC0200005352.mm.1	9.38	10.42	-2.06	0.7621	0.8942	Gm14390	predicted gene 14390 [Source:MGI Symbol;Acc:MGI:3649570]	Multiple_Complex
TC1400000042.mm.1	12.7	13.74	-2.06	0.2254	0.507			NonCoding
TC0100001302.mm.1	7.55	8.59	-2.06	0.001	0.0217	Zbtb41	zinc finger and BTB domain containing 41 homolog	Multiple_Complex
TC1700002713.mm.1	6.76	7.8	-2.06	0.0537	0.2368	Gm23947	predicted gene, 23947 [Source:MGI Symbol;Acc:MGI:5453724]	Small_RNA
TC0400003269.mm.1	8.19	9.23	-2.06	0.0815	0.2969	4930522H14Rik	RIKEN cDNA 4930522H14 gene	Coding
TC0200002529.mm.1	5.7	6.74	-2.06	0.8789	0.9496	Spint5	serine protease inhibitor, Kunitz type 5	Coding
TC0700003775.mm.1	7.38	8.42	-2.05	0.0863	0.3071	Acer3	alkaline ceramidase 3	Multiple_Complex
TC1400001442.mm.1	12.94	13.98	-2.05	0.0007	0.0178	Gm9800	predicted gene 9800 [Source:MGI Symbol;Acc:MGI:3710580]	Pseudogene
TC1100000971.mm.1	11.34	12.37	-2.05	0.1889	0.4634	Rpl23a-ps2	ribosomal protein L23A, pseudogene 2	Multiple_Complex
TC0500000344.mm.1	8.82	9.86	-2.05	0.068	0.2696	Yes1	Yamaguchi sarcoma viral (v-yes) oncogene homolog 1	Multiple_Complex
TC0Y00000024.mm.1	16.27	17.3	-2.05	0.3608	0.6333	LOC100040054	PREDICTED: X-linked lymphocyte-regulated protein PM1-like, transcript variant 1 (LOC100040054), mRNA.	Coding
TC0Y00000157.mm.1	16.44	17.48	-2.05	0.3686	0.6397	Gm21815; LOC380994	predicted gene, 21815 [Source:MGI Symbol;Acc:MGI:5433979]; similar to Sycp3 like Y-linked, mRNA (cDNA clone MGC:118285 IMAGE:6705131), complete cds.	Coding
TC0X00001855.mm.1	13.03	14.07	-2.05	0.2726	0.5552	Rpl30-ps11	ribosomal protein L30, pseudogene 11	Pseudogene
TC0Y00000153.mm.1	16.44	17.48	-2.05	0.3749	0.6447	Gm21894; LOC380994	predicted gene, 21894 [Source:MGI Symbol;Acc:MGI:5434058]; similar to Sycp3 like Y-linked, mRNA (cDNA clone MGC:118285 IMAGE:6705131), complete cds.	Coding
TC0X00003108.mm.1	7.36	8.4	-2.05	0.0012	0.0243	Ammecr1	Alport syndrome, mental retardation, midface hypoplasia and elliptocytosis chromosomal region gene 1; Synthetic construct Mus musculus clone IMAGE:100016345, MGC:184519 Alport syndrome, mental retardation, midface hypoplasia and elliptocytosis chromosomal region gene 1 homolog (human) (Ammecr1) mRNA, encodes complete protein.	Multiple_Complex
TC1700000860.mm.1	14.23	15.27	-2.05	0.2524	0.5352	Gm9104	predicted gene 9104 [Source:MGI Symbol;Acc:MGI:3645365]	Pseudogene
TC0Y00000212.mm.1	16.31	17.35	-2.05	0.3454	0.6219	Sly; Gm21477	Sycp3 like Y-linked, mRNA (cDNA clone MGC:58357 IMAGE:6705850), complete cds.; predicted gene, 21477; Sycp3 like Y-linked	Coding
TC1300001165.mm.1	14.55	15.59	-2.05	0.0279	0.165	Gm24870	predicted gene, 24870 [Source:MGI Symbol;Acc:MGI:5454647]	Small_RNA
TC1100003550.mm.1	11.99	13.02	-2.05	0.0688	0.2712	Gm24856	predicted gene, 24856 [Source:MGI Symbol;Acc:MGI:5454633]	Small_RNA
TC0X00002738.mm.1	6.09	7.12	-2.05	0.0353	0.1877	Rps4x	ribosomal protein S4, X-linked; ribosomal protein S4, X-linked (Rps4x), mRNA.	Multiple_Complex
TC1500002015.mm.1	7.1	8.14	-2.05	0.0541	0.2379			NonCoding
TC0100001943.mm.1	11.81	12.85	-2.05	0.0006	0.0157	Mybl1	myeloblastosis oncogene-like 1	Multiple_Complex
TC0300002944.mm.1	9.65	10.68	-2.05	0.1189	0.3632	Ostc	oligosaccharyltransferase complex subunit	Coding
TC0700002898.mm.1	9.2	10.24	-2.05	0.9516	0.9804			NonCoding
TC0500002632.mm.1	16.05	17.09	-2.05	0.2183	0.4992	Pdcl2	phosducin-like 2	Coding
TC0200004183.mm.1	9.19	10.22	-2.05	0.5464	0.7693	Gm13793; RP23-235D11.1	predicted gene 13793 [Source:MGI Symbol;Acc:MGI:3652243]; putative novel transcript	NonCoding
TC0Y00000173.mm.1	16.33	17.36	-2.05	0.4339	0.6898	LOC100041751	PREDICTED: X-linked lymphocyte-regulated protein PM1-like, transcript variant 2 (LOC100041751), mRNA.	Coding
TC0Y00000194.mm.1	16.48	17.52	-2.05	0.3765	0.6458	Gm20736; Sly	predicted gene, 20736 (Gm20736), mRNA.; Sycp3 like Y-linked, mRNA (cDNA clone MGC:58357 IMAGE:6705850), complete cds.; predicted gene, 20736	Multiple_Complex
TC0100001657.mm.1	10.47	11.5	-2.05	0.0426	0.2082	Gm23805	predicted gene, 23805 [Source:MGI Symbol;Acc:MGI:5453582]	Small_RNA
TC1500000752.mm.1	7.31	8.35	-2.05	0.8779	0.9492	LOC100862061	PREDICTED: uncharacterized LOC100862061 (LOC100862061), miscRNA.	NonCoding
TC1500001529.mm.1	7.76	8.79	-2.05	0.1403	0.3961	Gm5215	predicted gene 5215	Pseudogene
TC1700000190.mm.1	6.75	7.78	-2.05	0.0407	0.2024	BC002059	cDNA sequence BC002059	Multiple_Complex
TC0500000938.mm.1	9.91	10.94	-2.05	0.0001	0.0049	Gm5560	predicted pseudogene 5560	Pseudogene
TC0600001310.mm.1	7.83	8.87	-2.05	0.0447	0.2135			NonCoding
TC0Y00000207.mm.1	16.12	17.15	-2.05	0.3464	0.6227	LOC100861630	PREDICTED: synaptonemal complex protein 3-like (LOC100861630), mRNA.	Coding
TC1300000990.mm.1	8.41	9.44	-2.05	0.0159	0.1196	Ccnh	cyclin H	Multiple_Complex
TC0X00002459.mm.1	12.32	13.35	-2.05	0.0257	0.1572	Gm22351; Gm15365	predicted gene, 22351 [Source:MGI Symbol;Acc:MGI:5452128]; predicted gene 15365 [Source:MGI Symbol;Acc:MGI:3705398]	Multiple_Complex
TC1300001346.mm.1	9.98	11.01	-2.04	0.0117	0.0999	Paip1	polyadenylate binding protein-interacting protein 1	Multiple_Complex
TC0100000790.mm.1	13.01	14.04	-2.04	0.0008	0.0189	Ptma	prothymosin alpha	Coding
TC0400003050.mm.1	14.35	15.39	-2.04	0.4783	0.722	Izumo3	IZUMO family member 3	Coding
TC1500001986.mm.1	8.65	9.68	-2.04	0.023	0.1468	Gm22890	predicted gene, 22890 [Source:MGI Symbol;Acc:MGI:5452667]	Small_RNA
TC1000000029.mm.1	11.38	12.41	-2.04	0.0145	0.1137	Gm22739	predicted gene, 22739 [Source:MGI Symbol;Acc:MGI:5452516]	Small_RNA
TC1300002513.mm.1	13.31	14.34	-2.04	0.6072	0.8073	1700024P04Rik	RIKEN cDNA 1700024P04 gene	Coding
TC0X00000615.mm.1	11.05	12.08	-2.04	0.1541	0.4173	Gm14698	predicted gene 14698	Multiple_Complex
TC0X00002861.mm.1	4.96	5.99	-2.04	0.0585	0.2482	Gm26108	predicted gene, 26108 [Source:MGI Symbol;Acc:MGI:5455885]	Small_RNA
TC0100000081.mm.1	13.81	14.84	-2.04	0.025	0.1546	Rpl5-ps1	ribosomal protein L5, pseudogene 1	Pseudogene
TC0300000007.mm.1	11.12	12.15	-2.04	0.2529	0.5359	Rps24-ps2	ribosomal protein S24, pseudogene 2 [Source:MGI Symbol;Acc:MGI:3649025]	Pseudogene
TC0X00000046.mm.1	15.92	16.95	-2.04	0.0452	0.2146	n-R5s2	nuclear encoded rRNA 5S 2 [Source:MGI Symbol;Acc:MGI:4421736]	Ribosomal
TC0X00000121.mm.1	8.97	9.99	-2.04	0.3383	0.6161	4930557A04Rik	RIKEN cDNA 4930557A04 gene	Coding
TC1600001695.mm.1	12.65	13.68	-2.04	0.0227	0.1456	1700026J12Rik	RIKEN cDNA 1700026J12 gene	NonCoding
TC1300001030.mm.1	7.68	8.71	-2.04	0.7151	0.8698	1700119I11Rik; RP24-73H24.2	RIKEN cDNA 1700119I11 gene [Source:MGI Symbol;Acc:MGI:1925729]; novel protein (1700119I11Rik)	Coding
TC0700003088.mm.1	10.81	11.84	-2.04	0.5612	0.7784	1700015G11Rik	RIKEN cDNA 1700015G11 gene	Multiple_Complex
TC0500000362.mm.1	15.22	16.25	-2.04	0.3615	0.6339	Gm10059	predicted pseudogene 10059	Pseudogene
TC0500003581.mm.1	11.05	12.07	-2.04	0.4984	0.7356	Gm6272	predicted pseudogene 6272	Pseudogene
TC0400000079.mm.1	10.61	11.63	-2.03	0.0541	0.2379	Rps11-ps3	ribosomal protein S11, pseudogene 3	Multiple_Complex
TC0500000511.mm.1	6.02	7.05	-2.03	0.0151	0.1165	Gm19932	predicted gene, 19932 [Source:MGI Symbol;Acc:MGI:5012117]	Multiple_Complex
TC1800001719.mm.1	9.15	10.18	-2.03	0.1107	0.3502	Timm21	tranlocase of inner mitochondrial membrane 21	Coding
TC1000002768.mm.1	11.12	12.15	-2.03	0.2549	0.538			NonCoding
TC0X00001621.mm.1	6.42	7.44	-2.03	0.0101	0.0912	A830080D01Rik	RIKEN cDNA A830080D01 gene	Multiple_Complex
TC0400002802.mm.1	8.09	9.11	-2.03	0.1023	0.3365	Gm11483	predicted gene 11483	Multiple_Complex
TC0Y00000040.mm.1	15.33	16.35	-2.03	0.3742	0.6442			NonCoding
TC0Y00000339.mm.1	14.89	15.92	-2.03	0.3336	0.6122			NonCoding
TC0Y00000154.mm.1	16.46	17.48	-2.03	0.3474	0.6233	Sly; Gm20931	Sycp3 like Y-linked; Sycp3 like Y-linked, mRNA (cDNA clone MGC:58357 IMAGE:6705850), complete cds.; predicted gene, 20931	Coding
TC0200005375.mm.1	8.21	9.23	-2.03	0.3374	0.6153	Gm14429	predicted gene 14429 [Source:MGI Symbol;Acc:MGI:3649510]	Multiple_Complex
TC0700004515.mm.1	5.55	6.57	-2.03	0.0793	0.2928	Ifitm3	interferon induced transmembrane protein 3	Coding
TC1100004261.mm.1	8.22	9.24	-2.03	0.0814	0.2969	Ppp3r1	protein phosphatase 3, regulatory subunit B, alpha isoform (calcineurin B, type I)	Multiple_Complex
TC0700003916.mm.1	8.6	9.62	-2.03	0.9837	0.9939	Dnajc19-ps	DnaJ (Hsp40) homolog, subfamily C, member 19, pseudogene	Multiple_Complex
TC1300001161.mm.1	13.96	14.98	-2.03	0.2426	0.5254	Gm16416	predicted gene 16416 [Source:MGI Symbol;Acc:MGI:3646635]	Pseudogene
TC0Y00000025.mm.1	6.72	7.74	-2.03	0.7408	0.8831			NonCoding
TC0Y00000145.mm.1	16.6	17.62	-2.03	0.3499	0.625	Gm21209	predicted gene, 21209	Coding
TC0Y00000170.mm.1	16.6	17.62	-2.03	0.3499	0.625	Gm21518	predicted gene, 21518	Coding
TC0Y00000190.mm.1	16.6	17.62	-2.03	0.3499	0.625	Gm20888	predicted gene, 20888	Coding
TC0Y00000201.mm.1	16.6	17.62	-2.03	0.3499	0.625	Gm21638	predicted gene, 21638	Coding
TC0Y00000202.mm.1	16.6	17.62	-2.03	0.3499	0.625	Gm21650	predicted gene, 21650	Coding
TC0Y00000367.mm.1	16.6	17.62	-2.03	0.3499	0.625	Gm20923	predicted gene, 20923	Coding
TC0Y00000426.mm.1	16.6	17.62	-2.03	0.3499	0.625	Gm21171	predicted gene, 21171	Coding
TC0Y00000437.mm.1	16.6	17.62	-2.03	0.3499	0.625	Gm20874	predicted gene, 20874	Coding
TC0Y00000438.mm.1	16.6	17.62	-2.03	0.3499	0.625	Gm20937	predicted gene, 20937	Coding
TC0Y00000452.mm.1	16.6	17.62	-2.03	0.3499	0.625	Gm20843	predicted gene, 20843	Coding
TC0400003047.mm.1	13.35	14.36	-2.03	0.1698	0.4391	Gm12669	predicted gene 12669	Multiple_Complex
TC0200002987.mm.1	7.14	8.16	-2.03	0.003	0.0437	Trdmt1	tRNA aspartic acid methyltransferase 1	Multiple_Complex
TC0X00001684.mm.1	5.46	6.48	-2.03	0.0144	0.1132	Trappc2	trafficking protein particle complex 2	Multiple_Complex
TC0800001599.mm.1	9.79	10.8	-2.03	0.0015	0.0279	Itgb1	integrin beta 1 (fibronectin receptor beta)	Multiple_Complex
TC0Y00000236.mm.1	7.72	8.74	-2.02	0.0003	0.0101	Usp9y	ubiquitin specific peptidase 9, Y chromosome	Coding
TC0100000283.mm.1	11.6	12.62	-2.02	0.0557	0.2418	Gm3617	predicted gene 3617 [Source:MGI Symbol;Acc:MGI:3781793]	Pseudogene
TC0600003061.mm.1	8.05	9.07	-2.02	0.5134	0.7466			NonCoding
TC1500001943.mm.1	10.13	11.14	-2.02	0.4223	0.6812	Ndufa6	NADH dehydrogenase (ubiquinone) 1 alpha subcomplex, 6 (B14)	Multiple_Complex
TC0200005329.mm.1	9.19	10.21	-2.02	0.2822	0.5647	Gm14392	predicted gene 14392 [Source:MGI Symbol;Acc:MGI:3649574]; predicted gene 14392	Multiple_Complex
TC1400002703.mm.1	9.99	11.01	-2.02	0.9854	0.9944			NonCoding
TC0700001412.mm.1	9.94	10.96	-2.02	0.5969	0.801	Cox20-ps	COX20 Cox2 chaperone, pseudogene	Multiple_Complex
TC0200001766.mm.1	5.18	6.2	-2.02	0.2697	0.5526	Gm14175	predicted gene 14175 [Source:MGI Symbol;Acc:MGI:3650264]	Multiple_Complex
TC0X00002098.mm.1	6.45	7.47	-2.02	0.7221	0.874	Cypt14	cysteine-rich perinuclear theca 14	Multiple_Complex
TC0300001647.mm.1	6.13	7.15	-2.02	0.0017	0.0312	Snx16	sorting nexin 16; sorting nexin 16 (Snx16), transcript variant 2, mRNA.	Coding
TC1300001928.mm.1	9.36	10.38	-2.02	0.0833	0.3008	Dek	DEK oncogene (DNA binding)	Multiple_Complex
TC0X00000519.mm.1	7.09	8.1	-2.02	2.78e-05	0.002	Ddx26b	DEAD/H (Asp-Glu-Ala-Asp/His) box polypeptide 26B	Multiple_Complex
TC0200005354.mm.1	6.68	7.7	-2.02	0.1032	0.3379	Gm14296	predicted gene 14296	Multiple_Complex
TC0700002459.mm.1	9.34	10.35	-2.02	0.0557	0.2417	Gm24464	predicted gene, 24464 [Source:MGI Symbol;Acc:MGI:5454241]	Small_RNA
TC1500000772.mm.1	9.4	10.41	-2.02	0.1999	0.4773			NonCoding
TC0600003037.mm.1	9.21	10.22	-2.02	0.0723	0.2783	Gm25327	predicted gene, 25327 [Source:MGI Symbol;Acc:MGI:5455104]	Small_RNA
TC0900001232.mm.1	8.4	9.42	-2.02	0.0282	0.1657	Rbp1	retinol binding protein 1, cellular	Coding
TC0300002366.mm.1	13.06	14.07	-2.02	0.3388	0.6164	Rps27rt; Rps27	ribosomal protein S27, retrogene; ribosomal protein S27	Multiple_Complex
TC1300000096.mm.1	9.27	10.28	-2.02	0.0711	0.276	Gm26129	predicted gene, 26129 [Source:MGI Symbol;Acc:MGI:5455906]	Small_RNA
TC1900000726.mm.1	4.67	5.68	-2.01	0.0448	0.2137			NonCoding
TC1500000802.mm.1	11.94	12.95	-2.01	0.1811	0.4534	Gm10923	predicted gene 10923	Coding
TC0300000692.mm.1	11.44	12.45	-2.01	0.8535	0.938			NonCoding
TC1600000210.mm.1	11.44	12.45	-2.01	0.8535	0.938			NonCoding
TC0100003679.mm.1	12.12	13.13	-2.01	0.1104	0.35	Ephx1	epoxide hydrolase 1, microsomal	Coding
TC0X00000850.mm.1	6.86	7.87	-2.01	0.1868	0.4607	Gm8858	predicted gene 8858 [Source:MGI Symbol;Acc:MGI:3648007]	Multiple_Complex
TC0100002103.mm.1	6.97	7.98	-2.01	0.1066	0.3435	n-R5s209	nuclear encoded rRNA 5S 209 [Source:MGI Symbol;Acc:MGI:4422074]	Ribosomal
TC0200002170.mm.1	6.69	7.7	-2.01	0.0346	0.1855	Naa20	N(alpha)-acetyltransferase 20, NatB catalytic subunit	Multiple_Complex
TC0500001571.mm.1	10.91	11.92	-2.01	0.4087	0.6713	Rps29-ps	ribosomal protein S29, pseudogene [Source:MGI Symbol;Acc:MGI:3783200]	Pseudogene
TC0300001883.mm.1	15.66	16.67	-2.01	0.2614	0.5446			Pseudogene
TC0600003232.mm.1	7.43	8.44	-2.01	0.0006	0.0161	Clec12b	C-type lectin domain family 12, member B	Coding
TC0X00003425.mm.1	11.76	12.76	-2.01	0.1576	0.422	Cul4b	cullin 4B	Coding
TC1400001515.mm.1	13.09	14.1	-2.01	0.1829	0.4555			NonCoding
TC0300000941.mm.1	14.8	15.81	-2.01	0.0219	0.1427	Gm24136	predicted gene, 24136 [Source:MGI Symbol;Acc:MGI:5453913]	Small_RNA
TC0500003401.mm.1	8.68	9.69	-2.01	0.3446	0.6211	Gm15607	predicted gene 15607	Pseudogene
TC0100003373.mm.1	12.08	13.09	-2.01	0.3969	0.6619	4930469G21Rik	RIKEN cDNA 4930469G21 gene	Multiple_Complex
TC0900002223.mm.1	6.86	7.87	-2.01	0.0372	0.1922	Gm22805	predicted gene, 22805 [Source:MGI Symbol;Acc:MGI:5452582]	Small_RNA
TC1300001942.mm.1	6.42	7.43	-2.01	1.78e-05	0.0015	Mirlet7f-1	microRNA let7f-1; microRNA let7f-1 (Mirlet7f-1), microRNA.	Multiple_Complex
TC0800002509.mm.1	13.16	14.17	-2.01	0.0387	0.1967	Gm2225	PREDICTED: predicted gene 2225 (Gm2225), miscRNA.	NonCoding
TC1600000708.mm.1	8.33	9.34	-2.01	0.0028	0.0423	Cd47	CD47 antigen (Rh-related antigen, integrin-associated signal transducer)	Multiple_Complex
TC0900002597.mm.1	8.63	9.64	-2.01	0.0475	0.2209	Gm23730	predicted gene, 23730 [Source:MGI Symbol;Acc:MGI:5453507]	Small_RNA
TC0400001481.mm.1	14.77	15.77	-2.01	0.2154	0.4956	Gm12944	predicted gene 12944 [Source:MGI Symbol;Acc:MGI:3650498]	Multiple_Complex
TC0600003170.mm.1	16.13	17.14	-2.01	0.0319	0.1777	Gm7308	predicted pseudogene 7308 [Source:MGI Symbol;Acc:MGI:3644558]	Pseudogene
TC0X00003399.mm.1	6.85	7.86	-2.01	0.0186	0.1311	Sh3bgrl	SH3-binding domain glutamic acid-rich protein like	Multiple_Complex
TC0400002610.mm.1	6.41	7.41	-2.01	0.4023	0.6661	Gm12422	predicted gene 12422 [Source:MGI Symbol;Acc:MGI:3651148]	Multiple_Complex
TC0X00000984.mm.1	14.3	15.3	-2.01	0.1851	0.4585	Tpt1-ps6	tumor protein, translationally-controlled, pseudogene 6	Multiple_Complex
TC1900001250.mm.1	8.24	9.25	-2.01	0.304	0.5849			NonCoding
TC1300000255.mm.1	11.35	12.36	-2.01	0.0019	0.0324	Hist1h2bc	histone cluster 1, H2bc	Coding
TC0400000697.mm.1	11.92	12.93	-2.01	0.1798	0.4519	Gm23148	predicted gene, 23148 [Source:MGI Symbol;Acc:MGI:5452925]	Small_RNA
TC0200002151.mm.1	4.75	5.75	-2.01	0.4426	0.6965	Gm561	predicted gene 561	Coding
TC0700002728.mm.1	14.37	15.37	-2	0.0998	0.3318	Gm23103	predicted gene, 23103 [Source:MGI Symbol;Acc:MGI:5452880]	Small_RNA
TC1900000872.mm.1	9.39	10.39	-2	0.5341	0.7612			NonCoding
TC0800001577.mm.1	6.08	7.09	-2	0.3988	0.6632	Coa6	cytochrome c oxidase assembly factor 6	Coding
TC1300000786.mm.1	10.57	11.58	-2	0.3077	0.5888	Gm3785	PREDICTED: predicted gene 3785 (Gm3785), mRNA.	Coding
TC0X00000492.mm.1	5.41	6.41	-2	0.2856	0.568	Gm6591	predicted gene 6591 [Source:MGI Symbol;Acc:MGI:3645686]	Pseudogene
TC0X00000613.mm.1	7.8	8.8	-2	0.0001	0.0048	Fmr1	fragile X mental retardation syndrome 1	Multiple_Complex
TC1300002624.mm.1	11.16	12.17	-2	0.3661	0.6376	Apoo-ps	apolipoprotein O, pseudogene [Source:MGI Symbol;Acc:MGI:3649039]	Pseudogene
TC0X00002146.mm.1	11.54	12.54	-2	0.1218	0.3681	Gm4987	predicted gene 4987 [Source:MGI Symbol;Acc:MGI:3647751]	Multiple_Complex
TC1200002500.mm.1	10.8	11.8	-2	0.0038	0.0512	Gm6750	PREDICTED: predicted gene 6750 (Gm6750), mRNA.	Coding
TC0800000247.mm.1	10.73	11.73	-2	0.3593	0.632	Gm15312	predicted gene 15312 [Source:MGI Symbol;Acc:MGI:3705692]	Multiple_Complex
TC0200002735.mm.1	6.77	7.77	-2	0.1113	0.3512	2210418O10Rik; Gm17258	RIKEN cDNA 2210418O10 gene [Source:MGI Symbol;Acc:MGI:1924208]; predicted gene, 17258 [Source:MGI Symbol;Acc:MGI:4936892]	Multiple_Complex
TC1700002120.mm.1	9.61	10.61	-2	0.0041	0.0538	Cd2ap	CD2-associated protein	Multiple_Complex
TC0X00000511.mm.1	6.94	7.94	-2	0.5266	0.7554	Gm14638	predicted gene 14638 [Source:MGI Symbol;Acc:MGI:3705825]	Multiple_Complex
TC0400001666.mm.1	10.42	11.42	-2	0.0022	0.0367	Srsf10	serine/arginine-rich splicing factor 10; serine/arginine-rich splicing factor 10 (Srsf10), transcript variant 2, mRNA.; serine/arginine-rich splicing factor 10 (Srsf10), transcript variant 1, mRNA.	Multiple_Complex
TC0X00001559.mm.1	13.12	14.12	-2	0.2423	0.5251	Cypt3	cysteine-rich perinuclear theca 3	Coding
TC1700001099.mm.1	7.3	8.3	-2	0.8041	0.9156			NonCoding
TC1700002352.mm.1	6.21	7.21	-2	0.1853	0.4589	C3	complement component 3	Multiple_Complex
TC1800001737.mm.1	13.68	14.68	-2	0.0046	0.0576	Eif3s6-ps2	eukaryotic translation initiation factor 3, subunit 6, pseudogene 2 [Source:MGI Symbol;Acc:MGI:103204]	Multiple_Complex
TC0200004816.mm.1	12.31	13.31	-2	0.0013	0.0259	Cst3	cystatin C	Multiple_Complex
TC1000002727.mm.1	10.49	11.49	-2	0.1358	0.3899	Mrpl42	mitochondrial ribosomal protein L42	Multiple_Complex
TC1600000321.mm.1	6.41	7.4	-2	0.0089	0.0851			NonCoding
TC0900002963.mm.1	6.9	7.9	-2	0.123	0.3698	n-R5s89	nuclear encoded rRNA 5S 89 [Source:MGI Symbol;Acc:MGI:4421937]	Ribosomal
TC0100000280.mm.1	6.81	7.81	-2	0.0222	0.1436	Pdcl3	phosducin-like 3	Coding
TC0500000470.mm.1	10.77	11.77	-2	0.3755	0.6453	Gm7879; Gm17748	predicted pseudogene 7879 [Source:MGI Symbol;Acc:MGI:3645078]; predicted gene, 17748 [Source:MGI Symbol;Acc:MGI:5009826]	Pseudogene
TC0800002999.mm.1	12.15	13.14	-2	0.0699	0.2735			NonCoding
TC0X00001208.mm.1	7.45	8.45	-2	0.0212	0.1398	Cldn34c2; Gm6604	claudin 34C2 [Source:MGI Symbol;Acc:MGI:3644765]; predicted gene 6604	Coding
TC0400000134.mm.1	10.79	11.78	-2	0.0177	0.1272	Gm24317	predicted gene, 24317 [Source:MGI Symbol;Acc:MGI:5454094]	Small_RNA
TC0900001404.mm.1	12.97	13.97	-2	0.0437	0.211	1700102P08Rik	RIKEN cDNA 1700102P08 gene	Coding
TC1100003684.mm.1	8.5	9.49	-2	0.0274	0.1633	Gm12355	predicted gene 12355 [Source:MGI Symbol;Acc:MGI:3649769]	Coding
TC0300002374.mm.1	5.66	6.66	-2	0.3491	0.6246	S100a1	S100 calcium binding protein A1	Coding
TC0600000152.mm.1	15.51	16.51	-2	0.0729	0.2796	Ankrd7	ankyrin repeat domain 7	Coding
TC1200000524.mm.1	8.93	9.93	-1.99	0.0022	0.0362	Prpf39	PRP39 pre-mRNA processing factor 39 homolog (yeast)	Multiple_Complex
TC0800002121.mm.1	10.41	11.41	-1.99	0.1339	0.3871	Frg1	FSHD region gene 1	Coding
TC0300002788.mm.1	5.62	6.62	-1.99	0.0065	0.0706	Gm19420	PREDICTED: predicted gene, 19420 (Gm19420), miscRNA.	NonCoding
TC1800000945.mm.1	9.22	10.21	-1.99	6.51e-05	0.0036	Kif5b	kinesin family member 5B	Multiple_Complex
TC1800000047.mm.1	7.07	8.07	-1.99	0.0357	0.189	Rab18	RAB18, member RAS oncogene family	Multiple_Complex
TSUnmapped00000017.mm.1	9.35	10.34	-1.99	0.1384	0.3936	2410141K09Rik	RIKEN cDNA 2410141K09 gene	Coding
TC1000001665.mm.1	6.92	7.92	-1.99	0.2966	0.5782			NonCoding
TC0300000011.mm.1	13.52	14.51	-1.99	0.0342	0.1844	n-R5s194	nuclear encoded rRNA 5S 194 [Source:MGI Symbol;Acc:MGI:4422059]	Ribosomal
TC1100000884.mm.1	10.19	11.18	-1.99	0.2186	0.4996	Rpl26; Gm15772	ribosomal protein L26; ribosomal protein L26 pseudogene	Multiple_Complex
TC0100002314.mm.1	7.42	8.41	-1.99	0.0047	0.0583	Gls	glutaminase	Multiple_Complex
TC0100002030.mm.1	12.08	13.07	-1.99	0.0326	0.1798	Gm15795	predicted gene 15795 [Source:MGI Symbol;Acc:MGI:3802035]	Pseudogene
TC1700002692.mm.1	16.18	17.18	-1.99	0.0287	0.1675	Calm2	calmodulin 2	Multiple_Complex
TC0Y00000041.mm.1	13.62	14.61	-1.99	0.4382	0.6931			NonCoding
TC1200001485.mm.1	12.16	13.15	-1.99	0.5332	0.7607	Zfp125	zinc finger protein 125 [Source:MGI Symbol;Acc:MGI:1336211]	Coding
TC1800000794.mm.1	8.72	9.72	-1.99	0.0036	0.0496	Acaa2	acetyl-Coenzyme A acyltransferase 2 (mitochondrial 3-oxoacyl-Coenzyme A thiolase)	Coding
TC1800000917.mm.1	6.06	7.06	-1.99	0.1029	0.3374			NonCoding
TC0800001506.mm.1	5.85	6.84	-1.99	0.0003	0.0105	2810013P06Rik	RIKEN cDNA 2810013P06 gene; RIKEN cDNA 2810013P06 gene (2810013P06Rik), non-coding RNA.	NonCoding
TC0300002185.mm.1	13.04	14.04	-1.99	0.0703	0.2743			NonCoding
TC1300000803.mm.1	9.78	10.78	-1.99	0.1158	0.3586	Gm10324	predicted gene 10324	Coding
TC0500003312.mm.1	9.74	10.74	-1.99	0.104	0.3394	Chchd2	coiled-coil-helix-coiled-coil-helix domain containing 2	Multiple_Complex
TC1200000936.mm.1	3.82	4.81	-1.99	0.0371	0.1921	n-R5s65	nuclear encoded rRNA 5S 65 [Source:MGI Symbol;Acc:MGI:4421910]	Ribosomal
TC0300000281.mm.1	5.74	6.73	-1.99	0.2079	0.4868	Gm12540	predicted gene 12540 [Source:MGI Symbol;Acc:MGI:3651849]	Multiple_Complex
TC0400002221.mm.1	12.98	13.97	-1.99	0.5078	0.7423	Gm11843	predicted gene 11843 [Source:MGI Symbol;Acc:MGI:3651166]	Multiple_Complex
TC0700000020.mm.1	8.8	9.79	-1.99	0.7104	0.8673			NonCoding
TC1300002665.mm.1	14.35	15.34	-1.99	0.1245	0.3722	Gm10736	predicted gene 10736	Pseudogene
TC0100003209.mm.1	5.29	6.28	-1.99	0.0804	0.295	Gm23672	predicted gene, 23672 [Source:MGI Symbol;Acc:MGI:5453449]	Small_RNA
TC0100002567.mm.1	7.39	8.38	-1.99	0.365	0.6368			NonCoding
TC1100004077.mm.1	8.72	9.71	-1.99	0.0437	0.2109	Sumo2; Mir684-1	small ubiquitin-like modifier 2; microRNA 684-1 (Mir684-1), microRNA.; SMT3 suppressor of mif two 3 homolog 2 (yeast); microRNA 684-1	Multiple_Complex
TC1600000973.mm.1	6.36	7.35	-1.99	0.0451	0.2145	Gm9789	predicted gene 9789	Coding
TC0X00001098.mm.1	13.63	14.62	-1.98	0.2643	0.5477	Gm14870	predicted gene 14870 [Source:MGI Symbol;Acc:MGI:3705444]	Pseudogene
TC1300002233.mm.1	12.28	13.26	-1.98	0.0346	0.1856	Gm17404	predicted gene, 17404 [Source:MGI Symbol;Acc:MGI:4937038]	Coding
TC0500003161.mm.1	6.97	7.96	-1.98	0.6642	0.8412			NonCoding
TC1000002553.mm.1	7.7	8.69	-1.98	0.0286	0.1672	Zfp781; Gm3055	zinc finger protein 781; predicted gene 3055	Multiple_Complex
TC0200001063.mm.1	5.87	6.86	-1.98	0.158	0.4226	Hspe1-ps5	heat shock protein 1 (chaperonin 10), pseudogene 5	Pseudogene
TC0200004793.mm.1	7.96	8.95	-1.98	0.4756	0.7197	Gm14115	predicted gene 14115 [Source:MGI Symbol;Acc:MGI:3652261]	Pseudogene
TC0600000943.mm.1	10.8	11.78	-1.98	0.0059	0.0668	Zfp638	zinc finger protein 638	Multiple_Complex
TC1200002421.mm.1	13.55	14.54	-1.98	0.3275	0.6066	2010107E04Rik	RIKEN cDNA 2010107E04 gene	Coding
TC0500002104.mm.1	7.66	8.65	-1.98	0.0621	0.2569	Gm20432	predicted gene 20432 [Source:MGI Symbol;Acc:MGI:5141897]	Multiple_Complex
TC0Y00000144.mm.1	13.78	14.77	-1.98	0.2825	0.565	LOC380994; LOC100038971; Gm21739	SubName: Full=LOC380994 protein;; PREDICTED: X-linked lymphocyte-regulated protein PM1-like, transcript variant 2 (LOC100038971), mRNA.; predicted gene, 21739	Multiple_Complex
TC1300001762.mm.1	6.69	7.68	-1.98	0.0851	0.3046	Serpinb1a	serine (or cysteine) peptidase inhibitor, clade B, member 1a	Coding
TC1300002174.mm.1	7.65	8.64	-1.98	0.0764	0.287	Gm5141	predicted gene 5141	Multiple_Complex
TC0800000239.mm.1	10.84	11.83	-1.98	0.3458	0.6223	Gm15309	predicted gene 15309 [Source:MGI Symbol;Acc:MGI:3705458]	Multiple_Complex
TC0100001311.mm.1	8.33	9.31	-1.98	0.0706	0.275	Gm25457	predicted gene, 25457 [Source:MGI Symbol;Acc:MGI:5455234]	Small_RNA
TC1800000437.mm.1	14.63	15.62	-1.98	0.2397	0.5221	Gm16415	predicted pseudogene 16415 [Source:MGI Symbol;Acc:MGI:3647855]	Pseudogene
TC0X00000856.mm.1	13.22	14.21	-1.98	0.2992	0.5804	Gm8880	predicted gene 8880 [Source:MGI Symbol;Acc:MGI:3648900]	Pseudogene
TC0Y00000358.mm.1	13.21	14.2	-1.98	0.4402	0.6946	Gm20889; Gm20867	predicted gene, 20889; predicted gene, 20867	Coding
TC1_GL456210_random00000002.mm.1	5.33	6.31	-1.98	0.2049	0.4833			NonCoding
TC1100001546.mm.1	7.25	8.24	-1.98	0.0532	0.2356	Psmb3	proteasome (prosome, macropain) subunit, beta type 3	Multiple_Complex
TC0200003125.mm.1	7.51	8.49	-1.98	0.0656	0.2644	Gm25518	predicted gene, 25518 [Source:MGI Symbol;Acc:MGI:5455295]	Small_RNA
TC0600003436.mm.1	15.96	16.95	-1.98	0.0126	0.1045	Gm15720	predicted gene 15720 [Source:MGI Symbol;Acc:MGI:3783164]	Multiple_Complex
TC1500001402.mm.1	13.53	14.52	-1.98	0.2457	0.529	Gm3362	predicted pseudogene 3362	Pseudogene
TC0300002885.mm.1	9.44	10.43	-1.98	0.0256	0.1568			NonCoding
TC1700001789.mm.1	6.65	7.63	-1.98	0.5567	0.7757			NonCoding
TC0700001692.mm.1	6.47	7.45	-1.98	0.2752	0.558	Gm25683	predicted gene, 25683 [Source:MGI Symbol;Acc:MGI:5455460]	Small_RNA
TC1600000309.mm.1	7.61	8.59	-1.98	0.0203	0.137	Gm25810	predicted gene, 25810 [Source:MGI Symbol;Acc:MGI:5455587]	Small_RNA
TC0500001992.mm.1	8.89	9.87	-1.98	0.0314	0.1758	Cd36	CD36 antigen	Multiple_Complex
TC1300001407.mm.1	10.35	11.33	-1.98	0.0053	0.0627	Gm10357	predicted gene 10357	Pseudogene
TC1100002508.mm.1	9.1	10.08	-1.97	0.2475	0.5304	Gm12123	predicted gene 12123	Pseudogene
TC1000000913.mm.1	12.07	13.05	-1.97	0.1559	0.4196	Gm8290	PREDICTED: predicted gene 8290 (Gm8290), mRNA.	Coding
TC0X00003428.mm.1	6.84	7.83	-1.97	0.0853	0.3051	Xlr5c	X-linked lymphocyte-regulated 5C	Coding
TC0100001411.mm.1	12.09	13.07	-1.97	0.4772	0.7211			NonCoding
TC0400003763.mm.1	6.99	7.97	-1.97	0.2797	0.5624	Gm12990	predicted gene 12990 [Source:MGI Symbol;Acc:MGI:3651107]	Pseudogene
TC0100001117.mm.1	5.25	6.23	-1.97	0.0804	0.2949	Gm23370	predicted gene, 23370	Small_RNA
TC1100002153.mm.1	13.7	14.68	-1.97	0.2514	0.534	Gm11966	predicted gene 11966 [Source:MGI Symbol;Acc:MGI:3649988]	Pseudogene
TC1400000486.mm.1	11.21	12.19	-1.97	0.2078	0.4868	Styx	serine/threonine/tyrosine interaction protein	Multiple_Complex
TC1000001624.mm.1	9.35	10.33	-1.97	0.1516	0.4138	Sarnp	SAP domain containing ribonucleoprotein	Coding
TC0200004798.mm.1	11.41	12.39	-1.97	0.0691	0.2718	Gm25516	predicted gene, 25516 [Source:MGI Symbol;Acc:MGI:5455293]	Small_RNA
TC0Y00000300.mm.1	14.09	15.07	-1.97	0.272	0.5546	FJ541100; 1700040F15Rik	adult male testis cDNA, RIKEN full-length enriched library, clone:4932704C20 product:weakly similar to X-LINKED LYMPHOCYTE-REGULATED PROTEIN PM1 [], full insert sequence.; RIKEN cDNA 1700040F15 gene	Multiple_Complex
TC1100003081.mm.1	13.32	14.29	-1.97	0.4513	0.7023	LOC100861682	PREDICTED: uncharacterized LOC100861682, transcript variant 1 (LOC100861682), miscRNA.; PREDICTED: uncharacterized LOC100861682, transcript variant 2 (LOC100861682), miscRNA.	NonCoding
TC0600002807.mm.1	13.21	14.19	-1.97	0.0228	0.146	Gm23510	predicted gene, 23510 [Source:MGI Symbol;Acc:MGI:5453287]	Small_RNA
TC0100000457.mm.1	11.85	12.83	-1.97	0.0219	0.1427	Snord70	small nucleolar RNA, C/D box 70	Small_RNA
TC0Y00000455.mm.1	13.33	14.31	-1.97	0.3814	0.6494	Gm20809; Gm20846	predicted gene, 20809 (Gm20809), mRNA.; predicted gene, 20846; predicted gene, 20809	Coding
TC1500000715.mm.1	7.1	8.07	-1.97	0.134	0.3873	Gm25131	predicted gene, 25131 [Source:MGI Symbol;Acc:MGI:5454908]	Small_RNA
TC0X00002853.mm.1	8.25	9.23	-1.97	0.1522	0.4145	Hmgn5	high-mobility group nucleosome binding domain 5	Coding
TC1500000545.mm.1	8.71	9.69	-1.97	0.0755	0.2852	Gml2	glycosylphosphatidylinositol anchored molecule like 2	Multiple_Complex
TC0Y00000148.mm.1	16.28	17.26	-1.97	0.3547	0.6282	Gm21117	predicted gene, 21117	Coding
TC1200001815.mm.1	14.42	15.4	-1.97	0.1707	0.4402	Rpl21-ps3	ribosomal protein L21, pseudogene 3 [Source:MGI Symbol;Acc:MGI:3646431]	Pseudogene
TC1500000383.mm.1	6.4	7.37	-1.97	0.9768	0.9912			NonCoding
TC1000001251.mm.1	12.42	13.4	-1.97	0.0105	0.0935	Gm25587	predicted gene, 25587 [Source:MGI Symbol;Acc:MGI:5455364]	Small_RNA
TC0Y00000070.mm.1	13.29	14.26	-1.97	0.3974	0.6622	Gm20809	predicted gene, 20809 (Gm20809), mRNA.; predicted gene, 20809	Coding
TC0300002228.mm.1	11.52	12.5	-1.97	0.0183	0.1297	Rbm46	RNA binding motif protein 46	Coding
TC0300001894.mm.1	7.39	8.37	-1.97	0.0162	0.1207	n-R5s195	nuclear encoded rRNA 5S 195 [Source:MGI Symbol;Acc:MGI:4422060]	Ribosomal
TC0400002141.mm.1	9.58	10.55	-1.97	0.0028	0.0422	Impad1	inositol monophosphatase domain containing 1	Multiple_Complex
TC0100000989.mm.1	9.67	10.65	-1.97	0.8006	0.9139	Gm20268	predicted gene, 20268; predicted gene, 20268 (Gm20268), non-coding RNA.	NonCoding
TC0400000177.mm.1	7.93	8.9	-1.97	0.0949	0.3231	Ccnc	cyclin C	Multiple_Complex
TC1300002661.mm.1	12.31	13.28	-1.97	0.007	0.0738	Gpbp1	GC-rich promoter binding protein 1	Multiple_Complex
TC0900002263.mm.1	12.68	13.66	-1.97	6.06e-05	0.0034	Gm5621	predicted gene 5621	Pseudogene
TC1800001104.mm.1	9.3	10.28	-1.97	0.6426	0.8286	Gm7936	predicted pseudogene 7936 [Source:MGI Symbol;Acc:MGI:3646364]	Pseudogene
TC0300003022.mm.1	12.41	13.38	-1.97	0.318	0.5987	Gm16060	predicted pseudogene 16060 [Source:MGI Symbol;Acc:MGI:3783246]	Pseudogene
TC0100000437.mm.1	9.78	10.76	-1.97	0.0534	0.2361	Cbx3-ps7	chromobox 3, pseudogene 7 [Source:MGI Symbol;Acc:MGI:3704187]	Coding
TC1500001460.mm.1	12.83	13.8	-1.97	0.0109	0.0954	Eif3e	eukaryotic translation initiation factor 3, subunit E	Multiple_Complex
TC0500001959.mm.1	9.72	10.7	-1.96	0.0787	0.2914			NonCoding
TC0X00002464.mm.1	6.76	7.73	-1.96	0.0572	0.245	Xlr5e-ps	X-linked lymphocyte-regulated 5E, pseudogene	Pseudogene
TC0700002009.mm.1	5.83	6.8	-1.96	0.743	0.8842	Gm6314	PREDICTED: predicted pseudogene 6314 (Gm6314), mRNA.	Coding
TC0100002708.mm.1	5.66	6.63	-1.96	0.1929	0.4684			NonCoding
TC1600000333.mm.1	8.58	9.55	-1.96	0.1316	0.3837	Gm6630	predicted pseudogene 6630	Pseudogene
TC0400003992.mm.1	8.56	9.53	-1.96	0.3222	0.602	2610305D13Rik	RIKEN cDNA 2610305D13 gene	Multiple_Complex
TC0Y00000420.mm.1	13.27	14.24	-1.96	0.4662	0.7123	Gm21634; Gm20867	predicted gene, 21634; predicted gene, 20867	Coding
TC1400000327.mm.1	9.06	10.03	-1.96	0.0005	0.0142	Capn7	calpain 7	Coding
TC0200005362.mm.1	6.12	7.09	-1.96	0.2618	0.5449	Gm14400	predicted gene 14400 [Source:MGI Symbol;Acc:MGI:3650076]	Pseudogene
TC0900000306.mm.1	10.51	11.48	-1.96	2.46e-05	0.0019	LOC100862175	PREDICTED: uncharacterized LOC100862175 (LOC100862175), miscRNA.	NonCoding
TC1500002215.mm.1	8.8	9.77	-1.96	0.2546	0.5378	Gm5808	predicted gene 5808 [Source:MGI Symbol;Acc:MGI:3648628]	Pseudogene
TC0200002215.mm.1	5.97	6.94	-1.96	0.0362	0.1898	Gm14124	predicted gene 14124	Coding
TC0100000027.mm.1	7.43	8.4	-1.96	0.0039	0.0518	Pcmtd1	protein-L-isoaspartate (D-aspartate) O-methyltransferase domain containing 1	Multiple_Complex
TC0X00002653.mm.1	6.17	7.15	-1.96	0.1877	0.4618	Gm14830	predicted gene 14830 [Source:MGI Symbol;Acc:MGI:3705386]	Pseudogene
TC1600001095.mm.1	7.76	8.73	-1.96	0.0367	0.1908			NonCoding
TC1000001011.mm.1	8.22	9.2	-1.96	0.0029	0.0433	1500009L16Rik	RIKEN cDNA 1500009L16 gene	Multiple_Complex
TC1200000768.mm.1	3.75	4.72	-1.96	0.0821	0.2982	n-R5s62	nuclear encoded rRNA 5S 62 [Source:MGI Symbol;Acc:MGI:4421907]	Ribosomal
TC0100000516.mm.1	7.76	8.73	-1.96	0.4042	0.6676	Rps27-ps1	ribosomal protein S27, pseudogene 1	Multiple_Complex
TC0Y00000211.mm.1	16.79	17.76	-1.96	0.3374	0.6153	LOC100039905	PREDICTED: X-linked lymphocyte-regulated protein PM1-like, transcript variant 1 (LOC100039905), mRNA.	Coding
TC1100000602.mm.1	9.62	10.59	-1.96	0.0792	0.2925	Gm25930	predicted gene, 25930 [Source:MGI Symbol;Acc:MGI:5455707]	Small_RNA
TC1800001011.mm.1	6.62	7.59	-1.96	0.3546	0.6281			NonCoding
TC0400003792.mm.1	6.68	7.65	-1.96	0.0592	0.2499	C1qb	complement component 1, q subcomponent, beta polypeptide	Coding
TC1300002226.mm.1	11.64	12.61	-1.96	0.0441	0.2119	Gm10772	predicted gene 10772 [Source:MGI Symbol;Acc:MGI:3704404]	Coding
TC0600000833.mm.1	6.52	7.49	-1.96	0.3287	0.6077			NonCoding
TC0100002083.mm.1	7.96	8.93	-1.96	0.0333	0.1821	Gm22260	predicted gene, 22260 [Source:MGI Symbol;Acc:MGI:5452037]	Small_RNA
TC0X00000333.mm.1	5.83	6.8	-1.96	0.9001	0.9581	Gm19899	PREDICTED: predicted gene, 19899 (Gm19899), miscRNA.	NonCoding
TC0400002953.mm.1	10.95	11.92	-1.96	0.0068	0.0728	Gm25899	predicted gene, 25899 [Source:MGI Symbol;Acc:MGI:5455676]	Small_RNA
TC1700001690.mm.1	12.34	13.31	-1.96	0.4303	0.6875	Gm8186	predicted gene 8186 [Source:MGI Symbol;Acc:MGI:3643110]	Coding
TC0X00003080.mm.1	11.6	12.57	-1.96	0.1727	0.4426	Gm7091	predicted gene 7091 [Source:MGI Symbol;Acc:MGI:3643894]	Pseudogene
TC0X00003427.mm.1	6.53	7.5	-1.96	0.0825	0.2991	Xlr5a	X-linked lymphocyte-regulated 5A	Coding
TC0500002571.mm.1	14.7	15.66	-1.96	0.0408	0.2026	Gm23712	predicted gene, 23712 [Source:MGI Symbol;Acc:MGI:5453489]	Small_RNA
TC0500002715.mm.1	15.25	16.21	-1.96	0.2165	0.4971	Gm15682	predicted gene 15682	Pseudogene
TC0100002481.mm.1	10.58	11.55	-1.96	0.001	0.0217	Idh1	isocitrate dehydrogenase 1 (NADP+), soluble	Coding
TC0900001759.mm.1	7.04	8.01	-1.96	0.8704	0.9457	4930568E12Rik	RIKEN cDNA 4930568E12 gene; RIKEN cDNA 4930568E12 gene (4930568E12Rik), non-coding RNA.	NonCoding
TC0800000490.mm.1	7.03	8	-1.96	0.0371	0.192			NonCoding
TC0600000586.mm.1	11.61	12.58	-1.95	0.0679	0.2695	Stk31	serine threonine kinase 31	Coding
TC1400002023.mm.1	9.96	10.92	-1.95	0.0033	0.0463	Hnrnpc	heterogeneous nuclear ribonucleoprotein C	Multiple_Complex
TC1600001494.mm.1	7.03	8	-1.95	0.0681	0.2697	Gm15696	predicted gene 15696 [Source:MGI Symbol;Acc:MGI:3783137]	Pseudogene
TC0X00002682.mm.1	12.65	13.62	-1.95	0.2837	0.5661	Gm9059	predicted gene 9059	Multiple_Complex
TC0700003557.mm.1	5.02	5.98	-1.95	0.1518	0.414	Gm16017	predicted gene 16017 [Source:MGI Symbol;Acc:MGI:3802069]	Multiple_Complex
TC0900002600.mm.1	4.17	5.14	-1.95	0.2592	0.5426	LOC100861959	PREDICTED: uncharacterized LOC100861959 (LOC100861959), miscRNA.	NonCoding
TC0900002671.mm.1	13.42	14.39	-1.95	0.0353	0.1876	Gm9719	predicted gene 9719 [Source:MGI Symbol;Acc:MGI:3780128]	Multiple_Complex
TC0700002099.mm.1	5.55	6.52	-1.95	0.7458	0.8858	Gm15579; AC068006.3	predicted gene 15579 [Source:MGI Symbol;Acc:MGI:3783027]; putative novel transcript	NonCoding
TC1000000908.mm.1	8.9	9.87	-1.95	0.2568	0.5399	Zfp433	zinc finger protein 433; RIKEN cDNA 1700123A16 gene	Coding
TC0200003765.mm.1	8.9	9.86	-1.95	0.1495	0.4111	Atp5g3	ATP synthase, H+ transporting, mitochondrial F0 complex, subunit C3 (subunit 9)	Multiple_Complex
TC0X00001009.mm.1	5.9	6.86	-1.95	0.1831	0.4558	1700018G05Rik	RIKEN cDNA 1700018G05 gene; RIKEN cDNA 1700018G05 gene (1700018G05Rik), non-coding RNA.	NonCoding
TC1100001305.mm.1	7.79	8.75	-1.95	0.3344	0.6128	Gm11443	predicted gene 11443 [Source:MGI Symbol;Acc:MGI:3651160]	Multiple_Complex
TC0300001690.mm.1	17.08	18.04	-1.95	0.0109	0.0955	Gm23686	predicted gene, 23686 [Source:MGI Symbol;Acc:MGI:5453463]	Small_RNA
TC0Y00000341.mm.1	14.17	15.14	-1.95	0.2996	0.5806	Gm21739; LOC380994	predicted gene, 21739 [Source:MGI Symbol;Acc:MGI:5433903]; SubName: Full=LOC380994 protein;; predicted gene, 21739	Multiple_Complex
TC0400004010.mm.1	11.9	12.86	-1.95	0.1323	0.3847	Gm13202	predicted gene 13202	Pseudogene
TC1000002552.mm.1	12.05	13.01	-1.95	0.1983	0.4756	Gm8112	predicted gene 8112	Pseudogene
TC1000002557.mm.1	12.05	13.01	-1.95	0.1983	0.4756	Gm8158	PREDICTED: predicted gene 8158 (Gm8158), mRNA.	Coding
TC1300002228.mm.1	9.75	10.71	-1.95	0.2431	0.5258	Zfp640	zinc finger protein 640 [Source:MGI Symbol;Acc:MGI:2678025]; zinc finger protein 640	Multiple_Complex
TC0100002709.mm.1	4.7	5.66	-1.95	0.5143	0.7473			NonCoding
TC0500002972.mm.1	6.46	7.42	-1.95	0.407	0.6698	4930522L14Rik	RIKEN cDNA 4930522L14 gene	Multiple_Complex
TC0700001666.mm.1	9.78	10.75	-1.95	0.0189	0.1318	Far1	fatty acyl CoA reductase 1	Multiple_Complex
TC1100001194.mm.1	9.06	10.02	-1.95	0.0088	0.0842	Suz12	suppressor of zeste 12 homolog (Drosophila)	Multiple_Complex
TC0400003803.mm.1	8.61	9.57	-1.95	0.0017	0.0301	Cdc42	cell division cycle 42	Multiple_Complex
TC0X00000518.mm.1	8.88	9.85	-1.95	0.3382	0.616	Gm2174	predicted gene 2174 [Source:MGI Symbol;Acc:MGI:3780344]	Coding
TC1300000870.mm.1	6.25	7.21	-1.95	0.7867	0.9074			NonCoding
TC0X00002026.mm.1	8.03	8.99	-1.95	0.087	0.3083	Gm2892	predicted pseudogene 2892 [Source:MGI Symbol;Acc:MGI:3781070]	Pseudogene
TC0700000695.mm.1	8.15	9.12	-1.95	0.1061	0.3426	Gm22638	predicted gene, 22638 [Source:MGI Symbol;Acc:MGI:5452415]	Small_RNA
TC0400001522.mm.1	6.86	7.82	-1.95	0.0464	0.218	Gm24621	predicted gene, 24621 [Source:MGI Symbol;Acc:MGI:5454398]	Small_RNA
TC1100001503.mm.1	14.49	15.45	-1.95	0.0308	0.174	Gm11531	predicted gene 11531 [Source:MGI Symbol;Acc:MGI:3650260]	Pseudogene
TC0X00000727.mm.1	8.71	9.67	-1.95	0.057	0.2446	Spin2-ps3	spindlin family, member 2, pseudogene 3	Pseudogene
TC0X00002467.mm.1	8.71	9.67	-1.95	0.057	0.2446	Spin2-ps4	spindlin family, member 2, pseudogene 4	Pseudogene
TC0100002848.mm.1	12.33	13.29	-1.95	0.0515	0.2312	Gm20207	PREDICTED: predicted gene, 20207 (Gm20207), miscRNA.	NonCoding
TC0300003247.mm.1	8.47	9.43	-1.95	0.0713	0.2765	Amy1	amylase 1, salivary	Multiple_Complex
TC0Y00000168.mm.1	13.41	14.37	-1.95	0.2733	0.5559	LOC380994; LOC100862210; Gm21739	SubName: Full=LOC380994 protein;; PREDICTED: X-linked lymphocyte-regulated protein PM1-like (LOC100862210), mRNA.; predicted gene, 21739	Multiple_Complex
TC0200000072.mm.1	11.36	12.32	-1.94	0.4456	0.6986	1700061F12Rik	RIKEN cDNA 1700061F12 gene	NonCoding
TC1400000602.mm.1	12.5	13.46	-1.94	0.01	0.0909	Snord58b	small nucleolar RNA, C/D box 58B (Snord58b), small nucleolar RNA.; small nucleolar RNA, C/D box 58B	Small_RNA
TC1200000308.mm.1	10.9	11.86	-1.94	0.0658	0.2648	Gm26071	predicted gene, 26071 [Source:MGI Symbol;Acc:MGI:5455848]	Small_RNA
TC1300000250.mm.1	9.69	10.64	-1.94	0.0006	0.016	Hist1h4d	histone cluster 1, H4d; Synthetic construct Mus musculus clone IMAGE:100062062, MGC:190341 histone cluster 1, H4d (Hist1h4d) mRNA, encodes complete protein.	Coding
TC1700001988.mm.1	9.14	10.1	-1.94	0.0646	0.2624	Gm9840	predicted gene 9840	Pseudogene
TC1700001478.mm.1	14.05	15.01	-1.94	0.2269	0.5086	Gm3355	predicted gene 3355 [Source:MGI Symbol;Acc:MGI:3781533]	Pseudogene
TC1000000478.mm.1	9.29	10.25	-1.94	0.7918	0.9097	Gm19395	predicted gene, 19395; predicted gene, 19395 (Gm19395), non-coding RNA.	NonCoding
TC0X00003053.mm.1	12.81	13.77	-1.94	0.0747	0.2837	Gm22057	predicted gene, 22057 [Source:MGI Symbol;Acc:MGI:5451834]	Small_RNA
TC1300001479.mm.1	5.49	6.45	-1.94	0.0877	0.3094	Mrpl32	mitochondrial ribosomal protein L32	Multiple_Complex
TC1400000926.mm.1	5	5.95	-1.94	0.0287	0.1673	Gm26225	predicted gene, 26225 [Source:MGI Symbol;Acc:MGI:5456002]	Small_RNA
TC0700002814.mm.1	7.97	8.93	-1.94	0.5102	0.744	Scgb2b22-ps	secretoglobin, family 2B, member 22, pseudogene [Source:MGI Symbol;Acc:MGI:3649641]	Multiple_Complex
TC1700002305.mm.1	14.67	15.63	-1.94	0.1903	0.4649	Rpl21-ps6	ribosomal protein L21, pseudogene 6 [Source:MGI Symbol;Acc:MGI:3643554]	Pseudogene
TC1100003946.mm.1	10.48	11.44	-1.94	0.0205	0.1375	Rps12-ps26	ribosomal protein S12, pseudogene 26 [Source:MGI Symbol;Acc:MGI:3713332]	Multiple_Complex
TC1400001146.mm.1	4.37	5.33	-1.94	0.1687	0.4374	Gm25133	predicted gene, 25133 [Source:MGI Symbol;Acc:MGI:5454910]	Small_RNA
TC0Y00000238.mm.1	7.74	8.7	-1.94	0.0379	0.1943	Zfy2	zinc finger protein 2, Y-linked; Synthetic construct Mus musculus clone IMAGE:100062191, MGC:190404 zinc finger protein 2, Y linked (Zfy2) mRNA, encodes complete protein.; zinc finger protein 2, Y linked	Coding
TC0Y00000379.mm.1	12.41	13.37	-1.94	0.5657	0.7815	Gm20852; Gm21302	predicted gene, 20852; predicted gene, 21302	Coding
TC0Y00000388.mm.1	12.41	13.37	-1.94	0.5657	0.7815	Ssty2; Gm21340	spermiogenesis specific transcript on the Y 2, mRNA (cDNA clone MGC:107175 IMAGE:6774426), complete cds.; predicted gene, 21340	Coding
TC0Y00000433.mm.1	12.41	13.37	-1.94	0.5657	0.7815	Gm20852; Ssty2	predicted gene, 20852; spermiogenesis specific transcript on the Y 2, mRNA (cDNA clone MGC:107175 IMAGE:6774426), complete cds.	Coding
TC0500003316.mm.1	12.91	13.87	-1.94	0.1885	0.4629	Gm15921	predicted gene 15921 [Source:MGI Symbol;Acc:MGI:3801933]	Pseudogene
TC1000002554.mm.1	12.24	13.2	-1.94	0.2096	0.4887	Gm8264	PREDICTED: predicted gene 8264 (Gm8264), mRNA.	Coding
TC1000002555.mm.1	12.24	13.2	-1.94	0.2096	0.4887	Gm8137	PREDICTED: predicted gene 8137 (Gm8137), mRNA.	Coding
TC0200003688.mm.1	14.79	15.75	-1.94	0.2639	0.5473	Gm13604	predicted gene 13604 [Source:MGI Symbol;Acc:MGI:3652203]	Pseudogene
TC0300000041.mm.1	13.77	14.73	-1.94	0.0594	0.2504	Gm24614	predicted gene, 24614 [Source:MGI Symbol;Acc:MGI:5454391]	Small_RNA
TC0400002257.mm.1	8.83	9.78	-1.94	0.3406	0.618	Gm11849	predicted gene 11849 [Source:MGI Symbol;Acc:MGI:3652012]	Multiple_Complex
TC0400004026.mm.1	10.71	11.66	-1.94	0.0121	0.1021	Tardbp	TAR DNA binding protein	Multiple_Complex
TC1200001718.mm.1	7.98	8.93	-1.94	0.0184	0.1301			NonCoding
TC0Y00000115.mm.1	13.55	14.51	-1.94	0.4579	0.7068	Gm20798; Gm20867; Gm20809	predicted gene, 20798; predicted gene, 20867; predicted gene, 20809	Coding
TC0800002456.mm.1	9.33	10.28	-1.94	0.0146	0.1144	Gm10282	predicted pseudogene 10282 [Source:MGI Symbol;Acc:MGI:3704312]	Pseudogene
TC0X00001254.mm.1	9.06	10.02	-1.94	0.0138	0.1104	Diaph2	diaphanous related formin 2	Multiple_Complex
TC0X00002108.mm.1	8.45	9.4	-1.94	0.0028	0.0426	Thoc2	THO complex 2	Multiple_Complex
TC0500003053.mm.1	5.57	6.52	-1.94	0.0789	0.2916	Gm22056	predicted gene, 22056 [Source:MGI Symbol;Acc:MGI:5451833]	Small_RNA
TC0Y00000319.mm.1	16.64	17.6	-1.94	0.3125	0.5934	Gm20896	predicted gene, 20896	Coding
TC1200002490.mm.1	5.9	6.86	-1.94	0.0431	0.2095			NonCoding
TC0200003440.mm.1	11.76	12.71	-1.94	0.0754	0.285	Ppp6c	protein phosphatase 6, catalytic subunit	Multiple_Complex
TC0600000026.mm.1	8.35	9.3	-1.94	0.1096	0.3489			NonCoding
TC0600000898.mm.1	12.81	13.76	-1.94	0.0519	0.2323	Gm26264	predicted gene, 26264 [Source:MGI Symbol;Acc:MGI:5456041]	Small_RNA
TC0200001644.mm.1	5.03	5.99	-1.94	0.0766	0.2875	Olfr1283	olfactory receptor 1283	Coding
TC0Y00000352.mm.1	13.59	14.54	-1.94	0.4626	0.71	Gm21308; Gm20816	predicted gene, 21308; predicted gene, 20816	Coding
TC0Y00000412.mm.1	13.59	14.54	-1.94	0.4626	0.71	Gm20803; Gm20816	predicted gene, 20803; predicted gene, 20816	Coding
TC0Y00000443.mm.1	13.59	14.54	-1.94	0.4626	0.71	Gm21672; Gm20816	predicted gene, 21672; predicted gene, 20816	Coding
TC0Y00000480.mm.1	13.59	14.54	-1.94	0.4626	0.71	Gm20867; Gm20816	predicted gene, 20867; predicted gene, 20816	Coding
TC0600000264.mm.1	6.93	7.89	-1.94	0.0169	0.124	n-R5s161	nuclear encoded rRNA 5S 161 [Source:MGI Symbol;Acc:MGI:4422025]	Ribosomal
TC1900000378.mm.1	16.21	17.16	-1.94	0.149	0.4104	Gm9493	predicted gene 9493 [Source:MGI Symbol;Acc:MGI:3779903]	Coding
TC0100000594.mm.1	13.8	14.75	-1.94	0.2314	0.5135	Gm5528	predicted gene 5528	Pseudogene
TC1000001941.mm.1	5.9	6.85	-1.94	0.2094	0.4885	Cenpw	centromere protein W	Coding
TC1400002011.mm.1	12.91	13.87	-1.94	0.5886	0.7958	Gm4181	predicted gene 4181 [Source:MGI Symbol;Acc:MGI:3782357]	Coding
TC0100002859.mm.1	12.71	13.66	-1.94	0.0011	0.0223	Slco6c1	solute carrier organic anion transporter family, member 6c1	Coding
TC0700000741.mm.1	7.38	8.34	-1.93	0.3061	0.587	Gm19246	predicted gene, 19246 [Source:MGI Symbol;Acc:MGI:5011431]	Multiple_Complex
TC0X00002424.mm.1	5.55	6.5	-1.93	0.0041	0.0536	Xlr3c	X-linked lymphocyte-regulated 3C; Synthetic construct Mus musculus clone IMAGE:100066240, MGC:195377 X-linked lymphocyte-regulated 3C (Xlr3c) mRNA, encodes complete protein.	Coding
TC0600000004.mm.1	7.84	8.79	-1.93	0.0463	0.2176	Vps50	VPS50 EARP/GARPII complex subunit	Multiple_Complex
TC0Y00000542.mm.1	4.74	5.69	-1.93	0.5837	0.7928			NonCoding
TC0900002737.mm.1	14.05	15	-1.93	0.3419	0.6193	Cox7a2	cytochrome c oxidase subunit VIIa 2	Coding
TC0300000102.mm.1	9.22	10.17	-1.93	0.0016	0.0291	Ythdf3	YTH domain family 3	Multiple_Complex
TC0200002204.mm.1	7.79	8.75	-1.93	0.078	0.2901	Gm19595	PREDICTED: predicted gene, 19595 (Gm19595), miscRNA.	NonCoding
TC0Y00000165.mm.1	13.82	14.77	-1.93	0.3003	0.581	1700040F15Rik; Gm21739	RIKEN cDNA 1700040F15 gene; predicted gene, 21739	Multiple_Complex
TC0Y00000297.mm.1	13.82	14.77	-1.93	0.3003	0.581	Gm21679; Gm21739	predicted gene, 21679; predicted gene, 21739	Coding
TC0Y00000314.mm.1	13.82	14.77	-1.93	0.3003	0.581	Gm20838; Gm21739	predicted gene, 20838; predicted gene, 21739	Multiple_Complex
TC1600000180.mm.1	15.74	16.69	-1.93	0.0134	0.1085	Gm23116	predicted gene, 23116 [Source:MGI Symbol;Acc:MGI:5452893]	Small_RNA
TC0200002728.mm.1	7.84	8.79	-1.93	0.994	0.9978	Gm2020	predicted gene 2020 [Source:MGI Symbol;Acc:MGI:3780189]	Multiple_Complex
TC1800000969.mm.1	10.94	11.89	-1.93	0.0145	0.1141	Rock1	Rho-associated coiled-coil containing protein kinase 1; Synthetic construct Mus musculus clone IMAGE:100062871, MGC:190980 Rho-associated coiled-coil containing protein kinase 1 (Rock1) mRNA, encodes complete protein.	Multiple_Complex
TC1000001793.mm.1	14.18	15.13	-1.93	1.58e-06	0.0003	Gm8355	predicted pseudogene 8355 [Source:MGI Symbol;Acc:MGI:3645191]	Pseudogene
TC1300002777.mm.1	7.06	8.01	-1.93	0.0648	0.2627	Zfp825	zinc finger protein 825	Multiple_Complex
TC1800001109.mm.1	7.94	8.89	-1.93	0.8036	0.9154			NonCoding
TC1500001900.mm.1	12.34	13.29	-1.93	0.0442	0.2121	Gm24204	predicted gene, 24204 [Source:MGI Symbol;Acc:MGI:5453981]	Small_RNA
TC0X00003079.mm.1	6.92	7.87	-1.93	0.0005	0.014	Tex13	testis expressed gene 13	Multiple_Complex
TC0X00000675.mm.1	6.78	7.73	-1.93	0.0717	0.2771	Xlr5b	X-linked lymphocyte-regulated 5B	Coding
TC1100003637.mm.1	4.94	5.89	-1.93	0.3713	0.642	Gm11572	predicted gene 11572 [Source:MGI Symbol;Acc:MGI:3649589]	Pseudogene
TC0200000802.mm.1	10.1	11.05	-1.93	0.3337	0.6122	Gm13525	predicted gene 13525 [Source:MGI Symbol;Acc:MGI:3650225]	Pseudogene
TC0200002740.mm.1	5.76	6.71	-1.93	0.1028	0.3374	Gm14301	predicted gene 14301 [Source:MGI Symbol;Acc:MGI:3650436]	Multiple_Complex
TC0900000117.mm.1	7.71	8.66	-1.93	0.0536	0.2364	Taf1d; Gm25500	TATA box binding protein (Tbp)-associated factor, RNA polymerase I, D; predicted gene, 25500	Multiple_Complex
TC1300002219.mm.1	8.54	9.49	-1.93	0.1378	0.3925			NonCoding
TC0900001623.mm.1	5.11	6.06	-1.93	0.5335	0.7609	Deb1	differentially expressed in B16F10 1	Multiple_Complex
TC0300000139.mm.1	6.9	7.84	-1.93	0.0045	0.0566	Hltf	helicase-like transcription factor; helicase-like transcription factor (Hltf), transcript variant 1, mRNA.	Multiple_Complex
TC1900001095.mm.1	12.85	13.8	-1.93	0.43	0.6873	Fads2	fatty acid desaturase 2	Coding
TC0700001314.mm.1	7.93	8.88	-1.93	2.11e-06	0.0004			NonCoding
TC1300002235.mm.1	9.9	10.85	-1.93	0.1865	0.4603	Gm10323	predicted gene 10323 [Source:MGI Symbol;Acc:MGI:3809062]	Coding
TC0X00001569.mm.1	6.74	7.69	-1.93	0.9046	0.9603	Samt4	spermatogenesis associated multipass transmembrane protein 4	Coding
TC0300000673.mm.1	10.02	10.97	-1.93	0.3381	0.6159	Gm9790	predicted gene 9790 [Source:MGI Symbol;Acc:MGI:3704221]	Coding
TC1600000711.mm.1	7.86	8.81	-1.93	0.4298	0.6872	Gm19723	PREDICTED: predicted gene, 19723 (Gm19723), miscRNA.	NonCoding
TC0200004266.mm.1	13.19	14.14	-1.93	4.63e-05	0.0029	Rpl10-ps1	ribosomal protein L10, pseudogene 1	Pseudogene
TC0300001116.mm.1	9.38	10.33	-1.93	0.0161	0.1203	Lamtor5	late endosomal/lysosomal adaptor, MAPK and MTOR activator 5	Coding
TC1100002179.mm.1	12.53	13.48	-1.93	0.3735	0.6435	Gm11975	predicted gene 11975 [Source:MGI Symbol;Acc:MGI:3650057]	Multiple_Complex
TC0100000197.mm.1	7.83	8.78	-1.93	0.6147	0.8116			NonCoding
TC0700003726.mm.1	8.02	8.97	-1.93	0.1129	0.3536	Tmem126a	transmembrane protein 126A	Multiple_Complex
TC0700000294.mm.1	9.86	10.81	-1.93	0.0315	0.1763	Gm25134	predicted gene, 25134 [Source:MGI Symbol;Acc:MGI:5454911]	Small_RNA
TC1400000840.mm.1	4.46	5.41	-1.93	0.2761	0.5591	Gm16261	predicted gene 16261 [Source:MGI Symbol;Acc:MGI:3826544]	Multiple_Complex
TC0200004308.mm.1	5.97	6.91	-1.93	9.2e-10	1.6e-06	Bbox1	butyrobetaine (gamma), 2-oxoglutarate dioxygenase 1 (gamma-butyrobetaine hydroxylase)	Coding
TC0Y00000333.mm.1	16.47	17.42	-1.93	0.3453	0.6219	Gm21729	predicted gene, 21729 [Source:MGI Symbol;Acc:MGI:5433893]	Coding
TC1300002234.mm.1	11.51	12.46	-1.93	0.0312	0.1753	Gm17449	predicted gene, 17449 [Source:MGI Symbol;Acc:MGI:4937083]	Coding
TC1400000199.mm.1	6.34	7.29	-1.93	0.0962	0.3254	Gm23502	predicted gene, 23502 [Source:MGI Symbol;Acc:MGI:5453279]	Small_RNA
TC0600002133.mm.1	7.19	8.14	-1.93	0.2428	0.5256	Mrps33	mitochondrial ribosomal protein S33	Multiple_Complex
TC0Y00000398.mm.1	14.12	15.07	-1.93	0.2915	0.5734	Gm21861; LOC380994; Gm21739	predicted gene, 21861 [Source:MGI Symbol;Acc:MGI:5434025]; SubName: Full=LOC380994 protein;; predicted gene, 21739	Multiple_Complex
TC1000000784.mm.1	8.56	9.51	-1.93	0.0061	0.0683	Cstb	cystatin B	Coding
TC0M00000027.mm.1	14.4	15.35	-1.93	0.2077	0.4866	ND6	NADH dehydrogenase subunit 6	Multiple_Complex
TC1300000889.mm.1	13.65	14.59	-1.93	0.0148	0.1151	Gm8062	predicted pseudogene 8062 [Source:MGI Symbol;Acc:MGI:3643433]	Pseudogene
TC1800000393.mm.1	14.91	15.86	-1.93	0.0232	0.1476	Gm10268	predicted gene 10268 [Source:MGI Symbol;Acc:MGI:3642637]	Pseudogene
TC0500000925.mm.1	10.44	11.38	-1.92	0.2145	0.4946	Mrpl1	mitochondrial ribosomal protein L1	Coding
TC0400002677.mm.1	10.7	11.64	-1.92	0.046	0.217	Gm12469	predicted gene 12469 [Source:MGI Symbol;Acc:MGI:3652114]	Multiple_Complex
TC1600001268.mm.1	12.05	13	-1.92	0.262	0.5452	Rpl31-ps12	ribosomal protein L31, pseudogene 1 2	Multiple_Complex
TC0200002730.mm.1	9.94	10.88	-1.92	0.3522	0.6267	Gm16356	predicted gene 16356 [Source:MGI Symbol;Acc:MGI:3840122]	Pseudogene
TC1200000138.mm.1	12.07	13.01	-1.92	0.2622	0.5455			NonCoding
TSUnmapped00000031.mm.1	5.28	6.23	-1.92	0.763	0.8947	Cd99	CD99 antigen	Coding
TC0X00002878.mm.1	6.19	7.13	-1.92	0.0056	0.0649	Chm	choroidermia (RAB escort protein 1); choroidermia	Multiple_Complex
TC0300000130.mm.1	15.26	16.2	-1.92	0.022	0.1432	Gm23330	predicted gene, 23330 [Source:MGI Symbol;Acc:MGI:5453107]	Small_RNA
TC0400003699.mm.1	10.27	11.22	-1.92	0.6683	0.8437			NonCoding
TC0Y00000304.mm.1	13.65	14.59	-1.92	0.2407	0.5235	Gm28490; FJ541100; 1700040F15Rik	predicted gene 28490 [Source:MGI Symbol;Acc:MGI:5579196]; adult male testis cDNA, RIKEN full-length enriched library, clone:4932704C20 product:weakly similar to X-LINKED LYMPHOCYTE-REGULATED PROTEIN PM1 [], full insert sequence.; RIKEN cDNA 1700040F15 gene	Multiple_Complex
TC0200000372.mm.1	11.1	12.04	-1.92	0.4888	0.7287	Gm13392	predicted gene 13392	Pseudogene
TC0400003049.mm.1	6.73	7.68	-1.92	0.5536	0.7738	4930577H14Rik; RP23-311D24.1	RIKEN cDNA 4930577H14 gene [Source:MGI Symbol;Acc:MGI:1925473]; novel transcript	NonCoding
TC0Y00000362.mm.1	12.68	13.62	-1.92	0.5224	0.7527	Gm20884	predicted gene, 20884	Coding
TC0Y00000421.mm.1	12.68	13.62	-1.92	0.5224	0.7527	Gm21654	predicted gene, 21654	Coding
TC0200004657.mm.1	9.55	10.5	-1.92	0.9455	0.978			NonCoding
TC0300000137.mm.1	6.59	7.53	-1.92	0.0057	0.0655	Cp	ceruloplasmin	Multiple_Complex
TC1100003288.mm.1	9.29	10.24	-1.92	0.1775	0.4488	Rpl23a; Snord42b	ribosomal protein L23A; small nucleolar RNA, C/D box 42B	Multiple_Complex
TC0Y00000220.mm.1	14.23	15.17	-1.92	0.3061	0.587	Gm20837	predicted gene, 20837	Multiple_Complex
TC0800003200.mm.1	9.05	10	-1.92	0.0266	0.1607	Tomm20	translocase of outer mitochondrial membrane 20 homolog (yeast)	Multiple_Complex
TC0100000605.mm.1	11.49	12.43	-1.92	0.0192	0.1328	Gm15843	predicted gene 15843 [Source:MGI Symbol;Acc:MGI:3801845]	Pseudogene
TC0600003417.mm.1	8.11	9.05	-1.92	0.0057	0.0652	Kras	v-Ki-ras2 Kirsten rat sarcoma viral oncogene homolog	Multiple_Complex
TC0400003116.mm.1	6.75	7.69	-1.92	0.1601	0.4255	Tm2d1	TM2 domain containing 1; TM2 domain containing 1 (Tm2d1), mRNA.	Multiple_Complex
TC0Y00000453.mm.1	13.12	14.06	-1.92	0.4218	0.681	Gm20823; Gm20844	predicted gene, 20823 (Gm20823), mRNA.; predicted gene, 20844; predicted gene, 20823	Coding
[truncated: 63,961 more rows]

## Sheet: > 2-fold changed
ID	Hipk4-/- Avg (log2)	WT Avg (log2)	Fold Change		Log2(fold change)	P-val	Log2(P-val)	FDR P-val	Gene Symbol	Description	Group
TC0700000462.mm.1	5.72	8.82	-8.57	0.116686	-3.0993	7.67e-16	15.1152	5.06e-11	Hipk4	homeodomain interacting protein kinase 4	Coding
TC1000002929.mm.1	8.36	11.34	-7.89	0.126743	-2.98003	0.0065	2.18709	0.0706	Lyz2	lysozyme 2	Coding
TC1000002669.mm.1	8.46	11.41	-7.68	0.130208	-2.94111	0.0161	1.79317	0.1205	Gm24119	predicted gene, 24119 [Source:MGI Symbol;Acc:MGI:5453896]	Small_RNA
TC0500003389.mm.1	8.77	11.64	-7.31	0.136799	-2.86987	0.0123	1.91009	0.1027	Gm25492	predicted gene, 25492 [Source:MGI Symbol;Acc:MGI:5455269]	Small_RNA
TC0400001396.mm.1	9.12	11.98	-7.31	0.136799	-2.86987	0.0147	1.83268	0.1146	Gm25788	predicted gene, 25788 [Source:MGI Symbol;Acc:MGI:5455565]	Small_RNA
TC0M00000021.mm.1	7.41	10.22	-7.04	0.142045	-2.81558	0.0258	1.58838	0.1575	mt-Ta	mitochondrially encoded tRNA alanine [Source:MGI Symbol;Acc:MGI:102491]	tRNA
TC0700001613.mm.1	7.17	9.97	-6.99	0.143062	-2.80529	0.038	1.42022	0.1947	Gm24888	predicted gene, 24888 [Source:MGI Symbol;Acc:MGI:5454665]	Small_RNA
TC0M00000008.mm.1	8.48	11.28	-6.96	0.143678	-2.79909	0.0263	1.58004	0.1593	mt-Tk	mitochondrially encoded tRNA lysine [Source:MGI Symbol;Acc:MGI:102483]	tRNA
TC0700000788.mm.1	9.43	12.17	-6.7	0.149254	-2.74416	0.0003	3.52288	0.0095	Klk1b27	kallikrein 1-related peptidase b27	Coding
TC0M00000022.mm.1	10.15	12.87	-6.58	0.151976	-2.71809	0.0118	1.92812	0.1004	mt-Tn	mitochondrially encoded tRNA asparagine [Source:MGI Symbol;Acc:MGI:102479]	tRNA
TC1100003057.mm.1	10.3	12.97	-6.37	0.156986	-2.67129	0.0388	1.41117	0.1969	Gm25835	predicted gene, 25835 [Source:MGI Symbol;Acc:MGI:5455612]	Small_RNA
TC1500002177.mm.1	9.99	12.66	-6.34	0.157729	-2.66448	0.0044	2.35655	0.0559	Snora34; Mir1291	small nucleolar RNA, H/ACA box 34; microRNA 1291	Multiple_Complex
TC0800000135.mm.1	8.66	11.25	-6.05	0.165289	-2.59694	0.0108	1.96658	0.0953	Gm24698	predicted gene, 24698 [Source:MGI Symbol;Acc:MGI:5454475]	Small_RNA
TC0M00000014.mm.1	11.35	13.94	-6.04	0.165563	-2.59455	0.0444	1.35262	0.2126	mt-Th	mitochondrially encoded tRNA histidine [Source:MGI Symbol;Acc:MGI:102485]	tRNA
TC0700000790.mm.1	7.98	10.54	-5.88	0.170068	-2.55582	0.0084	2.07572	0.0819	Klk1b22	kallikrein 1-related peptidase b22	Coding
TC0700000789.mm.1	10.45	13	-5.87	0.170358	-2.55336	0.0006	3.22185	0.0149	Klk1b21	kallikrein 1-related peptidase b21	Coding
TC0400001397.mm.1	7.75	10.28	-5.79	0.172712	-2.53356	0.0149	1.82681	0.1153	Gm22154	predicted gene, 22154 [Source:MGI Symbol;Acc:MGI:5451931]	Small_RNA
TC0900001597.mm.1	7.18	9.71	-5.77	0.17331	-2.52857	0.0255	1.59346	0.1562	Gm26448	predicted gene, 26448 [Source:MGI Symbol;Acc:MGI:5456225]	Small_RNA
TC0X00003147.mm.1	9.22	11.73	-5.7	0.175439	-2.51096	0.032	1.49485	0.1778	Gm25107	predicted gene, 25107 [Source:MGI Symbol;Acc:MGI:5454884]	Small_RNA
TC0700002993.mm.1	11.09	13.59	-5.67	0.176367	-2.50335	0.0257	1.59007	0.1572	Snord35a	small nucleolar RNA, C/D box 35A	Small_RNA
TSUnmapped00000176.mm.1	9.55	12.05	-5.65	0.176991	-2.49825	0.0398	1.40012	0.2	Snora73b	small nucleolar RNA, H/ACA box 73b	Small_RNA
TC0400003669.mm.1	9.93	12.4	-5.55	0.18018	-2.47249	0.04	1.39794	0.2005	Snora73b	small nucleolar RNA, H/ACA box 73b	Small_RNA
TC0700000792.mm.1	10.63	13.09	-5.5	0.181818	-2.45943	0.0004	3.39794	0.0114	Klk1b24	kallikrein 1-related peptidase b24	Coding
TSUnmapped00000177.mm.1	9.9	12.28	-5.2	0.192308	-2.37851	0.0419	1.37779	0.206	Snora73a	small nucleolar RNA, H/ACA box 73a	Small_RNA
TC0X00002058.mm.1	6.34	8.72	-5.19	0.192678	-2.37573	0.0202	1.69465	0.1369	Snora69	small nucleolar RNA, H/ACA box 69	Small_RNA
TC0200001973.mm.1	11.7	14.07	-5.17	0.193424	-2.37016	0.0072	2.14267	0.0751	Snord110	small nucleolar RNA, C/D box 110	Small_RNA
TC1300001923.mm.1	6.65	9	-5.09	0.196464	-2.34767	0.0197	1.70553	0.1347	Gm24620	predicted gene, 24620 [Source:MGI Symbol;Acc:MGI:5454397]	Small_RNA
TC1300000569.mm.1	9.14	11.49	-5.09	0.196464	-2.34767	0.0062	2.20761	0.0684	Ogn	osteoglycin	Coding
TC0500001513.mm.1	12.73	15.05	-4.99	0.200401	-2.31904	0.0029	2.5376	0.0429	Gm23245	predicted gene, 23245 [Source:MGI Symbol;Acc:MGI:5453022]	Small_RNA
TC0X00002273.mm.1	13.25	15.55	-4.92	0.203252	-2.29866	0.0187	1.72816	0.1313	Snord61	small nucleolar RNA, C/D box 61	Small_RNA
TSUnmapped00000178.mm.1	7.59	9.87	-4.86	0.205761	-2.28096	0.0192	1.7167	0.1328	Snord14e	small nucleolar RNA, C/D box 14E	Small_RNA
TSUnmapped00000186.mm.1	11.14	13.36	-4.67	0.214133	-2.22342	0.0154	1.81248	0.1179	Rnu3a	U3A small nuclear RNA	Small_RNA
TC0200004759.mm.1	12.84	15.04	-4.57	0.218818	-2.19219	0.0309	1.51004	0.1743	Snord17	small nucleolar RNA, C/D box 17	Small_RNA
TC0500001963.mm.1	12.83	15.02	-4.57	0.218818	-2.19219	0.0185	1.73283	0.1304	Gm10108	predicted pseudogene 10108 [Source:MGI Symbol;Acc:MGI:3642431]	Pseudogene
TC0200004100.mm.1	12.24	14.43	-4.56	0.219298	-2.18903	0.0221	1.65561	0.1433	Gm13772	predicted gene 13772 [Source:MGI Symbol;Acc:MGI:3650155]	Multiple_Complex
TC0300003172.mm.1	11.02	13.2	-4.51	0.221729	-2.17313	0.0253	1.59688	0.1556	Gm24494	predicted gene, 24494 [Source:MGI Symbol;Acc:MGI:5454271]	Small_RNA
TC0700001388.mm.1	11.67	13.84	-4.5	0.222222	-2.16993	0.0112	1.95078	0.0973	n-R5s156	nuclear encoded rRNA 5S 156 [Source:MGI Symbol;Acc:MGI:4422019]	Ribosomal
TC0200002581.mm.1	9.93	12.1	-4.49	0.222717	-2.16672	0.0067	2.17393	0.072	Gm23201	predicted gene, 23201 [Source:MGI Symbol;Acc:MGI:5452978]	Small_RNA
TC0400001583.mm.1	10.21	12.38	-4.48	0.223214	-2.1635	0.0003	3.52288	0.0108	Snora16a	small nucleolar RNA, H/ACA box 16A	Small_RNA
TC1200002153.mm.1	13.13	15.29	-4.48	0.223214	-2.1635	0.0086	2.0655	0.0833	Gm25776	predicted gene, 25776 [Source:MGI Symbol;Acc:MGI:5455553]	Small_RNA
TC0100001119.mm.1	9.42	11.56	-4.42	0.226244	-2.14405	0.0192	1.7167	0.1328	Gm23734	predicted gene, 23734 [Source:MGI Symbol;Acc:MGI:5453511]	Small_RNA
TC1400001062.mm.1	8.66	10.78	-4.37	0.228833	-2.12763	0.0455	1.34199	0.2158	Snora31	small nucleolar RNA, H/ACA box 31	Small_RNA
TC0900000812.mm.1	13.57	15.69	-4.36	0.229358	-2.12433	0.0226	1.64589	0.1453	Snord16a	small nucleolar RNA, C/D box 16A	Small_RNA
TC0800001976.mm.1	11.64	13.76	-4.36	0.229358	-2.12433	0.0471	1.32698	0.2199	Snord13	small nucleolar RNA, C/D box 13	Small_RNA
TC1100001339.mm.1	13.32	15.44	-4.34	0.230415	-2.1177	0.006	2.22185	0.0677	Rnu3b1	U3B small nuclear RNA 1 (Rnu3b1), small nuclear RNA.	Multiple_Complex
TC1100001340.mm.1	13.32	15.44	-4.34	0.230415	-2.1177	0.006	2.22185	0.0677	Rnu3b3	U3B small nuclear RNA 3 (Rnu3b3), small nuclear RNA.	Multiple_Complex
TC1100001343.mm.1	13.32	15.44	-4.34	0.230415	-2.1177	0.006	2.22185	0.0677	Rnu3b2	U3B small nuclear RNA 2 (Rnu3b2), small nuclear RNA.	Multiple_Complex
TC0X00003409.mm.1	10.16	12.26	-4.29	0.2331	-2.10098	0.0148	1.82974	0.1153	Gm15097	predicted gene 15097	Coding
TC0700002991.mm.1	6.82	8.91	-4.26	0.234742	-2.09085	0.0315	1.50169	0.1764	Snord35b	small nucleolar RNA, C/D box 35B	Small_RNA
TC0800003201.mm.1	15.5	17.59	-4.26	0.234742	-2.09085	0.0072	2.14267	0.0753	Gm26397	predicted gene, 26397 [Source:MGI Symbol;Acc:MGI:5456174]	Small_RNA
TC0700001621.mm.1	8.25	10.33	-4.24	0.235849	-2.08406	0.0361	1.44249	0.1898	Gm25636	predicted gene, 25636 [Source:MGI Symbol;Acc:MGI:5455413]	Small_RNA
TSUnmapped00000135.mm.1	13.32	15.4	-4.22	0.236967	-2.07724	0.0093	2.03152	0.0867	Rnu3b4	U3B small nuclear RNA 4	Small_RNA
TC1100000804.mm.1	11.33	13.4	-4.2	0.238095	-2.07039	0.0317	1.49894	0.1769	Snord49b	small nucleolar RNA, C/D box 49B	Small_RNA
TC0400003684.mm.1	6.12	8.17	-4.13	0.242131	-2.04614	0.0391	1.40782	0.1977	Gm22767	predicted gene, 22767 [Source:MGI Symbol;Acc:MGI:5452544]	Small_RNA
TC1600001636.mm.1	7.42	9.46	-4.11	0.243309	-2.03914	0.0463	1.33442	0.2175	Gm25989	predicted gene, 25989 [Source:MGI Symbol;Acc:MGI:5455766]	Small_RNA
TC0Y00000230.mm.1	12.25	14.28	-4.08	0.245098	-2.02857	0.0186	1.73049	0.1311	n-R5s1	nuclear encoded rRNA 5S 1 [Source:MGI Symbol;Acc:MGI:4421733]	Ribosomal
TC0100001948.mm.1	13.87	15.9	-4.07	0.2457	-2.02503	0.0041	2.38722	0.0536	Snord87	small nucleolar RNA, C/D box 87	Small_RNA
TC0M00000025.mm.1	8.04	10.06	-4.06	0.246305	-2.02148	0.0331	1.48017	0.1814	mt-Ts1	mitochondrially encoded tRNA serine 1 [Source:MGI Symbol;Acc:MGI:102475]	tRNA
TC0X00003404.mm.1	9.6	11.61	-4.03	0.248139	-2.01078	0.0228	1.64207	0.1462	Gm15085; Gm15080; Ott	predicted gene 15085 (Gm15085), mRNA.; predicted gene 15080; ovary testis transcribed; ovary testis transcribed, mRNA (cDNA clone MGC:129142 IMAGE:40038981), complete cds.; predicted gene 15085	Coding
TC0X00003407.mm.1	9.42	11.42	-4	0.25	-2	0.0157	1.8041	0.1193	Luzp4	leucine zipper protein 4	Coding
TSUnmapped00000179.mm.1	13.47	15.46	-4	0.25	-2	0.0082	2.08619	0.0806	Rnu3b2	U3B small nuclear RNA 2	Small_RNA
TSUnmapped00000182.mm.1	13.47	15.46	-4	0.25	-2	0.0082	2.08619	0.0806	Rnu3b3	U3B small nuclear RNA 3	Small_RNA
TSUnmapped00000183.mm.1	13.47	15.46	-4	0.25	-2	0.0082	2.08619	0.0806	Rnu3b1	U3B small nuclear RNA 1	Small_RNA
TC0500001262.mm.1	14.67	16.66	-3.98	0.251256	-1.99277	0.0072	2.14267	0.0753	Gm24265	predicted gene, 24265 [Source:MGI Symbol;Acc:MGI:5454042]	Small_RNA
TC0100002740.mm.1	7	8.99	-3.96	0.252525	-1.9855	0.0065	2.18709	0.071	Snora75	small nucleolar RNA, H/ACA box 75	Small_RNA
TC1200000143.mm.1	7.14	9.12	-3.95	0.253165	-1.98185	0.0113	1.94692	0.0977	Gm22748	predicted gene, 22748 [Source:MGI Symbol;Acc:MGI:5452525]	Small_RNA
TC1200000135.mm.1	8.55	10.53	-3.94	0.253807	-1.9782	0.024	1.61979	0.1509	Gm22303	predicted gene, 22303 [Source:MGI Symbol;Acc:MGI:5452080]	Small_RNA
TC0X00003410.mm.1	9.51	11.49	-3.94	0.253807	-1.9782	0.0231	1.63639	0.1471	Gm15091	predicted gene 15091	Coding
TC0X00003406.mm.1	9.34	11.32	-3.93	0.254453	-1.97453	0.0157	1.8041	0.1194	Gm15127	predicted gene 15127	Coding
TC0800002928.mm.1	11.74	13.7	-3.91	0.255754	-1.96717	0.0027	2.56864	0.0408	Snord111	small nucleolar RNA, C/D box 111	Small_RNA
TC1200000504.mm.1	6.79	8.75	-3.89	0.257069	-1.95977	0.0374	1.42713	0.1929	Gm24233	predicted gene, 24233 [Source:MGI Symbol;Acc:MGI:5454010]	Small_RNA
TC1300000573.mm.1	7.74	9.69	-3.88	0.257732	-1.95606	0.0265	1.57675	0.1603	Gm25394	predicted gene, 25394 [Source:MGI Symbol;Acc:MGI:5455171]	Small_RNA
TC0X00001487.mm.1	9.39	11.35	-3.87	0.258398	-1.95233	0.0257	1.59007	0.1572	Gm10439; Gm15093; Gm15085; Ott	predicted gene 10439; predicted gene 15093 (Gm15093), mRNA.; predicted gene 15085 (Gm15085), mRNA.; ovary testis transcribed (Ott), mRNA.; predicted gene 15085; ovary testis transcribed, mRNA (cDNA clone MGC:129142 IMAGE:40038981), complete cds.; predicted gene 15093	Coding
TC0100000599.mm.1	14.2	16.14	-3.84	0.260417	-1.94111	0.0173	1.76195	0.1257	Gm24497	predicted gene, 24497 [Source:MGI Symbol;Acc:MGI:5454274]	Small_RNA
TC0X00003405.mm.1	9.36	11.29	-3.83	0.261097	-1.93734	0.0179	1.74715	0.1278	Gm15107; Gm15114; Gm15093; Gm15085; Ott	predicted gene 15107; predicted gene 15114; predicted gene 15093; predicted gene 15085; predicted gene 15085 (Gm15085), mRNA.; ovary testis transcribed (Ott), mRNA.; ovary testis transcribed, mRNA (cDNA clone MGC:129142 IMAGE:40038981), complete cds.	Multiple_Complex
TC0700002510.mm.1	7.47	9.41	-3.82	0.26178	-1.93357	0.0141	1.85078	0.1121	n-R5s152	nuclear encoded rRNA 5S 152 [Source:MGI Symbol;Acc:MGI:4422015]	Ribosomal
TC0100000598.mm.1	14.32	16.26	-3.82	0.26178	-1.93357	0.0162	1.79048	0.1207	Gm23472	predicted gene, 23472 [Source:MGI Symbol;Acc:MGI:5453249]	Small_RNA
TC1100001245.mm.1	14.32	16.26	-3.82	0.26178	-1.93357	0.0162	1.79048	0.1207	Gm23444	predicted gene, 23444 [Source:MGI Symbol;Acc:MGI:5453221]	Small_RNA
TC0700000229.mm.1	13.76	15.69	-3.81	0.262467	-1.92979	0.0141	1.85078	0.112	n-R5s151	nuclear encoded rRNA 5S 151 [Source:MGI Symbol;Acc:MGI:4422013]	Ribosomal
TC1100001662.mm.1	12.87	14.8	-3.8	0.263158	-1.926	0.0247	1.6073	0.1534	Gm26316	predicted gene, 26316 [Source:MGI Symbol;Acc:MGI:5456093]	Small_RNA
TC1300001668.mm.1	8.98	10.9	-3.79	0.263852	-1.9222	0.0177	1.75203	0.1271	Gm22358	predicted gene, 22358 [Source:MGI Symbol;Acc:MGI:5452135]	Small_RNA
TC1000002930.mm.1	5.77	7.69	-3.78	0.26455	-1.91839	0.0149	1.82681	0.1157	Lyz1	lysozyme 1	Coding
TC1100003289.mm.1	12.22	14.14	-3.78	0.26455	-1.91839	0.0056	2.25181	0.0644	Snord42a	small nucleolar RNA, C/D box 42A	Small_RNA
TC1100003657.mm.1	11.57	13.49	-3.77	0.265252	-1.91456	0.0143	1.84466	0.1131	Snora21	small nucleolar RNA, H/ACA box 21	Small_RNA
TC1100001659.mm.1	12.05	13.97	-3.77	0.265252	-1.91456	0.0262	1.5817	0.1588	Gm11625	predicted gene 11625 [Source:MGI Symbol;Acc:MGI:3650862]	Multiple_Complex
TC1000001189.mm.1	9.33	11.25	-3.77	0.265252	-1.91456	3.02e-07	6.51999	0.0001	Dcn	decorin	Multiple_Complex
TC0X00003408.mm.1	9.53	11.42	-3.71	0.269542	-1.89142	0.023	1.63827	0.1469	Gm15093; Gm15085; Ott	predicted gene 15093 (Gm15093), mRNA.; predicted gene 15085 (Gm15085), mRNA.; ovary testis transcribed (Ott), mRNA.; ovary testis transcribed; predicted gene 15093; ovary testis transcribed, mRNA (cDNA clone MGC:129142 IMAGE:40038981), complete cds.; predicted gene 15085	Coding
TC1800000292.mm.1	10.59	12.48	-3.7	0.27027	-1.88753	0.0186	1.73049	0.1308	n-R5s25	nuclear encoded rRNA 5S 25 [Source:MGI Symbol;Acc:MGI:4421760]	Ribosomal
TC1100001665.mm.1	14.37	16.25	-3.67	0.27248	-1.87578	0.0156	1.80688	0.1185	Gm23849	predicted gene, 23849 [Source:MGI Symbol;Acc:MGI:5453626]	Small_RNA
TC1100003811.mm.1	14.37	16.25	-3.67	0.27248	-1.87578	0.0156	1.80688	0.1185	Gm23971	predicted gene, 23971 [Source:MGI Symbol;Acc:MGI:5453748]	Small_RNA
TC0100000460.mm.1	8.53	10.4	-3.67	0.27248	-1.87578	0.0404	1.39362	0.2015	Snord11	small nucleolar RNA, C/D box 11	Small_RNA
TC0X00001160.mm.1	5.98	7.86	-3.66	0.273224	-1.87184	0.0173	1.76195	0.1257	Gm24438	predicted gene, 24438 [Source:MGI Symbol;Acc:MGI:5454215]	Small_RNA
TC0100001865.mm.1	9.74	11.61	-3.65	0.273973	-1.8679	0.0057	2.24413	0.0654	Gm22265	predicted gene, 22265 [Source:MGI Symbol;Acc:MGI:5452042]	Small_RNA
TC1900000398.mm.1	11.25	13.1	-3.6	0.277778	-1.848	0.0095	2.02228	0.0876	Gm10053	predicted gene 10053 [Source:MGI Symbol;Acc:MGI:3704493]	Coding
TC1000001299.mm.1	13.61	15.45	-3.58	0.27933	-1.83996	0.0126	1.89963	0.1044	Gm25117	predicted gene, 25117 [Source:MGI Symbol;Acc:MGI:5454894]	Small_RNA
TC1100000648.mm.1	7.28	9.12	-3.58	0.27933	-1.83996	0.0032	2.49485	0.0461	Gm12238	predicted gene 12238	Multiple_Complex
TC0900000820.mm.1	5.4	7.24	-3.57	0.280112	-1.83592	0.0299	1.52433	0.1711	Gm24289	predicted gene, 24289 [Source:MGI Symbol;Acc:MGI:5454066]	Small_RNA
TC0M00000018.mm.1	13.13	14.97	-3.56	0.280899	-1.83188	0.0265	1.57675	0.1603			NonCoding
TC1700000925.mm.1	9.29	11.12	-3.56	0.280899	-1.83188	0.0173	1.76195	0.1257	n-R5s28	nuclear encoded rRNA 5S 28 [Source:MGI Symbol;Acc:MGI:4421873]	Ribosomal
TC0M00000028.mm.1	13.9	15.73	-3.56	0.280899	-1.83188	0.0063	2.20066	0.0693	mt-Te	mitochondrially encoded tRNA glutamic acid [Source:MGI Symbol;Acc:MGI:102488]	tRNA
TC0300002619.mm.1	14.42	16.23	-3.52	0.284091	-1.81558	0.0248	1.60555	0.1537	Sycp1	synaptonemal complex protein 1	Coding
TC0100003237.mm.1	10.39	12.19	-3.49	0.286533	-1.80323	0.0039	2.40894	0.0522	Gm15453	predicted gene 15453	Multiple_Complex
TSUnmapped00000184.mm.1	14.57	16.37	-3.49	0.286533	-1.80323	0.0142	1.84771	0.1124	Rnu2-10	U2 small nuclear RNA 10	Small_RNA
TC0900001281.mm.1	11.3	13.11	-3.49	0.286533	-1.80323	0.0077	2.11351	0.0782	n-R5s88	nuclear encoded rRNA 5S 88 [Source:MGI Symbol;Acc:MGI:4421936]	Ribosomal
TC0800003119.mm.1	15.27	17.07	-3.48	0.287356	-1.79909	0.0083	2.08092	0.0811	n-R5s115	nuclear encoded rRNA 5S 115 [Source:MGI Symbol;Acc:MGI:4421965]	Ribosomal
TC1100001667.mm.1	14.48	16.28	-3.48	0.287356	-1.79909	0.0154	1.81248	0.1178	Rnu2-10	U2 small nuclear RNA 10	Small_RNA
TSUnmapped00000175.mm.1	11.87	13.66	-3.46	0.289017	-1.79077	0.0418	1.37882	0.2059	Snord13	small nucleolar RNA, C/D box 13	Small_RNA
TC0700001584.mm.1	12.08	13.86	-3.45	0.289855	-1.7866	0.0033	2.48149	0.0467	Gm10156	predicted gene 10156 [Source:MGI Symbol;Acc:MGI:3642344]	Pseudogene
TC0800000395.mm.1	14.35	16.13	-3.45	0.289855	-1.7866	0.0044	2.35655	0.0564	Gm24727	predicted gene, 24727 [Source:MGI Symbol;Acc:MGI:5454504]	Small_RNA
TC0800003116.mm.1	13.82	15.6	-3.44	0.290698	-1.78241	0.0328	1.48413	0.1805	n-R5s112	nuclear encoded rRNA 5S 112 [Source:MGI Symbol;Acc:MGI:4421960]	Ribosomal
TC0800003124.mm.1	13.82	15.6	-3.44	0.290698	-1.78241	0.0328	1.48413	0.1805	n-R5s120	nuclear encoded rRNA 5S 120 [Source:MGI Symbol;Acc:MGI:4421972]	Ribosomal
TC0800003129.mm.1	13.82	15.6	-3.44	0.290698	-1.78241	0.0328	1.48413	0.1805	n-R5s125	nuclear encoded rRNA 5S 125 [Source:MGI Symbol;Acc:MGI:4421979]	Ribosomal
TC0X00001118.mm.1	8.07	9.85	-3.44	0.290698	-1.78241	0.0068	2.16749	0.0728	Tex16; L1Md-Gf21	testis expressed gene 16; PREDICTED: L1 repeat, Gf subfamily, member 21 (L1Md-Gf21), miscRNA.	Multiple_Complex
TC0100000256.mm.1	10.13	11.91	-3.42	0.292398	-1.774	0.019	1.72125	0.1322	n-R5s210	nuclear encoded rRNA 5S 210 [Source:MGI Symbol;Acc:MGI:4422075]	Ribosomal
TC1000000346.mm.1	11.95	13.72	-3.42	0.292398	-1.774	0.0255	1.59346	0.1563	Rnu3a	U3A small nuclear RNA	Multiple_Complex
TC0500003655.mm.1	5.91	7.68	-3.41	0.293255	-1.76977	0.0252	1.5986	0.1552	n-R5s180	nuclear encoded rRNA 5S 180 [Source:MGI Symbol;Acc:MGI:4422045]	Ribosomal
TC0300000905.mm.1	12.63	14.39	-3.4	0.294118	-1.76553	0.0333	1.47756	0.182	Hormad1	HORMA domain containing 1	Multiple_Complex
TC0X00003403.mm.1	9.89	11.64	-3.36	0.297619	-1.74846	0.0422	1.37469	0.2065	Gm15128; Gm15107	predicted gene 15128; predicted gene 15107	Coding
TC0400003663.mm.1	11.6	13.34	-3.34	0.299401	-1.73985	0.0195	1.70997	0.1343	Gm13252	predicted gene 13252 [Source:MGI Symbol;Acc:MGI:3651953]	Multiple_Complex
TC1100002700.mm.1	15.94	17.68	-3.33	0.3003	-1.73552	0.0045	2.34679	0.0569	Gm25291	predicted gene, 25291 [Source:MGI Symbol;Acc:MGI:5455068]	Small_RNA
TC0400003664.mm.1	12.62	14.36	-3.33	0.3003	-1.73552	0.037	1.4318	0.1919	Rnu11	U11 small nuclear RNA	Small_RNA
TC0600002253.mm.1	8.63	10.36	-3.32	0.301205	-1.73118	0.0149	1.82681	0.1157	Cycs	cytochrome c, somatic	Multiple_Complex
TC1700000408.mm.1	14.43	16.16	-3.32	0.301205	-1.73118	0.0049	2.3098	0.06	Gm23123	predicted gene, 23123 [Source:MGI Symbol;Acc:MGI:5452900]	Small_RNA
TC0900000814.mm.1	9.24	10.97	-3.32	0.301205	-1.73118	0.0313	1.50446	0.1757	Gm23136	predicted gene, 23136 [Source:MGI Symbol;Acc:MGI:5452913]	Small_RNA
TC0500001096.mm.1	8.93	10.66	-3.32	0.301205	-1.73118	0.0126	1.89963	0.1045	Ccdc18	coiled-coil domain containing 18	Multiple_Complex
TC0200001013.mm.1	11.09	12.81	-3.3	0.30303	-1.72247	0.0167	1.77728	0.1231	Ssb	Sjogren syndrome antigen B	Multiple_Complex
TC0400002874.mm.1	9.91	11.62	-3.28	0.304878	-1.7137	0.0136	1.86646	0.1097	Gm22864	predicted gene, 22864 [Source:MGI Symbol;Acc:MGI:5452641]	Small_RNA
TC1500000509.mm.1	9.07	10.78	-3.27	0.30581	-1.70929	0.0077	2.11351	0.0785	Gm22519	predicted gene, 22519 [Source:MGI Symbol;Acc:MGI:5452296]	Small_RNA
TC1000000578.mm.1	8.84	10.55	-3.27	0.30581	-1.70929	0.0047	2.3279	0.0586	Gm5424	predicted gene 5424 [Source:MGI Symbol;Acc:MGI:3643173]	Coding
TC0200003704.mm.1	9.86	11.57	-3.26	0.306748	-1.70487	0.0026	2.58503	0.0398	Gm13624	predicted gene 13624 [Source:MGI Symbol;Acc:MGI:3649579]	Multiple_Complex
TC0100000354.mm.1	10.82	12.52	-3.26	0.306748	-1.70487	0.0287	1.54212	0.1675	n-R5s211	nuclear encoded rRNA 5S 211 [Source:MGI Symbol;Acc:MGI:4422076]	Ribosomal
TC0100000600.mm.1	12.47	14.16	-3.23	0.309598	-1.69153	0.0163	1.78781	0.1213	Gm25939	predicted gene, 25939 [Source:MGI Symbol;Acc:MGI:5455716]	Small_RNA
TC1900000716.mm.1	13.42	15.11	-3.23	0.309598	-1.69153	0.0352	1.45346	0.1873	Gm23140	predicted gene, 23140 [Source:MGI Symbol;Acc:MGI:5452917]	Small_RNA
TC0700003466.mm.1	6.42	8.11	-3.22	0.310559	-1.68706	0.0223	1.6517	0.1441	Gm23795	predicted gene, 23795 [Source:MGI Symbol;Acc:MGI:5453572]	Small_RNA
TC1400001179.mm.1	9.87	11.55	-3.21	0.311526	-1.68257	0.0346	1.46092	0.1857	Gm23764	predicted gene, 23764 [Source:MGI Symbol;Acc:MGI:5453541]	Ribosomal
TC1300000788.mm.1	15.67	17.34	-3.19	0.31348	-1.67356	0.0049	2.3098	0.0601	Gm24130	predicted gene, 24130 [Source:MGI Symbol;Acc:MGI:5453907]	Small_RNA
TC0X00002709.mm.1	8.21	9.89	-3.18	0.314465	-1.66903	0.0051	2.29243	0.0616	Tex11	testis expressed gene 11	Coding
TC0200004466.mm.1	7.08	8.75	-3.18	0.314465	-1.66903	0.0179	1.74715	0.1281	n-R5s205	nuclear encoded rRNA 5S 205 [Source:MGI Symbol;Acc:MGI:4422070]	Ribosomal
TC0800003131.mm.1	8.79	10.46	-3.18	0.314465	-1.66903	0.036	1.4437	0.1898	n-R5s127	nuclear encoded rRNA 5S 127 [Source:MGI Symbol;Acc:MGI:4421983]	Ribosomal
TC0100003367.mm.1	6.12	7.78	-3.16	0.316456	-1.65992	0.0182	1.73993	0.1291	Gm24988	predicted gene, 24988 [Source:MGI Symbol;Acc:MGI:5454765]	Small_RNA
TC1600000603.mm.1	13.77	15.42	-3.15	0.31746	-1.65535	0.0425	1.37161	0.2077	Gm26381	predicted gene, 26381 [Source:MGI Symbol;Acc:MGI:5456158]	Ribosomal
TC1600000691.mm.1	8.55	10.2	-3.15	0.31746	-1.65535	0.0115	1.9393	0.0989	Gm7204	predicted pseudogene 7204 [Source:MGI Symbol;Acc:MGI:3645884]	Pseudogene
TC1800000840.mm.1	11.17	12.82	-3.14	0.318471	-1.65076	0.03	1.52288	0.1717	Gm26430	predicted gene, 26430 [Source:MGI Symbol;Acc:MGI:5456207]	Small_RNA
TC0800003105.mm.1	13.62	15.27	-3.13	0.319489	-1.64616	0.0194	1.7122	0.1336	n-R5s101	nuclear encoded rRNA 5S 101 [Source:MGI Symbol;Acc:MGI:4421949]	Ribosomal
TC0800003118.mm.1	13.62	15.27	-3.13	0.319489	-1.64616	0.0194	1.7122	0.1336	n-R5s114	nuclear encoded rRNA 5S 114 [Source:MGI Symbol;Acc:MGI:4421962]	Ribosomal
TC0800003123.mm.1	13.62	15.27	-3.13	0.319489	-1.64616	0.0194	1.7122	0.1336	n-R5s119	nuclear encoded rRNA 5S 119 [Source:MGI Symbol;Acc:MGI:4421971]	Ribosomal
TC0800003133.mm.1	13.62	15.27	-3.13	0.319489	-1.64616	0.0194	1.7122	0.1336	n-R5s129	nuclear encoded rRNA 5S 129 [Source:MGI Symbol;Acc:MGI:4421985]	Ribosomal
TC0800003135.mm.1	13.62	15.27	-3.13	0.319489	-1.64616	0.0194	1.7122	0.1336	n-R5s131	nuclear encoded rRNA 5S 131 [Source:MGI Symbol;Acc:MGI:4421987]	Ribosomal
TC0800003141.mm.1	15.03	16.67	-3.12	0.320513	-1.64155	0.0401	1.39686	0.2008	Gm24089	predicted gene, 24089 [Source:MGI Symbol;Acc:MGI:5453866]	Ribosomal
TC0800003154.mm.1	15.03	16.67	-3.12	0.320513	-1.64155	0.0401	1.39686	0.2008	Gm23647	predicted gene, 23647 [Source:MGI Symbol;Acc:MGI:5453424]	Ribosomal
TC0400001283.mm.1	8.76	10.39	-3.11	0.321543	-1.63691	0.0156	1.80688	0.1186	Gm23143	predicted gene, 23143 [Source:MGI Symbol;Acc:MGI:5452920]	Small_RNA
TC0100001307.mm.1	6.69	8.32	-3.1	0.322581	-1.63227	0.0363	1.44009	0.1898	Gm26048	predicted gene, 26048 [Source:MGI Symbol;Acc:MGI:5455825]	Small_RNA
TC0900001144.mm.1	12.15	13.78	-3.09	0.323625	-1.62761	0.0195	1.70997	0.1342	Gm24463	predicted gene, 24463 [Source:MGI Symbol;Acc:MGI:5454240]	Small_RNA
TC1000002703.mm.1	10.73	12.36	-3.08	0.324675	-1.62293	0.0464	1.33348	0.218	Gm26122	predicted gene, 26122 [Source:MGI Symbol;Acc:MGI:5455899]	Small_RNA
TC1300001837.mm.1	10.35	11.96	-3.05	0.327869	-1.60881	0.0242	1.61618	0.1518	Eef1e1	eukaryotic translation elongation factor 1 epsilon 1	Coding
TC0400002526.mm.1	16.05	17.66	-3.05	0.327869	-1.60881	0.0434	1.36251	0.2101	Rmrp	RNA component of mitochondrial RNAase P	NonCoding
TC1000001081.mm.1	14.5	16.11	-3.05	0.327869	-1.60881	0.0397	1.40121	0.1996	Sycp3	synaptonemal complex protein 3	Coding
TC0100000596.mm.1	11.88	13.49	-3.05	0.327869	-1.60881	0.0352	1.45346	0.1874	Gm25360	predicted gene, 25360 [Source:MGI Symbol;Acc:MGI:5455137]	Small_RNA
TC0M00000005.mm.1	12.47	14.08	-3.05	0.327869	-1.60881	0.0012	2.92082	0.0249	ND2	NADH dehydrogenase subunit 2	Multiple_Complex
TC1600000624.mm.1	7.21	8.81	-3.04	0.328947	-1.60407	0.0388	1.41117	0.197	Gm25873	predicted gene, 25873 [Source:MGI Symbol;Acc:MGI:5455650]	Small_RNA
TC0800002233.mm.1	13	14.6	-3.03	0.330033	-1.59932	0.0204	1.69037	0.1375	Gm25813	predicted gene, 25813 [Source:MGI Symbol;Acc:MGI:5455590]	Small_RNA
TC0400000085.mm.1	9.03	10.63	-3.02	0.331126	-1.59455	0.009	2.04576	0.0856	Ccne2	cyclin E2	Multiple_Complex
TC0500001263.mm.1	14.78	16.38	-3.02	0.331126	-1.59455	0.0078	2.10791	0.0788	Gm24407	predicted gene, 24407 [Source:MGI Symbol;Acc:MGI:5454184]	Small_RNA
TC0400001259.mm.1	7.44	9.03	-3.01	0.332226	-1.58976	0.011	1.95861	0.0963	Prdx1	peroxiredoxin 1	Multiple_Complex
TC0700000784.mm.1	7.91	9.49	-2.99	0.334448	-1.58015	0.0035	2.45593	0.0483	Klk1b1	kallikrein 1-related peptidase b1	Coding
TC0X00001881.mm.1	11.73	13.31	-2.98	0.33557	-1.57531	0.0191	1.71897	0.1327	Gm25202	predicted gene, 25202 [Source:MGI Symbol;Acc:MGI:5454979]	Small_RNA
TC0400002359.mm.1	9.6	11.18	-2.98	0.33557	-1.57531	0.031	1.50864	0.1747	Gm26254	predicted gene, 26254 [Source:MGI Symbol;Acc:MGI:5456031]	Small_RNA
TC0X00001907.mm.1	7.37	8.95	-2.98	0.33557	-1.57531	0.0097	2.01323	0.0889	n-R5s5	nuclear encoded rRNA 5S 5 [Source:MGI Symbol;Acc:MGI:4421739]	Ribosomal
TC0700004156.mm.1	6.35	7.93	-2.98	0.33557	-1.57531	0.0464	1.33348	0.2178	Snord14a	small nucleolar RNA, C/D box 14A	Small_RNA
TC0100000458.mm.1	9.04	10.61	-2.97	0.3367	-1.57046	0.0268	1.57187	0.1612	Gm26293	predicted gene, 26293 [Source:MGI Symbol;Acc:MGI:5456070]	Small_RNA
TC0800003106.mm.1	13.57	15.12	-2.94	0.340136	-1.55582	0.0243	1.61439	0.1522	n-R5s102	nuclear encoded rRNA 5S 102 [Source:MGI Symbol;Acc:MGI:4421950]	Ribosomal
TC1600001338.mm.1	13.3	14.86	-2.94	0.340136	-1.55582	0.0456	1.34104	0.2158	Mir684-1; Gm10241	microRNA 684-1; predicted pseudogene 10241	Multiple_Complex
TC0X00001120.mm.1	7.28	8.84	-2.94	0.340136	-1.55582	0.004	2.39794	0.0529	Tex16	testis expressed gene 16	Coding
TC1100003479.mm.1	14.08	15.63	-2.93	0.341297	-1.5509	0.0448	1.34872	0.2137	Gm23137	predicted gene, 23137 [Source:MGI Symbol;Acc:MGI:5452914]	Small_RNA
TC1200000093.mm.1	5.14	6.69	-2.92	0.342466	-1.54597	0.0448	1.34872	0.2138	Rad51ap2	RAD51 associated protein 2	Coding
TC1700002250.mm.1	12.24	13.78	-2.91	0.343643	-1.54102	0.0002	3.69897	0.0083	Dazl	deleted in azoospermia-like; deleted in azoospermia-like (Dazl), mRNA.	Coding
TC0100001913.mm.1	9.02	10.56	-2.9	0.344828	-1.53605	0.0091	2.04096	0.0862	Gm6104	predicted gene 6104 [Source:MGI Symbol;Acc:MGI:3648587]	Coding
TC1000002662.mm.1	12.31	13.85	-2.9	0.344828	-1.53605	0.021	1.67778	0.1394	Gm26180	predicted gene, 26180 [Source:MGI Symbol;Acc:MGI:5455957]	Small_RNA
TC1000002660.mm.1	10.18	11.71	-2.89	0.346021	-1.53107	0.0491	1.30892	0.225	Actr6	ARP6 actin-related protein 6	Coding
TC0200005373.mm.1	9.2	10.74	-2.89	0.346021	-1.53107	0.0488	1.31158	0.2242	Gm14325	predicted gene 14325	Multiple_Complex
TC1400001666.mm.1	14.98	16.51	-2.89	0.346021	-1.53107	0.0082	2.08619	0.0808	Snord69	small nucleolar RNA, C/D box 69	Small_RNA
TC0700000786.mm.1	8.14	9.67	-2.89	0.346021	-1.53107	0.0055	2.25964	0.0641	Klk1b11	kallikrein 1-related peptidase b11	Coding
TC1100001021.mm.1	9.18	10.71	-2.89	0.346021	-1.53107	0.0105	1.97881	0.0935	Spata22; Olfr20	spermatogenesis associated 22; olfactory receptor 20	Coding
TC0800000849.mm.1	10.71	12.24	-2.89	0.346021	-1.53107	0.0267	1.57349	0.1608	Gm7984	predicted gene 7984 [Source:MGI Symbol;Acc:MGI:3645839]	Pseudogene
TC1500000853.mm.1	13.29	14.82	-2.89	0.346021	-1.53107	0.0482	1.31695	0.2229	Gm23144	predicted gene, 23144 [Source:MGI Symbol;Acc:MGI:5452921]	Small_RNA
TC0100002953.mm.1	8.99	10.52	-2.88	0.347222	-1.52607	0.0332	1.47886	0.1817			NonCoding
TC1300001640.mm.1	12.99	14.51	-2.87	0.348432	-1.52105	0.0045	2.34679	0.0568	Hist1h4c	histone cluster 1, H4c	Coding
TC0300002528.mm.1	5.3	6.82	-2.87	0.348432	-1.52105	0.0032	2.49485	0.046	Gm22581	predicted gene, 22581 [Source:MGI Symbol;Acc:MGI:5452358]	Small_RNA
TC0200003842.mm.1	14.21	15.73	-2.87	0.348432	-1.52105	0.015	1.82391	0.1163	Gm13690	predicted gene 13690	Pseudogene
TC0200002768.mm.1	9.25	10.77	-2.87	0.348432	-1.52105	0.0211	1.67572	0.1395	Gm14292	predicted gene 14292 [Source:MGI Symbol;Acc:MGI:3649964]	Pseudogene
TC0200000658.mm.1	9.48	10.99	-2.85	0.350877	-1.51096	0.0475	1.32331	0.2208	Mir684-1; Gm13430	microRNA 684-1 (Mir684-1), microRNA.; predicted gene 13430; microRNA 684-1	Multiple_Complex
TC0100003696.mm.1	12.68	14.18	-2.84	0.352113	-1.50589	0.045	1.34679	0.2143	Gm23690	predicted gene, 23690 [Source:MGI Symbol;Acc:MGI:5453467]	Small_RNA
TC0400001284.mm.1	11.81	13.31	-2.84	0.352113	-1.50589	0.003	2.52288	0.044	Gm23287	predicted gene, 23287 [Source:MGI Symbol;Acc:MGI:5453064]	Small_RNA
TC0X00001866.mm.1	6.54	8.04	-2.84	0.352113	-1.50589	0.0194	1.7122	0.1336	n-R5s3	nuclear encoded rRNA 5S 3 [Source:MGI Symbol;Acc:MGI:4421737]	Ribosomal
TC0400003923.mm.1	7.5	9	-2.83	0.353357	-1.5008	0.0467	1.33068	0.2188	Gm13080	predicted gene 13080 [Source:MGI Symbol;Acc:MGI:3650235]	Multiple_Complex
TC1300001941.mm.1	9.06	10.56	-2.82	0.35461	-1.4957	0.0318	1.49757	0.1773	Mirlet7d	microRNA let7d	Multiple_Complex
TC0900000329.mm.1	9.29	10.78	-2.82	0.35461	-1.4957	0.0061	2.21467	0.0679	Gm24262	predicted gene, 24262 [Source:MGI Symbol;Acc:MGI:5454039]	Small_RNA
TC0400002425.mm.1	11.36	12.86	-2.82	0.35461	-1.4957	0.0323	1.4908	0.179	Gm25581	predicted gene, 25581 [Source:MGI Symbol;Acc:MGI:5455358]	Small_RNA
TC1300001201.mm.1	6.77	8.25	-2.8	0.357143	-1.48543	0.032	1.49485	0.178	Smim15	small integral membrane protein 15	Multiple_Complex
TC1400002260.mm.1	7.59	9.07	-2.8	0.357143	-1.48543	0.0018	2.74473	0.0315	Esco2	establishment of cohesion 1 homolog 2 (S. cerevisiae)	Multiple_Complex
TC1600000931.mm.1	12.21	13.69	-2.8	0.357143	-1.48543	0.0436	1.36051	0.2107	Gm24508	predicted gene, 24508 [Source:MGI Symbol;Acc:MGI:5454285]	Small_RNA
TC1700000353.mm.1	9.03	10.51	-2.8	0.357143	-1.48543	0.001	3	0.0215	Meiob	meiosis specific with OB domains	Coding
TC1300001076.mm.1	11.38	12.86	-2.8	0.357143	-1.48543	0.0243	1.61439	0.1521	Snora47	small nucleolar RNA, H/ACA box 47	Multiple_Complex
TC0100000008.mm.1	13.18	14.66	-2.79	0.358423	-1.48027	0.0374	1.42713	0.1929	Gm22307	predicted gene, 22307 [Source:MGI Symbol;Acc:MGI:5452084]	Small_RNA
TC1100000383.mm.1	9.35	10.83	-2.79	0.358423	-1.48027	0.0022	2.65758	0.0364	Pank3	pantothenate kinase 3	Multiple_Complex
TC0100001988.mm.1	14.37	15.84	-2.78	0.359712	-1.47508	0.0146	1.83565	0.1144	Smt3h2-ps4	SMT3 suppressor of mif two 3 homolog 2, pseudogene 4 (S. cerevisiae)	Pseudogene
TC0900002333.mm.1	8.62	10.09	-2.78	0.359712	-1.47508	0.0293	1.53313	0.1692	Etfa	electron transferring flavoprotein, alpha polypeptide	Multiple_Complex
TC1100003212.mm.1	13.28	14.75	-2.78	0.359712	-1.47508	0.016	1.79588	0.1202	Gm12335	predicted gene 12335 [Source:MGI Symbol;Acc:MGI:3650727]	Pseudogene
TC0200002231.mm.1	10.65	12.12	-2.78	0.359712	-1.47508	0.0173	1.76195	0.1254	Gm23598	predicted gene, 23598 [Source:MGI Symbol;Acc:MGI:5453375]	Small_RNA
TC1700000199.mm.1	8.83	10.3	-2.77	0.361011	-1.46989	0.0276	1.55909	0.1638	Gm6712	PREDICTED: predicted gene 6712 (Gm6712), miscRNA.	Multiple_Complex
TC0600000536.mm.1	15.85	17.32	-2.76	0.362319	-1.46467	0.0154	1.81248	0.1182	Rny3	RNA, Y3 small cytoplasmic (associated with Ro protein)	NonCoding
TSUnmapped00000180.mm.1	15.85	17.32	-2.76	0.362319	-1.46467	0.0154	1.81248	0.1182	Rny3	RNA, Y3 small cytoplasmic (associated with Ro protein)	Small_RNA
TC0600000134.mm.1	8.62	10.08	-2.76	0.362319	-1.46467	0.0451	1.34582	0.2145	Capza2	capping protein (actin filament) muscle Z-line, alpha 2	Multiple_Complex
TC1200002099.mm.1	6.82	8.29	-2.75	0.363636	-1.45943	0.0292	1.53462	0.1689	n-R5s64	nuclear encoded rRNA 5S 64 [Source:MGI Symbol;Acc:MGI:4421909]	Ribosomal
TC1100001264.mm.1	5.65	7.11	-2.75	0.363636	-1.45943	0.0031	2.50864	0.0454	Wfdc17	WAP four-disulfide core domain 17	Coding
TC1700001139.mm.1	4.72	6.18	-2.75	0.363636	-1.45943	0.0452	1.34486	0.2148	Snord92	small nucleolar RNA, C/D box 92	Small_RNA
TC0500000047.mm.1	6.59	8.05	-2.75	0.363636	-1.45943	0.0089	2.05061	0.0849	Gm23993	predicted gene, 23993 [Source:MGI Symbol;Acc:MGI:5453770]	Small_RNA
TC0X00001206.mm.1	8.81	10.27	-2.74	0.364964	-1.45418	0.0164	1.78516	0.1219	Gm2411	PREDICTED: predicted gene 2411 (Gm2411), mRNA.	Coding
TC0900001598.mm.1	6.14	7.6	-2.74	0.364964	-1.45418	0.0117	1.93181	0.0999	Snora62	small nucleolar RNA, H/ACA box 62	Small_RNA
TC0500000230.mm.1	7.62	9.07	-2.74	0.364964	-1.45418	0.0358	1.44612	0.1893	Hspe1-ps3	heat shock protein 1 (chaperonin 10), pseudogene 3	Multiple_Complex
TSUnmapped00000139.mm.1	16.67	18.13	-2.74	0.364964	-1.45418	0.0159	1.7986	0.1196	n-R5s149	nuclear encoded rRNA 5S 149	Ribosomal
TSUnmapped00000140.mm.1	16.67	18.13	-2.74	0.364964	-1.45418	0.0159	1.7986	0.1196	Gm23284	predicted gene, 23284	Ribosomal
TSUnmapped00000141.mm.1	16.67	18.13	-2.74	0.364964	-1.45418	0.0159	1.7986	0.1196	Gm22291	predicted gene, 22291	Ribosomal
TSUnmapped00000142.mm.1	16.67	18.13	-2.74	0.364964	-1.45418	0.0159	1.7986	0.1196	n-R5s146	nuclear encoded rRNA 5S 146	Ribosomal
TSUnmapped00000143.mm.1	16.67	18.13	-2.74	0.364964	-1.45418	0.0159	1.7986	0.1196	Gm25212	predicted gene, 25212	Ribosomal
TSUnmapped00000144.mm.1	16.67	18.13	-2.74	0.364964	-1.45418	0.0159	1.7986	0.1196	n-R5s144	nuclear encoded rRNA 5S 144	Ribosomal
TSUnmapped00000145.mm.1	16.67	18.13	-2.74	0.364964	-1.45418	0.0159	1.7986	0.1196	n-R5s143	nuclear encoded rRNA 5S 143	Ribosomal
TSUnmapped00000146.mm.1	16.67	18.13	-2.74	0.364964	-1.45418	0.0159	1.7986	0.1196	n-R5s142	nuclear encoded rRNA 5S 142	Ribosomal
TSUnmapped00000147.mm.1	16.67	18.13	-2.74	0.364964	-1.45418	0.0159	1.7986	0.1196	n-R5s141	nuclear encoded rRNA 5S 141	Ribosomal
TSUnmapped00000148.mm.1	16.67	18.13	-2.74	0.364964	-1.45418	0.0159	1.7986	0.1196	Gm22109	predicted gene, 22109	Ribosomal
TSUnmapped00000149.mm.1	16.67	18.13	-2.74	0.364964	-1.45418	0.0159	1.7986	0.1196	n-R5s139	nuclear encoded rRNA 5S 139	Ribosomal
TSUnmapped00000150.mm.1	16.67	18.13	-2.74	0.364964	-1.45418	0.0159	1.7986	0.1196	n-R5s138	nuclear encoded rRNA 5S 138	Ribosomal
TSUnmapped00000151.mm.1	16.67	18.13	-2.74	0.364964	-1.45418	0.0159	1.7986	0.1196	n-R5s134	nuclear encoded rRNA 5S 134	Ribosomal
TSUnmapped00000152.mm.1	16.67	18.13	-2.74	0.364964	-1.45418	0.0159	1.7986	0.1196	n-R5s133	nuclear encoded rRNA 5S 133	Ribosomal
TSUnmapped00000153.mm.1	16.67	18.13	-2.74	0.364964	-1.45418	0.0159	1.7986	0.1196	Gm26391	predicted gene, 26391	Ribosomal
TSUnmapped00000154.mm.1	16.67	18.13	-2.74	0.364964	-1.45418	0.0159	1.7986	0.1196	n-R5s128	nuclear encoded rRNA 5S 128	Ribosomal
TSUnmapped00000155.mm.1	16.67	18.13	-2.74	0.364964	-1.45418	0.0159	1.7986	0.1196	n-R5s124	nuclear encoded rRNA 5S 124	Ribosomal
TSUnmapped00000156.mm.1	16.67	18.13	-2.74	0.364964	-1.45418	0.0159	1.7986	0.1196	n-R5s123	nuclear encoded rRNA 5S 123	Ribosomal
TSUnmapped00000157.mm.1	16.67	18.13	-2.74	0.364964	-1.45418	0.0159	1.7986	0.1196	n-R5s122	nuclear encoded rRNA 5S 122	Ribosomal
TSUnmapped00000158.mm.1	16.67	18.13	-2.74	0.364964	-1.45418	0.0159	1.7986	0.1196	n-R5s121	nuclear encoded rRNA 5S 121	Ribosomal
TSUnmapped00000159.mm.1	16.67	18.13	-2.74	0.364964	-1.45418	0.0159	1.7986	0.1196	n-R5s117	nuclear encoded rRNA 5S 117	Ribosomal
TSUnmapped00000160.mm.1	16.67	18.13	-2.74	0.364964	-1.45418	0.0159	1.7986	0.1196	Gm25018	predicted gene, 25018	Ribosomal
TSUnmapped00000161.mm.1	16.67	18.13	-2.74	0.364964	-1.45418	0.0159	1.7986	0.1196	n-R5s113	nuclear encoded rRNA 5S 113	Ribosomal
TSUnmapped00000162.mm.1	16.67	18.13	-2.74	0.364964	-1.45418	0.0159	1.7986	0.1196	n-R5s111	nuclear encoded rRNA 5S 111	Ribosomal
TSUnmapped00000163.mm.1	16.67	18.13	-2.74	0.364964	-1.45418	0.0159	1.7986	0.1196	n-R5s110	nuclear encoded rRNA 5S 110	Ribosomal
TSUnmapped00000164.mm.1	16.67	18.13	-2.74	0.364964	-1.45418	0.0159	1.7986	0.1196	n-R5s108	nuclear encoded rRNA 5S 108	Ribosomal
TSUnmapped00000165.mm.1	16.67	18.13	-2.74	0.364964	-1.45418	0.0159	1.7986	0.1196	n-R5s105	nuclear encoded rRNA 5S 105	Ribosomal
TSUnmapped00000166.mm.1	16.67	18.13	-2.74	0.364964	-1.45418	0.0159	1.7986	0.1196	n-R5s104	nuclear encoded rRNA 5S 104	Ribosomal
TSUnmapped00000167.mm.1	16.67	18.13	-2.74	0.364964	-1.45418	0.0159	1.7986	0.1196	n-R5s103	nuclear encoded rRNA 5S 103	Ribosomal
TSUnmapped00000168.mm.1	16.67	18.13	-2.74	0.364964	-1.45418	0.0159	1.7986	0.1196	n-R5s100	nuclear encoded rRNA 5S 100	Ribosomal
TSUnmapped00000174.mm.1	16.67	18.13	-2.74	0.364964	-1.45418	0.0159	1.7986	0.1196	Rn5s	5S RNA	Ribosomal
TC0600002015.mm.1	14.56	16.01	-2.73	0.3663	-1.4489	0.0286	1.54363	0.1669	Gm13835	predicted gene 13835	Pseudogene
TC0800003110.mm.1	15.62	17.07	-2.73	0.3663	-1.4489	0.0102	1.9914	0.0917	n-R5s106	nuclear encoded rRNA 5S 106 [Source:MGI Symbol;Acc:MGI:4421954]	Ribosomal
TC0800003122.mm.1	15.62	17.07	-2.73	0.3663	-1.4489	0.0102	1.9914	0.0917	n-R5s118	nuclear encoded rRNA 5S 118 [Source:MGI Symbol;Acc:MGI:4421968]	Ribosomal
TC0800003130.mm.1	15.62	17.07	-2.73	0.3663	-1.4489	0.0102	1.9914	0.0917	Gm24312	predicted gene, 24312 [Source:MGI Symbol;Acc:MGI:5454089]	Ribosomal
TC0800003134.mm.1	15.62	17.07	-2.73	0.3663	-1.4489	0.0102	1.9914	0.0917	n-R5s130	nuclear encoded rRNA 5S 130 [Source:MGI Symbol;Acc:MGI:4421986]	Ribosomal
TC0100000285.mm.1	9.99	11.44	-2.72	0.367647	-1.44361	0.017	1.76955	0.1245	Gm24826	predicted gene, 24826 [Source:MGI Symbol;Acc:MGI:5454603]	Multiple_Complex
TC0300002331.mm.1	14.4	15.84	-2.72	0.367647	-1.44361	0.0348	1.45842	0.1862	Gm26465	predicted gene, 26465 [Source:MGI Symbol;Acc:MGI:5456242]	Small_RNA
TC0600000130.mm.1	14.4	15.84	-2.72	0.367647	-1.44361	0.0348	1.45842	0.1862	Gm25021	predicted gene, 25021 [Source:MGI Symbol;Acc:MGI:5454798]	Small_RNA
TC0900002769.mm.1	14.4	15.84	-2.72	0.367647	-1.44361	0.0348	1.45842	0.1862	Gm24864	predicted gene, 24864	Small_RNA
TC1400002056.mm.1	14.4	15.84	-2.72	0.367647	-1.44361	0.0348	1.45842	0.1862	Gm24424	predicted gene, 24424 [Source:MGI Symbol;Acc:MGI:5454201]	Small_RNA
TC1700001921.mm.1	14.4	15.84	-2.72	0.367647	-1.44361	0.0348	1.45842	0.1862	Gm24389	predicted gene, 24389 [Source:MGI Symbol;Acc:MGI:5454166]	Small_RNA
TC0X00001316.mm.1	7.45	8.89	-2.71	0.369004	-1.43829	0.004	2.39794	0.0528	Arxes2	adipocyte-related X-chromosome expressed sequence 2	Coding
TC0300000677.mm.1	7.27	8.71	-2.71	0.369004	-1.43829	0.0071	2.14874	0.075	Gm25188	predicted gene, 25188 [Source:MGI Symbol;Acc:MGI:5454965]	Small_RNA
TC0X00000732.mm.1	6.83	8.27	-2.71	0.369004	-1.43829	0.0188	1.72584	0.1318	Xlr4e-ps	X-linked lymphocyte-regulated 4E, pseudogene	Pseudogene
TC0800003104.mm.1	16.59	18.03	-2.71	0.369004	-1.43829	0.0189	1.72354	0.1318	n-R5s100	nuclear encoded rRNA 5S 100	Ribosomal
TC0800003107.mm.1	16.59	18.03	-2.71	0.369004	-1.43829	0.0189	1.72354	0.1318	n-R5s103	nuclear encoded rRNA 5S 103	Ribosomal
TC0800003108.mm.1	16.59	18.03	-2.71	0.369004	-1.43829	0.0189	1.72354	0.1318	n-R5s104	nuclear encoded rRNA 5S 104	Ribosomal
TC0800003109.mm.1	16.59	18.03	-2.71	0.369004	-1.43829	0.0189	1.72354	0.1318	n-R5s105	nuclear encoded rRNA 5S 105	Ribosomal
TC0800003111.mm.1	16.59	18.03	-2.71	0.369004	-1.43829	0.0189	1.72354	0.1318	n-R5s107	nuclear encoded rRNA 5S 107 [Source:MGI Symbol;Acc:MGI:4421955]	Ribosomal
TC0800003112.mm.1	16.59	18.03	-2.71	0.369004	-1.43829	0.0189	1.72354	0.1318	n-R5s108	nuclear encoded rRNA 5S 108	Ribosomal
TC0800003114.mm.1	16.59	18.03	-2.71	0.369004	-1.43829	0.0189	1.72354	0.1318	n-R5s110	nuclear encoded rRNA 5S 110	Ribosomal
TC0800003115.mm.1	16.59	18.03	-2.71	0.369004	-1.43829	0.0189	1.72354	0.1318	n-R5s111	nuclear encoded rRNA 5S 111	Ribosomal
TC0800003117.mm.1	16.59	18.03	-2.71	0.369004	-1.43829	0.0189	1.72354	0.1318	n-R5s113	nuclear encoded rRNA 5S 113	Ribosomal
TC0800003120.mm.1	16.59	18.03	-2.71	0.369004	-1.43829	0.0189	1.72354	0.1318	Gm25018; Rn5s10	predicted gene, 25018 [Source:MGI Symbol;Acc:MGI:5454795]; 5S RNA 10 (Rn5s10), ribosomal RNA.	Ribosomal
TC0800003121.mm.1	16.59	18.03	-2.71	0.369004	-1.43829	0.0189	1.72354	0.1318	n-R5s117	nuclear encoded rRNA 5S 117	Ribosomal
TC0800003125.mm.1	16.59	18.03	-2.71	0.369004	-1.43829	0.0189	1.72354	0.1318	n-R5s121	nuclear encoded rRNA 5S 121	Ribosomal
TC0800003126.mm.1	16.59	18.03	-2.71	0.369004	-1.43829	0.0189	1.72354	0.1318	n-R5s122	nuclear encoded rRNA 5S 122	Ribosomal
TC0800003127.mm.1	16.59	18.03	-2.71	0.369004	-1.43829	0.0189	1.72354	0.1318	n-R5s123	nuclear encoded rRNA 5S 123	Ribosomal
TC0800003128.mm.1	16.59	18.03	-2.71	0.369004	-1.43829	0.0189	1.72354	0.1318	n-R5s124	nuclear encoded rRNA 5S 124	Ribosomal
TC0800003132.mm.1	16.59	18.03	-2.71	0.369004	-1.43829	0.0189	1.72354	0.1318	n-R5s128	nuclear encoded rRNA 5S 128	Ribosomal
TC0800003136.mm.1	16.59	18.03	-2.71	0.369004	-1.43829	0.0189	1.72354	0.1318	Gm26391; Rn5s17	predicted gene, 26391 [Source:MGI Symbol;Acc:MGI:5456168]; 5S RNA 17 (Rn5s17), ribosomal RNA.	Ribosomal
TC0800003137.mm.1	16.59	18.03	-2.71	0.369004	-1.43829	0.0189	1.72354	0.1318	n-R5s133	nuclear encoded rRNA 5S 133	Ribosomal
TC0800003138.mm.1	16.59	18.03	-2.71	0.369004	-1.43829	0.0189	1.72354	0.1318	n-R5s134	nuclear encoded rRNA 5S 134	Ribosomal
TC0800003139.mm.1	16.59	18.03	-2.71	0.369004	-1.43829	0.0189	1.72354	0.1318	Rn5s	5S RNA	Ribosomal
TC0800003142.mm.1	16.59	18.03	-2.71	0.369004	-1.43829	0.0189	1.72354	0.1318	n-R5s138	nuclear encoded rRNA 5S 138	Ribosomal
TC0800003143.mm.1	16.59	18.03	-2.71	0.369004	-1.43829	0.0189	1.72354	0.1318	n-R5s139	nuclear encoded rRNA 5S 139	Ribosomal
TC0800003144.mm.1	16.59	18.03	-2.71	0.369004	-1.43829	0.0189	1.72354	0.1318	Gm22109; Rn5s23	predicted gene, 22109 [Source:MGI Symbol;Acc:MGI:5451886]; 5S RNA 23 (Rn5s23), ribosomal RNA.	Ribosomal
TC0800003145.mm.1	16.59	18.03	-2.71	0.369004	-1.43829	0.0189	1.72354	0.1318	n-R5s141	nuclear encoded rRNA 5S 141	Ribosomal
TC0800003146.mm.1	16.59	18.03	-2.71	0.369004	-1.43829	0.0189	1.72354	0.1318	n-R5s142	nuclear encoded rRNA 5S 142	Ribosomal
TC0800003147.mm.1	16.59	18.03	-2.71	0.369004	-1.43829	0.0189	1.72354	0.1318	n-R5s143	nuclear encoded rRNA 5S 143	Ribosomal
TC0800003148.mm.1	16.59	18.03	-2.71	0.369004	-1.43829	0.0189	1.72354	0.1318	n-R5s144	nuclear encoded rRNA 5S 144	Ribosomal
TC0800003149.mm.1	16.59	18.03	-2.71	0.369004	-1.43829	0.0189	1.72354	0.1318	Gm25212; Rn5s28	predicted gene, 25212 [Source:MGI Symbol;Acc:MGI:5454989]; 5S RNA 28 (Rn5s28), ribosomal RNA.	Ribosomal
TC0800003150.mm.1	16.59	18.03	-2.71	0.369004	-1.43829	0.0189	1.72354	0.1318	n-R5s146	nuclear encoded rRNA 5S 146	Ribosomal
TC0800003151.mm.1	16.59	18.03	-2.71	0.369004	-1.43829	0.0189	1.72354	0.1318	Gm22291; Rn5s30	predicted gene, 22291 [Source:MGI Symbol;Acc:MGI:5452068]; 5S RNA 30 (Rn5s30), ribosomal RNA.	Ribosomal
TC0800003152.mm.1	16.59	18.03	-2.71	0.369004	-1.43829	0.0189	1.72354	0.1318	Gm23284; Rn5s31	predicted gene, 23284 [Source:MGI Symbol;Acc:MGI:5453061]; 5S RNA 31 (Rn5s31), ribosomal RNA.	Ribosomal
TC0800003153.mm.1	16.59	18.03	-2.71	0.369004	-1.43829	0.0189	1.72354	0.1318	n-R5s149	nuclear encoded rRNA 5S 149	Ribosomal
TC0500001647.mm.1	4.62	6.05	-2.7	0.37037	-1.43296	0.043	1.36653	0.2091	Gm22956	predicted gene, 22956 [Source:MGI Symbol;Acc:MGI:5452733]	Small_RNA
TC0X00001623.mm.1	6.91	8.35	-2.7	0.37037	-1.43296	0.0019	2.72125	0.0327			NonCoding
TC1100001481.mm.1	12.43	13.86	-2.7	0.37037	-1.43296	0.0128	1.89279	0.1058	Gm24949	predicted gene, 24949 [Source:MGI Symbol;Acc:MGI:5454726]	Multiple_Complex
TC1400000130.mm.1	8.68	10.11	-2.69	0.371747	-1.42761	5.03e-05	4.29843	0.003	Top2b	topoisomerase (DNA) II beta	Multiple_Complex
TC0X00000488.mm.1	12.58	14.01	-2.69	0.371747	-1.42761	0.0426	1.37059	0.208	Gm22550	predicted gene, 22550 [Source:MGI Symbol;Acc:MGI:5452327]	Small_RNA
TC1100000959.mm.1	10.8	12.23	-2.69	0.371747	-1.42761	0.0045	2.34679	0.0566	4930544D05Rik	RIKEN cDNA 4930544D05 gene	Multiple_Complex
TC0200001525.mm.1	10.55	11.98	-2.69	0.371747	-1.42761	0.0492	1.30803	0.225	Gm23731	predicted gene, 23731 [Source:MGI Symbol;Acc:MGI:5453508]	Small_RNA
TC0X00000724.mm.1	7.12	8.55	-2.69	0.371747	-1.42761	0.0193	1.71444	0.1335	Xlr4d-ps	X-linked lymphocyte-regulated 4D, pseudogene	Pseudogene
TC1600001489.mm.1	15.42	16.85	-2.69	0.371747	-1.42761	0.0062	2.20761	0.0684	Gm24879	predicted gene, 24879 [Source:MGI Symbol;Acc:MGI:5454656]	Small_RNA
TC1600001504.mm.1	10.47	11.9	-2.69	0.371747	-1.42761	0.0137	1.86328	0.1102	Gm25848	predicted gene, 25848 [Source:MGI Symbol;Acc:MGI:5455625]	Small_RNA
TC1900000582.mm.1	8.28	9.71	-2.68	0.373134	-1.42223	0.0122	1.91364	0.1022	Zfp518a; Mir8092	zinc finger protein 518A; microRNA 8092; zinc finger protein 518A (Zfp518a), mRNA.	Multiple_Complex
TC1900000560.mm.1	8.44	9.86	-2.68	0.373134	-1.42223	0.0165	1.78252	0.1223	Hells	helicase, lymphoid specific	Multiple_Complex
TC0200000684.mm.1	13.79	15.21	-2.67	0.374532	-1.41684	0.037	1.4318	0.1917	Gm22306	predicted gene, 22306 [Source:MGI Symbol;Acc:MGI:5452083]	Small_RNA
TC1400002521.mm.1	12.72	14.14	-2.67	0.374532	-1.41684	0.0486	1.31336	0.224	Rps3a2	ribosomal protein S3A2 [Source:MGI Symbol;Acc:MGI:3642853]	Coding
TC1700000194.mm.1	10.22	11.64	-2.67	0.374532	-1.41684	0.0109	1.96257	0.0955	Zfp960	zinc finger protein 960	Coding
TC0X00000570.mm.1	12.56	13.97	-2.67	0.374532	-1.41684	0.0424	1.37263	0.2073	Gm25412	predicted gene, 25412 [Source:MGI Symbol;Acc:MGI:5455189]	Small_RNA
TC0500001331.mm.1	7.74	9.15	-2.66	0.37594	-1.41143	0.0297	1.52724	0.1707	n-R5s176	nuclear encoded rRNA 5S 176 [Source:MGI Symbol;Acc:MGI:4422041]	Ribosomal
TSUnmapped00000138.mm.1	15.57	16.98	-2.66	0.37594	-1.41143	0.0384	1.41567	0.1959	n-R5s136	nuclear encoded rRNA 5S 136	Ribosomal
TC1900000901.mm.1	12.23	13.64	-2.66	0.37594	-1.41143	0.0169	1.77211	0.1237	Gm23927	predicted gene, 23927 [Source:MGI Symbol;Acc:MGI:5453704]	Multiple_Complex
TC0900002506.mm.1	9.37	10.78	-2.66	0.37594	-1.41143	0.0107	1.97062	0.0947	Rnu5g	RNA, U5G small nuclear	Small_RNA
TSUnmapped00000170.mm.1	9.37	10.78	-2.66	0.37594	-1.41143	0.0107	1.97062	0.0947	Rnu5g	RNA, U5G small nuclear	Small_RNA
TC1100002244.mm.1	13.23	14.64	-2.65	0.377358	-1.40599	0.0385	1.41454	0.1962	Gm25698	predicted gene, 25698 [Source:MGI Symbol;Acc:MGI:5455475]	Small_RNA
TC0700003469.mm.1	14.44	15.85	-2.65	0.377358	-1.40599	0.0305	1.5157	0.1731	Gm23815	predicted gene, 23815 [Source:MGI Symbol;Acc:MGI:5453592]	Small_RNA
TC0800003140.mm.1	15.58	16.99	-2.65	0.377358	-1.40599	0.0396	1.4023	0.1992	n-R5s136	nuclear encoded rRNA 5S 136	Ribosomal
TC0300001811.mm.1	8.48	9.89	-2.64	0.378788	-1.40054	0.0294	1.53165	0.1696	Gm24780	predicted gene, 24780 [Source:MGI Symbol;Acc:MGI:5454557]	Small_RNA
TC0500000209.mm.1	14.35	15.75	-2.63	0.380228	-1.39506	0.0357	1.44733	0.1891	Gm9836	predicted pseudogene 9836 [Source:MGI Symbol;Acc:MGI:3642194]	Multiple_Complex
TC0800003113.mm.1	14.42	15.81	-2.63	0.380228	-1.39506	0.0097	2.01323	0.0888	n-R5s109	nuclear encoded rRNA 5S 109 [Source:MGI Symbol;Acc:MGI:4421957]	Ribosomal
TC0500003661.mm.1	9.14	10.53	-2.62	0.381679	-1.38957	0.0409	1.38828	0.2027	Gm5566	predicted pseudogene 5566	Pseudogene
TC1300001492.mm.1	13.3	14.69	-2.62	0.381679	-1.38957	0.0206	1.68613	0.138	Gm22628	predicted gene, 22628 [Source:MGI Symbol;Acc:MGI:5452405]	Small_RNA
TC0600001835.mm.1	12.9	14.29	-2.62	0.381679	-1.38957	0.0205	1.68825	0.1376	Gm22155	predicted gene, 22155 [Source:MGI Symbol;Acc:MGI:5451932]	Small_RNA
TC1500000751.mm.1	8.53	9.92	-2.61	0.383142	-1.38405	0.0448	1.34872	0.2138	n-R5s41	nuclear encoded rRNA 5S 41 [Source:MGI Symbol;Acc:MGI:4421886]	Ribosomal
TC0X00001462.mm.1	6.35	7.73	-2.61	0.383142	-1.38405	0.0209	1.67985	0.1389	Gm8289	predicted gene 8289 [Source:MGI Symbol;Acc:MGI:3645453]	Pseudogene
TC0100000691.mm.1	14.76	16.14	-2.61	0.383142	-1.38405	0.0363	1.44009	0.1898	Gm23934	predicted gene, 23934 [Source:MGI Symbol;Acc:MGI:5453711]	Small_RNA
TC0100001549.mm.1	14.76	16.14	-2.61	0.383142	-1.38405	0.0363	1.44009	0.1898	Gm24182	predicted gene, 24182 [Source:MGI Symbol;Acc:MGI:5453959]	Small_RNA
TC0100002347.mm.1	14.76	16.14	-2.61	0.383142	-1.38405	0.0363	1.44009	0.1898	Gm25829	predicted gene, 25829 [Source:MGI Symbol;Acc:MGI:5455606]	Small_RNA
TC0100002849.mm.1	14.76	16.14	-2.61	0.383142	-1.38405	0.0363	1.44009	0.1898	Gm22360	predicted gene, 22360 [Source:MGI Symbol;Acc:MGI:5452137]	Small_RNA
TC0200002116.mm.1	14.76	16.14	-2.61	0.383142	-1.38405	0.0363	1.44009	0.1898	Gm25583	predicted gene, 25583 [Source:MGI Symbol;Acc:MGI:5455360]	Small_RNA
TC0200004534.mm.1	14.76	16.14	-2.61	0.383142	-1.38405	0.0363	1.44009	0.1898	Gm26496	predicted gene, 26496 [Source:MGI Symbol;Acc:MGI:5456273]	Small_RNA
TC0300000539.mm.1	14.76	16.14	-2.61	0.383142	-1.38405	0.0363	1.44009	0.1898	Gm22295	predicted gene, 22295 [Source:MGI Symbol;Acc:MGI:5452072]	Small_RNA
TC0300001052.mm.1	14.76	16.14	-2.61	0.383142	-1.38405	0.0363	1.44009	0.1898	Gm25869	predicted gene, 25869 [Source:MGI Symbol;Acc:MGI:5455646]	Small_RNA
TC0300001319.mm.1	14.76	16.14	-2.61	0.383142	-1.38405	0.0363	1.44009	0.1898	Gm22682	predicted gene, 22682 [Source:MGI Symbol;Acc:MGI:5452459]	Small_RNA
TC0300001510.mm.1	14.76	16.14	-2.61	0.383142	-1.38405	0.0363	1.44009	0.1898	Gm25127	predicted gene, 25127 [Source:MGI Symbol;Acc:MGI:5454904]	Small_RNA
TC0300001522.mm.1	14.76	16.14	-2.61	0.383142	-1.38405	0.0363	1.44009	0.1898	Gm24458	predicted gene, 24458 [Source:MGI Symbol;Acc:MGI:5454235]	Small_RNA
TC0300001975.mm.1	14.76	16.14	-2.61	0.383142	-1.38405	0.0363	1.44009	0.1898	Gm22798	predicted gene, 22798 [Source:MGI Symbol;Acc:MGI:5452575]	Small_RNA
TC0300003030.mm.1	14.76	16.14	-2.61	0.383142	-1.38405	0.0363	1.44009	0.1898	Gm24260	predicted gene, 24260 [Source:MGI Symbol;Acc:MGI:5454037]	Small_RNA
TC0400000147.mm.1	14.76	16.14	-2.61	0.383142	-1.38405	0.0363	1.44009	0.1898	Gm24978	predicted gene, 24978 [Source:MGI Symbol;Acc:MGI:5454755]	Small_RNA
TC0400003244.mm.1	14.76	16.14	-2.61	0.383142	-1.38405	0.0363	1.44009	0.1898	Gm24967	predicted gene, 24967 [Source:MGI Symbol;Acc:MGI:5454744]	Small_RNA
TC0400003355.mm.1	14.76	16.14	-2.61	0.383142	-1.38405	0.0363	1.44009	0.1898	Gm22092	predicted gene, 22092 [Source:MGI Symbol;Acc:MGI:5451869]	Small_RNA
TC0600000097.mm.1	14.76	16.14	-2.61	0.383142	-1.38405	0.0363	1.44009	0.1898	Gm25737	predicted gene, 25737 [Source:MGI Symbol;Acc:MGI:5455514]	Small_RNA
TC0600001859.mm.1	14.76	16.14	-2.61	0.383142	-1.38405	0.0363	1.44009	0.1898	Gm26058	predicted gene, 26058 [Source:MGI Symbol;Acc:MGI:5455835]	Small_RNA
TC0700001522.mm.1	14.76	16.14	-2.61	0.383142	-1.38405	0.0363	1.44009	0.1898	Gm25405	predicted gene, 25405 [Source:MGI Symbol;Acc:MGI:5455182]	Small_RNA
TC0700002332.mm.1	14.76	16.14	-2.61	0.383142	-1.38405	0.0363	1.44009	0.1898	Gm24414	predicted gene, 24414 [Source:MGI Symbol;Acc:MGI:5454191]	Small_RNA
TC0700003653.mm.1	14.76	16.14	-2.61	0.383142	-1.38405	0.0363	1.44009	0.1898	Gm25790	predicted gene, 25790 [Source:MGI Symbol;Acc:MGI:5455567]	Small_RNA
TC0700004082.mm.1	14.76	16.14	-2.61	0.383142	-1.38405	0.0363	1.44009	0.1898	Gm22822	predicted gene, 22822 [Source:MGI Symbol;Acc:MGI:5452599]	Small_RNA
TC0800001160.mm.1	14.76	16.14	-2.61	0.383142	-1.38405	0.0363	1.44009	0.1898	Gm24693	predicted gene, 24693 [Source:MGI Symbol;Acc:MGI:5454470]	Small_RNA
TC0800001649.mm.1	14.76	16.14	-2.61	0.383142	-1.38405	0.0363	1.44009	0.1898	Gm26427	predicted gene, 26427 [Source:MGI Symbol;Acc:MGI:5456204]	Small_RNA
TC0800002326.mm.1	14.76	16.14	-2.61	0.383142	-1.38405	0.0363	1.44009	0.1898	Gm24205	predicted gene, 24205 [Source:MGI Symbol;Acc:MGI:5453982]	Small_RNA
TC0900000797.mm.1	14.76	16.14	-2.61	0.383142	-1.38405	0.0363	1.44009	0.1898	Gm25064	predicted gene, 25064 [Source:MGI Symbol;Acc:MGI:5454841]	Small_RNA
TC0X00000451.mm.1	14.76	16.14	-2.61	0.383142	-1.38405	0.0363	1.44009	0.1898	Gm22288	predicted gene, 22288 [Source:MGI Symbol;Acc:MGI:5452065]	Small_RNA
TC0X00000814.mm.1	14.76	16.14	-2.61	0.383142	-1.38405	0.0363	1.44009	0.1898	Gm22580	predicted gene, 22580 [Source:MGI Symbol;Acc:MGI:5452357]	Small_RNA
TC0X00001641.mm.1	14.76	16.14	-2.61	0.383142	-1.38405	0.0363	1.44009	0.1898	Gm26317	predicted gene, 26317 [Source:MGI Symbol;Acc:MGI:5456094]	Small_RNA
TC1000000146.mm.1	14.76	16.14	-2.61	0.383142	-1.38405	0.0363	1.44009	0.1898	Gm25256	predicted gene, 25256 [Source:MGI Symbol;Acc:MGI:5455033]	Small_RNA
TC1000000683.mm.1	14.76	16.14	-2.61	0.383142	-1.38405	0.0363	1.44009	0.1898	Gm24486	predicted gene, 24486 [Source:MGI Symbol;Acc:MGI:5454263]	Small_RNA
TC1000000826.mm.1	14.76	16.14	-2.61	0.383142	-1.38405	0.0363	1.44009	0.1898	Gm24019	predicted gene, 24019 [Source:MGI Symbol;Acc:MGI:5453796]	Small_RNA
TC1000000832.mm.1	14.76	16.14	-2.61	0.383142	-1.38405	0.0363	1.44009	0.1898	Gm26243	predicted gene, 26243 [Source:MGI Symbol;Acc:MGI:5456020]	Small_RNA
TC1000002939.mm.1	14.76	16.14	-2.61	0.383142	-1.38405	0.0363	1.44009	0.1898	Gm25709	predicted gene, 25709 [Source:MGI Symbol;Acc:MGI:5455486]	Small_RNA
TC1100002111.mm.1	14.76	16.14	-2.61	0.383142	-1.38405	0.0363	1.44009	0.1898	Gm24803	predicted gene, 24803 [Source:MGI Symbol;Acc:MGI:5454580]	Small_RNA
TC1200000429.mm.1	14.76	16.14	-2.61	0.383142	-1.38405	0.0363	1.44009	0.1898	Gm24859	predicted gene, 24859 [Source:MGI Symbol;Acc:MGI:5454636]	Small_RNA
TC1200000950.mm.1	14.76	16.14	-2.61	0.383142	-1.38405	0.0363	1.44009	0.1898	Gm22246	predicted gene, 22246 [Source:MGI Symbol;Acc:MGI:5452023]	Small_RNA
TC1200001440.mm.1	14.76	16.14	-2.61	0.383142	-1.38405	0.0363	1.44009	0.1898	Gm22170	predicted gene, 22170 [Source:MGI Symbol;Acc:MGI:5451947]	Small_RNA
TC1200001734.mm.1	14.76	16.14	-2.61	0.383142	-1.38405	0.0363	1.44009	0.1898	Gm23296	predicted gene, 23296 [Source:MGI Symbol;Acc:MGI:5453073]	Small_RNA
TC1300000119.mm.1	14.76	16.14	-2.61	0.383142	-1.38405	0.0363	1.44009	0.1898	Gm24873	predicted gene, 24873 [Source:MGI Symbol;Acc:MGI:5454650]	Small_RNA
TC1400000414.mm.1	14.76	16.14	-2.61	0.383142	-1.38405	0.0363	1.44009	0.1898	Gm22823	predicted gene, 22823 [Source:MGI Symbol;Acc:MGI:5452600]	Small_RNA
TC1400002397.mm.1	14.76	16.14	-2.61	0.383142	-1.38405	0.0363	1.44009	0.1898	Gm24540	predicted gene, 24540 [Source:MGI Symbol;Acc:MGI:5454317]	Small_RNA
TC1500000618.mm.1	14.76	16.14	-2.61	0.383142	-1.38405	0.0363	1.44009	0.1898	Gm24753	predicted gene, 24753 [Source:MGI Symbol;Acc:MGI:5454530]	Small_RNA
TC1500001678.mm.1	14.76	16.14	-2.61	0.383142	-1.38405	0.0363	1.44009	0.1898	Gm23217	predicted gene, 23217 [Source:MGI Symbol;Acc:MGI:5452994]	Small_RNA
TC1600000399.mm.1	14.76	16.14	-2.61	0.383142	-1.38405	0.0363	1.44009	0.1898	Gm26295	predicted gene, 26295 [Source:MGI Symbol;Acc:MGI:5456072]	Small_RNA
TC1600001250.mm.1	14.76	16.14	-2.61	0.383142	-1.38405	0.0363	1.44009	0.1898	Gm25547	predicted gene, 25547 [Source:MGI Symbol;Acc:MGI:5455324]	Small_RNA
TC1700001261.mm.1	14.76	16.14	-2.61	0.383142	-1.38405	0.0363	1.44009	0.1898	Gm24722	predicted gene, 24722 [Source:MGI Symbol;Acc:MGI:5454499]	Small_RNA
TC1700001471.mm.1	14.76	16.14	-2.61	0.383142	-1.38405	0.0363	1.44009	0.1898	Rnu6	U6 small nuclear RNA	Small_RNA
TC1800001498.mm.1	14.76	16.14	-2.61	0.383142	-1.38405	0.0363	1.44009	0.1898	Gm23512	predicted gene, 23512 [Source:MGI Symbol;Acc:MGI:5453289]	Small_RNA
TC0100002912.mm.1	13.76	15.14	-2.61	0.383142	-1.38405	0.0229	1.64016	0.1465	Gm24267	predicted gene, 24267 [Source:MGI Symbol;Acc:MGI:5454044]	Small_RNA
TC1900000487.mm.1	12.91	14.29	-2.61	0.383142	-1.38405	0.0472	1.32606	0.2203	Gm23095	predicted gene, 23095 [Source:MGI Symbol;Acc:MGI:5452872]	Small_RNA
TC1800000977.mm.1	8.06	9.44	-2.6	0.384615	-1.37851	0.0112	1.95078	0.0972	Esco1	establishment of cohesion 1 homolog 1 (S. cerevisiae)	Multiple_Complex
TC0600002511.mm.1	14.67	16.05	-2.6	0.384615	-1.37851	0.027	1.56864	0.1617	Gm23924	predicted gene, 23924 [Source:MGI Symbol;Acc:MGI:5453701]	Small_RNA
TC0300001396.mm.1	13.23	14.61	-2.6	0.384615	-1.37851	0.0339	1.4698	0.1838	Gm25080	predicted gene, 25080 [Source:MGI Symbol;Acc:MGI:5454857]	Small_RNA
TC0300000903.mm.1	6.22	7.59	-2.59	0.3861	-1.37295	0.0068	2.16749	0.0724	Ctss	cathepsin S; cathepsin S (Ctss), transcript variant 1, mRNA.	Coding
TC0300002576.mm.1	14.6	15.97	-2.59	0.3861	-1.37295	0.029	1.5376	0.1681	Gm22505	predicted gene, 22505 [Source:MGI Symbol;Acc:MGI:5452282]	Small_RNA
TC0600002181.mm.1	14.6	15.97	-2.59	0.3861	-1.37295	0.029	1.5376	0.1681	Gm22363	predicted gene, 22363 [Source:MGI Symbol;Acc:MGI:5452140]	Small_RNA
TC0800002751.mm.1	7.53	8.9	-2.58	0.387597	-1.36737	0.007	2.1549	0.0744	Gm26493	predicted gene, 26493 [Source:MGI Symbol;Acc:MGI:5456270]	Small_RNA
TC1200000603.mm.1	12.08	13.44	-2.58	0.387597	-1.36737	0.0322	1.49214	0.1787	Psma3	proteasome (prosome, macropain) subunit, alpha type 3	Multiple_Complex
TC1400002197.mm.1	5.7	7.07	-2.57	0.389105	-1.36177	0.0425	1.37161	0.2076	Mir15a	microRNA 15a	Precursor_microRNA
TC0800000621.mm.1	8.17	9.53	-2.57	0.389105	-1.36177	0.0114	1.9431	0.0981	Hpgd	hydroxyprostaglandin dehydrogenase 15 (NAD)	Multiple_Complex
TC0300000150.mm.1	6.89	8.25	-2.56	0.390625	-1.35614	0.0302	1.51999	0.1721	Gm24704	predicted gene, 24704 [Source:MGI Symbol;Acc:MGI:5454481]	Small_RNA
TC1700000200.mm.1	9.15	10.51	-2.56	0.390625	-1.35614	0.0248	1.60555	0.1539	Gm6712	predicted gene 6712 [Source:MGI Symbol;Acc:MGI:3645888]	Multiple_Complex
TC1000002631.mm.1	12.07	13.43	-2.56	0.390625	-1.35614	0.0352	1.45346	0.1873	Gm23191	predicted gene, 23191 [Source:MGI Symbol;Acc:MGI:5452968]	Small_RNA
TC0600000639.mm.1	13.45	14.8	-2.56	0.390625	-1.35614	0.01	2	0.0905	Gm25818	predicted gene, 25818 [Source:MGI Symbol;Acc:MGI:5455595]	Small_RNA
TC1300002658.mm.1	6.05	7.4	-2.56	0.390625	-1.35614	0.0221	1.65561	0.1433	Gm15285	predicted gene 15285 [Source:MGI Symbol;Acc:MGI:3705624]	Pseudogene
TC1800001285.mm.1	12.12	13.47	-2.56	0.390625	-1.35614	0.0072	2.14267	0.0753	Gm10540	predicted gene 10540 [Source:MGI Symbol;Acc:MGI:3642696]	Pseudogene
TC0400001964.mm.1	13.86	15.21	-2.55	0.392157	-1.3505	0.0264	1.5784	0.16	n-R5s193	nuclear encoded rRNA 5S 193 [Source:MGI Symbol;Acc:MGI:4422058]	Ribosomal
TC0600000954.mm.1	9.95	11.31	-2.55	0.392157	-1.3505	0.0114	1.9431	0.0985	Npm3-ps1	nucleoplasmin 3, pseudogene 1	Multiple_Complex
TC0X00001797.mm.1	8.42	9.77	-2.55	0.392157	-1.3505	0.0035	2.45593	0.0485	Rbm3	RNA binding motif protein 3	Multiple_Complex
TC1600001284.mm.1	13.31	14.66	-2.55	0.392157	-1.3505	0.0419	1.37779	0.206	Gm22129	predicted gene, 22129 [Source:MGI Symbol;Acc:MGI:5451906]	Small_RNA
TC0100001693.mm.1	12.79	14.14	-2.55	0.392157	-1.3505	0.0248	1.60555	0.1537	Gm24405	predicted gene, 24405 [Source:MGI Symbol;Acc:MGI:5454182]	Small_RNA
TC0700000210.mm.1	10.1	11.45	-2.55	0.392157	-1.3505	0.045	1.34679	0.2142	Gm23714	predicted gene, 23714 [Source:MGI Symbol;Acc:MGI:5453491]	Small_RNA
TC1800001307.mm.1	7.48	8.83	-2.55	0.392157	-1.3505	0.0032	2.49485	0.0458	Cdo1	cysteine dioxygenase 1, cytosolic	Coding
TC1500000358.mm.1	6.45	7.8	-2.54	0.393701	-1.34483	0.0182	1.73993	0.1294	Gm23343	predicted gene, 23343 [Source:MGI Symbol;Acc:MGI:5453120]	Small_RNA
TC1000001779.mm.1	12.45	13.79	-2.54	0.393701	-1.34483	0.043	1.36653	0.2092	Gm22995	predicted gene, 22995 [Source:MGI Symbol;Acc:MGI:5452772]	Small_RNA
TC0X00000741.mm.1	6.15	7.5	-2.54	0.393701	-1.34483	0.0408	1.38934	0.2026	Fundc2	FUN14 domain containing 2	Multiple_Complex
TC1100001666.mm.1	7.35	8.7	-2.54	0.393701	-1.34483	0.024	1.61979	0.151	Gm24950	predicted gene, 24950 [Source:MGI Symbol;Acc:MGI:5454727]	Multiple_Complex
TC0200000551.mm.1	9.42	10.76	-2.54	0.393701	-1.34483	0.0028	2.55284	0.0424	Ass1; Gm5424	argininosuccinate synthetase 1; argininosuccinate synthase pseudogene	Multiple_Complex
TC0900001160.mm.1	14.96	16.31	-2.54	0.393701	-1.34483	0.0158	1.80134	0.1196	Gm22866	predicted gene, 22866 [Source:MGI Symbol;Acc:MGI:5452643]	Small_RNA
TC1300001170.mm.1	9.6	10.94	-2.52	0.396825	-1.33342	0.0002	3.69897	0.0075	Trim23	tripartite motif-containing 23	Multiple_Complex
TC0100000156.mm.1	6.83	8.16	-2.52	0.396825	-1.33342	0.018	1.74473	0.1286	Mir30c-2	microRNA 30c-2	Multiple_Complex
TC1300000101.mm.1	9.55	10.88	-2.52	0.396825	-1.33342	0.003	2.52288	0.0439	Psma2	proteasome (prosome, macropain) subunit, alpha type 2	Multiple_Complex
TC0300002265.mm.1	11.28	12.61	-2.52	0.396825	-1.33342	0.008	2.09691	0.0796	Rnu73b	U73B small nuclear RNA	Small_RNA
TC1300001507.mm.1	14.88	16.21	-2.52	0.396825	-1.33342	0.0246	1.60906	0.1531	Gm24018	predicted gene, 24018 [Source:MGI Symbol;Acc:MGI:5453795]	Small_RNA
TC1500001728.mm.1	6.59	7.92	-2.52	0.396825	-1.33342	0.0162	1.79048	0.1207	Ly6a	lymphocyte antigen 6 complex, locus A; lymphocyte antigen 6 complex, locus A (Ly6a), mRNA.	Multiple_Complex
TC0200003854.mm.1	6.83	8.16	-2.52	0.396825	-1.33342	0.0161	1.79317	0.1206	Gm13680	predicted gene 13680 [Source:MGI Symbol;Acc:MGI:3652285]	Pseudogene
TC0X00000745.mm.1	6.92	8.25	-2.52	0.396825	-1.33342	0.0289	1.5391	0.168	Vbp1	von Hippel-Lindau binding protein 1; Synthetic construct Mus musculus clone IMAGE:100015730, MGC:183413 von Hippel-Lindau binding protein 1 (Vbp1) mRNA, encodes complete protein.	Multiple_Complex
TC0200004448.mm.1	13.99	15.32	-2.51	0.398406	-1.32769	0.0323	1.4908	0.1791	Gm23814	predicted gene, 23814 [Source:MGI Symbol;Acc:MGI:5453591]	Small_RNA
TC0M00000011.mm.1	17.49	18.82	-2.51	0.398406	-1.32769	0.0022	2.65758	0.0363	ND3	NADH dehydrogenase subunit 3	Coding
TC1100002541.mm.1	12.9	14.23	-2.51	0.398406	-1.32769	0.0487	1.31247	0.224	Gm23520	predicted gene, 23520 [Source:MGI Symbol;Acc:MGI:5453297]	Small_RNA
TC0200004962.mm.1	7.08	8.41	-2.51	0.398406	-1.32769	0.0261	1.58336	0.1584	Gm14238	predicted gene 14238 [Source:MGI Symbol;Acc:MGI:3651676]	Multiple_Complex
TC0800000331.mm.1	9.96	11.28	-2.5	0.4	-1.32193	0.0354	1.451	0.188	Star	steroidogenic acute regulatory protein	Coding
TC1200001715.mm.1	10.13	11.45	-2.49	0.401606	-1.31615	0.0108	1.96658	0.0952	Strn3	striatin, calmodulin binding protein 3	Coding
TC0X00001216.mm.1	6.5	7.82	-2.49	0.401606	-1.31615	0.029	1.5376	0.1681	Gm5945	PREDICTED: predicted gene 5945 (Gm5945), mRNA.	Multiple_Complex
TC0500001127.mm.1	7.18	8.5	-2.49	0.401606	-1.31615	0.0287	1.54212	0.1674	Gm15446	predicted gene 15446	Multiple_Complex
TC0100000155.mm.1	8.14	9.45	-2.48	0.403226	-1.31034	4.04e-05	4.39362	0.0026			NonCoding
TC0300002128.mm.1	11.95	13.26	-2.48	0.403226	-1.31034	0.0334	1.47625	0.1821	Gm22009	predicted gene, 22009 [Source:MGI Symbol;Acc:MGI:5451786]	Small_RNA
TC0600001652.mm.1	8.95	10.26	-2.48	0.403226	-1.31034	0.0413	1.38405	0.2042	n-R5s168	nuclear encoded rRNA 5S 168 [Source:MGI Symbol;Acc:MGI:4422032]	Ribosomal
TC0X00000471.mm.1	8.07	9.38	-2.48	0.403226	-1.31034	0.0085	2.07058	0.0825	Hprt	hypoxanthine guanine phosphoribosyl transferase	Coding
TC0200005331.mm.1	10.38	11.69	-2.47	0.404858	-1.30451	0.0443	1.3536	0.2125	Gm14399	predicted gene 14399	Multiple_Complex
TC0800001205.mm.1	14.86	16.16	-2.47	0.404858	-1.30451	0.0338	1.47108	0.1835	Gm22063	predicted gene, 22063 [Source:MGI Symbol;Acc:MGI:5451840]	Small_RNA
TC0600000091.mm.1	8.37	9.67	-2.47	0.404858	-1.30451	0.0197	1.70553	0.1349	Tmem106b	transmembrane protein 106B	Multiple_Complex
TC0300002263.mm.1	11.88	13.18	-2.47	0.404858	-1.30451	0.0483	1.31605	0.2232	Rps3a1	ribosomal protein S3A1	Coding
TC0500002735.mm.1	14.74	16.05	-2.47	0.404858	-1.30451	0.0407	1.39041	0.2022	Gm23092	predicted gene, 23092 [Source:MGI Symbol;Acc:MGI:5452869]	Small_RNA
TC0500003706.mm.1	14.74	16.05	-2.47	0.404858	-1.30451	0.0407	1.39041	0.2022	Gm24242	predicted gene, 24242 [Source:MGI Symbol;Acc:MGI:5454019]	Small_RNA
TC0X00002345.mm.1	5.84	7.14	-2.47	0.404858	-1.30451	0.0001	4	0.0057	Mir883b	microRNA 883b	Precursor_microRNA
TC0600001639.mm.1	7.71	9.01	-2.47	0.404858	-1.30451	0.0165	1.78252	0.1222	Mgst1	microsomal glutathione S-transferase 1	Multiple_Complex
TC0500000339.mm.1	10.48	11.78	-2.46	0.406504	-1.29866	0.0061	2.21467	0.0683	Ppp1cb	protein phosphatase 1, catalytic subunit, beta isoform; protein phosphatase 1, catalytic subunit, beta isoform (Ppp1cb), mRNA.	Multiple_Complex
TC0500002915.mm.1	10.17	11.47	-2.46	0.406504	-1.29866	0.0032	2.49485	0.0461	Hfm1	HFM1, ATP-dependent DNA helicase homolog (S. cerevisiae)	Multiple_Complex
TC0400000223.mm.1	14.76	16.05	-2.46	0.406504	-1.29866	0.0273	1.56384	0.1628	Gm25173	predicted gene, 25173 [Source:MGI Symbol;Acc:MGI:5454950]	Small_RNA
TC0500002689.mm.1	14.76	16.05	-2.46	0.406504	-1.29866	0.0273	1.56384	0.1628	Gm25211	predicted gene, 25211 [Source:MGI Symbol;Acc:MGI:5454988]	Small_RNA
TC1100001603.mm.1	14.76	16.05	-2.46	0.406504	-1.29866	0.0273	1.56384	0.1628	Gm26324	predicted gene, 26324 [Source:MGI Symbol;Acc:MGI:5456101]	Small_RNA
TC1200001300.mm.1	14.76	16.05	-2.46	0.406504	-1.29866	0.0273	1.56384	0.1628	Gm23732	predicted gene, 23732 [Source:MGI Symbol;Acc:MGI:5453509]	Small_RNA
TC0700000876.mm.1	14.81	16.11	-2.45	0.408163	-1.29278	0.0301	1.52143	0.1718	Gm22969	predicted gene, 22969 [Source:MGI Symbol;Acc:MGI:5452746]	Small_RNA
TC1700000277.mm.1	6.97	8.26	-2.45	0.408163	-1.29278	0.027	1.56864	0.1616	Gm10509	zinc finger protein 51 pseudogene	Multiple_Complex
TC1200001785.mm.1	8.54	9.83	-2.45	0.408163	-1.29278	0.0131	1.88273	0.1072	Mbip	MAP3K12 binding inhibitory protein 1	Coding
TC0X00000109.mm.1	5.15	6.44	-2.45	0.408163	-1.29278	0.0012	2.92082	0.024			NonCoding
TC0X00001825.mm.1	10.71	12.01	-2.45	0.408163	-1.29278	0.029	1.5376	0.1681			NonCoding
TC0600001875.mm.1	7.07	8.36	-2.45	0.408163	-1.29278	0.0006	3.22185	0.0149	B630005N14Rik	RIKEN cDNA B630005N14 gene	Multiple_Complex
TC0100000707.mm.1	8.59	9.88	-2.44	0.409836	-1.28688	0.0342	1.46597	0.1845	n-R5s213	nuclear encoded rRNA 5S 213 [Source:MGI Symbol;Acc:MGI:4422078]	Ribosomal
TC0700000920.mm.1	8.58	9.86	-2.44	0.409836	-1.28688	0.0394	1.4045	0.1987	Gm22444	predicted gene, 22444 [Source:MGI Symbol;Acc:MGI:5452221]	Small_RNA
TC0200001238.mm.1	8.48	9.77	-2.44	0.409836	-1.28688	0.0188	1.72584	0.1317	Gm23716	predicted gene, 23716 [Source:MGI Symbol;Acc:MGI:5453493]	Small_RNA
TC0800002414.mm.1	6.59	7.87	-2.44	0.409836	-1.28688	0.0278	1.55596	0.1646	Snora68	small nucleolar RNA, H/ACA box 68	Small_RNA
TC1500000658.mm.1	9.66	10.95	-2.43	0.411523	-1.28096	0.023	1.63827	0.1468	Lgals1	lectin, galactose binding, soluble 1	Coding
TC0600003465.mm.1	6.81	8.1	-2.43	0.411523	-1.28096	0.0294	1.53165	0.1694	Gm23456	predicted gene, 23456 [Source:MGI Symbol;Acc:MGI:5453233]	Small_RNA
TC1100004295.mm.1	8.37	9.65	-2.43	0.411523	-1.28096	0.0271	1.56703	0.1623	Nme2	NME/NM23 nucleoside diphosphate kinase 2	Coding
TC1300001627.mm.1	10.16	11.44	-2.42	0.413223	-1.27501	0.0377	1.42366	0.1938	Gm19658	PREDICTED: predicted gene, 19658 (Gm19658), miscRNA.	NonCoding
TC0400001702.mm.1	14.27	15.54	-2.42	0.413223	-1.27501	0.0448	1.34872	0.2137	Gm25772	predicted gene, 25772 [Source:MGI Symbol;Acc:MGI:5455549]	Small_RNA
TC0800000910.mm.1	7.26	8.54	-2.42	0.413223	-1.27501	0.009	2.04576	0.0851	Gm25138	predicted gene, 25138 [Source:MGI Symbol;Acc:MGI:5454915]	Small_RNA
TC1000000484.mm.1	9.25	10.52	-2.41	0.414938	-1.26903	0.036	1.4437	0.1898	Asf1a	anti-silencing function 1A histone chaperone; ASF1 anti-silencing function 1 homolog A (S. cerevisiae)	Coding
TC0600001765.mm.1	4.9	6.17	-2.41	0.414938	-1.26903	0.0223	1.6517	0.1444	Gm15781	predicted gene 15781 [Source:MGI Symbol;Acc:MGI:3783223]	Multiple_Complex
TC1100000238.mm.1	10.22	11.49	-2.41	0.414938	-1.26903	0.0061	2.21467	0.0682	Xpo1	exportin 1, CRM1 homolog (yeast)	Multiple_Complex
TC1700000986.mm.1	6.81	8.07	-2.4	0.416667	-1.26303	0.0166	1.77989	0.1226	Gm17377	predicted gene, 17377 [Source:MGI Symbol;Acc:MGI:4937011]	Multiple_Complex
TC0700004141.mm.1	7.81	9.08	-2.4	0.416667	-1.26303	0.0183	1.73755	0.1298	Cyp2r1	cytochrome P450, family 2, subfamily r, polypeptide 1; cytochrome P450, family 2, subfamily r, polypeptide 1 (Cyp2r1), mRNA.	Multiple_Complex
TC1100000098.mm.1	12.26	13.52	-2.4	0.416667	-1.26303	0.0402	1.39577	0.2011	Gm11971	predicted gene 11971 [Source:MGI Symbol;Acc:MGI:3650054]	Pseudogene
TC0700001844.mm.1	12.78	14.05	-2.4	0.416667	-1.26303	0.0203	1.6925	0.137	Smt3h2-ps2	SMT3 suppressor of mif two 3 homolog 2, pseudogene 2 (S. cerevisiae)	Pseudogene
TC1500000352.mm.1	11.93	13.19	-2.4	0.416667	-1.26303	0.0477	1.32148	0.2217	Gm22392	predicted gene, 22392 [Source:MGI Symbol;Acc:MGI:5452169]	Small_RNA
TC0300001587.mm.1	4.69	5.96	-2.4	0.416667	-1.26303	0.0058	2.23657	0.0663	Depdc1a	DEP domain containing 1a	Coding
TC0M00000003.mm.1	14.7	15.96	-2.4	0.416667	-1.26303	0.0165	1.78252	0.1221	mt-Tv	mitochondrially encoded tRNA valine [Source:MGI Symbol;Acc:MGI:102472]	tRNA
TC0X00000605.mm.1	6.17	7.43	-2.4	0.416667	-1.26303	0.0013	2.88606	0.0254	Gm1140; Gm14692	predicted gene 1140; predicted gene 14692	Coding
TC0X00002365.mm.1	6.17	7.43	-2.4	0.416667	-1.26303	0.0013	2.88606	0.0254	Gm1140; Gm14692	predicted gene 1140 (Gm1140), mRNA.; predicted gene 14692 (Gm14692), mRNA.; predicted gene 1140	Coding
TC1400001124.mm.1	7.73	8.99	-2.4	0.416667	-1.26303	0.0217	1.66354	0.1422	Gm23278	predicted gene, 23278 [Source:MGI Symbol;Acc:MGI:5453055]	Small_RNA
TC1400002598.mm.1	9.47	10.73	-2.39	0.41841	-1.25701	0.0102	1.9914	0.0919	Mzt1	mitotic spindle organizing protein 1	Coding
TC0100000152.mm.1	7.1	8.36	-2.39	0.41841	-1.25701	0.0061	2.21467	0.0681			NonCoding
TC1300000956.mm.1	14.79	16.04	-2.39	0.41841	-1.25701	0.0286	1.54363	0.1669	Gm24863	predicted gene, 24863 [Source:MGI Symbol;Acc:MGI:5454640]	Small_RNA
TC1900001587.mm.1	11.11	12.37	-2.39	0.41841	-1.25701	0.0281	1.55129	0.1654	Npm3	nucleoplasmin 3	Multiple_Complex
TC1000000275.mm.1	14.84	16.1	-2.39	0.41841	-1.25701	0.0374	1.42713	0.1929	Gm22623	predicted gene, 22623 [Source:MGI Symbol;Acc:MGI:5452400]	Small_RNA
TC1300001669.mm.1	7.81	9.06	-2.39	0.41841	-1.25701	0.0169	1.77211	0.1237	Acot13	acyl-CoA thioesterase 13	Coding
TC0700002788.mm.1	10.86	12.12	-2.39	0.41841	-1.25701	0.0058	2.23657	0.0658	Fxyd1	FXYD domain-containing ion transport regulator 1	Multiple_Complex
TC0700000791.mm.1	6.66	7.91	-2.39	0.41841	-1.25701	0.0429	1.36754	0.209	Klk1b16	kallikrein 1-related peptidase b16	Coding
TC0500001365.mm.1	5.51	6.76	-2.39	0.41841	-1.25701	0.0096	2.01773	0.0882	Gm19731	PREDICTED: predicted gene, 19731 (Gm19731), miscRNA.	NonCoding
TC0Y00000227.mm.1	7.59	8.84	-2.38	0.420168	-1.25096	0.0349	1.45717	0.1863	Zfy1	zinc finger protein 1, Y-linked; zinc finger protein 1, Y linked	Coding
TC1700000198.mm.1	9.63	10.88	-2.38	0.420168	-1.25096	0.0077	2.11351	0.0783	Zfp97	zinc finger protein 97; Synthetic construct Mus musculus clone IMAGE:100014870, MGC:180296 zinc finger protein 97 (Zfp97) mRNA, encodes complete protein.	Coding
TC0900000082.mm.1	12.25	13.49	-2.38	0.420168	-1.25096	0.045	1.34679	0.2143	Gm26189	predicted gene, 26189 [Source:MGI Symbol;Acc:MGI:5455966]	Small_RNA
TC1000003056.mm.1	7.03	8.27	-2.37	0.421941	-1.24489	0.0024	2.61979	0.0383	Tmem5; Gm9079	transmembrane protein 5; transmembrane emp24 domain trafficking protein 2 pseudogene	Multiple_Complex
TC0200004677.mm.1	7.76	9.01	-2.37	0.421941	-1.24489	0.0459	1.33819	0.2167			NonCoding
TC1000000312.mm.1	10.41	11.65	-2.37	0.421941	-1.24489	0.0298	1.52578	0.171	Hdac2	histone deacetylase 2	Multiple_Complex
TC0100003351.mm.1	10.83	12.08	-2.37	0.421941	-1.24489	0.0157	1.8041	0.1193	Cacybp	calcyclin binding protein	Coding
TC0900001596.mm.1	5.49	6.73	-2.37	0.421941	-1.24489	0.0197	1.70553	0.1347	Gm24044	predicted gene, 24044 [Source:MGI Symbol;Acc:MGI:5453821]	Small_RNA
TC0400002731.mm.1	8.59	9.83	-2.37	0.421941	-1.24489	0.0132	1.87943	0.1077	Txn1	thioredoxin 1	Coding
TC0500002908.mm.1	10.97	12.22	-2.37	0.421941	-1.24489	0.0402	1.39577	0.201	Gm25672	predicted gene, 25672 [Source:MGI Symbol;Acc:MGI:5455449]	Small_RNA
TC1100002775.mm.1	12.26	13.5	-2.37	0.421941	-1.24489	0.0171	1.767	0.125	Gm12231	predicted gene 12231	Pseudogene
TC0X00001651.mm.1	11.45	12.69	-2.36	0.423729	-1.23879	0.0007	3.1549	0.0166	Rbbp7	retinoblastoma binding protein 7	Coding
TC1800000653.mm.1	7.14	8.38	-2.36	0.423729	-1.23879	0.0143	1.84466	0.1127	Gm22210	predicted gene, 22210 [Source:MGI Symbol;Acc:MGI:5451987]	Small_RNA
TC1200001834.mm.1	8.78	10.01	-2.36	0.423729	-1.23879	0.0045	2.34679	0.0571	Mis18bp1	MIS18 binding protein 1	Multiple_Complex
TC0900000244.mm.1	10.41	11.64	-2.36	0.423729	-1.23879	0.0061	2.21467	0.0683	2018-09-07	septin 7	Coding
TC0700004283.mm.1	14.95	16.18	-2.36	0.423729	-1.23879	0.0122	1.91364	0.1025	Gm24596	predicted gene, 24596 [Source:MGI Symbol;Acc:MGI:5454373]	Small_RNA
TC1600002086.mm.1	14.7	15.94	-2.35	0.425532	-1.23266	0.0332	1.47886	0.1815	Gm25245	predicted gene, 25245 [Source:MGI Symbol;Acc:MGI:5455022]	Small_RNA
TC1900001754.mm.1	9.03	10.27	-2.35	0.425532	-1.23266	0.0003	3.52288	0.0089	Prdx3	peroxiredoxin 3	Coding
TC1300002689.mm.1	5.78	7.01	-2.35	0.425532	-1.23266	0.0258	1.58838	0.1574	Gpx8	glutathione peroxidase 8 (putative)	Coding
TC0700004513.mm.1	6.17	7.41	-2.35	0.425532	-1.23266	3.64e-06	5.4389	0.0005	Ifitm2	interferon induced transmembrane protein 2	Coding
TC1200001736.mm.1	5.66	6.89	-2.35	0.425532	-1.23266	0.0238	1.62342	0.1502	n-R5s58	nuclear encoded rRNA 5S 58 [Source:MGI Symbol;Acc:MGI:4421903]	Ribosomal
TC0X00000066.mm.1	12.43	13.65	-2.34	0.42735	-1.22651	0.029	1.5376	0.1682	Smt3h2-ps	SMT3 suppressor of mif two 3 homolog 2, pseudogene (S. cerevisiae)	Pseudogene
TC0900001906.mm.1	9.9	11.13	-2.34	0.42735	-1.22651	0.0042	2.37675	0.0543	Gm10182	predicted pseudogene 10182 [Source:MGI Symbol;Acc:MGI:3704327]	Multiple_Complex
TC0200000590.mm.1	9.17	10.4	-2.34	0.42735	-1.22651	0.0026	2.58503	0.0402	Gm26236	predicted gene, 26236 [Source:MGI Symbol;Acc:MGI:5456013]	Small_RNA
TC1700000867.mm.1	12.77	14	-2.34	0.42735	-1.22651	0.046	1.33724	0.2169	Gm25008	predicted gene, 25008 [Source:MGI Symbol;Acc:MGI:5454785]	Small_RNA
TC0800000987.mm.1	7.81	9.04	-2.34	0.42735	-1.22651	0.0021	2.67778	0.0355	Orc6	origin recognition complex, subunit 6	Multiple_Complex
TC1600001411.mm.1	11.1	12.32	-2.34	0.42735	-1.22651	0.0311	1.50724	0.175	Gm24928	predicted gene, 24928 [Source:MGI Symbol;Acc:MGI:5454705]	Small_RNA
TC0600003335.mm.1	7.35	8.57	-2.34	0.42735	-1.22651	0.0044	2.35655	0.0558	Mgp	matrix Gla protein	Coding
TC0100003106.mm.1	6.35	7.58	-2.34	0.42735	-1.22651	0.0466	1.33161	0.2184	Gm24517	predicted gene, 24517 [Source:MGI Symbol;Acc:MGI:5454294]	Small_RNA
TC1100001588.mm.1	10.59	11.81	-2.33	0.429185	-1.22033	0.0291	1.53611	0.1686	Gm22061	predicted gene, 22061 [Source:MGI Symbol;Acc:MGI:5451838]	Small_RNA
TC0700000951.mm.1	9.31	10.53	-2.33	0.429185	-1.22033	0.0488	1.31158	0.2242			NonCoding
TC1600000306.mm.1	8.91	10.13	-2.33	0.429185	-1.22033	0.0287	1.54212	0.1673	Gm6467	predicted gene 6467 [Source:MGI Symbol;Acc:MGI:3645284]	Pseudogene
TC0600001188.mm.1	10.95	12.17	-2.33	0.429185	-1.22033	0.0395	1.4034	0.199	Gm22418	predicted gene, 22418 [Source:MGI Symbol;Acc:MGI:5452195]	Small_RNA
TC0X00000718.mm.1	12.49	13.71	-2.33	0.429185	-1.22033	0.0496	1.30452	0.2261	Gm26125	predicted gene, 26125 [Source:MGI Symbol;Acc:MGI:5455902]	Small_RNA
TC1000001055.mm.1	8.33	9.55	-2.33	0.429185	-1.22033	0.0018	2.74473	0.0318	Tex18	PREDICTED: testis expressed gene 18 (Tex18), miscRNA.	NonCoding
TC0X00001128.mm.1	9.1	10.31	-2.32	0.431034	-1.21412	0.0043	2.36653	0.0554	Zfp711	zinc finger protein 711	Multiple_Complex
TC0500001188.mm.1	11.2	12.42	-2.32	0.431034	-1.21412	0.0398	1.40012	0.2	Gm22740	predicted gene, 22740 [Source:MGI Symbol;Acc:MGI:5452517]	Small_RNA
TC0100000153.mm.1	7.06	8.27	-2.32	0.431034	-1.21412	0.0149	1.82681	0.1158			NonCoding
TC1100002240.mm.1	6.36	7.58	-2.32	0.431034	-1.21412	0.0393	1.40561	0.1985	Sec61g	SEC61, gamma subunit	Multiple_Complex
TC0200003399.mm.1	6.01	7.21	-2.31	0.4329	-1.20789	0.0299	1.52433	0.171	Snord90	small nucleolar RNA, C/D box 90	Small_RNA
TC0400003363.mm.1	9.25	10.46	-2.31	0.4329	-1.20789	0.0082	2.08619	0.0807	Gm22980	predicted gene, 22980 [Source:MGI Symbol;Acc:MGI:5452757]	Small_RNA
TC0X00001400.mm.1	10.45	11.65	-2.3	0.434783	-1.20163	0.0015	2.82391	0.0285	Gm6382	predicted gene 6382 [Source:MGI Symbol;Acc:MGI:3646438]	Pseudogene
TC0700004163.mm.1	12.12	13.33	-2.3	0.434783	-1.20163	0.044	1.35655	0.2116	Gm26054	predicted gene, 26054 [Source:MGI Symbol;Acc:MGI:5455831]	Small_RNA
TC0X00002417.mm.1	6.21	7.41	-2.3	0.434783	-1.20163	0.0106	1.97469	0.0943	Xlr4a	X-linked lymphocyte-regulated 4A	Multiple_Complex
TC1600000986.mm.1	6.69	7.89	-2.3	0.434783	-1.20163	0.0308	1.51145	0.174	Gm23406	predicted gene, 23406 [Source:MGI Symbol;Acc:MGI:5453183]	Small_RNA
TC1500001721.mm.1	9.88	11.09	-2.3	0.434783	-1.20163	0.0484	1.31515	0.2234	Gml	glycosylphosphatidylinositol anchored molecule like; GPI anchored molecule like protein	Coding
TC0200001102.mm.1	10.73	11.93	-2.3	0.434783	-1.20163	0.0418	1.37882	0.2059	Mtx2	metaxin 2	Multiple_Complex
TC0Y00000233.mm.1	7.02	8.22	-2.3	0.434783	-1.20163	0.0049	2.3098	0.0601	Uty	ubiquitously transcribed tetratricopeptide repeat gene, Y chromosome	Multiple_Complex
TC1300002491.mm.1	14.09	15.29	-2.29	0.436681	-1.19535	0.0421	1.37572	0.2062	Gm10260	predicted gene 10260 [Source:MGI Symbol;Acc:MGI:3642298]	Coding
TC0200004393.mm.1	16.18	17.38	-2.29	0.436681	-1.19535	0.019	1.72125	0.1324	Gm25514	predicted gene, 25514 [Source:MGI Symbol;Acc:MGI:5455291]	Small_RNA
TC1900000293.mm.1	11.01	12.21	-2.29	0.436681	-1.19535	0.0265	1.57675	0.1601	Gm24319	predicted gene, 24319 [Source:MGI Symbol;Acc:MGI:5454096]	Small_RNA
TC0400000081.mm.1	9.25	10.45	-2.29	0.436681	-1.19535	0.0184	1.73518	0.1301	Gm11829	predicted gene 11829 [Source:MGI Symbol;Acc:MGI:3649804]	Pseudogene
TC1300000965.mm.1	7.4	8.6	-2.29	0.436681	-1.19535	0.0049	2.3098	0.0596	Lysmd3	LysM, putative peptidoglycan-binding, domain containing 3	Coding
TC0100000984.mm.1	8.82	10.01	-2.29	0.436681	-1.19535	0.0093	2.03152	0.087	Gm20253	PREDICTED: predicted gene, 20253 (Gm20253), miscRNA.	NonCoding
TC0300002264.mm.1	6.97	8.16	-2.28	0.438596	-1.18903	0.0104	1.98297	0.0927	Snord73a	small nucleolar RNA, C/D box U73A	Small_RNA
TC0X00001947.mm.1	13.86	15.05	-2.28	0.438596	-1.18903	0.0408	1.38934	0.2026	Gm24535	predicted gene, 24535 [Source:MGI Symbol;Acc:MGI:5454312]	Small_RNA
TC0200002748.mm.1	8.69	9.88	-2.28	0.438596	-1.18903	0.0297	1.52724	0.1705	Gm14420	predicted gene 14420	Coding
TC0X00002154.mm.1	7.31	8.5	-2.27	0.440529	-1.18269	0.0054	2.26761	0.0637	Smarca1	SWI/SNF related, matrix associated, actin dependent regulator of chromatin, subfamily a, member 1	Multiple_Complex
TC1800000051.mm.1	10.92	12.11	-2.27	0.440529	-1.18269	0.0211	1.67572	0.1396	Gm24292	predicted gene, 24292 [Source:MGI Symbol;Acc:MGI:5454069]	Small_RNA
TC0700001313.mm.1	8.32	9.51	-2.27	0.440529	-1.18269	0.0004	3.39794	0.012	Gm26944; RP23-474B13.3	predicted gene, 26944 [Source:MGI Symbol;Acc:MGI:5504059]; novel transcript	NonCoding
TC0200004758.mm.1	6.54	7.73	-2.27	0.440529	-1.18269	0.0261	1.58336	0.1584	Gm26165	predicted gene, 26165 [Source:MGI Symbol;Acc:MGI:5455942]	Small_RNA
TC1800001327.mm.1	6.6	7.78	-2.27	0.440529	-1.18269	0.0332	1.47886	0.1816	Gm25785	predicted gene, 25785 [Source:MGI Symbol;Acc:MGI:5455562]	Small_RNA
TC0200004729.mm.1	7.66	8.83	-2.26	0.442478	-1.17632	0.0005	3.30103	0.0138	Esf1	ESF1, nucleolar pre-rRNA processing protein, homolog (S. cerevisiae)	Multiple_Complex
TC1300001631.mm.1	4.76	5.94	-2.25	0.444444	-1.16993	0.0041	2.38722	0.054	Hist1h4f	histone cluster 1, H4f; Synthetic construct Mus musculus clone IMAGE:100062238, MGC:190425 histone cluster 1, H4f (Hist1h4f) mRNA, encodes complete protein.	Coding
TC0500002790.mm.1	8.28	9.44	-2.24	0.446429	-1.1635	0.0324	1.48945	0.1793	Cnot6l	CCR4-NOT transcription complex, subunit 6-like; CCR4-NOT transcription complex, subunit 6-like (Cnot6l), transcript variant 2, mRNA.	Multiple_Complex
TC0200005385.mm.1	14.74	15.9	-2.24	0.446429	-1.1635	0.0129	1.88941	0.106	Sycp2	synaptonemal complex protein 2; Synthetic construct Mus musculus clone IMAGE:100069462, MGC:199364 synaptonemal complex protein 2 (Sycp2) mRNA, encodes complete protein.	Multiple_Complex
TC1500000857.mm.1	9.17	10.33	-2.24	0.446429	-1.1635	0.0218	1.66154	0.1425	Gm23737	predicted gene, 23737 [Source:MGI Symbol;Acc:MGI:5453514]	Small_RNA
TC0900001175.mm.1	6.76	7.93	-2.24	0.446429	-1.1635	0.0032	2.49485	0.0457	Plod2	procollagen lysine, 2-oxoglutarate 5-dioxygenase 2	Multiple_Complex
TC0400000269.mm.1	7.41	8.57	-2.24	0.446429	-1.1635	0.0073	2.13668	0.076	Casp8ap2	caspase 8 associated protein 2	Multiple_Complex
TC1100001383.mm.1	12.24	13.41	-2.24	0.446429	-1.1635	0.0272	1.56543	0.1627	Gm23507	predicted gene, 23507 [Source:MGI Symbol;Acc:MGI:5453284]	Small_RNA
TC1200001511.mm.1	9.58	10.74	-2.24	0.446429	-1.1635	0.0348	1.45842	0.1862	LOC100862386	PREDICTED: zinc finger protein 700-like (LOC100862386), partial mRNA.	Coding
TC0500000576.mm.1	6.53	7.69	-2.23	0.44843	-1.15704	0.0342	1.46597	0.1845	Gm6632	predicted pseudogene 6632 [Source:MGI Symbol;Acc:MGI:3644251]	Pseudogene
TC0100000014.mm.1	10.14	11.3	-2.23	0.44843	-1.15704	0.0181	1.74232	0.1288	Atp6v1h	ATPase, H+ transporting, lysosomal V1 subunit H	Coding
TC0900003133.mm.1	4.8	5.96	-2.23	0.44843	-1.15704	0.0317	1.49894	0.177	n-R5s90	nuclear encoded rRNA 5S 90 [Source:MGI Symbol;Acc:MGI:4421938]	Ribosomal
TC1700001155.mm.1	7.85	9.01	-2.23	0.44843	-1.15704	0.0157	1.8041	0.1194	Gm24475	predicted gene, 24475 [Source:MGI Symbol;Acc:MGI:5454252]	Small_RNA
TC0200004983.mm.1	10.26	11.42	-2.23	0.44843	-1.15704	0.0004	3.39794	0.0115	Rbm39	RNA binding motif protein 39	Multiple_Complex
TC0900000975.mm.1	14.43	15.59	-2.23	0.44843	-1.15704	0.0455	1.34199	0.2156	Gm23057	predicted gene, 23057 [Source:MGI Symbol;Acc:MGI:5452834]	Small_RNA
TC1700000955.mm.1	9.71	10.87	-2.23	0.44843	-1.15704	0.0003	3.52288	0.0101	Gm7334	predicted gene 7334 [Source:MGI Symbol;Acc:MGI:3647393]	Coding
TC1100000414.mm.1	7.62	8.77	-2.23	0.44843	-1.15704	0.01	2	0.0909	Gm12141; Hspd1-ps3	predicted gene 12141; heat shock protein 1 (chaperonin), pseudogene 3 [Source:MGI Symbol;Acc:MGI:3651246]	Pseudogene
TC0300000343.mm.1	15.79	16.95	-2.23	0.44843	-1.15704	0.0128	1.89279	0.1054	Gm23511	predicted gene, 23511 [Source:MGI Symbol;Acc:MGI:5453288]	Small_RNA
TC0400001008.mm.1	9.16	10.32	-2.22	0.45045	-1.15056	0.0165	1.78252	0.1221	Efcab7	EF-hand calcium binding domain 7	Multiple_Complex
TC1300000898.mm.1	10.34	11.49	-2.22	0.45045	-1.15056	4.27e-05	4.36957	0.0027	Mir692-2	microRNA 692-2	Multiple_Complex
TC1700001625.mm.1	11	12.15	-2.22	0.45045	-1.15056	0.0334	1.47625	0.1824	Gm25618	predicted gene, 25618 [Source:MGI Symbol;Acc:MGI:5455395]	Small_RNA
TC0X00000677.mm.1	6.23	7.38	-2.22	0.45045	-1.15056	0.0141	1.85078	0.1122	Xlr4b	X-linked lymphocyte-regulated 4B	Multiple_Complex
TC0X00002540.mm.1	9.74	10.89	-2.22	0.45045	-1.15056	0.0074	2.13077	0.0764	Gm8822	predicted gene 8822	Multiple_Complex
TC1600000526.mm.1	8.92	10.07	-2.22	0.45045	-1.15056	0.0013	2.88606	0.0263	Iqcb1	IQ calmodulin-binding motif containing 1	Multiple_Complex
TC0X00000902.mm.1	6.09	7.23	-2.21	0.452489	-1.14405	0.0242	1.61618	0.1517	Zxdb	zinc finger, X-linked, duplicated B	Coding
TC1500000486.mm.1	5.89	7.04	-2.21	0.452489	-1.14405	0.0101	1.99568	0.0917			NonCoding
TC0900001666.mm.1	8.54	9.69	-2.21	0.452489	-1.14405	0.0238	1.62342	0.1501	Sacm1l	SAC1 (suppressor of actin mutations 1, homolog)-like (S. cerevisiae)	Coding
TC0800002672.mm.1	14.71	15.85	-2.21	0.452489	-1.14405	0.0453	1.3439	0.2151	Gm26331	predicted gene, 26331 [Source:MGI Symbol;Acc:MGI:5456108]	Small_RNA
TC0100002938.mm.1	5.99	7.13	-2.2	0.454545	-1.1375	0.0334	1.47625	0.1824	2900060B14Rik	RIKEN cDNA 2900060B14 gene	Multiple_Complex
TC0200005399.mm.1	7.56	8.7	-2.2	0.454545	-1.1375	0.0282	1.54975	0.1658	Psma7	proteasome (prosome, macropain) subunit, alpha type 7	Multiple_Complex
TC0X00001524.mm.1	5.63	6.76	-2.19	0.456621	-1.13093	0.0195	1.70997	0.1341	n-R5s13	nuclear encoded rRNA 5S 13 [Source:MGI Symbol;Acc:MGI:4421747]	Ribosomal
TC1300002347.mm.1	8.18	9.31	-2.19	0.456621	-1.13093	0.006	2.22185	0.0674	Slf1	SMC5-SMC6 complex localization factor 1	Multiple_Complex
TC0200003098.mm.1	8.06	9.19	-2.19	0.456621	-1.13093	0.0043	2.36653	0.0549	Abi1	abl-interactor 1	Multiple_Complex
TC0X00002307.mm.1	8.44	9.56	-2.18	0.458716	-1.12433	0.0008	3.09691	0.0182	Atp11c	ATPase, class VI, type 11C	Multiple_Complex
TC1000001074.mm.1	9.22	10.34	-2.18	0.458716	-1.12433	0.0045	2.34679	0.057	Nup37	nucleoporin 37	Multiple_Complex
TC1800000799.mm.1	16.26	17.38	-2.18	0.458716	-1.12433	0.0148	1.82974	0.1151	Gm23301	predicted gene, 23301 [Source:MGI Symbol;Acc:MGI:5453078]	Small_RNA
TC0100003514.mm.1	10.38	11.5	-2.17	0.460829	-1.1177	0.0141	1.85078	0.1122	Gm23523	predicted gene, 23523 [Source:MGI Symbol;Acc:MGI:5453300]	Small_RNA
TC0900002810.mm.1	11.96	13.08	-2.17	0.460829	-1.1177	0.0474	1.32422	0.2207	Gm26135	predicted gene, 26135 [Source:MGI Symbol;Acc:MGI:5455912]	Small_RNA
TC1400000277.mm.1	10.57	11.69	-2.17	0.460829	-1.1177	0.0051	2.29243	0.0613	Fam208a	family with sequence similarity 208, member A	Multiple_Complex
TC1400002671.mm.1	4.68	5.79	-2.17	0.460829	-1.1177	0.036	1.4437	0.1897	Gm23459	predicted gene, 23459 [Source:MGI Symbol;Acc:MGI:5453236]	Small_RNA
TC0700001562.mm.1	9.4	10.52	-2.17	0.460829	-1.1177	0.0355	1.44977	0.1884			NonCoding
TC0200005370.mm.1	7.61	8.72	-2.17	0.460829	-1.1177	0.0315	1.50169	0.1765	Gm16363	predicted gene 16363 [Source:MGI Symbol;Acc:MGI:3840139]	Multiple_Complex
TC0800002313.mm.1	6.77	7.88	-2.17	0.460829	-1.1177	0.001	3	0.0217	Msmo1	methylsterol monoxygenase 1	Multiple_Complex
TC0200004879.mm.1	6.25	7.36	-2.16	0.462963	-1.11103	0.0001	4	0.0054	Rad21l	RAD21-like (S. pombe)	Coding
TC0500001089.mm.1	6.54	7.65	-2.16	0.462963	-1.11103	0.0491	1.30892	0.225	Gm26387	predicted gene, 26387 [Source:MGI Symbol;Acc:MGI:5456164]	Small_RNA
TC1300000244.mm.1	11.69	12.8	-2.16	0.462963	-1.11103	0.0231	1.63639	0.1473	Hist1h4h	histone cluster 1, H4h	Coding
TC0X00001048.mm.1	3.77	4.88	-2.16	0.462963	-1.11103	0.002	2.69897	0.0339			NonCoding
TC0Y00000235.mm.1	7.72	8.83	-2.16	0.462963	-1.11103	0.0098	2.00877	0.0896	Ddx3y	DEAD (Asp-Glu-Ala-Asp) box polypeptide 3, Y-linked	Multiple_Complex
TC1900001289.mm.1	11.02	12.13	-2.16	0.462963	-1.11103	0.02	1.69897	0.1361	Cbwd1	COBW domain containing 1	Multiple_Complex
TC0100001730.mm.1	6.59	7.7	-2.16	0.462963	-1.11103	0.0269	1.57025	0.1615	Cnih4	cornichon homolog 4 (Drosophila)	Multiple_Complex
TC1200000279.mm.1	8.25	9.36	-2.16	0.462963	-1.11103	0.001	3	0.0211	Nampt	nicotinamide phosphoribosyltransferase	Coding
TC1300002768.mm.1	10.14	11.25	-2.16	0.462963	-1.11103	0.0443	1.3536	0.2125	Zfp934	zinc finger protein 934	Multiple_Complex
TC0X00002423.mm.1	6.32	7.43	-2.16	0.462963	-1.11103	0.0175	1.75696	0.1265	Xlr4c	X-linked lymphocyte-regulated 4C	Multiple_Complex
TC0900002268.mm.1	6.34	7.45	-2.15	0.465116	-1.10434	0.0016	2.79588	0.0295	Pts	6-pyruvoyl-tetrahydropterin synthase	Coding
TC0X00001620.mm.1	6.4	7.51	-2.15	0.465116	-1.10434	0.023	1.63827	0.147	Gm23806	predicted gene, 23806 [Source:MGI Symbol;Acc:MGI:5453583]	Ribosomal
TC0500000578.mm.1	5.11	6.22	-2.15	0.465116	-1.10434	0.006	2.22185	0.0672			NonCoding
TC0200002127.mm.1	6.77	7.87	-2.15	0.465116	-1.10434	0.0191	1.71897	0.1327	Snrpb2	U2 small nuclear ribonucleoprotein B	Multiple_Complex
TC0200005014.mm.1	15.14	16.24	-2.14	0.46729	-1.09761	0.0303	1.51856	0.1725	Mir5111	microRNA 5111 (Mir5111), microRNA.	NonCoding
TC0100000170.mm.1	13.94	15.04	-2.14	0.46729	-1.09761	0.0267	1.57349	0.161			NonCoding
TC1400001312.mm.1	14.59	15.69	-2.14	0.46729	-1.09761	0.0409	1.38828	0.2027	Gm25781	predicted gene, 25781 [Source:MGI Symbol;Acc:MGI:5455558]	Small_RNA
TC1200000092.mm.1	7.24	8.33	-2.14	0.46729	-1.09761	0.0032	2.49485	0.046	4930511A02Rik	RIKEN cDNA 4930511A02 gene	NonCoding
TC1500001329.mm.1	6.68	7.78	-2.14	0.46729	-1.09761	0.0377	1.42366	0.1939	Snord123	small nucleolar RNA, C/D box 123	Small_RNA
TC0100000973.mm.1	7.47	8.57	-2.14	0.46729	-1.09761	0.0394	1.4045	0.1987	Gm24465	predicted gene, 24465 [Source:MGI Symbol;Acc:MGI:5454242]	Small_RNA
TC1200000427.mm.1	11.15	12.24	-2.14	0.46729	-1.09761	0.0105	1.97881	0.0933	Arhgap5	Rho GTPase activating protein 5	Multiple_Complex
TC0100001247.mm.1	12.43	13.53	-2.13	0.469484	-1.09085	0.0356	1.44855	0.1886	Gm4204	predicted gene 4204 [Source:MGI Symbol;Acc:MGI:3782381]	Coding
TC0900003068.mm.1	5.98	7.08	-2.13	0.469484	-1.09085	0.0411	1.38616	0.2036	Gm24259	predicted gene, 24259 [Source:MGI Symbol;Acc:MGI:5454036]	Small_RNA
TC0200001876.mm.1	14.83	15.92	-2.13	0.469484	-1.09085	0.0304	1.51713	0.1727	Gm22352	predicted gene, 22352 [Source:MGI Symbol;Acc:MGI:5452129]	Small_RNA
TC0300000646.mm.1	14.83	15.92	-2.13	0.469484	-1.09085	0.0304	1.51713	0.1727	Gm24584	predicted gene, 24584 [Source:MGI Symbol;Acc:MGI:5454361]	Small_RNA
TC0X00001213.mm.1	5.32	6.41	-2.13	0.469484	-1.09085	0.021	1.67778	0.1392	Cldn34c3; Gm5167	claudin 34C3 [Source:MGI Symbol;Acc:MGI:3645501]; predicted gene 5167	Multiple_Complex
TC1600000798.mm.1	5.67	6.76	-2.13	0.469484	-1.09085	0.0061	2.21467	0.068			NonCoding
TC1300000182.mm.1	5.86	6.95	-2.13	0.469484	-1.09085	0.0046	2.33724	0.0579	Hist1h4m; Hist1h4n	histone cluster 1, H4m; histone cluster 1, H4n	Coding
TC1700001189.mm.1	4.82	5.91	-2.13	0.469484	-1.09085	0.0093	2.03152	0.0867	n-R5s29	nuclear encoded rRNA 5S 29 [Source:MGI Symbol;Acc:MGI:4421874]	Ribosomal
TC0400000544.mm.1	11.96	13.04	-2.12	0.471698	-1.08406	0.0271	1.56703	0.1623	Gm22685	predicted gene, 22685 [Source:MGI Symbol;Acc:MGI:5452462]	Small_RNA
TC0200001265.mm.1	4.03	5.12	-2.12	0.471698	-1.08406	0.0139	1.85699	0.1108			NonCoding
TC0X00000742.mm.1	6.21	7.3	-2.12	0.471698	-1.08406	0.0228	1.64207	0.146	Brcc3	BRCA1/BRCA2-containing complex, subunit 3	Multiple_Complex
TC0500000200.mm.1	7.35	8.43	-2.12	0.471698	-1.08406	0.0471	1.32698	0.22	Snord93	small nucleolar RNA, C/D box 93	Multiple_Complex
TC1400001627.mm.1	9.56	10.64	-2.12	0.471698	-1.08406	0.0017	2.76955	0.0302	Appl1	adaptor protein, phosphotyrosine interaction, PH domain and leucine zipper containing 1	Multiple_Complex
TC0900001969.mm.1	6.5	7.58	-2.12	0.471698	-1.08406	0.0289	1.5391	0.1679	Gm26435	predicted gene, 26435 [Source:MGI Symbol;Acc:MGI:5456212]	Small_RNA
TC0400003452.mm.1	6.89	7.97	-2.12	0.471698	-1.08406	0.0174	1.75945	0.1259	Gm23540	predicted gene, 23540 [Source:MGI Symbol;Acc:MGI:5453317]	Small_RNA
TC1000002476.mm.1	8.24	9.32	-2.12	0.471698	-1.08406	0.0244	1.61261	0.1524	Gm25794	predicted gene, 25794 [Source:MGI Symbol;Acc:MGI:5455571]	Small_RNA
TC1400000470.mm.1	8.6	9.68	-2.11	0.473934	-1.07724	0.0252	1.5986	0.1553	Gm16439	predicted pseudogene 16439 [Source:MGI Symbol;Acc:MGI:3647611]	Pseudogene
TC0200004671.mm.1	12.06	13.14	-2.11	0.473934	-1.07724	0.0059	2.22915	0.0666	Pcna	proliferating cell nuclear antigen	Multiple_Complex
TC0400003104.mm.1	8.6	9.68	-2.11	0.473934	-1.07724	0.0005	3.30103	0.0131	Gm12696	predicted gene 12696 [Source:MGI Symbol;Acc:MGI:3649288]	Pseudogene
TC1100002837.mm.1	8.79	9.87	-2.11	0.473934	-1.07724	0.0378	1.42251	0.1941	Hist3h2bb-ps	histone cluster 3, H2bb, pseudogene	Multiple_Complex
TC0X00001837.mm.1	9.6	10.68	-2.11	0.473934	-1.07724	0.0205	1.68825	0.1376	Gm14480	predicted gene 14480 [Source:MGI Symbol;Acc:MGI:3650191]	Multiple_Complex
TC0700003798.mm.1	7.01	8.09	-2.11	0.473934	-1.07724	0.0039	2.40894	0.0516	Rps3; Snord15b	ribosomal protein S3; small nucleolar RNA, C/D box 14B	Multiple_Complex
TC1100002793.mm.1	7.37	8.44	-2.11	0.473934	-1.07724	0.0256	1.59176	0.1568	Gm24253	predicted gene, 24253 [Source:MGI Symbol;Acc:MGI:5454030]	Small_RNA
TC0200000720.mm.1	14.93	16	-2.11	0.473934	-1.07724	0.0465	1.33255	0.2182	Gm26127	predicted gene, 26127 [Source:MGI Symbol;Acc:MGI:5455904]	Small_RNA
TC0300002094.mm.1	8.48	9.55	-2.1	0.47619	-1.07039	0.0009	3.04576	0.0199	Ssr3	signal sequence receptor, gamma	Multiple_Complex
TC0900002505.mm.1	5.96	7.03	-2.1	0.47619	-1.07039	0.0034	2.46852	0.0478	Gm25313	predicted gene, 25313 [Source:MGI Symbol;Acc:MGI:5455090]	Multiple_Complex
TC0100003193.mm.1	6.16	7.23	-2.1	0.47619	-1.07039	0.0385	1.41454	0.1961	Cfh	complement component factor h	Multiple_Complex
TC0X00002996.mm.1	9.95	11.02	-2.1	0.47619	-1.07039	0.0237	1.62525	0.1499	Gm7855	predicted gene 7855 [Source:MGI Symbol;Acc:MGI:3648232]	Pseudogene
TC0400002637.mm.1	7.64	8.71	-2.09	0.478469	-1.0635	0.0342	1.46597	0.1844	Mrpl50	mitochondrial ribosomal protein L50	Coding
TC1000002556.mm.1	8.99	10.05	-2.09	0.478469	-1.0635	0.0279	1.5544	0.165	Zfp781	zinc finger protein 781 (Zfp781), mRNA.; zinc finger protein 781	Coding
TC0100000520.mm.1	7.79	8.85	-2.09	0.478469	-1.0635	0.0036	2.4437	0.0489	Gm26457	predicted gene, 26457 [Source:MGI Symbol;Acc:MGI:5456234]	Small_RNA
TC0X00001764.mm.1	5.87	6.94	-2.09	0.478469	-1.0635	0.0004	3.39794	0.0125	Ccnb3	cyclin B3	Coding
TC1500000721.mm.1	9.12	10.19	-2.09	0.478469	-1.0635	0.0397	1.40121	0.1995	Rbx1	ring-box 1	Coding
TC0200001723.mm.1	16.87	17.93	-2.09	0.478469	-1.0635	0.0126	1.89963	0.1045	Gm25189	predicted gene, 25189 [Source:MGI Symbol;Acc:MGI:5454966]	Small_RNA
TC0X00000534.mm.1	9.98	11.04	-2.08	0.480769	-1.05658	1.25e-06	5.90309	0.0003	Gm364	predicted gene 364	Coding
TC1200000134.mm.1	8.89	9.95	-2.08	0.480769	-1.05658	0.0032	2.49485	0.0457	Rock2	Rho-associated coiled-coil containing protein kinase 2; Synthetic construct Mus musculus clone IMAGE:100063319, MGC:191063 Rho-associated coiled-coil containing protein kinase 2 (Rock2) mRNA, encodes complete protein.	Multiple_Complex
TC0X00002529.mm.1	8.65	9.71	-2.08	0.480769	-1.05658	0.0002	3.69897	0.0076	Mageb16	melanoma antigen family B, 16	Coding
TC0900001926.mm.1	15.53	16.59	-2.08	0.480769	-1.05658	0.0394	1.4045	0.1987	Gm10180	predicted gene 10180 [Source:MGI Symbol;Acc:MGI:3701608]	Pseudogene
TC1000002084.mm.1	15.53	16.59	-2.08	0.480769	-1.05658	0.0394	1.4045	0.1987	Gm3699	predicted gene 3699 [Source:MGI Symbol;Acc:MGI:3781875]	Pseudogene
TC0900000862.mm.1	9.81	10.87	-2.08	0.480769	-1.05658	0.0366	1.43652	0.1905	Ppib	peptidylprolyl isomerase B	Coding
TC0200003532.mm.1	7.08	8.14	-2.08	0.480769	-1.05658	0.0013	2.88606	0.0262	Arl5a	ADP-ribosylation factor-like 5A	Multiple_Complex
TC0X00002854.mm.1	6.57	7.63	-2.08	0.480769	-1.05658	0.042	1.37675	0.2061	Gm23322	predicted gene, 23322 [Source:MGI Symbol;Acc:MGI:5453099]	Small_RNA
TC0300000575.mm.1	4.74	5.8	-2.08	0.480769	-1.05658	0.0009	3.04576	0.0197	Mir15b	microRNA 15b	Precursor_microRNA
TC1300001564.mm.1	5.7	6.75	-2.08	0.480769	-1.05658	0.0065	2.18709	0.0707	Hist1h4n; Hist1h4m	histone cluster 1, H4n (Hist1h4n), mRNA.; histone cluster 1, H4m, mRNA (cDNA clone MGC:144215 IMAGE:40099764), complete cds.; histone cluster 1, H4m, mRNA (cDNA clone MGC:171137 IMAGE:40099768), complete cds.; histone cluster 1, H4n	Coding
TC1800000313.mm.1	9.65	10.7	-2.08	0.480769	-1.05658	0.0383	1.4168	0.1957			NonCoding
TC1500001017.mm.1	6.64	7.69	-2.07	0.483092	-1.04963	0.0049	2.3098	0.0603	Aqp2	aquaporin 2	Coding
TC1000002741.mm.1	12.12	13.17	-2.07	0.483092	-1.04963	0.0429	1.36754	0.2089	Gm20091	predicted gene, 20091	Coding
TC1700001148.mm.1	9.18	10.23	-2.07	0.483092	-1.04963	0.0186	1.73049	0.1308	Gm23649	predicted gene, 23649 [Source:MGI Symbol;Acc:MGI:5453426]	Small_RNA
TC1200001206.mm.1	12.95	14	-2.07	0.483092	-1.04963	0.0221	1.65561	0.1436	Gm6988	PREDICTED: predicted gene 6988 (Gm6988), mRNA.	Coding
TC0300002561.mm.1	12.54	13.59	-2.07	0.483092	-1.04963	0.011	1.95861	0.0962	Hsd3b6	hydroxy-delta-5-steroid dehydrogenase, 3 beta- and steroid delta-isomerase 6	Coding
TC1400002210.mm.1	6.36	7.41	-2.07	0.483092	-1.04963	0.0123	1.91009	0.1027			NonCoding
TC1900000175.mm.1	14.27	15.32	-2.07	0.483092	-1.04963	0.0091	2.04096	0.0861	Pcna-ps2	proliferating cell nuclear antigen pseudogene 2 [Source:MGI Symbol;Acc:MGI:97505]	Pseudogene
TC1800000264.mm.1	14.73	15.77	-2.06	0.485437	-1.04264	0.0375	1.42597	0.1932	Gm26378	predicted gene, 26378 [Source:MGI Symbol;Acc:MGI:5456155]	Small_RNA
TC0600000946.mm.1	6.85	7.9	-2.06	0.485437	-1.04264	0.0194	1.7122	0.1336			NonCoding
TC0700002115.mm.1	15.49	16.53	-2.06	0.485437	-1.04264	0.041	1.38722	0.2033	Bc1	brain cytoplasmic RNA 1 (Bc1), non-coding RNA.	NonCoding
TC1300000954.mm.1	5.68	6.73	-2.06	0.485437	-1.04264	0.0326	1.48678	0.1798	Gm25383	predicted gene, 25383 [Source:MGI Symbol;Acc:MGI:5455160]	Small_RNA
TC0300002105.mm.1	9.73	10.77	-2.06	0.485437	-1.04264	0.0126	1.89963	0.1044	Gm26442	predicted gene, 26442 [Source:MGI Symbol;Acc:MGI:5456219]	Small_RNA
TC0700002068.mm.1	3.66	4.7	-2.06	0.485437	-1.04264	0.0076	2.11919	0.0781	Gm25370	predicted gene, 25370 [Source:MGI Symbol;Acc:MGI:5455147]	Small_RNA
TC0300001104.mm.1	7.13	8.17	-2.06	0.485437	-1.04264	0.0053	2.27572	0.0628	Dram2	DNA-damage regulated autophagy modulator 2; VDNA-damage regulated autophagy modulator 2	Multiple_Complex
TC0100001302.mm.1	7.55	8.59	-2.06	0.485437	-1.04264	0.001	3	0.0217	Zbtb41	zinc finger and BTB domain containing 41 homolog	Multiple_Complex
TC1400001442.mm.1	12.94	13.98	-2.05	0.487805	-1.03562	0.0007	3.1549	0.0178	Gm9800	predicted gene 9800 [Source:MGI Symbol;Acc:MGI:3710580]	Pseudogene
TC0X00003108.mm.1	7.36	8.4	-2.05	0.487805	-1.03562	0.0012	2.92082	0.0243	Ammecr1	Alport syndrome, mental retardation, midface hypoplasia and elliptocytosis chromosomal region gene 1; Synthetic construct Mus musculus clone IMAGE:100016345, MGC:184519 Alport syndrome, mental retardation, midface hypoplasia and elliptocytosis chromosomal region gene 1 homolog (human) (Ammecr1) mRNA, encodes complete protein.	Multiple_Complex
TC1300001165.mm.1	14.55	15.59	-2.05	0.487805	-1.03562	0.0279	1.5544	0.165	Gm24870	predicted gene, 24870 [Source:MGI Symbol;Acc:MGI:5454647]	Small_RNA
TC0X00002738.mm.1	6.09	7.12	-2.05	0.487805	-1.03562	0.0353	1.45223	0.1877	Rps4x	ribosomal protein S4, X-linked; ribosomal protein S4, X-linked (Rps4x), mRNA.	Multiple_Complex
TC0100001943.mm.1	11.81	12.85	-2.05	0.487805	-1.03562	0.0006	3.22185	0.0157	Mybl1	myeloblastosis oncogene-like 1	Multiple_Complex
TC0100001657.mm.1	10.47	11.5	-2.05	0.487805	-1.03562	0.0426	1.37059	0.2082	Gm23805	predicted gene, 23805 [Source:MGI Symbol;Acc:MGI:5453582]	Small_RNA
TC1700000190.mm.1	6.75	7.78	-2.05	0.487805	-1.03562	0.0407	1.39041	0.2024	BC002059	cDNA sequence BC002059	Multiple_Complex
TC0500000938.mm.1	9.91	10.94	-2.05	0.487805	-1.03562	0.0001	4	0.0049	Gm5560	predicted pseudogene 5560	Pseudogene
TC0600001310.mm.1	7.83	8.87	-2.05	0.487805	-1.03562	0.0447	1.34969	0.2135			NonCoding
TC1300000990.mm.1	8.41	9.44	-2.05	0.487805	-1.03562	0.0159	1.7986	0.1196	Ccnh	cyclin H	Multiple_Complex
TC0X00002459.mm.1	12.32	13.35	-2.05	0.487805	-1.03562	0.0257	1.59007	0.1572	Gm22351; Gm15365	predicted gene, 22351 [Source:MGI Symbol;Acc:MGI:5452128]; predicted gene 15365 [Source:MGI Symbol;Acc:MGI:3705398]	Multiple_Complex
TC1300001346.mm.1	9.98	11.01	-2.04	0.490196	-1.02857	0.0117	1.93181	0.0999	Paip1	polyadenylate binding protein-interacting protein 1	Multiple_Complex
TC0100000790.mm.1	13.01	14.04	-2.04	0.490196	-1.02857	0.0008	3.09691	0.0189	Ptma	prothymosin alpha	Coding
TC1500001986.mm.1	8.65	9.68	-2.04	0.490196	-1.02857	0.023	1.63827	0.1468	Gm22890	predicted gene, 22890 [Source:MGI Symbol;Acc:MGI:5452667]	Small_RNA
TC1000000029.mm.1	11.38	12.41	-2.04	0.490196	-1.02857	0.0145	1.83863	0.1137	Gm22739	predicted gene, 22739 [Source:MGI Symbol;Acc:MGI:5452516]	Small_RNA
TC0100000081.mm.1	13.81	14.84	-2.04	0.490196	-1.02857	0.025	1.60206	0.1546	Rpl5-ps1	ribosomal protein L5, pseudogene 1	Pseudogene
TC0X00000046.mm.1	15.92	16.95	-2.04	0.490196	-1.02857	0.0452	1.34486	0.2146	n-R5s2	nuclear encoded rRNA 5S 2 [Source:MGI Symbol;Acc:MGI:4421736]	Ribosomal
TC1600001695.mm.1	12.65	13.68	-2.04	0.490196	-1.02857	0.0227	1.64397	0.1456	1700026J12Rik	RIKEN cDNA 1700026J12 gene	NonCoding
TC0500000511.mm.1	6.02	7.05	-2.03	0.492611	-1.02148	0.0151	1.82102	0.1165	Gm19932	predicted gene, 19932 [Source:MGI Symbol;Acc:MGI:5012117]	Multiple_Complex
TC0X00001621.mm.1	6.42	7.44	-2.03	0.492611	-1.02148	0.0101	1.99568	0.0912	A830080D01Rik	RIKEN cDNA A830080D01 gene	Multiple_Complex
TC0200002987.mm.1	7.14	8.16	-2.03	0.492611	-1.02148	0.003	2.52288	0.0437	Trdmt1	tRNA aspartic acid methyltransferase 1	Multiple_Complex
TC0X00001684.mm.1	5.46	6.48	-2.03	0.492611	-1.02148	0.0144	1.84164	0.1132	Trappc2	trafficking protein particle complex 2	Multiple_Complex
TC0800001599.mm.1	9.79	10.8	-2.03	0.492611	-1.02148	0.0015	2.82391	0.0279	Itgb1	integrin beta 1 (fibronectin receptor beta)	Multiple_Complex
TC0Y00000236.mm.1	7.72	8.74	-2.02	0.49505	-1.01436	0.0003	3.52288	0.0101	Usp9y	ubiquitin specific peptidase 9, Y chromosome	Coding
TC0300001647.mm.1	6.13	7.15	-2.02	0.49505	-1.01436	0.0017	2.76955	0.0312	Snx16	sorting nexin 16; sorting nexin 16 (Snx16), transcript variant 2, mRNA.	Coding
TC0X00000519.mm.1	7.09	8.1	-2.02	0.49505	-1.01436	2.78e-05	4.55596	0.002	Ddx26b	DEAD/H (Asp-Glu-Ala-Asp/His) box polypeptide 26B	Multiple_Complex
TC0900001232.mm.1	8.4	9.42	-2.02	0.49505	-1.01436	0.0282	1.54975	0.1657	Rbp1	retinol binding protein 1, cellular	Coding
TC1900000726.mm.1	4.67	5.68	-2.01	0.497512	-1.0072	0.0448	1.34872	0.2137			NonCoding
TC0200002170.mm.1	6.69	7.7	-2.01	0.497512	-1.0072	0.0346	1.46092	0.1855	Naa20	N(alpha)-acetyltransferase 20, NatB catalytic subunit	Multiple_Complex
TC0600003232.mm.1	7.43	8.44	-2.01	0.497512	-1.0072	0.0006	3.22185	0.0161	Clec12b	C-type lectin domain family 12, member B	Coding
TC0300000941.mm.1	14.8	15.81	-2.01	0.497512	-1.0072	0.0219	1.65956	0.1427	Gm24136	predicted gene, 24136 [Source:MGI Symbol;Acc:MGI:5453913]	Small_RNA
TC0900002223.mm.1	6.86	7.87	-2.01	0.497512	-1.0072	0.0372	1.42946	0.1922	Gm22805	predicted gene, 22805 [Source:MGI Symbol;Acc:MGI:5452582]	Small_RNA
TC1300001942.mm.1	6.42	7.43	-2.01	0.497512	-1.0072	1.78e-05	4.74958	0.0015	Mirlet7f-1	microRNA let7f-1; microRNA let7f-1 (Mirlet7f-1), microRNA.	Multiple_Complex
TC0800002509.mm.1	13.16	14.17	-2.01	0.497512	-1.0072	0.0387	1.41229	0.1967	Gm2225	PREDICTED: predicted gene 2225 (Gm2225), miscRNA.	NonCoding
TC1600000708.mm.1	8.33	9.34	-2.01	0.497512	-1.0072	0.0028	2.55284	0.0423	Cd47	CD47 antigen (Rh-related antigen, integrin-associated signal transducer)	Multiple_Complex
TC0900002597.mm.1	8.63	9.64	-2.01	0.497512	-1.0072	0.0475	1.32331	0.2209	Gm23730	predicted gene, 23730 [Source:MGI Symbol;Acc:MGI:5453507]	Small_RNA
TC0600003170.mm.1	16.13	17.14	-2.01	0.497512	-1.0072	0.0319	1.49621	0.1777	Gm7308	predicted pseudogene 7308 [Source:MGI Symbol;Acc:MGI:3644558]	Pseudogene
TC0X00003399.mm.1	6.85	7.86	-2.01	0.497512	-1.0072	0.0186	1.73049	0.1311	Sh3bgrl	SH3-binding domain glutamic acid-rich protein like	Multiple_Complex
TC1300000255.mm.1	11.35	12.36	-2.01	0.497512	-1.0072	0.0019	2.72125	0.0324	Hist1h2bc	histone cluster 1, H2bc	Coding
TC0X00000613.mm.1	7.8	8.8	-2	0.5	-1	0.0001	4	0.0048	Fmr1	fragile X mental retardation syndrome 1	Multiple_Complex
TC1200002500.mm.1	10.8	11.8	-2	0.5	-1	0.0038	2.42022	0.0512	Gm6750	PREDICTED: predicted gene 6750 (Gm6750), mRNA.	Coding
TC1700002120.mm.1	9.61	10.61	-2	0.5	-1	0.0041	2.38722	0.0538	Cd2ap	CD2-associated protein	Multiple_Complex
TC1000001033.mm.1	12.97	11.97	2	2	1	0.003	2.52288	0.0438			NonCoding
TC1600001117.mm.1	10.8	9.79	2	2	1	0.0236	1.62709	0.1496	Crebbp	CREB binding protein; Synthetic construct Mus musculus clone IMAGE:100069545, MGC:199447 CREB binding protein (Crebbp) mRNA, encodes complete protein.	Coding
TC0100001616.mm.1	7.45	6.44	2.01	2.01	1.0072	2.88e-07	6.54061	9.93e-05	Igsf9	immunoglobulin superfamily, member 9	Multiple_Complex
TC1200002150.mm.1	13.43	12.42	2.01	2.01	1.0072	0.045	1.34679	0.2142	Cep128	centrosomal protein 128	Multiple_Complex
TC0200005181.mm.1	8.54	7.54	2.01	2.01	1.0072	0.0448	1.34872	0.2138	Znfx1	zinc finger, NFX1-type containing 1	Multiple_Complex
TC1500000534.mm.1	10.46	9.46	2.01	2.01	1.0072	0.0116	1.93554	0.0996			NonCoding
TC1100001813.mm.1	10.33	9.32	2.01	2.01	1.0072	0.0482	1.31695	0.2229	Apoh	apolipoprotein H	Coding
TC1000001609.mm.1	12.13	11.12	2.01	2.01	1.0072	0.0484	1.31515	0.2234	Smarcc2	SWI/SNF related, matrix associated, actin dependent regulator of chromatin, subfamily c, member 2	Multiple_Complex
TC0500003739.mm.1	10.07	9.06	2.01	2.01	1.0072	0.0003	3.52288	0.0098	Fbxo24	F-box protein 24	Coding
TC1700000047.mm.1	8.83	7.82	2.01	2.01	1.0072	0.0337	1.47237	0.1834	Synj2	synaptojanin 2	Multiple_Complex
TC0600003180.mm.1	14.23	13.22	2.01	2.01	1.0072	0.0014	2.85387	0.0266			NonCoding
TC1000002624.mm.1	11.26	10.25	2.02	2.02	1.01436	0.0045	2.34679	0.0568			NonCoding
TC0200002171.mm.1	10.68	9.67	2.02	2.02	1.01436	0.0059	2.22915	0.0671	Cfap61	cilia and flagella associated protein 61	Multiple_Complex
TC1000000671.mm.1	11.45	10.43	2.02	2.02	1.01436	0.0117	1.93181	0.1	Ccdc6	coiled-coil domain containing 6	Multiple_Complex
TC1100001716.mm.1	11.2	10.19	2.02	2.02	1.01436	1.36e-05	4.86646	0.0012			NonCoding
TC0800000195.mm.1	9.38	8.37	2.02	2.02	1.01436	0.001	3	0.0212			NonCoding
TC1900000108.mm.1	7.88	6.86	2.02	2.02	1.01436	0.0255	1.59346	0.1563	Atg2a	autophagy related 2A	Multiple_Complex
TC1900000061.mm.1	12.75	11.73	2.02	2.02	1.01436	0.0197	1.70553	0.135	Catsper1	cation channel, sperm associated 1; Synthetic construct Mus musculus clone IMAGE:100015059, MGC:180354 cation channel, sperm associated 1 (Catsper1) mRNA, encodes complete protein.	Coding
TC0600001485.mm.1	11.68	10.67	2.02	2.02	1.01436	0.0002	3.69897	0.0086			NonCoding
TC1000000726.mm.1	9.93	8.92	2.02	2.02	1.01436	0.045	1.34679	0.2141	Derl3	Der1-like domain family, member 3	Coding
TC0500000736.mm.1	14.6	13.58	2.02	2.02	1.01436	0.0038	2.42022	0.0514	Thegl	theg spermatid protein like	Coding
TC1300002487.mm.1	7.37	6.36	2.02	2.02	1.01436	9.8e-10	9.00877	1.62e-06			NonCoding
TC0600002697.mm.1	8.18	7.16	2.02	2.02	1.01436	0.037	1.4318	0.1918	Plxna1	plexin A1	Multiple_Complex
TC1900000160.mm.1	12.58	11.56	2.03	2.03	1.02148	0.0388	1.41117	0.197	Bscl2	Berardinelli-Seip congenital lipodystrophy 2 homolog (seipin); Bernardinelli-Seip congenital lipodystrophy 2 homolog (human)	Multiple_Complex
TC1700000259.mm.1	8.22	7.2	2.03	2.03	1.02148	0.0023	2.63827	0.0368			NonCoding
TC0700002060.mm.1	6.89	5.87	2.03	2.03	1.02148	2.58e-05	4.58838	0.0019			NonCoding
TC0900000207.mm.1	9.74	8.72	2.03	2.03	1.02148	0.0039	2.40894	0.0522	Ccdc159	coiled-coil domain containing 159	Coding
TC1200002237.mm.1	9.19	8.17	2.03	2.03	1.02148	0.0149	1.82681	0.1155	Ccdc88c	coiled-coil domain containing 88C	Multiple_Complex
TC0300001334.mm.1	6.14	5.12	2.03	2.03	1.02148	0.0012	2.92082	0.0246			NonCoding
TC1400002246.mm.1	7.29	6.27	2.03	2.03	1.02148	6.7e-11	10.1739	3.15e-07			NonCoding
TC0100000546.mm.1	7	5.98	2.03	2.03	1.02148	7.33e-08	7.1349	3.61e-05	Pth2r	parathyroid hormone 2 receptor	Coding
TC1700000448.mm.1	11.77	10.75	2.03	2.03	1.02148	0.0048	2.31876	0.0591			NonCoding
TC0400002799.mm.1	7.44	6.42	2.03	2.03	1.02148	0.0006	3.22185	0.0164	Akna	AT-hook transcription factor	Multiple_Complex
TC0700004219.mm.1	9.54	8.51	2.04	2.04	1.02857	0.0428	1.36856	0.2086	Cog7	component of oligomeric golgi complex 7	Multiple_Complex
TC1700001729.mm.1	9.88	8.85	2.04	2.04	1.02857	0.0026	2.58503	0.0406			NonCoding
TC0900000208.mm.1	7.12	6.09	2.04	2.04	1.02857	4.44e-06	5.35262	0.0006	Plppr2	phospholipid phosphatase related 2	Coding
TC1800001347.mm.1	7.54	6.51	2.04	2.04	1.02857	0.006	2.22185	0.0676			NonCoding
TC0200005256.mm.1	7.27	6.24	2.04	2.04	1.02857	2.55e-05	4.59346	0.0019			NonCoding
TC1700001798.mm.1	10.39	9.36	2.04	2.04	1.02857	0.0143	1.84466	0.1129	Btbd9	BTB (POZ) domain containing 9	Multiple_Complex
TC0200004874.mm.1	11.2	10.17	2.05	2.05	1.03562	0.0189	1.72354	0.1319	Gm14146; RP23-419G21.3	predicted gene 14146 [Source:MGI Symbol;Acc:MGI:3651552]; putative novel transcript	NonCoding
TC1400000252.mm.1	12.37	11.34	2.05	2.05	1.03562	1.48e-07	6.82974	6.51e-05	Gm2260	PREDICTED: predicted gene 2260 (Gm2260), mRNA.	Multiple_Complex
TC1400000248.mm.1	10.07	9.04	2.05	2.05	1.03562	4.95e-07	6.30539	0.0001	Anxa11	annexin A11	Multiple_Complex
TC0700002642.mm.1	9.03	8	2.05	2.05	1.03562	0.0016	2.79588	0.0295	Ccdc97	coiled-coil domain containing 97	Multiple_Complex
TC0900001473.mm.1	13.04	12.01	2.05	2.05	1.03562	1.17e-05	4.93181	0.0011	Prss46	protease, serine 46; protease, serine, 46	Coding
TC1400000255.mm.1	12.48	11.44	2.05	2.05	1.03562	8.7e-08	7.06048	4.13e-05	Gm2274	PREDICTED: predicted gene 2274 (Gm2274), mRNA.	Multiple_Complex
TC1700002022.mm.1	9.92	8.88	2.05	2.05	1.03562	0.0001	4	0.0051	Stk-ps1	serine/threonine kinase, pseudogene 1	Pseudogene
TC1700000439.mm.1	10.93	9.89	2.05	2.05	1.03562	0.0213	1.67162	0.1402			NonCoding
TC0X00000737.mm.1	14.03	12.99	2.06	2.06	1.04264	0.0034	2.46852	0.048	Gm15378	predicted gene 15378 [Source:MGI Symbol;Acc:MGI:3707457]	Multiple_Complex
TC1100003874.mm.1	12.29	11.25	2.06	2.06	1.04264	0.0006	3.22185	0.016	Lrrc37a	leucine rich repeat containing 37A	Coding
TC1000000587.mm.1	13.31	12.27	2.06	2.06	1.04264	0.0024	2.61979	0.0384			NonCoding
TC0500000726.mm.1	10.43	9.38	2.07	2.07	1.04963	0.0041	2.38722	0.0534	C530008M17Rik	RIKEN cDNA C530008M17 gene	Multiple_Complex
TC1700000431.mm.1	7.22	6.17	2.07	2.07	1.04963	6.68e-06	5.17522	0.0008	Itpr3; Mir7677	inositol 1,4,5-triphosphate receptor 3; microRNA 7677	Multiple_Complex
TC0400002451.mm.1	7.92	6.87	2.07	2.07	1.04963	0.005	2.30103	0.0604	Gm24112	predicted gene, 24112 [Source:MGI Symbol;Acc:MGI:5453889]	Precursor_microRNA
TC0600002494.mm.1	9.69	8.64	2.07	2.07	1.04963	0.0323	1.4908	0.1788	Elmod3	ELMO/CED-12 domain containing 3	Multiple_Complex
TC0200000577.mm.1	8.58	7.53	2.07	2.07	1.04963	0.025	1.60206	0.1545	Ciz1	CDKN1A interacting zinc finger protein 1; CDKN1A interacting zinc finger protein	Multiple_Complex
TC0500003008.mm.1	6.43	5.38	2.07	2.07	1.04963	1.65e-06	5.78252	0.0003	E130006D01Rik	RIKEN cDNA E130006D01 gene	NonCoding
TC0400003337.mm.1	10.7	9.65	2.07	2.07	1.04963	0.0343	1.46471	0.1846	Mast2	microtubule associated serine/threonine kinase 2	Multiple_Complex
TC0700001436.mm.1	6.86	5.81	2.07	2.07	1.04963	0.0379	1.42136	0.1945			NonCoding
TC1700001262.mm.1	12.68	11.63	2.07	2.07	1.04963	0.0359	1.44491	0.1894	Plekhh2	pleckstrin homology domain containing, family H (with MyTH4 domain) member 2	Coding
TC1400002288.mm.1	6.03	4.98	2.08	2.08	1.05658	7.35e-13	12.1337	9.69e-09	Gm10860	predicted gene 10860	NonCoding
TC0500003030.mm.1	7.47	6.41	2.08	2.08	1.05658	0.0061	2.21467	0.0678	Mir7229	microRNA 7229	Precursor_microRNA
TC1300000701.mm.1	5.84	4.78	2.08	2.08	1.05658	8.82e-05	4.05453	0.0044			NonCoding
TC0700003001.mm.1	7.59	6.53	2.08	2.08	1.05658	0.0069	2.16115	0.0733	Trpm4	transient receptor potential cation channel, subfamily M, member 4	Multiple_Complex
TC1400002359.mm.1	5.89	4.84	2.08	2.08	1.05658	0.0014	2.85387	0.0267			NonCoding
TC0700001029.mm.1	12.66	11.6	2.08	2.08	1.05658	0.0002	3.69897	0.0064			NonCoding
TC1100003159.mm.1	9.19	8.13	2.08	2.08	1.05658	0.0259	1.5867	0.1578	Ctns	cystinosis, nephropathic	Multiple_Complex
TC1700001568.mm.1	9.62	8.56	2.08	2.08	1.05658	0.0023	2.63827	0.0369	Gm7052	predicted gene 7052	Coding
TC1100003857.mm.1	9	7.94	2.08	2.08	1.05658	0.0491	1.30892	0.225	Kif18b	kinesin family member 18B	Multiple_Complex
TC0500003238.mm.1	11.07	10.01	2.08	2.08	1.05658	0.0109	1.96257	0.0954	Clip1	CAP-GLY domain containing linker protein 1	Multiple_Complex
TC0600002660.mm.1	9.17	8.11	2.08	2.08	1.05658	0.001	3	0.0211	Gm19618	PREDICTED: predicted gene, 19618 (Gm19618), mRNA.	Coding
TC0600002226.mm.1	8.66	7.6	2.09	2.09	1.0635	0.0075	2.12494	0.077			NonCoding
TC1500001845.mm.1	10.86	9.79	2.09	2.09	1.0635	0.0034	2.46852	0.0472			NonCoding
TC0900001445.mm.1	12.11	11.05	2.09	2.09	1.0635	0.0271	1.56703	0.1621	Map4	microtubule-associated protein 4	Multiple_Complex
TC0600002962.mm.1	10.47	9.41	2.09	2.09	1.0635	0.0124	1.90658	0.1035	Efcab12	EF-hand calcium binding domain 12	Coding
TC0900000769.mm.1	8.44	7.38	2.09	2.09	1.0635	0.0116	1.93554	0.0995	Uaca	uveal autoantigen with coiled-coil domains and ankyrin repeats	Coding
TC1000000982.mm.1	7.52	6.45	2.09	2.09	1.0635	0.003	2.52288	0.0438			NonCoding
TC0600001494.mm.1	12.21	11.15	2.09	2.09	1.0635	0.0006	3.22185	0.0155			NonCoding
TC0700001847.mm.1	9.03	7.97	2.09	2.09	1.0635	0.0062	2.20761	0.0686	Fbrs	fibrosin	Coding
TC1100004038.mm.1	9.01	7.94	2.09	2.09	1.0635	5.05e-05	4.29671	0.003	Cpsf4l	cleavage and polyadenylation specific factor 4-like	Multiple_Complex
TC1400002345.mm.1	7.86	6.79	2.1	2.1	1.07039	0.0166	1.77989	0.1226	Fam160b2	family with sequence similarity 160, member B2	Coding
TC0300000732.mm.1	8.53	7.47	2.1	2.1	1.07039	0.0067	2.17393	0.072	Arhgef2	rho/rac guanine nucleotide exchange factor (GEF) 2	Multiple_Complex
TC0300001123.mm.1	9.19	8.13	2.1	2.1	1.07039	0.0206	1.68613	0.1378	Eps8l3	EPS8-like 3	Coding
TC0200001441.mm.1	8.58	7.51	2.1	2.1	1.07039	0.0385	1.41454	0.1962	Chst1	carbohydrate (keratan sulfate Gal-6) sulfotransferase 1	Coding
TC1400002175.mm.1	8.09	7.02	2.1	2.1	1.07039	2.42e-06	5.61618	0.0004			NonCoding
TC1800001467.mm.1	7.34	6.27	2.1	2.1	1.07039	1.84e-10	9.73518	6.75e-07			NonCoding
TC0100002102.mm.1	10.92	9.85	2.1	2.1	1.07039	5.26e-05	4.27901	0.0031	4931408C20Rik	RIKEN cDNA 4931408C20 gene	Coding
TC0700003506.mm.1	11.83	10.75	2.11	2.11	1.07724	0.0012	2.92082	0.0242			NonCoding
TC0900002555.mm.1	9.28	8.21	2.11	2.11	1.07724	0.0062	2.20761	0.0684			NonCoding
TC0900002542.mm.1	8.26	7.18	2.11	2.11	1.07724	0.018	1.74473	0.1282	Tln2	talin 2	Multiple_Complex
TC1600001603.mm.1	11.2	10.12	2.12	2.12	1.08406	0.006	2.22185	0.0672	Maats1	MYCBP-associated, testis expressed 1	Multiple_Complex
TC0800000509.mm.1	8.62	7.54	2.12	2.12	1.08406	0.0041	2.38722	0.0535	Fat1	FAT tumor suppressor homolog 1 (Drosophila)	Multiple_Complex
TC1000001024.mm.1	10.85	9.77	2.12	2.12	1.08406	0.0199	1.70115	0.1357	Rfx4	regulatory factor X, 4 (influences HLA class II expression)	Multiple_Complex
TC0300002611.mm.1	8.67	7.59	2.12	2.12	1.08406	0.0078	2.10791	0.0788	Slc22a15	solute carrier family 22 (organic anion/cation transporter), member 15	Multiple_Complex
TC0900002468.mm.1	13.89	12.8	2.13	2.13	1.09085	0.0357	1.44733	0.1891	Pias1	protein inhibitor of activated STAT 1	Multiple_Complex
TC0500001340.mm.1	10.05	8.97	2.13	2.13	1.09085	0.0026	2.58503	0.0397	Iqcd	IQ motif containing D	Coding
TC1200000769.mm.1	9.05	7.96	2.13	2.13	1.09085	0.0032	2.49485	0.0461	Sipa1l1	signal-induced proliferation-associated 1 like 1	Multiple_Complex
TC1000001466.mm.1	9.72	8.63	2.13	2.13	1.09085	0.0245	1.61083	0.1526	Grip1	glutamate receptor interacting protein 1; glutamate receptor interacting protein 1 (Grip1), transcript variant 2, mRNA.; glutamate receptor interacting protein 1 (Grip1), transcript variant 1, mRNA.; glutamate receptor interacting protein 1 (Grip1), transcript variant 3, mRNA.	Multiple_Complex
TC1700001075.mm.1	13.73	12.64	2.13	2.13	1.09085	0.035	1.45593	0.1868	Ppp4r1	protein phosphatase 4, regulatory subunit 1	Multiple_Complex
TC0100000257.mm.1	11.9	10.81	2.13	2.13	1.09085	0.0221	1.65561	0.1434	Vwa3b	von Willebrand factor A domain containing 3B	Multiple_Complex
TC0400001715.mm.1	12.24	11.15	2.14	2.14	1.09761	0.0383	1.4168	0.1958	Eif4g3	eukaryotic translation initiation factor 4 gamma, 3	Multiple_Complex
TC1600001656.mm.1	7.58	6.48	2.14	2.14	1.09761	1.57e-12	11.8041	1.72e-08	Gm609	predicted gene 609	Multiple_Complex
TC1200002181.mm.1	10.74	9.64	2.14	2.14	1.09761	0.0089	2.05061	0.085			NonCoding
TC0900000885.mm.1	8.25	7.15	2.15	2.15	1.10434	0.0029	2.5376	0.0431	C2cd4b	C2 calcium-dependent domain containing 4B	Multiple_Complex
TCX_GL456233_random00000001.mm.1	10.21	9.11	2.15	2.15	1.10434	0.0131	1.88273	0.1069			Coding
TC1300002121.mm.1	12.33	11.23	2.15	2.15	1.10434	0.0028	2.55284	0.042	Spata31d1a	spermatogenesis associated 31 subfamily D, member 1A	Coding
TC1400002476.mm.1	10.71	9.6	2.15	2.15	1.10434	0.0205	1.68825	0.1375	Dgkh	diacylglycerol kinase, eta; diacylglycerol kinase, eta (Dgkh), transcript variant 2, non-coding RNA.	Multiple_Complex
TC0400000383.mm.1	14.48	13.37	2.15	2.15	1.10434	0.0048	2.31876	0.0596	Gm10601	predicted pseudogene 10601 [Source:MGI Symbol;Acc:MGI:3708690]	Pseudogene
TC0200004651.mm.1	7.59	6.48	2.16	2.16	1.11103	0.0039	2.40894	0.0517	Rnf24	ring finger protein 24	Multiple_Complex
TC0400000427.mm.1	8.42	7.31	2.16	2.16	1.11103	7.31e-05	4.13608	0.0038	1700022I11Rik	RIKEN cDNA 1700022I11 gene	Coding
TC1000000586.mm.1	9.72	8.61	2.16	2.16	1.11103	1.12e-05	4.95078	0.0011	Mir7215	microRNA 7215	Precursor_microRNA
TC1500001630.mm.1	11.76	10.65	2.16	2.16	1.11103	0.0148	1.82974	0.1151	Asap1	ArfGAP with SH3 domain, ankyrin repeat and PH domain1; ArfGAP with SH3 domain, ankyrin repeat and PH domain1 (Asap1), mRNA.	Multiple_Complex
TC1300000726.mm.1	12.05	10.94	2.16	2.16	1.11103	0.0044	2.35655	0.0563	Spata31d1b	spermatogenesis associated 31 subfamily D, member 1B	Coding
TC1700001549.mm.1	8.69	7.58	2.16	2.16	1.11103	0.0003	3.52288	0.01			NonCoding
TC0100003039.mm.1	12.9	11.78	2.17	2.17	1.1177	0.0145	1.83863	0.1137	Zp3r	zona pellucida 3 receptor	Coding
TC0700001026.mm.1	10.9	9.78	2.17	2.17	1.1177	0.0225	1.64782	0.1449			NonCoding
TC1500000535.mm.1	9.55	8.44	2.17	2.17	1.1177	0.0205	1.68825	0.1375			NonCoding
TC0200001423.mm.1	12.44	11.32	2.17	2.17	1.1177	0.0036	2.4437	0.0494			NonCoding
TC0100002220.mm.1	7.47	6.35	2.17	2.17	1.1177	0.0003	3.52288	0.0095			NonCoding
TC1700002345.mm.1	8.26	7.13	2.18	2.18	1.12433	4.08e-06	5.38934	0.0006	Slc25a41	solute carrier family 25, member 41	Coding
TC1600002090.mm.1	12.89	11.76	2.18	2.18	1.12433	0.0011	2.95861	0.023	4930563D23Rik	RIKEN cDNA 4930563D23 gene	Coding
TC0700004191.mm.1	10.97	9.85	2.18	2.18	1.12433	0.0102	1.9914	0.0917	Dnah3	dynein, axonemal, heavy chain 3	Coding
TC1900000776.mm.1	9.68	8.55	2.18	2.18	1.12433	0.0008	3.09691	0.0187	Acsl5	acyl-CoA synthetase long-chain family member 5	Coding
TC1900001101.mm.1	10.52	9.4	2.18	2.18	1.12433	1.49e-08	7.82681	1.08e-05			NonCoding
TC0500001197.mm.1	13.3	12.17	2.19	2.19	1.13093	9.21e-06	5.03574	0.001			NonCoding
TC0900000200.mm.1	11.24	10.11	2.19	2.19	1.13093	0.0337	1.47237	0.1834	Carm1	coactivator-associated arginine methyltransferase 1	Multiple_Complex
TC1900000659.mm.1	6.91	5.77	2.2	2.2	1.1375	7.45e-05	4.12784	0.0039			NonCoding
TC0400002070.mm.1	7.89	6.75	2.21	2.21	1.14405	0.0289	1.5391	0.1678			NonCoding
TC0400000391.mm.1	12.5	11.36	2.21	2.21	1.14405	0.0282	1.54975	0.1658	Gm13298; Fam205a4; Gm20938	predicted gene 13298 (Gm13298), mRNA.; family with sequence similarity 205, member A4 [Source:MGI Symbol;Acc:MGI:5434294]; predicted gene, 20938	Coding
TC1700000054.mm.1	7.93	6.79	2.21	2.21	1.14405	0.0254	1.59517	0.156			NonCoding
TC0500003078.mm.1	12.83	11.69	2.21	2.21	1.14405	3.56e-06	5.44855	0.0005			NonCoding
TC1700000261.mm.1	12.07	10.93	2.21	2.21	1.14405	0.0006	3.22185	0.0156	Gm7732	predicted gene 7732	Coding
TC0200000492.mm.1	14.82	13.67	2.21	2.21	1.14405	0.0042	2.37675	0.0548	Ak8	adenylate kinase 8	Multiple_Complex
TC0900003110.mm.1	8.56	7.42	2.21	2.21	1.14405	0.0121	1.91721	0.1017	Ptpn23	protein tyrosine phosphatase, non-receptor type 23	Coding
TC0400004158.mm.1	11.54	10.39	2.21	2.21	1.14405	0.0293	1.53313	0.1692	Cptp	ceramide-1-phosphate transfer protein	Multiple_Complex
TC1900000730.mm.1	11.67	10.52	2.21	2.21	1.14405	0.0158	1.80134	0.1196	Cfap58	cilia and flagella associated protein 58	Coding
TC0800001065.mm.1	6.36	5.21	2.21	2.21	1.14405	0.0002	3.69897	0.007			NonCoding
TC1500000983.mm.1	14.48	13.33	2.22	2.22	1.15056	0.0437	1.35952	0.211	Ccdc65	coiled-coil domain containing 65	Coding
TC0100003069.mm.1	8.09	6.95	2.22	2.22	1.15056	0.0025	2.60206	0.0392	Cdk18	cyclin-dependent kinase 18	Coding
TC1700000692.mm.1	10.79	9.64	2.22	2.22	1.15056	0.0412	1.3851	0.204	Cchcr1	coiled-coil alpha-helical rod protein 1	Multiple_Complex
TC0200005234.mm.1	5.98	4.83	2.22	2.22	1.15056	4.3e-12	11.3665	3.37e-08			NonCoding
TC1100003769.mm.1	7.93	6.78	2.22	2.22	1.15056	0.0003	3.52288	0.0107	Jup	junction plakoglobin	Multiple_Complex
TC1700001950.mm.1	10.52	9.36	2.22	2.22	1.15056	0.007	2.1549	0.074	Prrc2a	proline-rich coiled-coil 2A	Multiple_Complex
TC1100000587.mm.1	14.38	13.23	2.23	2.23	1.15704	0.0081	2.09151	0.0798	Gm12206	predicted gene 12206 [Source:MGI Symbol;Acc:MGI:3650472]	Multiple_Complex
TC0800000333.mm.1	13.25	12.09	2.23	2.23	1.15704	0.0142	1.84771	0.1126	Kcnu1	potassium channel, subfamily U, member 1	Coding
TC0100000374.mm.1	16.56	15.4	2.23	2.23	1.15704	0.0178	1.74958	0.1274	Stat4	signal transducer and activator of transcription 4	Coding
TC1100003061.mm.1	11.24	10.08	2.23	2.23	1.15704	0.0495	1.30539	0.2258	Polr2a	polymerase (RNA) II (DNA directed) polypeptide A (Polr2a), mRNA.; polymerase (RNA) II (DNA directed) polypeptide A	Multiple_Complex
TC0400000405.mm.1	11.66	10.5	2.23	2.23	1.15704	0.0179	1.74715	0.128	Gm13298; Fam205a3; Gm21598	predicted gene 13298 (Gm13298), mRNA.; family with sequence similarity 205, member A3 [Source:MGI Symbol;Acc:MGI:5434953]; predicted gene, 21598	Coding
TC0400002501.mm.1	11.66	10.5	2.23	2.23	1.15704	0.0179	1.74715	0.128	Gm13298; Fam205a2	predicted gene 13298 (Gm13298), mRNA.; family with sequence similarity 205, member A2 [Source:MGI Symbol;Acc:MGI:3701946]; predicted gene 13298	Coding
TC1100000880.mm.1	9.87	8.71	2.24	2.24	1.1635	0.0186	1.73049	0.1308	Myh10	myosin, heavy polypeptide 10, non-muscle	Multiple_Complex
TC0700001432.mm.1	7.67	6.51	2.24	2.24	1.1635	0.0071	2.14874	0.0746	Pde2a	phosphodiesterase 2A, cGMP-stimulated	Coding
TC0900002452.mm.1	11.17	10.01	2.24	2.24	1.1635	0.0169	1.77211	0.124	Paqr5	progestin and adipoQ receptor family member V	Multiple_Complex
TC0500003114.mm.1	12.54	11.38	2.24	2.24	1.1635	0.0164	1.78516	0.1217			NonCoding
TC1100004072.mm.1	8.62	7.45	2.25	2.25	1.16993	0.0033	2.48149	0.047	Mir3968	microRNA 3968	Precursor_microRNA
TC1000000723.mm.1	10.42	9.25	2.25	2.25	1.16993	0.0004	3.39794	0.0121			NonCoding
TC0700004304.mm.1	6.54	5.37	2.25	2.25	1.16993	0.0053	2.27572	0.0633			NonCoding
TC0900002250.mm.1	6.54	5.37	2.25	2.25	1.16993	0.012	1.92082	0.1013			NonCoding
TC0500001154.mm.1	9.49	8.32	2.26	2.26	1.17632	0.0147	1.83268	0.115			NonCoding
TC1400002334.mm.1	10.75	9.57	2.26	2.26	1.17632	0.0123	1.91009	0.1029	Sorbs3	sorbin and SH3 domain containing 3	Coding
TC0400003717.mm.1	8.88	7.7	2.26	2.26	1.17632	0.0222	1.65365	0.144	Rps6ka1	ribosomal protein S6 kinase polypeptide 1	Multiple_Complex
TC0700002978.mm.1	11.54	10.36	2.26	2.26	1.17632	0.0167	1.77728	0.1231	Ap2a1	adaptor-related protein complex 2, alpha 1 subunit	Multiple_Complex
TC1200000961.mm.1	12.28	11.11	2.26	2.26	1.17632	0.0483	1.31605	0.2231			NonCoding
TC1700001087.mm.1	9.9	8.72	2.26	2.26	1.17632	0.0389	1.41005	0.1971			NonCoding
TC0900003235.mm.1	13.79	12.62	2.26	2.26	1.17632	0.0029	2.5376	0.0431	Slc22a14	solute carrier family 22 (organic cation transporter), member 14	Coding
TC0100000637.mm.1	10.92	9.74	2.27	2.27	1.18269	0.0302	1.51999	0.1724	Plcd4	phospholipase C, delta 4	Multiple_Complex
TC0900002204.mm.1	8.61	7.42	2.27	2.27	1.18269	0.0337	1.47237	0.1833	Cep164	centrosomal protein 164	Multiple_Complex
TC0200004930.mm.1	11.41	10.23	2.28	2.28	1.18903	0.0046	2.33724	0.0576	Nol4l	nucleolar protein 4-like	Multiple_Complex
TC1700001399.mm.1	11.44	10.25	2.28	2.28	1.18903	0.0312	1.50585	0.1754	Ttll2	tubulin tyrosine ligase-like family, member 2	Coding
TC0500001198.mm.1	13.4	12.21	2.28	2.28	1.18903	6.38e-07	6.19518	0.0002			NonCoding
TC1100004271.mm.1	9.18	7.99	2.28	2.28	1.18903	0.0464	1.33348	0.2179	Gm11492	predicted gene 11492 [Source:MGI Symbol;Acc:MGI:3651136]; predicted gene 11492	Coding
TC1100001064.mm.1	6.27	5.08	2.28	2.28	1.18903	0.0008	3.09691	0.0184			NonCoding
TC0100002827.mm.1	6.72	5.53	2.28	2.28	1.18903	8.31e-05	4.0804	0.0042	Kif1a	kinesin family member 1A	Multiple_Complex
TC0100003282.mm.1	9.38	8.19	2.29	2.29	1.19535	0.0002	3.69897	0.0086	Rgsl1	regulator of G-protein signaling like 1	Multiple_Complex
TC0800001063.mm.1	6.49	5.29	2.29	2.29	1.19535	0.0017	2.76955	0.0311			NonCoding
TC0800001824.mm.1	9.59	8.39	2.3	2.3	1.20163	9.67e-05	4.01457	0.0047			NonCoding
TC0500003393.mm.1	11.22	10.02	2.3	2.3	1.20163	0.001	3	0.0213	Pom121	nuclear pore membrane protein 121	Multiple_Complex
TC0700004482.mm.1	9.58	8.38	2.3	2.3	1.20163	0.0228	1.64207	0.1462	Cfap46	cilia and flagella associated protein 46	Multiple_Complex
TC1600001222.mm.1	10.83	9.63	2.3	2.3	1.20163	0.0021	2.67778	0.0348	Gm6327	predicted gene 6327	Coding
TC0500000033.mm.1	8.17	6.96	2.31	2.31	1.20789	0.0002	3.69897	0.008			NonCoding
TC0700003511.mm.1	12.26	11.05	2.31	2.31	1.20789	0.0128	1.89279	0.1053			NonCoding
TC0700004281.mm.1	14.64	13.43	2.31	2.31	1.20789	0.0152	1.81816	0.117	Atxn2l	ataxin 2-like	Coding
TC0700002910.mm.1	8.9	7.69	2.31	2.31	1.20789	0.0081	2.09151	0.0803	Gm9252	predicted gene 9252 [Source:MGI Symbol;Acc:MGI:3645130]	Pseudogene
TC1000001035.mm.1	11.32	10.11	2.31	2.31	1.20789	0.0341	1.46725	0.1841			NonCoding
TC0700003627.mm.1	7.61	6.4	2.32	2.32	1.21412	6.5e-10	9.18709	1.37e-06			NonCoding
TC0500001501.mm.1	6.69	5.48	2.32	2.32	1.21412	2.89e-06	5.5391	0.0005	Adgrd1	adhesion G protein-coupled receptor D1	Multiple_Complex
TC0300003092.mm.1	12.41	11.2	2.32	2.32	1.21412	0.0071	2.14874	0.0748			NonCoding
TC0100002602.mm.1	10.8	9.59	2.32	2.32	1.21412	0.0207	1.68403	0.1381	Atg9a	autophagy related 9A; autophagy related 9A (Atg9a), mRNA.	Multiple_Complex
TC1000000130.mm.1	7.6	6.38	2.32	2.32	1.21412	0.0008	3.09691	0.0188			NonCoding
TC0200000493.mm.1	5.83	4.62	2.32	2.32	1.21412	6.56e-05	4.1831	0.0036	Mir3088	microRNA 3088	Precursor_microRNA
TC0900001686.mm.1	11.67	10.46	2.33	2.33	1.22033	0.0338	1.47108	0.1836			NonCoding
TC1800001492.mm.1	12.07	10.85	2.33	2.33	1.22033	5.16e-06	5.28735	0.0007			NonCoding
TC0100000787.mm.1	13.25	12.01	2.35	2.35	1.23266	0.029	1.5376	0.1682	1700019O17Rik	RIKEN cDNA 1700019O17 gene	Coding
TC1600000036.mm.1	10.61	9.37	2.35	2.35	1.23266	0.014	1.85387	0.1114	4930562C15Rik	RIKEN cDNA 4930562C15 gene	Multiple_Complex
TC0800002041.mm.1	10.95	9.71	2.35	2.35	1.23266	8.77e-06	5.057	0.0009			NonCoding
TC1500000589.mm.1	8.21	6.97	2.36	2.36	1.23879	0.0016	2.79588	0.0289			NonCoding
TC0300002901.mm.1	8.69	7.45	2.36	2.36	1.23879	0.0028	2.55284	0.0418	Ank2	ankyrin 2, brain	Multiple_Complex
TC0400004173.mm.1	7.99	6.75	2.36	2.36	1.23879	0.0355	1.44977	0.1883	Plekhn1	pleckstrin homology domain containing, family N member 1	Coding
TC0200000087.mm.1	11.35	10.11	2.37	2.37	1.24489	0.0083	2.08092	0.0809	Sfmbt2	Scm-like with four mbt domains 2	Multiple_Complex
TC1100001626.mm.1	13.13	11.88	2.37	2.37	1.24489	0.0117	1.93181	0.1	Ttc25	tetratricopeptide repeat domain 25	Multiple_Complex
TC0700001406.mm.1	9.59	8.34	2.37	2.37	1.24489	0.0119	1.92445	0.101	C2cd3	C2 calcium-dependent domain containing 3	Multiple_Complex
TC1700000633.mm.1	11.14	9.89	2.38	2.38	1.25096	0.0074	2.13077	0.0767			NonCoding
TC0200002587.mm.1	10.61	9.36	2.39	2.39	1.25701	0.0292	1.53462	0.169	Slc9a8	solute carrier family 9 (sodium/hydrogen exchanger), member 8; solute carrier family 9 (sodium/hydrogen exchanger), member 8 (Slc9a8), transcript variant 2, mRNA.	Multiple_Complex
TC0500001270.mm.1	8.32	7.07	2.39	2.39	1.25701	0.0171	1.767	0.1249	Cit	citron	Multiple_Complex
TC1700000019.mm.1	6.6	5.34	2.39	2.39	1.25701	5.21e-10	9.28316	1.23e-06			NonCoding
TC0400000736.mm.1	7.91	6.65	2.4	2.4	1.26303	0.0108	1.96658	0.0952	Pappa	pregnancy-associated plasma protein A	Multiple_Complex
TC0400003381.mm.1	11.72	10.46	2.4	2.4	1.26303	0.0069	2.16115	0.0736	Ipo13	importin 13	Multiple_Complex
TC1500000536.mm.1	11.91	10.65	2.4	2.4	1.26303	0.0117	1.93181	0.1002			NonCoding
TC1900001103.mm.1	6.92	5.65	2.4	2.4	1.26303	4.76e-05	4.32239	0.0029			NonCoding
TC0100001060.mm.1	11.18	9.91	2.41	2.41	1.26903	0.0474	1.32422	0.2206	Clasp1	CLIP associating protein 1 (Clasp1), transcript variant 1, mRNA.; CLIP associating protein 1; CLIP associating protein 1 (Clasp1), transcript variant 2, mRNA.	Multiple_Complex
TC0900001807.mm.1	8.12	6.84	2.42	2.42	1.27501	0.006	2.22185	0.0672			NonCoding
TC0800001356.mm.1	7.84	6.56	2.42	2.42	1.27501	5.34e-07	6.27246	0.0001	4930571O06Rik	RIKEN cDNA 4930571O06 gene	NonCoding
TC0700002717.mm.1	13.94	12.66	2.42	2.42	1.27501	0.0186	1.73049	0.1309	Catsperg1	catsper channel auxiliary subunit gamma 1	Multiple_Complex
TC0900001808.mm.1	9.85	8.57	2.43	2.43	1.28096	1.9e-05	4.72125	0.0015			NonCoding
TC0700002956.mm.1	8.52	7.24	2.44	2.44	1.28688	1.59e-07	6.7986	6.81e-05	Acpt	acid phosphatase, testicular	Coding
TC0100000921.mm.1	8.38	7.1	2.44	2.44	1.28688	0.0002	3.69897	0.0084	Rnpepl1	arginyl aminopeptidase (aminopeptidase B)-like 1	Multiple_Complex
TC0900003273.mm.1	10.04	8.75	2.44	2.44	1.28688	0.0026	2.58503	0.0403	Ccdc13	coiled-coil domain containing 13	Multiple_Complex
TC0500003565.mm.1	11.06	9.77	2.45	2.45	1.29278	0.0096	2.01773	0.0884	Ankrd61	ankyrin repeat domain 61	Coding
TC0800000045.mm.1	16.01	14.72	2.45	2.45	1.29278	0.0322	1.49214	0.1787	Gm1840	predicted gene 1840 [Source:MGI Symbol;Acc:MGI:3037698]	Coding
TC0400001608.mm.1	8.82	7.53	2.45	2.45	1.29278	0.001	3	0.0211	Slc9a1; Mir5122	solute carrier family 9 (sodium/hydrogen exchanger), member 1; microRNA 5122	Multiple_Complex
TC0100000813.mm.1	15.03	13.73	2.45	2.45	1.29278	0.0369	1.43297	0.1914	Efhd1	EF hand domain containing 1	Multiple_Complex
TC0400000387.mm.1	13.29	11.99	2.45	2.45	1.29278	0.0079	2.10237	0.0788	Gm13302	predicted gene 13302 [Source:MGI Symbol;Acc:MGI:3705777]	Pseudogene
TC1100003071.mm.1	10.19	8.89	2.46	2.46	1.29866	6.43e-06	5.19179	0.0008	Tmem95	transmembrane protein 95	Multiple_Complex
TC1800000791.mm.1	9.73	8.44	2.46	2.46	1.29866	0.011	1.95861	0.0958	Myo5b	myosin VB	Multiple_Complex
TC1400002054.mm.1	8.24	6.94	2.46	2.46	1.29866	0.0078	2.10791	0.0788	Slc7a7	solute carrier family 7 (cationic amino acid transporter, y+ system), member 7	Coding
TC1700002177.mm.1	10.19	8.89	2.46	2.46	1.29866	0.0367	1.43533	0.1908	Ttbk1	tau tubulin kinase 1	Coding
TC1500001650.mm.1	7.25	5.95	2.46	2.46	1.29866	0.0339	1.4698	0.1836			NonCoding
TC1500002192.mm.1	7.88	6.58	2.47	2.47	1.30451	0.0022	2.65758	0.0367	Kmt2d	lysine (K)-specific methyltransferase 2D	Multiple_Complex
TC0800001396.mm.1	8.77	7.47	2.47	2.47	1.30451	3.84e-05	4.41567	0.0025	Bco1	beta-carotene oxygenase 1	Coding
TC0900002551.mm.1	11.72	10.42	2.47	2.47	1.30451	0.0032	2.49485	0.0462			NonCoding
TC0500003669.mm.1	12.2	10.9	2.47	2.47	1.30451	0.0003	3.52288	0.0097			NonCoding
TC0600001094.mm.1	12.16	10.86	2.47	2.47	1.30451	0.0118	1.92812	0.1003	4930590J08Rik	RIKEN cDNA 4930590J08 gene	Coding
TC1000000870.mm.1	10.66	9.36	2.47	2.47	1.30451	0.0134	1.8729	0.1086	Dot1l	DOT1-like, histone H3 methyltransferase (S. cerevisiae); Synthetic construct Mus musculus clone IMAGE:100068096, MGC:195713 DOT1-like, histone H3 methyltransferase (S. cerevisiae) (Dot1l) mRNA, encodes complete protein.	Multiple_Complex
TC4_JH584293_random00000011.mm.1	13.65	12.34	2.48	2.48	1.31034	0.0054	2.26761	0.0637			Coding
TC0400003207.mm.1	11.02	9.71	2.48	2.48	1.31034	0.0442	1.35458	0.2121	Mroh7	maestro heat-like repeat family member 7	Multiple_Complex
TC1700001624.mm.1	10.9	9.58	2.49	2.49	1.31615	0.0335	1.47496	0.1826	Abca17	ATP-binding cassette, sub-family A (ABC1), member 17	Coding
TC1700000262.mm.1	12.33	11.02	2.49	2.49	1.31615	0.0004	3.39794	0.0128	Gm7736	predicted gene 7736	Coding
TC0800001420.mm.1	10.53	9.21	2.49	2.49	1.31615	0.0007	3.1549	0.0171	Osgin1	oxidative stress induced growth inhibitor 1	Multiple_Complex
TC0100002823.mm.1	9.37	8.04	2.5	2.5	1.32193	0.0179	1.74715	0.1281	Ankmy1	ankyrin repeat and MYND domain containing 1	Coding
TC0500001196.mm.1	11.49	10.16	2.5	2.5	1.32193	0.0001	4	0.006			NonCoding
TC0500003079.mm.1	11.49	10.16	2.5	2.5	1.32193	0.0001	4	0.006			NonCoding
TC0200004934.mm.1	13.95	12.62	2.5	2.5	1.32193	0.0042	2.37675	0.0541	Sun5	Sad1 and UNC84 domain containing 5	Multiple_Complex
TC1300000155.mm.1	6.46	5.13	2.51	2.51	1.32769	0.0014	2.85387	0.0267			NonCoding
TC4_GL456350_random00000010.mm.1	12.86	11.53	2.51	2.51	1.32769	0.0243	1.61439	0.1521	Fam205a2; Gm10600	family with sequence similarity 205, member A2; predicted gene 10600	Coding
TC1500000748.mm.1	13.46	12.14	2.51	2.51	1.32769	6.53e-05	4.18509	0.0036	Wbp2nl	WBP2 N-terminal like	Coding
TC0600003533.mm.1	9.13	7.8	2.51	2.51	1.32769	0.0044	2.35655	0.0562	Ttll3	tubulin tyrosine ligase-like family, member 3	Multiple_Complex
TC0700001555.mm.1	10.66	9.33	2.51	2.51	1.32769	0.0384	1.41567	0.1959	Timm10b; Dnhd1	translocase of inner mitochondrial membrane 10B; dynein heavy chain domain 1	Multiple_Complex
TC0900002040.mm.1	9.45	8.12	2.52	2.52	1.33342	0.0049	2.3098	0.06	Pknox2	Pbx/knotted 1 homeobox 2; Pbx/knotted 1 homeobox 2 (Pknox2), transcript variant 2, mRNA.	Multiple_Complex
TC1500002032.mm.1	12.61	11.28	2.52	2.52	1.33342	0.0228	1.64207	0.146	Ttll8; Gm20621	tubulin tyrosine ligase-like family, member 8; predicted gene 20621	Multiple_Complex
TC0400002492.mm.1	10.2	8.87	2.52	2.52	1.33342	0.0029	2.5376	0.043			NonCoding
TC0900001806.mm.1	9.92	8.58	2.52	2.52	1.33342	0.0027	2.56864	0.041			NonCoding
TC0400003730.mm.1	12.9	11.56	2.53	2.53	1.33914	1.1e-05	4.95861	0.0011	Catsper4	cation channel, sperm associated 4	Multiple_Complex
TC1300002112.mm.1	8.15	6.8	2.54	2.54	1.34483	2.38e-10	9.62342	8.26e-07			NonCoding
TC0X00001715.mm.1	7.75	6.4	2.54	2.54	1.34483	2.18e-09	8.66154	2.71e-06	Gm21887	predicted gene, 21887 [Source:MGI Symbol;Acc:MGI:5434051]	Coding
TC0200004875.mm.1	14.08	12.74	2.55	2.55	1.3505	0.0046	2.33724	0.0577	4921509C19Rik	RIKEN cDNA 4921509C19 gene	Coding
TC1100001345.mm.1	9.68	8.33	2.55	2.55	1.3505	0.0238	1.62342	0.1502	Mtmr4	myotubularin related protein 4	Multiple_Complex
TC0500000193.mm.1	12.57	11.22	2.55	2.55	1.3505	0.0102	1.9914	0.0917	Gm17434	PREDICTED: predicted gene, 17434 (Gm17434), mRNA.	Coding
TC0800002415.mm.1	8.51	7.16	2.55	2.55	1.3505	0.0153	1.81531	0.1173			NonCoding
TC0700000024.mm.1	11.58	10.23	2.56	2.56	1.35614	0.0014	2.85387	0.0268	Leng8	leukocyte receptor cluster (LRC) member 8	Multiple_Complex
TC1300000575.mm.1	9.78	8.43	2.56	2.56	1.35614	0.0094	2.02687	0.0874	Gm270	PREDICTED: predicted gene 270 (Gm270), mRNA.	Coding
TC1000002300.mm.1	12.55	11.19	2.56	2.56	1.35614	0.0162	1.79048	0.1207			NonCoding
TC1700001464.mm.1	10.77	9.41	2.56	2.56	1.35614	0.0305	1.5157	0.1733	Gm11166	predicted gene 11166; predicted gene 11166 (Gm11166), non-coding RNA.	Multiple_Complex
TC0300002349.mm.1	10.33	8.97	2.57	2.57	1.36177	0.0113	1.94692	0.0975	Dcst1	DC-STAMP domain containing 1	Multiple_Complex
TC0400003896.mm.1	11.39	10.03	2.57	2.57	1.36177	0.0123	1.91009	0.103	Fhad1	forkhead-associated (FHA) phosphopeptide binding domain 1	Multiple_Complex
TC1700000402.mm.1	12.63	11.27	2.57	2.57	1.36177	0.0089	2.05061	0.0849	Tmem8	transmembrane protein 8 (five membrane-spanning domains)	Coding
TC0500003446.mm.1	7.98	6.61	2.59	2.59	1.37295	0.0001	4	0.0055	Zan	zonadhesin	Multiple_Complex
TC1200001045.mm.1	6.76	5.38	2.59	2.59	1.37295	3.24e-14	13.4895	9.31e-10	Serpina3l-ps	serine (or cysteine) peptidase inhibitor, clade A, member 3L, pseudogene	Pseudogene
TC0700002828.mm.1	15.85	14.47	2.6	2.6	1.37851	0.0217	1.66354	0.1422	Gpi1	glucose phosphate isomerase 1; glucose phosphate isomerase 1 (Gpi1), mRNA.	Multiple_Complex
TC1400000071.mm.1	7.83	6.45	2.6	2.6	1.37851	0.0046	2.33724	0.0573	Flnb	filamin, beta	Multiple_Complex
TC0200001430.mm.1	9.28	7.9	2.61	2.61	1.38405	0.0117	1.93181	0.0998			NonCoding
TC0900003162.mm.1	4.93	3.54	2.62	2.62	1.38957	0.0074	2.13077	0.0761	Mir5128	microRNA 5128	Precursor_microRNA
TC1100001284.mm.1	17.5	16.11	2.62	2.62	1.38957	0.004	2.39794	0.0531	Gm23564	predicted gene, 23564 [Source:MGI Symbol;Acc:MGI:5453341]	Precursor_microRNA
TSUnmapped00000001.mm.1	7.91	6.51	2.63	2.63	1.39506	1.22e-06	5.91364	0.0003	Plppr2	phospholipid phosphatase related 2	Coding
TC0100001367.mm.1	12.97	11.57	2.63	2.63	1.39506	0.0094	2.02687	0.0872	Apobec4	apolipoprotein B mRNA editing enzyme, catalytic polypeptide-like 4 (putative); Synthetic construct Mus musculus clone IMAGE:100064103, MGC:193474 apolipoprotein B mRNA editing enzyme, catalytic polypeptide-like 4 (putative) (Apobec4) mRNA, encodes complete protein.	Coding
TC0300000787.mm.1	7.46	6.06	2.63	2.63	1.39506	0.0015	2.82391	0.0285	Dennd4b	DENN/MADD domain containing 4B	Multiple_Complex
TC0200000562.mm.1	10.47	9.07	2.64	2.64	1.40054	0.0124	1.90658	0.1033	Nup214; Mir7674	nucleoporin 214; microRNA 7674	Multiple_Complex
TC0600001489.mm.1	12.68	11.28	2.64	2.64	1.40054	0.0011	2.95861	0.0236			NonCoding
TC1800000525.mm.1	12.37	10.97	2.64	2.64	1.40054	0.0059	2.22915	0.0666	Zfp474	zinc finger protein 474	Coding
TC0200001437.mm.1	11.89	10.49	2.64	2.64	1.40054	0.0015	2.82391	0.0287			NonCoding
TC1200000866.mm.1	9.48	8.08	2.65	2.65	1.40599	0.002	2.69897	0.034	Tmem63c	transmembrane protein 63c	Coding
TC1100000908.mm.1	7.64	6.24	2.65	2.65	1.40599	2.55e-05	4.59346	0.0019	Kcnab3	potassium voltage-gated channel, shaker-related subfamily, beta member 3	Multiple_Complex
TC1400002293.mm.1	9.01	7.6	2.65	2.65	1.40599	0.0006	3.22185	0.015	Dock5	dedicator of cytokinesis 5	Multiple_Complex
TC1100002405.mm.1	10.1	8.69	2.65	2.65	1.40599	0.0008	3.09691	0.0191			NonCoding
TC1500002346.mm.1	9.41	8	2.65	2.65	1.40599	0.0057	2.24413	0.0656	Plec	plectin	Coding
TC1700000263.mm.1	11.89	10.48	2.65	2.65	1.40599	0.0003	3.52288	0.0091	Gm7742	predicted gene 7742	Coding
TC1700001731.mm.1	14.71	13.3	2.66	2.66	1.41143	0.0028	2.55284	0.0421			NonCoding
TC0700000407.mm.1	10	8.59	2.66	2.66	1.41143	0.0061	2.21467	0.0683	Zfp526	zinc finger protein 526	Coding
TC0600001150.mm.1	7.57	6.16	2.66	2.66	1.41143	0.0002	3.69897	0.0077			NonCoding
TC0100000803.mm.1	8.06	6.64	2.67	2.67	1.41684	0.0004	3.39794	0.0127			NonCoding
TC1500002031.mm.1	9.31	7.89	2.67	2.67	1.41684	0.0055	2.25964	0.0639	Alg12	asparagine-linked glycosylation 12 (alpha-1,6-mannosyltransferase)	Multiple_Complex
TC0100001654.mm.1	15.04	13.62	2.69	2.69	1.42761	0.0324	1.48945	0.1793	Wdr64	WD repeat domain 64	Coding
TC1000000610.mm.1	10.28	8.85	2.69	2.69	1.42761	0.0022	2.65758	0.0366			NonCoding
TC1600000221.mm.1	9.74	8.31	2.7	2.7	1.43296	0.0159	1.7986	0.1196	Smpd4	sphingomyelin phosphodiesterase 4	Multiple_Complex
TC0500002084.mm.1	11.08	9.64	2.7	2.7	1.43296	0.0031	2.50864	0.0447	4931409K22Rik	RIKEN cDNA 4931409K22 gene	Multiple_Complex
TC0100000620.mm.1	7.62	6.18	2.71	2.71	1.43829	7.99e-08	7.09745	3.84e-05			NonCoding
TC1700001105.mm.1	11.35	9.91	2.71	2.71	1.43829	0.0142	1.84771	0.1123	Epb41l3	erythrocyte membrane protein band 4.1 like 3	Multiple_Complex
TC0500001452.mm.1	8.67	7.23	2.72	2.72	1.44361	0.0036	2.4437	0.0496	Dnah10	dynein, axonemal, heavy chain 10	Coding
TC1700000163.mm.1	7.87	6.43	2.72	2.72	1.44361	0.0004	3.39794	0.0118	Gm7168	predicted gene 7168	Coding
TC0100001204.mm.1	8.4	6.96	2.72	2.72	1.44361	0.0022	2.65758	0.0364	Plekha6	pleckstrin homology domain containing, family A member 6	Multiple_Complex
TC1900001093.mm.1	13.68	12.23	2.73	2.73	1.4489	0.0206	1.68613	0.138	Best1	bestrophin 1	Multiple_Complex
TC0300000573.mm.1	11.15	9.71	2.73	2.73	1.4489	4.08e-05	4.38934	0.0026	Gm20690	predicted gene 20690 [Source:MGI Symbol;Acc:MGI:5313137]	Multiple_Complex
TC1600001513.mm.1	9.61	8.16	2.73	2.73	1.4489	5.44e-05	4.2644	0.0032			NonCoding
TC1700001465.mm.1	9.87	8.42	2.74	2.74	1.45418	0.0043	2.36653	0.055	Unc93a; Gm9992	unc-93 homolog A (C. elegans); predicted gene 9992	Coding
TC0800001670.mm.1	9.92	8.46	2.75	2.75	1.45943	0.0166	1.77989	0.1228			NonCoding
TC0400000497.mm.1	9.86	8.4	2.75	2.75	1.45943	0.027	1.56864	0.1619	Ccdc180	coiled-coil domain containing 180	Multiple_Complex
TC1400002620.mm.1	15.17	13.71	2.75	2.75	1.45943	0.0177	1.75203	0.127	Prr30	proline rich 30	Coding
TC1500001591.mm.1	14.04	12.57	2.75	2.75	1.45943	4.51e-05	4.34582	0.0028			NonCoding
TC0600001120.mm.1	17.58	16.12	2.76	2.76	1.46467	0.004	2.39794	0.0528	Gm23364	predicted gene, 23364 [Source:MGI Symbol;Acc:MGI:5453141]	Precursor_microRNA
TC1300002343.mm.1	17.58	16.12	2.76	2.76	1.46467	0.004	2.39794	0.0528	Gm24025	predicted gene, 24025 [Source:MGI Symbol;Acc:MGI:5453802]	Precursor_microRNA
TC0400002460.mm.1	14.38	12.91	2.77	2.77	1.46989	0.0135	1.86967	0.109	Ubap2	ubiquitin-associated protein 2	Multiple_Complex
TC1000002372.mm.1	9.01	7.54	2.77	2.77	1.46989	0.0031	2.50864	0.0447	Rsph14	radial spoke head homolog 14 (Chlamydomonas)	Multiple_Complex
TC0400003572.mm.1	13.16	11.69	2.77	2.77	1.46989	0.0331	1.48017	0.1812	CK137956	cDNA sequence CK137956	Coding
TC0200003312.mm.1	11.95	10.47	2.79	2.79	1.48027	0.0207	1.68403	0.1382	Cfap157	cilia and flagella associated protein 157	Multiple_Complex
TC0400004166.mm.1	11.64	10.16	2.79	2.79	1.48027	0.0145	1.83863	0.1137	Ttll10	tubulin tyrosine ligase-like family, member 10; Synthetic construct Mus musculus clone IMAGE:100068144, MGC:195761 tubulin tyrosine ligase-like family, member 10 (Ttll10) mRNA, encodes complete protein.	Multiple_Complex
TC0200001418.mm.1	9.63	8.15	2.79	2.79	1.48027	9.83e-05	4.00745	0.0047			NonCoding
TC1100001905.mm.1	8.7	7.21	2.8	2.8	1.48543	0.0284	1.54668	0.1663	Tmem94	transmembrane protein 94	Multiple_Complex
TC0400002073.mm.1	11.34	9.85	2.8	2.8	1.48543	0.047	1.3279	0.2196	Cfap74	cilia and flagella associated protein 74	Multiple_Complex
TC1600000565.mm.1	9.07	7.59	2.8	2.8	1.48543	0.0001	4	0.0054	Gm22500	predicted gene, 22500 [Source:MGI Symbol;Acc:MGI:5452277]	Small_RNA
TC0700004483.mm.1	10.02	8.53	2.81	2.81	1.49057	0.0118	1.92812	0.1002	Cfap46	cilia and flagella associated protein 46	Multiple_Complex
TC1000002867.mm.1	9.34	7.85	2.81	2.81	1.49057	0.0032	2.49485	0.0461	Gm22186	predicted gene, 22186 [Source:MGI Symbol;Acc:MGI:5451963]	Small_RNA
TC0100002596.mm.1	13.83	12.34	2.82	2.82	1.4957	0.0221	1.65561	0.1434	Ccdc108	coiled-coil domain containing 108	Multiple_Complex
TC0600001487.mm.1	12.94	11.45	2.82	2.82	1.4957	0.0027	2.56864	0.0412			NonCoding
TC1900000954.mm.1	11.98	10.47	2.84	2.84	1.50589	0.0248	1.60555	0.154	Pacs1	phosphofurin acidic cluster sorting protein 1	Coding
TC1500001476.mm.1	17.64	16.14	2.84	2.84	1.50589	0.0049	2.3098	0.0602	Gm23562	predicted gene, 23562 [Source:MGI Symbol;Acc:MGI:5453339]	Precursor_microRNA
TC1100001125.mm.1	13.8	12.29	2.84	2.84	1.50589	0.0224	1.64975	0.1448	Git1	G protein-coupled receptor kinase-interactor 1	Multiple_Complex
TC0200004713.mm.1	8.89	7.39	2.84	2.84	1.50589	0.0134	1.8729	0.1085	Jag1	jagged 1	Multiple_Complex
TC1200002060.mm.1	10.11	8.6	2.85	2.85	1.51096	0.018	1.74473	0.1282	Gm17673	predicted gene, 17673 [Source:MGI Symbol;Acc:MGI:4937307]	Coding
TC1500001701.mm.1	10.19	8.68	2.85	2.85	1.51096	0.022	1.65758	0.1431	Mroh5	maestro heat-like repeat family member 5	Multiple_Complex
TC0900002220.mm.1	12.15	10.63	2.86	2.86	1.51602	0.014	1.85387	0.1114	4931429L15Rik	RIKEN cDNA 4931429L15 gene	Coding
TC1300000148.mm.1	10.47	8.95	2.87	2.87	1.52105	1.41e-06	5.85078	0.0003	Elmo1	engulfment and cell motility 1; engulfment and cell motility 1 (Elmo1), transcript variant 2, non-coding RNA.	Multiple_Complex
TC0300002355.mm.1	6.39	4.85	2.89	2.89	1.53107	4.13e-07	6.38405	0.0001	Chrnb2	cholinergic receptor, nicotinic, beta polypeptide 2 (neuronal)	Coding
TC0700002668.mm.1	6	4.47	2.9	2.9	1.53605	2.55e-09	8.59346	2.95e-06			NonCoding
TC0500000258.mm.1	13.04	11.5	2.9	2.9	1.53605	0.0128	1.89279	0.1054	Gm17695	PREDICTED: predicted gene, 17695 (Gm17695), mRNA.	Coding
TC1700001479.mm.1	12.22	10.69	2.9	2.9	1.53605	0.0016	2.79588	0.0295	Gm7356	PREDICTED: predicted gene 7356 (Gm7356), mRNA.	Coding
TC1100001894.mm.1	13.92	12.38	2.9	2.9	1.53605	0.0179	1.74715	0.128	Trim80	tripartite motif-containing 80	Coding
TC0800000008.mm.1	10.22	8.68	2.91	2.91	1.54102	0.0054	2.26761	0.0637	1700019B03Rik	RIKEN cDNA 1700019B03 gene	Coding
TC0800000945.mm.1	9.28	7.73	2.93	2.93	1.5509	0.0099	2.00436	0.0902	Rfx1	regulatory factor X, 1 (influences HLA class II expression)	Coding
TC0900001572.mm.1	8.86	7.3	2.93	2.93	1.5509	0.0059	2.22915	0.0669	Dlec1	deleted in lung and esophageal cancer 1	Multiple_Complex
TC0100003111.mm.1	10.86	9.31	2.93	2.93	1.5509	0.008	2.09691	0.0797	Mgat4e	MGAT4 family, member E	Multiple_Complex
TC1400000367.mm.1	15.02	13.47	2.94	2.94	1.55582	0.0032	2.49485	0.0461	Antxrl	anthrax toxin receptor-like	Multiple_Complex
TC1700002786.mm.1	13.25	11.69	2.95	2.95	1.56071	7.2e-05	4.14267	0.0038	Ly6g6c	lymphocyte antigen 6 complex, locus G6C	Coding
TC0300000761.mm.1	12.86	11.29	2.96	2.96	1.5656	0.0049	2.3098	0.0602	Dcst2	PREDICTED: DC-STAMP domain containing 2 (Dcst2), mRNA.	Coding
TC0200003311.mm.1	10.47	8.91	2.96	2.96	1.5656	0.0201	1.6968	0.1365	Ttc16	tetratricopeptide repeat domain 16	Multiple_Complex
TC0400002075.mm.1	11.4	9.83	2.97	2.97	1.57046	0.0326	1.48678	0.1798	Cfap74; C030017K20Rik	cilia and flagella associated protein 74; RIKEN cDNA C030017K20 gene	Multiple_Complex
TC1700001732.mm.1	14.53	12.96	2.97	2.97	1.57046	0.001	3	0.022			NonCoding
TC0200003885.mm.1	10.37	8.8	2.98	2.98	1.57531	0.0004	3.39794	0.0122	P2rx3	purinergic receptor P2X, ligand-gated ion channel, 3	Multiple_Complex
TC1700001480.mm.1	12.82	11.25	2.98	2.98	1.57531	0.0009	3.04576	0.0205	Gm7358	PREDICTED: predicted gene 7358 (Gm7358), mRNA.	Coding
TC0700002727.mm.1	15.18	13.6	2.99	2.99	1.58015	0.0427	1.36957	0.2084	Catsperg2	catsper channel auxiliary subunit gamma 2	Coding
TC0400002059.mm.1	11.44	9.85	3	3	1.58496	0.0029	2.5376	0.0427	Mmel1	membrane metallo-endopeptidase-like 1	Multiple_Complex
TC0700000531.mm.1	8.43	6.84	3	3	1.58496	2.64e-05	4.5784	0.002	4930432E11Rik	RIKEN cDNA 4930432E11 gene	Coding
TC0200002237.mm.1	15.57	13.98	3.01	3.01	1.58976	0.0035	2.45593	0.0485	Gm14151; Gm14147	predicted gene 14151; predicted gene 14147	Coding
TC0500003037.mm.1	12.33	10.73	3.03	3.03	1.59932	0.0224	1.64975	0.1445			NonCoding
TC1700000260.mm.1	10.15	8.54	3.04	3.04	1.60407	0.0142	1.84771	0.1126	Gm6811	predicted gene 6811	Coding
TC1800000240.mm.1	11.65	10.05	3.04	3.04	1.60407	0.0124	1.90658	0.1033	Sap130	Sin3A associated protein	Multiple_Complex
TC0200003325.mm.1	16.17	14.57	3.05	3.05	1.60881	0.0015	2.82391	0.0283	Gm25998	predicted gene, 25998 [Source:MGI Symbol;Acc:MGI:5455775]	Precursor_microRNA
TC0100000242.mm.1	10.19	8.57	3.06	3.06	1.61353	0.0002	3.69897	0.0068	Fer1l5	fer-1-like 5 (C. elegans)	Multiple_Complex
TC0100003803.mm.1	13.61	12	3.06	3.06	1.61353	0.0137	1.86328	0.1098	Fam71a	family with sequence similarity 71, member A	Coding
TC0700001025.mm.1	13.43	11.81	3.07	3.07	1.61824	0.0283	1.54821	0.1662			NonCoding
TC1600000446.mm.1	9.94	8.32	3.07	3.07	1.61824	0.0058	2.23657	0.0665	Zdhhc19	zinc finger, DHHC domain containing 19	Multiple_Complex
TC1100002185.mm.1	14.35	12.72	3.1	3.1	1.63227	0.0013	2.88606	0.026	Gm11981	predicted gene 11981	NonCoding
TC0700001734.mm.1	10.64	9	3.13	3.13	1.64616	0.0201	1.6968	0.1363	Vwa3a	von Willebrand factor A domain containing 3A	Multiple_Complex
TC1700001400.mm.1	10.41	8.76	3.13	3.13	1.64616	0.0099	2.00436	0.0903	Gm9992	predicted gene 9992	Coding
TC0Y00000223.mm.1	9.52	7.87	3.14	3.14	1.65076	2.37e-09	8.62525	2.84e-06	Erdr1	erythroid differentiation regulator 1	Coding
TC1100003044.mm.1	10.49	8.83	3.15	3.15	1.65535	0.0137	1.86328	0.11	Dnah2	dynein, axonemal, heavy chain 2	Multiple_Complex
TC0700004075.mm.1	8.66	7.01	3.15	3.15	1.65535	0.003	2.52288	0.0443	Trim66	tripartite motif-containing 66	Multiple_Complex
TC0400001699.mm.1	17.48	15.82	3.15	3.15	1.65535	0.0045	2.34679	0.0572	Gm25399	predicted gene, 25399 [Source:MGI Symbol;Acc:MGI:5455176]	Precursor_microRNA
TC1500000787.mm.1	10.04	8.37	3.16	3.16	1.65992	1.08e-05	4.96658	0.0011	Parvg	parvin, gamma	Multiple_Complex
TC1400001889.mm.1	15.23	13.57	3.16	3.16	1.65992	0.0169	1.77211	0.1239			NonCoding
TC0800002139.mm.1	9.89	8.23	3.17	3.17	1.66448	2.33e-05	4.63264	0.0018	Gm2366	predicted gene 2366	NonCoding
TC0400003826.mm.1	9.04	7.38	3.17	3.17	1.66448	0.0075	2.12494	0.0771	Vwa5b1	von Willebrand factor A domain containing 5B1	Multiple_Complex
TC1100001234.mm.1	10.35	8.69	3.18	3.18	1.66903	0.0019	2.72125	0.0333	Fndc8	fibronectin type III domain containing 8	Coding
TC1700000174.mm.1	10.5	8.83	3.19	3.19	1.67356	0.0009	3.04576	0.0206			NonCoding
TC1100000094.mm.1	11.12	9.43	3.22	3.22	1.68706	0.0152	1.81816	0.1172	Zmiz2	zinc finger, MIZ-type containing 2	Multiple_Complex
TC1400001674.mm.1	10.56	8.87	3.22	3.22	1.68706	0.0418	1.37882	0.2059	Dnah1	dynein, axonemal, heavy chain 1	Coding
TC0500003672.mm.1	13.2	11.51	3.23	3.23	1.69153	0.017	1.76955	0.1242			NonCoding
TC1700001733.mm.1	10.55	8.83	3.3	3.3	1.72247	0.0012	2.92082	0.0242			NonCoding
TC0100001262.mm.1	8.53	6.81	3.3	3.3	1.72247	0.0005	3.30103	0.0131	Kif21b	kinesin family member 21B	Multiple_Complex
TC0700001058.mm.1	14.35	12.63	3.31	3.31	1.72683	0.0375	1.42597	0.1931			NonCoding
TC0400004194.mm.1	12.48	10.75	3.31	3.31	1.72683	0.0131	1.88273	0.107	Ubr4	ubiquitin protein ligase E3 component n-recognin 4	Multiple_Complex
TC1700001780.mm.1	7.55	5.82	3.32	3.32	1.73118	5.65e-07	6.24795	0.0002	Cpne5	copine V	Multiple_Complex
TC0100001226.mm.1	12.92	11.19	3.33	3.33	1.73552	0.0039	2.40894	0.0515	4933406M09Rik	RIKEN cDNA 4933406M09 gene	Coding
TC1000000560.mm.1	13.77	12.02	3.36	3.36	1.74846	0.0023	2.63827	0.037	Tbata	thymus, brain and testes associated; thymus, brain and testes associated (Tbata), transcript variant 3, mRNA.	Multiple_Complex
TC1700002337.mm.1	13.35	11.59	3.37	3.37	1.75275	0.0457	1.34008	0.2161	Rfx2	regulatory factor X, 2 (influences HLA class II expression)	Coding
TC0600003152.mm.1	8.78	7.02	3.4	3.4	1.76553	8.55e-06	5.06803	0.0009			NonCoding
TC0100000419.mm.1	11.28	9.48	3.48	3.48	1.79909	3.54e-06	5.451	0.0005			NonCoding
TC0500001355.mm.1	10.82	9.02	3.49	3.49	1.80323	0.0137	1.86328	0.1102	Gm15800	predicted gene 15800	Multiple_Complex
TC0200004854.mm.1	16.15	14.35	3.49	3.49	1.80323	0.0054	2.26761	0.0633	Gm14151	predicted gene 14151 (Gm14151), mRNA.; predicted gene 14151	Multiple_Complex
TC0500003031.mm.1	10.99	9.18	3.51	3.51	1.81147	0.0091	2.04096	0.0859			NonCoding
TC0700003510.mm.1	9.53	7.72	3.51	3.51	1.81147	0.0049	2.3098	0.0601			NonCoding
TC0400002023.mm.1	12.39	10.57	3.53	3.53	1.81967	0.0209	1.67985	0.1388	Chd5	chromodomain helicase DNA binding protein 5	Multiple_Complex
TC0700001030.mm.1	11.07	9.25	3.54	3.54	1.82375	0.0023	2.63827	0.0369			NonCoding
TC0700002170.mm.1	16.44	14.61	3.56	3.56	1.83188	0.0035	2.45593	0.0483	Fam71e2	family with sequence similarity 71, member E2	Coding
TC0700004526.mm.1	12.32	10.49	3.56	3.56	1.83188	0.026	1.58503	0.1581	Lmntd2	lamin tail domain containing 2	Coding
TC0800001317.mm.1	12.09	10.25	3.58	3.58	1.83996	0.0074	2.13077	0.0765	Hydin	HYDIN, axonemal central pair apparatus protein	Multiple_Complex
TC0300002818.mm.1	10.06	8.22	3.59	3.59	1.84398	9.61e-06	5.01728	0.001	1700061I17Rik	RIKEN cDNA 1700061I17 gene	Multiple_Complex
TC1100001484.mm.1	13.32	11.48	3.59	3.59	1.84398	0.0172	1.76447	0.1252	Ttll6	tubulin tyrosine ligase-like family, member 6	Coding
TC0600000939.mm.1	13.53	11.67	3.62	3.62	1.85599	0.0088	2.05552	0.0843	Ankrd53	ankyrin repeat domain 53	Coding
TC0400003632.mm.1	12.39	10.51	3.69	3.69	1.88362	0.044	1.35655	0.2117			NonCoding
TC0800001298.mm.1	11.02	9.12	3.73	3.73	1.89918	0.0007	3.1549	0.0172	Pkd1l3	polycystic kidney disease 1 like 3	Multiple_Complex
TC1000002234.mm.1	11.5	9.6	3.73	3.73	1.89918	1.07e-05	4.97062	0.0011	Slc29a3	solute carrier family 29 (nucleoside transporters), member 3	Multiple_Complex
TC0600001493.mm.1	15.48	13.54	3.84	3.84	1.94111	0.0128	1.89279	0.1054			NonCoding
TC0600003197.mm.1	11.85	9.89	3.9	3.9	1.96347	0.0429	1.36754	0.209			NonCoding
TC1100004151.mm.1	12.07	10.1	3.92	3.92	1.97085	0.0229	1.64016	0.1466	Dnah17	dynein, axonemal, heavy chain 17	Coding
TC0100001263.mm.1	8.03	6.06	3.92	3.92	1.97085	0.0001	4	0.0058			NonCoding
TC0200001424.mm.1	12.58	10.6	3.95	3.95	1.98185	0.0002	3.69897	0.0086			NonCoding
TC0900002896.mm.1	11.74	9.75	3.97	3.97	1.98914	0.0012	2.92082	0.024	Trim42	tripartite motif-containing 42	Coding
TC0500000337.mm.1	11.62	9.56	4.17	4.17	2.06005	0.0139	1.85699	0.1111	Plb1	phospholipase B1	Multiple_Complex
TC1500001590.mm.1	12.36	10.29	4.17	4.17	2.06005	0.0385	1.41454	0.1962			NonCoding
TC1700001454.mm.1	10.53	8.45	4.24	4.24	2.08406	0.0051	2.29243	0.0612	Mas1	MAS1 oncogene	Coding
TC0700003509.mm.1	12.33	10.23	4.27	4.27	2.09424	0.0099	2.00436	0.0903			NonCoding
TC0400001700.mm.1	15.25	13.06	4.56	4.56	2.18903	0.0042	2.37675	0.0548	Gm23263	predicted gene, 23263 [Source:MGI Symbol;Acc:MGI:5453040]	Precursor_microRNA
TC1100002776.mm.1	10.8	8.58	4.64	4.64	2.21412	0.0029	2.5376	0.0428	Slc36a3	solute carrier family 36 (proton/amino acid symporter), member 3	Coding
TC0600001486.mm.1	11.28	9.01	4.82	4.82	2.26903	0.0308	1.51145	0.1741			NonCoding
TC1500000738.mm.1	13.12	10.81	4.96	4.96	2.31034	0.0024	2.61979	0.0384	4930407I10Rik	RIKEN cDNA 4930407I10 gene	Coding
TC0200001436.mm.1	9.74	7.36	5.23	5.23	2.38681	0.0282	1.54975	0.1659			NonCoding
TC0100000639.mm.1	11.5	9.05	5.46	5.46	2.4489	0.006	2.22185	0.0675	Stk36	serine/threonine kinase 36	Multiple_Complex
TC0800000761.mm.1	14.2	11.5	6.47	6.47	2.69377	0.0491	1.30892	0.225	Gm16486	PREDICTED: predicted gene 16486 (Gm16486), mRNA.	Coding

## Sheet: Actn-related genes
ID	Hipk4-/- Avg (log2)	WT Avg (log2)	Fold Change	P-val	FDR P-val	Gene Symbol	Description	Group		ref
TC0700000462.mm.1	5.72	8.82	-8.57	7.67e-16	5.06e-11	Hipk4	homeodomain interacting protein kinase 4	Coding
TC0300002619.mm.1	14.42	16.23	-3.52	0.0248	0.1537	Sycp1	synaptonemal complex protein 1	Coding
TC0X00001118.mm.1	8.07	9.85	-3.44	0.0068	0.0728	Tex16; L1Md-Gf21	testis expressed gene 16; PREDICTED: L1 repeat, Gf subfamily, member 21 (L1Md-Gf21), miscRNA.	Multiple_Complex
TC0500001096.mm.1	8.93	10.66	-3.32	0.0126	0.1045	Ccdc18	coiled-coil domain containing 18	Multiple_Complex
TC0X00002709.mm.1	8.21	9.89	-3.18	0.0051	0.0616	Tex11	testis expressed gene 11	Coding
TC0X00001120.mm.1	7.28	8.84	-2.94	0.004	0.0529	Tex16	testis expressed gene 16	Coding
TC1700002250.mm.1	12.24	13.78	-2.91	0.0002	0.0083	Dazl	deleted in azoospermia-like; deleted in azoospermia-like (Dazl), mRNA.	Coding		RNA binding protein, necessary for meiosis. [Nuceic Acids Res. (2001)Venables, 29, 2479-2483]. [BIOLOGY OF REPRODUCTION 66, 475–485 (2002)]
TC1000002660.mm.1	10.18	11.71	-2.89	0.0491	0.225	Actr6	ARP6 actin-related protein 6	Coding		function unknown. 35-55% homology with actin may regulate cell shape motility…
TC1100001021.mm.1	9.18	10.71	-2.89	0.0105	0.0935	Spata22; Olfr20	spermatogenesis associated 22; olfactory receptor 20	Coding
TC0600000134.mm.1	8.62	10.08	-2.76	0.0451	0.2145	Capza2	capping protein (actin filament) muscle Z-line, alpha 2	Multiple_Complex
[truncated: 40 more rows]
