# Supplementary material for: HIPK4 is essential for murine spermiogenesis
Source: bioRxiv preprint, doi:10.1101/703637, version 1 (2019-07-16)
Supplement: Figure 6 – source data 1 [file 703637_file04.xlsx]

## Sheet: Phosphosites - all detected
annotation	ref	site	res	peptide	site_on_peptide	motif_pep	spectral_count	ascore	xcorr	dcn	dcn2	pep_score	co-occurring_sites	peptide_forms	monoModCount	bisModCount	trisModCount	red	pep_no_mods	seq_db	ascore_search_id	ascore_scans_id	ascore_peptide_id	ascore_charge	ascore_run_id	sequest_search_id	sequest_peptide_id	sequest_scans_id	sequest_scanf	sequest_charge	sequest_run_id	precision	pep_score_search_id	pep_score_peptide_id	pep_score_scans_id	pep_score_scanf	pep_score_charge	red_url	mascot_url	sequest_url	msms_url	ascore_url	TMTSum	Correl	Frac126 - untransduced	Frac127 - Hipk4	Frac128 - K40S	Frac129 - Y175F	127:128
Homeodomain-interacting protein kinase 4 OS=Mus musculus GN=Hipk4 PE=1 SV=2	sp|Q3V016|HIPK4_MOUSE	175	Y	YVKEPY|79.97|IQSR	1	RYVKEPY*IQSRFY	9	47.58	3.8903	0.2048	0.3388	92.85	NO OTHERS:9	YVKEPY|79.97|IQSR	9	0	0	0	YVKEPYIQSR	ind_MOUSE.Tryp.TMT.REVUniprot20150423.CONTAM.fasta.hdr	21636	16836	2933	3		21638	6189	16834	13149	3	16836	0.99	21634	78477	16839	13149	2	https://kronos.stanford.edu/cgi-bin/blast_html4?Db=/seq_db/static/ind_MOUSE.Tryp.TMT.REVUniprot20150423.CONTAM.fasta.hdr&Pep=YVKEPYIQSR&MassType=0	https://kronos.stanford.edu/gfy/www/modules/show_out/show_out_wrapper.php?run_id=&search_id=&scans_id=&peptide_id=&scanf=&charge=	https://kronos.stanford.edu/gfy/www/modules/show_out/show_out_wrapper.php?run_id=16836&search_id=21638&scans_id=16834&peptide_id=6189&scanf=13149&charge=3	http://kronos.stanford.edu/gfy/www/modules/sdig/index.php?run_id=16836&search_id=21638&scans_id=16834&peptide_id=6189&scanf=13149	http:/kronos.stanford.edu/gfy/www/modules/ascore/visual/trim-phos.php?run_id=&search_id=21636&scans_id=16836&peptide_id=2933&charge=3	9.47251e+07	0.808556	0.00462601	0.44621	0.000497619	0.00233756	896.691
Protein Ahnak OS=Mus musculus GN=Ahnak PE=1 SV=1	tr|E9Q616|E9Q616_MOUSE	234	S	AGAISAS|79.97|GPELEGAGHSK	1	AGAISAS*GPELEG	3	6.06	3.7674	0.0461	0.3676	71.4	NO OTHERS:3	NONE > ascore = 13	3	0	0	0	AGAISASGPELEGAGHSK	ind_MOUSE.Tryp.TMT.REVUniprot20150423.CONTAM.fasta.hdr	21638	16834	5995	3	16836	21638	5995	16834	13042	3	16836	0.99	21638	5995	16834	13042	3	https://kronos.stanford.edu/cgi-bin/blast_html4?Db=/seq_db/static/ind_MOUSE.Tryp.TMT.REVUniprot20150423.CONTAM.fasta.hdr&Pep=AGAISASGPELEGAGHSK&MassType=0	https://kronos.stanford.edu/gfy/www/modules/show_out/show_out_wrapper.php?run_id=&search_id=&scans_id=&peptide_id=&scanf=&charge=	https://kronos.stanford.edu/gfy/www/modules/show_out/show_out_wrapper.php?run_id=16836&search_id=21638&scans_id=16834&peptide_id=5995&scanf=13042&charge=3	http://kronos.stanford.edu/gfy/www/modules/sdig/index.php?run_id=16836&search_id=21638&scans_id=16834&peptide_id=5995&scanf=13042	http:/kronos.stanford.edu/gfy/www/modules/ascore/visual/trim-phos.php?run_id=16836&search_id=21638&scans_id=16834&peptide_id=5995&charge=3	1.40732e+07	0.985122	0.0266358	0.728079	0.00251036	0.0450972	290.03
Heterogeneous nuclear ribonucleoprotein L (Fragment) OS=Mus musculus GN=Hnrnpl PE=4 SV=1	tr|G5E924|G5E924_MOUSE	317	S	GFPSVDS|79.97|R	1	GFPSVDS*RGSCAP	2	65.16	1.8108	0.3961	0.3961	37.75	NO OTHERS:2	GFPSVDS|79.97|R	2	0	0	0	GFPSVDSR	ind_MOUSE.Tryp.TMT.REVUniprot20150423.CONTAM.fasta.hdr	21638	16834	8477	2	16836	21638	8477	16834	14399	2	16836	0.99	21638	8477	16834	14399	2	https://kronos.stanford.edu/cgi-bin/blast_html4?Db=/seq_db/static/ind_MOUSE.Tryp.TMT.REVUniprot20150423.CONTAM.fasta.hdr&Pep=GFPSVDSR&MassType=0	https://kronos.stanford.edu/gfy/www/modules/show_out/show_out_wrapper.php?run_id=&search_id=&scans_id=&peptide_id=&scanf=&charge=	https://kronos.stanford.edu/gfy/www/modules/show_out/show_out_wrapper.php?run_id=16836&search_id=21638&scans_id=16834&peptide_id=8477&scanf=14399&charge=2	http://kronos.stanford.edu/gfy/www/modules/sdig/index.php?run_id=16836&search_id=21638&scans_id=16834&peptide_id=8477&scanf=14399	http:/kronos.stanford.edu/gfy/www/modules/ascore/visual/trim-phos.php?run_id=16836&search_id=21638&scans_id=16834&peptide_id=8477&charge=2	6.11265e+06	0.991289	0.0135037	0.756258	0.00820964	0.015051	92.1182
Nuclear factor NF-kappa-B p100 subunit OS=Mus musculus GN=Nfkb2 PE=1 SV=1	sp|Q9WTK5|NFKB2_MOUSE	812	S	KTPS|79.97|PSGSLLR	1	TYRKTPS*PSGSLL	1	13.27	1.7892	0.0652	0.4513	41.54	NO OTHERS:1	KTPS|79.97|PSGSLLR	1	0	0	0	KTPSPSGSLLR	ind_MOUSE.Tryp.TMT.REVUniprot20150423.CONTAM.fasta.hdr	21634	16839	229	2	16841	21634	229	16839	10078	2	16841	0.99	21634	229	16839	10078	2	https://kronos.stanford.edu/cgi-bin/blast_html4?Db=/seq_db/static/ind_MOUSE.Tryp.TMT.REVUniprot20150423.CONTAM.fasta.hdr&Pep=KTPSPSGSLLR&MassType=0	https://kronos.stanford.edu/gfy/www/modules/show_out/show_out_wrapper.php?run_id=&search_id=&scans_id=&peptide_id=&scanf=&charge=	https://kronos.stanford.edu/gfy/www/modules/show_out/show_out_wrapper.php?run_id=16841&search_id=21634&scans_id=16839&peptide_id=229&scanf=10078&charge=2	http://kronos.stanford.edu/gfy/www/modules/sdig/index.php?run_id=16841&search_id=21634&scans_id=16839&peptide_id=229&scanf=10078	http:/kronos.stanford.edu/gfy/www/modules/ascore/visual/trim-phos.php?run_id=16841&search_id=21634&scans_id=16839&peptide_id=229&charge=2	3.6186e+06	0.986255	0.0323708	0.737052	0.00802807	0.0284929	91.8093
Vimentin OS=Mus musculus GN=Vim PE=1 SV=1	tr|A0A0A6YWC8|A0A0A6YWC8_MOUSE	26	S	MFGGSGTSSRPSS|79.97|NR	1	TSSRPSS*NRSYVT	2	7.93	2.6611	0.1814	0.2438	41.76	NO OTHERS:2	NONE > ascore = 13	2	0	0	2	MFGGSGTSSRPSSNR	ind_MOUSE.Tryp.TMT.REVUniprot20150423.CONTAM.fasta.hdr	21634	16839	70724	2		21636	74429	16836	6314	3	16838	0.99	21634	70724	16839	6314	2	https://kronos.stanford.edu/cgi-bin/blast_html4?Db=/seq_db/static/ind_MOUSE.Tryp.TMT.REVUniprot20150423.CONTAM.fasta.hdr&Pep=MFGGSGTSSRPSSNR&MassType=0	https://kronos.stanford.edu/gfy/www/modules/show_out/show_out_wrapper.php?run_id=&search_id=&scans_id=&peptide_id=&scanf=&charge=	https://kronos.stanford.edu/gfy/www/modules/show_out/show_out_wrapper.php?run_id=16838&search_id=21636&scans_id=16836&peptide_id=74429&scanf=6314&charge=3	http://kronos.stanford.edu/gfy/www/modules/sdig/index.php?run_id=16838&search_id=21636&scans_id=16836&peptide_id=74429&scanf=6314	http:/kronos.stanford.edu/gfy/www/modules/ascore/visual/trim-phos.php?run_id=&search_id=21634&scans_id=16839&peptide_id=70724&charge=2	1.07917e+07	0.989649	0.0165957	0.755325	0.0102008	0.0190043	74.0459
Coronin-1B OS=Mus musculus GN=Coro1b PE=1 SV=1	sp|Q9WUM3|COR1B_MOUSE	421	S	NVLSDSRPASYS|79.97|R	1	SRPASYS*RSGAST	1	0	2.1746	0.0196	0.2327	40	NO OTHERS:1	NONE > ascore = 13	1	0	0	0	NVLSDSRPASYSR	ind_MOUSE.Tryp.TMT.REVUniprot20150423.CONTAM.fasta.hdr	21637	16835	80474	3	16837	21637	80474	16835	7849	3	16837	0.99	21637	80474	16835	7849	3	https://kronos.stanford.edu/cgi-bin/blast_html4?Db=/seq_db/static/ind_MOUSE.Tryp.TMT.REVUniprot20150423.CONTAM.fasta.hdr&Pep=NVLSDSRPASYSR&MassType=0	https://kronos.stanford.edu/gfy/www/modules/show_out/show_out_wrapper.php?run_id=&search_id=&scans_id=&peptide_id=&scanf=&charge=	https://kronos.stanford.edu/gfy/www/modules/show_out/show_out_wrapper.php?run_id=16837&search_id=21637&scans_id=16835&peptide_id=80474&scanf=7849&charge=3	http://kronos.stanford.edu/gfy/www/modules/sdig/index.php?run_id=16837&search_id=21637&scans_id=16835&peptide_id=80474&scanf=7849	http:/kronos.stanford.edu/gfy/www/modules/ascore/visual/trim-phos.php?run_id=16837&search_id=21637&scans_id=16835&peptide_id=80474&charge=3	2.3981e+06	0.990341	0.0261161	0.715027	0.0113922	0.0317008	62.7646
Talin-1 OS=Mus musculus GN=Tln1 PE=1 SV=2	sp|P26039|TLN1_MOUSE	1323	S	ALS|79.97|TDPASPNLK	1	LAAKALS*TDPASP	2	14.49	2.6284	0.0442	0.2432	54.75	NO OTHERS:2	ALS|79.97|TDPASPNLK	2	0	0	0	ALSTDPASPNLK	ind_MOUSE.Tryp.TMT.REVUniprot20150423.CONTAM.fasta.hdr	21638	16834	17054	3	16836	21638	17054	16834	19590	3	16836	0.99	21637	15058	16835	19590	3	https://kronos.stanford.edu/cgi-bin/blast_html4?Db=/seq_db/static/ind_MOUSE.Tryp.TMT.REVUniprot20150423.CONTAM.fasta.hdr&Pep=ALSTDPASPNLK&MassType=0	https://kronos.stanford.edu/gfy/www/modules/show_out/show_out_wrapper.php?run_id=&search_id=&scans_id=&peptide_id=&scanf=&charge=	https://kronos.stanford.edu/gfy/www/modules/show_out/show_out_wrapper.php?run_id=16836&search_id=21638&scans_id=16834&peptide_id=17054&scanf=19590&charge=3	http://kronos.stanford.edu/gfy/www/modules/sdig/index.php?run_id=16836&search_id=21638&scans_id=16834&peptide_id=17054&scanf=19590	http:/kronos.stanford.edu/gfy/www/modules/ascore/visual/trim-phos.php?run_id=16836&search_id=21638&scans_id=16834&peptide_id=17054&charge=3	2.13183e+06	0.959044	0.0195314	0.548273	0.00924318	0.0212913	59.3165
Homeodomain-interacting protein kinase 4 OS=Mus musculus GN=Hipk4 PE=1 SV=2	sp|Q3V016|HIPK4_MOUSE	533	S	TTS|79.97|TEPSVIPQREGDGPGIK	1	GEGRTTS*TEPSVI	2	0	2.3699	0.0011	0.318	42.56	NO OTHERS:2	NONE > ascore = 13	2	0	0	1	TTSTEPSVIPQREGDGPGIK	ind_MOUSE.Tryp.TMT.REVUniprot20150423.CONTAM.fasta.hdr	21638	16834	13070	3	16836	21637	11382	16835	16261	3		0.99	21637	11382	16835	17178	3	https://kronos.stanford.edu/cgi-bin/blast_html4?Db=/seq_db/static/ind_MOUSE.Tryp.TMT.REVUniprot20150423.CONTAM.fasta.hdr&Pep=TTSTEPSVIPQREGDGPGIK&MassType=0	https://kronos.stanford.edu/gfy/www/modules/show_out/show_out_wrapper.php?run_id=&search_id=&scans_id=&peptide_id=&scanf=&charge=	https://kronos.stanford.edu/gfy/www/modules/show_out/show_out_wrapper.php?run_id=&search_id=21637&scans_id=16835&peptide_id=11382&scanf=16261&charge=3	http://kronos.stanford.edu/gfy/www/modules/sdig/index.php?run_id=&search_id=21637&scans_id=16835&peptide_id=11382&scanf=16261	http:/kronos.stanford.edu/gfy/www/modules/ascore/visual/trim-phos.php?run_id=16836&search_id=21638&scans_id=16834&peptide_id=13070&charge=3	9.75164e+06	0.911116	0.0181483	0.468349	0.00824552	0.100076	56.8004
Homeodomain-interacting protein kinase 4 OS=Mus musculus GN=Hipk4 PE=1 SV=2	sp|Q3V016|HIPK4_MOUSE	534	T	GSGWEEGEGRTTST|79.97|EPSVIPQR	1	EGRTTST*EPSVIP	3	0	2.9205	0.0038	0.3585	36.66	NO OTHERS:3	NONE > ascore = 13	3	0	0	1	GSGWEEGEGRTTSTEPSVIPQR	ind_MOUSE.Tryp.TMT.REVUniprot20150423.CONTAM.fasta.hdr	21639	16833	16769	3	16835	21639	16769	16833	18434	3	16835	0.99	21639	16769	16833	18434	3	https://kronos.stanford.edu/cgi-bin/blast_html4?Db=/seq_db/static/ind_MOUSE.Tryp.TMT.REVUniprot20150423.CONTAM.fasta.hdr&Pep=GSGWEEGEGRTTSTEPSVIPQR&MassType=0	https://kronos.stanford.edu/gfy/www/modules/show_out/show_out_wrapper.php?run_id=&search_id=&scans_id=&peptide_id=&scanf=&charge=	https://kronos.stanford.edu/gfy/www/modules/show_out/show_out_wrapper.php?run_id=16835&search_id=21639&scans_id=16833&peptide_id=16769&scanf=18434&charge=3	http://kronos.stanford.edu/gfy/www/modules/sdig/index.php?run_id=16835&search_id=21639&scans_id=16833&peptide_id=16769&scanf=18434	http:/kronos.stanford.edu/gfy/www/modules/ascore/visual/trim-phos.php?run_id=16835&search_id=21639&scans_id=16833&peptide_id=16769&charge=3	9.41907e+06	0.961292	0.0283207	0.503783	0.0115059	0.111532	43.7847
G-protein-signaling modulator 1 (Fragment) OS=Mus musculus GN=Gpsm1 PE=1 SV=1	tr|F6SX81|F6SX81_MOUSE	207	T	LT|79.97|SPAAAEKPDLAGYEAQGARPK	1	LALGRLT*SPAAAE	1	9.34	4.4521	0.0169	0.5075	67.86	NO OTHERS:1	NONE > ascore = 13	1	0	0	4	LTSPAAAEKPDLAGYEAQGARPK	ind_MOUSE.Tryp.TMT.REVUniprot20150423.CONTAM.fasta.hdr	21636	16836	11915	4	16838	21636	11915	16836	16781	4	16838	0.99	21636	11915	16836	16781	4	https://kronos.stanford.edu/cgi-bin/blast_html4?Db=/seq_db/static/ind_MOUSE.Tryp.TMT.REVUniprot20150423.CONTAM.fasta.hdr&Pep=LTSPAAAEKPDLAGYEAQGARPK&MassType=0	https://kronos.stanford.edu/gfy/www/modules/show_out/show_out_wrapper.php?run_id=&search_id=&scans_id=&peptide_id=&scanf=&charge=	https://kronos.stanford.edu/gfy/www/modules/show_out/show_out_wrapper.php?run_id=16838&search_id=21636&scans_id=16836&peptide_id=11915&scanf=16781&charge=4	http://kronos.stanford.edu/gfy/www/modules/sdig/index.php?run_id=16838&search_id=21636&scans_id=16836&peptide_id=11915&scanf=16781	http:/kronos.stanford.edu/gfy/www/modules/ascore/visual/trim-phos.php?run_id=16838&search_id=21636&scans_id=16836&peptide_id=11915&charge=4	3.41301e+06	0.977686	0.0397734	0.537356	0.0160536	0.0416601	33.4725
E3 SUMO-protein ligase RanBP2 OS=Mus musculus GN=Ranbp2 PE=1 SV=2	sp|Q9ERU9|RBP2_MOUSE	1792	S	STS|79.97|REGFQFGK	1	DLAKSTS*REGFQF	1	0	1.8781	0.0165	0.2254	43.12	NO OTHERS:1	NONE > ascore = 13	1	0	0	0	STSREGFQFGK	ind_MOUSE.Tryp.TMT.REVUniprot20150423.CONTAM.fasta.hdr	21634	16839	3924	2	16841	21634	3924	16839	11989	2	16841	0.99	21634	3924	16839	11989	2	https://kronos.stanford.edu/cgi-bin/blast_html4?Db=/seq_db/static/ind_MOUSE.Tryp.TMT.REVUniprot20150423.CONTAM.fasta.hdr&Pep=STSREGFQFGK&MassType=0	https://kronos.stanford.edu/gfy/www/modules/show_out/show_out_wrapper.php?run_id=&search_id=&scans_id=&peptide_id=&scanf=&charge=	https://kronos.stanford.edu/gfy/www/modules/show_out/show_out_wrapper.php?run_id=16841&search_id=21634&scans_id=16839&peptide_id=3924&scanf=11989&charge=2	http://kronos.stanford.edu/gfy/www/modules/sdig/index.php?run_id=16841&search_id=21634&scans_id=16839&peptide_id=3924&scanf=11989	http:/kronos.stanford.edu/gfy/www/modules/ascore/visual/trim-phos.php?run_id=16841&search_id=21634&scans_id=16839&peptide_id=3924&charge=2	2.34941e+06	0.989617	0.0551875	0.643782	0.021906	0.0400562	29.3884
Prefoldin subunit 2 OS=Mus musculus GN=Pfdn2 PE=2 SV=2	sp|O70591|PFD2_MOUSE	148	S	ASS|79.97|AGVLVS	1	AGAKASS*AGVLVS	1	11.51	2.03	0.1222	0.4883	34.24	NO OTHERS:1	NONE > ascore = 13	1	0	0	0	ASSAGVLVS	ind_MOUSE.Tryp.TMT.REVUniprot20150423.CONTAM.fasta.hdr	21639	16833	24318	2	16835	21639	24318	16833	22525	2	16835	0.99	21639	24318	16833	22525	2	https://kronos.stanford.edu/cgi-bin/blast_html4?Db=/seq_db/static/ind_MOUSE.Tryp.TMT.REVUniprot20150423.CONTAM.fasta.hdr&Pep=ASSAGVLVS&MassType=0	https://kronos.stanford.edu/gfy/www/modules/show_out/show_out_wrapper.php?run_id=&search_id=&scans_id=&peptide_id=&scanf=&charge=	https://kronos.stanford.edu/gfy/www/modules/show_out/show_out_wrapper.php?run_id=16835&search_id=21639&scans_id=16833&peptide_id=24318&scanf=22525&charge=2	http://kronos.stanford.edu/gfy/www/modules/sdig/index.php?run_id=16835&search_id=21639&scans_id=16833&peptide_id=24318&scanf=22525	http:/kronos.stanford.edu/gfy/www/modules/ascore/visual/trim-phos.php?run_id=16835&search_id=21639&scans_id=16833&peptide_id=24318&charge=2	113409	0.965738	0.0409405	0.73144	0.0255742	0.0654109	28.6007
Myotubularin-related protein 14 (Fragment) OS=Mus musculus GN=Mtmr14 PE=4 SV=1	tr|F6W741|F6W741_MOUSE	236	T	AAT|79.97|PS|79.97|PSGAIGGLLEQFAR	1	VGLRAAT*PSPSGA	2	33.47	2.8311	0.1068	0.4859	78.22	9 days, 22:02:00	AAT|79.97|PS|79.97|PSGAIGGLLEQFAR	0	2	0	1	AATPSPSGAIGGLLEQFAR	ind_MOUSE.Tryp.TMT.REVUniprot20150423.CONTAM.fasta.hdr	21636	16836	69041	2		21636	69041	16836	47829	2		0.99	21636	69041	16836	49472	2	https://kronos.stanford.edu/cgi-bin/blast_html4?Db=/seq_db/static/ind_MOUSE.Tryp.TMT.REVUniprot20150423.CONTAM.fasta.hdr&Pep=AATPSPSGAIGGLLEQFAR&MassType=0	https://kronos.stanford.edu/gfy/www/modules/show_out/show_out_wrapper.php?run_id=&search_id=&scans_id=&peptide_id=&scanf=&charge=	https://kronos.stanford.edu/gfy/www/modules/show_out/show_out_wrapper.php?run_id=&search_id=21636&scans_id=16836&peptide_id=69041&scanf=47829&charge=2	http://kronos.stanford.edu/gfy/www/modules/sdig/index.php?run_id=&search_id=21636&scans_id=16836&peptide_id=69041&scanf=47829	http:/kronos.stanford.edu/gfy/www/modules/ascore/visual/trim-phos.php?run_id=&search_id=21636&scans_id=16836&peptide_id=69041&charge=2	299049	0.983226	0.0292427	0.700793	0.024591	0.0531327	28.498
Myotubularin-related protein 14 (Fragment) OS=Mus musculus GN=Mtmr14 PE=4 SV=1	tr|F6W741|F6W741_MOUSE	238	S	AAT|79.97|PS|79.97|PSGAIGGLLEQFAR	2	LRAATPS*PSGAIG	2		2.8311	0.1068	0.4859	78.22	9 days, 20:02:00	NONE > ascore = 13	0	2	0	1	AATPSPSGAIGGLLEQFAR	ind_MOUSE.Tryp.TMT.REVUniprot20150423.CONTAM.fasta.hdr	21637	16835	72873	2	16837	21636	69041	16836	47829	2		0.99	21636	69041	16836	49472	2	https://kronos.stanford.edu/cgi-bin/blast_html4?Db=/seq_db/static/ind_MOUSE.Tryp.TMT.REVUniprot20150423.CONTAM.fasta.hdr&Pep=AATPSPSGAIGGLLEQFAR&MassType=0	https://kronos.stanford.edu/gfy/www/modules/show_out/show_out_wrapper.php?run_id=&search_id=&scans_id=&peptide_id=&scanf=&charge=	https://kronos.stanford.edu/gfy/www/modules/show_out/show_out_wrapper.php?run_id=&search_id=21636&scans_id=16836&peptide_id=69041&scanf=47829&charge=2	http://kronos.stanford.edu/gfy/www/modules/sdig/index.php?run_id=&search_id=21636&scans_id=16836&peptide_id=69041&scanf=47829	http:/kronos.stanford.edu/gfy/www/modules/ascore/visual/trim-phos.php?run_id=16837&search_id=21637&scans_id=16835&peptide_id=72873&charge=2	299049	0.983226	0.0292427	0.700793	0.024591	0.0531327	28.498
Heterogeneous nuclear ribonucleoprotein F (Fragment) OS=Mus musculus GN=Hnrnpf PE=1 SV=4	tr|J3QM80|J3QM80_MOUSE	195	S	SYS|79.97|DPPLK	1	EEVRSYS*DPPLKF	1	16.22	1.8079	0.0999	0.2979	56.46	NO OTHERS:1	SYS|79.97|DPPLK	1	0	0	3	SYSDPPLK	ind_MOUSE.Tryp.TMT.REVUniprot20150423.CONTAM.fasta.hdr	21637	16835	10499	2	16837	21637	10499	16835	15726	2	16837	0.99	21637	10499	16835	15726	2	https://kronos.stanford.edu/cgi-bin/blast_html4?Db=/seq_db/static/ind_MOUSE.Tryp.TMT.REVUniprot20150423.CONTAM.fasta.hdr&Pep=SYSDPPLK&MassType=0	https://kronos.stanford.edu/gfy/www/modules/show_out/show_out_wrapper.php?run_id=&search_id=&scans_id=&peptide_id=&scanf=&charge=	https://kronos.stanford.edu/gfy/www/modules/show_out/show_out_wrapper.php?run_id=16837&search_id=21637&scans_id=16835&peptide_id=10499&scanf=15726&charge=2	http://kronos.stanford.edu/gfy/www/modules/sdig/index.php?run_id=16837&search_id=21637&scans_id=16835&peptide_id=10499&scanf=15726	http:/kronos.stanford.edu/gfy/www/modules/ascore/visual/trim-phos.php?run_id=16837&search_id=21637&scans_id=16835&peptide_id=10499&charge=2	5.35368e+06	0.994564	0.0351016	0.580317	0.02042	0.0437244	28.4191
SEC23-interacting protein OS=Mus musculus GN=Sec23ip PE=4 SV=1	tr|G3X928|G3X928_MOUSE	603	S	SPGS|79.97|VAVSNGVIK	1	VSKSPGS*VAVSNG	1	16.47	3.2625	0.0791	0.4626	80.45	NO OTHERS:1	SPGS|79.97|VAVSNGVIK	1	0	0	1	SPGSVAVSNGVIK	ind_MOUSE.Tryp.TMT.REVUniprot20150423.CONTAM.fasta.hdr	21638	16834	20780	3	16836	21638	20780	16834	21699	3	16836	0.99	21638	20780	16834	21699	3	https://kronos.stanford.edu/cgi-bin/blast_html4?Db=/seq_db/static/ind_MOUSE.Tryp.TMT.REVUniprot20150423.CONTAM.fasta.hdr&Pep=SPGSVAVSNGVIK&MassType=0	https://kronos.stanford.edu/gfy/www/modules/show_out/show_out_wrapper.php?run_id=&search_id=&scans_id=&peptide_id=&scanf=&charge=	https://kronos.stanford.edu/gfy/www/modules/show_out/show_out_wrapper.php?run_id=16836&search_id=21638&scans_id=16834&peptide_id=20780&scanf=21699&charge=3	http://kronos.stanford.edu/gfy/www/modules/sdig/index.php?run_id=16836&search_id=21638&scans_id=16834&peptide_id=20780&scanf=21699	http:/kronos.stanford.edu/gfy/www/modules/ascore/visual/trim-phos.php?run_id=16836&search_id=21638&scans_id=16834&peptide_id=20780&charge=3	541195	0.993964	0.0363368	0.658288	0.0231745	0.047775	28.4056
60S acidic ribosomal protein P2 OS=Mus musculus GN=Rplp2 PE=1 SV=3	sp|P99027|RLA2_MOUSE	79	S	LASVPAGGAVAVSAAPGS|79.97|AAPAAGSAPAAAEEK	1	VSAAPGS*AAPAAG	7	32.25	7.2652	0.0291	0.702	162.57	NO OTHERS:5; 86:2	LASVPAGGAVAVSAAPGS|79.97|AAPAAGSAPAAAEEK, LASVPAGGAVAVSAAPGS|79.97|AAPAAGSAPAAAEEKK, LASVPAGGAVAVSAAPGS|79.97|AAPAAGS|79.97|APAAAEEK	5	2	0	0	LASVPAGGAVAVSAAPGSAAPAAGSAPAAAEEK	ind_MOUSE.Tryp.TMT.REVUniprot20150423.CONTAM.fasta.hdr	21637	16835	27573	3	16837	21634	16076	16839	18913	3	16841	0.99	21634	16076	16839	18913	3	https://kronos.stanford.edu/cgi-bin/blast_html4?Db=/seq_db/static/ind_MOUSE.Tryp.TMT.REVUniprot20150423.CONTAM.fasta.hdr&Pep=LASVPAGGAVAVSAAPGSAAPAAGSAPAAAEEK&MassType=0	https://kronos.stanford.edu/gfy/www/modules/show_out/show_out_wrapper.php?run_id=&search_id=&scans_id=&peptide_id=&scanf=&charge=	https://kronos.stanford.edu/gfy/www/modules/show_out/show_out_wrapper.php?run_id=16841&search_id=21634&scans_id=16839&peptide_id=16076&scanf=18913&charge=3	http://kronos.stanford.edu/gfy/www/modules/sdig/index.php?run_id=16841&search_id=21634&scans_id=16839&peptide_id=16076&scanf=18913	http:/kronos.stanford.edu/gfy/www/modules/ascore/visual/trim-phos.php?run_id=16837&search_id=21637&scans_id=16835&peptide_id=27573&charge=3	4.03402e+06	0.994956	0.0424855	0.563388	0.0209645	0.0410929	26.8735
E3 ubiquitin-protein ligase NEDD4-like OS=Mus musculus GN=Nedd4l PE=1 SV=1	tr|E9PXB7|E9PXB7_MOUSE	449	S	SLS|79.97|S|79.97|PTVTLSAPLEGAK	1	RRPRSLS*SPTVTL	1	0	2.6729	0.0076	0.3053	69	18 days, 18:01:00	NONE > ascore = 13	0	1	0	4	SLSSPTVTLSAPLEGAK	ind_MOUSE.Tryp.TMT.REVUniprot20150423.CONTAM.fasta.hdr	21637	16835	44079	2	16837	21637	44079	16835	34132	2	16837	0.99	21637	44079	16835	34132	2	https://kronos.stanford.edu/cgi-bin/blast_html4?Db=/seq_db/static/ind_MOUSE.Tryp.TMT.REVUniprot20150423.CONTAM.fasta.hdr&Pep=SLSSPTVTLSAPLEGAK&MassType=0	https://kronos.stanford.edu/gfy/www/modules/show_out/show_out_wrapper.php?run_id=&search_id=&scans_id=&peptide_id=&scanf=&charge=	https://kronos.stanford.edu/gfy/www/modules/show_out/show_out_wrapper.php?run_id=16837&search_id=21637&scans_id=16835&peptide_id=44079&scanf=34132&charge=2	http://kronos.stanford.edu/gfy/www/modules/sdig/index.php?run_id=16837&search_id=21637&scans_id=16835&peptide_id=44079&scanf=34132	http:/kronos.stanford.edu/gfy/www/modules/ascore/visual/trim-phos.php?run_id=16837&search_id=21637&scans_id=16835&peptide_id=44079&charge=2	719698	0.996172	0.0282177	0.646275	0.024871	0.0517022	25.9851
Dapper homolog 3 OS=Mus musculus GN=Dact3 PE=1 SV=1	sp|Q0PHV7|DACT3_MOUSE	215	T	AGPFLT|79.97|PS|79.97|PLHAVALR	1	RAGPFLT*PSPLHA	3	1000	2.983	0.2777	0.2777	51.93	9 days, 1:03:00	AGPFLT|79.97|PS|79.97|PLHAVALR	0	3	0	0	AGPFLTPSPLHAVALR	ind_MOUSE.Tryp.TMT.REVUniprot20150423.CONTAM.fasta.hdr	21637	16835	45266	3	16837	21637	45266	16835	34770	3	16837	0.99	21637	45266	16835	34770	3	https://kronos.stanford.edu/cgi-bin/blast_html4?Db=/seq_db/static/ind_MOUSE.Tryp.TMT.REVUniprot20150423.CONTAM.fasta.hdr&Pep=AGPFLTPSPLHAVALR&MassType=0	https://kronos.stanford.edu/gfy/www/modules/show_out/show_out_wrapper.php?run_id=&search_id=&scans_id=&peptide_id=&scanf=&charge=	https://kronos.stanford.edu/gfy/www/modules/show_out/show_out_wrapper.php?run_id=16837&search_id=21637&scans_id=16835&peptide_id=45266&scanf=34770&charge=3	http://kronos.stanford.edu/gfy/www/modules/sdig/index.php?run_id=16837&search_id=21637&scans_id=16835&peptide_id=45266&scanf=34770	http:/kronos.stanford.edu/gfy/www/modules/ascore/visual/trim-phos.php?run_id=16837&search_id=21637&scans_id=16835&peptide_id=45266&charge=3	121390	0.939288	0.041346	0.706851	0.0272912	0.0848252	25.9004
Dapper homolog 3 OS=Mus musculus GN=Dact3 PE=1 SV=1	sp|Q0PHV7|DACT3_MOUSE	217	S	AGPFLT|79.97|PS|79.97|PLHAVALR	2	GPFLTPS*PLHAVA	3	1000	2.983	0.2777	0.2777	51.93	8 days, 23:03:00	AGPFLT|79.97|PS|79.97|PLHAVALR	0	3	0	0	AGPFLTPSPLHAVALR	ind_MOUSE.Tryp.TMT.REVUniprot20150423.CONTAM.fasta.hdr	21637	16835	45266	3	16837	21637	45266	16835	34770	3	16837	0.99	21637	45266	16835	34770	3	https://kronos.stanford.edu/cgi-bin/blast_html4?Db=/seq_db/static/ind_MOUSE.Tryp.TMT.REVUniprot20150423.CONTAM.fasta.hdr&Pep=AGPFLTPSPLHAVALR&MassType=0	https://kronos.stanford.edu/gfy/www/modules/show_out/show_out_wrapper.php?run_id=&search_id=&scans_id=&peptide_id=&scanf=&charge=	https://kronos.stanford.edu/gfy/www/modules/show_out/show_out_wrapper.php?run_id=16837&search_id=21637&scans_id=16835&peptide_id=45266&scanf=34770&charge=3	http://kronos.stanford.edu/gfy/www/modules/sdig/index.php?run_id=16837&search_id=21637&scans_id=16835&peptide_id=45266&scanf=34770	http:/kronos.stanford.edu/gfy/www/modules/ascore/visual/trim-phos.php?run_id=16837&search_id=21637&scans_id=16835&peptide_id=45266&charge=3	121390	0.939288	0.041346	0.706851	0.0272912	0.0848252	25.9004
RNA binding motif protein, X-linked-like-1 OS=Mus musculus GN=Rbmxl1 PE=1 SV=1	sp|Q91VM5|RMXL1_MOUSE	102	S	RGPPPPPRS|79.97|R	1	PPPPPRS*RGPPRG	2	1000	2.851	0.333	0.333	21.03	NO OTHERS:2	RGPPPPPRS|79.97|R	2	0	0	0	RGPPPPPRSR	ind_MOUSE.Tryp.TMT.REVUniprot20150423.CONTAM.fasta.hdr	21636	16836	17125	3	16838	21636	17125	16836	1983	3	16838	0.99	21636	17125	16836	1983	3	https://kronos.stanford.edu/cgi-bin/blast_html4?Db=/seq_db/static/ind_MOUSE.Tryp.TMT.REVUniprot20150423.CONTAM.fasta.hdr&Pep=RGPPPPPRSR&MassType=0	https://kronos.stanford.edu/gfy/www/modules/show_out/show_out_wrapper.php?run_id=&search_id=&scans_id=&peptide_id=&scanf=&charge=	https://kronos.stanford.edu/gfy/www/modules/show_out/show_out_wrapper.php?run_id=16838&search_id=21636&scans_id=16836&peptide_id=17125&scanf=1983&charge=3	http://kronos.stanford.edu/gfy/www/modules/sdig/index.php?run_id=16838&search_id=21636&scans_id=16836&peptide_id=17125&scanf=1983	http:/kronos.stanford.edu/gfy/www/modules/ascore/visual/trim-phos.php?run_id=16838&search_id=21636&scans_id=16836&peptide_id=17125&charge=3	674181	0.99439	0.0313699	0.655804	0.0264787	0.0492924	24.7672
General transcription factor II-I OS=Mus musculus GN=Gtf2i PE=1 SV=1	tr|G3UYD0|G3UYD0_MOUSE	242	T	LKST|79.97|EPPPPPPVPEPANAGK	1	TKRLKST*EPPPPP	1	18.87	4.9766	0.0128	0.4711	133.47	NO OTHERS:1	LKST|79.97|EPPPPPPVPEPANAGK	1	0	0	8	LKSTEPPPPPPVPEPANAGK	ind_MOUSE.Tryp.TMT.REVUniprot20150423.CONTAM.fasta.hdr	21634	16839	11925	3	16841	21634	11925	16839	16592	3	16841	0.99	21634	11925	16839	16592	3	https://kronos.stanford.edu/cgi-bin/blast_html4?Db=/seq_db/static/ind_MOUSE.Tryp.TMT.REVUniprot20150423.CONTAM.fasta.hdr&Pep=LKSTEPPPPPPVPEPANAGK&MassType=0	https://kronos.stanford.edu/gfy/www/modules/show_out/show_out_wrapper.php?run_id=&search_id=&scans_id=&peptide_id=&scanf=&charge=	https://kronos.stanford.edu/gfy/www/modules/show_out/show_out_wrapper.php?run_id=16841&search_id=21634&scans_id=16839&peptide_id=11925&scanf=16592&charge=3	http://kronos.stanford.edu/gfy/www/modules/sdig/index.php?run_id=16841&search_id=21634&scans_id=16839&peptide_id=11925&scanf=16592	http:/kronos.stanford.edu/gfy/www/modules/ascore/visual/trim-phos.php?run_id=16841&search_id=21634&scans_id=16839&peptide_id=11925&charge=3	1.43732e+06	0.989612	0.0663038	0.615024	0.0251431	0.0483847	24.461
Twinfilin-1 OS=Mus musculus GN=Twf1 PE=1 SV=2	sp|Q91YR1|TWF1_MOUSE	142	S	YLLSQS|79.97|SPAPLTAAEEELR	1	KYLLSQS*SPAPLT	1	13.24	3.1798	0.0334	0.4835	67.72	NO OTHERS:1	YLLSQS|79.97|SPAPLTAAEEELR	1	0	0	0	YLLSQSSPAPLTAAEEELR	ind_MOUSE.Tryp.TMT.REVUniprot20150423.CONTAM.fasta.hdr	21638	16834	54158	2	16836	21638	54158	16834	39532	2	16836	0.99	21638	54158	16834	39532	2	https://kronos.stanford.edu/cgi-bin/blast_html4?Db=/seq_db/static/ind_MOUSE.Tryp.TMT.REVUniprot20150423.CONTAM.fasta.hdr&Pep=YLLSQSSPAPLTAAEEELR&MassType=0	https://kronos.stanford.edu/gfy/www/modules/show_out/show_out_wrapper.php?run_id=&search_id=&scans_id=&peptide_id=&scanf=&charge=	https://kronos.stanford.edu/gfy/www/modules/show_out/show_out_wrapper.php?run_id=16836&search_id=21638&scans_id=16834&peptide_id=54158&scanf=39532&charge=2	http://kronos.stanford.edu/gfy/www/modules/sdig/index.php?run_id=16836&search_id=21638&scans_id=16834&peptide_id=54158&scanf=39532	http:/kronos.stanford.edu/gfy/www/modules/ascore/visual/trim-phos.php?run_id=16836&search_id=21638&scans_id=16834&peptide_id=54158&charge=2	1.22318e+06	0.974158	0.0339959	0.516829	0.0214946	0.126848	24.0447
Nucleosome assembly protein 1-like 4 OS=Mus musculus GN=Nap1l4 PE=1 SV=1	sp|Q78ZA7|NP1L4_MOUSE	51	T	LDNVSHT|79.97|PSSYIETLPK	1	LDNVSHT*PSSYIE	1	2.22	2.9722	0.0347	0.2211	36.79	NO OTHERS:1	NONE > ascore = 13	1	0	0	0	LDNVSHTPSSYIETLPK	ind_MOUSE.Tryp.TMT.REVUniprot20150423.CONTAM.fasta.hdr	21637	16835	28861	3	16837	21637	28861	16835	25914	3	16837	0.99	21637	28861	16835	25914	3	https://kronos.stanford.edu/cgi-bin/blast_html4?Db=/seq_db/static/ind_MOUSE.Tryp.TMT.REVUniprot20150423.CONTAM.fasta.hdr&Pep=LDNVSHTPSSYIETLPK&MassType=0	https://kronos.stanford.edu/gfy/www/modules/show_out/show_out_wrapper.php?run_id=&search_id=&scans_id=&peptide_id=&scanf=&charge=	https://kronos.stanford.edu/gfy/www/modules/show_out/show_out_wrapper.php?run_id=16837&search_id=21637&scans_id=16835&peptide_id=28861&scanf=25914&charge=3	http://kronos.stanford.edu/gfy/www/modules/sdig/index.php?run_id=16837&search_id=21637&scans_id=16835&peptide_id=28861&scanf=25914	http:/kronos.stanford.edu/gfy/www/modules/ascore/visual/trim-phos.php?run_id=16837&search_id=21637&scans_id=16835&peptide_id=28861&charge=3	1.08414e+06	0.98466	0.0447872	0.506615	0.0217852	0.0896616	23.255
Protein arginine N-methyltransferase 3 (Fragment) OS=Mus musculus GN=Prmt3 PE=4 SV=1	tr|F6Y6T5|F6Y6T5_MOUSE	129	S	ALS|79.97|AEAALAR	1	MEARALS*AEAALA	1	1000	1.7629	0.2608	0.2608	52.73	NO OTHERS:1	ALS|79.97|AEAALAR	1	0	0	2	ALSAEAALAR	ind_MOUSE.Tryp.TMT.REVUniprot20150423.CONTAM.fasta.hdr	21638	16834	16182	2	16836	21638	16182	16834	19072	2	16836	0.99	21638	16182	16834	19072	2	https://kronos.stanford.edu/cgi-bin/blast_html4?Db=/seq_db/static/ind_MOUSE.Tryp.TMT.REVUniprot20150423.CONTAM.fasta.hdr&Pep=ALSAEAALAR&MassType=0	https://kronos.stanford.edu/gfy/www/modules/show_out/show_out_wrapper.php?run_id=&search_id=&scans_id=&peptide_id=&scanf=&charge=	https://kronos.stanford.edu/gfy/www/modules/show_out/show_out_wrapper.php?run_id=16836&search_id=21638&scans_id=16834&peptide_id=16182&scanf=19072&charge=2	http://kronos.stanford.edu/gfy/www/modules/sdig/index.php?run_id=16836&search_id=21638&scans_id=16834&peptide_id=16182&scanf=19072	http:/kronos.stanford.edu/gfy/www/modules/ascore/visual/trim-phos.php?run_id=16836&search_id=21638&scans_id=16834&peptide_id=16182&charge=2	3.1508e+06	0.940026	0.0159862	0.518987	0.0226039	0.0252755	22.9601
MKIAA0248 protein (Fragment) OS=Mus musculus GN=Gbf1 PE=1 SV=1	tr|Q6A099|Q6A099_MOUSE	855	S	GAS|79.97|PEGVFLR	1	LLHRGAS*PEGVFL	1	1000	2.2223	0.3662	0.3662	35.99	NO OTHERS:1	GAS|79.97|PEGVFLR	1	0	0	1	GASPEGVFLR	ind_MOUSE.Tryp.TMT.REVUniprot20150423.CONTAM.fasta.hdr	21638	16834	24204	2	16836	21638	24204	16834	23530	2	16836	0.99	21638	24204	16834	23530	2	https://kronos.stanford.edu/cgi-bin/blast_html4?Db=/seq_db/static/ind_MOUSE.Tryp.TMT.REVUniprot20150423.CONTAM.fasta.hdr&Pep=GASPEGVFLR&MassType=0	https://kronos.stanford.edu/gfy/www/modules/show_out/show_out_wrapper.php?run_id=&search_id=&scans_id=&peptide_id=&scanf=&charge=	https://kronos.stanford.edu/gfy/www/modules/show_out/show_out_wrapper.php?run_id=16836&search_id=21638&scans_id=16834&peptide_id=24204&scanf=23530&charge=2	http://kronos.stanford.edu/gfy/www/modules/sdig/index.php?run_id=16836&search_id=21638&scans_id=16834&peptide_id=24204&scanf=23530	http:/kronos.stanford.edu/gfy/www/modules/ascore/visual/trim-phos.php?run_id=16836&search_id=21638&scans_id=16834&peptide_id=24204&charge=2	1.78623e+06	0.881224	0.0182082	0.463686	0.0203598	0.0249844	22.7746
Protein VAC14 homolog OS=Mus musculus GN=Vac14 PE=1 SV=1	sp|Q80WQ2|VAC14_MOUSE	510	S	ANLLNPPS|79.97|TK	1	NLLNPPS*TKGLEG	4	28.87	2.3116	0.0643	0.3505	48.61	NO OTHERS:4	ANLLNPPS|79.97|TK	4	0	0	0	ANLLNPPSTK	ind_MOUSE.Tryp.TMT.REVUniprot20150423.CONTAM.fasta.hdr	21635	16837	7801	2	16839	21634	13369	16839	17483	2		0.99	21634	13369	16839	14623	2	https://kronos.stanford.edu/cgi-bin/blast_html4?Db=/seq_db/static/ind_MOUSE.Tryp.TMT.REVUniprot20150423.CONTAM.fasta.hdr&Pep=ANLLNPPSTK&MassType=0	https://kronos.stanford.edu/gfy/www/modules/show_out/show_out_wrapper.php?run_id=&search_id=&scans_id=&peptide_id=&scanf=&charge=	https://kronos.stanford.edu/gfy/www/modules/show_out/show_out_wrapper.php?run_id=&search_id=21634&scans_id=16839&peptide_id=13369&scanf=17483&charge=2	http://kronos.stanford.edu/gfy/www/modules/sdig/index.php?run_id=&search_id=21634&scans_id=16839&peptide_id=13369&scanf=17483	http:/kronos.stanford.edu/gfy/www/modules/ascore/visual/trim-phos.php?run_id=16839&search_id=21635&scans_id=16837&peptide_id=7801&charge=2	4.17402e+06	0.992997	0.0436325	0.629305	0.0279469	0.0566924	22.5179
Filamin-B OS=Mus musculus GN=Flnb PE=1 SV=3	sp|Q80X90|FLNB_MOUSE	2478	S	LVS|79.97|PGSANETSSILVESVTR	1	TGQRLVS*PGSANE	12	38.75	3.84	0.1107	0.5116	80.68	NO OTHERS:12	LVS|79.97|PGSANETSSILVESVTR	12	0	0	0	LVSPGSANETSSILVESVTR	ind_MOUSE.Tryp.TMT.REVUniprot20150423.CONTAM.fasta.hdr	21637	16835	42583	2		21636	42470	16836	33818	2		0.99	21637	42583	16835	34867	2	https://kronos.stanford.edu/cgi-bin/blast_html4?Db=/seq_db/static/ind_MOUSE.Tryp.TMT.REVUniprot20150423.CONTAM.fasta.hdr&Pep=LVSPGSANETSSILVESVTR&MassType=0	https://kronos.stanford.edu/gfy/www/modules/show_out/show_out_wrapper.php?run_id=&search_id=&scans_id=&peptide_id=&scanf=&charge=	https://kronos.stanford.edu/gfy/www/modules/show_out/show_out_wrapper.php?run_id=&search_id=21636&scans_id=16836&peptide_id=42470&scanf=33818&charge=2	http://kronos.stanford.edu/gfy/www/modules/sdig/index.php?run_id=&search_id=21636&scans_id=16836&peptide_id=42470&scanf=33818	http:/kronos.stanford.edu/gfy/www/modules/ascore/visual/trim-phos.php?run_id=&search_id=21637&scans_id=16835&peptide_id=42583&charge=2	1.185e+07	0.872295	0.024715	0.417672	0.018926	0.0999036	22.0687
Zinc finger RNA-binding protein (Fragment) OS=Mus musculus GN=Zfr PE=4 SV=1	tr|F6V459|F6V459_MOUSE	55	S	RPDS|79.97|SDDRYVMTK	1	PLRRPDS*SDDRYV	2	13.38	3.1131	0.0105	0.2532	63.66	NO OTHERS:2	RPDS|79.97|SDDRYVMTK	2	0	0	1	RPDSSDDRYVMTK	ind_MOUSE.Tryp.TMT.REVUniprot20150423.CONTAM.fasta.hdr	21638	16834	83399	4	16836	21637	81534	16835	8440	3		0.99	21637	81534	16835	8447	3	https://kronos.stanford.edu/cgi-bin/blast_html4?Db=/seq_db/static/ind_MOUSE.Tryp.TMT.REVUniprot20150423.CONTAM.fasta.hdr&Pep=RPDSSDDRYVMTK&MassType=0	https://kronos.stanford.edu/gfy/www/modules/show_out/show_out_wrapper.php?run_id=&search_id=&scans_id=&peptide_id=&scanf=&charge=	https://kronos.stanford.edu/gfy/www/modules/show_out/show_out_wrapper.php?run_id=&search_id=21637&scans_id=16835&peptide_id=81534&scanf=8440&charge=3	http://kronos.stanford.edu/gfy/www/modules/sdig/index.php?run_id=&search_id=21637&scans_id=16835&peptide_id=81534&scanf=8440	http:/kronos.stanford.edu/gfy/www/modules/ascore/visual/trim-phos.php?run_id=16836&search_id=21638&scans_id=16834&peptide_id=83399&charge=4	4.02922e+06	0.939446	0.0314332	0.492589	0.023339	0.0377782	21.1058
E3 ubiquitin-protein ligase HUWE1 OS=Mus musculus GN=Huwe1 PE=1 SV=1	tr|A2AFQ0|A2AFQ0_MOUSE	2996	T	EVLQNQLGIRPPT|79.97|R	1	LGIRPPT*RSAPSS	1	1000	3.0203	0.2959	0.2959	44.15	NO OTHERS:1	EVLQNQLGIRPPT|79.97|R	1	0	0	4	EVLQNQLGIRPPTR	ind_MOUSE.Tryp.TMT.REVUniprot20150423.CONTAM.fasta.hdr	21634	16839	10456	3	16841	21634	10456	16839	15735	3	16841	0.99	21634	10456	16839	15735	3	https://kronos.stanford.edu/cgi-bin/blast_html4?Db=/seq_db/static/ind_MOUSE.Tryp.TMT.REVUniprot20150423.CONTAM.fasta.hdr&Pep=EVLQNQLGIRPPTR&MassType=0	https://kronos.stanford.edu/gfy/www/modules/show_out/show_out_wrapper.php?run_id=&search_id=&scans_id=&peptide_id=&scanf=&charge=	https://kronos.stanford.edu/gfy/www/modules/show_out/show_out_wrapper.php?run_id=16841&search_id=21634&scans_id=16839&peptide_id=10456&scanf=15735&charge=3	http://kronos.stanford.edu/gfy/www/modules/sdig/index.php?run_id=16841&search_id=21634&scans_id=16839&peptide_id=10456&scanf=15735	http:/kronos.stanford.edu/gfy/www/modules/ascore/visual/trim-phos.php?run_id=16841&search_id=21634&scans_id=16839&peptide_id=10456&charge=3	1.23782e+06	0.99557	0.0337877	0.57629	0.0274953	0.0375706	20.9596
WD repeat-containing protein 91 OS=Mus musculus GN=Wdr91 PE=1 SV=1	sp|Q7TMQ7|WDR91_MOUSE	278	S	KSPSRLS|79.97|PAQGPPQAQSSAK	1	KSPSRLS*PAQGPP	1	7.78	2.1121	0.2222	0.3328	53.11	NO OTHERS:1	NONE > ascore = 13	1	0	0	1	KSPSRLSPAQGPPQAQSSAK	ind_MOUSE.Tryp.TMT.REVUniprot20150423.CONTAM.fasta.hdr	21634	16839	70803	3	16841	21634	70803	16839	5499	3	16841	0.99	21634	70803	16839	5499	3	https://kronos.stanford.edu/cgi-bin/blast_html4?Db=/seq_db/static/ind_MOUSE.Tryp.TMT.REVUniprot20150423.CONTAM.fasta.hdr&Pep=KSPSRLSPAQGPPQAQSSAK&MassType=0	https://kronos.stanford.edu/gfy/www/modules/show_out/show_out_wrapper.php?run_id=&search_id=&scans_id=&peptide_id=&scanf=&charge=	https://kronos.stanford.edu/gfy/www/modules/show_out/show_out_wrapper.php?run_id=16841&search_id=21634&scans_id=16839&peptide_id=70803&scanf=5499&charge=3	http://kronos.stanford.edu/gfy/www/modules/sdig/index.php?run_id=16841&search_id=21634&scans_id=16839&peptide_id=70803&scanf=5499	http:/kronos.stanford.edu/gfy/www/modules/ascore/visual/trim-phos.php?run_id=16841&search_id=21634&scans_id=16839&peptide_id=70803&charge=3	348948	0.980617	0.0821898	0.603421	0.0288551	0.0598343	20.9121
Cytospin-B OS=Mus musculus GN=Specc1 PE=1 SV=2	sp|Q5SXY1|CYTSB_MOUSE	935	S	LLSAS|79.97|TGGLKPSK	1	TRLLSAS*TGGLKP	2	16.22	2.2616	0.0124	0.2165	51.39	NO OTHERS:2	LLSAS|79.97|TGGLKPSK	2	0	0	1	LLSASTGGLKPSK	ind_MOUSE.Tryp.TMT.REVUniprot20150423.CONTAM.fasta.hdr	21634	16839	14055	2		21634	14055	16839	17896	2		0.99	21634	14055	16839	16630	2	https://kronos.stanford.edu/cgi-bin/blast_html4?Db=/seq_db/static/ind_MOUSE.Tryp.TMT.REVUniprot20150423.CONTAM.fasta.hdr&Pep=LLSASTGGLKPSK&MassType=0	https://kronos.stanford.edu/gfy/www/modules/show_out/show_out_wrapper.php?run_id=&search_id=&scans_id=&peptide_id=&scanf=&charge=	https://kronos.stanford.edu/gfy/www/modules/show_out/show_out_wrapper.php?run_id=&search_id=21634&scans_id=16839&peptide_id=14055&scanf=17896&charge=2	http://kronos.stanford.edu/gfy/www/modules/sdig/index.php?run_id=&search_id=21634&scans_id=16839&peptide_id=14055&scanf=17896	http:/kronos.stanford.edu/gfy/www/modules/ascore/visual/trim-phos.php?run_id=&search_id=21634&scans_id=16839&peptide_id=14055&charge=2	2.29053e+06	0.879475	0.0396506	0.416012	0.0199057	0.0841033	20.8992
Arf-GAP domain and FG repeat-containing protein 1 OS=Mus musculus GN=Agfg1 PE=1 SV=1	tr|A0A087WNV1|A0A087WNV1_MOUSE	258	T	SSSADFGT|79.97|FSTSQSHQTASTVSK	1	SSADFGT*FSTSQS	1	10.36	3.178	0.0007	0.4434	68.18	NO OTHERS:1	NONE > ascore = 13	1	0	0	6	SSSADFGTFSTSQSHQTASTVSK	ind_MOUSE.Tryp.TMT.REVUniprot20150423.CONTAM.fasta.hdr	21634	16839	4511	2	16841	21634	4511	16839	12303	2	16841	0.99	21634	4511	16839	12303	2	https://kronos.stanford.edu/cgi-bin/blast_html4?Db=/seq_db/static/ind_MOUSE.Tryp.TMT.REVUniprot20150423.CONTAM.fasta.hdr&Pep=SSSADFGTFSTSQSHQTASTVSK&MassType=0	https://kronos.stanford.edu/gfy/www/modules/show_out/show_out_wrapper.php?run_id=&search_id=&scans_id=&peptide_id=&scanf=&charge=	https://kronos.stanford.edu/gfy/www/modules/show_out/show_out_wrapper.php?run_id=16841&search_id=21634&scans_id=16839&peptide_id=4511&scanf=12303&charge=2	http://kronos.stanford.edu/gfy/www/modules/sdig/index.php?run_id=16841&search_id=21634&scans_id=16839&peptide_id=4511&scanf=12303	http:/kronos.stanford.edu/gfy/www/modules/ascore/visual/trim-phos.php?run_id=16841&search_id=21634&scans_id=16839&peptide_id=4511&charge=2	330448	0.92203	0.0198597	0.461663	0.0226674	0.0673382	20.3668
La-related protein 4B OS=Mus musculus GN=Larp4b PE=1 SV=2	sp|Q6A0A2|LAR4B_MOUSE	41	S	S|79.97|LPALTQVPTTK	1	TTSQTRS*LPALTQ	1	54.64	2.9999	0.367	0.4624	85.63	NO OTHERS:1	S|79.97|LPALTQVPTTK	1	0	0	2	SLPALTQVPTTK	ind_MOUSE.Tryp.TMT.REVUniprot20150423.CONTAM.fasta.hdr	21634	16839	25095	2	16841	21634	25095	16839	23548	2	16841	0.99	21634	25095	16839	23548	2	https://kronos.stanford.edu/cgi-bin/blast_html4?Db=/seq_db/static/ind_MOUSE.Tryp.TMT.REVUniprot20150423.CONTAM.fasta.hdr&Pep=SLPALTQVPTTK&MassType=0	https://kronos.stanford.edu/gfy/www/modules/show_out/show_out_wrapper.php?run_id=&search_id=&scans_id=&peptide_id=&scanf=&charge=	https://kronos.stanford.edu/gfy/www/modules/show_out/show_out_wrapper.php?run_id=16841&search_id=21634&scans_id=16839&peptide_id=25095&scanf=23548&charge=2	http://kronos.stanford.edu/gfy/www/modules/sdig/index.php?run_id=16841&search_id=21634&scans_id=16839&peptide_id=25095&scanf=23548	http:/kronos.stanford.edu/gfy/www/modules/ascore/visual/trim-phos.php?run_id=16841&search_id=21634&scans_id=16839&peptide_id=25095&charge=2	799342	0.995883	0.0327537	0.611091	0.030031	0.0695888	20.3487
Brain acid soluble protein 1 OS=Mus musculus GN=Basp1 PE=1 SV=3	sp|Q91XV3|BASP1_MOUSE	172	S	SDAAPAASDSKPS|79.97|SAEPAPSSK	1	ASDSKPS*SAEPAP	5	18.49	3.8523	0.0404	0.3083	65.47	NO OTHERS:3; NONE > thresh = 13:2	SDAAPAASDSKPS|79.97|SAEPAPSSK	3	2	0	0	SDAAPAASDSKPSSAEPAPSSK	ind_MOUSE.Tryp.TMT.REVUniprot20150423.CONTAM.fasta.hdr	21638	16834	82050	4		21639	335	16833	10094	4	16835	0.99	21637	80042	16835	10094	4	https://kronos.stanford.edu/cgi-bin/blast_html4?Db=/seq_db/static/ind_MOUSE.Tryp.TMT.REVUniprot20150423.CONTAM.fasta.hdr&Pep=SDAAPAASDSKPSSAEPAPSSK&MassType=0	https://kronos.stanford.edu/gfy/www/modules/show_out/show_out_wrapper.php?run_id=&search_id=&scans_id=&peptide_id=&scanf=&charge=	https://kronos.stanford.edu/gfy/www/modules/show_out/show_out_wrapper.php?run_id=16835&search_id=21639&scans_id=16833&peptide_id=335&scanf=10094&charge=4	http://kronos.stanford.edu/gfy/www/modules/sdig/index.php?run_id=16835&search_id=21639&scans_id=16833&peptide_id=335&scanf=10094	http:/kronos.stanford.edu/gfy/www/modules/ascore/visual/trim-phos.php?run_id=&search_id=21638&scans_id=16834&peptide_id=82050&charge=4	4.52769e+06	0.976118	0.0358309	0.530776	0.0267771	0.0409539	19.8221
E3 SUMO-protein ligase RanBP2 OS=Mus musculus GN=Ranbp2 PE=1 SV=2	sp|Q9ERU9|RBP2_MOUSE	1664	S	SQS|79.97|NESAGSQVGTEFK	1	VGSKSQS*NESAGS	1	0	2.5419	0.0677	0.536	50.73	NO OTHERS:1	NONE > ascore = 13	1	0	0	0	SQSNESAGSQVGTEFK	ind_MOUSE.Tryp.TMT.REVUniprot20150423.CONTAM.fasta.hdr	21638	16834	9869	2	16836	21638	9869	16834	15218	2	16836	0.99	21638	9869	16834	15218	2	https://kronos.stanford.edu/cgi-bin/blast_html4?Db=/seq_db/static/ind_MOUSE.Tryp.TMT.REVUniprot20150423.CONTAM.fasta.hdr&Pep=SQSNESAGSQVGTEFK&MassType=0	https://kronos.stanford.edu/gfy/www/modules/show_out/show_out_wrapper.php?run_id=&search_id=&scans_id=&peptide_id=&scanf=&charge=	https://kronos.stanford.edu/gfy/www/modules/show_out/show_out_wrapper.php?run_id=16836&search_id=21638&scans_id=16834&peptide_id=9869&scanf=15218&charge=2	http://kronos.stanford.edu/gfy/www/modules/sdig/index.php?run_id=16836&search_id=21638&scans_id=16834&peptide_id=9869&scanf=15218	http:/kronos.stanford.edu/gfy/www/modules/ascore/visual/trim-phos.php?run_id=16836&search_id=21638&scans_id=16834&peptide_id=9869&charge=2	1.87876e+06	0.992818	0.0298162	0.565635	0.0290646	0.0480012	19.4613
Rab3 GTPase-activating protein non-catalytic subunit OS=Mus musculus GN=Rab3gap2 PE=1 SV=1	tr|A0A0A6YWM5|A0A0A6YWM5_MOUSE	567	S	AKS|79.97|PRPDSFETEIK	1	ALLRAKS*PRPDSF	1	22.59	2.7653	0.2478	0.2478	15.27	NO OTHERS:1	AKS|79.97|PRPDSFETEIK	1	0	0	2	AKSPRPDSFETEIK	ind_MOUSE.Tryp.TMT.REVUniprot20150423.CONTAM.fasta.hdr	21636	16836	4696	4	16838	21636	4696	16836	12529	4	16838	0.99	21636	4696	16836	12529	4	https://kronos.stanford.edu/cgi-bin/blast_html4?Db=/seq_db/static/ind_MOUSE.Tryp.TMT.REVUniprot20150423.CONTAM.fasta.hdr&Pep=AKSPRPDSFETEIK&MassType=0	https://kronos.stanford.edu/gfy/www/modules/show_out/show_out_wrapper.php?run_id=&search_id=&scans_id=&peptide_id=&scanf=&charge=	https://kronos.stanford.edu/gfy/www/modules/show_out/show_out_wrapper.php?run_id=16838&search_id=21636&scans_id=16836&peptide_id=4696&scanf=12529&charge=4	http://kronos.stanford.edu/gfy/www/modules/sdig/index.php?run_id=16838&search_id=21636&scans_id=16836&peptide_id=4696&scanf=12529	http:/kronos.stanford.edu/gfy/www/modules/ascore/visual/trim-phos.php?run_id=16838&search_id=21636&scans_id=16836&peptide_id=4696&charge=4	5.26391e+06	0.894045	0.0269971	0.462843	0.0245479	0.0325961	18.8547
Ataxin-3 OS=Mus musculus GN=Atxn3 PE=1 SV=1	tr|E9Q717|E9Q717_MOUSE	261	S	AIQLSMQGSS|79.97|R	1	LSMQGSS*RSMCEN	2	0	2.2938	0.0185	0.4155	64.39	NO OTHERS:2	NONE > ascore = 13	2	0	0	3	AIQLSMQGSSR	ind_MOUSE.Tryp.TMT.REVUniprot20150423.CONTAM.fasta.hdr	21636	16836	11759	2	16838	21634	9318	16839	15083	2		0.99	21634	9318	16839	16688	2	https://kronos.stanford.edu/cgi-bin/blast_html4?Db=/seq_db/static/ind_MOUSE.Tryp.TMT.REVUniprot20150423.CONTAM.fasta.hdr&Pep=AIQLSMQGSSR&MassType=0	https://kronos.stanford.edu/gfy/www/modules/show_out/show_out_wrapper.php?run_id=&search_id=&scans_id=&peptide_id=&scanf=&charge=	https://kronos.stanford.edu/gfy/www/modules/show_out/show_out_wrapper.php?run_id=&search_id=21634&scans_id=16839&peptide_id=9318&scanf=15083&charge=2	http://kronos.stanford.edu/gfy/www/modules/sdig/index.php?run_id=&search_id=21634&scans_id=16839&peptide_id=9318&scanf=15083	http:/kronos.stanford.edu/gfy/www/modules/ascore/visual/trim-phos.php?run_id=16838&search_id=21636&scans_id=16836&peptide_id=11759&charge=2	5.35084e+06	0.958109	0.0323921	0.516361	0.0276644	0.0269131	18.6652
A-kinase anchor protein 2 OS=Mus musculus GN=Akap2 PE=4 SV=1	tr|A2API8|A2API8_MOUSE	53	S	S|79.97|VPGVTSTPHSK	1	SVAECKS*VPGVTS	1	39.72	2.6818	0.271	0.3783	45.24	NO OTHERS:1	S|79.97|VPGVTSTPHSK	1	0	0	6	SVPGVTSTPHSK	ind_MOUSE.Tryp.TMT.REVUniprot20150423.CONTAM.fasta.hdr	21636	16836	77979	3	16838	21636	77979	16836	8348	3	16838	0.99	21636	77979	16836	8348	3	https://kronos.stanford.edu/cgi-bin/blast_html4?Db=/seq_db/static/ind_MOUSE.Tryp.TMT.REVUniprot20150423.CONTAM.fasta.hdr&Pep=SVPGVTSTPHSK&MassType=0	https://kronos.stanford.edu/gfy/www/modules/show_out/show_out_wrapper.php?run_id=&search_id=&scans_id=&peptide_id=&scanf=&charge=	https://kronos.stanford.edu/gfy/www/modules/show_out/show_out_wrapper.php?run_id=16838&search_id=21636&scans_id=16836&peptide_id=77979&scanf=8348&charge=3	http://kronos.stanford.edu/gfy/www/modules/sdig/index.php?run_id=16838&search_id=21636&scans_id=16836&peptide_id=77979&scanf=8348	http:/kronos.stanford.edu/gfy/www/modules/ascore/visual/trim-phos.php?run_id=16838&search_id=21636&scans_id=16836&peptide_id=77979&charge=3	2.76911e+06	0.980705	0.0354283	0.67609	0.0371859	0.05694	18.1813
Eukaryotic translation initiation factor 4H OS=Mus musculus GN=Eif4h PE=1 SV=3	sp|Q9WUK2|IF4H_MOUSE	21	S	AYSSFGGGRGS|79.97|R	1	FGGGRGS*RGSAGG	1	40.36	2.229	0.3471	0.3471	37.78	NO OTHERS:1	AYSSFGGGRGS|79.97|R	1	0	0	1	AYSSFGGGRGSR	ind_MOUSE.Tryp.TMT.REVUniprot20150423.CONTAM.fasta.hdr	21634	16839	65412	2	16841	21634	65412	16839	4684	2	16841	0.99	21634	65412	16839	4684	2	https://kronos.stanford.edu/cgi-bin/blast_html4?Db=/seq_db/static/ind_MOUSE.Tryp.TMT.REVUniprot20150423.CONTAM.fasta.hdr&Pep=AYSSFGGGRGSR&MassType=0	https://kronos.stanford.edu/gfy/www/modules/show_out/show_out_wrapper.php?run_id=&search_id=&scans_id=&peptide_id=&scanf=&charge=	https://kronos.stanford.edu/gfy/www/modules/show_out/show_out_wrapper.php?run_id=16841&search_id=21634&scans_id=16839&peptide_id=65412&scanf=4684&charge=2	http://kronos.stanford.edu/gfy/www/modules/sdig/index.php?run_id=16841&search_id=21634&scans_id=16839&peptide_id=65412&scanf=4684	http:/kronos.stanford.edu/gfy/www/modules/ascore/visual/trim-phos.php?run_id=16841&search_id=21634&scans_id=16839&peptide_id=65412&charge=2	1.24561e+06	0.99921	0.0524995	0.577856	0.0320061	0.0505615	18.0545
Homeodomain-interacting protein kinase 4 OS=Mus musculus GN=Hipk4 PE=1 SV=2	sp|Q3V016|HIPK4_MOUSE	531	T	T|79.97|TSTEPSVIPQR	1	EEGEGRT*TSTEPS	1	19.21	2.1095	0.0451	0.2197	54.85	NO OTHERS:1	T|79.97|TSTEPSVIPQR	1	0	0	1	TTSTEPSVIPQR	ind_MOUSE.Tryp.TMT.REVUniprot20150423.CONTAM.fasta.hdr	21638	16834	6443	2	16836	21638	6443	16834	13281	2	16836	0.99	21638	6443	16834	13281	2	https://kronos.stanford.edu/cgi-bin/blast_html4?Db=/seq_db/static/ind_MOUSE.Tryp.TMT.REVUniprot20150423.CONTAM.fasta.hdr&Pep=TTSTEPSVIPQR&MassType=0	https://kronos.stanford.edu/gfy/www/modules/show_out/show_out_wrapper.php?run_id=&search_id=&scans_id=&peptide_id=&scanf=&charge=	https://kronos.stanford.edu/gfy/www/modules/show_out/show_out_wrapper.php?run_id=16836&search_id=21638&scans_id=16834&peptide_id=6443&scanf=13281&charge=2	http://kronos.stanford.edu/gfy/www/modules/sdig/index.php?run_id=16836&search_id=21638&scans_id=16834&peptide_id=6443&scanf=13281	http:/kronos.stanford.edu/gfy/www/modules/ascore/visual/trim-phos.php?run_id=16836&search_id=21638&scans_id=16834&peptide_id=6443&charge=2	8.23857e+06	0.891112	0.0310176	0.430441	0.0241883	0.081773	17.7954
Treacle protein (Fragment) OS=Mus musculus GN=Tcof1 PE=1 SV=1	tr|H3BIX0|H3BIX0_MOUSE	1023	S	ATPRPDS|79.97|NSLASSAPATK	1	ATPRPDS*NSLASS	3	24.15	3.0201	0.1256	0.4986	70.54	NO OTHERS:3	ATPRPDS|79.97|NSLASSAPATK, ATPRPDS|79.97|NSLASSAPATKDNPDGK	3	0	0	2	ATPRPDSNSLASSAPATK	ind_MOUSE.Tryp.TMT.REVUniprot20150423.CONTAM.fasta.hdr	21637	16835	83651	3	16837	21637	83651	16835	9617	3	16837	0.99	21637	83651	16835	9617	3	https://kronos.stanford.edu/cgi-bin/blast_html4?Db=/seq_db/static/ind_MOUSE.Tryp.TMT.REVUniprot20150423.CONTAM.fasta.hdr&Pep=ATPRPDSNSLASSAPATK&MassType=0	https://kronos.stanford.edu/gfy/www/modules/show_out/show_out_wrapper.php?run_id=&search_id=&scans_id=&peptide_id=&scanf=&charge=	https://kronos.stanford.edu/gfy/www/modules/show_out/show_out_wrapper.php?run_id=16837&search_id=21637&scans_id=16835&peptide_id=83651&scanf=9617&charge=3	http://kronos.stanford.edu/gfy/www/modules/sdig/index.php?run_id=16837&search_id=21637&scans_id=16835&peptide_id=83651&scanf=9617	http:/kronos.stanford.edu/gfy/www/modules/ascore/visual/trim-phos.php?run_id=16837&search_id=21637&scans_id=16835&peptide_id=83651&charge=3	4.56631e+06	0.981531	0.0284529	0.695528	0.0391941	0.0483912	17.7458
Protein Lrrc37a (Fragment) OS=Mus musculus GN=Lrrc37a PE=4 SV=1	tr|B1AWG4|B1AWG4_MOUSE	2405	S	GTLTILNFHGNVIS|79.97|Y|79.97|IDK	1	FHGNVIS*YIDKNV	1	29.43	2.4485	0.249	0.249	32.83	100 days, 6:01:00	GTLTILNFHGNVIS|79.97|Y|79.97|IDK	0	1	0	0	GTLTILNFHGNVISYIDK	ind_MOUSE.Tryp.TMT.REVUniprot20150423.CONTAM.fasta.hdr	21638	16834	13062	3	16836	21638	13062	16834	17171	3	16836	0.99	21638	13062	16834	17171	3	https://kronos.stanford.edu/cgi-bin/blast_html4?Db=/seq_db/static/ind_MOUSE.Tryp.TMT.REVUniprot20150423.CONTAM.fasta.hdr&Pep=GTLTILNFHGNVISYIDK&MassType=0	https://kronos.stanford.edu/gfy/www/modules/show_out/show_out_wrapper.php?run_id=&search_id=&scans_id=&peptide_id=&scanf=&charge=	https://kronos.stanford.edu/gfy/www/modules/show_out/show_out_wrapper.php?run_id=16836&search_id=21638&scans_id=16834&peptide_id=13062&scanf=17171&charge=3	http://kronos.stanford.edu/gfy/www/modules/sdig/index.php?run_id=16836&search_id=21638&scans_id=16834&peptide_id=13062&scanf=17171	http:/kronos.stanford.edu/gfy/www/modules/ascore/visual/trim-phos.php?run_id=16836&search_id=21638&scans_id=16834&peptide_id=13062&charge=3	2.57269e+06	0.905567	0.021677	0.437342	0.0247108	0.122279	17.6985
Protein Lrrc37a (Fragment) OS=Mus musculus GN=Lrrc37a PE=4 SV=1	tr|B1AWG4|B1AWG4_MOUSE	2406	Y	GTLTILNFHGNVIS|79.97|Y|79.97|IDK	2	HGNVISY*IDKNVW	1		2.4485	0.249	0.249	32.83	100 days, 5:01:00	NONE > ascore = 13	0	1	0	0	GTLTILNFHGNVISYIDK	ind_MOUSE.Tryp.TMT.REVUniprot20150423.CONTAM.fasta.hdr	21638	16834	13062	3	16836	21638	13062	16834	17171	3	16836	0.99	21638	13062	16834	17171	3	https://kronos.stanford.edu/cgi-bin/blast_html4?Db=/seq_db/static/ind_MOUSE.Tryp.TMT.REVUniprot20150423.CONTAM.fasta.hdr&Pep=GTLTILNFHGNVISYIDK&MassType=0	https://kronos.stanford.edu/gfy/www/modules/show_out/show_out_wrapper.php?run_id=&search_id=&scans_id=&peptide_id=&scanf=&charge=	https://kronos.stanford.edu/gfy/www/modules/show_out/show_out_wrapper.php?run_id=16836&search_id=21638&scans_id=16834&peptide_id=13062&scanf=17171&charge=3	http://kronos.stanford.edu/gfy/www/modules/sdig/index.php?run_id=16836&search_id=21638&scans_id=16834&peptide_id=13062&scanf=17171	http:/kronos.stanford.edu/gfy/www/modules/ascore/visual/trim-phos.php?run_id=16836&search_id=21638&scans_id=16834&peptide_id=13062&charge=3	2.57269e+06	0.905567	0.021677	0.437342	0.0247108	0.122279	17.6985
Eukaryotic peptide chain release factor GTP-binding subunit ERF3A OS=Mus musculus GN=Gspt1 PE=1 SV=2	sp|Q8R050|ERF3A_MOUSE	199	S	S|79.97|AVAPPGAPK	1	EIPKPKS*AVAPPG	2	1000	2.4439	0.3936	0.3936	71.82	NO OTHERS:2	S|79.97|AVAPPGAPK	2	0	0	1	SAVAPPGAPK	ind_MOUSE.Tryp.TMT.REVUniprot20150423.CONTAM.fasta.hdr	21637	16835	2649	2	16837	21636	687	16836	10349	2		0.99	21636	687	16836	11317	2	https://kronos.stanford.edu/cgi-bin/blast_html4?Db=/seq_db/static/ind_MOUSE.Tryp.TMT.REVUniprot20150423.CONTAM.fasta.hdr&Pep=SAVAPPGAPK&MassType=0	https://kronos.stanford.edu/gfy/www/modules/show_out/show_out_wrapper.php?run_id=&search_id=&scans_id=&peptide_id=&scanf=&charge=	https://kronos.stanford.edu/gfy/www/modules/show_out/show_out_wrapper.php?run_id=&search_id=21636&scans_id=16836&peptide_id=687&scanf=10349&charge=2	http://kronos.stanford.edu/gfy/www/modules/sdig/index.php?run_id=&search_id=21636&scans_id=16836&peptide_id=687&scanf=10349	http:/kronos.stanford.edu/gfy/www/modules/ascore/visual/trim-phos.php?run_id=16837&search_id=21637&scans_id=16835&peptide_id=2649&charge=2	5.64364e+06	0.970732	0.0491775	0.699243	0.0404555	0.0426697	17.2843
Arf-GAP domain and FG repeat-containing protein 1 OS=Mus musculus GN=Agfg1 PE=1 SV=1	tr|A0A087WNV1|A0A087WNV1_MOUSE	262	S	SSSADFGTFSTS|79.97|QSHQTASTVSK	1	FGTFSTS*QSHQTA	1	0	2.3391	0.004	0.4903	54.61	NO OTHERS:1	NONE > ascore = 13	1	0	0	6	SSSADFGTFSTSQSHQTASTVSK	ind_MOUSE.Tryp.TMT.REVUniprot20150423.CONTAM.fasta.hdr	21636	16836	6515	2	16838	21636	6515	16836	13603	2	16838	0.99	21636	6515	16836	13603	2	https://kronos.stanford.edu/cgi-bin/blast_html4?Db=/seq_db/static/ind_MOUSE.Tryp.TMT.REVUniprot20150423.CONTAM.fasta.hdr&Pep=SSSADFGTFSTSQSHQTASTVSK&MassType=0	https://kronos.stanford.edu/gfy/www/modules/show_out/show_out_wrapper.php?run_id=&search_id=&scans_id=&peptide_id=&scanf=&charge=	https://kronos.stanford.edu/gfy/www/modules/show_out/show_out_wrapper.php?run_id=16838&search_id=21636&scans_id=16836&peptide_id=6515&scanf=13603&charge=2	http://kronos.stanford.edu/gfy/www/modules/sdig/index.php?run_id=16838&search_id=21636&scans_id=16836&peptide_id=6515&scanf=13603	http:/kronos.stanford.edu/gfy/www/modules/ascore/visual/trim-phos.php?run_id=16838&search_id=21636&scans_id=16836&peptide_id=6515&charge=2	302554	0.985074	0.0281503	0.536576	0.0316965	0.0609584	16.9286
Nucleosome assembly protein 1-like 1 OS=Mus musculus GN=Nap1l1 PE=1 SV=1	tr|E9PW66|E9PW66_MOUSE	89	T	LDGLVDT|79.97|PTGYIESLPK	1	LDGLVDT*PTGYIE	8	37.41	3.3296	0.0906	0.5694	79.99	NO OTHERS:8	LDGLVDT|79.97|PTGYIESLPK	8	0	0	1	LDGLVDTPTGYIESLPK	ind_MOUSE.Tryp.TMT.REVUniprot20150423.CONTAM.fasta.hdr	21636	16836	52184	2		21636	52184	16836	39080	2		0.99	21636	52184	16836	41083	2	https://kronos.stanford.edu/cgi-bin/blast_html4?Db=/seq_db/static/ind_MOUSE.Tryp.TMT.REVUniprot20150423.CONTAM.fasta.hdr&Pep=LDGLVDTPTGYIESLPK&MassType=0	https://kronos.stanford.edu/gfy/www/modules/show_out/show_out_wrapper.php?run_id=&search_id=&scans_id=&peptide_id=&scanf=&charge=	https://kronos.stanford.edu/gfy/www/modules/show_out/show_out_wrapper.php?run_id=&search_id=21636&scans_id=16836&peptide_id=52184&scanf=39080&charge=2	http://kronos.stanford.edu/gfy/www/modules/sdig/index.php?run_id=&search_id=21636&scans_id=16836&peptide_id=52184&scanf=39080	http:/kronos.stanford.edu/gfy/www/modules/ascore/visual/trim-phos.php?run_id=&search_id=21636&scans_id=16836&peptide_id=52184&charge=2	1.78856e+07	0.986664	0.0853713	0.517909	0.0314107	0.0925994	16.4883
Talin-1 OS=Mus musculus GN=Tln1 PE=1 SV=2	sp|P26039|TLN1_MOUSE	1324	T	ALST|79.97|DPASPNLK	1	AAKALST*DPASPN	1	11.51	2.1796	0.0129	0.3796	49.98	NO OTHERS:1	NONE > ascore = 13	1	0	0	0	ALSTDPASPNLK	ind_MOUSE.Tryp.TMT.REVUniprot20150423.CONTAM.fasta.hdr	21635	16837	4278	2	16839	21635	4278	16837	12549	2	16839	0.99	21635	4278	16837	12549	2	https://kronos.stanford.edu/cgi-bin/blast_html4?Db=/seq_db/static/ind_MOUSE.Tryp.TMT.REVUniprot20150423.CONTAM.fasta.hdr&Pep=ALSTDPASPNLK&MassType=0	https://kronos.stanford.edu/gfy/www/modules/show_out/show_out_wrapper.php?run_id=&search_id=&scans_id=&peptide_id=&scanf=&charge=	https://kronos.stanford.edu/gfy/www/modules/show_out/show_out_wrapper.php?run_id=16839&search_id=21635&scans_id=16837&peptide_id=4278&scanf=12549&charge=2	http://kronos.stanford.edu/gfy/www/modules/sdig/index.php?run_id=16839&search_id=21635&scans_id=16837&peptide_id=4278&scanf=12549	http:/kronos.stanford.edu/gfy/www/modules/ascore/visual/trim-phos.php?run_id=16839&search_id=21635&scans_id=16837&peptide_id=4278&charge=2	171433	0.963341	0.0614367	0.485109	0.0312443	0.0362176	15.5263
Pericentriolar material 1 protein OS=Mus musculus GN=Pcm1 PE=1 SV=2	sp|Q9R0L6|PCM1_MOUSE	1421	Y	ALY|79.97|ALQDIVSR	1	LRQRALY*ALQDIV	2	139.06	3.3839	0.3703	0.3703	149.75	NO OTHERS:2	ALY|79.97|ALQDIVSR	2	0	0	1	ALYALQDIVSR	ind_MOUSE.Tryp.TMT.REVUniprot20150423.CONTAM.fasta.hdr	21636	16836	44838	2		21636	44838	16836	35129	2		0.99	21636	44838	16836	41904	2	https://kronos.stanford.edu/cgi-bin/blast_html4?Db=/seq_db/static/ind_MOUSE.Tryp.TMT.REVUniprot20150423.CONTAM.fasta.hdr&Pep=ALYALQDIVSR&MassType=0	https://kronos.stanford.edu/gfy/www/modules/show_out/show_out_wrapper.php?run_id=&search_id=&scans_id=&peptide_id=&scanf=&charge=	https://kronos.stanford.edu/gfy/www/modules/show_out/show_out_wrapper.php?run_id=&search_id=21636&scans_id=16836&peptide_id=44838&scanf=35129&charge=2	http://kronos.stanford.edu/gfy/www/modules/sdig/index.php?run_id=&search_id=21636&scans_id=16836&peptide_id=44838&scanf=35129	http:/kronos.stanford.edu/gfy/www/modules/ascore/visual/trim-phos.php?run_id=&search_id=21636&scans_id=16836&peptide_id=44838&charge=2	441281	-0.0676796	0.00989572	0.157173	0.0104359	0.719711	15.0607
SH3 domain-containing kinase-binding protein 1 (Fragment) OS=Mus musculus GN=Sh3kbp1 PE=4 SV=1	tr|B0R0Y8|B0R0Y8_MOUSE	130	S	AS|79.97|SPSLFSTEGKPK	1	TAGQRAS*SPSLFS	1	0	1.6357	0.0468	0.3163	38.9	NO OTHERS:1	NONE > ascore = 13	1	0	0	7	ASSPSLFSTEGKPK	ind_MOUSE.Tryp.TMT.REVUniprot20150423.CONTAM.fasta.hdr	21634	16839	10153	2	16841	21634	10153	16839	15558	2	16841	0.99	21634	10153	16839	15558	2	https://kronos.stanford.edu/cgi-bin/blast_html4?Db=/seq_db/static/ind_MOUSE.Tryp.TMT.REVUniprot20150423.CONTAM.fasta.hdr&Pep=ASSPSLFSTEGKPK&MassType=0	https://kronos.stanford.edu/gfy/www/modules/show_out/show_out_wrapper.php?run_id=&search_id=&scans_id=&peptide_id=&scanf=&charge=	https://kronos.stanford.edu/gfy/www/modules/show_out/show_out_wrapper.php?run_id=16841&search_id=21634&scans_id=16839&peptide_id=10153&scanf=15558&charge=2	http://kronos.stanford.edu/gfy/www/modules/sdig/index.php?run_id=16841&search_id=21634&scans_id=16839&peptide_id=10153&scanf=15558	http:/kronos.stanford.edu/gfy/www/modules/ascore/visual/trim-phos.php?run_id=16841&search_id=21634&scans_id=16839&peptide_id=10153&charge=2	1.14608e+06	0.928259	0.0435876	0.722934	0.0480997	0.058244	15.0299
Disks large homolog 4 OS=Mus musculus GN=Dlg4 PE=1 SV=1	sp|Q62108|DLG4_MOUSE	654	S	S|79.97|LENVLEINKR	1	IFIRPRS*LENVLE	1	1000	3.065	0.3127	0.3127	67.41	NO OTHERS:1	S|79.97|LENVLEINKR	1	0	0	2	SLENVLEINKR	ind_MOUSE.Tryp.TMT.REVUniprot20150423.CONTAM.fasta.hdr	21636	16836	22574	3	16838	21636	22574	16836	22789	3	16838	0.99	21636	22574	16836	22789	3	https://kronos.stanford.edu/cgi-bin/blast_html4?Db=/seq_db/static/ind_MOUSE.Tryp.TMT.REVUniprot20150423.CONTAM.fasta.hdr&Pep=SLENVLEINKR&MassType=0	https://kronos.stanford.edu/gfy/www/modules/show_out/show_out_wrapper.php?run_id=&search_id=&scans_id=&peptide_id=&scanf=&charge=	https://kronos.stanford.edu/gfy/www/modules/show_out/show_out_wrapper.php?run_id=16838&search_id=21636&scans_id=16836&peptide_id=22574&scanf=22789&charge=3	http://kronos.stanford.edu/gfy/www/modules/sdig/index.php?run_id=16838&search_id=21636&scans_id=16836&peptide_id=22574&scanf=22789	http:/kronos.stanford.edu/gfy/www/modules/ascore/visual/trim-phos.php?run_id=16838&search_id=21636&scans_id=16836&peptide_id=22574&charge=3	555279	0.897134	0.023925	0.453379	0.0319939	0.0466381	14.1708
Eukaryotic translation initiation factor 2D OS=Mus musculus GN=Eif2d PE=4 SV=1	tr|E9PUG7|E9PUG7_MOUSE	241	S	APSQDS|79.97|LDGKPLQEQMDDLLLR	1	RAPSQDS*LDGKPL	4	33.47	3.787	0.1916	0.332	81.63	NO OTHERS:4	APSQDS|79.97|LDGKPLQEQMDDLLLR	4	0	0	3	APSQDSLDGKPLQEQMDDLLLR	ind_MOUSE.Tryp.TMT.REVUniprot20150423.CONTAM.fasta.hdr	21638	16834	51797	3	16836	21637	44501	16835	34358	3		0.99	21637	44501	16835	38288	3	https://kronos.stanford.edu/cgi-bin/blast_html4?Db=/seq_db/static/ind_MOUSE.Tryp.TMT.REVUniprot20150423.CONTAM.fasta.hdr&Pep=APSQDSLDGKPLQEQMDDLLLR&MassType=0	https://kronos.stanford.edu/gfy/www/modules/show_out/show_out_wrapper.php?run_id=&search_id=&scans_id=&peptide_id=&scanf=&charge=	https://kronos.stanford.edu/gfy/www/modules/show_out/show_out_wrapper.php?run_id=&search_id=21637&scans_id=16835&peptide_id=44501&scanf=34358&charge=3	http://kronos.stanford.edu/gfy/www/modules/sdig/index.php?run_id=&search_id=21637&scans_id=16835&peptide_id=44501&scanf=34358	http:/kronos.stanford.edu/gfy/www/modules/ascore/visual/trim-phos.php?run_id=16836&search_id=21638&scans_id=16834&peptide_id=51797&charge=3	3.56993e+06	0.806364	0.0283441	0.370219	0.0267875	0.222378	13.8206
Sorting nexin-2 OS=Mus musculus GN=Snx2 PE=1 SV=2	sp|Q9CWK8|SNX2_MOUSE	117	S	S|79.97|ISAPVIFDR	1	PRIESKS*ISAPVI	3	27.7	2.5402	0.0498	0.2632	49.47	NO OTHERS:3	S|79.97|ISAPVIFDR	3	0	0	0	SISAPVIFDR	ind_MOUSE.Tryp.TMT.REVUniprot20150423.CONTAM.fasta.hdr	21638	16834	36625	2	16836	21636	30490	16836	27136	2		0.99	21636	30490	16836	30112	2	https://kronos.stanford.edu/cgi-bin/blast_html4?Db=/seq_db/static/ind_MOUSE.Tryp.TMT.REVUniprot20150423.CONTAM.fasta.hdr&Pep=SISAPVIFDR&MassType=0	https://kronos.stanford.edu/gfy/www/modules/show_out/show_out_wrapper.php?run_id=&search_id=&scans_id=&peptide_id=&scanf=&charge=	https://kronos.stanford.edu/gfy/www/modules/show_out/show_out_wrapper.php?run_id=&search_id=21636&scans_id=16836&peptide_id=30490&scanf=27136&charge=2	http://kronos.stanford.edu/gfy/www/modules/sdig/index.php?run_id=&search_id=21636&scans_id=16836&peptide_id=30490&scanf=27136	http:/kronos.stanford.edu/gfy/www/modules/ascore/visual/trim-phos.php?run_id=16836&search_id=21638&scans_id=16834&peptide_id=36625&charge=2	3.88588e+06	0.984673	0.0543829	0.613664	0.0447988	0.0619344	13.6982
KN motif and ankyrin repeat domain-containing protein 2 OS=Mus musculus GN=Kank2 PE=1 SV=1	sp|Q8BX02|KANK2_MOUSE	358	S	AQS|79.97|LEPYGTGLK	1	LAQRAQS*LEPYGT	4	59.3	2.0969	0.1134	0.4658	68.03	NO OTHERS:4	AQS|79.97|LEPYGTGLK	4	0	0	1	AQSLEPYGTGLK	ind_MOUSE.Tryp.TMT.REVUniprot20150423.CONTAM.fasta.hdr	21635	16837	8440	2		21635	8440	16837	14981	2		0.99	21635	8440	16837	24025	2	https://kronos.stanford.edu/cgi-bin/blast_html4?Db=/seq_db/static/ind_MOUSE.Tryp.TMT.REVUniprot20150423.CONTAM.fasta.hdr&Pep=AQSLEPYGTGLK&MassType=0	https://kronos.stanford.edu/gfy/www/modules/show_out/show_out_wrapper.php?run_id=&search_id=&scans_id=&peptide_id=&scanf=&charge=	https://kronos.stanford.edu/gfy/www/modules/show_out/show_out_wrapper.php?run_id=&search_id=21635&scans_id=16837&peptide_id=8440&scanf=14981&charge=2	http://kronos.stanford.edu/gfy/www/modules/sdig/index.php?run_id=&search_id=21635&scans_id=16837&peptide_id=8440&scanf=14981	http:/kronos.stanford.edu/gfy/www/modules/ascore/visual/trim-phos.php?run_id=&search_id=21635&scans_id=16837&peptide_id=8440&charge=2	6.40319e+06	0.994779	0.0421989	0.578243	0.0445319	0.0827354	12.9849
Armadillo repeat-containing X-linked protein 2 OS=Mus musculus GN=Armcx2 PE=2 SV=2	sp|Q6A058|ARMX2_MOUSE	272	T	VTQSPGT|79.97|VIPPLPPPSSVLPR	1	VTQSPGT*VIPPLP	1	15.18	3.3681	0.0024	0.5078	45.09	NO OTHERS:1	VTQSPGT|79.97|VIPPLPPPSSVLPR	1	0	0	0	VTQSPGTVIPPLPPPSSVLPR	ind_MOUSE.Tryp.TMT.REVUniprot20150423.CONTAM.fasta.hdr	21634	16839	46508	2	16841	21634	46508	16839	35572	2	16841	0.99	21634	46508	16839	35572	2	https://kronos.stanford.edu/cgi-bin/blast_html4?Db=/seq_db/static/ind_MOUSE.Tryp.TMT.REVUniprot20150423.CONTAM.fasta.hdr&Pep=VTQSPGTVIPPLPPPSSVLPR&MassType=0	https://kronos.stanford.edu/gfy/www/modules/show_out/show_out_wrapper.php?run_id=&search_id=&scans_id=&peptide_id=&scanf=&charge=	https://kronos.stanford.edu/gfy/www/modules/show_out/show_out_wrapper.php?run_id=16841&search_id=21634&scans_id=16839&peptide_id=46508&scanf=35572&charge=2	http://kronos.stanford.edu/gfy/www/modules/sdig/index.php?run_id=16841&search_id=21634&scans_id=16839&peptide_id=46508&scanf=35572	http:/kronos.stanford.edu/gfy/www/modules/ascore/visual/trim-phos.php?run_id=16841&search_id=21634&scans_id=16839&peptide_id=46508&charge=2	563642	0.998716	0.038704	0.549905	0.0426754	0.0544294	12.8858
Homeodomain-interacting protein kinase 4 OS=Mus musculus GN=Hipk4 PE=1 SV=2	sp|Q3V016|HIPK4_MOUSE	500	S	SDS|79.97|NFSNLIR	1	AGSKSDS*NFSNLI	1	0	2.2335	0.0675	0.2688	35.69	NO OTHERS:1	NONE > ascore = 13	1	0	0	1	SDSNFSNLIR	ind_MOUSE.Tryp.TMT.REVUniprot20150423.CONTAM.fasta.hdr	21638	16834	25562	2	16836	21638	25562	16834	24252	2	16836	0.99	21638	25562	16834	24252	2	https://kronos.stanford.edu/cgi-bin/blast_html4?Db=/seq_db/static/ind_MOUSE.Tryp.TMT.REVUniprot20150423.CONTAM.fasta.hdr&Pep=SDSNFSNLIR&MassType=0	https://kronos.stanford.edu/gfy/www/modules/show_out/show_out_wrapper.php?run_id=&search_id=&scans_id=&peptide_id=&scanf=&charge=	https://kronos.stanford.edu/gfy/www/modules/show_out/show_out_wrapper.php?run_id=16836&search_id=21638&scans_id=16834&peptide_id=25562&scanf=24252&charge=2	http://kronos.stanford.edu/gfy/www/modules/sdig/index.php?run_id=16836&search_id=21638&scans_id=16834&peptide_id=25562&scanf=24252	http:/kronos.stanford.edu/gfy/www/modules/ascore/visual/trim-phos.php?run_id=16836&search_id=21638&scans_id=16834&peptide_id=25562&charge=2	1.04872e+06	0.976952	0.0417612	0.651006	0.0522433	0.0580191	12.461
Apoptotic chromatin condensation inducer in the nucleus (Fragment) OS=Mus musculus GN=Acin1 PE=1 SV=1	tr|F6RJ39|F6RJ39_MOUSE	423	S	S|79.97|LS|79.97|PLSGTTDTK	1	PAQLLRS*LSPLSG	2	40.34	1.8547	0.0731	0.228	71.38	NO OTHERS:1; 425:1	S|79.97|LSPLSGTTDTK, S|79.97|LS|79.97|PLSGTTDTK	1	1	0	2	SLSPLSGTTDTK	ind_MOUSE.Tryp.TMT.REVUniprot20150423.CONTAM.fasta.hdr	21639	16833	30609	2	16835	21636	13558	16836	17741	2	16838	0.99	21636	13558	16836	17741	2	https://kronos.stanford.edu/cgi-bin/blast_html4?Db=/seq_db/static/ind_MOUSE.Tryp.TMT.REVUniprot20150423.CONTAM.fasta.hdr&Pep=SLSPLSGTTDTK&MassType=0	https://kronos.stanford.edu/gfy/www/modules/show_out/show_out_wrapper.php?run_id=&search_id=&scans_id=&peptide_id=&scanf=&charge=	https://kronos.stanford.edu/gfy/www/modules/show_out/show_out_wrapper.php?run_id=16838&search_id=21636&scans_id=16836&peptide_id=13558&scanf=17741&charge=2	http://kronos.stanford.edu/gfy/www/modules/sdig/index.php?run_id=16838&search_id=21636&scans_id=16836&peptide_id=13558&scanf=17741	http:/kronos.stanford.edu/gfy/www/modules/ascore/visual/trim-phos.php?run_id=16835&search_id=21639&scans_id=16833&peptide_id=30609&charge=2	1.19943e+06	0.938203	0.0318142	0.44755	0.0359662	0.15531	12.4436
UBX domain-containing protein 4 OS=Mus musculus GN=Ubxn4 PE=1 SV=1	sp|Q8VCH8|UBXN4_MOUSE	445	T	AT|79.97|STEPSNSASSSK	1	QTSARAT*STEPSN	2	11.43	2.6958	0.0333	0.4773	73.41	NO OTHERS:2	NONE > ascore = 13	2	0	0	0	ATSTEPSNSASSSK	ind_MOUSE.Tryp.TMT.REVUniprot20150423.CONTAM.fasta.hdr	21639	16833	80629	2	16835	21639	80629	16833	5312	2	16835	0.99	21639	80629	16833	5312	2	https://kronos.stanford.edu/cgi-bin/blast_html4?Db=/seq_db/static/ind_MOUSE.Tryp.TMT.REVUniprot20150423.CONTAM.fasta.hdr&Pep=ATSTEPSNSASSSK&MassType=0	https://kronos.stanford.edu/gfy/www/modules/show_out/show_out_wrapper.php?run_id=&search_id=&scans_id=&peptide_id=&scanf=&charge=	https://kronos.stanford.edu/gfy/www/modules/show_out/show_out_wrapper.php?run_id=16835&search_id=21639&scans_id=16833&peptide_id=80629&scanf=5312&charge=2	http://kronos.stanford.edu/gfy/www/modules/sdig/index.php?run_id=16835&search_id=21639&scans_id=16833&peptide_id=80629&scanf=5312	http:/kronos.stanford.edu/gfy/www/modules/ascore/visual/trim-phos.php?run_id=16835&search_id=21639&scans_id=16833&peptide_id=80629&charge=2	3.19325e+06	0.998939	0.0308429	0.588472	0.048241	0.0464927	12.1986
Annexin A1 OS=Mus musculus GN=Anxa1 PE=1 SV=2	sp|P10107|ANXA1_MOUSE	41	S	GGPGSAVSPYPS|79.97|FNVSSDVAALHK	1	AVSPYPS*FNVSSD	1	7.53	3.224	0.068	0.5738	52.93	NO OTHERS:1	NONE > ascore = 13	1	0	0	0	GGPGSAVSPYPSFNVSSDVAALHK	ind_MOUSE.Tryp.TMT.REVUniprot20150423.CONTAM.fasta.hdr	21634	16839	32034	2	16841	21634	32034	16839	27470	2	16841	0.99	21634	32034	16839	27470	2	https://kronos.stanford.edu/cgi-bin/blast_html4?Db=/seq_db/static/ind_MOUSE.Tryp.TMT.REVUniprot20150423.CONTAM.fasta.hdr&Pep=GGPGSAVSPYPSFNVSSDVAALHK&MassType=0	https://kronos.stanford.edu/gfy/www/modules/show_out/show_out_wrapper.php?run_id=&search_id=&scans_id=&peptide_id=&scanf=&charge=	https://kronos.stanford.edu/gfy/www/modules/show_out/show_out_wrapper.php?run_id=16841&search_id=21634&scans_id=16839&peptide_id=32034&scanf=27470&charge=2	http://kronos.stanford.edu/gfy/www/modules/sdig/index.php?run_id=16841&search_id=21634&scans_id=16839&peptide_id=32034&scanf=27470	http:/kronos.stanford.edu/gfy/www/modules/ascore/visual/trim-phos.php?run_id=16841&search_id=21634&scans_id=16839&peptide_id=32034&charge=2	270691	0.969029	0.0597249	0.5826	0.0481954	0.0897825	12.0883
Probable ATP-dependent RNA helicase DDX20 OS=Mus musculus GN=Ddx20 PE=1 SV=2	sp|Q9JJY4|DDX20_MOUSE	500	T	NT|79.97|SASALSARPK	1	TPSPRNT*SASALS	1	13.19	2.071	0.0219	0.3576	57.84	NO OTHERS:1	NT|79.97|SASALSARPK	1	0	0	0	NTSASALSARPK	ind_MOUSE.Tryp.TMT.REVUniprot20150423.CONTAM.fasta.hdr	21634	16839	71362	2	16841	21634	71362	16839	5797	2	16841	0.99	21634	71362	16839	5797	2	https://kronos.stanford.edu/cgi-bin/blast_html4?Db=/seq_db/static/ind_MOUSE.Tryp.TMT.REVUniprot20150423.CONTAM.fasta.hdr&Pep=NTSASALSARPK&MassType=0	https://kronos.stanford.edu/gfy/www/modules/show_out/show_out_wrapper.php?run_id=&search_id=&scans_id=&peptide_id=&scanf=&charge=	https://kronos.stanford.edu/gfy/www/modules/show_out/show_out_wrapper.php?run_id=16841&search_id=21634&scans_id=16839&peptide_id=71362&scanf=5797&charge=2	http://kronos.stanford.edu/gfy/www/modules/sdig/index.php?run_id=16841&search_id=21634&scans_id=16839&peptide_id=71362&scanf=5797	http:/kronos.stanford.edu/gfy/www/modules/ascore/visual/trim-phos.php?run_id=16841&search_id=21634&scans_id=16839&peptide_id=71362&charge=2	332764	0.982812	0.0804548	0.544905	0.0453507	0.0823492	12.0154
Homeodomain-interacting protein kinase 4 OS=Mus musculus GN=Hipk4 PE=1 SV=2	sp|Q3V016|HIPK4_MOUSE	21	T	GT|79.97|FGEVAK	1	EVLGKGT*FGEVAK	2	1000	1.8278	0.3489	0.3489	78.73	NO OTHERS:2	GT|79.97|FGEVAK	2	0	0	0	GTFGEVAK	ind_MOUSE.Tryp.TMT.REVUniprot20150423.CONTAM.fasta.hdr	21638	16834	14028	2	16836	21638	14028	16834	17762	2	16836	0.99	21638	14028	16834	17762	2	https://kronos.stanford.edu/cgi-bin/blast_html4?Db=/seq_db/static/ind_MOUSE.Tryp.TMT.REVUniprot20150423.CONTAM.fasta.hdr&Pep=GTFGEVAK&MassType=0	https://kronos.stanford.edu/gfy/www/modules/show_out/show_out_wrapper.php?run_id=&search_id=&scans_id=&peptide_id=&scanf=&charge=	https://kronos.stanford.edu/gfy/www/modules/show_out/show_out_wrapper.php?run_id=16836&search_id=21638&scans_id=16834&peptide_id=14028&scanf=17762&charge=2	http://kronos.stanford.edu/gfy/www/modules/sdig/index.php?run_id=16836&search_id=21638&scans_id=16834&peptide_id=14028&scanf=17762	http:/kronos.stanford.edu/gfy/www/modules/ascore/visual/trim-phos.php?run_id=16836&search_id=21638&scans_id=16834&peptide_id=14028&charge=2	4.26837e+06	0.916137	0.0275832	0.458635	0.0386102	0.0581475	11.8786
A-kinase anchor protein 2 OS=Mus musculus GN=Akap2 PE=4 SV=1	tr|A2API8|A2API8_MOUSE	727	S	EKGPSQPPTAAQPS|79.97|GPVNMEETRPEGGYFSK	1	PTAAQPS*GPVNME	1	11.66	4.4388	0.1537	0.4006	27.04	NO OTHERS:1	NONE > ascore = 13	1	0	0	6	EKGPSQPPTAAQPSGPVNMEETRPEGGYFSK	ind_MOUSE.Tryp.TMT.REVUniprot20150423.CONTAM.fasta.hdr	21636	16836	11616	4	16838	21636	11616	16836	16605	4	16838	0.99	21636	11616	16836	16605	4	https://kronos.stanford.edu/cgi-bin/blast_html4?Db=/seq_db/static/ind_MOUSE.Tryp.TMT.REVUniprot20150423.CONTAM.fasta.hdr&Pep=EKGPSQPPTAAQPSGPVNMEETRPEGGYFSK&MassType=0	https://kronos.stanford.edu/gfy/www/modules/show_out/show_out_wrapper.php?run_id=&search_id=&scans_id=&peptide_id=&scanf=&charge=	https://kronos.stanford.edu/gfy/www/modules/show_out/show_out_wrapper.php?run_id=16838&search_id=21636&scans_id=16836&peptide_id=11616&scanf=16605&charge=4	http://kronos.stanford.edu/gfy/www/modules/sdig/index.php?run_id=16838&search_id=21636&scans_id=16836&peptide_id=11616&scanf=16605	http:/kronos.stanford.edu/gfy/www/modules/ascore/visual/trim-phos.php?run_id=16838&search_id=21636&scans_id=16836&peptide_id=11616&charge=4	653590	0.970921	0.0524811	0.624009	0.0530207	0.0779459	11.7691
Calmodulin-regulated spectrin-associated protein 1 OS=Mus musculus GN=Camsap1 PE=1 SV=1	tr|A0A0A0MQE5|A0A0A0MQE5_MOUSE	1407	S	VES|79.97|LEALPILSR	1	PSHRVES*LEALPI	1	37.23	2.1481	0.1712	0.3871	35.9	NO OTHERS:1	VES|79.97|LEALPILSR	1	0	0	1	VESLEALPILSR	ind_MOUSE.Tryp.TMT.REVUniprot20150423.CONTAM.fasta.hdr	21637	16835	49299	2	16837	21637	49299	16835	36903	2	16837	0.99	21637	49299	16835	36903	2	https://kronos.stanford.edu/cgi-bin/blast_html4?Db=/seq_db/static/ind_MOUSE.Tryp.TMT.REVUniprot20150423.CONTAM.fasta.hdr&Pep=VESLEALPILSR&MassType=0	https://kronos.stanford.edu/gfy/www/modules/show_out/show_out_wrapper.php?run_id=&search_id=&scans_id=&peptide_id=&scanf=&charge=	https://kronos.stanford.edu/gfy/www/modules/show_out/show_out_wrapper.php?run_id=16837&search_id=21637&scans_id=16835&peptide_id=49299&scanf=36903&charge=2	http://kronos.stanford.edu/gfy/www/modules/sdig/index.php?run_id=16837&search_id=21637&scans_id=16835&peptide_id=49299&scanf=36903	http:/kronos.stanford.edu/gfy/www/modules/ascore/visual/trim-phos.php?run_id=16837&search_id=21637&scans_id=16835&peptide_id=49299&charge=2	233881	0.984284	0.0748016	0.514386	0.0443588	0.107218	11.596
Filamin-B OS=Mus musculus GN=Flnb PE=1 SV=3	sp|Q80X90|FLNB_MOUSE	2481	S	LVSPGS|79.97|ANETSSILVESVTR	1	RLVSPGS*ANETSS	6	13.38	4.3184	0.0012	0.4987	71.83	NO OTHERS:6	LVSPGS|79.97|ANETSSILVESVTR	6	0	0	0	LVSPGSANETSSILVESVTR	ind_MOUSE.Tryp.TMT.REVUniprot20150423.CONTAM.fasta.hdr	21637	16835	45730	2		21638	53367	16834	39116	3		0.99	21637	45730	16835	38282	2	https://kronos.stanford.edu/cgi-bin/blast_html4?Db=/seq_db/static/ind_MOUSE.Tryp.TMT.REVUniprot20150423.CONTAM.fasta.hdr&Pep=LVSPGSANETSSILVESVTR&MassType=0	https://kronos.stanford.edu/gfy/www/modules/show_out/show_out_wrapper.php?run_id=&search_id=&scans_id=&peptide_id=&scanf=&charge=	https://kronos.stanford.edu/gfy/www/modules/show_out/show_out_wrapper.php?run_id=&search_id=21638&scans_id=16834&peptide_id=53367&scanf=39116&charge=3	http://kronos.stanford.edu/gfy/www/modules/sdig/index.php?run_id=&search_id=21638&scans_id=16834&peptide_id=53367&scanf=39116	http:/kronos.stanford.edu/gfy/www/modules/ascore/visual/trim-phos.php?run_id=&search_id=21637&scans_id=16835&peptide_id=45730&charge=2	3.69419e+06	0.834017	0.0287893	0.37962	0.0330992	0.107151	11.4691
Protein SON OS=Mus musculus GN=Son PE=1 SV=1	tr|H9KV00|H9KV00_MOUSE	1624	S	SLSS|79.97|QLALELDTVGTSK	1	IGRSLSS*QLALEL	1	9.82	2.4567	0.0302	0.2497	63.14	NO OTHERS:1	NONE > ascore = 13	1	0	0	6	SLSSQLALELDTVGTSK	ind_MOUSE.Tryp.TMT.REVUniprot20150423.CONTAM.fasta.hdr	21636	16836	48511	3	16838	21636	48511	16836	37119	3	16838	0.99	21636	48511	16836	37119	3	https://kronos.stanford.edu/cgi-bin/blast_html4?Db=/seq_db/static/ind_MOUSE.Tryp.TMT.REVUniprot20150423.CONTAM.fasta.hdr&Pep=SLSSQLALELDTVGTSK&MassType=0	https://kronos.stanford.edu/gfy/www/modules/show_out/show_out_wrapper.php?run_id=&search_id=&scans_id=&peptide_id=&scanf=&charge=	https://kronos.stanford.edu/gfy/www/modules/show_out/show_out_wrapper.php?run_id=16838&search_id=21636&scans_id=16836&peptide_id=48511&scanf=37119&charge=3	http://kronos.stanford.edu/gfy/www/modules/sdig/index.php?run_id=16838&search_id=21636&scans_id=16836&peptide_id=48511&scanf=37119	http:/kronos.stanford.edu/gfy/www/modules/ascore/visual/trim-phos.php?run_id=16838&search_id=21636&scans_id=16836&peptide_id=48511&charge=3	49264.1	0.993888	0.034097	0.612786	0.0562742	0.0560459	10.8893
Vimentin OS=Mus musculus GN=Vim PE=1 SV=1	tr|A0A0A6YWC8|A0A0A6YWC8_MOUSE	55	S	SLYSS|79.97|S|79.97|PGGAYVTR	1	SRSLYSS*SPGGAY	1	11.51	2.1327	0.0276	0.3732	40.36	2 days, 8:01:00	NONE > ascore = 13	0	1	0	2	SLYSSSPGGAYVTR	ind_MOUSE.Tryp.TMT.REVUniprot20150423.CONTAM.fasta.hdr	21638	16834	21685	2	16836	21638	21685	16834	22178	2	16836	0.99	21638	21685	16834	22178	2	https://kronos.stanford.edu/cgi-bin/blast_html4?Db=/seq_db/static/ind_MOUSE.Tryp.TMT.REVUniprot20150423.CONTAM.fasta.hdr&Pep=SLYSSSPGGAYVTR&MassType=0	https://kronos.stanford.edu/gfy/www/modules/show_out/show_out_wrapper.php?run_id=&search_id=&scans_id=&peptide_id=&scanf=&charge=	https://kronos.stanford.edu/gfy/www/modules/show_out/show_out_wrapper.php?run_id=16836&search_id=21638&scans_id=16834&peptide_id=21685&scanf=22178&charge=2	http://kronos.stanford.edu/gfy/www/modules/sdig/index.php?run_id=16836&search_id=21638&scans_id=16834&peptide_id=21685&scanf=22178	http:/kronos.stanford.edu/gfy/www/modules/ascore/visual/trim-phos.php?run_id=16836&search_id=21638&scans_id=16834&peptide_id=21685&charge=2	2.62195e+06	0.971881	0.0385871	0.650314	0.0601702	0.075764	10.8079
Annexin A1 OS=Mus musculus GN=Anxa1 PE=1 SV=2	sp|P10107|ANXA1_MOUSE	143	T	GLGTDEDTLIEILTT|79.97|RSNEQIR	1	LIEILTT*RSNEQI	2	0	4.3671	0.0279	0.385	55.24	NO OTHERS:2	NONE > ascore = 13	2	0	0	0	GLGTDEDTLIEILTTRSNEQIR	ind_MOUSE.Tryp.TMT.REVUniprot20150423.CONTAM.fasta.hdr	21638	16834	57976	3	16836	21638	57976	16834	41494	3	16836	0.99	21638	57976	16834	41494	3	https://kronos.stanford.edu/cgi-bin/blast_html4?Db=/seq_db/static/ind_MOUSE.Tryp.TMT.REVUniprot20150423.CONTAM.fasta.hdr&Pep=GLGTDEDTLIEILTTRSNEQIR&MassType=0	https://kronos.stanford.edu/gfy/www/modules/show_out/show_out_wrapper.php?run_id=&search_id=&scans_id=&peptide_id=&scanf=&charge=	https://kronos.stanford.edu/gfy/www/modules/show_out/show_out_wrapper.php?run_id=16836&search_id=21638&scans_id=16834&peptide_id=57976&scanf=41494&charge=3	http://kronos.stanford.edu/gfy/www/modules/sdig/index.php?run_id=16836&search_id=21638&scans_id=16834&peptide_id=57976&scanf=41494	http:/kronos.stanford.edu/gfy/www/modules/ascore/visual/trim-phos.php?run_id=16836&search_id=21638&scans_id=16834&peptide_id=57976&charge=3	826417	0.912752	0.0334725	0.447472	0.041503	0.0551605	10.7817
Nuclear receptor coactivator 5 OS=Mus musculus GN=Ncoa5 PE=1 SV=1	tr|B7ZC23|B7ZC23_MOUSE	244	S	LAPASTMAS|79.97|QRPVSSTGINFDNPSVQK	1	PASTMAS*QRPVSS	1	5.42	3.0264	0.0176	0.1797	43.01	NO OTHERS:1	NONE > ascore = 13	1	0	0	1	LAPASTMASQRPVSSTGINFDNPSVQK	ind_MOUSE.Tryp.TMT.REVUniprot20150423.CONTAM.fasta.hdr	21634	16839	22474	3	16841	21634	22474	16839	22179	3	16841	0.99	21634	22474	16839	22179	3	https://kronos.stanford.edu/cgi-bin/blast_html4?Db=/seq_db/static/ind_MOUSE.Tryp.TMT.REVUniprot20150423.CONTAM.fasta.hdr&Pep=LAPASTMASQRPVSSTGINFDNPSVQK&MassType=0	https://kronos.stanford.edu/gfy/www/modules/show_out/show_out_wrapper.php?run_id=&search_id=&scans_id=&peptide_id=&scanf=&charge=	https://kronos.stanford.edu/gfy/www/modules/show_out/show_out_wrapper.php?run_id=16841&search_id=21634&scans_id=16839&peptide_id=22474&scanf=22179&charge=3	http://kronos.stanford.edu/gfy/www/modules/sdig/index.php?run_id=16841&search_id=21634&scans_id=16839&peptide_id=22474&scanf=22179	http:/kronos.stanford.edu/gfy/www/modules/ascore/visual/trim-phos.php?run_id=16841&search_id=21634&scans_id=16839&peptide_id=22474&charge=3	790439	0.974982	0.0355634	0.478111	0.0449535	0.0876314	10.6357
Zinc finger SWIM domain-containing protein 8 OS=Mus musculus GN=Zswim8 PE=1 SV=1	sp|Q3UHH1|ZSWM8_MOUSE	1062	S	HGAPSAPGALQPLTSSS|79.97|AGPAQPGNVAGAGPGPTEGFTEK	1	QPLTSSS*AGPAQP	1	0	5.4474	0.0003	0.0599	67.34	NO OTHERS:1	NONE > ascore = 13	1	0	0	3	HGAPSAPGALQPLTSSSAGPAQPGNVAGAGPGPTEGFTEK	ind_MOUSE.Tryp.TMT.REVUniprot20150423.CONTAM.fasta.hdr	21634	16839	13687	3	16841	21634	13687	16839	17693	3	16841	0.99	21634	13687	16839	17693	3	https://kronos.stanford.edu/cgi-bin/blast_html4?Db=/seq_db/static/ind_MOUSE.Tryp.TMT.REVUniprot20150423.CONTAM.fasta.hdr&Pep=HGAPSAPGALQPLTSSSAGPAQPGNVAGAGPGPTEGFTEK&MassType=0	https://kronos.stanford.edu/gfy/www/modules/show_out/show_out_wrapper.php?run_id=&search_id=&scans_id=&peptide_id=&scanf=&charge=	https://kronos.stanford.edu/gfy/www/modules/show_out/show_out_wrapper.php?run_id=16841&search_id=21634&scans_id=16839&peptide_id=13687&scanf=17693&charge=3	http://kronos.stanford.edu/gfy/www/modules/sdig/index.php?run_id=16841&search_id=21634&scans_id=16839&peptide_id=13687&scanf=17693	http:/kronos.stanford.edu/gfy/www/modules/ascore/visual/trim-phos.php?run_id=16841&search_id=21634&scans_id=16839&peptide_id=13687&charge=3	115241	0.896673	0.0842051	0.395829	0.037421	0.0529912	10.5777
Septin-5 OS=Mus musculus GN=Sept5 PE=1 SV=2	sp|Q9Z2Q6|SEPT5_MOUSE	327	S	MES|79.97|PIPILPLPTPDAETEK	1	QDSRMES*PIPILP	13	87.51	4.2415	0.3644	0.5735	106.16	NO OTHERS:13	MES|79.97|PIPILPLPTPDAETEK	13	0	0	0	MESPIPILPLPTPDAETEK	ind_MOUSE.Tryp.TMT.REVUniprot20150423.CONTAM.fasta.hdr	21638	16834	55216	3	16836	21638	63237	16834	44296	3		0.99	21638	55216	16834	40069	3	https://kronos.stanford.edu/cgi-bin/blast_html4?Db=/seq_db/static/ind_MOUSE.Tryp.TMT.REVUniprot20150423.CONTAM.fasta.hdr&Pep=MESPIPILPLPTPDAETEK&MassType=0	https://kronos.stanford.edu/gfy/www/modules/show_out/show_out_wrapper.php?run_id=&search_id=&scans_id=&peptide_id=&scanf=&charge=	https://kronos.stanford.edu/gfy/www/modules/show_out/show_out_wrapper.php?run_id=&search_id=21638&scans_id=16834&peptide_id=63237&scanf=44296&charge=3	http://kronos.stanford.edu/gfy/www/modules/sdig/index.php?run_id=&search_id=21638&scans_id=16834&peptide_id=63237&scanf=44296	http:/kronos.stanford.edu/gfy/www/modules/ascore/visual/trim-phos.php?run_id=16836&search_id=21638&scans_id=16834&peptide_id=55216&charge=3	4.40885e+06	0.830763	0.0614834	0.347845	0.0337139	0.137848	10.3176
Nuclear pore complex protein Nup93 OS=Mus musculus GN=Nup93 PE=2 SV=1	sp|Q8BJ71|NUP93_MOUSE	66	S	ASVLLGS|79.97|R	1	ASVLLGS*RGLDIS	1	53.86	1.325	0.349	0.349	39.74	NO OTHERS:1	ASVLLGS|79.97|R	1	0	0	0	ASVLLGSR	ind_MOUSE.Tryp.TMT.REVUniprot20150423.CONTAM.fasta.hdr	21636	16836	10829	2	16838	21636	10829	16836	16145	2	16838	0.99	21636	10829	16836	16145	2	https://kronos.stanford.edu/cgi-bin/blast_html4?Db=/seq_db/static/ind_MOUSE.Tryp.TMT.REVUniprot20150423.CONTAM.fasta.hdr&Pep=ASVLLGSR&MassType=0	https://kronos.stanford.edu/gfy/www/modules/show_out/show_out_wrapper.php?run_id=&search_id=&scans_id=&peptide_id=&scanf=&charge=	https://kronos.stanford.edu/gfy/www/modules/show_out/show_out_wrapper.php?run_id=16838&search_id=21636&scans_id=16836&peptide_id=10829&scanf=16145&charge=2	http://kronos.stanford.edu/gfy/www/modules/sdig/index.php?run_id=16838&search_id=21636&scans_id=16836&peptide_id=10829&scanf=16145	http:/kronos.stanford.edu/gfy/www/modules/ascore/visual/trim-phos.php?run_id=16838&search_id=21636&scans_id=16836&peptide_id=10829&charge=2	987649	0.951562	0.0396016	0.478251	0.046862	0.039235	10.2055
Cullin-7 OS=Mus musculus GN=Cul7 PE=1 SV=2	sp|Q8VE73|CUL7_MOUSE	1499	S	AIGPLTSS|79.97|RGPLDLQEQK	1	IGPLTSS*RGPLDL	1	0	2.2548	0.0058	0.4901	31.74	NO OTHERS:1	NONE > ascore = 13	1	0	0	1	AIGPLTSSRGPLDLQEQK	ind_MOUSE.Tryp.TMT.REVUniprot20150423.CONTAM.fasta.hdr	21634	16839	22818	2	16841	21634	22818	16839	22354	2	16841	0.99	21634	22818	16839	22354	2	https://kronos.stanford.edu/cgi-bin/blast_html4?Db=/seq_db/static/ind_MOUSE.Tryp.TMT.REVUniprot20150423.CONTAM.fasta.hdr&Pep=AIGPLTSSRGPLDLQEQK&MassType=0	https://kronos.stanford.edu/gfy/www/modules/show_out/show_out_wrapper.php?run_id=&search_id=&scans_id=&peptide_id=&scanf=&charge=	https://kronos.stanford.edu/gfy/www/modules/show_out/show_out_wrapper.php?run_id=16841&search_id=21634&scans_id=16839&peptide_id=22818&scanf=22354&charge=2	http://kronos.stanford.edu/gfy/www/modules/sdig/index.php?run_id=16841&search_id=21634&scans_id=16839&peptide_id=22818&scanf=22354	http:/kronos.stanford.edu/gfy/www/modules/ascore/visual/trim-phos.php?run_id=16841&search_id=21634&scans_id=16839&peptide_id=22818&charge=2	361321	0.969199	0.0656589	0.454077	0.0469025	0.0581108	9.68131
Brain acid soluble protein 1 OS=Mus musculus GN=Basp1 PE=1 SV=3	sp|Q91XV3|BASP1_MOUSE	169	S	SDAAPAASDS|79.97|KPS|79.97|SAEPAPSSK	1	APAASDS*KPSSAE	2	2.64	2.1403	0.0174	0.3263	32.03	7 days, 4:02:00	NONE > ascore = 13	0	2	0	0	SDAAPAASDSKPSSAEPAPSSK	ind_MOUSE.Tryp.TMT.REVUniprot20150423.CONTAM.fasta.hdr	21638	16834	85561	3		21638	85561	16834	9651	3		0.99	21638	85561	16834	12163	3	https://kronos.stanford.edu/cgi-bin/blast_html4?Db=/seq_db/static/ind_MOUSE.Tryp.TMT.REVUniprot20150423.CONTAM.fasta.hdr&Pep=SDAAPAASDSKPSSAEPAPSSK&MassType=0	https://kronos.stanford.edu/gfy/www/modules/show_out/show_out_wrapper.php?run_id=&search_id=&scans_id=&peptide_id=&scanf=&charge=	https://kronos.stanford.edu/gfy/www/modules/show_out/show_out_wrapper.php?run_id=&search_id=21638&scans_id=16834&peptide_id=85561&scanf=9651&charge=3	http://kronos.stanford.edu/gfy/www/modules/sdig/index.php?run_id=&search_id=21638&scans_id=16834&peptide_id=85561&scanf=9651	http:/kronos.stanford.edu/gfy/www/modules/ascore/visual/trim-phos.php?run_id=&search_id=21638&scans_id=16834&peptide_id=85561&charge=3	1.59906e+06	0.884554	0.0409323	0.414018	0.0431895	0.0555025	9.58606
Neural cell adhesion molecule 1 OS=Mus musculus GN=Ncam1 PE=1 SV=1	tr|A0A0A6YY47|A0A0A6YY47_MOUSE	774	S	AAFSKDES|79.97|KEPIVEVR	1	AFSKDES*KEPIVE	1	38.37	2.7594	0.1954	0.2908	66.24	NO OTHERS:1	AAFSKDES|79.97|KEPIVEVR	1	0	0	4	AAFSKDESKEPIVEVR	ind_MOUSE.Tryp.TMT.REVUniprot20150423.CONTAM.fasta.hdr	21636	16836	10116	3	16838	21636	10116	16836	15721	3	16838	0.99	21636	10116	16836	15721	3	https://kronos.stanford.edu/cgi-bin/blast_html4?Db=/seq_db/static/ind_MOUSE.Tryp.TMT.REVUniprot20150423.CONTAM.fasta.hdr&Pep=AAFSKDESKEPIVEVR&MassType=0	https://kronos.stanford.edu/gfy/www/modules/show_out/show_out_wrapper.php?run_id=&search_id=&scans_id=&peptide_id=&scanf=&charge=	https://kronos.stanford.edu/gfy/www/modules/show_out/show_out_wrapper.php?run_id=16838&search_id=21636&scans_id=16836&peptide_id=10116&scanf=15721&charge=3	http://kronos.stanford.edu/gfy/www/modules/sdig/index.php?run_id=16838&search_id=21636&scans_id=16836&peptide_id=10116&scanf=15721	http:/kronos.stanford.edu/gfy/www/modules/ascore/visual/trim-phos.php?run_id=16838&search_id=21636&scans_id=16836&peptide_id=10116&charge=3	7.94102e+06	0.955793	0.0491106	0.599908	0.063276	0.104593	9.48081
Coatomer subunit gamma-1 OS=Mus musculus GN=Copg1 PE=2 SV=1	sp|Q9QZE5|COPG1_MOUSE	596	T	SVPLATTPMAEQRPESTAT|79.97|AAVK	1	RPESTAT*AAVKQP	1	13.27	2.4978	0.0042	0.3813	37.26	NO OTHERS:1	SVPLATTPMAEQRPESTAT|79.97|AAVK	1	0	0	0	SVPLATTPMAEQRPESTATAAVK	ind_MOUSE.Tryp.TMT.REVUniprot20150423.CONTAM.fasta.hdr	21636	16836	10144	2	16838	21636	10144	16836	15736	2	16838	0.99	21636	10144	16836	15736	2	https://kronos.stanford.edu/cgi-bin/blast_html4?Db=/seq_db/static/ind_MOUSE.Tryp.TMT.REVUniprot20150423.CONTAM.fasta.hdr&Pep=SVPLATTPMAEQRPESTATAAVK&MassType=0	https://kronos.stanford.edu/gfy/www/modules/show_out/show_out_wrapper.php?run_id=&search_id=&scans_id=&peptide_id=&scanf=&charge=	https://kronos.stanford.edu/gfy/www/modules/show_out/show_out_wrapper.php?run_id=16838&search_id=21636&scans_id=16836&peptide_id=10144&scanf=15736&charge=2	http://kronos.stanford.edu/gfy/www/modules/sdig/index.php?run_id=16838&search_id=21636&scans_id=16836&peptide_id=10144&scanf=15736	http:/kronos.stanford.edu/gfy/www/modules/ascore/visual/trim-phos.php?run_id=16838&search_id=21636&scans_id=16836&peptide_id=10144&charge=2	141758	0.987841	0.0513558	0.480063	0.0508335	0.0957941	9.44383
Filamin, alpha OS=Mus musculus GN=Flna PE=1 SV=1	tr|B7FAU9|B7FAU9_MOUSE	189	S	LPQLPITNFS|79.97|R	1	LPITNFS*RDWQSG	1	7.04	1.7811	0.1749	0.38	32.9	NO OTHERS:1	NONE > ascore = 13	1	0	0	3	LPQLPITNFSR	ind_MOUSE.Tryp.TMT.REVUniprot20150423.CONTAM.fasta.hdr	21634	16839	41359	2	16841	21634	41359	16839	32593	2	16841	0.99	21634	41359	16839	32593	2	https://kronos.stanford.edu/cgi-bin/blast_html4?Db=/seq_db/static/ind_MOUSE.Tryp.TMT.REVUniprot20150423.CONTAM.fasta.hdr&Pep=LPQLPITNFSR&MassType=0	https://kronos.stanford.edu/gfy/www/modules/show_out/show_out_wrapper.php?run_id=&search_id=&scans_id=&peptide_id=&scanf=&charge=	https://kronos.stanford.edu/gfy/www/modules/show_out/show_out_wrapper.php?run_id=16841&search_id=21634&scans_id=16839&peptide_id=41359&scanf=32593&charge=2	http://kronos.stanford.edu/gfy/www/modules/sdig/index.php?run_id=16841&search_id=21634&scans_id=16839&peptide_id=41359&scanf=32593	http:/kronos.stanford.edu/gfy/www/modules/ascore/visual/trim-phos.php?run_id=16841&search_id=21634&scans_id=16839&peptide_id=41359&charge=2	648944	0.965098	0.0461732	0.46135	0.0498604	0.0565875	9.25285
DCP1 decapping enzyme homolog b (S. cerevisiae) OS=Mus musculus GN=Dcp1b PE=2 SV=1	tr|B9EIX0|B9EIX0_MOUSE	203	S	LIKPVPVRPS|79.97|SSQR	1	PVPVRPS*SSQRLQ	1	0	2.0593	0.0054	0.338	28.62	NO OTHERS:1	NONE > ascore = 13	1	0	0	2	LIKPVPVRPSSSQR	ind_MOUSE.Tryp.TMT.REVUniprot20150423.CONTAM.fasta.hdr	21635	16837	2590	3	16839	21635	2590	16837	11568	3	16839	0.99	21635	2590	16837	11568	3	https://kronos.stanford.edu/cgi-bin/blast_html4?Db=/seq_db/static/ind_MOUSE.Tryp.TMT.REVUniprot20150423.CONTAM.fasta.hdr&Pep=LIKPVPVRPSSSQR&MassType=0	https://kronos.stanford.edu/gfy/www/modules/show_out/show_out_wrapper.php?run_id=&search_id=&scans_id=&peptide_id=&scanf=&charge=	https://kronos.stanford.edu/gfy/www/modules/show_out/show_out_wrapper.php?run_id=16839&search_id=21635&scans_id=16837&peptide_id=2590&scanf=11568&charge=3	http://kronos.stanford.edu/gfy/www/modules/sdig/index.php?run_id=16839&search_id=21635&scans_id=16837&peptide_id=2590&scanf=11568	http:/kronos.stanford.edu/gfy/www/modules/ascore/visual/trim-phos.php?run_id=16839&search_id=21635&scans_id=16837&peptide_id=2590&charge=3	166777	0.932558	0.147309	0.524614	0.0576538	0.079474	9.09938
Cytospin-B OS=Mus musculus GN=Specc1 PE=1 SV=2	sp|Q5SXY1|CYTSB_MOUSE	810	S	GVYVNRTS|79.97|PAPSDSATTVK	1	VYVNRTS*PAPSDS	2	0	2.9766	0.0059	0.2514	60.97	NO OTHERS:2	NONE > ascore = 13	2	0	0	1	GVYVNRTSPAPSDSATTVK	ind_MOUSE.Tryp.TMT.REVUniprot20150423.CONTAM.fasta.hdr	21637	16835	2512	3	16837	21637	2512	16835	11235	3	16837	0.99	21637	2512	16835	11235	3	https://kronos.stanford.edu/cgi-bin/blast_html4?Db=/seq_db/static/ind_MOUSE.Tryp.TMT.REVUniprot20150423.CONTAM.fasta.hdr&Pep=GVYVNRTSPAPSDSATTVK&MassType=0	https://kronos.stanford.edu/gfy/www/modules/show_out/show_out_wrapper.php?run_id=&search_id=&scans_id=&peptide_id=&scanf=&charge=	https://kronos.stanford.edu/gfy/www/modules/show_out/show_out_wrapper.php?run_id=16837&search_id=21637&scans_id=16835&peptide_id=2512&scanf=11235&charge=3	http://kronos.stanford.edu/gfy/www/modules/sdig/index.php?run_id=16837&search_id=21637&scans_id=16835&peptide_id=2512&scanf=11235	http:/kronos.stanford.edu/gfy/www/modules/ascore/visual/trim-phos.php?run_id=16837&search_id=21637&scans_id=16835&peptide_id=2512&charge=3	5.80087e+06	0.980547	0.0534661	0.45863	0.0504672	0.101819	9.08769
26S proteasome non-ATPase regulatory subunit 9 OS=Mus musculus GN=Psmd9 PE=1 SV=1	sp|Q9CR00|PSMD9_MOUSE	126	S	RLAS|79.97|NS|79.97|PVLPQAFAR	1	MNRRLAS*NSPVLP	5	1000	2.6534	0.3539	0.3539	41.49	NO OTHERS:1; 128:4	LAS|79.97|NSPVLPQAFAR, LAS|79.97|NS|79.97|PVLPQAFAR, RLAS|79.97|NS|79.97|PVLPQAFAR	1	4	0	0	RLASNSPVLPQAFAR	ind_MOUSE.Tryp.TMT.REVUniprot20150423.CONTAM.fasta.hdr	21637	16835	26315	3	16837	21637	26315	16835	24561	3	16837	0.99	21637	26315	16835	24561	3	https://kronos.stanford.edu/cgi-bin/blast_html4?Db=/seq_db/static/ind_MOUSE.Tryp.TMT.REVUniprot20150423.CONTAM.fasta.hdr&Pep=RLASNSPVLPQAFAR&MassType=0	https://kronos.stanford.edu/gfy/www/modules/show_out/show_out_wrapper.php?run_id=&search_id=&scans_id=&peptide_id=&scanf=&charge=	https://kronos.stanford.edu/gfy/www/modules/show_out/show_out_wrapper.php?run_id=16837&search_id=21637&scans_id=16835&peptide_id=26315&scanf=24561&charge=3	http://kronos.stanford.edu/gfy/www/modules/sdig/index.php?run_id=16837&search_id=21637&scans_id=16835&peptide_id=26315&scanf=24561	http:/kronos.stanford.edu/gfy/www/modules/ascore/visual/trim-phos.php?run_id=16837&search_id=21637&scans_id=16835&peptide_id=26315&charge=3	944909	0.937404	0.0486654	0.444485	0.0495334	0.183347	8.97344
26S proteasome non-ATPase regulatory subunit 9 OS=Mus musculus GN=Psmd9 PE=1 SV=1	sp|Q9CR00|PSMD9_MOUSE	128	S	RLAS|79.97|NS|79.97|PVLPQAFAR	2	RRLASNS*PVLPQA	7	1000	2.6534	0.3539	0.3539	45.6	NO OTHERS:3; 126:4	LASNS|79.97|PVLPQAFAR, LAS|79.97|NS|79.97|PVLPQAFAR, RLAS|79.97|NS|79.97|PVLPQAFAR	3	4	0	0	RLASNSPVLPQAFAR	ind_MOUSE.Tryp.TMT.REVUniprot20150423.CONTAM.fasta.hdr	21637	16835	26315	3	16837	21637	26315	16835	24561	3	16837	0.99	21634	25047	16839	27743	2	https://kronos.stanford.edu/cgi-bin/blast_html4?Db=/seq_db/static/ind_MOUSE.Tryp.TMT.REVUniprot20150423.CONTAM.fasta.hdr&Pep=RLASNSPVLPQAFAR&MassType=0	https://kronos.stanford.edu/gfy/www/modules/show_out/show_out_wrapper.php?run_id=&search_id=&scans_id=&peptide_id=&scanf=&charge=	https://kronos.stanford.edu/gfy/www/modules/show_out/show_out_wrapper.php?run_id=16837&search_id=21637&scans_id=16835&peptide_id=26315&scanf=24561&charge=3	http://kronos.stanford.edu/gfy/www/modules/sdig/index.php?run_id=16837&search_id=21637&scans_id=16835&peptide_id=26315&scanf=24561	http:/kronos.stanford.edu/gfy/www/modules/ascore/visual/trim-phos.php?run_id=16837&search_id=21637&scans_id=16835&peptide_id=26315&charge=3	944909	0.937404	0.0486654	0.444485	0.0495334	0.183347	8.97344
Vimentin OS=Mus musculus GN=Vim PE=1 SV=1	tr|A0A0A6YWC8|A0A0A6YWC8_MOUSE	48	T	TYSLGSALRPST|79.97|SR	1	SALRPST*SRSLYS	1	0	1.9152	0.0481	0.2632	29.08	NO OTHERS:1	NONE > ascore = 13	1	0	0	2	TYSLGSALRPSTSR	ind_MOUSE.Tryp.TMT.REVUniprot20150423.CONTAM.fasta.hdr	21636	16836	6784	3	16838	21636	6784	16836	13759	3	16838	0.99	21636	6784	16836	13759	3	https://kronos.stanford.edu/cgi-bin/blast_html4?Db=/seq_db/static/ind_MOUSE.Tryp.TMT.REVUniprot20150423.CONTAM.fasta.hdr&Pep=TYSLGSALRPSTSR&MassType=0	https://kronos.stanford.edu/gfy/www/modules/show_out/show_out_wrapper.php?run_id=&search_id=&scans_id=&peptide_id=&scanf=&charge=	https://kronos.stanford.edu/gfy/www/modules/show_out/show_out_wrapper.php?run_id=16838&search_id=21636&scans_id=16836&peptide_id=6784&scanf=13759&charge=3	http://kronos.stanford.edu/gfy/www/modules/sdig/index.php?run_id=16838&search_id=21636&scans_id=16836&peptide_id=6784&scanf=13759	http:/kronos.stanford.edu/gfy/www/modules/ascore/visual/trim-phos.php?run_id=16838&search_id=21636&scans_id=16836&peptide_id=6784&charge=3	482365	0.996457	0.0560201	0.541991	0.0610392	0.0810438	8.87939
Cleavage stimulation factor subunit 2 tau variant OS=Mus musculus GN=Cstf2t PE=1 SV=2	sp|Q8C7E9|CSTFT_MOUSE	470	S	GPGPS|79.97|SRGPMTGGIQGPGPINMGAGGPQGPR	1	MRGPGPS*SRGPMT	1	0	4.4026	0.0408	0.5629	51.09	NO OTHERS:1	NONE > ascore = 13	1	0	0	0	GPGPSSRGPMTGGIQGPGPINMGAGGPQGPR	ind_MOUSE.Tryp.TMT.REVUniprot20150423.CONTAM.fasta.hdr	21634	16839	11881	3	16841	21634	11881	16839	16567	3	16841	0.99	21634	11881	16839	16567	3	https://kronos.stanford.edu/cgi-bin/blast_html4?Db=/seq_db/static/ind_MOUSE.Tryp.TMT.REVUniprot20150423.CONTAM.fasta.hdr&Pep=GPGPSSRGPMTGGIQGPGPINMGAGGPQGPR&MassType=0	https://kronos.stanford.edu/gfy/www/modules/show_out/show_out_wrapper.php?run_id=&search_id=&scans_id=&peptide_id=&scanf=&charge=	https://kronos.stanford.edu/gfy/www/modules/show_out/show_out_wrapper.php?run_id=16841&search_id=21634&scans_id=16839&peptide_id=11881&scanf=16567&charge=3	http://kronos.stanford.edu/gfy/www/modules/sdig/index.php?run_id=16841&search_id=21634&scans_id=16839&peptide_id=11881&scanf=16567	http:/kronos.stanford.edu/gfy/www/modules/ascore/visual/trim-phos.php?run_id=16841&search_id=21634&scans_id=16839&peptide_id=11881&charge=3	561435	0.991445	0.0603169	0.567274	0.0645349	0.0732888	8.79018
BAG family molecular chaperone regulator 3 OS=Mus musculus GN=Bag3 PE=1 SV=2	sp|Q9JLV1|BAG3_MOUSE	404	S	AAPS|79.97|PAPAEPAAPK	1	EQKAAPS*PAPAEP	4	1000	2.4201	0.5909	0.5909	77.68	NO OTHERS:4	AAPS|79.97|PAPAEPAAPK	4	0	0	0	AAPSPAPAEPAAPK	ind_MOUSE.Tryp.TMT.REVUniprot20150423.CONTAM.fasta.hdr	21638	16834	2831	2	16836	21638	2831	16834	11404	2	16836	0.99	21638	2831	16834	11404	2	https://kronos.stanford.edu/cgi-bin/blast_html4?Db=/seq_db/static/ind_MOUSE.Tryp.TMT.REVUniprot20150423.CONTAM.fasta.hdr&Pep=AAPSPAPAEPAAPK&MassType=0	https://kronos.stanford.edu/gfy/www/modules/show_out/show_out_wrapper.php?run_id=&search_id=&scans_id=&peptide_id=&scanf=&charge=	https://kronos.stanford.edu/gfy/www/modules/show_out/show_out_wrapper.php?run_id=16836&search_id=21638&scans_id=16834&peptide_id=2831&scanf=11404&charge=2	http://kronos.stanford.edu/gfy/www/modules/sdig/index.php?run_id=16836&search_id=21638&scans_id=16834&peptide_id=2831&scanf=11404	http:/kronos.stanford.edu/gfy/www/modules/ascore/visual/trim-phos.php?run_id=16836&search_id=21638&scans_id=16834&peptide_id=2831&charge=2	1.02563e+07	0.985686	0.038053	0.510237	0.0585601	0.0577879	8.71304
Eukaryotic translation initiation factor 3 subunit B OS=Mus musculus GN=Eif3b PE=1 SV=1	sp|Q8JZQ9|EIF3B_MOUSE	90	S	SPS|79.97|QEPSAPGKAEAVGEQAR	1	SAERSPS*QEPSAP	2	11.53	3.148	0.0281	0.3598	60.13	NO OTHERS:2	NONE > ascore = 13	2	0	0	0	SPSQEPSAPGKAEAVGEQAR	ind_MOUSE.Tryp.TMT.REVUniprot20150423.CONTAM.fasta.hdr	21639	16833	3992	3	16835	21638	84785	16834	9216	3		0.99	21638	84785	16834	11892	3	https://kronos.stanford.edu/cgi-bin/blast_html4?Db=/seq_db/static/ind_MOUSE.Tryp.TMT.REVUniprot20150423.CONTAM.fasta.hdr&Pep=SPSQEPSAPGKAEAVGEQAR&MassType=0	https://kronos.stanford.edu/gfy/www/modules/show_out/show_out_wrapper.php?run_id=&search_id=&scans_id=&peptide_id=&scanf=&charge=	https://kronos.stanford.edu/gfy/www/modules/show_out/show_out_wrapper.php?run_id=&search_id=21638&scans_id=16834&peptide_id=84785&scanf=9216&charge=3	http://kronos.stanford.edu/gfy/www/modules/sdig/index.php?run_id=&search_id=21638&scans_id=16834&peptide_id=84785&scanf=9216	http:/kronos.stanford.edu/gfy/www/modules/ascore/visual/trim-phos.php?run_id=16835&search_id=21639&scans_id=16833&peptide_id=3992&charge=3	6.79152e+06	0.639039	0.0367794	0.307129	0.0354256	0.29543	8.66968
Uncharacterized protein C6orf226 homolog OS=Mus musculus PE=4 SV=1	sp|Q9D727|CF226_MOUSE	15	S	GGVSS|79.97|PSGALASAEPAPASVTLAELLHLVQK	1	QRGGVSS*PSGALA	1	11.35	5.2416	0.0005	0.5096	68.14	NO OTHERS:1	NONE > ascore = 13	1	0	0	0	GGVSSPSGALASAEPAPASVTLAELLHLVQK	ind_MOUSE.Tryp.TMT.REVUniprot20150423.CONTAM.fasta.hdr	21634	16839	66259	3	16841	21634	66259	16839	47341	3	16841	0.99	21634	66259	16839	47341	3	https://kronos.stanford.edu/cgi-bin/blast_html4?Db=/seq_db/static/ind_MOUSE.Tryp.TMT.REVUniprot20150423.CONTAM.fasta.hdr&Pep=GGVSSPSGALASAEPAPASVTLAELLHLVQK&MassType=0	https://kronos.stanford.edu/gfy/www/modules/show_out/show_out_wrapper.php?run_id=&search_id=&scans_id=&peptide_id=&scanf=&charge=	https://kronos.stanford.edu/gfy/www/modules/show_out/show_out_wrapper.php?run_id=16841&search_id=21634&scans_id=16839&peptide_id=66259&scanf=47341&charge=3	http://kronos.stanford.edu/gfy/www/modules/sdig/index.php?run_id=16841&search_id=21634&scans_id=16839&peptide_id=66259&scanf=47341	http:/kronos.stanford.edu/gfy/www/modules/ascore/visual/trim-phos.php?run_id=16841&search_id=21634&scans_id=16839&peptide_id=66259&charge=3	1.08838e+06	0.998665	0.0846488	0.494749	0.057575	0.067399	8.59311
Protein Ahnak OS=Mus musculus GN=Ahnak PE=1 SV=1	tr|E9Q616|E9Q616_MOUSE	5228	S	GPQIS|79.97|APSMDFNLEGPK	1	LKGPQIS*APSMDF	4	26.79	2.7402	0.0158	0.0229	61.97	NO OTHERS:4	GPQIS|79.97|APSMDFNLEGPK	4	0	0	0	GPQISAPSMDFNLEGPK	ind_MOUSE.Tryp.TMT.REVUniprot20150423.CONTAM.fasta.hdr	21634	16839	34239	2		21634	52010	16839	38775	4	16841	0.99	21634	34239	16839	33123	2	https://kronos.stanford.edu/cgi-bin/blast_html4?Db=/seq_db/static/ind_MOUSE.Tryp.TMT.REVUniprot20150423.CONTAM.fasta.hdr&Pep=GPQISAPSMDFNLEGPK&MassType=0	https://kronos.stanford.edu/gfy/www/modules/show_out/show_out_wrapper.php?run_id=&search_id=&scans_id=&peptide_id=&scanf=&charge=	https://kronos.stanford.edu/gfy/www/modules/show_out/show_out_wrapper.php?run_id=16841&search_id=21634&scans_id=16839&peptide_id=52010&scanf=38775&charge=4	http://kronos.stanford.edu/gfy/www/modules/sdig/index.php?run_id=16841&search_id=21634&scans_id=16839&peptide_id=52010&scanf=38775	http:/kronos.stanford.edu/gfy/www/modules/ascore/visual/trim-phos.php?run_id=&search_id=21634&scans_id=16839&peptide_id=34239&charge=2	1.37839e+06	0.979174	0.078906	0.537413	0.0628699	0.0895775	8.54802
E3 SUMO-protein ligase RanBP2 OS=Mus musculus GN=Ranbp2 PE=1 SV=2	sp|Q9ERU9|RBP2_MOUSE	1438	S	S|79.97|ASSFVQTSFK	1	ACQNTKS*ASSFVQ	2	32.4	2.3356	0.1644	0.4444	82.6	NO OTHERS:2	S|79.97|ASSFVQTSFK	2	0	0	0	SASSFVQTSFK	ind_MOUSE.Tryp.TMT.REVUniprot20150423.CONTAM.fasta.hdr	21634	16839	20494	2	16841	21634	20494	16839	21149	2	16841	0.99	21634	20494	16839	21149	2	https://kronos.stanford.edu/cgi-bin/blast_html4?Db=/seq_db/static/ind_MOUSE.Tryp.TMT.REVUniprot20150423.CONTAM.fasta.hdr&Pep=SASSFVQTSFK&MassType=0	https://kronos.stanford.edu/gfy/www/modules/show_out/show_out_wrapper.php?run_id=&search_id=&scans_id=&peptide_id=&scanf=&charge=	https://kronos.stanford.edu/gfy/www/modules/show_out/show_out_wrapper.php?run_id=16841&search_id=21634&scans_id=16839&peptide_id=20494&scanf=21149&charge=2	http://kronos.stanford.edu/gfy/www/modules/sdig/index.php?run_id=16841&search_id=21634&scans_id=16839&peptide_id=20494&scanf=21149	http:/kronos.stanford.edu/gfy/www/modules/ascore/visual/trim-phos.php?run_id=16841&search_id=21634&scans_id=16839&peptide_id=20494&charge=2	1.50992e+06	0.986529	0.0783807	0.536852	0.0642916	0.0693759	8.35027
Ras GTPase-activating protein-binding protein 1 OS=Mus musculus GN=G3bp1 PE=1 SV=1	sp|P97855|G3BP1_MOUSE	284	S	VPASQPRPES|79.97|KPDSQIPPQRPQR	1	SQPRPES*KPDSQI	1	25.38	3.2006	0.0067	0.2796	23.58	NO OTHERS:1	VPASQPRPES|79.97|KPDSQIPPQRPQR	1	0	0	0	VPASQPRPESKPDSQIPPQRPQR	ind_MOUSE.Tryp.TMT.REVUniprot20150423.CONTAM.fasta.hdr	21636	16836	75545	4	16838	21636	75545	16836	6948	4	16838	0.99	21636	75545	16836	6948	4	https://kronos.stanford.edu/cgi-bin/blast_html4?Db=/seq_db/static/ind_MOUSE.Tryp.TMT.REVUniprot20150423.CONTAM.fasta.hdr&Pep=VPASQPRPESKPDSQIPPQRPQR&MassType=0	https://kronos.stanford.edu/gfy/www/modules/show_out/show_out_wrapper.php?run_id=&search_id=&scans_id=&peptide_id=&scanf=&charge=	https://kronos.stanford.edu/gfy/www/modules/show_out/show_out_wrapper.php?run_id=16838&search_id=21636&scans_id=16836&peptide_id=75545&scanf=6948&charge=4	http://kronos.stanford.edu/gfy/www/modules/sdig/index.php?run_id=16838&search_id=21636&scans_id=16836&peptide_id=75545&scanf=6948	http:/kronos.stanford.edu/gfy/www/modules/ascore/visual/trim-phos.php?run_id=16838&search_id=21636&scans_id=16836&peptide_id=75545&charge=4	1.20198e+06	0.967901	0.111273	0.495911	0.0599274	0.0872846	8.27519
Centrosomal protein of 170 kDa protein B OS=Mus musculus GN=Cep170b PE=1 SV=2	sp|Q80U49|C170B_MOUSE	1514	S	APS|79.97|GSGQPGLGK	1	MGNRAPS*GSGQPG	1	30.7	2.0556	0.0394	0.5174	60.76	NO OTHERS:1	APS|79.97|GSGQPGLGK	1	0	0	1	APSGSGQPGLGK	ind_MOUSE.Tryp.TMT.REVUniprot20150423.CONTAM.fasta.hdr	21636	16836	80227	2	16838	21636	80227	16836	9655	2	16838	0.99	21636	80227	16836	9655	2	https://kronos.stanford.edu/cgi-bin/blast_html4?Db=/seq_db/static/ind_MOUSE.Tryp.TMT.REVUniprot20150423.CONTAM.fasta.hdr&Pep=APSGSGQPGLGK&MassType=0	https://kronos.stanford.edu/gfy/www/modules/show_out/show_out_wrapper.php?run_id=&search_id=&scans_id=&peptide_id=&scanf=&charge=	https://kronos.stanford.edu/gfy/www/modules/show_out/show_out_wrapper.php?run_id=16838&search_id=21636&scans_id=16836&peptide_id=80227&scanf=9655&charge=2	http://kronos.stanford.edu/gfy/www/modules/sdig/index.php?run_id=16838&search_id=21636&scans_id=16836&peptide_id=80227&scanf=9655	http:/kronos.stanford.edu/gfy/www/modules/ascore/visual/trim-phos.php?run_id=16838&search_id=21636&scans_id=16836&peptide_id=80227&charge=2	2.57694e+06	0.959781	0.0634792	0.614794	0.0745494	0.0692636	8.24681
SUZ domain-containing protein 1 (Fragment) OS=Mus musculus GN=Szrd1 PE=1 SV=1	tr|A2AA85|A2AA85_MOUSE	62	S	RPTS|79.97|NGVVSSPNSTSRPALPVK	1	ILKRPTS*NGVVSS	1	11.65	2.9067	0.0333	0.2286	45.03	NO OTHERS:1	NONE > ascore = 13	1	0	0	2	RPTSNGVVSSPNSTSRPALPVK	ind_MOUSE.Tryp.TMT.REVUniprot20150423.CONTAM.fasta.hdr	21634	16839	2908	3	16841	21634	2908	16839	11452	3	16841	0.99	21634	2908	16839	11452	3	https://kronos.stanford.edu/cgi-bin/blast_html4?Db=/seq_db/static/ind_MOUSE.Tryp.TMT.REVUniprot20150423.CONTAM.fasta.hdr&Pep=RPTSNGVVSSPNSTSRPALPVK&MassType=0	https://kronos.stanford.edu/gfy/www/modules/show_out/show_out_wrapper.php?run_id=&search_id=&scans_id=&peptide_id=&scanf=&charge=	https://kronos.stanford.edu/gfy/www/modules/show_out/show_out_wrapper.php?run_id=16841&search_id=21634&scans_id=16839&peptide_id=2908&scanf=11452&charge=3	http://kronos.stanford.edu/gfy/www/modules/sdig/index.php?run_id=16841&search_id=21634&scans_id=16839&peptide_id=2908&scanf=11452	http:/kronos.stanford.edu/gfy/www/modules/ascore/visual/trim-phos.php?run_id=16841&search_id=21634&scans_id=16839&peptide_id=2908&charge=3	478748	0.99809	0.0727241	0.483439	0.058779	0.0800605	8.22469
Nuclear receptor coactivator 5 OS=Mus musculus GN=Ncoa5 PE=1 SV=1	tr|B7ZC23|B7ZC23_MOUSE	251	T	LAPASTMASQRPVSST|79.97|GINFDNPSVQK	1	QRPVSST*GINFDN	1	0	3.6523	0.0101	0.2043	46.04	NO OTHERS:1	NONE > ascore = 13	1	0	0	1	LAPASTMASQRPVSSTGINFDNPSVQK	ind_MOUSE.Tryp.TMT.REVUniprot20150423.CONTAM.fasta.hdr	21634	16839	22814	4	16841	21634	22814	16839	22352	4	16841	0.99	21634	22814	16839	22352	4	https://kronos.stanford.edu/cgi-bin/blast_html4?Db=/seq_db/static/ind_MOUSE.Tryp.TMT.REVUniprot20150423.CONTAM.fasta.hdr&Pep=LAPASTMASQRPVSSTGINFDNPSVQK&MassType=0	https://kronos.stanford.edu/gfy/www/modules/show_out/show_out_wrapper.php?run_id=&search_id=&scans_id=&peptide_id=&scanf=&charge=	https://kronos.stanford.edu/gfy/www/modules/show_out/show_out_wrapper.php?run_id=16841&search_id=21634&scans_id=16839&peptide_id=22814&scanf=22352&charge=4	http://kronos.stanford.edu/gfy/www/modules/sdig/index.php?run_id=16841&search_id=21634&scans_id=16839&peptide_id=22814&scanf=22352	http:/kronos.stanford.edu/gfy/www/modules/ascore/visual/trim-phos.php?run_id=16841&search_id=21634&scans_id=16839&peptide_id=22814&charge=4	649850	0.966849	0.0532399	0.439581	0.0542864	0.108295	8.09745
SEC23-interacting protein OS=Mus musculus GN=Sec23ip PE=4 SV=1	tr|G3X928|G3X928_MOUSE	600	S	S|79.97|PGSVAVSNGVIK	1	DMCVSKS*PGSVAV	12	48.59	3.1253	0.2149	0.547	137.44	NO OTHERS:12	S|79.97|PGSVAVSNGVIK	12	0	0	1	SPGSVAVSNGVIK	ind_MOUSE.Tryp.TMT.REVUniprot20150423.CONTAM.fasta.hdr	21637	16835	18737	2		21637	18737	16835	20500	2		0.99	21637	18737	16835	20768	2	https://kronos.stanford.edu/cgi-bin/blast_html4?Db=/seq_db/static/ind_MOUSE.Tryp.TMT.REVUniprot20150423.CONTAM.fasta.hdr&Pep=SPGSVAVSNGVIK&MassType=0	https://kronos.stanford.edu/gfy/www/modules/show_out/show_out_wrapper.php?run_id=&search_id=&scans_id=&peptide_id=&scanf=&charge=	https://kronos.stanford.edu/gfy/www/modules/show_out/show_out_wrapper.php?run_id=&search_id=21637&scans_id=16835&peptide_id=18737&scanf=20500&charge=2	http://kronos.stanford.edu/gfy/www/modules/sdig/index.php?run_id=&search_id=21637&scans_id=16835&peptide_id=18737&scanf=20500	http:/kronos.stanford.edu/gfy/www/modules/ascore/visual/trim-phos.php?run_id=&search_id=21637&scans_id=16835&peptide_id=18737&charge=2	1.89726e+07	0.986756	0.0577613	0.565367	0.0701197	0.0763525	8.06289
Filamin, alpha OS=Mus musculus GN=Flna PE=1 SV=1	tr|B7FAU9|B7FAU9_MOUSE	1055	S	EEGPYEVEVTYDGVPVPGS|79.97|PFPLEAVAPTKPSK	1	GVPVPGS*PFPLEA	1	3.7	3.8229	0.1083	0.4778	43.75	NO OTHERS:1	NONE > ascore = 13	1	0	0	2	EEGPYEVEVTYDGVPVPGSPFPLEAVAPTKPSK	ind_MOUSE.Tryp.TMT.REVUniprot20150423.CONTAM.fasta.hdr	21636	16836	48750	3	16838	21636	48750	16836	37243	3	16838	0.99	21636	48750	16836	37243	3	https://kronos.stanford.edu/cgi-bin/blast_html4?Db=/seq_db/static/ind_MOUSE.Tryp.TMT.REVUniprot20150423.CONTAM.fasta.hdr&Pep=EEGPYEVEVTYDGVPVPGSPFPLEAVAPTKPSK&MassType=0	https://kronos.stanford.edu/gfy/www/modules/show_out/show_out_wrapper.php?run_id=&search_id=&scans_id=&peptide_id=&scanf=&charge=	https://kronos.stanford.edu/gfy/www/modules/show_out/show_out_wrapper.php?run_id=16838&search_id=21636&scans_id=16836&peptide_id=48750&scanf=37243&charge=3	http://kronos.stanford.edu/gfy/www/modules/sdig/index.php?run_id=16838&search_id=21636&scans_id=16836&peptide_id=48750&scanf=37243	http:/kronos.stanford.edu/gfy/www/modules/ascore/visual/trim-phos.php?run_id=16838&search_id=21636&scans_id=16836&peptide_id=48750&charge=3	58843.1	0.982157	0.0772406	0.506237	0.0629249	0.107283	8.04509
Elongation factor 1-delta (Fragment) OS=Mus musculus GN=Eef1d PE=1 SV=4	tr|D3YUQ9|D3YUQ9_MOUSE	119	S	LSSLEKSS|79.97|PTPR	1	SSLEKSS*PTPRAT	2	13.27	2.2275	0.0473	0.4491	58.66	NO OTHERS:2	LSSLEKSS|79.97|PTPR	2	0	0	9	LSSLEKSSPTPR	ind_MOUSE.Tryp.TMT.REVUniprot20150423.CONTAM.fasta.hdr	21635	16837	428	2	16839	21634	2459	16839	11220	2		0.99	21634	2459	16839	10186	2	https://kronos.stanford.edu/cgi-bin/blast_html4?Db=/seq_db/static/ind_MOUSE.Tryp.TMT.REVUniprot20150423.CONTAM.fasta.hdr&Pep=LSSLEKSSPTPR&MassType=0	https://kronos.stanford.edu/gfy/www/modules/show_out/show_out_wrapper.php?run_id=&search_id=&scans_id=&peptide_id=&scanf=&charge=	https://kronos.stanford.edu/gfy/www/modules/show_out/show_out_wrapper.php?run_id=&search_id=21634&scans_id=16839&peptide_id=2459&scanf=11220&charge=2	http://kronos.stanford.edu/gfy/www/modules/sdig/index.php?run_id=&search_id=21634&scans_id=16839&peptide_id=2459&scanf=11220	http:/kronos.stanford.edu/gfy/www/modules/ascore/visual/trim-phos.php?run_id=16839&search_id=21635&scans_id=16837&peptide_id=428&charge=2	9.40902e+06	0.922044	0.0704443	0.396133	0.0498843	0.0668006	7.94104
Insulin-like growth factor 2 mRNA-binding protein 2 OS=Mus musculus GN=Igf2bp2 PE=1 SV=1	tr|A6X8Z3|A6X8Z3_MOUSE	523	S	YPQGVAPQRS|79.97|K	1	GVAPQRS*K+++++	1	54.07	2.8145	0.2919	0.2919	53.45	NO OTHERS:1	YPQGVAPQRS|79.97|K	1	0	0	2	YPQGVAPQRSK	ind_MOUSE.Tryp.TMT.REVUniprot20150423.CONTAM.fasta.hdr	21636	16836	75127	3	16838	21636	75127	16836	6713	3	16838	0.99	21636	75127	16836	6713	3	https://kronos.stanford.edu/cgi-bin/blast_html4?Db=/seq_db/static/ind_MOUSE.Tryp.TMT.REVUniprot20150423.CONTAM.fasta.hdr&Pep=YPQGVAPQRSK&MassType=0	https://kronos.stanford.edu/gfy/www/modules/show_out/show_out_wrapper.php?run_id=&search_id=&scans_id=&peptide_id=&scanf=&charge=	https://kronos.stanford.edu/gfy/www/modules/show_out/show_out_wrapper.php?run_id=16838&search_id=21636&scans_id=16836&peptide_id=75127&scanf=6713&charge=3	http://kronos.stanford.edu/gfy/www/modules/sdig/index.php?run_id=16838&search_id=21636&scans_id=16836&peptide_id=75127&scanf=6713	http:/kronos.stanford.edu/gfy/www/modules/ascore/visual/trim-phos.php?run_id=16838&search_id=21636&scans_id=16836&peptide_id=75127&charge=3	1.90491e+06	0.999567	0.0754215	0.490021	0.0618521	0.0683441	7.92247
Protein Sec16a OS=Mus musculus GN=Sec16a PE=1 SV=1	tr|A2AIX1|A2AIX1_MOUSE	1988	S	VPMFPVPMS|79.97|R	1	MFPVPMS*RGPLEL	1	1000	1.7929	0.4264	0.4264	28.61	NO OTHERS:1	VPMFPVPMS|79.97|R	1	0	0	2	VPMFPVPMSR	ind_MOUSE.Tryp.TMT.REVUniprot20150423.CONTAM.fasta.hdr	21634	16839	39982	2	16841	21634	39982	16839	31825	2	16841	0.99	21634	39982	16839	31825	2	https://kronos.stanford.edu/cgi-bin/blast_html4?Db=/seq_db/static/ind_MOUSE.Tryp.TMT.REVUniprot20150423.CONTAM.fasta.hdr&Pep=VPMFPVPMSR&MassType=0	https://kronos.stanford.edu/gfy/www/modules/show_out/show_out_wrapper.php?run_id=&search_id=&scans_id=&peptide_id=&scanf=&charge=	https://kronos.stanford.edu/gfy/www/modules/show_out/show_out_wrapper.php?run_id=16841&search_id=21634&scans_id=16839&peptide_id=39982&scanf=31825&charge=2	http://kronos.stanford.edu/gfy/www/modules/sdig/index.php?run_id=16841&search_id=21634&scans_id=16839&peptide_id=39982&scanf=31825	http:/kronos.stanford.edu/gfy/www/modules/ascore/visual/trim-phos.php?run_id=16841&search_id=21634&scans_id=16839&peptide_id=39982&charge=2	633969	0.972324	0.055968	0.453517	0.0592024	0.0637668	7.66045
Transforming acidic coiled-coil-containing protein 2 OS=Mus musculus GN=Tacc2 PE=1 SV=1	tr|E9Q8T1|E9Q8T1_MOUSE	2532	S	GLPS|79.97|SQEPLLQVPEKPSQK	1	VARGLPS*SQEPLL	1	0	1.7477	0.0837	0.3084	21.02	NO OTHERS:1	NONE > ascore = 13	1	0	0	6	GLPSSQEPLLQVPEKPSQK	ind_MOUSE.Tryp.TMT.REVUniprot20150423.CONTAM.fasta.hdr	21634	16839	24021	2	16841	21634	24021	16839	22978	2	16841	0.99	21634	24021	16839	22978	2	https://kronos.stanford.edu/cgi-bin/blast_html4?Db=/seq_db/static/ind_MOUSE.Tryp.TMT.REVUniprot20150423.CONTAM.fasta.hdr&Pep=GLPSSQEPLLQVPEKPSQK&MassType=0	https://kronos.stanford.edu/gfy/www/modules/show_out/show_out_wrapper.php?run_id=&search_id=&scans_id=&peptide_id=&scanf=&charge=	https://kronos.stanford.edu/gfy/www/modules/show_out/show_out_wrapper.php?run_id=16841&search_id=21634&scans_id=16839&peptide_id=24021&scanf=22978&charge=2	http://kronos.stanford.edu/gfy/www/modules/sdig/index.php?run_id=16841&search_id=21634&scans_id=16839&peptide_id=24021&scanf=22978	http:/kronos.stanford.edu/gfy/www/modules/ascore/visual/trim-phos.php?run_id=16841&search_id=21634&scans_id=16839&peptide_id=24021&charge=2	153874	0.97711	0.0849375	0.416514	0.0551419	0.140033	7.5535
Reticulon-4 OS=Mus musculus GN=Rtn4 PE=1 SV=2	sp|Q99P72|RTN4_MOUSE	690	S	LSTEPS|79.97|PEFSNYSEIAK	1	KLSTEPS*PEFSNY	2	18.34	3.7015	0.1915	0.5373	73.45	NO OTHERS:2	LSTEPS|79.97|PEFSNYSEIAK	2	0	0	1	LSTEPSPEFSNYSEIAK	ind_MOUSE.Tryp.TMT.REVUniprot20150423.CONTAM.fasta.hdr	21638	16834	36198	2	16836	21638	36198	16834	29887	2	16836	0.99	21638	36198	16834	29887	2	https://kronos.stanford.edu/cgi-bin/blast_html4?Db=/seq_db/static/ind_MOUSE.Tryp.TMT.REVUniprot20150423.CONTAM.fasta.hdr&Pep=LSTEPSPEFSNYSEIAK&MassType=0	https://kronos.stanford.edu/gfy/www/modules/show_out/show_out_wrapper.php?run_id=&search_id=&scans_id=&peptide_id=&scanf=&charge=	https://kronos.stanford.edu/gfy/www/modules/show_out/show_out_wrapper.php?run_id=16836&search_id=21638&scans_id=16834&peptide_id=36198&scanf=29887&charge=2	http://kronos.stanford.edu/gfy/www/modules/sdig/index.php?run_id=16836&search_id=21638&scans_id=16834&peptide_id=36198&scanf=29887	http:/kronos.stanford.edu/gfy/www/modules/ascore/visual/trim-phos.php?run_id=16836&search_id=21638&scans_id=16834&peptide_id=36198&charge=2	2.48298e+06	0.934047	0.0465223	0.405023	0.0545545	0.101028	7.42419
A-kinase anchor protein 2 OS=Mus musculus GN=Akap2 PE=4 SV=1	tr|A2API8|A2API8_MOUSE	718	S	GPS|79.97|QPPTAAQPSGPVNMEETRPEGGYFSK	1	LREKGPS*QPPTAA	1	8.7	3.3506	0.0989	0.3502	56.26	NO OTHERS:1	NONE > ascore = 13	1	0	0	6	GPSQPPTAAQPSGPVNMEETRPEGGYFSK	ind_MOUSE.Tryp.TMT.REVUniprot20150423.CONTAM.fasta.hdr	21636	16836	16319	4	16838	21636	16319	16836	19382	4	16838	0.99	21636	16319	16836	19382	4	https://kronos.stanford.edu/cgi-bin/blast_html4?Db=/seq_db/static/ind_MOUSE.Tryp.TMT.REVUniprot20150423.CONTAM.fasta.hdr&Pep=GPSQPPTAAQPSGPVNMEETRPEGGYFSK&MassType=0	https://kronos.stanford.edu/gfy/www/modules/show_out/show_out_wrapper.php?run_id=&search_id=&scans_id=&peptide_id=&scanf=&charge=	https://kronos.stanford.edu/gfy/www/modules/show_out/show_out_wrapper.php?run_id=16838&search_id=21636&scans_id=16836&peptide_id=16319&scanf=19382&charge=4	http://kronos.stanford.edu/gfy/www/modules/sdig/index.php?run_id=16838&search_id=21636&scans_id=16836&peptide_id=16319&scanf=19382	http:/kronos.stanford.edu/gfy/www/modules/ascore/visual/trim-phos.php?run_id=16838&search_id=21636&scans_id=16836&peptide_id=16319&charge=4	766469	0.979286	0.0654368	0.524534	0.0709536	0.102648	7.39264
TBC1 domain family member 5 OS=Mus musculus GN=Tbc1d5 PE=1 SV=2	sp|Q80XQ2|TBCD5_MOUSE	477	S	KLISPASAPGS|79.97|MGGPVPGNNSSSSFSAAIPTR	1	PASAPGS*MGGPVP	2	6.32	4.4315	0.0224	0.4398	46.68	NO OTHERS:2	NONE > ascore = 13	2	0	0	0	KLISPASAPGSMGGPVPGNNSSSSFSAAIPTR	ind_MOUSE.Tryp.TMT.REVUniprot20150423.CONTAM.fasta.hdr	21634	16839	21246	3	16841	21634	21246	16839	21536	3	16841	0.99	21634	21246	16839	21536	3	https://kronos.stanford.edu/cgi-bin/blast_html4?Db=/seq_db/static/ind_MOUSE.Tryp.TMT.REVUniprot20150423.CONTAM.fasta.hdr&Pep=KLISPASAPGSMGGPVPGNNSSSSFSAAIPTR&MassType=0	https://kronos.stanford.edu/gfy/www/modules/show_out/show_out_wrapper.php?run_id=&search_id=&scans_id=&peptide_id=&scanf=&charge=	https://kronos.stanford.edu/gfy/www/modules/show_out/show_out_wrapper.php?run_id=16841&search_id=21634&scans_id=16839&peptide_id=21246&scanf=21536&charge=3	http://kronos.stanford.edu/gfy/www/modules/sdig/index.php?run_id=16841&search_id=21634&scans_id=16839&peptide_id=21246&scanf=21536	http:/kronos.stanford.edu/gfy/www/modules/ascore/visual/trim-phos.php?run_id=16841&search_id=21634&scans_id=16839&peptide_id=21246&charge=3	547421	0.91222	0.0501833	0.407567	0.0557919	0.0727401	7.30514
Serine/threonine-protein kinase WNK1 OS=Mus musculus GN=Wnk1 PE=1 SV=2	sp|P83741|WNK1_MOUSE	165	S	DRPVS|79.97|QPSLVGSKEEPPPSR	1	SKDRPVS*QPSLVG	3	18.47	2.6988	0.0004	0.4344	49.7	NO OTHERS:3	DRPVS|79.97|QPSLVGSK, DRPVS|79.97|QPSLVGSKEEPPPSR	3	0	0	5	DRPVSQPSLVGSKEEPPPSR	ind_MOUSE.Tryp.TMT.REVUniprot20150423.CONTAM.fasta.hdr	21638	16834	86051	3	16836	21637	83779	16835	9698	3		0.99	21637	83779	16835	9935	3	https://kronos.stanford.edu/cgi-bin/blast_html4?Db=/seq_db/static/ind_MOUSE.Tryp.TMT.REVUniprot20150423.CONTAM.fasta.hdr&Pep=DRPVSQPSLVGSKEEPPPSR&MassType=0	https://kronos.stanford.edu/gfy/www/modules/show_out/show_out_wrapper.php?run_id=&search_id=&scans_id=&peptide_id=&scanf=&charge=	https://kronos.stanford.edu/gfy/www/modules/show_out/show_out_wrapper.php?run_id=&search_id=21637&scans_id=16835&peptide_id=83779&scanf=9698&charge=3	http://kronos.stanford.edu/gfy/www/modules/sdig/index.php?run_id=&search_id=21637&scans_id=16835&peptide_id=83779&scanf=9698	http:/kronos.stanford.edu/gfy/www/modules/ascore/visual/trim-phos.php?run_id=16836&search_id=21638&scans_id=16834&peptide_id=86051&charge=3	2.84851e+06	0.840378	0.0581488	0.345173	0.0476871	0.182702	7.23829
Staphylococcal nuclease domain-containing protein 1 OS=Mus musculus GN=Snd1 PE=2 SV=1	tr|Q3TJ56|Q3TJ56_MOUSE	426	S	VNVTVDYIRPAS|79.97|PATETVPAFSER	1	DYIRPAS*PATETV	4	20.57	4.2711	0.0589	0.4018	56.68	NO OTHERS:4	KVNVTVDYIRPAS|79.97|PATETVPAFSER, VNVTVDYIRPAS|79.97|PATETVPAFSER	4	0	0	1	VNVTVDYIRPASPATETVPAFSER	ind_MOUSE.Tryp.TMT.REVUniprot20150423.CONTAM.fasta.hdr	21636	16836	29756	3		21634	38886	16839	31231	4	16841	0.99	21637	33973	16835	28655	3	https://kronos.stanford.edu/cgi-bin/blast_html4?Db=/seq_db/static/ind_MOUSE.Tryp.TMT.REVUniprot20150423.CONTAM.fasta.hdr&Pep=VNVTVDYIRPASPATETVPAFSER&MassType=0	https://kronos.stanford.edu/gfy/www/modules/show_out/show_out_wrapper.php?run_id=&search_id=&scans_id=&peptide_id=&scanf=&charge=	https://kronos.stanford.edu/gfy/www/modules/show_out/show_out_wrapper.php?run_id=16841&search_id=21634&scans_id=16839&peptide_id=38886&scanf=31231&charge=4	http://kronos.stanford.edu/gfy/www/modules/sdig/index.php?run_id=16841&search_id=21634&scans_id=16839&peptide_id=38886&scanf=31231	http:/kronos.stanford.edu/gfy/www/modules/ascore/visual/trim-phos.php?run_id=&search_id=21636&scans_id=16836&peptide_id=29756&charge=3	5.84167e+06	0.881387	0.0641379	0.382578	0.0529015	0.0700106	7.23189
Microtubule-associated protein 1A OS=Mus musculus GN=Map1a PE=1 SV=1	tr|A2ARP8|A2ARP8_MOUSE	2861	S	S|79.97|TPSQVTSEEKDGHSPMSK	1	ALPRPRS*TPSQVT	2	33.63	2.5589	0.0495	0.3294	47.46	NO OTHERS:2	S|79.97|TPSQVTSEEKDGHSPMSK	2	0	0	2	STPSQVTSEEKDGHSPMSK	ind_MOUSE.Tryp.TMT.REVUniprot20150423.CONTAM.fasta.hdr	21637	16835	82124	3		21637	82124	16835	8762	3		0.99	21637	82124	16835	5936	3	https://kronos.stanford.edu/cgi-bin/blast_html4?Db=/seq_db/static/ind_MOUSE.Tryp.TMT.REVUniprot20150423.CONTAM.fasta.hdr&Pep=STPSQVTSEEKDGHSPMSK&MassType=0	https://kronos.stanford.edu/gfy/www/modules/show_out/show_out_wrapper.php?run_id=&search_id=&scans_id=&peptide_id=&scanf=&charge=	https://kronos.stanford.edu/gfy/www/modules/show_out/show_out_wrapper.php?run_id=&search_id=21637&scans_id=16835&peptide_id=82124&scanf=8762&charge=3	http://kronos.stanford.edu/gfy/www/modules/sdig/index.php?run_id=&search_id=21637&scans_id=16835&peptide_id=82124&scanf=8762	http:/kronos.stanford.edu/gfy/www/modules/ascore/visual/trim-phos.php?run_id=&search_id=21637&scans_id=16835&peptide_id=82124&charge=3	4.09704e+06	0.880765	0.0447851	0.382712	0.0530344	0.191428	7.21629
Eukaryotic translation initiation factor 2D OS=Mus musculus GN=Eif2d PE=4 SV=1	tr|E9PUG7|E9PUG7_MOUSE	238	S	APS|79.97|QDSLDGKPLQEQMDDLLLR	1	TSSRAPS*QDSLDG	1	12.32	2.8096	0.0014	0.2533	43.29	NO OTHERS:1	NONE > ascore = 13	1	0	0	3	APSQDSLDGKPLQEQMDDLLLR	ind_MOUSE.Tryp.TMT.REVUniprot20150423.CONTAM.fasta.hdr	21638	16834	52982	3	16836	21638	52982	16834	38914	3	16836	0.99	21638	52982	16834	38914	3	https://kronos.stanford.edu/cgi-bin/blast_html4?Db=/seq_db/static/ind_MOUSE.Tryp.TMT.REVUniprot20150423.CONTAM.fasta.hdr&Pep=APSQDSLDGKPLQEQMDDLLLR&MassType=0	https://kronos.stanford.edu/gfy/www/modules/show_out/show_out_wrapper.php?run_id=&search_id=&scans_id=&peptide_id=&scanf=&charge=	https://kronos.stanford.edu/gfy/www/modules/show_out/show_out_wrapper.php?run_id=16836&search_id=21638&scans_id=16834&peptide_id=52982&scanf=38914&charge=3	http://kronos.stanford.edu/gfy/www/modules/sdig/index.php?run_id=16836&search_id=21638&scans_id=16834&peptide_id=52982&scanf=38914	http:/kronos.stanford.edu/gfy/www/modules/ascore/visual/trim-phos.php?run_id=16836&search_id=21638&scans_id=16834&peptide_id=52982&charge=3	418724	0.490549	0.0283298	0.292189	0.0404944	0.372109	7.21554
Uncharacterized protein C1orf198 homolog OS=Mus musculus PE=2 SV=1	sp|Q8C3W1|CA198_MOUSE	176	S	SSS|79.97|LDALGPARK	1	QSSRSSS*LDALGP	1	9.82	2.2004	0.0048	0.2119	45.63	NO OTHERS:1	NONE > ascore = 13	1	0	0	0	SSSLDALGPARK	ind_MOUSE.Tryp.TMT.REVUniprot20150423.CONTAM.fasta.hdr	21636	16836	3215	3	16838	21636	3215	16836	11718	3	16838	0.99	21636	3215	16836	11718	3	https://kronos.stanford.edu/cgi-bin/blast_html4?Db=/seq_db/static/ind_MOUSE.Tryp.TMT.REVUniprot20150423.CONTAM.fasta.hdr&Pep=SSSLDALGPARK&MassType=0	https://kronos.stanford.edu/gfy/www/modules/show_out/show_out_wrapper.php?run_id=&search_id=&scans_id=&peptide_id=&scanf=&charge=	https://kronos.stanford.edu/gfy/www/modules/show_out/show_out_wrapper.php?run_id=16838&search_id=21636&scans_id=16836&peptide_id=3215&scanf=11718&charge=3	http://kronos.stanford.edu/gfy/www/modules/sdig/index.php?run_id=16838&search_id=21636&scans_id=16836&peptide_id=3215&scanf=11718	http:/kronos.stanford.edu/gfy/www/modules/ascore/visual/trim-phos.php?run_id=16838&search_id=21636&scans_id=16836&peptide_id=3215&charge=3	3.87671e+06	0.928419	0.0701544	0.378007	0.0526155	0.176874	7.18432
Synaptojanin-1 OS=Mus musculus GN=Synj1 PE=1 SV=1	tr|D3Z656|D3Z656_MOUSE	1121	S	APSRTPGPPSS|79.97|QGSPVDTQPAAQK	1	TPGPPSS*QGSPVD	1	7.95	3.3073	0.0299	0.316	41.65	NO OTHERS:1	NONE > ascore = 13	1	0	0	3	APSRTPGPPSSQGSPVDTQPAAQK	ind_MOUSE.Tryp.TMT.REVUniprot20150423.CONTAM.fasta.hdr	21636	16836	78783	3	16838	21636	78783	16836	8828	3	16838	0.99	21636	78783	16836	8828	3	https://kronos.stanford.edu/cgi-bin/blast_html4?Db=/seq_db/static/ind_MOUSE.Tryp.TMT.REVUniprot20150423.CONTAM.fasta.hdr&Pep=APSRTPGPPSSQGSPVDTQPAAQK&MassType=0	https://kronos.stanford.edu/gfy/www/modules/show_out/show_out_wrapper.php?run_id=&search_id=&scans_id=&peptide_id=&scanf=&charge=	https://kronos.stanford.edu/gfy/www/modules/show_out/show_out_wrapper.php?run_id=16838&search_id=21636&scans_id=16836&peptide_id=78783&scanf=8828&charge=3	http://kronos.stanford.edu/gfy/www/modules/sdig/index.php?run_id=16838&search_id=21636&scans_id=16836&peptide_id=78783&scanf=8828	http:/kronos.stanford.edu/gfy/www/modules/ascore/visual/trim-phos.php?run_id=16838&search_id=21636&scans_id=16836&peptide_id=78783&charge=3	584012	0.989182	0.074263	0.461082	0.0644147	0.0765964	7.15804
Hepatocyte growth factor-regulated tyrosine kinase substrate OS=Mus musculus GN=Hgs PE=1 SV=1	tr|B1ATZ0|B1ATZ0_MOUSE	300	S	AEPTPLASS|79.97|APPAGSLYSSPVNSSAPLAEDIDPELAR	1	PTPLASS*APPAGS	1	0.74	3.1904	0.0071	0.3026	29.4	NO OTHERS:1	NONE > ascore = 13	1	0	0	4	AEPTPLASSAPPAGSLYSSPVNSSAPLAEDIDPELAR	ind_MOUSE.Tryp.TMT.REVUniprot20150423.CONTAM.fasta.hdr	21638	16834	54360	3	16836	21638	54360	16834	39632	3	16836	0.99	21638	54360	16834	39632	3	https://kronos.stanford.edu/cgi-bin/blast_html4?Db=/seq_db/static/ind_MOUSE.Tryp.TMT.REVUniprot20150423.CONTAM.fasta.hdr&Pep=AEPTPLASSAPPAGSLYSSPVNSSAPLAEDIDPELAR&MassType=0	https://kronos.stanford.edu/gfy/www/modules/show_out/show_out_wrapper.php?run_id=&search_id=&scans_id=&peptide_id=&scanf=&charge=	https://kronos.stanford.edu/gfy/www/modules/show_out/show_out_wrapper.php?run_id=16836&search_id=21638&scans_id=16834&peptide_id=54360&scanf=39632&charge=3	http://kronos.stanford.edu/gfy/www/modules/sdig/index.php?run_id=16836&search_id=21638&scans_id=16834&peptide_id=54360&scanf=39632	http:/kronos.stanford.edu/gfy/www/modules/ascore/visual/trim-phos.php?run_id=16836&search_id=21638&scans_id=16834&peptide_id=54360&charge=3	246123	0.943892	0.0812991	0.403598	0.0565949	0.0723128	7.13135
YTH domain-containing family protein 3 OS=Mus musculus GN=Ythdf3 PE=1 SV=2	sp|Q8BYK6|YTHD3_MOUSE	385	S	GTGFNQNNGTGSENFGLGVVPVSAS|79.97|PSSVEVHPVLEK	1	VVPVSAS*PSSVEV	2	0	4.3888	0.0065	0.1058	62.11	NO OTHERS:2	NONE > ascore = 13	2	0	0	2	GTGFNQNNGTGSENFGLGVVPVSASPSSVEVHPVLEK	ind_MOUSE.Tryp.TMT.REVUniprot20150423.CONTAM.fasta.hdr	21636	16836	38817	3	16838	21634	52875	16839	39288	3		0.99	21634	52875	16839	31860	3	https://kronos.stanford.edu/cgi-bin/blast_html4?Db=/seq_db/static/ind_MOUSE.Tryp.TMT.REVUniprot20150423.CONTAM.fasta.hdr&Pep=GTGFNQNNGTGSENFGLGVVPVSASPSSVEVHPVLEK&MassType=0	https://kronos.stanford.edu/gfy/www/modules/show_out/show_out_wrapper.php?run_id=&search_id=&scans_id=&peptide_id=&scanf=&charge=	https://kronos.stanford.edu/gfy/www/modules/show_out/show_out_wrapper.php?run_id=&search_id=21634&scans_id=16839&peptide_id=52875&scanf=39288&charge=3	http://kronos.stanford.edu/gfy/www/modules/sdig/index.php?run_id=&search_id=21634&scans_id=16839&peptide_id=52875&scanf=39288	http:/kronos.stanford.edu/gfy/www/modules/ascore/visual/trim-phos.php?run_id=16838&search_id=21636&scans_id=16836&peptide_id=38817&charge=3	399482	0.955936	0.0647188	0.406049	0.0581548	0.115972	6.98221
Protein Arid1b OS=Mus musculus GN=Arid1b PE=4 SV=1	tr|E9Q4N6|E9Q4N6_MOUSE	143	S	S|79.97|QPPLAPGK	1	EGYGTRS*QPPLAP	2	1000	1.6764	0.3392	0.3392	75.13	NO OTHERS:2	S|79.97|QPPLAPGK	2	0	0	2	SQPPLAPGK	ind_MOUSE.Tryp.TMT.REVUniprot20150423.CONTAM.fasta.hdr	21637	16835	5573	2	16837	21637	5573	16835	12872	2	16837	0.99	21636	3451	16836	12872	2	https://kronos.stanford.edu/cgi-bin/blast_html4?Db=/seq_db/static/ind_MOUSE.Tryp.TMT.REVUniprot20150423.CONTAM.fasta.hdr&Pep=SQPPLAPGK&MassType=0	https://kronos.stanford.edu/gfy/www/modules/show_out/show_out_wrapper.php?run_id=&search_id=&scans_id=&peptide_id=&scanf=&charge=	https://kronos.stanford.edu/gfy/www/modules/show_out/show_out_wrapper.php?run_id=16837&search_id=21637&scans_id=16835&peptide_id=5573&scanf=12872&charge=2	http://kronos.stanford.edu/gfy/www/modules/sdig/index.php?run_id=16837&search_id=21637&scans_id=16835&peptide_id=5573&scanf=12872	http:/kronos.stanford.edu/gfy/www/modules/ascore/visual/trim-phos.php?run_id=16837&search_id=21637&scans_id=16835&peptide_id=5573&charge=2	4.11904e+06	0.942902	0.0504188	0.405444	0.0582499	0.125775	6.96042
Serine/arginine repetitive matrix protein 2 OS=Mus musculus GN=Srrm2 PE=1 SV=3	sp|Q8BTI8|SRRM2_MOUSE	2150	S	IALALTAISLGTARPPPS|79.97|MSAAGLAAR	1	TARPPPS*MSAAGL	1	0	2.8179	0.0468	0.43	53.19	NO OTHERS:1	NONE > ascore = 13	1	0	0	2	IALALTAISLGTARPPPSMSAAGLAAR	ind_MOUSE.Tryp.TMT.REVUniprot20150423.CONTAM.fasta.hdr	21635	16837	45250	3	16839	21635	45250	16837	37374	3	16839	0.99	21635	45250	16837	37374	3	https://kronos.stanford.edu/cgi-bin/blast_html4?Db=/seq_db/static/ind_MOUSE.Tryp.TMT.REVUniprot20150423.CONTAM.fasta.hdr&Pep=IALALTAISLGTARPPPSMSAAGLAAR&MassType=0	https://kronos.stanford.edu/gfy/www/modules/show_out/show_out_wrapper.php?run_id=&search_id=&scans_id=&peptide_id=&scanf=&charge=	https://kronos.stanford.edu/gfy/www/modules/show_out/show_out_wrapper.php?run_id=16839&search_id=21635&scans_id=16837&peptide_id=45250&scanf=37374&charge=3	http://kronos.stanford.edu/gfy/www/modules/sdig/index.php?run_id=16839&search_id=21635&scans_id=16837&peptide_id=45250&scanf=37374	http:/kronos.stanford.edu/gfy/www/modules/ascore/visual/trim-phos.php?run_id=16839&search_id=21635&scans_id=16837&peptide_id=45250&charge=3	94888.3	0.977099	0.0771963	0.459748	0.0667823	0.109393	6.88427
SH3 domain-containing kinase-binding protein 1 (Fragment) OS=Mus musculus GN=Sh3kbp1 PE=4 SV=1	tr|B0R0Y8|B0R0Y8_MOUSE	23	S	GDS|79.97|PKIDLAGSALSGILDKDLSDR	1	THTRGDS*PKIDLA	1	42.87	3.6872	0.0456	0.2363	68.17	NO OTHERS:1	GDS|79.97|PKIDLAGSALSGILDKDLSDR	1	0	0	6	GDSPKIDLAGSALSGILDKDLSDR	ind_MOUSE.Tryp.TMT.REVUniprot20150423.CONTAM.fasta.hdr	21636	16836	46843	3	16838	21636	46843	16836	36215	3	16838	0.99	21636	46843	16836	36215	3	https://kronos.stanford.edu/cgi-bin/blast_html4?Db=/seq_db/static/ind_MOUSE.Tryp.TMT.REVUniprot20150423.CONTAM.fasta.hdr&Pep=GDSPKIDLAGSALSGILDKDLSDR&MassType=0	https://kronos.stanford.edu/gfy/www/modules/show_out/show_out_wrapper.php?run_id=&search_id=&scans_id=&peptide_id=&scanf=&charge=	https://kronos.stanford.edu/gfy/www/modules/show_out/show_out_wrapper.php?run_id=16838&search_id=21636&scans_id=16836&peptide_id=46843&scanf=36215&charge=3	http://kronos.stanford.edu/gfy/www/modules/sdig/index.php?run_id=16838&search_id=21636&scans_id=16836&peptide_id=46843&scanf=36215	http:/kronos.stanford.edu/gfy/www/modules/ascore/visual/trim-phos.php?run_id=16838&search_id=21636&scans_id=16836&peptide_id=46843&charge=3	460873	0.997799	0.063136	0.504645	0.0735606	0.0851296	6.86027
E3 ubiquitin-protein ligase UBR4 OS=Mus musculus GN=Ubr4 PE=1 SV=1	sp|A2AN08|UBR4_MOUSE	3341	S	VLAALAASTGSSS|79.97|VASSSAPPAASSGQATTQSK	1	ASTGSSS*VASSSA	1	4.46	5.138	0.0112	0.2288	53.4	NO OTHERS:1	NONE > ascore = 13	1	0	0	5	VLAALAASTGSSSVASSSAPPAASSGQATTQSK	ind_MOUSE.Tryp.TMT.REVUniprot20150423.CONTAM.fasta.hdr	21634	16839	29185	4	16841	21634	29185	16839	25847	4	16841	0.99	21634	29185	16839	25847	4	https://kronos.stanford.edu/cgi-bin/blast_html4?Db=/seq_db/static/ind_MOUSE.Tryp.TMT.REVUniprot20150423.CONTAM.fasta.hdr&Pep=VLAALAASTGSSSVASSSAPPAASSGQATTQSK&MassType=0	https://kronos.stanford.edu/gfy/www/modules/show_out/show_out_wrapper.php?run_id=&search_id=&scans_id=&peptide_id=&scanf=&charge=	https://kronos.stanford.edu/gfy/www/modules/show_out/show_out_wrapper.php?run_id=16841&search_id=21634&scans_id=16839&peptide_id=29185&scanf=25847&charge=4	http://kronos.stanford.edu/gfy/www/modules/sdig/index.php?run_id=16841&search_id=21634&scans_id=16839&peptide_id=29185&scanf=25847	http:/kronos.stanford.edu/gfy/www/modules/ascore/visual/trim-phos.php?run_id=16841&search_id=21634&scans_id=16839&peptide_id=29185&charge=4	533197	0.981955	0.106115	0.401158	0.0591767	0.0908029	6.77899
Apoptosis-stimulating of p53 protein 2 (Fragment) OS=Mus musculus GN=Trp53bp2 PE=4 SV=1	tr|A0A0A6YX89|A0A0A6YX89_MOUSE	64	S	MLLS|79.97|PGAPSGGQDQVLSPASK	1	QARMLLS*PGAPSG	1	6.66	2.9011	0.0995	0.4846	31.26	NO OTHERS:1	NONE > ascore = 13	1	0	0	2	MLLSPGAPSGGQDQVLSPASK	ind_MOUSE.Tryp.TMT.REVUniprot20150423.CONTAM.fasta.hdr	21634	16839	29305	2	16841	21634	29305	16839	25912	2	16841	0.99	21634	29305	16839	25912	2	https://kronos.stanford.edu/cgi-bin/blast_html4?Db=/seq_db/static/ind_MOUSE.Tryp.TMT.REVUniprot20150423.CONTAM.fasta.hdr&Pep=MLLSPGAPSGGQDQVLSPASK&MassType=0	https://kronos.stanford.edu/gfy/www/modules/show_out/show_out_wrapper.php?run_id=&search_id=&scans_id=&peptide_id=&scanf=&charge=	https://kronos.stanford.edu/gfy/www/modules/show_out/show_out_wrapper.php?run_id=16841&search_id=21634&scans_id=16839&peptide_id=29305&scanf=25912&charge=2	http://kronos.stanford.edu/gfy/www/modules/sdig/index.php?run_id=16841&search_id=21634&scans_id=16839&peptide_id=29305&scanf=25912	http:/kronos.stanford.edu/gfy/www/modules/ascore/visual/trim-phos.php?run_id=16841&search_id=21634&scans_id=16839&peptide_id=29305&charge=2	329092	0.913707	0.0676346	0.371045	0.0552483	0.0876328	6.71595
WAS/WASL-interacting protein family member 1 OS=Mus musculus GN=Wipf1 PE=1 SV=1	sp|Q8K1I7|WIPF1_MOUSE	334	S	NLSLTSS|79.97|APPLPSPGR	1	NLSLTSS*APPLPS	1	6.9	2.5015	0.0356	0.2957	43.34	NO OTHERS:1	NONE > ascore = 13	1	0	0	0	NLSLTSSAPPLPSPGR	ind_MOUSE.Tryp.TMT.REVUniprot20150423.CONTAM.fasta.hdr	21634	16839	21701	2	16841	21634	21701	16839	21774	2	16841	0.99	21634	21701	16839	21774	2	https://kronos.stanford.edu/cgi-bin/blast_html4?Db=/seq_db/static/ind_MOUSE.Tryp.TMT.REVUniprot20150423.CONTAM.fasta.hdr&Pep=NLSLTSSAPPLPSPGR&MassType=0	https://kronos.stanford.edu/gfy/www/modules/show_out/show_out_wrapper.php?run_id=&search_id=&scans_id=&peptide_id=&scanf=&charge=	https://kronos.stanford.edu/gfy/www/modules/show_out/show_out_wrapper.php?run_id=16841&search_id=21634&scans_id=16839&peptide_id=21701&scanf=21774&charge=2	http://kronos.stanford.edu/gfy/www/modules/sdig/index.php?run_id=16841&search_id=21634&scans_id=16839&peptide_id=21701&scanf=21774	http:/kronos.stanford.edu/gfy/www/modules/ascore/visual/trim-phos.php?run_id=16841&search_id=21634&scans_id=16839&peptide_id=21701&charge=2	401119	0.984254	0.115425	0.421232	0.0628994	0.114416	6.69691
Friend virus susceptibility protein 1 OS=Mus musculus GN=Fv1 PE=2 SV=1	sp|P70213|FV1_MOUSE	244	S	S|79.97|LSDLTSQK	1	PVTRPKS*LSDLTS	5	32.4	2.2033	0.1192	0.3817	72.92	NO OTHERS:5	S|79.97|LSDLTSQK	5	0	0	0	SLSDLTSQK	ind_MOUSE.Tryp.TMT.REVUniprot20150423.CONTAM.fasta.hdr	21638	16834	19374	2	16836	21637	17089	16835	19596	2		0.99	21638	21472	16834	20922	2	https://kronos.stanford.edu/cgi-bin/blast_html4?Db=/seq_db/static/ind_MOUSE.Tryp.TMT.REVUniprot20150423.CONTAM.fasta.hdr&Pep=SLSDLTSQK&MassType=0	https://kronos.stanford.edu/gfy/www/modules/show_out/show_out_wrapper.php?run_id=&search_id=&scans_id=&peptide_id=&scanf=&charge=	https://kronos.stanford.edu/gfy/www/modules/show_out/show_out_wrapper.php?run_id=&search_id=21637&scans_id=16835&peptide_id=17089&scanf=19596&charge=2	http://kronos.stanford.edu/gfy/www/modules/sdig/index.php?run_id=&search_id=21637&scans_id=16835&peptide_id=17089&scanf=19596	http:/kronos.stanford.edu/gfy/www/modules/ascore/visual/trim-phos.php?run_id=16836&search_id=21638&scans_id=16834&peptide_id=19374&charge=2	1.50165e+07	0.813257	0.0489834	0.339386	0.0508419	0.156458	6.67532
Neural cell adhesion molecule 1 (Fragment) OS=Mus musculus GN=Ncam1 PE=1 SV=1	tr|A0A0A6YY91|A0A0A6YY91_MOUSE	860	S	GVTASSS|79.97|S|79.97|PASAPK	1	GVTASSS*SPASAP	2	10.28	2.1371	0.0676	0.3779	56.83	NO OTHERS:1; 861:1	NONE > ascore = 13	1	1	0	1	GVTASSSSPASAPK	ind_MOUSE.Tryp.TMT.REVUniprot20150423.CONTAM.fasta.hdr	21639	16833	8441	2	16835	21639	8441	16833	14102	2	16835	0.99	21636	76753	16836	7639	2	https://kronos.stanford.edu/cgi-bin/blast_html4?Db=/seq_db/static/ind_MOUSE.Tryp.TMT.REVUniprot20150423.CONTAM.fasta.hdr&Pep=GVTASSSSPASAPK&MassType=0	https://kronos.stanford.edu/gfy/www/modules/show_out/show_out_wrapper.php?run_id=&search_id=&scans_id=&peptide_id=&scanf=&charge=	https://kronos.stanford.edu/gfy/www/modules/show_out/show_out_wrapper.php?run_id=16835&search_id=21639&scans_id=16833&peptide_id=8441&scanf=14102&charge=2	http://kronos.stanford.edu/gfy/www/modules/sdig/index.php?run_id=16835&search_id=21639&scans_id=16833&peptide_id=8441&scanf=14102	http:/kronos.stanford.edu/gfy/www/modules/ascore/visual/trim-phos.php?run_id=16835&search_id=21639&scans_id=16833&peptide_id=8441&charge=2	820474	0.997343	0.053889	0.493416	0.0750365	0.085665	6.57568
Paxillin OS=Mus musculus GN=Pxn PE=1 SV=1	tr|F8VQ28|F8VQ28_MOUSE	226	S	GLEDVRPSVESLLDELES|79.97|SVPSPVPAITVNQGEMSSPQR	1	LLDELES*SVPSPV	1	11.53	5.5968	0.0236	0.5772	68.6	NO OTHERS:1	NONE > ascore = 13	1	0	0	2	GLEDVRPSVESLLDELESSVPSPVPAITVNQGEMSSPQR	ind_MOUSE.Tryp.TMT.REVUniprot20150423.CONTAM.fasta.hdr	21636	16836	67666	3	16838	21636	67666	16836	47152	3	16838	0.99	21636	67666	16836	47152	3	https://kronos.stanford.edu/cgi-bin/blast_html4?Db=/seq_db/static/ind_MOUSE.Tryp.TMT.REVUniprot20150423.CONTAM.fasta.hdr&Pep=GLEDVRPSVESLLDELESSVPSPVPAITVNQGEMSSPQR&MassType=0	https://kronos.stanford.edu/gfy/www/modules/show_out/show_out_wrapper.php?run_id=&search_id=&scans_id=&peptide_id=&scanf=&charge=	https://kronos.stanford.edu/gfy/www/modules/show_out/show_out_wrapper.php?run_id=16838&search_id=21636&scans_id=16836&peptide_id=67666&scanf=47152&charge=3	http://kronos.stanford.edu/gfy/www/modules/sdig/index.php?run_id=16838&search_id=21636&scans_id=16836&peptide_id=67666&scanf=47152	http:/kronos.stanford.edu/gfy/www/modules/ascore/visual/trim-phos.php?run_id=16838&search_id=21636&scans_id=16836&peptide_id=67666&charge=3	43255.6	0.963082	0.0935466	0.526624	0.0802441	0.0932909	6.56277
Band 4.1-like protein 2 OS=Mus musculus GN=Epb41l2 PE=1 SV=2	sp|O70318|E41L2_MOUSE	379	S	GLS|79.97|PAQADSQFLENAK	1	KTHRGLS*PAQADS	3	46.02	3.4653	0.1485	0.1957	53.39	NO OTHERS:3	GLS|79.97|PAQADSQFLENAK	3	0	0	0	GLSPAQADSQFLENAK	ind_MOUSE.Tryp.TMT.REVUniprot20150423.CONTAM.fasta.hdr	21638	16834	36942	3		21638	33888	16834	28680	3	16836	0.99	21636	27957	16836	28680	3	https://kronos.stanford.edu/cgi-bin/blast_html4?Db=/seq_db/static/ind_MOUSE.Tryp.TMT.REVUniprot20150423.CONTAM.fasta.hdr&Pep=GLSPAQADSQFLENAK&MassType=0	https://kronos.stanford.edu/gfy/www/modules/show_out/show_out_wrapper.php?run_id=&search_id=&scans_id=&peptide_id=&scanf=&charge=	https://kronos.stanford.edu/gfy/www/modules/show_out/show_out_wrapper.php?run_id=16836&search_id=21638&scans_id=16834&peptide_id=33888&scanf=28680&charge=3	http://kronos.stanford.edu/gfy/www/modules/sdig/index.php?run_id=16836&search_id=21638&scans_id=16834&peptide_id=33888&scanf=28680	http:/kronos.stanford.edu/gfy/www/modules/ascore/visual/trim-phos.php?run_id=&search_id=21638&scans_id=16834&peptide_id=36942&charge=3	945517	0.964765	0.0613201	0.547596	0.0837521	0.105487	6.53829
Transgelin OS=Mus musculus GN=Tagln PE=1 SV=3	sp|P37804|TAGL_MOUSE	186	S	GAS|79.97|QAGMTGYGRPR	1	GSNRGAS*QAGMTG	1	45.77	2.7133	0.1886	0.2632	33.6	NO OTHERS:1	GAS|79.97|QAGMTGYGRPR	1	0	0	0	GASQAGMTGYGRPR	ind_MOUSE.Tryp.TMT.REVUniprot20150423.CONTAM.fasta.hdr	21637	16835	75758	3	16837	21637	75758	16835	5236	3	16837	0.99	21637	75758	16835	5236	3	https://kronos.stanford.edu/cgi-bin/blast_html4?Db=/seq_db/static/ind_MOUSE.Tryp.TMT.REVUniprot20150423.CONTAM.fasta.hdr&Pep=GASQAGMTGYGRPR&MassType=0	https://kronos.stanford.edu/gfy/www/modules/show_out/show_out_wrapper.php?run_id=&search_id=&scans_id=&peptide_id=&scanf=&charge=	https://kronos.stanford.edu/gfy/www/modules/show_out/show_out_wrapper.php?run_id=16837&search_id=21637&scans_id=16835&peptide_id=75758&scanf=5236&charge=3	http://kronos.stanford.edu/gfy/www/modules/sdig/index.php?run_id=16837&search_id=21637&scans_id=16835&peptide_id=75758&scanf=5236	http:/kronos.stanford.edu/gfy/www/modules/ascore/visual/trim-phos.php?run_id=16837&search_id=21637&scans_id=16835&peptide_id=75758&charge=3	1.86603e+06	0.985038	0.12369	0.451848	0.06932	0.0759124	6.51829
Tensin-like C1 domain-containing phosphatase OS=Mus musculus GN=Tenc1 PE=1 SV=1	sp|Q8CGB6|TENC1_MOUSE	1238	S	IPS|79.97|KDPLEETPEAPVPTNMSTAADLLR	1	CCLRIPS*KDPLEE	1	14.73	3.3947	0.2066	0.3563	47.76	NO OTHERS:1	IPS|79.97|KDPLEETPEAPVPTNMSTAADLLR	1	0	0	3	IPSKDPLEETPEAPVPTNMSTAADLLR	ind_MOUSE.Tryp.TMT.REVUniprot20150423.CONTAM.fasta.hdr	21637	16835	46994	3	16837	21637	46994	16835	35673	3	16837	0.99	21637	46994	16835	35673	3	https://kronos.stanford.edu/cgi-bin/blast_html4?Db=/seq_db/static/ind_MOUSE.Tryp.TMT.REVUniprot20150423.CONTAM.fasta.hdr&Pep=IPSKDPLEETPEAPVPTNMSTAADLLR&MassType=0	https://kronos.stanford.edu/gfy/www/modules/show_out/show_out_wrapper.php?run_id=&search_id=&scans_id=&peptide_id=&scanf=&charge=	https://kronos.stanford.edu/gfy/www/modules/show_out/show_out_wrapper.php?run_id=16837&search_id=21637&scans_id=16835&peptide_id=46994&scanf=35673&charge=3	http://kronos.stanford.edu/gfy/www/modules/sdig/index.php?run_id=16837&search_id=21637&scans_id=16835&peptide_id=46994&scanf=35673	http:/kronos.stanford.edu/gfy/www/modules/ascore/visual/trim-phos.php?run_id=16837&search_id=21637&scans_id=16835&peptide_id=46994&charge=3	186792	0.892251	0.0554611	0.382163	0.0587669	0.0865925	6.50304
Nucleoporin NUP53 (Fragment) OS=Mus musculus GN=Nup35 PE=4 SV=1	tr|A2ATJ2|A2ATJ2_MOUSE	53	S	S|79.97|ISGPSVGVMEMR	1	VTPQPRS*ISGPSV	2	28.87	1.7752	0.01	0.2678	44.19	NO OTHERS:2	S|79.97|ISGPSVGVMEMR	2	0	0	1	SISGPSVGVMEMR	ind_MOUSE.Tryp.TMT.REVUniprot20150423.CONTAM.fasta.hdr	21637	16835	26694	2	16837	21637	26694	16835	24764	2	16837	0.99	21637	26694	16835	24764	2	https://kronos.stanford.edu/cgi-bin/blast_html4?Db=/seq_db/static/ind_MOUSE.Tryp.TMT.REVUniprot20150423.CONTAM.fasta.hdr&Pep=SISGPSVGVMEMR&MassType=0	https://kronos.stanford.edu/gfy/www/modules/show_out/show_out_wrapper.php?run_id=&search_id=&scans_id=&peptide_id=&scanf=&charge=	https://kronos.stanford.edu/gfy/www/modules/show_out/show_out_wrapper.php?run_id=16837&search_id=21637&scans_id=16835&peptide_id=26694&scanf=24764&charge=2	http://kronos.stanford.edu/gfy/www/modules/sdig/index.php?run_id=16837&search_id=21637&scans_id=16835&peptide_id=26694&scanf=24764	http:/kronos.stanford.edu/gfy/www/modules/ascore/visual/trim-phos.php?run_id=16837&search_id=21637&scans_id=16835&peptide_id=26694&charge=2	3.45905e+06	0.993109	0.0575921	0.495541	0.0763522	0.10226	6.4902
SURP and G-patch domain-containing protein 1 OS=Mus musculus GN=Sugp1 PE=1 SV=1	sp|Q8CH02|SUGP1_MOUSE	407	S	DIDAS|79.97|PS|79.97|PLSVQDLK	1	QRDIDAS*PSPLSV	3	22.16	2.8926	0.1114	0.4533	62.93	NO OTHERS:2; 409:1	DIDAS|79.97|PSPLSVQDLK, DIDAS|79.97|PS|79.97|PLSVQDLK	2	1	0	0	DIDASPSPLSVQDLK	ind_MOUSE.Tryp.TMT.REVUniprot20150423.CONTAM.fasta.hdr	21639	16833	45689	2	16835	21637	36027	16835	29766	2		0.99	21637	36027	16835	31082	2	https://kronos.stanford.edu/cgi-bin/blast_html4?Db=/seq_db/static/ind_MOUSE.Tryp.TMT.REVUniprot20150423.CONTAM.fasta.hdr&Pep=DIDASPSPLSVQDLK&MassType=0	https://kronos.stanford.edu/gfy/www/modules/show_out/show_out_wrapper.php?run_id=&search_id=&scans_id=&peptide_id=&scanf=&charge=	https://kronos.stanford.edu/gfy/www/modules/show_out/show_out_wrapper.php?run_id=&search_id=21637&scans_id=16835&peptide_id=36027&scanf=29766&charge=2	http://kronos.stanford.edu/gfy/www/modules/sdig/index.php?run_id=&search_id=21637&scans_id=16835&peptide_id=36027&scanf=29766	http:/kronos.stanford.edu/gfy/www/modules/ascore/visual/trim-phos.php?run_id=16835&search_id=21639&scans_id=16833&peptide_id=45689&charge=2	274535	0.969918	0.0742804	0.477748	0.0738007	0.139991	6.47349
Transcription factor E2F4 OS=Mus musculus GN=E2f4 PE=2 SV=1	sp|Q8R0K9|E2F4_MOUSE	164	S	APSGTS|79.97|LEVPIPEGLNGQK	1	RAPSGTS*LEVPIP	2	0	3.8252	0.0055	0.3302	61.84	NO OTHERS:2	NONE > ascore = 13	2	0	0	0	APSGTSLEVPIPEGLNGQK	ind_MOUSE.Tryp.TMT.REVUniprot20150423.CONTAM.fasta.hdr	21637	16835	40681	3	16837	21636	35371	16836	29889	3		0.99	21636	35371	16836	32295	3	https://kronos.stanford.edu/cgi-bin/blast_html4?Db=/seq_db/static/ind_MOUSE.Tryp.TMT.REVUniprot20150423.CONTAM.fasta.hdr&Pep=APSGTSLEVPIPEGLNGQK&MassType=0	https://kronos.stanford.edu/gfy/www/modules/show_out/show_out_wrapper.php?run_id=&search_id=&scans_id=&peptide_id=&scanf=&charge=	https://kronos.stanford.edu/gfy/www/modules/show_out/show_out_wrapper.php?run_id=&search_id=21636&scans_id=16836&peptide_id=35371&scanf=29889&charge=3	http://kronos.stanford.edu/gfy/www/modules/sdig/index.php?run_id=&search_id=21636&scans_id=16836&peptide_id=35371&scanf=29889	http:/kronos.stanford.edu/gfy/www/modules/ascore/visual/trim-phos.php?run_id=16837&search_id=21637&scans_id=16835&peptide_id=40681&charge=3	568281	0.969376	0.0575682	0.419093	0.0649959	0.0948668	6.44798
FK506-binding protein 15 OS=Mus musculus GN=Fkbp15 PE=1 SV=2	sp|Q6P9Q6|FKB15_MOUSE	346	S	SKSNSLS|79.97|EQLTVNSNPDTVK	1	SKSNSLS*EQLTVN	1	12.16	2.961	0.0004	0.3521	51.78	NO OTHERS:1	NONE > ascore = 13	1	0	0	4	SKSNSLSEQLTVNSNPDTVK	ind_MOUSE.Tryp.TMT.REVUniprot20150423.CONTAM.fasta.hdr	21636	16836	11869	3	16838	21636	11869	16836	16754	3	16838	0.99	21636	11869	16836	16754	3	https://kronos.stanford.edu/cgi-bin/blast_html4?Db=/seq_db/static/ind_MOUSE.Tryp.TMT.REVUniprot20150423.CONTAM.fasta.hdr&Pep=SKSNSLSEQLTVNSNPDTVK&MassType=0	https://kronos.stanford.edu/gfy/www/modules/show_out/show_out_wrapper.php?run_id=&search_id=&scans_id=&peptide_id=&scanf=&charge=	https://kronos.stanford.edu/gfy/www/modules/show_out/show_out_wrapper.php?run_id=16838&search_id=21636&scans_id=16836&peptide_id=11869&scanf=16754&charge=3	http://kronos.stanford.edu/gfy/www/modules/sdig/index.php?run_id=16838&search_id=21636&scans_id=16836&peptide_id=11869&scanf=16754	http:/kronos.stanford.edu/gfy/www/modules/ascore/visual/trim-phos.php?run_id=16838&search_id=21636&scans_id=16836&peptide_id=11869&charge=3	2.40662e+06	0.991134	0.0656862	0.50338	0.0781765	0.092161	6.43902
Transitional endoplasmic reticulum ATPase OS=Mus musculus GN=Vcp PE=1 SV=4	sp|Q01853|TERA_MOUSE	347	T	AHVIVMAAT|79.97|NRPNSIDPALRR	1	VIVMAAT*NRPNSI	1	5.17	2.639	0.0015	0.2486	22.86	NO OTHERS:1	NONE > ascore = 13	1	0	0	0	AHVIVMAATNRPNSIDPALRR	ind_MOUSE.Tryp.TMT.REVUniprot20150423.CONTAM.fasta.hdr	21635	16837	2959	4	16839	21635	2959	16837	11787	4	16839	0.99	21635	2959	16837	11787	4	https://kronos.stanford.edu/cgi-bin/blast_html4?Db=/seq_db/static/ind_MOUSE.Tryp.TMT.REVUniprot20150423.CONTAM.fasta.hdr&Pep=AHVIVMAATNRPNSIDPALRR&MassType=0	https://kronos.stanford.edu/gfy/www/modules/show_out/show_out_wrapper.php?run_id=&search_id=&scans_id=&peptide_id=&scanf=&charge=	https://kronos.stanford.edu/gfy/www/modules/show_out/show_out_wrapper.php?run_id=16839&search_id=21635&scans_id=16837&peptide_id=2959&scanf=11787&charge=4	http://kronos.stanford.edu/gfy/www/modules/sdig/index.php?run_id=16839&search_id=21635&scans_id=16837&peptide_id=2959&scanf=11787	http:/kronos.stanford.edu/gfy/www/modules/ascore/visual/trim-phos.php?run_id=16839&search_id=21635&scans_id=16837&peptide_id=2959&charge=4	39719.7	0.996023	0.059269	0.499363	0.0791207	0.0772359	6.31142
Sorting nexin-9 OS=Mus musculus GN=Snx9 PE=1 SV=1	sp|Q91VH2|SNX9_MOUSE	175	S	SSS|79.97|PYFKDSEPAEAGGIQR	1	DDPKSSS*PYFKDS	2	0	2.6276	0.0031	0.3781	66.98	NO OTHERS:2	NONE > ascore = 13	2	0	0	0	SSSPYFKDSEPAEAGGIQR	ind_MOUSE.Tryp.TMT.REVUniprot20150423.CONTAM.fasta.hdr	21638	16834	9761	3	16836	21638	9761	16834	15154	3	16836	0.99	21637	8014	16835	15154	3	https://kronos.stanford.edu/cgi-bin/blast_html4?Db=/seq_db/static/ind_MOUSE.Tryp.TMT.REVUniprot20150423.CONTAM.fasta.hdr&Pep=SSSPYFKDSEPAEAGGIQR&MassType=0	https://kronos.stanford.edu/gfy/www/modules/show_out/show_out_wrapper.php?run_id=&search_id=&scans_id=&peptide_id=&scanf=&charge=	https://kronos.stanford.edu/gfy/www/modules/show_out/show_out_wrapper.php?run_id=16836&search_id=21638&scans_id=16834&peptide_id=9761&scanf=15154&charge=3	http://kronos.stanford.edu/gfy/www/modules/sdig/index.php?run_id=16836&search_id=21638&scans_id=16834&peptide_id=9761&scanf=15154	http:/kronos.stanford.edu/gfy/www/modules/ascore/visual/trim-phos.php?run_id=16836&search_id=21638&scans_id=16834&peptide_id=9761&charge=3	5.2919e+06	0.994505	0.0962864	0.423844	0.0671558	0.088912	6.31135
Protein PRRC2A OS=Mus musculus GN=Prrc2a PE=1 SV=1	tr|G3UX48|G3UX48_MOUSE	72	T	RPPT|79.97|APENTPSVPSGVK	1	QPKRPPT*APENTP	1	35.28	2.1213	0.1598	0.2624	69.16	NO OTHERS:1	RPPT|79.97|APENTPSVPSGVK	1	0	0	1	RPPTAPENTPSVPSGVK	ind_MOUSE.Tryp.TMT.REVUniprot20150423.CONTAM.fasta.hdr	21634	16839	904	2	16841	21634	904	16839	10425	2	16841	0.99	21634	904	16839	10425	2	https://kronos.stanford.edu/cgi-bin/blast_html4?Db=/seq_db/static/ind_MOUSE.Tryp.TMT.REVUniprot20150423.CONTAM.fasta.hdr&Pep=RPPTAPENTPSVPSGVK&MassType=0	https://kronos.stanford.edu/gfy/www/modules/show_out/show_out_wrapper.php?run_id=&search_id=&scans_id=&peptide_id=&scanf=&charge=	https://kronos.stanford.edu/gfy/www/modules/show_out/show_out_wrapper.php?run_id=16841&search_id=21634&scans_id=16839&peptide_id=904&scanf=10425&charge=2	http://kronos.stanford.edu/gfy/www/modules/sdig/index.php?run_id=16841&search_id=21634&scans_id=16839&peptide_id=904&scanf=10425	http:/kronos.stanford.edu/gfy/www/modules/ascore/visual/trim-phos.php?run_id=16841&search_id=21634&scans_id=16839&peptide_id=904&charge=2	305809	0.972673	0.124587	0.450355	0.0716514	0.0977529	6.28537
Kinesin light chain 4 OS=Mus musculus GN=Klc4 PE=1 SV=1	sp|Q9DBS5|KLC4_MOUSE	459	S	VS|79.97|SPTVNTTLK	1	YKACRVS*SPTVNT	1	13.19	2.035	0.0151	0.3711	71.83	NO OTHERS:1	VS|79.97|SPTVNTTLK	1	0	0	0	VSSPTVNTTLK	ind_MOUSE.Tryp.TMT.REVUniprot20150423.CONTAM.fasta.hdr	21636	16836	9988	2	16838	21636	9988	16836	15644	2	16838	0.99	21636	9988	16836	15644	2	https://kronos.stanford.edu/cgi-bin/blast_html4?Db=/seq_db/static/ind_MOUSE.Tryp.TMT.REVUniprot20150423.CONTAM.fasta.hdr&Pep=VSSPTVNTTLK&MassType=0	https://kronos.stanford.edu/gfy/www/modules/show_out/show_out_wrapper.php?run_id=&search_id=&scans_id=&peptide_id=&scanf=&charge=	https://kronos.stanford.edu/gfy/www/modules/show_out/show_out_wrapper.php?run_id=16838&search_id=21636&scans_id=16836&peptide_id=9988&scanf=15644&charge=2	http://kronos.stanford.edu/gfy/www/modules/sdig/index.php?run_id=16838&search_id=21636&scans_id=16836&peptide_id=9988&scanf=15644	http:/kronos.stanford.edu/gfy/www/modules/ascore/visual/trim-phos.php?run_id=16838&search_id=21636&scans_id=16836&peptide_id=9988&charge=2	3.73311e+06	0.99782	0.0815439	0.486452	0.0780554	0.072129	6.23214
Vesicle-associated membrane protein, associated protein B and C OS=Mus musculus GN=Vapb PE=2 SV=1	tr|Q8BH80|Q8BH80_MOUSE	204	S	AMPS|79.97|NSPVAALAATGKEEGLSAR	1	VRKAMPS*NSPVAA	2	17.01	3.8455	0.0198	0.3758	96.62	NO OTHERS:2	AMPS|79.97|NSPVAALAATGKEEGLSAR	2	0	0	1	AMPSNSPVAALAATGK	ind_MOUSE.Tryp.TMT.REVUniprot20150423.CONTAM.fasta.hdr	21634	16839	31308	3	16841	21634	31308	16839	27064	3	16841	0.99	21634	31308	16839	27064	3	https://kronos.stanford.edu/cgi-bin/blast_html4?Db=/seq_db/static/ind_MOUSE.Tryp.TMT.REVUniprot20150423.CONTAM.fasta.hdr&Pep=AMPSNSPVAALAATGK&MassType=0	https://kronos.stanford.edu/gfy/www/modules/show_out/show_out_wrapper.php?run_id=&search_id=&scans_id=&peptide_id=&scanf=&charge=	https://kronos.stanford.edu/gfy/www/modules/show_out/show_out_wrapper.php?run_id=16841&search_id=21634&scans_id=16839&peptide_id=31308&scanf=27064&charge=3	http://kronos.stanford.edu/gfy/www/modules/sdig/index.php?run_id=16841&search_id=21634&scans_id=16839&peptide_id=31308&scanf=27064	http:/kronos.stanford.edu/gfy/www/modules/ascore/visual/trim-phos.php?run_id=16841&search_id=21634&scans_id=16839&peptide_id=31308&charge=3	302544	0.980231	0.0949697	0.49046	0.0793176	0.0897865	6.1835
60S acidic ribosomal protein P2 OS=Mus musculus GN=Rplp2 PE=1 SV=3	sp|P99027|RLA2_MOUSE	86	S	LASVPAGGAVAVSAAPGSAAPAAGS|79.97|APAAAEEK	1	AAPAAGS*APAAAE	9	17.63	5.167	0.0364	0.5137	127.69	NO OTHERS:7; 79:2	LASVPAGGAVAVSAAPGSAAPAAGS|79.97|APAAAEEK	7	2	0	0	LASVPAGGAVAVSAAPGSAAPAAGSAPAAAEEK	ind_MOUSE.Tryp.TMT.REVUniprot20150423.CONTAM.fasta.hdr	21635	16837	12802	3		21635	12802	16837	17448	3		0.99	21637	28251	16835	25595	3	https://kronos.stanford.edu/cgi-bin/blast_html4?Db=/seq_db/static/ind_MOUSE.Tryp.TMT.REVUniprot20150423.CONTAM.fasta.hdr&Pep=LASVPAGGAVAVSAAPGSAAPAAGSAPAAAEEK&MassType=0	https://kronos.stanford.edu/gfy/www/modules/show_out/show_out_wrapper.php?run_id=&search_id=&scans_id=&peptide_id=&scanf=&charge=	https://kronos.stanford.edu/gfy/www/modules/show_out/show_out_wrapper.php?run_id=&search_id=21635&scans_id=16837&peptide_id=12802&scanf=17448&charge=3	http://kronos.stanford.edu/gfy/www/modules/sdig/index.php?run_id=&search_id=21635&scans_id=16837&peptide_id=12802&scanf=17448	http:/kronos.stanford.edu/gfy/www/modules/ascore/visual/trim-phos.php?run_id=&search_id=21635&scans_id=16837&peptide_id=12802&charge=3	4.35389e+06	0.989457	0.0899062	0.422166	0.0682831	0.0722195	6.18259
Alkyldihydroxyacetonephosphate synthase, peroxisomal OS=Mus musculus GN=Agps PE=1 SV=1	tr|A2AL49|A2AL49_MOUSE	78	S	RAAS|79.97|AAGASPAATPAAPESGTIPK	1	KARRAAS*AAGASP	3	17.53	3.579	0.1112	0.2177	32.3	NO OTHERS:1; 83:1; 87:1	RAAS|79.97|AAGASPAATPAAPESGTIPK	1	2	0	2	AASAAGASPAATPAAPESGTIPK	ind_MOUSE.Tryp.TMT.REVUniprot20150423.CONTAM.fasta.hdr	21636	16836	2385	4	16838	21636	2385	16836	11288	4	16838	0.99	21638	20539	16834	21568	3	https://kronos.stanford.edu/cgi-bin/blast_html4?Db=/seq_db/static/ind_MOUSE.Tryp.TMT.REVUniprot20150423.CONTAM.fasta.hdr&Pep=AASAAGASPAATPAAPESGTIPK&MassType=0	https://kronos.stanford.edu/gfy/www/modules/show_out/show_out_wrapper.php?run_id=&search_id=&scans_id=&peptide_id=&scanf=&charge=	https://kronos.stanford.edu/gfy/www/modules/show_out/show_out_wrapper.php?run_id=16838&search_id=21636&scans_id=16836&peptide_id=2385&scanf=11288&charge=4	http://kronos.stanford.edu/gfy/www/modules/sdig/index.php?run_id=16838&search_id=21636&scans_id=16836&peptide_id=2385&scanf=11288	http:/kronos.stanford.edu/gfy/www/modules/ascore/visual/trim-phos.php?run_id=16838&search_id=21636&scans_id=16836&peptide_id=2385&charge=4	1.73867e+06	0.932723	0.0618189	0.401717	0.0653167	0.0794121	6.15029
RIKEN cDNA 2610206B13, isoform CRA_b OS=Mus musculus GN=Rnf219 PE=4 SV=1	tr|G3X8V5|G3X8V5_MOUSE	276	S	APS|79.97|ADSKGPNGSDELGPPK	1	LCQRAPS*ADSKGP	1	42.69	2.3357	0.0563	0.316	57.73	NO OTHERS:1	APS|79.97|ADSKGPNGSDELGPPK	1	0	0	1	APSADSKGPNGSDELGPPK	ind_MOUSE.Tryp.TMT.REVUniprot20150423.CONTAM.fasta.hdr	21637	16835	5930	3	16837	21637	5930	16835	13071	3	16837	0.99	21637	5930	16835	13071	3	https://kronos.stanford.edu/cgi-bin/blast_html4?Db=/seq_db/static/ind_MOUSE.Tryp.TMT.REVUniprot20150423.CONTAM.fasta.hdr&Pep=APSADSKGPNGSDELGPPK&MassType=0	https://kronos.stanford.edu/gfy/www/modules/show_out/show_out_wrapper.php?run_id=&search_id=&scans_id=&peptide_id=&scanf=&charge=	https://kronos.stanford.edu/gfy/www/modules/show_out/show_out_wrapper.php?run_id=16837&search_id=21637&scans_id=16835&peptide_id=5930&scanf=13071&charge=3	http://kronos.stanford.edu/gfy/www/modules/sdig/index.php?run_id=16837&search_id=21637&scans_id=16835&peptide_id=5930&scanf=13071	http:/kronos.stanford.edu/gfy/www/modules/ascore/visual/trim-phos.php?run_id=16837&search_id=21637&scans_id=16835&peptide_id=5930&charge=3	1.92874e+06	0.996086	0.0612182	0.459223	0.0760543	0.0902501	6.03809
Nuclease-sensitive element-binding protein 1 (Fragment) OS=Mus musculus GN=Ybx1 PE=1 SV=1	tr|A2BGG7|A2BGG7_MOUSE	95	S	RPQYS|79.97|NPPVQGEVMEGADNQGAGEQGRPVR	1	ARRPQYS*NPPVQG	6	24.84	5.0982	0.014	0.0697	71.77	NO OTHERS:6	RPQYS|79.97|NPPVQGEVMEGADNQGAGEQGRPVR	6	0	0	1	RPQYSNPPVQGEVMEGADNQGAGEQGRPVR	ind_MOUSE.Tryp.TMT.REVUniprot20150423.CONTAM.fasta.hdr	21639	16833	5201	4	16835	21638	904	16834	10395	4		0.99	21638	904	16834	12493	4	https://kronos.stanford.edu/cgi-bin/blast_html4?Db=/seq_db/static/ind_MOUSE.Tryp.TMT.REVUniprot20150423.CONTAM.fasta.hdr&Pep=RPQYSNPPVQGEVMEGADNQGAGEQGRPVR&MassType=0	https://kronos.stanford.edu/gfy/www/modules/show_out/show_out_wrapper.php?run_id=&search_id=&scans_id=&peptide_id=&scanf=&charge=	https://kronos.stanford.edu/gfy/www/modules/show_out/show_out_wrapper.php?run_id=&search_id=21638&scans_id=16834&peptide_id=904&scanf=10395&charge=4	http://kronos.stanford.edu/gfy/www/modules/sdig/index.php?run_id=&search_id=21638&scans_id=16834&peptide_id=904&scanf=10395	http:/kronos.stanford.edu/gfy/www/modules/ascore/visual/trim-phos.php?run_id=16835&search_id=21639&scans_id=16833&peptide_id=5201&charge=4	3.05464e+06	0.992828	0.0552781	0.494828	0.0824244	0.102913	6.00341
Isoform 5 of Formin-1 OS=Mus musculus GN=Fmn1	sp|Q05860-5|FMN1_MOUSE	396	T	ART|79.97|PETALEAFK	1	GQVKART*PETALE	1	27.05	2.2606	0.1988	0.251	45.66	NO OTHERS:1	ART|79.97|PETALEAFK	1	0	0	0	ARTPETALEAFK	ind_MOUSE.Tryp.TMT.REVUniprot20150423.CONTAM.fasta.hdr	21637	16835	22388	3	16837	21637	22388	16835	22481	3	16837	0.99	21637	22388	16835	22481	3	https://kronos.stanford.edu/cgi-bin/blast_html4?Db=/seq_db/static/ind_MOUSE.Tryp.TMT.REVUniprot20150423.CONTAM.fasta.hdr&Pep=ARTPETALEAFK&MassType=0	https://kronos.stanford.edu/gfy/www/modules/show_out/show_out_wrapper.php?run_id=&search_id=&scans_id=&peptide_id=&scanf=&charge=	https://kronos.stanford.edu/gfy/www/modules/show_out/show_out_wrapper.php?run_id=16837&search_id=21637&scans_id=16835&peptide_id=22388&scanf=22481&charge=3	http://kronos.stanford.edu/gfy/www/modules/sdig/index.php?run_id=16837&search_id=21637&scans_id=16835&peptide_id=22388&scanf=22481	http:/kronos.stanford.edu/gfy/www/modules/ascore/visual/trim-phos.php?run_id=16837&search_id=21637&scans_id=16835&peptide_id=22388&charge=3	588404	0.993422	0.0471365	0.534718	0.0892945	0.0635955	5.98825
Proteasome activator complex subunit 3 OS=Mus musculus GN=Psme3 PE=1 SV=1	sp|P61290|PSME3_MOUSE	247	S	S|79.97|SNAETLY	1	KIKRPRS*SNAETL	1	0	1.533	0.0426	0.4707	24.69	NO OTHERS:1	NONE > ascore = 13	1	0	0	0	SSNAETLY	ind_MOUSE.Tryp.TMT.REVUniprot20150423.CONTAM.fasta.hdr	21639	16833	22640	2	16835	21639	22640	16833	21614	2	16835	0.99	21639	22640	16833	21614	2	https://kronos.stanford.edu/cgi-bin/blast_html4?Db=/seq_db/static/ind_MOUSE.Tryp.TMT.REVUniprot20150423.CONTAM.fasta.hdr&Pep=SSNAETLY&MassType=0	https://kronos.stanford.edu/gfy/www/modules/show_out/show_out_wrapper.php?run_id=&search_id=&scans_id=&peptide_id=&scanf=&charge=	https://kronos.stanford.edu/gfy/www/modules/show_out/show_out_wrapper.php?run_id=16835&search_id=21639&scans_id=16833&peptide_id=22640&scanf=21614&charge=2	http://kronos.stanford.edu/gfy/www/modules/sdig/index.php?run_id=16835&search_id=21639&scans_id=16833&peptide_id=22640&scanf=21614	http:/kronos.stanford.edu/gfy/www/modules/ascore/visual/trim-phos.php?run_id=16835&search_id=21639&scans_id=16833&peptide_id=22640&charge=2	210420	0.922601	0.0649498	0.408155	0.0682783	0.0489569	5.97782
WASH complex subunit FAM21 OS=Mus musculus GN=Fam21 PE=1 SV=1	sp|Q6PGL7|FAM21_MOUSE	832	S	S|79.97|TGVFQDEELLFSHK	1	TDSRPKS*TGVFQD	6	0	4.6334	0.0192	0.5315	116.02	NO OTHERS:6	NONE > ascore = 13	6	0	0	1	STGVFQDEELLFSHK	ind_MOUSE.Tryp.TMT.REVUniprot20150423.CONTAM.fasta.hdr	21638	16834	47310	3	16836	21638	47310	16834	35892	3	16836	0.99	21638	47310	16834	35892	3	https://kronos.stanford.edu/cgi-bin/blast_html4?Db=/seq_db/static/ind_MOUSE.Tryp.TMT.REVUniprot20150423.CONTAM.fasta.hdr&Pep=STGVFQDEELLFSHK&MassType=0	https://kronos.stanford.edu/gfy/www/modules/show_out/show_out_wrapper.php?run_id=&search_id=&scans_id=&peptide_id=&scanf=&charge=	https://kronos.stanford.edu/gfy/www/modules/show_out/show_out_wrapper.php?run_id=16836&search_id=21638&scans_id=16834&peptide_id=47310&scanf=35892&charge=3	http://kronos.stanford.edu/gfy/www/modules/sdig/index.php?run_id=16836&search_id=21638&scans_id=16834&peptide_id=47310&scanf=35892	http:/kronos.stanford.edu/gfy/www/modules/ascore/visual/trim-phos.php?run_id=16836&search_id=21638&scans_id=16834&peptide_id=47310&charge=3	3.45915e+06	0.860113	0.0772587	0.344339	0.0579197	0.0977062	5.94511
Leucine-rich repeat-containing protein 58 OS=Mus musculus GN=Lrrc58 PE=2 SV=1	sp|Q3UGP9|LRC58_MOUSE	19	S	LSVS|79.97|AEALESELEAR	1	WSRLSVS*AEALES	2	17.01	2.7718	0.1038	0.4394	53.95	NO OTHERS:2	LSVS|79.97|AEALESELEAR	2	0	0	0	LSVSAEALESELEAR	ind_MOUSE.Tryp.TMT.REVUniprot20150423.CONTAM.fasta.hdr	21639	16833	48765	2	16835	21639	48765	16833	35555	2	16835	0.99	21639	48765	16833	35555	2	https://kronos.stanford.edu/cgi-bin/blast_html4?Db=/seq_db/static/ind_MOUSE.Tryp.TMT.REVUniprot20150423.CONTAM.fasta.hdr&Pep=LSVSAEALESELEAR&MassType=0	https://kronos.stanford.edu/gfy/www/modules/show_out/show_out_wrapper.php?run_id=&search_id=&scans_id=&peptide_id=&scanf=&charge=	https://kronos.stanford.edu/gfy/www/modules/show_out/show_out_wrapper.php?run_id=16835&search_id=21639&scans_id=16833&peptide_id=48765&scanf=35555&charge=2	http://kronos.stanford.edu/gfy/www/modules/sdig/index.php?run_id=16835&search_id=21639&scans_id=16833&peptide_id=48765&scanf=35555	http:/kronos.stanford.edu/gfy/www/modules/ascore/visual/trim-phos.php?run_id=16835&search_id=21639&scans_id=16833&peptide_id=48765&charge=2	628318	0.948262	0.0615146	0.546454	0.0920271	0.116685	5.93796
Myotubularin-related protein 5 OS=Mus musculus GN=Sbf1 PE=4 SV=1	tr|D6RG52|D6RG52_MOUSE	117	S	LS|79.97|STAPAQPGQLFAPK	1	GGQARLS*STAPAQ	1	7.76	2.8017	0.0471	0.311	63.01	NO OTHERS:1	NONE > ascore = 13	1	0	0	3	LSSTAPAQPGQLFAPK	ind_MOUSE.Tryp.TMT.REVUniprot20150423.CONTAM.fasta.hdr	21634	16839	28056	3	16841	21634	28056	16839	25204	3	16841	0.99	21634	28056	16839	25204	3	https://kronos.stanford.edu/cgi-bin/blast_html4?Db=/seq_db/static/ind_MOUSE.Tryp.TMT.REVUniprot20150423.CONTAM.fasta.hdr&Pep=LSSTAPAQPGQLFAPK&MassType=0	https://kronos.stanford.edu/gfy/www/modules/show_out/show_out_wrapper.php?run_id=&search_id=&scans_id=&peptide_id=&scanf=&charge=	https://kronos.stanford.edu/gfy/www/modules/show_out/show_out_wrapper.php?run_id=16841&search_id=21634&scans_id=16839&peptide_id=28056&scanf=25204&charge=3	http://kronos.stanford.edu/gfy/www/modules/sdig/index.php?run_id=16841&search_id=21634&scans_id=16839&peptide_id=28056&scanf=25204	http:/kronos.stanford.edu/gfy/www/modules/ascore/visual/trim-phos.php?run_id=16841&search_id=21634&scans_id=16839&peptide_id=28056&charge=3	264607	0.991058	0.0804482	0.419379	0.0708593	0.111986	5.91847
Calcium homeostasis endoplasmic reticulum protein OS=Mus musculus GN=Cherp PE=1 SV=1	tr|G5E8I8|G5E8I8_MOUSE	868	S	MGWSGS|79.97|GGLGAK	1	KMGWSGS*GGLGAK	1	18.87	1.8313	0.0265	0.2288	52.41	NO OTHERS:1	MGWSGS|79.97|GGLGAK	1	0	0	1	MGWSGSGGLGAK	ind_MOUSE.Tryp.TMT.REVUniprot20150423.CONTAM.fasta.hdr	21634	16839	18075	2	16841	21634	18075	16839	19924	2	16841	0.99	21634	18075	16839	19924	2	https://kronos.stanford.edu/cgi-bin/blast_html4?Db=/seq_db/static/ind_MOUSE.Tryp.TMT.REVUniprot20150423.CONTAM.fasta.hdr&Pep=MGWSGSGGLGAK&MassType=0	https://kronos.stanford.edu/gfy/www/modules/show_out/show_out_wrapper.php?run_id=&search_id=&scans_id=&peptide_id=&scanf=&charge=	https://kronos.stanford.edu/gfy/www/modules/show_out/show_out_wrapper.php?run_id=16841&search_id=21634&scans_id=16839&peptide_id=18075&scanf=19924&charge=2	http://kronos.stanford.edu/gfy/www/modules/sdig/index.php?run_id=16841&search_id=21634&scans_id=16839&peptide_id=18075&scanf=19924	http:/kronos.stanford.edu/gfy/www/modules/ascore/visual/trim-phos.php?run_id=16841&search_id=21634&scans_id=16839&peptide_id=18075&charge=2	1.55227e+06	0.939951	0.0753446	0.379264	0.0650911	0.10324	5.82666
26S protease regulatory subunit 6A OS=Mus musculus GN=Psmc3 PE=3 SV=1	tr|A2AGN7|A2AGN7_MOUSE	337	S	KMNVS|79.97|PDVNYEELAR	1	SRKMNVS*PDVNYE	1	40.65	2.7491	0.1611	0.3136	63.59	NO OTHERS:1	KMNVS|79.97|PDVNYEELAR	1	0	0	2	KMNVSPDVNYEELAR	ind_MOUSE.Tryp.TMT.REVUniprot20150423.CONTAM.fasta.hdr	21637	16835	20277	3	16837	21637	20277	16835	21336	3	16837	0.99	21637	20277	16835	21336	3	https://kronos.stanford.edu/cgi-bin/blast_html4?Db=/seq_db/static/ind_MOUSE.Tryp.TMT.REVUniprot20150423.CONTAM.fasta.hdr&Pep=KMNVSPDVNYEELAR&MassType=0	https://kronos.stanford.edu/gfy/www/modules/show_out/show_out_wrapper.php?run_id=&search_id=&scans_id=&peptide_id=&scanf=&charge=	https://kronos.stanford.edu/gfy/www/modules/show_out/show_out_wrapper.php?run_id=16837&search_id=21637&scans_id=16835&peptide_id=20277&scanf=21336&charge=3	http://kronos.stanford.edu/gfy/www/modules/sdig/index.php?run_id=16837&search_id=21637&scans_id=16835&peptide_id=20277&scanf=21336	http:/kronos.stanford.edu/gfy/www/modules/ascore/visual/trim-phos.php?run_id=16837&search_id=21637&scans_id=16835&peptide_id=20277&charge=3	732344	0.849823	0.0511042	0.349378	0.0601409	0.103872	5.80933
Phosphatidylinositol 3,4,5-trisphosphate 5-phosphatase 2 OS=Mus musculus GN=Inppl1 PE=1 SV=1	sp|Q6P549|SHIP2_MOUSE	1166	S	GPSDYGRPLS|79.97|FPPPR	1	DYGRPLS*FPPPRI	2	23.15	2.2826	0.2624	0.3607	34.76	NO OTHERS:2	GPSDYGRPLS|79.97|FPPPR	2	0	0	0	GPSDYGRPLSFPPPR	ind_MOUSE.Tryp.TMT.REVUniprot20150423.CONTAM.fasta.hdr	21636	16836	11334	3	16838	21636	11334	16836	16440	3	16838	0.99	21636	11334	16836	16440	3	https://kronos.stanford.edu/cgi-bin/blast_html4?Db=/seq_db/static/ind_MOUSE.Tryp.TMT.REVUniprot20150423.CONTAM.fasta.hdr&Pep=GPSDYGRPLSFPPPR&MassType=0	https://kronos.stanford.edu/gfy/www/modules/show_out/show_out_wrapper.php?run_id=&search_id=&scans_id=&peptide_id=&scanf=&charge=	https://kronos.stanford.edu/gfy/www/modules/show_out/show_out_wrapper.php?run_id=16838&search_id=21636&scans_id=16836&peptide_id=11334&scanf=16440&charge=3	http://kronos.stanford.edu/gfy/www/modules/sdig/index.php?run_id=16838&search_id=21636&scans_id=16836&peptide_id=11334&scanf=16440	http:/kronos.stanford.edu/gfy/www/modules/ascore/visual/trim-phos.php?run_id=16838&search_id=21636&scans_id=16836&peptide_id=11334&charge=3	1.57369e+06	0.754219	0.0430742	0.325366	0.0561986	0.250152	5.78957
Centrosomal protein of 170 kDa protein B OS=Mus musculus GN=Cep170b PE=1 SV=2	sp|Q80U49|C170B_MOUSE	709	S	ADS|79.97|PAGLEAAR	1	PSGRADS*PAGLEA	1	1000	1.8549	0.4123	0.4123	38.2	NO OTHERS:1	ADS|79.97|PAGLEAAR	1	0	0	0	ADSPAGLEAAR	ind_MOUSE.Tryp.TMT.REVUniprot20150423.CONTAM.fasta.hdr	21639	16833	3605	2	16835	21639	3605	16833	11703	2	16835	0.99	21639	3605	16833	11703	2	https://kronos.stanford.edu/cgi-bin/blast_html4?Db=/seq_db/static/ind_MOUSE.Tryp.TMT.REVUniprot20150423.CONTAM.fasta.hdr&Pep=ADSPAGLEAAR&MassType=0	https://kronos.stanford.edu/gfy/www/modules/show_out/show_out_wrapper.php?run_id=&search_id=&scans_id=&peptide_id=&scanf=&charge=	https://kronos.stanford.edu/gfy/www/modules/show_out/show_out_wrapper.php?run_id=16835&search_id=21639&scans_id=16833&peptide_id=3605&scanf=11703&charge=2	http://kronos.stanford.edu/gfy/www/modules/sdig/index.php?run_id=16835&search_id=21639&scans_id=16833&peptide_id=3605&scanf=11703	http:/kronos.stanford.edu/gfy/www/modules/ascore/visual/trim-phos.php?run_id=16835&search_id=21639&scans_id=16833&peptide_id=3605&charge=2	4.34027e+06	0.735218	0.0679299	0.294538	0.0509082	0.214418	5.78566
Rho GTPase-activating protein 5 OS=Mus musculus GN=Arhgap5 PE=1 SV=1	tr|E9PYT0|E9PYT0_MOUSE	765	S	HNLDVVS|79.97|PVPINK	1	HNLDVVS*PVPINK	3	1000	3.5771	0.2924	0.2924	68.38	NO OTHERS:3	HNLDVVS|79.97|PVPINK, HNLDVVS|79.97|PVPINKDVSEADLR	3	0	0	1	HNLDVVSPVPINK	ind_MOUSE.Tryp.TMT.REVUniprot20150423.CONTAM.fasta.hdr	21637	16835	18843	3	16837	21637	22667	16835	22633	4	16837	0.99	21637	22667	16835	22633	4	https://kronos.stanford.edu/cgi-bin/blast_html4?Db=/seq_db/static/ind_MOUSE.Tryp.TMT.REVUniprot20150423.CONTAM.fasta.hdr&Pep=HNLDVVSPVPINK&MassType=0	https://kronos.stanford.edu/gfy/www/modules/show_out/show_out_wrapper.php?run_id=&search_id=&scans_id=&peptide_id=&scanf=&charge=	https://kronos.stanford.edu/gfy/www/modules/show_out/show_out_wrapper.php?run_id=16837&search_id=21637&scans_id=16835&peptide_id=22667&scanf=22633&charge=4	http://kronos.stanford.edu/gfy/www/modules/sdig/index.php?run_id=16837&search_id=21637&scans_id=16835&peptide_id=22667&scanf=22633	http:/kronos.stanford.edu/gfy/www/modules/ascore/visual/trim-phos.php?run_id=16837&search_id=21637&scans_id=16835&peptide_id=18843&charge=3	1.8029e+06	0.953791	0.0747037	0.384194	0.0666157	0.104931	5.76732
Catenin delta-1 OS=Mus musculus GN=Ctnnd1 PE=1 SV=1	tr|D3Z2H2|D3Z2H2_MOUSE	198	S	APS|79.97|RQDVYGPQPQVR	1	EGYRAPS*RQDVYG	2	88.44	2.8781	0.3623	0.4938	86.91	NO OTHERS:2	APS|79.97|RQDVYGPQPQVR	2	0	0	17	APSRQDVYGPQPQVR	ind_MOUSE.Tryp.TMT.REVUniprot20150423.CONTAM.fasta.hdr	21638	16834	82328	2	16836	21637	80165	16835	7676	3		0.99	21638	82328	16834	7855	2	https://kronos.stanford.edu/cgi-bin/blast_html4?Db=/seq_db/static/ind_MOUSE.Tryp.TMT.REVUniprot20150423.CONTAM.fasta.hdr&Pep=APSRQDVYGPQPQVR&MassType=0	https://kronos.stanford.edu/gfy/www/modules/show_out/show_out_wrapper.php?run_id=&search_id=&scans_id=&peptide_id=&scanf=&charge=	https://kronos.stanford.edu/gfy/www/modules/show_out/show_out_wrapper.php?run_id=&search_id=21637&scans_id=16835&peptide_id=80165&scanf=7676&charge=3	http://kronos.stanford.edu/gfy/www/modules/sdig/index.php?run_id=&search_id=21637&scans_id=16835&peptide_id=80165&scanf=7676	http:/kronos.stanford.edu/gfy/www/modules/ascore/visual/trim-phos.php?run_id=16836&search_id=21638&scans_id=16834&peptide_id=82328&charge=2	8.63834e+06	0.927499	0.11386	0.380128	0.0665324	0.0780935	5.71343
Protein Tns1 (Fragment) OS=Mus musculus GN=Tns1 PE=1 SV=1	tr|A0A087WQ94|A0A087WQ94_MOUSE	685	T	SKPSPQLSAET|79.97|PVAALPEFPR	1	PQLSAET*PVAALP	1	3.51	3.1033	0.0494	0.4356	32.84	NO OTHERS:1	NONE > ascore = 13	1	0	0	4	SKPSPQLSAETPVAALPEFPR	ind_MOUSE.Tryp.TMT.REVUniprot20150423.CONTAM.fasta.hdr	21634	16839	35372	3	16841	21634	35372	16839	29347	3	16841	0.99	21634	35372	16839	29347	3	https://kronos.stanford.edu/cgi-bin/blast_html4?Db=/seq_db/static/ind_MOUSE.Tryp.TMT.REVUniprot20150423.CONTAM.fasta.hdr&Pep=SKPSPQLSAETPVAALPEFPR&MassType=0	https://kronos.stanford.edu/gfy/www/modules/show_out/show_out_wrapper.php?run_id=&search_id=&scans_id=&peptide_id=&scanf=&charge=	https://kronos.stanford.edu/gfy/www/modules/show_out/show_out_wrapper.php?run_id=16841&search_id=21634&scans_id=16839&peptide_id=35372&scanf=29347&charge=3	http://kronos.stanford.edu/gfy/www/modules/sdig/index.php?run_id=16841&search_id=21634&scans_id=16839&peptide_id=35372&scanf=29347	http:/kronos.stanford.edu/gfy/www/modules/ascore/visual/trim-phos.php?run_id=16841&search_id=21634&scans_id=16839&peptide_id=35372&charge=3	521179	0.988474	0.124648	0.390546	0.0684014	0.101409	5.70963
Microtubule-associated protein 1B OS=Mus musculus GN=Map1b PE=1 SV=2	sp|P14873|MAP1B_MOUSE	1401	S	VLSPLRSPPLLGS|79.97|ES|79.97|PYEDFLSADSK	1	SPPLLGS*ESPYED	1	14.31	3.2793	0.0072	0.3061	49.9	58 days, 11:01:00	VLSPLRSPPLLGS|79.97|ES|79.97|PYEDFLSADSK	0	1	0	0	VLSPLRSPPLLGSESPYEDFLSADSK	ind_MOUSE.Tryp.TMT.REVUniprot20150423.CONTAM.fasta.hdr	21636	16836	60870	3	16838	21636	60870	16836	43656	3	16838	0.99	21636	60870	16836	43656	3	https://kronos.stanford.edu/cgi-bin/blast_html4?Db=/seq_db/static/ind_MOUSE.Tryp.TMT.REVUniprot20150423.CONTAM.fasta.hdr&Pep=VLSPLRSPPLLGSESPYEDFLSADSK&MassType=0	https://kronos.stanford.edu/gfy/www/modules/show_out/show_out_wrapper.php?run_id=&search_id=&scans_id=&peptide_id=&scanf=&charge=	https://kronos.stanford.edu/gfy/www/modules/show_out/show_out_wrapper.php?run_id=16838&search_id=21636&scans_id=16836&peptide_id=60870&scanf=43656&charge=3	http://kronos.stanford.edu/gfy/www/modules/sdig/index.php?run_id=16838&search_id=21636&scans_id=16836&peptide_id=60870&scanf=43656	http:/kronos.stanford.edu/gfy/www/modules/ascore/visual/trim-phos.php?run_id=16838&search_id=21636&scans_id=16836&peptide_id=60870&charge=3	163104	0.924458	0.132849	0.386505	0.0677555	0.150784	5.7044
SH3 domain-containing kinase-binding protein 1 OS=Mus musculus GN=Sh3kbp1 PE=1 SV=1	tr|E9Q0C1|E9Q0C1_MOUSE	12	T	APSPT|79.97|DLPESEIKK	1	AKAPSPT*DLPESE	2	17.95	3.2265	0.0003	0.4346	64.86	NO OTHERS:2	APSPT|79.97|DLPESEIKK	2	0	0	1	APSPTDLPESEIKK	ind_MOUSE.Tryp.TMT.REVUniprot20150423.CONTAM.fasta.hdr	21638	16834	18010	3	16836	21637	15866	16835	18883	3		0.99	21637	15866	16835	20151	3	https://kronos.stanford.edu/cgi-bin/blast_html4?Db=/seq_db/static/ind_MOUSE.Tryp.TMT.REVUniprot20150423.CONTAM.fasta.hdr&Pep=APSPTDLPESEIKK&MassType=0	https://kronos.stanford.edu/gfy/www/modules/show_out/show_out_wrapper.php?run_id=&search_id=&scans_id=&peptide_id=&scanf=&charge=	https://kronos.stanford.edu/gfy/www/modules/show_out/show_out_wrapper.php?run_id=&search_id=21637&scans_id=16835&peptide_id=15866&scanf=18883&charge=3	http://kronos.stanford.edu/gfy/www/modules/sdig/index.php?run_id=&search_id=21637&scans_id=16835&peptide_id=15866&scanf=18883	http:/kronos.stanford.edu/gfy/www/modules/ascore/visual/trim-phos.php?run_id=16836&search_id=21638&scans_id=16834&peptide_id=18010&charge=3	1.462e+07	0.901341	0.0585066	0.387183	0.0679673	0.0753584	5.69661
Protein Tns1 (Fragment) OS=Mus musculus GN=Tns1 PE=1 SV=1	tr|A0A087WQ94|A0A087WQ94_MOUSE	1385	S	AGS|79.97|LPNYATINGK	1	VGDRAGS*LPNYAT	3	42.34	2.1518	0.1028	0.2339	71.18	NO OTHERS:3	AGS|79.97|LPNYATINGK	3	0	0	5	AGSLPNYATINGK	ind_MOUSE.Tryp.TMT.REVUniprot20150423.CONTAM.fasta.hdr	21636	16836	18850	2		21637	22580	16835	22583	3	16837	0.99	21634	15587	16839	22583	2	https://kronos.stanford.edu/cgi-bin/blast_html4?Db=/seq_db/static/ind_MOUSE.Tryp.TMT.REVUniprot20150423.CONTAM.fasta.hdr&Pep=AGSLPNYATINGK&MassType=0	https://kronos.stanford.edu/gfy/www/modules/show_out/show_out_wrapper.php?run_id=&search_id=&scans_id=&peptide_id=&scanf=&charge=	https://kronos.stanford.edu/gfy/www/modules/show_out/show_out_wrapper.php?run_id=16837&search_id=21637&scans_id=16835&peptide_id=22580&scanf=22583&charge=3	http://kronos.stanford.edu/gfy/www/modules/sdig/index.php?run_id=16837&search_id=21637&scans_id=16835&peptide_id=22580&scanf=22583	http:/kronos.stanford.edu/gfy/www/modules/ascore/visual/trim-phos.php?run_id=&search_id=21636&scans_id=16836&peptide_id=18850&charge=2	4.47905e+06	0.997937	0.0885287	0.441653	0.077616	0.0866233	5.69023
RNA-binding protein 27 OS=Mus musculus GN=Rbm27 PE=2 SV=3	sp|Q5SFM8|RBM27_MOUSE	447	T	LQLGT|79.97|PPPLLAAR	1	ERLQLGT*PPPLLA	2	1000	1.6592	0.3798	0.3798	38.16	NO OTHERS:2	LQLGT|79.97|PPPLLAAR	2	0	0	1	LQLGTPPPLLAAR	ind_MOUSE.Tryp.TMT.REVUniprot20150423.CONTAM.fasta.hdr	21636	16836	42076	2	16838	21634	40820	16839	32298	2		0.99	21634	40820	16839	33612	2	https://kronos.stanford.edu/cgi-bin/blast_html4?Db=/seq_db/static/ind_MOUSE.Tryp.TMT.REVUniprot20150423.CONTAM.fasta.hdr&Pep=LQLGTPPPLLAAR&MassType=0	https://kronos.stanford.edu/gfy/www/modules/show_out/show_out_wrapper.php?run_id=&search_id=&scans_id=&peptide_id=&scanf=&charge=	https://kronos.stanford.edu/gfy/www/modules/show_out/show_out_wrapper.php?run_id=&search_id=21634&scans_id=16839&peptide_id=40820&scanf=32298&charge=2	http://kronos.stanford.edu/gfy/www/modules/sdig/index.php?run_id=&search_id=21634&scans_id=16839&peptide_id=40820&scanf=32298	http:/kronos.stanford.edu/gfy/www/modules/ascore/visual/trim-phos.php?run_id=16838&search_id=21636&scans_id=16836&peptide_id=42076&charge=2	1.17384e+06	0.968238	0.097441	0.394129	0.0693881	0.0643608	5.68006
Beta-2-syntrophin OS=Mus musculus GN=Sntb2 PE=1 SV=2	sp|Q61235|SNTB2_MOUSE	373	S	S|79.97|PSLGSDLTFATR	1	SGSGCRS*PSLGSD	2	28.87	2.2653	0.1661	0.2942	86.77	NO OTHERS:2	S|79.97|PSLGSDLTFATR	2	0	0	0	SPSLGSDLTFATR	ind_MOUSE.Tryp.TMT.REVUniprot20150423.CONTAM.fasta.hdr	21637	16835	30624	2	16837	21636	27148	16836	25321	2		0.99	21637	30624	16835	26856	2	https://kronos.stanford.edu/cgi-bin/blast_html4?Db=/seq_db/static/ind_MOUSE.Tryp.TMT.REVUniprot20150423.CONTAM.fasta.hdr&Pep=SPSLGSDLTFATR&MassType=0	https://kronos.stanford.edu/gfy/www/modules/show_out/show_out_wrapper.php?run_id=&search_id=&scans_id=&peptide_id=&scanf=&charge=	https://kronos.stanford.edu/gfy/www/modules/show_out/show_out_wrapper.php?run_id=&search_id=21636&scans_id=16836&peptide_id=27148&scanf=25321&charge=2	http://kronos.stanford.edu/gfy/www/modules/sdig/index.php?run_id=&search_id=21636&scans_id=16836&peptide_id=27148&scanf=25321	http:/kronos.stanford.edu/gfy/www/modules/ascore/visual/trim-phos.php?run_id=16837&search_id=21637&scans_id=16835&peptide_id=30624&charge=2	4.32807e+06	0.993603	0.0705472	0.438167	0.0772033	0.117	5.6755
Protein flightless-1 homolog OS=Mus musculus GN=Flii PE=1 SV=1	sp|Q9JJ28|FLII_MOUSE	409	T	LAGASPAT|79.97|VAAAAAVGSGSKDPLAR	1	AGASPAT*VAAAAA	2	13.49	3.3764	0.0151	0.5063	43.63	NO OTHERS:2	LAGASPAT|79.97|VAAAAAVGSGSKDPLAR	2	0	0	0	LAGASPATVAAAAAVGSGSKDPLAR	ind_MOUSE.Tryp.TMT.REVUniprot20150423.CONTAM.fasta.hdr	21634	16839	31754	2		21635	20389	16837	21851	3	16839	0.99	21635	20389	16837	21851	3	https://kronos.stanford.edu/cgi-bin/blast_html4?Db=/seq_db/static/ind_MOUSE.Tryp.TMT.REVUniprot20150423.CONTAM.fasta.hdr&Pep=LAGASPATVAAAAAVGSGSKDPLAR&MassType=0	https://kronos.stanford.edu/gfy/www/modules/show_out/show_out_wrapper.php?run_id=&search_id=&scans_id=&peptide_id=&scanf=&charge=	https://kronos.stanford.edu/gfy/www/modules/show_out/show_out_wrapper.php?run_id=16839&search_id=21635&scans_id=16837&peptide_id=20389&scanf=21851&charge=3	http://kronos.stanford.edu/gfy/www/modules/sdig/index.php?run_id=16839&search_id=21635&scans_id=16837&peptide_id=20389&scanf=21851	http:/kronos.stanford.edu/gfy/www/modules/ascore/visual/trim-phos.php?run_id=&search_id=21634&scans_id=16839&peptide_id=31754&charge=2	325708	0.983568	0.0737165	0.41662	0.0737482	0.0864563	5.64923
Multivesicular body subunit 12A OS=Mus musculus GN=Mvb12a PE=1 SV=1	sp|Q78HU3|MB12A_MOUSE	168	S	GLS|79.97|LDPPKEPSK	1	QDMRGLS*LDPPKE	1	51.14	2.7835	0.262	0.262	39.65	NO OTHERS:1	GLS|79.97|LDPPKEPSK	1	0	0	0	GLSLDPPKEPSK	ind_MOUSE.Tryp.TMT.REVUniprot20150423.CONTAM.fasta.hdr	21637	16835	15982	3	16837	21637	15982	16835	18951	3	16837	0.99	21637	15982	16835	18951	3	https://kronos.stanford.edu/cgi-bin/blast_html4?Db=/seq_db/static/ind_MOUSE.Tryp.TMT.REVUniprot20150423.CONTAM.fasta.hdr&Pep=GLSLDPPKEPSK&MassType=0	https://kronos.stanford.edu/gfy/www/modules/show_out/show_out_wrapper.php?run_id=&search_id=&scans_id=&peptide_id=&scanf=&charge=	https://kronos.stanford.edu/gfy/www/modules/show_out/show_out_wrapper.php?run_id=16837&search_id=21637&scans_id=16835&peptide_id=15982&scanf=18951&charge=3	http://kronos.stanford.edu/gfy/www/modules/sdig/index.php?run_id=16837&search_id=21637&scans_id=16835&peptide_id=15982&scanf=18951	http:/kronos.stanford.edu/gfy/www/modules/ascore/visual/trim-phos.php?run_id=16837&search_id=21637&scans_id=16835&peptide_id=15982&charge=3	2.1963e+06	0.98174	0.0923764	0.381376	0.0681353	0.104051	5.59732
Vinculin OS=Mus musculus GN=Vcl PE=1 SV=4	sp|Q64727|VINC_MOUSE	346	S	GQGAS|79.97|PVAMQK	1	ARGQGAS*PVAMQK	6	1000	2.2531	0.3423	0.3423	53.75	NO OTHERS:6	ARGQGAS|79.97|PVAMQK, GQGAS|79.97|PVAMQK	6	0	0	0	GQGASPVAMQK	ind_MOUSE.Tryp.TMT.REVUniprot20150423.CONTAM.fasta.hdr	21638	16834	3800	3	16836	21638	3800	16834	11918	3	16836	0.99	21638	3800	16834	11918	3	https://kronos.stanford.edu/cgi-bin/blast_html4?Db=/seq_db/static/ind_MOUSE.Tryp.TMT.REVUniprot20150423.CONTAM.fasta.hdr&Pep=GQGASPVAMQK&MassType=0	https://kronos.stanford.edu/gfy/www/modules/show_out/show_out_wrapper.php?run_id=&search_id=&scans_id=&peptide_id=&scanf=&charge=	https://kronos.stanford.edu/gfy/www/modules/show_out/show_out_wrapper.php?run_id=16836&search_id=21638&scans_id=16834&peptide_id=3800&scanf=11918&charge=3	http://kronos.stanford.edu/gfy/www/modules/sdig/index.php?run_id=16836&search_id=21638&scans_id=16834&peptide_id=3800&scanf=11918	http:/kronos.stanford.edu/gfy/www/modules/ascore/visual/trim-phos.php?run_id=16836&search_id=21638&scans_id=16834&peptide_id=3800&charge=3	2.21426e+07	0.901704	0.0786333	0.377293	0.0678486	0.0670517	5.56081
General transcription factor 3C polypeptide 4 OS=Mus musculus GN=Gtf3c4 PE=4 SV=1	tr|E9Q2B0|E9Q2B0_MOUSE	383	S	TFEEAAAQLLES|79.97|SVQNLFK	1	AAQLLES*SVQNLF	1	10.33	2.2643	0.1133	0.2341	21.52	NO OTHERS:1	NONE > ascore = 13	1	0	0	2	TFEEAAAQLLESSVQNLFK	ind_MOUSE.Tryp.TMT.REVUniprot20150423.CONTAM.fasta.hdr	21638	16834	14610	3	16836	21638	14610	16834	18127	3	16836	0.99	21638	14610	16834	18127	3	https://kronos.stanford.edu/cgi-bin/blast_html4?Db=/seq_db/static/ind_MOUSE.Tryp.TMT.REVUniprot20150423.CONTAM.fasta.hdr&Pep=TFEEAAAQLLESSVQNLFK&MassType=0	https://kronos.stanford.edu/gfy/www/modules/show_out/show_out_wrapper.php?run_id=&search_id=&scans_id=&peptide_id=&scanf=&charge=	https://kronos.stanford.edu/gfy/www/modules/show_out/show_out_wrapper.php?run_id=16836&search_id=21638&scans_id=16834&peptide_id=14610&scanf=18127&charge=3	http://kronos.stanford.edu/gfy/www/modules/sdig/index.php?run_id=16836&search_id=21638&scans_id=16834&peptide_id=14610&scanf=18127	http:/kronos.stanford.edu/gfy/www/modules/ascore/visual/trim-phos.php?run_id=16836&search_id=21638&scans_id=16834&peptide_id=14610&charge=3	1.73745e+06	0.991061	0.0775489	0.441912	0.079733	0.108004	5.54239
Coatomer subunit alpha OS=Mus musculus GN=Copa PE=1 SV=1	tr|F8WHL2|F8WHL2_MOUSE	179	S	KNLSPGAVES|79.97|DVR	1	SPGAVES*DVRGIT	1	40.07	2.3413	0.1367	0.2488	41.72	NO OTHERS:1	KNLSPGAVES|79.97|DVR	1	0	0	1	KNLSPGAVESDVR	ind_MOUSE.Tryp.TMT.REVUniprot20150423.CONTAM.fasta.hdr	21638	16834	10356	3	16836	21638	10356	16834	15508	3	16836	0.99	21638	10356	16834	15508	3	https://kronos.stanford.edu/cgi-bin/blast_html4?Db=/seq_db/static/ind_MOUSE.Tryp.TMT.REVUniprot20150423.CONTAM.fasta.hdr&Pep=KNLSPGAVESDVR&MassType=0	https://kronos.stanford.edu/gfy/www/modules/show_out/show_out_wrapper.php?run_id=&search_id=&scans_id=&peptide_id=&scanf=&charge=	https://kronos.stanford.edu/gfy/www/modules/show_out/show_out_wrapper.php?run_id=16836&search_id=21638&scans_id=16834&peptide_id=10356&scanf=15508&charge=3	http://kronos.stanford.edu/gfy/www/modules/sdig/index.php?run_id=16836&search_id=21638&scans_id=16834&peptide_id=10356&scanf=15508	http:/kronos.stanford.edu/gfy/www/modules/ascore/visual/trim-phos.php?run_id=16836&search_id=21638&scans_id=16834&peptide_id=10356&charge=3	1.24207e+06	0.941902	0.0527598	0.403323	0.072802	0.090884	5.54001
LIM domain-containing protein 1 OS=Mus musculus GN=Limd1 PE=1 SV=2	sp|Q9QXD8|LIMD1_MOUSE	659	S	GPS|79.97|PAPLHQHHF	1	RLEKGPS*PAPLHQ	1	1000	2.2403	0.5097	0.5097	54.34	NO OTHERS:1	GPS|79.97|PAPLHQHHF	1	0	0	0	GPSPAPLHQHHF	ind_MOUSE.Tryp.TMT.REVUniprot20150423.CONTAM.fasta.hdr	21637	16835	79751	3	16837	21637	79751	16835	7442	3	16837	0.99	21637	79751	16835	7442	3	https://kronos.stanford.edu/cgi-bin/blast_html4?Db=/seq_db/static/ind_MOUSE.Tryp.TMT.REVUniprot20150423.CONTAM.fasta.hdr&Pep=GPSPAPLHQHHF&MassType=0	https://kronos.stanford.edu/gfy/www/modules/show_out/show_out_wrapper.php?run_id=&search_id=&scans_id=&peptide_id=&scanf=&charge=	https://kronos.stanford.edu/gfy/www/modules/show_out/show_out_wrapper.php?run_id=16837&search_id=21637&scans_id=16835&peptide_id=79751&scanf=7442&charge=3	http://kronos.stanford.edu/gfy/www/modules/sdig/index.php?run_id=16837&search_id=21637&scans_id=16835&peptide_id=79751&scanf=7442	http:/kronos.stanford.edu/gfy/www/modules/ascore/visual/trim-phos.php?run_id=16837&search_id=21637&scans_id=16835&peptide_id=79751&charge=3	1.82201e+06	0.673181	0.0349255	0.328536	0.0596813	0.301741	5.50484
FK506-binding protein-like OS=Mus musculus GN=Fkbpl PE=2 SV=1	sp|O35450|FKBPL_MOUSE	38	S	S|79.97|PGLLPEALK	1	IPFRQRS*PGLLPE	3	1000	2.8703	0.3398	0.3398	96.95	NO OTHERS:3	QRS|79.97|PGLLPEALK, S|79.97|PGLLPEALK	3	0	0	0	SPGLLPEALK	ind_MOUSE.Tryp.TMT.REVUniprot20150423.CONTAM.fasta.hdr	21637	16835	37403	2	16837	21636	16961	16836	19739	3	16838	0.99	21636	33427	16836	30508	2	https://kronos.stanford.edu/cgi-bin/blast_html4?Db=/seq_db/static/ind_MOUSE.Tryp.TMT.REVUniprot20150423.CONTAM.fasta.hdr&Pep=SPGLLPEALK&MassType=0	https://kronos.stanford.edu/gfy/www/modules/show_out/show_out_wrapper.php?run_id=&search_id=&scans_id=&peptide_id=&scanf=&charge=	https://kronos.stanford.edu/gfy/www/modules/show_out/show_out_wrapper.php?run_id=16838&search_id=21636&scans_id=16836&peptide_id=16961&scanf=19739&charge=3	http://kronos.stanford.edu/gfy/www/modules/sdig/index.php?run_id=16838&search_id=21636&scans_id=16836&peptide_id=16961&scanf=19739	http:/kronos.stanford.edu/gfy/www/modules/ascore/visual/trim-phos.php?run_id=16837&search_id=21637&scans_id=16835&peptide_id=37403&charge=2	1.74833e+06	0.978214	0.061761	0.425014	0.0772677	0.104513	5.50054
Filamin, alpha OS=Mus musculus GN=Flna PE=1 SV=1	tr|B7FAU9|B7FAU9_MOUSE	186	T	LPQLPIT|79.97|NFSRDWQSGR	1	LPQLPIT*NFSRDW	1	4.49	2.6042	0.0138	0.3706	19.75	NO OTHERS:1	NONE > ascore = 13	1	0	0	3	LPQLPITNFSRDWQSGR	ind_MOUSE.Tryp.TMT.REVUniprot20150423.CONTAM.fasta.hdr	21634	16839	60234	3	16841	21634	60234	16839	43709	3	16841	0.99	21634	60234	16839	43709	3	https://kronos.stanford.edu/cgi-bin/blast_html4?Db=/seq_db/static/ind_MOUSE.Tryp.TMT.REVUniprot20150423.CONTAM.fasta.hdr&Pep=LPQLPITNFSRDWQSGR&MassType=0	https://kronos.stanford.edu/gfy/www/modules/show_out/show_out_wrapper.php?run_id=&search_id=&scans_id=&peptide_id=&scanf=&charge=	https://kronos.stanford.edu/gfy/www/modules/show_out/show_out_wrapper.php?run_id=16841&search_id=21634&scans_id=16839&peptide_id=60234&scanf=43709&charge=3	http://kronos.stanford.edu/gfy/www/modules/sdig/index.php?run_id=16841&search_id=21634&scans_id=16839&peptide_id=60234&scanf=43709	http:/kronos.stanford.edu/gfy/www/modules/ascore/visual/trim-phos.php?run_id=16841&search_id=21634&scans_id=16839&peptide_id=60234&charge=3	971340	0.927469	0.152987	0.341164	0.0624903	0.0713786	5.45947
Microtubule-associated protein 1A OS=Mus musculus GN=Map1a PE=1 SV=1	tr|A2ARP8|A2ARP8_MOUSE	2021	S	VPS|79.97|APGQES|79.97|PVPDTK	1	TGQRVPS*APGQES	3	64.02	2.4505	0.059	0.1083	48.25	2000, 2006:1; NO OTHERS:1; 2027:1	VPS|79.97|APGQESPVPDTK, VPS|79.97|APGQES|79.97|PVPDTK	1	1	1	2	VPSAPGQESPVPDTK	ind_MOUSE.Tryp.TMT.REVUniprot20150423.CONTAM.fasta.hdr	21639	16833	23714	2	16835	21637	52320	16835	38517	4	16837	0.99	21638	15480	16834	18651	2	https://kronos.stanford.edu/cgi-bin/blast_html4?Db=/seq_db/static/ind_MOUSE.Tryp.TMT.REVUniprot20150423.CONTAM.fasta.hdr&Pep=VPSAPGQESPVPDTK&MassType=0	https://kronos.stanford.edu/gfy/www/modules/show_out/show_out_wrapper.php?run_id=&search_id=&scans_id=&peptide_id=&scanf=&charge=	https://kronos.stanford.edu/gfy/www/modules/show_out/show_out_wrapper.php?run_id=16837&search_id=21637&scans_id=16835&peptide_id=52320&scanf=38517&charge=4	http://kronos.stanford.edu/gfy/www/modules/sdig/index.php?run_id=16837&search_id=21637&scans_id=16835&peptide_id=52320&scanf=38517	http:/kronos.stanford.edu/gfy/www/modules/ascore/visual/trim-phos.php?run_id=16835&search_id=21639&scans_id=16833&peptide_id=23714&charge=2	919832	0.977605	0.067441	0.401432	0.0737232	0.136678	5.44513
mRNA-decapping enzyme 1A OS=Mus musculus GN=Dcp1a PE=1 SV=1	sp|Q91YD3|DCP1A_MOUSE	84	Y	SASPY|79.97|HGFTIVNR	1	RRSASPY*HGFTIV	1	16.18	2.5315	0.0802	0.2761	43.69	NO OTHERS:1	SASPY|79.97|HGFTIVNR	1	0	0	0	SASPYHGFTIVNR	ind_MOUSE.Tryp.TMT.REVUniprot20150423.CONTAM.fasta.hdr	21636	16836	8641	3	16838	21636	8641	16836	14854	3	16838	0.99	21636	8641	16836	14854	3	https://kronos.stanford.edu/cgi-bin/blast_html4?Db=/seq_db/static/ind_MOUSE.Tryp.TMT.REVUniprot20150423.CONTAM.fasta.hdr&Pep=SASPYHGFTIVNR&MassType=0	https://kronos.stanford.edu/gfy/www/modules/show_out/show_out_wrapper.php?run_id=&search_id=&scans_id=&peptide_id=&scanf=&charge=	https://kronos.stanford.edu/gfy/www/modules/show_out/show_out_wrapper.php?run_id=16838&search_id=21636&scans_id=16836&peptide_id=8641&scanf=14854&charge=3	http://kronos.stanford.edu/gfy/www/modules/sdig/index.php?run_id=16838&search_id=21636&scans_id=16836&peptide_id=8641&scanf=14854	http:/kronos.stanford.edu/gfy/www/modules/ascore/visual/trim-phos.php?run_id=16838&search_id=21636&scans_id=16836&peptide_id=8641&charge=3	328212	0.783855	0.0522459	0.340834	0.0628874	0.0719746	5.41975
RNA binding motif protein, X chromosome, isoform CRA_b OS=Mus musculus GN=Rbmx PE=4 SV=1	tr|A2AFI3|A2AFI3_MOUSE	58	S	GFAFVTFES|79.97|PADAK	1	AFVTFES*PADAKD	2	27.03	2.6656	0.1793	0.4441	58.98	NO OTHERS:2	GFAFVTFES|79.97|PADAK, GFAFVTFES|79.97|PADAKDAAR	2	0	0	4	GFAFVTFESPADAKDAAR	ind_MOUSE.Tryp.TMT.REVUniprot20150423.CONTAM.fasta.hdr	21634	16839	46539	2	16841	21634	43646	16839	33888	3	16841	0.99	21634	46539	16839	35590	2	https://kronos.stanford.edu/cgi-bin/blast_html4?Db=/seq_db/static/ind_MOUSE.Tryp.TMT.REVUniprot20150423.CONTAM.fasta.hdr&Pep=GFAFVTFESPADAKDAAR&MassType=0	https://kronos.stanford.edu/gfy/www/modules/show_out/show_out_wrapper.php?run_id=&search_id=&scans_id=&peptide_id=&scanf=&charge=	https://kronos.stanford.edu/gfy/www/modules/show_out/show_out_wrapper.php?run_id=16841&search_id=21634&scans_id=16839&peptide_id=43646&scanf=33888&charge=3	http://kronos.stanford.edu/gfy/www/modules/sdig/index.php?run_id=16841&search_id=21634&scans_id=16839&peptide_id=43646&scanf=33888	http:/kronos.stanford.edu/gfy/www/modules/ascore/visual/trim-phos.php?run_id=16841&search_id=21634&scans_id=16839&peptide_id=46539&charge=2	1.21022e+06	0.916408	0.0665226	0.39458	0.0728083	0.0487874	5.41944
Coiled-coil domain-containing protein 97 OS=Mus musculus GN=Ccdc97 PE=1 SV=1	sp|Q9DBT3|CCD97_MOUSE	221	S	SGSPGTPAYPLS|79.97|DLLFQSYQER	1	TPAYPLS*DLLFQS	1	0	2.7276	0.0789	0.4278	17.09	NO OTHERS:1	NONE > ascore = 13	1	0	0	0	SGSPGTPAYPLSDLLFQSYQER	ind_MOUSE.Tryp.TMT.REVUniprot20150423.CONTAM.fasta.hdr	21636	16836	55860	2	16838	21636	55860	16836	41047	2	16838	0.99	21636	55860	16836	41047	2	https://kronos.stanford.edu/cgi-bin/blast_html4?Db=/seq_db/static/ind_MOUSE.Tryp.TMT.REVUniprot20150423.CONTAM.fasta.hdr&Pep=SGSPGTPAYPLSDLLFQSYQER&MassType=0	https://kronos.stanford.edu/gfy/www/modules/show_out/show_out_wrapper.php?run_id=&search_id=&scans_id=&peptide_id=&scanf=&charge=	https://kronos.stanford.edu/gfy/www/modules/show_out/show_out_wrapper.php?run_id=16838&search_id=21636&scans_id=16836&peptide_id=55860&scanf=41047&charge=2	http://kronos.stanford.edu/gfy/www/modules/sdig/index.php?run_id=16838&search_id=21636&scans_id=16836&peptide_id=55860&scanf=41047	http:/kronos.stanford.edu/gfy/www/modules/ascore/visual/trim-phos.php?run_id=16838&search_id=21636&scans_id=16836&peptide_id=55860&charge=2	143053	0.719531	0.0815454	0.290086	0.0535692	0.247109	5.41516
Drebrin-like protein OS=Mus musculus GN=Dbnl PE=1 SV=2	sp|Q62418|DBNL_MOUSE	277	S	AMS|79.97|TTSVTSSQPGK	1	QKERAMS*TTSVTS	3	16.22	2.2899	0.1009	0.4382	70.82	NO OTHERS:3	AMS|79.97|TTSVTSSQPGK	3	0	0	2	AMSTTSVTSSQPGK	ind_MOUSE.Tryp.TMT.REVUniprot20150423.CONTAM.fasta.hdr	21638	16834	81434	2	16836	21638	81434	16834	7352	2	16836	0.99	21638	81434	16834	7352	2	https://kronos.stanford.edu/cgi-bin/blast_html4?Db=/seq_db/static/ind_MOUSE.Tryp.TMT.REVUniprot20150423.CONTAM.fasta.hdr&Pep=AMSTTSVTSSQPGK&MassType=0	https://kronos.stanford.edu/gfy/www/modules/show_out/show_out_wrapper.php?run_id=&search_id=&scans_id=&peptide_id=&scanf=&charge=	https://kronos.stanford.edu/gfy/www/modules/show_out/show_out_wrapper.php?run_id=16836&search_id=21638&scans_id=16834&peptide_id=81434&scanf=7352&charge=2	http://kronos.stanford.edu/gfy/www/modules/sdig/index.php?run_id=16836&search_id=21638&scans_id=16834&peptide_id=81434&scanf=7352	http:/kronos.stanford.edu/gfy/www/modules/ascore/visual/trim-phos.php?run_id=16836&search_id=21638&scans_id=16834&peptide_id=81434&charge=2	3.10703e+06	0.986185	0.135143	0.422699	0.078091	0.0833734	5.4129
Solute carrier family 12 member 9 OS=Mus musculus GN=Slc12a9 PE=1 SV=2	sp|Q99MR3|S12A9_MOUSE	683	Y	ALSPQDY|79.97|VATVADALK	1	ALSPQDY*VATVAD	1	8.68	1.6579	0.0613	0.3413	32.22	NO OTHERS:1	NONE > ascore = 13	1	0	0	0	ALSPQDYVATVADALK	ind_MOUSE.Tryp.TMT.REVUniprot20150423.CONTAM.fasta.hdr	21636	16836	62592	2	16838	21636	62592	16836	44539	2	16838	0.99	21636	62592	16836	44539	2	https://kronos.stanford.edu/cgi-bin/blast_html4?Db=/seq_db/static/ind_MOUSE.Tryp.TMT.REVUniprot20150423.CONTAM.fasta.hdr&Pep=ALSPQDYVATVADALK&MassType=0	https://kronos.stanford.edu/gfy/www/modules/show_out/show_out_wrapper.php?run_id=&search_id=&scans_id=&peptide_id=&scanf=&charge=	https://kronos.stanford.edu/gfy/www/modules/show_out/show_out_wrapper.php?run_id=16838&search_id=21636&scans_id=16836&peptide_id=62592&scanf=44539&charge=2	http://kronos.stanford.edu/gfy/www/modules/sdig/index.php?run_id=16838&search_id=21636&scans_id=16836&peptide_id=62592&scanf=44539	http:/kronos.stanford.edu/gfy/www/modules/ascore/visual/trim-phos.php?run_id=16838&search_id=21636&scans_id=16836&peptide_id=62592&charge=2	70093.3	0.884648	0.0451529	0.381782	0.0706897	0.0711062	5.40082
Serine/threonine-protein kinase RIO3 OS=Mus musculus GN=Riok3 PE=1 SV=3	sp|Q9DBU3|RIOK3_MOUSE	517	S	AASFLKDDGSPPVLS|79.97|AD	1	GSPPVLS*AD++++	3	17.32	2.6406	0.0168	0.4091	29.31	NO OTHERS:3	AASFLKDDGSPPVLS|79.97|AD	3	0	0	0	AASFLKDDGSPPVLSAD	ind_MOUSE.Tryp.TMT.REVUniprot20150423.CONTAM.fasta.hdr	21638	16834	39696	2	16836	21636	33301	16836	28711	2		0.99	21638	39696	16834	31741	2	https://kronos.stanford.edu/cgi-bin/blast_html4?Db=/seq_db/static/ind_MOUSE.Tryp.TMT.REVUniprot20150423.CONTAM.fasta.hdr&Pep=AASFLKDDGSPPVLSAD&MassType=0	https://kronos.stanford.edu/gfy/www/modules/show_out/show_out_wrapper.php?run_id=&search_id=&scans_id=&peptide_id=&scanf=&charge=	https://kronos.stanford.edu/gfy/www/modules/show_out/show_out_wrapper.php?run_id=&search_id=21636&scans_id=16836&peptide_id=33301&scanf=28711&charge=2	http://kronos.stanford.edu/gfy/www/modules/sdig/index.php?run_id=&search_id=21636&scans_id=16836&peptide_id=33301&scanf=28711	http:/kronos.stanford.edu/gfy/www/modules/ascore/visual/trim-phos.php?run_id=16836&search_id=21638&scans_id=16834&peptide_id=39696&charge=2	7.05324e+06	0.870696	0.0743794	0.344952	0.0644295	0.102302	5.35394
Protein Ahnak2 (Fragment) OS=Mus musculus GN=Ahnak2 PE=1 SV=1	tr|F7DBB3|F7DBB3_MOUSE	1229	T	EVEASITGPMHT|79.97|GSPGLWEASILK	1	ITGPMHT*GSPGLW	1	13.27	4.0634	0.0825	0.5856	81.57	NO OTHERS:1	EVEASITGPMHT|79.97|GSPGLWEASILK	1	0	0	1	EVEASITGPMHTGSPGLWEASILK	ind_MOUSE.Tryp.TMT.REVUniprot20150423.CONTAM.fasta.hdr	21636	16836	44153	2	16838	21636	44153	16836	34750	2	16838	0.99	21636	44153	16836	34750	2	https://kronos.stanford.edu/cgi-bin/blast_html4?Db=/seq_db/static/ind_MOUSE.Tryp.TMT.REVUniprot20150423.CONTAM.fasta.hdr&Pep=EVEASITGPMHTGSPGLWEASILK&MassType=0	https://kronos.stanford.edu/gfy/www/modules/show_out/show_out_wrapper.php?run_id=&search_id=&scans_id=&peptide_id=&scanf=&charge=	https://kronos.stanford.edu/gfy/www/modules/show_out/show_out_wrapper.php?run_id=16838&search_id=21636&scans_id=16836&peptide_id=44153&scanf=34750&charge=2	http://kronos.stanford.edu/gfy/www/modules/sdig/index.php?run_id=16838&search_id=21636&scans_id=16836&peptide_id=44153&scanf=34750	http:/kronos.stanford.edu/gfy/www/modules/ascore/visual/trim-phos.php?run_id=16838&search_id=21636&scans_id=16836&peptide_id=44153&charge=2	163814	0.993168	0.080231	0.41692	0.0790108	0.121698	5.27674
Striatin-3 OS=Mus musculus GN=Strn3 PE=2 SV=1	tr|B2RQS1|B2RQS1_MOUSE	202	S	VRS|79.97|LLGLSNSEPNGSVEAK	1	RSQRVRS*LLGLSN	1	26.27	3.2567	0.0185	0.2751	57.29	NO OTHERS:1	VRS|79.97|LLGLSNSEPNGSVEAK	1	0	0	1	VRSLLGLSNSEPNGSVEAK	ind_MOUSE.Tryp.TMT.REVUniprot20150423.CONTAM.fasta.hdr	21636	16836	26251	3	16838	21636	26251	16836	24824	3	16838	0.99	21636	26251	16836	24824	3	https://kronos.stanford.edu/cgi-bin/blast_html4?Db=/seq_db/static/ind_MOUSE.Tryp.TMT.REVUniprot20150423.CONTAM.fasta.hdr&Pep=VRSLLGLSNSEPNGSVEAK&MassType=0	https://kronos.stanford.edu/gfy/www/modules/show_out/show_out_wrapper.php?run_id=&search_id=&scans_id=&peptide_id=&scanf=&charge=	https://kronos.stanford.edu/gfy/www/modules/show_out/show_out_wrapper.php?run_id=16838&search_id=21636&scans_id=16836&peptide_id=26251&scanf=24824&charge=3	http://kronos.stanford.edu/gfy/www/modules/sdig/index.php?run_id=16838&search_id=21636&scans_id=16836&peptide_id=26251&scanf=24824	http:/kronos.stanford.edu/gfy/www/modules/ascore/visual/trim-phos.php?run_id=16838&search_id=21636&scans_id=16836&peptide_id=26251&charge=3	1.48501e+06	0.9906	0.108034	0.381132	0.0725275	0.101823	5.25501
Protein DDI1 homolog 2 OS=Mus musculus GN=Ddi2 PE=1 SV=1	sp|A2ADY9|DDI2_MOUSE	194	S	LFS|79.97|ADPFDLEAQAK	1	ERIRLFS*ADPFDL	1	1000	2.5767	0.2375	0.2375	51.36	NO OTHERS:1	LFS|79.97|ADPFDLEAQAK	1	0	0	0	LFSADPFDLEAQAK	ind_MOUSE.Tryp.TMT.REVUniprot20150423.CONTAM.fasta.hdr	21636	16836	56074	2	16838	21636	56074	16836	41155	2	16838	0.99	21636	56074	16836	41155	2	https://kronos.stanford.edu/cgi-bin/blast_html4?Db=/seq_db/static/ind_MOUSE.Tryp.TMT.REVUniprot20150423.CONTAM.fasta.hdr&Pep=LFSADPFDLEAQAK&MassType=0	https://kronos.stanford.edu/gfy/www/modules/show_out/show_out_wrapper.php?run_id=&search_id=&scans_id=&peptide_id=&scanf=&charge=	https://kronos.stanford.edu/gfy/www/modules/show_out/show_out_wrapper.php?run_id=16838&search_id=21636&scans_id=16836&peptide_id=56074&scanf=41155&charge=2	http://kronos.stanford.edu/gfy/www/modules/sdig/index.php?run_id=16838&search_id=21636&scans_id=16836&peptide_id=56074&scanf=41155	http:/kronos.stanford.edu/gfy/www/modules/ascore/visual/trim-phos.php?run_id=16838&search_id=21636&scans_id=16836&peptide_id=56074&charge=2	425010	0.989789	0.114919	0.38792	0.0741053	0.0967452	5.23471
Fragile X mental retardation syndrome-related protein 2 OS=Mus musculus GN=Fxr2 PE=1 SV=1	tr|Q6P5B5|Q6P5B5_MOUSE	477	S	AGPGDRDPPS|79.97|RGEESR	1	GDRDPPS*RGEESR	1	13.61	3.4417	0.241	0.241	38.46	NO OTHERS:1	AGPGDRDPPS|79.97|RGEESR	1	0	0	1	AGPGDRDPPSRGEESR	ind_MOUSE.Tryp.TMT.REVUniprot20150423.CONTAM.fasta.hdr	21639	16833	47356	3	16835	21639	47356	16833	3485	3	16835	0.99	21639	47356	16833	3485	3	https://kronos.stanford.edu/cgi-bin/blast_html4?Db=/seq_db/static/ind_MOUSE.Tryp.TMT.REVUniprot20150423.CONTAM.fasta.hdr&Pep=AGPGDRDPPSRGEESR&MassType=0	https://kronos.stanford.edu/gfy/www/modules/show_out/show_out_wrapper.php?run_id=&search_id=&scans_id=&peptide_id=&scanf=&charge=	https://kronos.stanford.edu/gfy/www/modules/show_out/show_out_wrapper.php?run_id=16835&search_id=21639&scans_id=16833&peptide_id=47356&scanf=3485&charge=3	http://kronos.stanford.edu/gfy/www/modules/sdig/index.php?run_id=16835&search_id=21639&scans_id=16833&peptide_id=47356&scanf=3485	http:/kronos.stanford.edu/gfy/www/modules/ascore/visual/trim-phos.php?run_id=16835&search_id=21639&scans_id=16833&peptide_id=47356&charge=3	3.11437e+06	0.916697	0.112294	0.542848	0.104857	0.0756443	5.177
Spastin OS=Mus musculus GN=Spast PE=1 SV=3	sp|Q9QYY8|SPAST_MOUSE	593	S	S|79.97|VSPQTLEAYIR	1	LKKIKRS*VSPQTL	1	10.28	1.7681	0.0034	0.3444	27.25	NO OTHERS:1	NONE > ascore = 13	1	0	0	0	SVSPQTLEAYIR	ind_MOUSE.Tryp.TMT.REVUniprot20150423.CONTAM.fasta.hdr	21637	16835	38931	2	16837	21637	38931	16835	31335	2	16837	0.99	21637	38931	16835	31335	2	https://kronos.stanford.edu/cgi-bin/blast_html4?Db=/seq_db/static/ind_MOUSE.Tryp.TMT.REVUniprot20150423.CONTAM.fasta.hdr&Pep=SVSPQTLEAYIR&MassType=0	https://kronos.stanford.edu/gfy/www/modules/show_out/show_out_wrapper.php?run_id=&search_id=&scans_id=&peptide_id=&scanf=&charge=	https://kronos.stanford.edu/gfy/www/modules/show_out/show_out_wrapper.php?run_id=16837&search_id=21637&scans_id=16835&peptide_id=38931&scanf=31335&charge=2	http://kronos.stanford.edu/gfy/www/modules/sdig/index.php?run_id=16837&search_id=21637&scans_id=16835&peptide_id=38931&scanf=31335	http:/kronos.stanford.edu/gfy/www/modules/ascore/visual/trim-phos.php?run_id=16837&search_id=21637&scans_id=16835&peptide_id=38931&charge=2	400663	0.888706	0.0682207	0.350788	0.0679748	0.104364	5.16056
MKIAA0248 protein (Fragment) OS=Mus musculus GN=Gbf1 PE=1 SV=1	tr|Q6A099|Q6A099_MOUSE	1725	S	APSSSS|79.97|PGSPMASSPSK	1	RAPSSSS*PGSPMA	3	13.24	2.8193	0.056	0.6113	81.76	NO OTHERS:3	APSSSS|79.97|PGSPMASSPSK	3	0	0	1	APSSSSPGSPMASSPSK	ind_MOUSE.Tryp.TMT.REVUniprot20150423.CONTAM.fasta.hdr	21636	16836	79718	2		21636	79718	16836	9367	2		0.99	21636	79718	16836	6085	2	https://kronos.stanford.edu/cgi-bin/blast_html4?Db=/seq_db/static/ind_MOUSE.Tryp.TMT.REVUniprot20150423.CONTAM.fasta.hdr&Pep=APSSSSPGSPMASSPSK&MassType=0	https://kronos.stanford.edu/gfy/www/modules/show_out/show_out_wrapper.php?run_id=&search_id=&scans_id=&peptide_id=&scanf=&charge=	https://kronos.stanford.edu/gfy/www/modules/show_out/show_out_wrapper.php?run_id=&search_id=21636&scans_id=16836&peptide_id=79718&scanf=9367&charge=2	http://kronos.stanford.edu/gfy/www/modules/sdig/index.php?run_id=&search_id=21636&scans_id=16836&peptide_id=79718&scanf=9367	http:/kronos.stanford.edu/gfy/www/modules/ascore/visual/trim-phos.php?run_id=&search_id=21636&scans_id=16836&peptide_id=79718&charge=2	2.5713e+06	0.943532	0.0643199	0.398933	0.0776089	0.080506	5.1403
E3 ubiquitin-protein ligase UBR4 OS=Mus musculus GN=Ubr4 PE=1 SV=1	sp|A2AN08|UBR4_MOUSE	1732	S	RTPS|79.97|SGMSSTMK	1	LVKRTPS*SGMSST	1	0	1.6958	0.0647	0.3211	53.78	NO OTHERS:1	NONE > ascore = 13	1	0	0	3	RTPSSGMSSTMK	ind_MOUSE.Tryp.TMT.REVUniprot20150423.CONTAM.fasta.hdr	21634	16839	71486	2	16841	21634	71486	16839	5865	2	16841	0.99	21634	71486	16839	5865	2	https://kronos.stanford.edu/cgi-bin/blast_html4?Db=/seq_db/static/ind_MOUSE.Tryp.TMT.REVUniprot20150423.CONTAM.fasta.hdr&Pep=RTPSSGMSSTMK&MassType=0	https://kronos.stanford.edu/gfy/www/modules/show_out/show_out_wrapper.php?run_id=&search_id=&scans_id=&peptide_id=&scanf=&charge=	https://kronos.stanford.edu/gfy/www/modules/show_out/show_out_wrapper.php?run_id=16841&search_id=21634&scans_id=16839&peptide_id=71486&scanf=5865&charge=2	http://kronos.stanford.edu/gfy/www/modules/sdig/index.php?run_id=16841&search_id=21634&scans_id=16839&peptide_id=71486&scanf=5865	http:/kronos.stanford.edu/gfy/www/modules/ascore/visual/trim-phos.php?run_id=16841&search_id=21634&scans_id=16839&peptide_id=71486&charge=2	970367	0.894252	0.0810393	0.357281	0.0695133	0.0746127	5.13975
Protein Ahnak OS=Mus musculus GN=Ahnak PE=1 SV=1	tr|E9Q616|E9Q616_MOUSE	893	S	AES|79.97|PEMEVNLPK	1	PGFKAES*PEMEVN	14	1000	2.9336	0.3338	0.3338	80.93	NO OTHERS:14	AES|79.97|PEMEVNLPK, FGMPGFKAES|79.97|PEMEVNLPK	14	0	0	0	AESPEMEVNLPK	ind_MOUSE.Tryp.TMT.REVUniprot20150423.CONTAM.fasta.hdr	21639	16833	23864	2	16835	21639	34845	16833	28379	3		0.99	21634	63800	16839	29495	3	https://kronos.stanford.edu/cgi-bin/blast_html4?Db=/seq_db/static/ind_MOUSE.Tryp.TMT.REVUniprot20150423.CONTAM.fasta.hdr&Pep=AESPEMEVNLPK&MassType=0	https://kronos.stanford.edu/gfy/www/modules/show_out/show_out_wrapper.php?run_id=&search_id=&scans_id=&peptide_id=&scanf=&charge=	https://kronos.stanford.edu/gfy/www/modules/show_out/show_out_wrapper.php?run_id=&search_id=21639&scans_id=16833&peptide_id=34845&scanf=28379&charge=3	http://kronos.stanford.edu/gfy/www/modules/sdig/index.php?run_id=&search_id=21639&scans_id=16833&peptide_id=34845&scanf=28379	http:/kronos.stanford.edu/gfy/www/modules/ascore/visual/trim-phos.php?run_id=16835&search_id=21639&scans_id=16833&peptide_id=23864&charge=2	1.25136e+07	0.997337	0.0656699	0.46823	0.0912093	0.089769	5.13357
Cdc42 effector protein 1 OS=Mus musculus GN=Cdc42ep1 PE=1 SV=1	sp|Q91W92|BORG5_MOUSE	106	S	RMASPAAPS|79.97|PAPPPISPIIK	1	ASPAAPS*PAPPPI	3	9.44	2.4479	0.3575	0.3575	51.74	NO OTHERS:1; 101:2	NONE > ascore = 13	1	2	0	0	RMASPAAPSPAPPPISPIIK	ind_MOUSE.Tryp.TMT.REVUniprot20150423.CONTAM.fasta.hdr	21634	16839	22936	2	16841	21636	38955	16836	31938	3	16838	0.99	21634	22936	16839	22414	2	https://kronos.stanford.edu/cgi-bin/blast_html4?Db=/seq_db/static/ind_MOUSE.Tryp.TMT.REVUniprot20150423.CONTAM.fasta.hdr&Pep=RMASPAAPSPAPPPISPIIK&MassType=0	https://kronos.stanford.edu/gfy/www/modules/show_out/show_out_wrapper.php?run_id=&search_id=&scans_id=&peptide_id=&scanf=&charge=	https://kronos.stanford.edu/gfy/www/modules/show_out/show_out_wrapper.php?run_id=16838&search_id=21636&scans_id=16836&peptide_id=38955&scanf=31938&charge=3	http://kronos.stanford.edu/gfy/www/modules/sdig/index.php?run_id=16838&search_id=21636&scans_id=16836&peptide_id=38955&scanf=31938	http:/kronos.stanford.edu/gfy/www/modules/ascore/visual/trim-phos.php?run_id=16841&search_id=21634&scans_id=16839&peptide_id=22936&charge=2	261679	0.9072	0.0723373	0.376968	0.0746052	0.075072	5.05284
Annexin A1 OS=Mus musculus GN=Anxa1 PE=1 SV=2	sp|P10107|ANXA1_MOUSE	37	S	GGPGSAVS|79.97|PYPSFNVSSDVAALHK	1	GPGSAVS*PYPSFN	5	22.95	4.3774	0.0352	0.4199	73.24	NO OTHERS:5	GGPGSAVS|79.97|PYPSFNVSSDVAALHK	5	0	0	0	GGPGSAVSPYPSFNVSSDVAALHK	ind_MOUSE.Tryp.TMT.REVUniprot20150423.CONTAM.fasta.hdr	21634	16839	31594	3		21636	30244	16836	27002	3	16838	0.99	21636	30244	16836	27002	3	https://kronos.stanford.edu/cgi-bin/blast_html4?Db=/seq_db/static/ind_MOUSE.Tryp.TMT.REVUniprot20150423.CONTAM.fasta.hdr&Pep=GGPGSAVSPYPSFNVSSDVAALHK&MassType=0	https://kronos.stanford.edu/gfy/www/modules/show_out/show_out_wrapper.php?run_id=&search_id=&scans_id=&peptide_id=&scanf=&charge=	https://kronos.stanford.edu/gfy/www/modules/show_out/show_out_wrapper.php?run_id=16838&search_id=21636&scans_id=16836&peptide_id=30244&scanf=27002&charge=3	http://kronos.stanford.edu/gfy/www/modules/sdig/index.php?run_id=16838&search_id=21636&scans_id=16836&peptide_id=30244&scanf=27002	http:/kronos.stanford.edu/gfy/www/modules/ascore/visual/trim-phos.php?run_id=&search_id=21634&scans_id=16839&peptide_id=31594&charge=3	1.93585e+06	0.96143	0.0836331	0.48159	0.095568	0.112273	5.03924
Serine/arginine-rich splicing factor 5 OS=Mus musculus GN=Srsf5 PE=1 SV=2	sp|O35326|SRSF5_MOUSE	117	S	LIVENLSS|79.97|R	1	IVENLSS*RVSWQD	4	20.35	1.8853	0.0545	0.3209	42.63	NO OTHERS:4	LIVENLSS|79.97|R	4	0	0	4	LIVENLSSR	ind_MOUSE.Tryp.TMT.REVUniprot20150423.CONTAM.fasta.hdr	21635	16837	11329	2		21637	24053	16835	23366	2		0.99	21636	20654	16836	24543	2	https://kronos.stanford.edu/cgi-bin/blast_html4?Db=/seq_db/static/ind_MOUSE.Tryp.TMT.REVUniprot20150423.CONTAM.fasta.hdr&Pep=LIVENLSSR&MassType=0	https://kronos.stanford.edu/gfy/www/modules/show_out/show_out_wrapper.php?run_id=&search_id=&scans_id=&peptide_id=&scanf=&charge=	https://kronos.stanford.edu/gfy/www/modules/show_out/show_out_wrapper.php?run_id=&search_id=21637&scans_id=16835&peptide_id=24053&scanf=23366&charge=2	http://kronos.stanford.edu/gfy/www/modules/sdig/index.php?run_id=&search_id=21637&scans_id=16835&peptide_id=24053&scanf=23366	http:/kronos.stanford.edu/gfy/www/modules/ascore/visual/trim-phos.php?run_id=&search_id=21635&scans_id=16837&peptide_id=11329&charge=2	4.28277e+06	0.973736	0.0769107	0.481484	0.0963718	0.0983388	4.9961
Unconventional myosin-Va OS=Mus musculus GN=Myo5a PE=1 SV=1	tr|D3YZ62|D3YZ62_MOUSE	1425	S	KIGELEVGQMENIS|79.97|PGQIIDEPIRPVNIPR	1	GQMENIS*PGQIID	3	1000	4.5052	0.0835	0.5386	47.32	NO OTHERS:3	IGELEVGQMENIS|79.97|PGQIIDEPIRPVNIPR, KIGELEVGQMENIS|79.97|PGQIIDEPIRPVNIPR	3	0	0	3	KIGELEVGQMENISPGQIIDEPIRPVNIPR	ind_MOUSE.Tryp.TMT.REVUniprot20150423.CONTAM.fasta.hdr	21636	16836	43040	5	16838	21636	52006	16836	38978	3		0.99	21636	44181	16836	34764	3	https://kronos.stanford.edu/cgi-bin/blast_html4?Db=/seq_db/static/ind_MOUSE.Tryp.TMT.REVUniprot20150423.CONTAM.fasta.hdr&Pep=KIGELEVGQMENISPGQIIDEPIRPVNIPR&MassType=0	https://kronos.stanford.edu/gfy/www/modules/show_out/show_out_wrapper.php?run_id=&search_id=&scans_id=&peptide_id=&scanf=&charge=	https://kronos.stanford.edu/gfy/www/modules/show_out/show_out_wrapper.php?run_id=&search_id=21636&scans_id=16836&peptide_id=52006&scanf=38978&charge=3	http://kronos.stanford.edu/gfy/www/modules/sdig/index.php?run_id=&search_id=21636&scans_id=16836&peptide_id=52006&scanf=38978	http:/kronos.stanford.edu/gfy/www/modules/ascore/visual/trim-phos.php?run_id=16838&search_id=21636&scans_id=16836&peptide_id=43040&charge=5	34801.4	0.984443	0.0817379	0.397997	0.0799322	0.136625	4.97918
Histone-lysine N-methyltransferase EHMT2 OS=Mus musculus GN=Ehmt2 PE=4 SV=1	tr|A2CG76|A2CG76_MOUSE	1222	S	LDPHPELLPDLS|79.97|SLPPINT	1	ELLPDLS*SLPPIN	4	0	2.6411	0.0007	0.5473	31.74	NO OTHERS:4	NONE > ascore = 13	4	0	0	3	LDPHPELLPDLSSLPPINT	ind_MOUSE.Tryp.TMT.REVUniprot20150423.CONTAM.fasta.hdr	21637	16835	62283	2	16837	21636	57898	16836	42118	2		0.99	21637	62283	16835	43906	2	https://kronos.stanford.edu/cgi-bin/blast_html4?Db=/seq_db/static/ind_MOUSE.Tryp.TMT.REVUniprot20150423.CONTAM.fasta.hdr&Pep=LDPHPELLPDLSSLPPINT&MassType=0	https://kronos.stanford.edu/gfy/www/modules/show_out/show_out_wrapper.php?run_id=&search_id=&scans_id=&peptide_id=&scanf=&charge=	https://kronos.stanford.edu/gfy/www/modules/show_out/show_out_wrapper.php?run_id=&search_id=21636&scans_id=16836&peptide_id=57898&scanf=42118&charge=2	http://kronos.stanford.edu/gfy/www/modules/sdig/index.php?run_id=&search_id=21636&scans_id=16836&peptide_id=57898&scanf=42118	http:/kronos.stanford.edu/gfy/www/modules/ascore/visual/trim-phos.php?run_id=16837&search_id=21637&scans_id=16835&peptide_id=62283&charge=2	273159	0.901422	0.0668239	0.411429	0.0834698	0.193277	4.92907
Vesicle-associated membrane protein-associated protein A OS=Mus musculus GN=Vapa PE=1 SV=2	sp|Q9WV55|VAPA_MOUSE	214	S	VAHSDKPGS|79.97|TSAVSFR	1	HSDKPGS*TSAVSF	1	19.88	1.8753	0.0553	0.472	33.27	NO OTHERS:1	VAHSDKPGS|79.97|TSAVSFR	1	0	0	0	VAHSDKPGSTSAVSFR	ind_MOUSE.Tryp.TMT.REVUniprot20150423.CONTAM.fasta.hdr	21634	16839	73613	2	16841	21634	73613	16839	7015	2	16841	0.99	21634	73613	16839	7015	2	https://kronos.stanford.edu/cgi-bin/blast_html4?Db=/seq_db/static/ind_MOUSE.Tryp.TMT.REVUniprot20150423.CONTAM.fasta.hdr&Pep=VAHSDKPGSTSAVSFR&MassType=0	https://kronos.stanford.edu/gfy/www/modules/show_out/show_out_wrapper.php?run_id=&search_id=&scans_id=&peptide_id=&scanf=&charge=	https://kronos.stanford.edu/gfy/www/modules/show_out/show_out_wrapper.php?run_id=16841&search_id=21634&scans_id=16839&peptide_id=73613&scanf=7015&charge=2	http://kronos.stanford.edu/gfy/www/modules/sdig/index.php?run_id=16841&search_id=21634&scans_id=16839&peptide_id=73613&scanf=7015	http:/kronos.stanford.edu/gfy/www/modules/ascore/visual/trim-phos.php?run_id=16841&search_id=21634&scans_id=16839&peptide_id=73613&charge=2	365464	0.936568	0.0866114	0.525275	0.106883	0.0999483	4.91447
Protein PRRC2A OS=Mus musculus GN=Prrc2a PE=1 SV=1	tr|G3UX48|G3UX48_MOUSE	1148	S	KPPTGPLPPS|79.97|KEPLKEK	1	TGPLPPS*KEPLKE	1	48.55	3.4727	0.3337	0.3888	45.12	NO OTHERS:1	KPPTGPLPPS|79.97|KEPLKEK	1	0	0	1	KPPTGPLPPSKEPLKEK	ind_MOUSE.Tryp.TMT.REVUniprot20150423.CONTAM.fasta.hdr	21634	16839	4401	4	16841	21634	4401	16839	12242	4	16841	0.99	21634	4401	16839	12242	4	https://kronos.stanford.edu/cgi-bin/blast_html4?Db=/seq_db/static/ind_MOUSE.Tryp.TMT.REVUniprot20150423.CONTAM.fasta.hdr&Pep=KPPTGPLPPSKEPLKEK&MassType=0	https://kronos.stanford.edu/gfy/www/modules/show_out/show_out_wrapper.php?run_id=&search_id=&scans_id=&peptide_id=&scanf=&charge=	https://kronos.stanford.edu/gfy/www/modules/show_out/show_out_wrapper.php?run_id=16841&search_id=21634&scans_id=16839&peptide_id=4401&scanf=12242&charge=4	http://kronos.stanford.edu/gfy/www/modules/sdig/index.php?run_id=16841&search_id=21634&scans_id=16839&peptide_id=4401&scanf=12242	http:/kronos.stanford.edu/gfy/www/modules/ascore/visual/trim-phos.php?run_id=16841&search_id=21634&scans_id=16839&peptide_id=4401&charge=4	867317	0.977597	0.0550339	0.503775	0.103048	0.110072	4.88874
Ataxin-3 OS=Mus musculus GN=Atxn3 PE=1 SV=1	tr|E9Q717|E9Q717_MOUSE	260	S	AIQLSMQGS|79.97|SR	1	QLSMQGS*SRSMCE	1	11.51	1.9507	0.0493	0.344	40.76	NO OTHERS:1	NONE > ascore = 13	1	0	0	3	AIQLSMQGSSR	ind_MOUSE.Tryp.TMT.REVUniprot20150423.CONTAM.fasta.hdr	21635	16837	3999	2	16839	21635	3999	16837	12391	2	16839	0.99	21635	3999	16837	12391	2	https://kronos.stanford.edu/cgi-bin/blast_html4?Db=/seq_db/static/ind_MOUSE.Tryp.TMT.REVUniprot20150423.CONTAM.fasta.hdr&Pep=AIQLSMQGSSR&MassType=0	https://kronos.stanford.edu/gfy/www/modules/show_out/show_out_wrapper.php?run_id=&search_id=&scans_id=&peptide_id=&scanf=&charge=	https://kronos.stanford.edu/gfy/www/modules/show_out/show_out_wrapper.php?run_id=16839&search_id=21635&scans_id=16837&peptide_id=3999&scanf=12391&charge=2	http://kronos.stanford.edu/gfy/www/modules/sdig/index.php?run_id=16839&search_id=21635&scans_id=16837&peptide_id=3999&scanf=12391	http:/kronos.stanford.edu/gfy/www/modules/ascore/visual/trim-phos.php?run_id=16839&search_id=21635&scans_id=16837&peptide_id=3999&charge=2	78279.9	0.971294	0.0958971	0.413326	0.0846875	0.0602783	4.88061
Transportin-2 OS=Mus musculus GN=Tnpo2 PE=4 SV=1	tr|E9PV58|E9PV58_MOUSE	772	T	LT|79.97|SPSAIPAITIGR	1	ENTGRLT*SPSAIP	1	22.61	2.1974	0.0599	0.264	37.99	NO OTHERS:1	LT|79.97|SPSAIPAITIGR	1	0	0	0	LTSPSAIPAITIGR	ind_MOUSE.Tryp.TMT.REVUniprot20150423.CONTAM.fasta.hdr	21634	16839	34513	2	16841	21634	34513	16839	28873	2	16841	0.99	21634	34513	16839	28873	2	https://kronos.stanford.edu/cgi-bin/blast_html4?Db=/seq_db/static/ind_MOUSE.Tryp.TMT.REVUniprot20150423.CONTAM.fasta.hdr&Pep=LTSPSAIPAITIGR&MassType=0	https://kronos.stanford.edu/gfy/www/modules/show_out/show_out_wrapper.php?run_id=&search_id=&scans_id=&peptide_id=&scanf=&charge=	https://kronos.stanford.edu/gfy/www/modules/show_out/show_out_wrapper.php?run_id=16841&search_id=21634&scans_id=16839&peptide_id=34513&scanf=28873&charge=2	http://kronos.stanford.edu/gfy/www/modules/sdig/index.php?run_id=16841&search_id=21634&scans_id=16839&peptide_id=34513&scanf=28873	http:/kronos.stanford.edu/gfy/www/modules/ascore/visual/trim-phos.php?run_id=16841&search_id=21634&scans_id=16839&peptide_id=34513&charge=2	459252	0.978891	0.0822715	0.411556	0.084783	0.138195	4.85422
Tyrosine-protein phosphatase non-receptor type 23 OS=Mus musculus GN=Ptpn23 PE=1 SV=2	sp|Q6PB44|PTN23_MOUSE	1179	S	GAAAADLLSSS|79.97|PESQHGGTQPPGGGQPLLQPTK	1	ADLLSSS*PESQHG	1	6.97	3.844	0.0004	0.4439	69.11	NO OTHERS:1	NONE > ascore = 13	1	0	0	1	GAAAADLLSSSPESQHGGTQPPGGGQPLLQPTK	ind_MOUSE.Tryp.TMT.REVUniprot20150423.CONTAM.fasta.hdr	21636	16836	22250	3	16838	21636	22250	16836	22606	3	16838	0.99	21636	22250	16836	22606	3	https://kronos.stanford.edu/cgi-bin/blast_html4?Db=/seq_db/static/ind_MOUSE.Tryp.TMT.REVUniprot20150423.CONTAM.fasta.hdr&Pep=GAAAADLLSSSPESQHGGTQPPGGGQPLLQPTK&MassType=0	https://kronos.stanford.edu/gfy/www/modules/show_out/show_out_wrapper.php?run_id=&search_id=&scans_id=&peptide_id=&scanf=&charge=	https://kronos.stanford.edu/gfy/www/modules/show_out/show_out_wrapper.php?run_id=16838&search_id=21636&scans_id=16836&peptide_id=22250&scanf=22606&charge=3	http://kronos.stanford.edu/gfy/www/modules/sdig/index.php?run_id=16838&search_id=21636&scans_id=16836&peptide_id=22250&scanf=22606	http:/kronos.stanford.edu/gfy/www/modules/ascore/visual/trim-phos.php?run_id=16838&search_id=21636&scans_id=16836&peptide_id=22250&charge=3	985407	0.990268	0.0729424	0.419955	0.0876055	0.105053	4.79371
Transcription intermediary factor 1-beta OS=Mus musculus GN=Trim28 PE=1 SV=3	sp|Q62318|TIF1B_MOUSE	418	S	IVAERPGTNS|79.97|TGPGPMAPPR	1	ERPGTNS*TGPGPM	1	11.01	3.005	0.0594	0.3484	50.9	NO OTHERS:1	NONE > ascore = 13	1	0	0	1	IVAERPGTNSTGPGPMAPPR	ind_MOUSE.Tryp.TMT.REVUniprot20150423.CONTAM.fasta.hdr	21636	16836	5219	3	16838	21636	5219	16836	12839	3	16838	0.99	21636	5219	16836	12839	3	https://kronos.stanford.edu/cgi-bin/blast_html4?Db=/seq_db/static/ind_MOUSE.Tryp.TMT.REVUniprot20150423.CONTAM.fasta.hdr&Pep=IVAERPGTNSTGPGPMAPPR&MassType=0	https://kronos.stanford.edu/gfy/www/modules/show_out/show_out_wrapper.php?run_id=&search_id=&scans_id=&peptide_id=&scanf=&charge=	https://kronos.stanford.edu/gfy/www/modules/show_out/show_out_wrapper.php?run_id=16838&search_id=21636&scans_id=16836&peptide_id=5219&scanf=12839&charge=3	http://kronos.stanford.edu/gfy/www/modules/sdig/index.php?run_id=16838&search_id=21636&scans_id=16836&peptide_id=5219&scanf=12839	http:/kronos.stanford.edu/gfy/www/modules/ascore/visual/trim-phos.php?run_id=16838&search_id=21636&scans_id=16836&peptide_id=5219&charge=3	2.03674e+06	0.956967	0.0837138	0.501871	0.104826	0.108759	4.78765
Rab GTPase-activating protein 1 OS=Mus musculus GN=Rabgap1 PE=1 SV=1	sp|A2AWA9|RBGP1_MOUSE	494	S	LPQS|79.97|GSQSSMIPSPPEDDEEEDNDEPLLSGFGDVSK	1	SVRLPQS*GSQSSM	1	8.98	3.3036	0.0443	0.2892	21.98	NO OTHERS:1	NONE > ascore = 13	1	0	0	1	LPQSGSQSSMIPSPPEDDEEEDNDEPLLSGFGDVSK	ind_MOUSE.Tryp.TMT.REVUniprot20150423.CONTAM.fasta.hdr	21637	16835	54575	4	16837	21637	54575	16835	39721	4	16837	0.99	21637	54575	16835	39721	4	https://kronos.stanford.edu/cgi-bin/blast_html4?Db=/seq_db/static/ind_MOUSE.Tryp.TMT.REVUniprot20150423.CONTAM.fasta.hdr&Pep=LPQSGSQSSMIPSPPEDDEEEDNDEPLLSGFGDVSK&MassType=0	https://kronos.stanford.edu/gfy/www/modules/show_out/show_out_wrapper.php?run_id=&search_id=&scans_id=&peptide_id=&scanf=&charge=	https://kronos.stanford.edu/gfy/www/modules/show_out/show_out_wrapper.php?run_id=16837&search_id=21637&scans_id=16835&peptide_id=54575&scanf=39721&charge=4	http://kronos.stanford.edu/gfy/www/modules/sdig/index.php?run_id=16837&search_id=21637&scans_id=16835&peptide_id=54575&scanf=39721	http:/kronos.stanford.edu/gfy/www/modules/ascore/visual/trim-phos.php?run_id=16837&search_id=21637&scans_id=16835&peptide_id=54575&charge=4	50200.5	0.952888	0.103403	0.353757	0.0739606	0.164761	4.78305
182 kDa tankyrase-1-binding protein OS=Mus musculus GN=Tnks1bp1 PE=1 SV=2	sp|P58871|TB182_MOUSE	1440	S	SPPS|79.97|GSQSLLEGIMTASSSK	1	LTRSPPS*GSQSLL	1	6.96	4.9406	0.01	0.5564	79.45	NO OTHERS:1	NONE > ascore = 13	1	0	0	1	SPPSGSQSLLEGIMTASSSK	ind_MOUSE.Tryp.TMT.REVUniprot20150423.CONTAM.fasta.hdr	21634	16839	47660	3	16841	21634	47660	16839	36220	3	16841	0.99	21634	47660	16839	36220	3	https://kronos.stanford.edu/cgi-bin/blast_html4?Db=/seq_db/static/ind_MOUSE.Tryp.TMT.REVUniprot20150423.CONTAM.fasta.hdr&Pep=SPPSGSQSLLEGIMTASSSK&MassType=0	https://kronos.stanford.edu/gfy/www/modules/show_out/show_out_wrapper.php?run_id=&search_id=&scans_id=&peptide_id=&scanf=&charge=	https://kronos.stanford.edu/gfy/www/modules/show_out/show_out_wrapper.php?run_id=16841&search_id=21634&scans_id=16839&peptide_id=47660&scanf=36220&charge=3	http://kronos.stanford.edu/gfy/www/modules/sdig/index.php?run_id=16841&search_id=21634&scans_id=16839&peptide_id=47660&scanf=36220	http:/kronos.stanford.edu/gfy/www/modules/ascore/visual/trim-phos.php?run_id=16841&search_id=21634&scans_id=16839&peptide_id=47660&charge=3	2.05431e+06	0.985573	0.0655516	0.405873	0.0857954	0.124586	4.7307
Vimentin OS=Mus musculus GN=Vim PE=1 SV=1	tr|A0A0A6YWC8|A0A0A6YWC8_MOUSE	51	S	S|79.97|LYSSSPGGAYVTR	1	RPSTSRS*LYSSSP	3	39.8	2.1386	0.0586	0.178	64.41	NO OTHERS:3	S|79.97|LYSSSPGGAYVTR	3	0	0	2	SLYSSSPGGAYVTR	ind_MOUSE.Tryp.TMT.REVUniprot20150423.CONTAM.fasta.hdr	21637	16835	10371	2	16837	21634	6101	16839	13230	2		0.99	21634	6101	16839	15654	2	https://kronos.stanford.edu/cgi-bin/blast_html4?Db=/seq_db/static/ind_MOUSE.Tryp.TMT.REVUniprot20150423.CONTAM.fasta.hdr&Pep=SLYSSSPGGAYVTR&MassType=0	https://kronos.stanford.edu/gfy/www/modules/show_out/show_out_wrapper.php?run_id=&search_id=&scans_id=&peptide_id=&scanf=&charge=	https://kronos.stanford.edu/gfy/www/modules/show_out/show_out_wrapper.php?run_id=&search_id=21634&scans_id=16839&peptide_id=6101&scanf=13230&charge=2	http://kronos.stanford.edu/gfy/www/modules/sdig/index.php?run_id=&search_id=21634&scans_id=16839&peptide_id=6101&scanf=13230	http:/kronos.stanford.edu/gfy/www/modules/ascore/visual/trim-phos.php?run_id=16837&search_id=21637&scans_id=16835&peptide_id=10371&charge=2	1.88033e+07	0.803618	0.101166	0.311062	0.0658197	0.0698793	4.72596
Vimentin OS=Mus musculus GN=Vim PE=1 SV=3	sp|P20152|VIME_MOUSE	430	S	ETNLES|79.97|LPLVDTHSK	1	RETNLES*LPLVDT	4	34.36	3.8985	0.2088	0.4032	81.08	NO OTHERS:4	ETNLES|79.97|LPLVDTHSK, ETNLES|79.97|LPLVDTHSKR	4	0	0	0	ETNLESLPLVDTHSK	ind_MOUSE.Tryp.TMT.REVUniprot20150423.CONTAM.fasta.hdr	21638	16834	29896	3	16836	21638	29896	16834	26541	3	16836	0.99	21638	29896	16834	26541	3	https://kronos.stanford.edu/cgi-bin/blast_html4?Db=/seq_db/static/ind_MOUSE.Tryp.TMT.REVUniprot20150423.CONTAM.fasta.hdr&Pep=ETNLESLPLVDTHSK&MassType=0	https://kronos.stanford.edu/gfy/www/modules/show_out/show_out_wrapper.php?run_id=&search_id=&scans_id=&peptide_id=&scanf=&charge=	https://kronos.stanford.edu/gfy/www/modules/show_out/show_out_wrapper.php?run_id=16836&search_id=21638&scans_id=16834&peptide_id=29896&scanf=26541&charge=3	http://kronos.stanford.edu/gfy/www/modules/sdig/index.php?run_id=16836&search_id=21638&scans_id=16834&peptide_id=29896&scanf=26541	http:/kronos.stanford.edu/gfy/www/modules/ascore/visual/trim-phos.php?run_id=16836&search_id=21638&scans_id=16834&peptide_id=29896&charge=3	5.54819e+06	0.846863	0.139581	0.29217	0.0620973	0.109945	4.70503
Large proline-rich protein BAG6 OS=Mus musculus GN=Bag6 PE=1 SV=1	tr|Q3UF95|Q3UF95_MOUSE	1084	T	AAGARPLT|79.97|SPESLSR	1	AGARPLT*SPESLS	1	13.24	2.1057	0.0382	0.2806	27.93	NO OTHERS:1	AAGARPLT|79.97|SPESLSR	1	0	0	1	AAGARPLTSPESLSR	ind_MOUSE.Tryp.TMT.REVUniprot20150423.CONTAM.fasta.hdr	21636	16836	79178	2	16838	21636	79178	16836	9056	2	16838	0.99	21636	79178	16836	9056	2	https://kronos.stanford.edu/cgi-bin/blast_html4?Db=/seq_db/static/ind_MOUSE.Tryp.TMT.REVUniprot20150423.CONTAM.fasta.hdr&Pep=AAGARPLTSPESLSR&MassType=0	https://kronos.stanford.edu/gfy/www/modules/show_out/show_out_wrapper.php?run_id=&search_id=&scans_id=&peptide_id=&scanf=&charge=	https://kronos.stanford.edu/gfy/www/modules/show_out/show_out_wrapper.php?run_id=16838&search_id=21636&scans_id=16836&peptide_id=79178&scanf=9056&charge=2	http://kronos.stanford.edu/gfy/www/modules/sdig/index.php?run_id=16838&search_id=21636&scans_id=16836&peptide_id=79178&scanf=9056	http:/kronos.stanford.edu/gfy/www/modules/ascore/visual/trim-phos.php?run_id=16838&search_id=21636&scans_id=16836&peptide_id=79178&charge=2	644831	0.889136	0.0737821	0.344255	0.0732967	0.0998098	4.69673
Band 4.1-like protein 3 OS=Mus musculus GN=Epb41l3 PE=1 SV=1	sp|Q9WV92|E41L3_MOUSE	799	S	VESTS|79.97|VGSISPGGAK	1	VRVESTS*VGSISP	3	13.24	2.7124	0.0399	0.4186	71.5	NO OTHERS:2; 802:1	VESTS|79.97|VGSISPGGAK	2	1	0	7	VESTSVGSISPGGAK	ind_MOUSE.Tryp.TMT.REVUniprot20150423.CONTAM.fasta.hdr	21638	16834	14173	2	16836	21638	14173	16834	17851	2	16836	0.99	21638	14173	16834	17851	2	https://kronos.stanford.edu/cgi-bin/blast_html4?Db=/seq_db/static/ind_MOUSE.Tryp.TMT.REVUniprot20150423.CONTAM.fasta.hdr&Pep=VESTSVGSISPGGAK&MassType=0	https://kronos.stanford.edu/gfy/www/modules/show_out/show_out_wrapper.php?run_id=&search_id=&scans_id=&peptide_id=&scanf=&charge=	https://kronos.stanford.edu/gfy/www/modules/show_out/show_out_wrapper.php?run_id=16836&search_id=21638&scans_id=16834&peptide_id=14173&scanf=17851&charge=2	http://kronos.stanford.edu/gfy/www/modules/sdig/index.php?run_id=16836&search_id=21638&scans_id=16834&peptide_id=14173&scanf=17851	http:/kronos.stanford.edu/gfy/www/modules/ascore/visual/trim-phos.php?run_id=16836&search_id=21638&scans_id=16834&peptide_id=14173&charge=2	2.90709e+06	0.980897	0.103164	0.430427	0.0920012	0.118683	4.6785
Transcription intermediary factor 1-beta OS=Mus musculus GN=Trim28 PE=1 SV=3	sp|Q62318|TIF1B_MOUSE	501	S	LDLDLTSDS|79.97|QPPVFK	1	LDLTSDS*QPPVFK	4	12.74	3.6887	0.1399	0.46	71.63	NO OTHERS:4	NONE > ascore = 13	4	0	0	0	LDLDLTSDSQPPVFK	ind_MOUSE.Tryp.TMT.REVUniprot20150423.CONTAM.fasta.hdr	21637	16835	50870	3		21637	50870	16835	37734	3		0.99	21637	50870	16835	40484	3	https://kronos.stanford.edu/cgi-bin/blast_html4?Db=/seq_db/static/ind_MOUSE.Tryp.TMT.REVUniprot20150423.CONTAM.fasta.hdr&Pep=LDLDLTSDSQPPVFK&MassType=0	https://kronos.stanford.edu/gfy/www/modules/show_out/show_out_wrapper.php?run_id=&search_id=&scans_id=&peptide_id=&scanf=&charge=	https://kronos.stanford.edu/gfy/www/modules/show_out/show_out_wrapper.php?run_id=&search_id=21637&scans_id=16835&peptide_id=50870&scanf=37734&charge=3	http://kronos.stanford.edu/gfy/www/modules/sdig/index.php?run_id=&search_id=21637&scans_id=16835&peptide_id=50870&scanf=37734	http:/kronos.stanford.edu/gfy/www/modules/ascore/visual/trim-phos.php?run_id=&search_id=21637&scans_id=16835&peptide_id=50870&charge=3	3.51724e+06	0.915027	0.167739	0.37775	0.0824301	0.103251	4.58267
Matrix-remodeling-associated protein 8 OS=Mus musculus GN=Mxra8 PE=2 SV=1	sp|Q9DBV4|MXRA8_MOUSE	423	S	AELAHS|79.97|PLPAK	1	RAELAHS*PLPAKD	2	1000	2.5372	0.3013	0.3013	70.62	NO OTHERS:2	AELAHS|79.97|PLPAK	2	0	0	0	AELAHSPLPAK	ind_MOUSE.Tryp.TMT.REVUniprot20150423.CONTAM.fasta.hdr	21637	16835	7122	3	16837	21636	2899	16836	11558	3		0.99	21636	2899	16836	13761	3	https://kronos.stanford.edu/cgi-bin/blast_html4?Db=/seq_db/static/ind_MOUSE.Tryp.TMT.REVUniprot20150423.CONTAM.fasta.hdr&Pep=AELAHSPLPAK&MassType=0	https://kronos.stanford.edu/gfy/www/modules/show_out/show_out_wrapper.php?run_id=&search_id=&scans_id=&peptide_id=&scanf=&charge=	https://kronos.stanford.edu/gfy/www/modules/show_out/show_out_wrapper.php?run_id=&search_id=21636&scans_id=16836&peptide_id=2899&scanf=11558&charge=3	http://kronos.stanford.edu/gfy/www/modules/sdig/index.php?run_id=&search_id=21636&scans_id=16836&peptide_id=2899&scanf=11558	http:/kronos.stanford.edu/gfy/www/modules/ascore/visual/trim-phos.php?run_id=16837&search_id=21637&scans_id=16835&peptide_id=7122&charge=3	1.83897e+06	0.991105	0.0672847	0.43346	0.0951832	0.0878693	4.55396
Far upstream element-binding protein 1 OS=Mus musculus GN=Fubp1 PE=2 SV=1	tr|Q3TUE1|Q3TUE1_MOUSE	410	S	S|79.97|PPPNADPNMK	1	RIELQRS*PPPNAD	4	1000	3.2192	0.0468	0.3937	103.77	NO OTHERS:4	IELQRS|79.97|PPPNADPNMK, S|79.97|PPPNADPNMK	4	0	0	2	SPPPNADPNMK	ind_MOUSE.Tryp.TMT.REVUniprot20150423.CONTAM.fasta.hdr	21638	16834	776	3	16836	21638	13990	16834	17738	3	16836	0.99	21637	10793	16835	17738	3	https://kronos.stanford.edu/cgi-bin/blast_html4?Db=/seq_db/static/ind_MOUSE.Tryp.TMT.REVUniprot20150423.CONTAM.fasta.hdr&Pep=SPPPNADPNMK&MassType=0	https://kronos.stanford.edu/gfy/www/modules/show_out/show_out_wrapper.php?run_id=&search_id=&scans_id=&peptide_id=&scanf=&charge=	https://kronos.stanford.edu/gfy/www/modules/show_out/show_out_wrapper.php?run_id=16836&search_id=21638&scans_id=16834&peptide_id=13990&scanf=17738&charge=3	http://kronos.stanford.edu/gfy/www/modules/sdig/index.php?run_id=16836&search_id=21638&scans_id=16834&peptide_id=13990&scanf=17738	http:/kronos.stanford.edu/gfy/www/modules/ascore/visual/trim-phos.php?run_id=16836&search_id=21638&scans_id=16834&peptide_id=776&charge=3	815220	0.862595	0.0507989	0.367919	0.0808668	0.0765266	4.5497
Serine/threonine-protein kinase Nek9 OS=Mus musculus GN=Nek9 PE=1 SV=2	sp|Q8K1R7|NEK9_MOUSE	834	S	ELENAEFIPMPDS|79.97|PAPLSAAFSQSEK	1	FIPMPDS*PAPLSA	1	14.73	4.2189	0.1254	0.5395	67.77	NO OTHERS:1	ELENAEFIPMPDS|79.97|PAPLSAAFSQSEK	1	0	0	0	ELENAEFIPMPDSPAPLSAAFSQSEK	ind_MOUSE.Tryp.TMT.REVUniprot20150423.CONTAM.fasta.hdr	21637	16835	60055	3	16837	21637	60055	16835	42676	3	16837	0.99	21637	60055	16835	42676	3	https://kronos.stanford.edu/cgi-bin/blast_html4?Db=/seq_db/static/ind_MOUSE.Tryp.TMT.REVUniprot20150423.CONTAM.fasta.hdr&Pep=ELENAEFIPMPDSPAPLSAAFSQSEK&MassType=0	https://kronos.stanford.edu/gfy/www/modules/show_out/show_out_wrapper.php?run_id=&search_id=&scans_id=&peptide_id=&scanf=&charge=	https://kronos.stanford.edu/gfy/www/modules/show_out/show_out_wrapper.php?run_id=16837&search_id=21637&scans_id=16835&peptide_id=60055&scanf=42676&charge=3	http://kronos.stanford.edu/gfy/www/modules/sdig/index.php?run_id=16837&search_id=21637&scans_id=16835&peptide_id=60055&scanf=42676	http:/kronos.stanford.edu/gfy/www/modules/ascore/visual/trim-phos.php?run_id=16837&search_id=21637&scans_id=16835&peptide_id=60055&charge=3	95367.6	0.825039	0.184289	0.285903	0.0628577	0.141159	4.54841
Protein Ahnak2 (Fragment) OS=Mus musculus GN=Ahnak2 PE=1 SV=1	tr|F7DBB3|F7DBB3_MOUSE	1231	S	EVEASITGPMHTGS|79.97|PGLWEASILK	1	GPMHTGS*PGLWEA	2	4.08	4.9891	0.0578	0.52	107.96	NO OTHERS:2	NONE > ascore = 13	2	0	0	1	EVEASITGPMHTGSPGLWEASILK	ind_MOUSE.Tryp.TMT.REVUniprot20150423.CONTAM.fasta.hdr	21634	16839	65001	3		21634	65001	16839	46603	3		0.99	21634	65001	16839	31348	3	https://kronos.stanford.edu/cgi-bin/blast_html4?Db=/seq_db/static/ind_MOUSE.Tryp.TMT.REVUniprot20150423.CONTAM.fasta.hdr&Pep=EVEASITGPMHTGSPGLWEASILK&MassType=0	https://kronos.stanford.edu/gfy/www/modules/show_out/show_out_wrapper.php?run_id=&search_id=&scans_id=&peptide_id=&scanf=&charge=	https://kronos.stanford.edu/gfy/www/modules/show_out/show_out_wrapper.php?run_id=&search_id=21634&scans_id=16839&peptide_id=65001&scanf=46603&charge=3	http://kronos.stanford.edu/gfy/www/modules/sdig/index.php?run_id=&search_id=21634&scans_id=16839&peptide_id=65001&scanf=46603	http:/kronos.stanford.edu/gfy/www/modules/ascore/visual/trim-phos.php?run_id=&search_id=21634&scans_id=16839&peptide_id=65001&charge=3	1.97461e+06	0.997885	0.0801962	0.409005	0.0899901	0.102532	4.545
Transgelin-3 OS=Mus musculus GN=Tagln3 PE=1 SV=1	sp|Q9R1Q8|TAGL3_MOUSE	185	S	GAS|79.97|QAGMTGYGMPR	1	GSNKGAS*QAGMTG	1	60.34	1.6181	0.1054	0.3701	62.47	NO OTHERS:1	GAS|79.97|QAGMTGYGMPR	1	0	0	1	GASQAGMTGYGMPR	ind_MOUSE.Tryp.TMT.REVUniprot20150423.CONTAM.fasta.hdr	21637	16835	8925	2	16837	21637	8925	16835	14811	2	16837	0.99	21637	8925	16835	14811	2	https://kronos.stanford.edu/cgi-bin/blast_html4?Db=/seq_db/static/ind_MOUSE.Tryp.TMT.REVUniprot20150423.CONTAM.fasta.hdr&Pep=GASQAGMTGYGMPR&MassType=0	https://kronos.stanford.edu/gfy/www/modules/show_out/show_out_wrapper.php?run_id=&search_id=&scans_id=&peptide_id=&scanf=&charge=	https://kronos.stanford.edu/gfy/www/modules/show_out/show_out_wrapper.php?run_id=16837&search_id=21637&scans_id=16835&peptide_id=8925&scanf=14811&charge=2	http://kronos.stanford.edu/gfy/www/modules/sdig/index.php?run_id=16837&search_id=21637&scans_id=16835&peptide_id=8925&scanf=14811	http:/kronos.stanford.edu/gfy/www/modules/ascore/visual/trim-phos.php?run_id=16837&search_id=21637&scans_id=16835&peptide_id=8925&charge=2	2.25761e+06	0.972085	0.058052	0.50714	0.111796	0.10124	4.5363
RING finger protein 10 OS=Mus musculus GN=Rnf10 PE=4 SV=1	tr|D3Z1N2|D3Z1N2_MOUSE	39	S	S|79.97|ASAGPAGESKPK	1	GQQPPRS*ASAGPA	1	0	1.8419	0.1819	0.2511	71.56	NO OTHERS:1	NONE > ascore = 13	1	0	0	2	SASAGPAGESKPK	ind_MOUSE.Tryp.TMT.REVUniprot20150423.CONTAM.fasta.hdr	21636	16836	72470	2	16838	21636	72470	16836	5174	2	16838	0.99	21636	72470	16836	5174	2	https://kronos.stanford.edu/cgi-bin/blast_html4?Db=/seq_db/static/ind_MOUSE.Tryp.TMT.REVUniprot20150423.CONTAM.fasta.hdr&Pep=SASAGPAGESKPK&MassType=0	https://kronos.stanford.edu/gfy/www/modules/show_out/show_out_wrapper.php?run_id=&search_id=&scans_id=&peptide_id=&scanf=&charge=	https://kronos.stanford.edu/gfy/www/modules/show_out/show_out_wrapper.php?run_id=16838&search_id=21636&scans_id=16836&peptide_id=72470&scanf=5174&charge=2	http://kronos.stanford.edu/gfy/www/modules/sdig/index.php?run_id=16838&search_id=21636&scans_id=16836&peptide_id=72470&scanf=5174	http:/kronos.stanford.edu/gfy/www/modules/ascore/visual/trim-phos.php?run_id=16838&search_id=21636&scans_id=16836&peptide_id=72470&charge=2	680429	0.85569	0.0876934	0.313995	0.0695157	0.14392	4.51689
Nek1 protein OS=Mus musculus GN=Nek1 PE=1 SV=1	tr|B7ZWK0|B7ZWK0_MOUSE	295	S	RPAS|79.97|GQGVSSFVPAQK	1	PGKRPAS*GQGVSS	1	6.69	2.5857	0.1525	0.1957	40.02	NO OTHERS:1	NONE > ascore = 13	1	0	0	1	RPASGQGVSSFVPAQK	ind_MOUSE.Tryp.TMT.REVUniprot20150423.CONTAM.fasta.hdr	21634	16839	4804	3	16841	21634	4804	16839	12464	3	16841	0.99	21634	4804	16839	12464	3	https://kronos.stanford.edu/cgi-bin/blast_html4?Db=/seq_db/static/ind_MOUSE.Tryp.TMT.REVUniprot20150423.CONTAM.fasta.hdr&Pep=RPASGQGVSSFVPAQK&MassType=0	https://kronos.stanford.edu/gfy/www/modules/show_out/show_out_wrapper.php?run_id=&search_id=&scans_id=&peptide_id=&scanf=&charge=	https://kronos.stanford.edu/gfy/www/modules/show_out/show_out_wrapper.php?run_id=16841&search_id=21634&scans_id=16839&peptide_id=4804&scanf=12464&charge=3	http://kronos.stanford.edu/gfy/www/modules/sdig/index.php?run_id=16841&search_id=21634&scans_id=16839&peptide_id=4804&scanf=12464	http:/kronos.stanford.edu/gfy/www/modules/ascore/visual/trim-phos.php?run_id=16841&search_id=21634&scans_id=16839&peptide_id=4804&charge=3	913596	0.977623	0.118861	0.417638	0.0924987	0.106191	4.51507
Ena/VASP-like protein OS=Mus musculus GN=Evl PE=1 SV=1	tr|E9PVP4|E9PVP4_MOUSE	287	S	AASQTDKPADRKEDESQTEDPS|79.97|TSPSPGTR	1	SQTEDPS*TSPSPG	1	2.24	3.4142	0.0115	0.4197	42.44	NO OTHERS:1	NONE > ascore = 13	1	0	0	3	AASQTDKPADRKEDESQTEDPSTSPSPGTR	ind_MOUSE.Tryp.TMT.REVUniprot20150423.CONTAM.fasta.hdr	21638	16834	43482	4	16836	21638	43482	16834	3382	4	16836	0.99	21638	43482	16834	3382	4	https://kronos.stanford.edu/cgi-bin/blast_html4?Db=/seq_db/static/ind_MOUSE.Tryp.TMT.REVUniprot20150423.CONTAM.fasta.hdr&Pep=AASQTDKPADRKEDESQTEDPSTSPSPGTR&MassType=0	https://kronos.stanford.edu/gfy/www/modules/show_out/show_out_wrapper.php?run_id=&search_id=&scans_id=&peptide_id=&scanf=&charge=	https://kronos.stanford.edu/gfy/www/modules/show_out/show_out_wrapper.php?run_id=16836&search_id=21638&scans_id=16834&peptide_id=43482&scanf=3382&charge=4	http://kronos.stanford.edu/gfy/www/modules/sdig/index.php?run_id=16836&search_id=21638&scans_id=16834&peptide_id=43482&scanf=3382	http:/kronos.stanford.edu/gfy/www/modules/ascore/visual/trim-phos.php?run_id=16836&search_id=21638&scans_id=16834&peptide_id=43482&charge=4	232871	0.936698	0.121466	0.418127	0.0930431	0.133027	4.4939
Centriolin OS=Mus musculus GN=Cntrl PE=2 SV=2	sp|A2AL36|CNTRL_MOUSE	832	S	IHS|79.97|PSDVLGK	1	GEMRIHS*PSDVLG	1	10.36	2.2071	0.1395	0.2538	35.77	NO OTHERS:1	NONE > ascore = 13	1	0	0	5	IHSPSDVLGK	ind_MOUSE.Tryp.TMT.REVUniprot20150423.CONTAM.fasta.hdr	21636	16836	8934	3	16838	21636	8934	16836	15029	3	16838	0.99	21636	8934	16836	15029	3	https://kronos.stanford.edu/cgi-bin/blast_html4?Db=/seq_db/static/ind_MOUSE.Tryp.TMT.REVUniprot20150423.CONTAM.fasta.hdr&Pep=IHSPSDVLGK&MassType=0	https://kronos.stanford.edu/gfy/www/modules/show_out/show_out_wrapper.php?run_id=&search_id=&scans_id=&peptide_id=&scanf=&charge=	https://kronos.stanford.edu/gfy/www/modules/show_out/show_out_wrapper.php?run_id=16838&search_id=21636&scans_id=16836&peptide_id=8934&scanf=15029&charge=3	http://kronos.stanford.edu/gfy/www/modules/sdig/index.php?run_id=16838&search_id=21636&scans_id=16836&peptide_id=8934&scanf=15029	http:/kronos.stanford.edu/gfy/www/modules/ascore/visual/trim-phos.php?run_id=16838&search_id=21636&scans_id=16836&peptide_id=8934&charge=3	264980	0.975671	0.0638526	0.406232	0.0906231	0.0928628	4.48266
Junction-mediating and -regulatory protein OS=Mus musculus GN=Jmy PE=1 SV=1	sp|Q9QXM1|JMY_MOUSE	851	S	SAS|79.97|APAAHLFDSSQLVSAR	1	SIPKSAS*APAAHL	1	0	2.3501	0.1579	0.3463	23.82	NO OTHERS:1	NONE > ascore = 13	1	0	0	1	SASAPAAHLFDSSQLVSAR	ind_MOUSE.Tryp.TMT.REVUniprot20150423.CONTAM.fasta.hdr	21634	16839	19437	2	16841	21634	19437	16839	20607	2	16841	0.99	21634	19437	16839	20607	2	https://kronos.stanford.edu/cgi-bin/blast_html4?Db=/seq_db/static/ind_MOUSE.Tryp.TMT.REVUniprot20150423.CONTAM.fasta.hdr&Pep=SASAPAAHLFDSSQLVSAR&MassType=0	https://kronos.stanford.edu/gfy/www/modules/show_out/show_out_wrapper.php?run_id=&search_id=&scans_id=&peptide_id=&scanf=&charge=	https://kronos.stanford.edu/gfy/www/modules/show_out/show_out_wrapper.php?run_id=16841&search_id=21634&scans_id=16839&peptide_id=19437&scanf=20607&charge=2	http://kronos.stanford.edu/gfy/www/modules/sdig/index.php?run_id=16841&search_id=21634&scans_id=16839&peptide_id=19437&scanf=20607	http:/kronos.stanford.edu/gfy/www/modules/ascore/visual/trim-phos.php?run_id=16841&search_id=21634&scans_id=16839&peptide_id=19437&charge=2	334681	0.93839	0.0742689	0.362955	0.0810158	0.113064	4.48005
26S proteasome non-ATPase regulatory subunit 2 OS=Mus musculus GN=Psmd2 PE=1 SV=1	tr|E9Q2S8|E9Q2S8_MOUSE	20	T	TPVQSQQPSATT|79.97|PSGADEK	1	QQPSATT*PSGADE	4	13.24	4.5506	0.0081	0.4702	93.24	NO OTHERS:4	TPVQSQQPSATT|79.97|PSGADEK	4	0	0	1	DKTPVQSQQPSATTPSGADEK	ind_MOUSE.Tryp.TMT.REVUniprot20150423.CONTAM.fasta.hdr	21638	16834	85114	2	16836	21636	76030	16836	7224	3		0.99	21636	76030	16836	8305	3	https://kronos.stanford.edu/cgi-bin/blast_html4?Db=/seq_db/static/ind_MOUSE.Tryp.TMT.REVUniprot20150423.CONTAM.fasta.hdr&Pep=DKTPVQSQQPSATTPSGADEK&MassType=0	https://kronos.stanford.edu/gfy/www/modules/show_out/show_out_wrapper.php?run_id=&search_id=&scans_id=&peptide_id=&scanf=&charge=	https://kronos.stanford.edu/gfy/www/modules/show_out/show_out_wrapper.php?run_id=&search_id=21636&scans_id=16836&peptide_id=76030&scanf=7224&charge=3	http://kronos.stanford.edu/gfy/www/modules/sdig/index.php?run_id=&search_id=21636&scans_id=16836&peptide_id=76030&scanf=7224	http:/kronos.stanford.edu/gfy/www/modules/ascore/visual/trim-phos.php?run_id=16836&search_id=21638&scans_id=16834&peptide_id=85114&charge=2	424798	0.956181	0.079398	0.37602	0.084145	0.0867625	4.46872
Trinucleotide repeat-containing gene 6B protein OS=Mus musculus GN=Tnrc6b PE=2 SV=2	sp|Q8BKI2|TNR6B_MOUSE	1194	S	GLHTPVQPLSSS|79.97|PGLR	1	VQPLSSS*PGLRAQ	1	0	2.6289	0.0114	0.5219	38.87	NO OTHERS:1	NONE > ascore = 13	1	0	0	0	GLHTPVQPLSSSPGLR	ind_MOUSE.Tryp.TMT.REVUniprot20150423.CONTAM.fasta.hdr	21634	16839	7896	2	16841	21634	7896	16839	14267	2	16841	0.99	21634	7896	16839	14267	2	https://kronos.stanford.edu/cgi-bin/blast_html4?Db=/seq_db/static/ind_MOUSE.Tryp.TMT.REVUniprot20150423.CONTAM.fasta.hdr&Pep=GLHTPVQPLSSSPGLR&MassType=0	https://kronos.stanford.edu/gfy/www/modules/show_out/show_out_wrapper.php?run_id=&search_id=&scans_id=&peptide_id=&scanf=&charge=	https://kronos.stanford.edu/gfy/www/modules/show_out/show_out_wrapper.php?run_id=16841&search_id=21634&scans_id=16839&peptide_id=7896&scanf=14267&charge=2	http://kronos.stanford.edu/gfy/www/modules/sdig/index.php?run_id=16841&search_id=21634&scans_id=16839&peptide_id=7896&scanf=14267	http:/kronos.stanford.edu/gfy/www/modules/ascore/visual/trim-phos.php?run_id=16841&search_id=21634&scans_id=16839&peptide_id=7896&charge=2	824701	0.997295	0.0882838	0.411337	0.0921805	0.086115	4.46229
Myristoylated alanine-rich C-kinase substrate OS=Mus musculus GN=Marcks PE=1 SV=2	sp|P26645|MARCS_MOUSE	46	S	VNGDAS|79.97|PAAAEPGAK	1	KVNGDAS*PAAAEP	1	1000	2.3706	0.3339	0.3339	61.81	NO OTHERS:1	VNGDAS|79.97|PAAAEPGAK	1	0	0	0	VNGDASPAAAEPGAK	ind_MOUSE.Tryp.TMT.REVUniprot20150423.CONTAM.fasta.hdr	21639	16833	5447	2	16835	21639	5447	16833	12617	2	16835	0.99	21639	5447	16833	12617	2	https://kronos.stanford.edu/cgi-bin/blast_html4?Db=/seq_db/static/ind_MOUSE.Tryp.TMT.REVUniprot20150423.CONTAM.fasta.hdr&Pep=VNGDASPAAAEPGAK&MassType=0	https://kronos.stanford.edu/gfy/www/modules/show_out/show_out_wrapper.php?run_id=&search_id=&scans_id=&peptide_id=&scanf=&charge=	https://kronos.stanford.edu/gfy/www/modules/show_out/show_out_wrapper.php?run_id=16835&search_id=21639&scans_id=16833&peptide_id=5447&scanf=12617&charge=2	http://kronos.stanford.edu/gfy/www/modules/sdig/index.php?run_id=16835&search_id=21639&scans_id=16833&peptide_id=5447&scanf=12617	http:/kronos.stanford.edu/gfy/www/modules/ascore/visual/trim-phos.php?run_id=16835&search_id=21639&scans_id=16833&peptide_id=5447&charge=2	4.23782e+06	0.946131	0.157909	0.355116	0.0796462	0.0768728	4.45867
Protein Ahnak OS=Mus musculus GN=Ahnak PE=1 SV=1	tr|E9Q616|E9Q616_MOUSE	110	S	S|79.97|SEVVLSGDDEDYQR	1	EVFSSRS*SEVVLS	1	0	2.8001	0.0002	0.5984	89.08	NO OTHERS:1	NONE > ascore = 13	1	0	0	0	SSEVVLSGDDEDYQR	ind_MOUSE.Tryp.TMT.REVUniprot20150423.CONTAM.fasta.hdr	21639	16833	16130	2	16835	21639	16130	16833	18086	2	16835	0.99	21639	16130	16833	18086	2	https://kronos.stanford.edu/cgi-bin/blast_html4?Db=/seq_db/static/ind_MOUSE.Tryp.TMT.REVUniprot20150423.CONTAM.fasta.hdr&Pep=SSEVVLSGDDEDYQR&MassType=0	https://kronos.stanford.edu/gfy/www/modules/show_out/show_out_wrapper.php?run_id=&search_id=&scans_id=&peptide_id=&scanf=&charge=	https://kronos.stanford.edu/gfy/www/modules/show_out/show_out_wrapper.php?run_id=16835&search_id=21639&scans_id=16833&peptide_id=16130&scanf=18086&charge=2	http://kronos.stanford.edu/gfy/www/modules/sdig/index.php?run_id=16835&search_id=21639&scans_id=16833&peptide_id=16130&scanf=18086	http:/kronos.stanford.edu/gfy/www/modules/ascore/visual/trim-phos.php?run_id=16835&search_id=21639&scans_id=16833&peptide_id=16130&charge=2	1.36661e+06	0.980362	0.0695517	0.454246	0.1026	0.124177	4.42736
Small glutamine-rich tetratricopeptide repeat-containing protein alpha OS=Mus musculus GN=Sgta PE=1 SV=2	sp|Q8BJU0|SGTA_MOUSE	82	T	APDRT|79.97|PPSEEDSAEAER	1	PRAPDRT*PPSEED	3	57.78	3.3591	0.2503	0.3803	58.32	NO OTHERS:3	APDRT|79.97|PPSEEDSAEAER	3	0	0	1	APDRTPPSEEDSAEAER	ind_MOUSE.Tryp.TMT.REVUniprot20150423.CONTAM.fasta.hdr	21636	16836	33912	3		21639	67679	16833	4510	3	16835	0.99	21638	38774	16834	4510	3	https://kronos.stanford.edu/cgi-bin/blast_html4?Db=/seq_db/static/ind_MOUSE.Tryp.TMT.REVUniprot20150423.CONTAM.fasta.hdr&Pep=APDRTPPSEEDSAEAER&MassType=0	https://kronos.stanford.edu/gfy/www/modules/show_out/show_out_wrapper.php?run_id=&search_id=&scans_id=&peptide_id=&scanf=&charge=	https://kronos.stanford.edu/gfy/www/modules/show_out/show_out_wrapper.php?run_id=16835&search_id=21639&scans_id=16833&peptide_id=67679&scanf=4510&charge=3	http://kronos.stanford.edu/gfy/www/modules/sdig/index.php?run_id=16835&search_id=21639&scans_id=16833&peptide_id=67679&scanf=4510	http:/kronos.stanford.edu/gfy/www/modules/ascore/visual/trim-phos.php?run_id=&search_id=21636&scans_id=16836&peptide_id=33912&charge=3	6.77684e+06	0.890807	0.0614449	0.362181	0.0818595	0.0924881	4.42443
Death-inducer obliterator 1 OS=Mus musculus GN=Dido1 PE=1 SV=4	sp|Q8C9B9|DIDO1_MOUSE	1842	S	GLSPS|79.97|YLGGPR	1	NRGLSPS*YLGGPR	1	8.58	1.9335	0.0045	0.4736	27.18	NO OTHERS:1	NONE > ascore = 13	1	0	0	0	GLSPSYLGGPR	ind_MOUSE.Tryp.TMT.REVUniprot20150423.CONTAM.fasta.hdr	21636	16836	15402	2	16838	21636	15402	16836	18821	2	16838	0.99	21636	15402	16836	18821	2	https://kronos.stanford.edu/cgi-bin/blast_html4?Db=/seq_db/static/ind_MOUSE.Tryp.TMT.REVUniprot20150423.CONTAM.fasta.hdr&Pep=GLSPSYLGGPR&MassType=0	https://kronos.stanford.edu/gfy/www/modules/show_out/show_out_wrapper.php?run_id=&search_id=&scans_id=&peptide_id=&scanf=&charge=	https://kronos.stanford.edu/gfy/www/modules/show_out/show_out_wrapper.php?run_id=16838&search_id=21636&scans_id=16836&peptide_id=15402&scanf=18821&charge=2	http://kronos.stanford.edu/gfy/www/modules/sdig/index.php?run_id=16838&search_id=21636&scans_id=16836&peptide_id=15402&scanf=18821	http:/kronos.stanford.edu/gfy/www/modules/ascore/visual/trim-phos.php?run_id=16838&search_id=21636&scans_id=16836&peptide_id=15402&charge=2	2.12202e+06	0.942707	0.0857802	0.367903	0.0834515	0.0916955	4.40859
Unconventional myosin-Va OS=Mus musculus GN=Myo5a PE=1 SV=1	tr|D3YZ62|D3YZ62_MOUSE	600	S	MLPELFQDDEKAIS|79.97|PTSATSSGR	1	DDEKAIS*PTSATS	1	10.36	3.4139	0.0552	0.5507	65.37	NO OTHERS:1	NONE > ascore = 13	1	0	0	2	MLPELFQDDEKAISPTSATSSGR	ind_MOUSE.Tryp.TMT.REVUniprot20150423.CONTAM.fasta.hdr	21636	16836	36579	3	16838	21636	36579	16836	30585	3	16838	0.99	21636	36579	16836	30585	3	https://kronos.stanford.edu/cgi-bin/blast_html4?Db=/seq_db/static/ind_MOUSE.Tryp.TMT.REVUniprot20150423.CONTAM.fasta.hdr&Pep=MLPELFQDDEKAISPTSATSSGR&MassType=0	https://kronos.stanford.edu/gfy/www/modules/show_out/show_out_wrapper.php?run_id=&search_id=&scans_id=&peptide_id=&scanf=&charge=	https://kronos.stanford.edu/gfy/www/modules/show_out/show_out_wrapper.php?run_id=16838&search_id=21636&scans_id=16836&peptide_id=36579&scanf=30585&charge=3	http://kronos.stanford.edu/gfy/www/modules/sdig/index.php?run_id=16838&search_id=21636&scans_id=16836&peptide_id=36579&scanf=30585	http:/kronos.stanford.edu/gfy/www/modules/ascore/visual/trim-phos.php?run_id=16838&search_id=21636&scans_id=16836&peptide_id=36579&charge=3	3.21863e+06	0.872685	0.0800891	0.332755	0.0756381	0.0886935	4.3993
Protein NEDD1 OS=Mus musculus GN=Nedd1 PE=1 SV=2	sp|P33215|NEDD1_MOUSE	351	T	EAPSPSIAT|79.97|VLPQPVTTALGK	1	PSPSIAT*VLPQPV	1	13.38	2.3198	0.1251	0.587	56.98	NO OTHERS:1	EAPSPSIAT|79.97|VLPQPVTTALGK	1	0	0	1	EAPSPSIATVLPQPVTTALGK	ind_MOUSE.Tryp.TMT.REVUniprot20150423.CONTAM.fasta.hdr	21634	16839	52150	2	16841	21634	52150	16839	38852	2	16841	0.99	21634	52150	16839	38852	2	https://kronos.stanford.edu/cgi-bin/blast_html4?Db=/seq_db/static/ind_MOUSE.Tryp.TMT.REVUniprot20150423.CONTAM.fasta.hdr&Pep=EAPSPSIATVLPQPVTTALGK&MassType=0	https://kronos.stanford.edu/gfy/www/modules/show_out/show_out_wrapper.php?run_id=&search_id=&scans_id=&peptide_id=&scanf=&charge=	https://kronos.stanford.edu/gfy/www/modules/show_out/show_out_wrapper.php?run_id=16841&search_id=21634&scans_id=16839&peptide_id=52150&scanf=38852&charge=2	http://kronos.stanford.edu/gfy/www/modules/sdig/index.php?run_id=16841&search_id=21634&scans_id=16839&peptide_id=52150&scanf=38852	http:/kronos.stanford.edu/gfy/www/modules/ascore/visual/trim-phos.php?run_id=16841&search_id=21634&scans_id=16839&peptide_id=52150&charge=2	308454	0.996126	0.101457	0.421541	0.09605	0.08894	4.38877
Uncharacterized protein OS=Mus musculus GN=Gm6576 PE=3 SV=2	tr|F6YTZ4|F6YTZ4_MOUSE	246	S	ETVFTKS|79.97|PYQEFTDHLVK	1	ETVFTKS*PYQEFT	3	17.56	4.4954	0.0535	0.3397	108.32	NO OTHERS:3	ETVFTKS|79.97|PYQEFTDHLVK	3	0	0	2	SPYQEFTDHLVK	ind_MOUSE.Tryp.TMT.REVUniprot20150423.CONTAM.fasta.hdr	21634	16839	64425	4	16841	21634	64425	16839	46263	4	16841	0.99	21637	27661	16835	25284	3	https://kronos.stanford.edu/cgi-bin/blast_html4?Db=/seq_db/static/ind_MOUSE.Tryp.TMT.REVUniprot20150423.CONTAM.fasta.hdr&Pep=SPYQEFTDHLVK&MassType=0	https://kronos.stanford.edu/gfy/www/modules/show_out/show_out_wrapper.php?run_id=&search_id=&scans_id=&peptide_id=&scanf=&charge=	https://kronos.stanford.edu/gfy/www/modules/show_out/show_out_wrapper.php?run_id=16841&search_id=21634&scans_id=16839&peptide_id=64425&scanf=46263&charge=4	http://kronos.stanford.edu/gfy/www/modules/sdig/index.php?run_id=16841&search_id=21634&scans_id=16839&peptide_id=64425&scanf=46263	http:/kronos.stanford.edu/gfy/www/modules/ascore/visual/trim-phos.php?run_id=16841&search_id=21634&scans_id=16839&peptide_id=64425&charge=4	1.7233e+06	0.888449	0.0889939	0.324124	0.0744748	0.0971135	4.35213
Transcription factor RelB OS=Mus musculus GN=Relb PE=1 SV=2	sp|Q04863|RELB_MOUSE	552	S	EAAFGGGLLS|79.97|PGPEAT	1	FGGGLLS*PGPEAT	2	20.62	3.1371	0.0754	0.6382	65.08	NO OTHERS:2	EAAFGGGLLS|79.97|PGPEAT	2	0	0	1	EAAFGGGLLSPGPEAT	ind_MOUSE.Tryp.TMT.REVUniprot20150423.CONTAM.fasta.hdr	21638	16834	45770	3		21638	45770	16834	35070	3		0.99	21638	45770	16834	35607	3	https://kronos.stanford.edu/cgi-bin/blast_html4?Db=/seq_db/static/ind_MOUSE.Tryp.TMT.REVUniprot20150423.CONTAM.fasta.hdr&Pep=EAAFGGGLLSPGPEAT&MassType=0	https://kronos.stanford.edu/gfy/www/modules/show_out/show_out_wrapper.php?run_id=&search_id=&scans_id=&peptide_id=&scanf=&charge=	https://kronos.stanford.edu/gfy/www/modules/show_out/show_out_wrapper.php?run_id=&search_id=21638&scans_id=16834&peptide_id=45770&scanf=35070&charge=3	http://kronos.stanford.edu/gfy/www/modules/sdig/index.php?run_id=&search_id=21638&scans_id=16834&peptide_id=45770&scanf=35070	http:/kronos.stanford.edu/gfy/www/modules/ascore/visual/trim-phos.php?run_id=&search_id=21638&scans_id=16834&peptide_id=45770&charge=3	172133	0.873294	0.159803	0.309918	0.0712135	0.064605	4.35196
Nucleosome assembly protein 1-like 1 OS=Mus musculus GN=Nap1l1 PE=1 SV=1	tr|E9PW66|E9PW66_MOUSE	93	Y	LDGLVDTPTGY|79.97|IESLPK	1	VDTPTGY*IESLPK	3	5.95	2.9266	0.0143	0.4261	52.49	NO OTHERS:3	NONE > ascore = 13	3	0	0	1	LDGLVDTPTGYIESLPK	ind_MOUSE.Tryp.TMT.REVUniprot20150423.CONTAM.fasta.hdr	21637	16835	56656	3		21634	59806	16839	43460	3		0.99	21637	56656	16835	40065	3	https://kronos.stanford.edu/cgi-bin/blast_html4?Db=/seq_db/static/ind_MOUSE.Tryp.TMT.REVUniprot20150423.CONTAM.fasta.hdr&Pep=LDGLVDTPTGYIESLPK&MassType=0	https://kronos.stanford.edu/gfy/www/modules/show_out/show_out_wrapper.php?run_id=&search_id=&scans_id=&peptide_id=&scanf=&charge=	https://kronos.stanford.edu/gfy/www/modules/show_out/show_out_wrapper.php?run_id=&search_id=21634&scans_id=16839&peptide_id=59806&scanf=43460&charge=3	http://kronos.stanford.edu/gfy/www/modules/sdig/index.php?run_id=&search_id=21634&scans_id=16839&peptide_id=59806&scanf=43460	http:/kronos.stanford.edu/gfy/www/modules/ascore/visual/trim-phos.php?run_id=&search_id=21637&scans_id=16835&peptide_id=56656&charge=3	858096	0.981492	0.106455	0.393613	0.0905199	0.127722	4.34836
Protein Ahnak OS=Mus musculus GN=Ahnak PE=1 SV=1	tr|E9Q616|E9Q616_MOUSE	5022	S	IS|79.97|APGVK	1	FSLPKIS*APGVKM	1	1000	1.2028	0.023	0.023	43.34	NO OTHERS:1	IS|79.97|APGVK	1	0	0	0	ISAPGVK	ind_MOUSE.Tryp.TMT.REVUniprot20150423.CONTAM.fasta.hdr	21636	16836	8745	2	16838	21636	8745	16836	14913	2	16838	0.99	21636	8745	16836	14913	2	https://kronos.stanford.edu/cgi-bin/blast_html4?Db=/seq_db/static/ind_MOUSE.Tryp.TMT.REVUniprot20150423.CONTAM.fasta.hdr&Pep=ISAPGVK&MassType=0	https://kronos.stanford.edu/gfy/www/modules/show_out/show_out_wrapper.php?run_id=&search_id=&scans_id=&peptide_id=&scanf=&charge=	https://kronos.stanford.edu/gfy/www/modules/show_out/show_out_wrapper.php?run_id=16838&search_id=21636&scans_id=16836&peptide_id=8745&scanf=14913&charge=2	http://kronos.stanford.edu/gfy/www/modules/sdig/index.php?run_id=16838&search_id=21636&scans_id=16836&peptide_id=8745&scanf=14913	http:/kronos.stanford.edu/gfy/www/modules/ascore/visual/trim-phos.php?run_id=16838&search_id=21636&scans_id=16836&peptide_id=8745&charge=2	1.61513e+06	0.821957	0.222984	0.326216	0.0755533	0.0710655	4.3177
182 kDa tankyrase-1-binding protein OS=Mus musculus GN=Tnks1bp1 PE=1 SV=2	sp|P58871|TB182_MOUSE	1444	S	SPPSGSQS|79.97|LLEGIMTASSSK	1	PPSGSQS*LLEGIM	1	4.08	1.8063	0.0507	0.2163	27.53	NO OTHERS:1	NONE > ascore = 13	1	0	0	1	SPPSGSQSLLEGIMTASSSK	ind_MOUSE.Tryp.TMT.REVUniprot20150423.CONTAM.fasta.hdr	21634	16839	27619	2	16841	21634	27619	16839	24966	2	16841	0.99	21634	27619	16839	24966	2	https://kronos.stanford.edu/cgi-bin/blast_html4?Db=/seq_db/static/ind_MOUSE.Tryp.TMT.REVUniprot20150423.CONTAM.fasta.hdr&Pep=SPPSGSQSLLEGIMTASSSK&MassType=0	https://kronos.stanford.edu/gfy/www/modules/show_out/show_out_wrapper.php?run_id=&search_id=&scans_id=&peptide_id=&scanf=&charge=	https://kronos.stanford.edu/gfy/www/modules/show_out/show_out_wrapper.php?run_id=16841&search_id=21634&scans_id=16839&peptide_id=27619&scanf=24966&charge=2	http://kronos.stanford.edu/gfy/www/modules/sdig/index.php?run_id=16841&search_id=21634&scans_id=16839&peptide_id=27619&scanf=24966	http:/kronos.stanford.edu/gfy/www/modules/ascore/visual/trim-phos.php?run_id=16841&search_id=21634&scans_id=16839&peptide_id=27619&charge=2	495898	0.993816	0.0797615	0.413527	0.0966802	0.0912045	4.27726
Microtubule-associated protein 6 OS=Mus musculus GN=Map6 PE=1 SV=2	sp|Q7TSJ2|MAP6_MOUSE	634	T	GQSPT|79.97|APGPTKDQGAVLLGPVK	1	LKGQSPT*APGPTK	1	18.87	3.4649	0.0677	0.4551	52.24	NO OTHERS:1	GQSPT|79.97|APGPTKDQGAVLLGPVK	1	0	0	0	GQSPTAPGPTKDQGAVLLGPVK	ind_MOUSE.Tryp.TMT.REVUniprot20150423.CONTAM.fasta.hdr	21634	16839	17308	3	16841	21634	17308	16839	19548	3	16841	0.99	21634	17308	16839	19548	3	https://kronos.stanford.edu/cgi-bin/blast_html4?Db=/seq_db/static/ind_MOUSE.Tryp.TMT.REVUniprot20150423.CONTAM.fasta.hdr&Pep=GQSPTAPGPTKDQGAVLLGPVK&MassType=0	https://kronos.stanford.edu/gfy/www/modules/show_out/show_out_wrapper.php?run_id=&search_id=&scans_id=&peptide_id=&scanf=&charge=	https://kronos.stanford.edu/gfy/www/modules/show_out/show_out_wrapper.php?run_id=16841&search_id=21634&scans_id=16839&peptide_id=17308&scanf=19548&charge=3	http://kronos.stanford.edu/gfy/www/modules/sdig/index.php?run_id=16841&search_id=21634&scans_id=16839&peptide_id=17308&scanf=19548	http:/kronos.stanford.edu/gfy/www/modules/ascore/visual/trim-phos.php?run_id=16841&search_id=21634&scans_id=16839&peptide_id=17308&charge=3	1.25604e+06	0.912977	0.0639117	0.366227	0.0858357	0.070165	4.26661
Vinculin OS=Mus musculus GN=Vcl PE=1 SV=4	sp|Q64727|VINC_MOUSE	793	T	T|79.97|ISPMVMDAK	1	SDELSKT*ISPMVM	1	10.28	1.5565	0.2113	0.3531	52.3	NO OTHERS:1	NONE > ascore = 13	1	0	0	0	TISPMVMDAK	ind_MOUSE.Tryp.TMT.REVUniprot20150423.CONTAM.fasta.hdr	21637	16835	28209	2	16837	21637	28209	16835	25574	2	16837	0.99	21637	28209	16835	25574	2	https://kronos.stanford.edu/cgi-bin/blast_html4?Db=/seq_db/static/ind_MOUSE.Tryp.TMT.REVUniprot20150423.CONTAM.fasta.hdr&Pep=TISPMVMDAK&MassType=0	https://kronos.stanford.edu/gfy/www/modules/show_out/show_out_wrapper.php?run_id=&search_id=&scans_id=&peptide_id=&scanf=&charge=	https://kronos.stanford.edu/gfy/www/modules/show_out/show_out_wrapper.php?run_id=16837&search_id=21637&scans_id=16835&peptide_id=28209&scanf=25574&charge=2	http://kronos.stanford.edu/gfy/www/modules/sdig/index.php?run_id=16837&search_id=21637&scans_id=16835&peptide_id=28209&scanf=25574	http:/kronos.stanford.edu/gfy/www/modules/ascore/visual/trim-phos.php?run_id=16837&search_id=21637&scans_id=16835&peptide_id=28209&charge=2	1.3724e+06	0.788892	0.0632632	0.323261	0.0758727	0.0786831	4.26057
RUN and FYVE domain-containing protein 1 OS=Mus musculus GN=Rufy1 PE=1 SV=1	sp|Q8BIJ7|RUFY1_MOUSE	52	S	SQLPS|79.97|PGELR	1	DRSQLPS*PGELRS	1	25.37	1.6808	0.2189	0.287	35.07	NO OTHERS:1	SQLPS|79.97|PGELR	1	0	0	0	SQLPSPGELR	ind_MOUSE.Tryp.TMT.REVUniprot20150423.CONTAM.fasta.hdr	21638	16834	16583	2	16836	21638	16583	16834	19311	2	16836	0.99	21638	16583	16834	19311	2	https://kronos.stanford.edu/cgi-bin/blast_html4?Db=/seq_db/static/ind_MOUSE.Tryp.TMT.REVUniprot20150423.CONTAM.fasta.hdr&Pep=SQLPSPGELR&MassType=0	https://kronos.stanford.edu/gfy/www/modules/show_out/show_out_wrapper.php?run_id=&search_id=&scans_id=&peptide_id=&scanf=&charge=	https://kronos.stanford.edu/gfy/www/modules/show_out/show_out_wrapper.php?run_id=16836&search_id=21638&scans_id=16834&peptide_id=16583&scanf=19311&charge=2	http://kronos.stanford.edu/gfy/www/modules/sdig/index.php?run_id=16836&search_id=21638&scans_id=16834&peptide_id=16583&scanf=19311	http:/kronos.stanford.edu/gfy/www/modules/ascore/visual/trim-phos.php?run_id=16836&search_id=21638&scans_id=16834&peptide_id=16583&charge=2	910524	0.993008	0.119702	0.387865	0.0913198	0.113651	4.24733
Dynamin-1 (Fragment) OS=Mus musculus GN=Dnm1 PE=4 SV=1	tr|F6TH70|F6TH70_MOUSE	92	S	APAVPPARPGS|79.97|R	1	PPARPGS*RGPAPG	4	1000	2.2702	0.3927	0.3927	42.91	NO OTHERS:4	APAVPPARPGS|79.97|R, RAPAVPPARPGS|79.97|R	4	0	0	5	APAVPPARPGSR	ind_MOUSE.Tryp.TMT.REVUniprot20150423.CONTAM.fasta.hdr	21636	16836	71901	3	16838	21634	30971	16839	2687	3	16841	0.99	21634	30971	16839	2687	3	https://kronos.stanford.edu/cgi-bin/blast_html4?Db=/seq_db/static/ind_MOUSE.Tryp.TMT.REVUniprot20150423.CONTAM.fasta.hdr&Pep=APAVPPARPGSR&MassType=0	https://kronos.stanford.edu/gfy/www/modules/show_out/show_out_wrapper.php?run_id=&search_id=&scans_id=&peptide_id=&scanf=&charge=	https://kronos.stanford.edu/gfy/www/modules/show_out/show_out_wrapper.php?run_id=16841&search_id=21634&scans_id=16839&peptide_id=30971&scanf=2687&charge=3	http://kronos.stanford.edu/gfy/www/modules/sdig/index.php?run_id=16841&search_id=21634&scans_id=16839&peptide_id=30971&scanf=2687	http:/kronos.stanford.edu/gfy/www/modules/ascore/visual/trim-phos.php?run_id=16838&search_id=21636&scans_id=16836&peptide_id=71901&charge=3	2.98736e+06	0.812983	0.0570394	0.318794	0.0758116	0.186612	4.20508
Calpastatin OS=Mus musculus GN=Cast PE=1 SV=2	sp|P51125|ICAL_MOUSE	81	S	VTASSAATSKS|79.97|PSMSTTETK	1	SAATSKS*PSMSTT	2	18.87	3.4204	0.0194	0.435	73.92	NO OTHERS:2	S|79.97|PSMSTTETK, VTASSAATSKS|79.97|PSMSTTETK	2	0	0	4	SPSMSTTETK	ind_MOUSE.Tryp.TMT.REVUniprot20150423.CONTAM.fasta.hdr	21634	16839	72688	2	16841	21634	72688	16839	6511	2	16841	0.99	21634	72688	16839	6511	2	https://kronos.stanford.edu/cgi-bin/blast_html4?Db=/seq_db/static/ind_MOUSE.Tryp.TMT.REVUniprot20150423.CONTAM.fasta.hdr&Pep=SPSMSTTETK&MassType=0	https://kronos.stanford.edu/gfy/www/modules/show_out/show_out_wrapper.php?run_id=&search_id=&scans_id=&peptide_id=&scanf=&charge=	https://kronos.stanford.edu/gfy/www/modules/show_out/show_out_wrapper.php?run_id=16841&search_id=21634&scans_id=16839&peptide_id=72688&scanf=6511&charge=2	http://kronos.stanford.edu/gfy/www/modules/sdig/index.php?run_id=16841&search_id=21634&scans_id=16839&peptide_id=72688&scanf=6511	http:/kronos.stanford.edu/gfy/www/modules/ascore/visual/trim-phos.php?run_id=16841&search_id=21634&scans_id=16839&peptide_id=72688&charge=2	297036	0.958935	0.141847	0.346837	0.0828076	0.0814553	4.18847
SH3 domain-containing protein 19 OS=Mus musculus GN=Sh3d19 PE=1 SV=2	sp|Q91X43|SH319_MOUSE	128	S	SVNHETSGGRPMAES|79.97|PDTGK	1	GRPMAES*PDTGKK	1	20.57	2.155	0.1847	0.3042	56.15	NO OTHERS:1	SVNHETSGGRPMAES|79.97|PDTGK	1	0	0	0	SVNHETSGGRPMAESPDTGK	ind_MOUSE.Tryp.TMT.REVUniprot20150423.CONTAM.fasta.hdr	21638	16834	48394	3	16836	21638	48394	16834	3648	3	16836	0.99	21638	48394	16834	3648	3	https://kronos.stanford.edu/cgi-bin/blast_html4?Db=/seq_db/static/ind_MOUSE.Tryp.TMT.REVUniprot20150423.CONTAM.fasta.hdr&Pep=SVNHETSGGRPMAESPDTGK&MassType=0	https://kronos.stanford.edu/gfy/www/modules/show_out/show_out_wrapper.php?run_id=&search_id=&scans_id=&peptide_id=&scanf=&charge=	https://kronos.stanford.edu/gfy/www/modules/show_out/show_out_wrapper.php?run_id=16836&search_id=21638&scans_id=16834&peptide_id=48394&scanf=3648&charge=3	http://kronos.stanford.edu/gfy/www/modules/sdig/index.php?run_id=16836&search_id=21638&scans_id=16834&peptide_id=48394&scanf=3648	http:/kronos.stanford.edu/gfy/www/modules/ascore/visual/trim-phos.php?run_id=16836&search_id=21638&scans_id=16834&peptide_id=48394&charge=3	967326	0.964452	0.0780478	0.489523	0.116892	0.113531	4.18782
Dysferlin OS=Mus musculus GN=Dysf PE=4 SV=1	tr|E9PXU9|E9PXU9_MOUSE	194	S	KPPS|79.97|HPPPHYPGAK	1	TPRKPPS*HPPPHY	1	58.86	2.6473	0.3764	0.3764	59.8	NO OTHERS:1	KPPS|79.97|HPPPHYPGAK	1	0	0	5	KPPSHPPPHYPGAK	ind_MOUSE.Tryp.TMT.REVUniprot20150423.CONTAM.fasta.hdr	21634	16839	63004	3	16841	21634	63004	16839	4539	3	16841	0.99	21634	63004	16839	4539	3	https://kronos.stanford.edu/cgi-bin/blast_html4?Db=/seq_db/static/ind_MOUSE.Tryp.TMT.REVUniprot20150423.CONTAM.fasta.hdr&Pep=KPPSHPPPHYPGAK&MassType=0	https://kronos.stanford.edu/gfy/www/modules/show_out/show_out_wrapper.php?run_id=&search_id=&scans_id=&peptide_id=&scanf=&charge=	https://kronos.stanford.edu/gfy/www/modules/show_out/show_out_wrapper.php?run_id=16841&search_id=21634&scans_id=16839&peptide_id=63004&scanf=4539&charge=3	http://kronos.stanford.edu/gfy/www/modules/sdig/index.php?run_id=16841&search_id=21634&scans_id=16839&peptide_id=63004&scanf=4539	http:/kronos.stanford.edu/gfy/www/modules/ascore/visual/trim-phos.php?run_id=16841&search_id=21634&scans_id=16839&peptide_id=63004&charge=3	746360	0.932447	0.0905581	0.3792	0.0905595	0.184789	4.1873
Septin-9 OS=Mus musculus GN=Sept9 PE=1 SV=1	tr|A2A6U3|A2A6U3_MOUSE	71	S	SPKPS|79.97|LR	1	QRSPKPS*LRRVEL	1	25.37	1.4835	0.2325	0.2325	23.19	NO OTHERS:1	SPKPS|79.97|LR	1	0	0	2	SPKPSLR	ind_MOUSE.Tryp.TMT.REVUniprot20150423.CONTAM.fasta.hdr	21634	16839	71260	2	16841	21634	71260	16839	5742	2	16841	0.99	21634	71260	16839	5742	2	https://kronos.stanford.edu/cgi-bin/blast_html4?Db=/seq_db/static/ind_MOUSE.Tryp.TMT.REVUniprot20150423.CONTAM.fasta.hdr&Pep=SPKPSLR&MassType=0	https://kronos.stanford.edu/gfy/www/modules/show_out/show_out_wrapper.php?run_id=&search_id=&scans_id=&peptide_id=&scanf=&charge=	https://kronos.stanford.edu/gfy/www/modules/show_out/show_out_wrapper.php?run_id=16841&search_id=21634&scans_id=16839&peptide_id=71260&scanf=5742&charge=2	http://kronos.stanford.edu/gfy/www/modules/sdig/index.php?run_id=16841&search_id=21634&scans_id=16839&peptide_id=71260&scanf=5742	http:/kronos.stanford.edu/gfy/www/modules/ascore/visual/trim-phos.php?run_id=16841&search_id=21634&scans_id=16839&peptide_id=71260&charge=2	1.18464e+06	0.871633	0.156265	0.288666	0.0689392	0.0923873	4.18725
Protein Sec16a OS=Mus musculus GN=Sec16a PE=1 SV=1	tr|A2AIX1|A2AIX1_MOUSE	127	S	ADASLFPPAS|79.97|TPSSLPGLEVSR	1	SLFPPAS*TPSSLP	2	0	3.6754	0.0002	0.6329	56.9	NO OTHERS:2	NONE > ascore = 13	2	0	0	1	ADASLFPPASTPSSLPGLEVSR	ind_MOUSE.Tryp.TMT.REVUniprot20150423.CONTAM.fasta.hdr	21636	16836	42002	2	16838	21636	42002	16836	33572	2	16838	0.99	21636	42002	16836	33572	2	https://kronos.stanford.edu/cgi-bin/blast_html4?Db=/seq_db/static/ind_MOUSE.Tryp.TMT.REVUniprot20150423.CONTAM.fasta.hdr&Pep=ADASLFPPASTPSSLPGLEVSR&MassType=0	https://kronos.stanford.edu/gfy/www/modules/show_out/show_out_wrapper.php?run_id=&search_id=&scans_id=&peptide_id=&scanf=&charge=	https://kronos.stanford.edu/gfy/www/modules/show_out/show_out_wrapper.php?run_id=16838&search_id=21636&scans_id=16836&peptide_id=42002&scanf=33572&charge=2	http://kronos.stanford.edu/gfy/www/modules/sdig/index.php?run_id=16838&search_id=21636&scans_id=16836&peptide_id=42002&scanf=33572	http:/kronos.stanford.edu/gfy/www/modules/ascore/visual/trim-phos.php?run_id=16838&search_id=21636&scans_id=16836&peptide_id=42002&charge=2	547310	0.995169	0.108276	0.370173	0.0887915	0.116866	4.16901
pre-mRNA 3' end-processing protein WDR33 OS=Mus musculus GN=Wdr33 PE=1 SV=2	##tr|D3YX80|D3YX80_MOUSE	61	S	NDTPS|79.97|FS|79.97|AERIAEK	1	FKNDTPS*FSAERI	1	16.19	2.6386	0.2602	0.2602	15.41	2 days, 15:01:00	NDTPS|79.97|FS|79.97|AERIAEK	0	1	0	1	NDTPSFSAERIAEK	ind_MOUSE.Tryp.TMT.REVUniprot20150423.CONTAM.fasta.hdr	21638	16834	14109	3	16836	21638	14109	16834	17808	3	16836	0.99	21638	14109	16834	17808	3	https://kronos.stanford.edu/cgi-bin/blast_html4?Db=/seq_db/static/ind_MOUSE.Tryp.TMT.REVUniprot20150423.CONTAM.fasta.hdr&Pep=NDTPSFSAERIAEK&MassType=0	https://kronos.stanford.edu/gfy/www/modules/show_out/show_out_wrapper.php?run_id=&search_id=&scans_id=&peptide_id=&scanf=&charge=	https://kronos.stanford.edu/gfy/www/modules/show_out/show_out_wrapper.php?run_id=16836&search_id=21638&scans_id=16834&peptide_id=14109&scanf=17808&charge=3	http://kronos.stanford.edu/gfy/www/modules/sdig/index.php?run_id=16836&search_id=21638&scans_id=16834&peptide_id=14109&scanf=17808	http:/kronos.stanford.edu/gfy/www/modules/ascore/visual/trim-phos.php?run_id=16836&search_id=21638&scans_id=16834&peptide_id=14109&charge=3	1.20285e+06	0.861786	0.0684745	0.38396	0.0925442	0.226003	4.14894
pre-mRNA 3' end-processing protein WDR33 OS=Mus musculus GN=Wdr33 PE=1 SV=2	##tr|D3YX80|D3YX80_MOUSE	63	S	NDTPS|79.97|FS|79.97|AERIAEK	2	NDTPSFS*AERIAE	1		2.6386	0.2602	0.2602	15.41	2 days, 13:01:00	NONE > ascore = 13	0	1	0	1	NDTPSFSAERIAEK	ind_MOUSE.Tryp.TMT.REVUniprot20150423.CONTAM.fasta.hdr	21638	16834	14109	3	16836	21638	14109	16834	17808	3	16836	0.99	21638	14109	16834	17808	3	https://kronos.stanford.edu/cgi-bin/blast_html4?Db=/seq_db/static/ind_MOUSE.Tryp.TMT.REVUniprot20150423.CONTAM.fasta.hdr&Pep=NDTPSFSAERIAEK&MassType=0	https://kronos.stanford.edu/gfy/www/modules/show_out/show_out_wrapper.php?run_id=&search_id=&scans_id=&peptide_id=&scanf=&charge=	https://kronos.stanford.edu/gfy/www/modules/show_out/show_out_wrapper.php?run_id=16836&search_id=21638&scans_id=16834&peptide_id=14109&scanf=17808&charge=3	http://kronos.stanford.edu/gfy/www/modules/sdig/index.php?run_id=16836&search_id=21638&scans_id=16834&peptide_id=14109&scanf=17808	http:/kronos.stanford.edu/gfy/www/modules/ascore/visual/trim-phos.php?run_id=16836&search_id=21638&scans_id=16834&peptide_id=14109&charge=3	1.20285e+06	0.861786	0.0684745	0.38396	0.0925442	0.226003	4.14894
Drebrin OS=Mus musculus GN=Dbn1 PE=1 SV=4	sp|Q9QXS6|DREB_MOUSE	383	T	MAPTPIPT|79.97|RSPSDSSTASTPIAEQIER	1	APTPIPT*RSPSDS	2	10.69	3.9864	0.0055	0.4881	72.87	NO OTHERS:2	NONE > ascore = 13	2	0	0	1	MAPTPIPTRSPSDSSTASTPIAEQIER	ind_MOUSE.Tryp.TMT.REVUniprot20150423.CONTAM.fasta.hdr	21636	16836	12863	3		21636	12863	16836	17342	3		0.99	21636	12863	16836	18730	3	https://kronos.stanford.edu/cgi-bin/blast_html4?Db=/seq_db/static/ind_MOUSE.Tryp.TMT.REVUniprot20150423.CONTAM.fasta.hdr&Pep=MAPTPIPTRSPSDSSTASTPIAEQIER&MassType=0	https://kronos.stanford.edu/gfy/www/modules/show_out/show_out_wrapper.php?run_id=&search_id=&scans_id=&peptide_id=&scanf=&charge=	https://kronos.stanford.edu/gfy/www/modules/show_out/show_out_wrapper.php?run_id=&search_id=21636&scans_id=16836&peptide_id=12863&scanf=17342&charge=3	http://kronos.stanford.edu/gfy/www/modules/sdig/index.php?run_id=&search_id=21636&scans_id=16836&peptide_id=12863&scanf=17342	http:/kronos.stanford.edu/gfy/www/modules/ascore/visual/trim-phos.php?run_id=&search_id=21636&scans_id=16836&peptide_id=12863&charge=3	2.17006e+06	0.847133	0.0990563	0.31313	0.0755219	0.087693	4.14621
NAD-dependent protein deacetylase sirtuin-2 OS=Mus musculus GN=Sirt2 PE=1 SV=2	sp|Q8VDQ8|SIR2_MOUSE	372	S	EHANIDAQSGSQAPNPSTTISPGKS|79.97|PPPAK	1	TISPGKS*PPPAKE	2	5.61	5.9274	0.0022	0.1329	73.28	NO OTHERS:2	NONE > ascore = 13	2	0	0	2	EHANIDAQSGSQAPNPSTTISPGKSPPPAK	ind_MOUSE.Tryp.TMT.REVUniprot20150423.CONTAM.fasta.hdr	21636	16836	1241	4		21636	1241	16836	10678	4		0.99	21636	1241	16836	10299	4	https://kronos.stanford.edu/cgi-bin/blast_html4?Db=/seq_db/static/ind_MOUSE.Tryp.TMT.REVUniprot20150423.CONTAM.fasta.hdr&Pep=EHANIDAQSGSQAPNPSTTISPGKSPPPAK&MassType=0	https://kronos.stanford.edu/gfy/www/modules/show_out/show_out_wrapper.php?run_id=&search_id=&scans_id=&peptide_id=&scanf=&charge=	https://kronos.stanford.edu/gfy/www/modules/show_out/show_out_wrapper.php?run_id=&search_id=21636&scans_id=16836&peptide_id=1241&scanf=10678&charge=4	http://kronos.stanford.edu/gfy/www/modules/sdig/index.php?run_id=&search_id=21636&scans_id=16836&peptide_id=1241&scanf=10678	http:/kronos.stanford.edu/gfy/www/modules/ascore/visual/trim-phos.php?run_id=&search_id=21636&scans_id=16836&peptide_id=1241&charge=4	627041	0.964779	0.0931246	0.390997	0.0943458	0.159157	4.14429
C-Jun-amino-terminal kinase-interacting protein 4 OS=Mus musculus GN=Spag9 PE=1 SV=1	tr|E9PUD1|E9PUD1_MOUSE	553	S	DGGS|79.97|VVGASVFYK	1	KTRDGGS*VVGASV	1	74.72	2.8243	0.3071	0.3923	58.33	NO OTHERS:1	DGGS|79.97|VVGASVFYK	1	0	0	10	DGGSVVGASVFYK	ind_MOUSE.Tryp.TMT.REVUniprot20150423.CONTAM.fasta.hdr	21636	16836	29455	3	16838	21636	29455	16836	26570	3	16838	0.99	21636	29455	16836	26570	3	https://kronos.stanford.edu/cgi-bin/blast_html4?Db=/seq_db/static/ind_MOUSE.Tryp.TMT.REVUniprot20150423.CONTAM.fasta.hdr&Pep=DGGSVVGASVFYK&MassType=0	https://kronos.stanford.edu/gfy/www/modules/show_out/show_out_wrapper.php?run_id=&search_id=&scans_id=&peptide_id=&scanf=&charge=	https://kronos.stanford.edu/gfy/www/modules/show_out/show_out_wrapper.php?run_id=16838&search_id=21636&scans_id=16836&peptide_id=29455&scanf=26570&charge=3	http://kronos.stanford.edu/gfy/www/modules/sdig/index.php?run_id=16838&search_id=21636&scans_id=16836&peptide_id=29455&scanf=26570	http:/kronos.stanford.edu/gfy/www/modules/ascore/visual/trim-phos.php?run_id=16838&search_id=21636&scans_id=16836&peptide_id=29455&charge=3	108432	0.920429	0.0982886	0.357779	0.08658	0.141938	4.13236
Calpastatin OS=Mus musculus GN=Cast PE=1 SV=2	sp|P51125|ICAL_MOUSE	83	S	VTASSAATSKSPS|79.97|MSTTETK	1	ATSKSPS*MSTTET	1	10.36	2.8676	0.0749	0.3945	50.21	NO OTHERS:1	NONE > ascore = 13	1	0	0	4	VTASSAATSKSPSMSTTETK	ind_MOUSE.Tryp.TMT.REVUniprot20150423.CONTAM.fasta.hdr	21636	16836	75811	2	16838	21636	75811	16836	7100	2	16838	0.99	21636	75811	16836	7100	2	https://kronos.stanford.edu/cgi-bin/blast_html4?Db=/seq_db/static/ind_MOUSE.Tryp.TMT.REVUniprot20150423.CONTAM.fasta.hdr&Pep=VTASSAATSKSPSMSTTETK&MassType=0	https://kronos.stanford.edu/gfy/www/modules/show_out/show_out_wrapper.php?run_id=&search_id=&scans_id=&peptide_id=&scanf=&charge=	https://kronos.stanford.edu/gfy/www/modules/show_out/show_out_wrapper.php?run_id=16838&search_id=21636&scans_id=16836&peptide_id=75811&scanf=7100&charge=2	http://kronos.stanford.edu/gfy/www/modules/sdig/index.php?run_id=16838&search_id=21636&scans_id=16836&peptide_id=75811&scanf=7100	http:/kronos.stanford.edu/gfy/www/modules/ascore/visual/trim-phos.php?run_id=16838&search_id=21636&scans_id=16836&peptide_id=75811&charge=2	128328	0.940925	0.142353	0.342041	0.0830103	0.0936078	4.12046
Disintegrin and metalloproteinase domain-containing protein 17 OS=Mus musculus GN=Adam17 PE=1 SV=1	tr|E9PXU2|E9PXU2_MOUSE	754	T	IIKPFPAPQT|79.97|PGR	1	PFPAPQT*PGRLQA	1	1000	3.1004	0.278	0.278	52.39	NO OTHERS:1	IIKPFPAPQT|79.97|PGR	1	0	0	1	IIKPFPAPQTPGR	ind_MOUSE.Tryp.TMT.REVUniprot20150423.CONTAM.fasta.hdr	21634	16839	16923	3	16841	21634	16923	16839	19347	3	16841	0.99	21634	16923	16839	19347	3	https://kronos.stanford.edu/cgi-bin/blast_html4?Db=/seq_db/static/ind_MOUSE.Tryp.TMT.REVUniprot20150423.CONTAM.fasta.hdr&Pep=IIKPFPAPQTPGR&MassType=0	https://kronos.stanford.edu/gfy/www/modules/show_out/show_out_wrapper.php?run_id=&search_id=&scans_id=&peptide_id=&scanf=&charge=	https://kronos.stanford.edu/gfy/www/modules/show_out/show_out_wrapper.php?run_id=16841&search_id=21634&scans_id=16839&peptide_id=16923&scanf=19347&charge=3	http://kronos.stanford.edu/gfy/www/modules/sdig/index.php?run_id=16841&search_id=21634&scans_id=16839&peptide_id=16923&scanf=19347	http:/kronos.stanford.edu/gfy/www/modules/ascore/visual/trim-phos.php?run_id=16841&search_id=21634&scans_id=16839&peptide_id=16923&charge=3	1.0311e+06	0.416449	0.219442	0.19418	0.0471315	0.0628199	4.11997
Protein Ahnak OS=Mus musculus GN=Ahnak PE=1 SV=1	tr|E9Q616|E9Q616_MOUSE	4833	T	QGFDLNIPGGEIDT|79.97|SLK	1	PGGEIDT*SLKAPD	3	13.27	2.5175	0.0154	0.0154	49.24	NO OTHERS:3	QGFDLNIPGGEIDT|79.97|SLK	3	0	0	0	QGFDLNIPGGEIDTSLK	ind_MOUSE.Tryp.TMT.REVUniprot20150423.CONTAM.fasta.hdr	21638	16834	38524	3		21637	33160	16835	28224	3		0.99	21638	35687	16834	29615	3	https://kronos.stanford.edu/cgi-bin/blast_html4?Db=/seq_db/static/ind_MOUSE.Tryp.TMT.REVUniprot20150423.CONTAM.fasta.hdr&Pep=QGFDLNIPGGEIDTSLK&MassType=0	https://kronos.stanford.edu/gfy/www/modules/show_out/show_out_wrapper.php?run_id=&search_id=&scans_id=&peptide_id=&scanf=&charge=	https://kronos.stanford.edu/gfy/www/modules/show_out/show_out_wrapper.php?run_id=&search_id=21637&scans_id=16835&peptide_id=33160&scanf=28224&charge=3	http://kronos.stanford.edu/gfy/www/modules/sdig/index.php?run_id=&search_id=21637&scans_id=16835&peptide_id=33160&scanf=28224	http:/kronos.stanford.edu/gfy/www/modules/ascore/visual/trim-phos.php?run_id=&search_id=21638&scans_id=16834&peptide_id=38524&charge=3	2.5434e+06	0.987307	0.0942214	0.419104	0.102563	0.123782	4.0863
Isoform 2 of Calpain-15 OS=Mus musculus GN=Capn15	sp|Q9JLG8-2|CAN15_MOUSE	959	S	LLAPLSTPPTASS|79.97|PSAGVPR	1	TPPTASS*PSAGVP	1	0	2.9885	0.003	0.4285	38.33	NO OTHERS:1	NONE > ascore = 13	1	0	0	0	LLAPLSTPPTASSPSAGVPR	ind_MOUSE.Tryp.TMT.REVUniprot20150423.CONTAM.fasta.hdr	21634	16839	32413	2	16841	21634	32413	16839	27682	2	16841	0.99	21634	32413	16839	27682	2	https://kronos.stanford.edu/cgi-bin/blast_html4?Db=/seq_db/static/ind_MOUSE.Tryp.TMT.REVUniprot20150423.CONTAM.fasta.hdr&Pep=LLAPLSTPPTASSPSAGVPR&MassType=0	https://kronos.stanford.edu/gfy/www/modules/show_out/show_out_wrapper.php?run_id=&search_id=&scans_id=&peptide_id=&scanf=&charge=	https://kronos.stanford.edu/gfy/www/modules/show_out/show_out_wrapper.php?run_id=16841&search_id=21634&scans_id=16839&peptide_id=32413&scanf=27682&charge=2	http://kronos.stanford.edu/gfy/www/modules/sdig/index.php?run_id=16841&search_id=21634&scans_id=16839&peptide_id=32413&scanf=27682	http:/kronos.stanford.edu/gfy/www/modules/ascore/visual/trim-phos.php?run_id=16841&search_id=21634&scans_id=16839&peptide_id=32413&charge=2	306146	0.995647	0.0828832	0.391204	0.0962182	0.117304	4.0658
B-cell CLL/lymphoma 9 protein OS=Mus musculus GN=Bcl9 PE=1 SV=3	sp|Q9D219|BCL9_MOUSE	753	S	LRPGS|79.97|SEMLPAQQK	1	MKLRPGS*SEMLPA	1	13.24	1.5157	0.0009	0.3192	37.84	NO OTHERS:1	LRPGS|79.97|SEMLPAQQK	1	0	0	0	LRPGSSEMLPAQQK	ind_MOUSE.Tryp.TMT.REVUniprot20150423.CONTAM.fasta.hdr	21634	16839	5050	2	16841	21634	5050	16839	12612	2	16841	0.99	21634	5050	16839	12612	2	https://kronos.stanford.edu/cgi-bin/blast_html4?Db=/seq_db/static/ind_MOUSE.Tryp.TMT.REVUniprot20150423.CONTAM.fasta.hdr&Pep=LRPGSSEMLPAQQK&MassType=0	https://kronos.stanford.edu/gfy/www/modules/show_out/show_out_wrapper.php?run_id=&search_id=&scans_id=&peptide_id=&scanf=&charge=	https://kronos.stanford.edu/gfy/www/modules/show_out/show_out_wrapper.php?run_id=16841&search_id=21634&scans_id=16839&peptide_id=5050&scanf=12612&charge=2	http://kronos.stanford.edu/gfy/www/modules/sdig/index.php?run_id=16841&search_id=21634&scans_id=16839&peptide_id=5050&scanf=12612	http:/kronos.stanford.edu/gfy/www/modules/ascore/visual/trim-phos.php?run_id=16841&search_id=21634&scans_id=16839&peptide_id=5050&charge=2	356911	0.961405	0.149463	0.376387	0.0931087	0.111017	4.04245
Growth factor receptor-bound protein 14 (Fragment) OS=Mus musculus GN=Grb14 PE=1 SV=1	tr|A2ASX3|A2ASX3_MOUSE	51	S	LGNHGS|79.97|PSAPSQSSAVNMALHR	1	RLGNHGS*PSAPSQ	1	13.27	2.6659	0.01	0.5379	35.47	NO OTHERS:1	LGNHGS|79.97|PSAPSQSSAVNMALHR	1	0	0	2	LGNHGSPSAPSQSSAVNMALHR	ind_MOUSE.Tryp.TMT.REVUniprot20150423.CONTAM.fasta.hdr	21634	16839	78460	2	16841	21634	78460	16839	9694	2	16841	0.99	21634	78460	16839	9694	2	https://kronos.stanford.edu/cgi-bin/blast_html4?Db=/seq_db/static/ind_MOUSE.Tryp.TMT.REVUniprot20150423.CONTAM.fasta.hdr&Pep=LGNHGSPSAPSQSSAVNMALHR&MassType=0	https://kronos.stanford.edu/gfy/www/modules/show_out/show_out_wrapper.php?run_id=&search_id=&scans_id=&peptide_id=&scanf=&charge=	https://kronos.stanford.edu/gfy/www/modules/show_out/show_out_wrapper.php?run_id=16841&search_id=21634&scans_id=16839&peptide_id=78460&scanf=9694&charge=2	http://kronos.stanford.edu/gfy/www/modules/sdig/index.php?run_id=16841&search_id=21634&scans_id=16839&peptide_id=78460&scanf=9694	http:/kronos.stanford.edu/gfy/www/modules/ascore/visual/trim-phos.php?run_id=16841&search_id=21634&scans_id=16839&peptide_id=78460&charge=2	155543	0.998322	0.085191	0.407982	0.101399	0.100225	4.02355
Rab-3A-interacting protein OS=Mus musculus GN=Rab3ip PE=1 SV=1	sp|Q68EF0|RAB3I_MOUSE	215	S	TLVLSSS|79.97|PTSPTQEPLAAAK	1	TLVLSSS*PTSPTQ	1	11.56	3.3978	0.0338	0.5504	55.16	NO OTHERS:1	NONE > ascore = 13	1	0	0	0	TLVLSSSPTSPTQEPLAAAK	ind_MOUSE.Tryp.TMT.REVUniprot20150423.CONTAM.fasta.hdr	21634	16839	27660	2	16841	21634	27660	16839	24990	2	16841	0.99	21634	27660	16839	24990	2	https://kronos.stanford.edu/cgi-bin/blast_html4?Db=/seq_db/static/ind_MOUSE.Tryp.TMT.REVUniprot20150423.CONTAM.fasta.hdr&Pep=TLVLSSSPTSPTQEPLAAAK&MassType=0	https://kronos.stanford.edu/gfy/www/modules/show_out/show_out_wrapper.php?run_id=&search_id=&scans_id=&peptide_id=&scanf=&charge=	https://kronos.stanford.edu/gfy/www/modules/show_out/show_out_wrapper.php?run_id=16841&search_id=21634&scans_id=16839&peptide_id=27660&scanf=24990&charge=2	http://kronos.stanford.edu/gfy/www/modules/sdig/index.php?run_id=16841&search_id=21634&scans_id=16839&peptide_id=27660&scanf=24990	http:/kronos.stanford.edu/gfy/www/modules/ascore/visual/trim-phos.php?run_id=16841&search_id=21634&scans_id=16839&peptide_id=27660&charge=2	659937	0.946669	0.102651	0.336308	0.0836303	0.0817445	4.02136
Centrosomal protein of 170 kDa protein B OS=Mus musculus GN=Cep170b PE=1 SV=2	sp|Q80U49|C170B_MOUSE	1341	S	EIHDVAGDGDSLGS|79.97|PGPTRS|79.97|PSLGNVPNTPASTISAR	1	DGDSLGS*PGPTRS	1	1.49	4.0593	0.0157	0.1678	27.14	56 days, 3:01:00	NONE > ascore = 13	0	1	0	1	EIHDVAGDGDSLGSPGPTRSPSLGNVPNTPASTISAR	ind_MOUSE.Tryp.TMT.REVUniprot20150423.CONTAM.fasta.hdr	21638	16834	21661	4	16836	21638	21661	16834	22164	4	16836	0.99	21638	21661	16834	22164	4	https://kronos.stanford.edu/cgi-bin/blast_html4?Db=/seq_db/static/ind_MOUSE.Tryp.TMT.REVUniprot20150423.CONTAM.fasta.hdr&Pep=EIHDVAGDGDSLGSPGPTRSPSLGNVPNTPASTISAR&MassType=0	https://kronos.stanford.edu/gfy/www/modules/show_out/show_out_wrapper.php?run_id=&search_id=&scans_id=&peptide_id=&scanf=&charge=	https://kronos.stanford.edu/gfy/www/modules/show_out/show_out_wrapper.php?run_id=16836&search_id=21638&scans_id=16834&peptide_id=21661&scanf=22164&charge=4	http://kronos.stanford.edu/gfy/www/modules/sdig/index.php?run_id=16836&search_id=21638&scans_id=16834&peptide_id=21661&scanf=22164	http:/kronos.stanford.edu/gfy/www/modules/ascore/visual/trim-phos.php?run_id=16836&search_id=21638&scans_id=16834&peptide_id=21661&charge=4	414299	0.983588	0.0979735	0.3745	0.0935651	0.143575	4.00256
Protein Dnajc21 OS=Mus musculus GN=Dnajc21 PE=1 SV=1	tr|E9Q8D0|E9Q8D0_MOUSE	512	S	APS|79.97|ATASLNSVTR	1	GHARAPS*ATASLN	1	30.7	1.8376	0.1105	0.4334	29.37	NO OTHERS:1	APS|79.97|ATASLNSVTR	1	0	0	1	APSATASLNSVTR	ind_MOUSE.Tryp.TMT.REVUniprot20150423.CONTAM.fasta.hdr	21637	16835	7830	2	16837	21637	7830	16835	14163	2	16837	0.99	21637	7830	16835	14163	2	https://kronos.stanford.edu/cgi-bin/blast_html4?Db=/seq_db/static/ind_MOUSE.Tryp.TMT.REVUniprot20150423.CONTAM.fasta.hdr&Pep=APSATASLNSVTR&MassType=0	https://kronos.stanford.edu/gfy/www/modules/show_out/show_out_wrapper.php?run_id=&search_id=&scans_id=&peptide_id=&scanf=&charge=	https://kronos.stanford.edu/gfy/www/modules/show_out/show_out_wrapper.php?run_id=16837&search_id=21637&scans_id=16835&peptide_id=7830&scanf=14163&charge=2	http://kronos.stanford.edu/gfy/www/modules/sdig/index.php?run_id=16837&search_id=21637&scans_id=16835&peptide_id=7830&scanf=14163	http:/kronos.stanford.edu/gfy/www/modules/ascore/visual/trim-phos.php?run_id=16837&search_id=21637&scans_id=16835&peptide_id=7830&charge=2	1.99062e+06	0.968474	0.0968402	0.467345	0.117403	0.0870395	3.9807
Vinculin OS=Mus musculus GN=Vcl PE=1 SV=4	sp|Q64727|VINC_MOUSE	290	S	DPNAS|79.97|PGDAGEQAIR	1	LRDPNAS*PGDAGE	5	1000	3.4617	0.4758	0.4758	76.18	NO OTHERS:5	DPNAS|79.97|PGDAGEQAIR, GWLRDPNAS|79.97|PGDAGEQAIR	5	0	0	0	DPNASPGDAGEQAIR	ind_MOUSE.Tryp.TMT.REVUniprot20150423.CONTAM.fasta.hdr	21639	16833	1761	2	16835	21638	14927	16834	18317	3	16836	0.99	21638	14927	16834	18317	3	https://kronos.stanford.edu/cgi-bin/blast_html4?Db=/seq_db/static/ind_MOUSE.Tryp.TMT.REVUniprot20150423.CONTAM.fasta.hdr&Pep=DPNASPGDAGEQAIR&MassType=0	https://kronos.stanford.edu/gfy/www/modules/show_out/show_out_wrapper.php?run_id=&search_id=&scans_id=&peptide_id=&scanf=&charge=	https://kronos.stanford.edu/gfy/www/modules/show_out/show_out_wrapper.php?run_id=16836&search_id=21638&scans_id=16834&peptide_id=14927&scanf=18317&charge=3	http://kronos.stanford.edu/gfy/www/modules/sdig/index.php?run_id=16836&search_id=21638&scans_id=16834&peptide_id=14927&scanf=18317	http:/kronos.stanford.edu/gfy/www/modules/ascore/visual/trim-phos.php?run_id=16835&search_id=21639&scans_id=16833&peptide_id=1761&charge=2	3.80254e+06	0.870713	0.0472667	0.363705	0.0915048	0.105645	3.97471
DNA helicase B OS=Mus musculus GN=Helb PE=1 SV=2	sp|Q6NVF4|HELB_MOUSE	992	T	WLSASVNDDVDT|79.97|DEESAQLR	1	VNDDVDT*DEESAQ	1	25.12	3.6972	0.2913	0.4609	63.93	NO OTHERS:1	WLSASVNDDVDT|79.97|DEESAQLR	1	0	0	0	WLSASVNDDVDTDEESAQLR	ind_MOUSE.Tryp.TMT.REVUniprot20150423.CONTAM.fasta.hdr	21639	16833	41498	3	16835	21639	41498	16833	31866	3	16835	0.99	21639	41498	16833	31866	3	https://kronos.stanford.edu/cgi-bin/blast_html4?Db=/seq_db/static/ind_MOUSE.Tryp.TMT.REVUniprot20150423.CONTAM.fasta.hdr&Pep=WLSASVNDDVDTDEESAQLR&MassType=0	https://kronos.stanford.edu/gfy/www/modules/show_out/show_out_wrapper.php?run_id=&search_id=&scans_id=&peptide_id=&scanf=&charge=	https://kronos.stanford.edu/gfy/www/modules/show_out/show_out_wrapper.php?run_id=16835&search_id=21639&scans_id=16833&peptide_id=41498&scanf=31866&charge=3	http://kronos.stanford.edu/gfy/www/modules/sdig/index.php?run_id=16835&search_id=21639&scans_id=16833&peptide_id=41498&scanf=31866	http:/kronos.stanford.edu/gfy/www/modules/ascore/visual/trim-phos.php?run_id=16835&search_id=21639&scans_id=16833&peptide_id=41498&charge=3	146124	0.96366	0.114062	0.359415	0.0909977	0.152913	3.94971
Microtubule-associated protein 6 OS=Mus musculus GN=Map6 PE=1 SV=2	sp|Q7TSJ2|MAP6_MOUSE	632	S	GQS|79.97|PTAPGPTK	1	GSLKGQS*PTAPGP	2	24.75	2.1761	0.0947	0.4445	42.48	NO OTHERS:2	GQS|79.97|PTAPGPTK	2	0	0	0	GQSPTAPGPTK	ind_MOUSE.Tryp.TMT.REVUniprot20150423.CONTAM.fasta.hdr	21637	16835	78278	2		21638	80510	16834	6845	2	16836	0.99	21637	78278	16835	6845	2	https://kronos.stanford.edu/cgi-bin/blast_html4?Db=/seq_db/static/ind_MOUSE.Tryp.TMT.REVUniprot20150423.CONTAM.fasta.hdr&Pep=GQSPTAPGPTK&MassType=0	https://kronos.stanford.edu/gfy/www/modules/show_out/show_out_wrapper.php?run_id=&search_id=&scans_id=&peptide_id=&scanf=&charge=	https://kronos.stanford.edu/gfy/www/modules/show_out/show_out_wrapper.php?run_id=16836&search_id=21638&scans_id=16834&peptide_id=80510&scanf=6845&charge=2	http://kronos.stanford.edu/gfy/www/modules/sdig/index.php?run_id=16836&search_id=21638&scans_id=16834&peptide_id=80510&scanf=6845	http:/kronos.stanford.edu/gfy/www/modules/ascore/visual/trim-phos.php?run_id=&search_id=21637&scans_id=16835&peptide_id=78278&charge=2	8.2311e+06	0.928334	0.0742037	0.357363	0.0907318	0.0862361	3.93867
Tensin-like C1 domain-containing phosphatase OS=Mus musculus GN=Tenc1 PE=1 SV=1	sp|Q8CGB6|TENC1_MOUSE	941	S	LS|79.97|PGEALPSVVQGVAEK	1	APTQRLS*PGEALP	2	59.08	2.8378	0.4192	0.4543	70.99	NO OTHERS:2	LS|79.97|PGEALPSVVQGVAEK	2	0	0	3	LSPGEALPSVVQGVAEK	ind_MOUSE.Tryp.TMT.REVUniprot20150423.CONTAM.fasta.hdr	21636	16836	41988	3		21636	41988	16836	33564	3		0.99	21636	41988	16836	35598	3	https://kronos.stanford.edu/cgi-bin/blast_html4?Db=/seq_db/static/ind_MOUSE.Tryp.TMT.REVUniprot20150423.CONTAM.fasta.hdr&Pep=LSPGEALPSVVQGVAEK&MassType=0	https://kronos.stanford.edu/gfy/www/modules/show_out/show_out_wrapper.php?run_id=&search_id=&scans_id=&peptide_id=&scanf=&charge=	https://kronos.stanford.edu/gfy/www/modules/show_out/show_out_wrapper.php?run_id=&search_id=21636&scans_id=16836&peptide_id=41988&scanf=33564&charge=3	http://kronos.stanford.edu/gfy/www/modules/sdig/index.php?run_id=&search_id=21636&scans_id=16836&peptide_id=41988&scanf=33564	http:/kronos.stanford.edu/gfy/www/modules/ascore/visual/trim-phos.php?run_id=&search_id=21636&scans_id=16836&peptide_id=41988&charge=3	253707	0.970029	0.101192	0.334181	0.0849726	0.118001	3.93281
UPF0489 protein C5orf22 homolog OS=Mus musculus PE=2 SV=1	sp|Q8BGC1|CE022_MOUSE	285	S	KPDS|79.97|NLPEDGLVDVVEAR	1	QFKKPDS*NLPEDG	1	1000	3.0917	0.3332	0.3332	32.39	NO OTHERS:1	KPDS|79.97|NLPEDGLVDVVEAR	1	0	0	1	KPDSNLPEDGLVDVVEAR	ind_MOUSE.Tryp.TMT.REVUniprot20150423.CONTAM.fasta.hdr	21638	16834	35269	3	16836	21638	35269	16834	29398	3	16836	0.99	21638	35269	16834	29398	3	https://kronos.stanford.edu/cgi-bin/blast_html4?Db=/seq_db/static/ind_MOUSE.Tryp.TMT.REVUniprot20150423.CONTAM.fasta.hdr&Pep=KPDSNLPEDGLVDVVEAR&MassType=0	https://kronos.stanford.edu/gfy/www/modules/show_out/show_out_wrapper.php?run_id=&search_id=&scans_id=&peptide_id=&scanf=&charge=	https://kronos.stanford.edu/gfy/www/modules/show_out/show_out_wrapper.php?run_id=16836&search_id=21638&scans_id=16834&peptide_id=35269&scanf=29398&charge=3	http://kronos.stanford.edu/gfy/www/modules/sdig/index.php?run_id=16836&search_id=21638&scans_id=16834&peptide_id=35269&scanf=29398	http:/kronos.stanford.edu/gfy/www/modules/ascore/visual/trim-phos.php?run_id=16836&search_id=21638&scans_id=16834&peptide_id=35269&charge=3	454170	0.96377	0.0737317	0.379776	0.0965717	0.111896	3.93258
Coiled-coil and C2 domain-containing protein 1B (Fragment) OS=Mus musculus GN=Cc2d1b PE=4 SV=1	tr|F6XC25|F6XC25_MOUSE	436	S	ASS|79.97|SKESLSPSVR	1	TEPKASS*SKESLS	2	0	2.735	0.0679	0.4371	27.92	NO OTHERS:2	NONE > ascore = 13	2	0	0	1	ASSSKESLSPSVR	ind_MOUSE.Tryp.TMT.REVUniprot20150423.CONTAM.fasta.hdr	21637	16835	80977	2	16837	21637	80977	16835	8131	2	16837	0.99	21636	76146	16836	8131	3	https://kronos.stanford.edu/cgi-bin/blast_html4?Db=/seq_db/static/ind_MOUSE.Tryp.TMT.REVUniprot20150423.CONTAM.fasta.hdr&Pep=ASSSKESLSPSVR&MassType=0	https://kronos.stanford.edu/gfy/www/modules/show_out/show_out_wrapper.php?run_id=&search_id=&scans_id=&peptide_id=&scanf=&charge=	https://kronos.stanford.edu/gfy/www/modules/show_out/show_out_wrapper.php?run_id=16837&search_id=21637&scans_id=16835&peptide_id=80977&scanf=8131&charge=2	http://kronos.stanford.edu/gfy/www/modules/sdig/index.php?run_id=16837&search_id=21637&scans_id=16835&peptide_id=80977&scanf=8131	http:/kronos.stanford.edu/gfy/www/modules/ascore/visual/trim-phos.php?run_id=16837&search_id=21637&scans_id=16835&peptide_id=80977&charge=2	3.68644e+06	0.972017	0.14162	0.407762	0.104416	0.0943997	3.90517
Aspartate aminotransferase, mitochondrial OS=Mus musculus GN=Got2 PE=1 SV=1	sp|P05202|AATM_MOUSE	316	Y	ILIRPLY|79.97|SNPPLNGAR	1	ILIRPLY*SNPPLN	2	13.27	3.6447	0.04	0.4568	69.14	NO OTHERS:2	ILIRPLY|79.97|SNPPLNGAR	2	0	0	0	ILIRPLYSNPPLNGAR	ind_MOUSE.Tryp.TMT.REVUniprot20150423.CONTAM.fasta.hdr	21634	16839	46514	3	16841	21634	46514	16839	35575	3	16841	0.99	21634	46514	16839	35575	3	https://kronos.stanford.edu/cgi-bin/blast_html4?Db=/seq_db/static/ind_MOUSE.Tryp.TMT.REVUniprot20150423.CONTAM.fasta.hdr&Pep=ILIRPLYSNPPLNGAR&MassType=0	https://kronos.stanford.edu/gfy/www/modules/show_out/show_out_wrapper.php?run_id=&search_id=&scans_id=&peptide_id=&scanf=&charge=	https://kronos.stanford.edu/gfy/www/modules/show_out/show_out_wrapper.php?run_id=16841&search_id=21634&scans_id=16839&peptide_id=46514&scanf=35575&charge=3	http://kronos.stanford.edu/gfy/www/modules/sdig/index.php?run_id=16841&search_id=21634&scans_id=16839&peptide_id=46514&scanf=35575	http:/kronos.stanford.edu/gfy/www/modules/ascore/visual/trim-phos.php?run_id=16841&search_id=21634&scans_id=16839&peptide_id=46514&charge=3	777798	0.830703	0.0843845	0.328985	0.0844631	0.0759327	3.89501
Heterogeneous nuclear ribonucleoprotein A3 OS=Mus musculus GN=Hnrnpa3 PE=4 SV=1	tr|A2AL12|A2AL12_MOUSE	298	S	SSGS|79.97|PYGGGYGSGGGSGGYGSR	1	GGRSSGS*PYGGGY	1	0	2.8501	0.0192	0.6073	71.74	NO OTHERS:1	NONE > ascore = 13	1	0	0	6	SSGSPYGGGYGSGGGSGGYGSR	ind_MOUSE.Tryp.TMT.REVUniprot20150423.CONTAM.fasta.hdr	21637	16835	78605	2	16837	21637	78605	16835	6808	2	16837	0.99	21637	78605	16835	6808	2	https://kronos.stanford.edu/cgi-bin/blast_html4?Db=/seq_db/static/ind_MOUSE.Tryp.TMT.REVUniprot20150423.CONTAM.fasta.hdr&Pep=SSGSPYGGGYGSGGGSGGYGSR&MassType=0	https://kronos.stanford.edu/gfy/www/modules/show_out/show_out_wrapper.php?run_id=&search_id=&scans_id=&peptide_id=&scanf=&charge=	https://kronos.stanford.edu/gfy/www/modules/show_out/show_out_wrapper.php?run_id=16837&search_id=21637&scans_id=16835&peptide_id=78605&scanf=6808&charge=2	http://kronos.stanford.edu/gfy/www/modules/sdig/index.php?run_id=16837&search_id=21637&scans_id=16835&peptide_id=78605&scanf=6808	http:/kronos.stanford.edu/gfy/www/modules/ascore/visual/trim-phos.php?run_id=16837&search_id=21637&scans_id=16835&peptide_id=78605&charge=2	373815	0.9084	0.184711	0.322792	0.0831524	0.100072	3.88193
TBC1 domain family member 10B OS=Mus musculus GN=Tbc1d10b PE=1 SV=2	sp|Q8BHL3|TB10B_MOUSE	140	T	ASPVPGPGTPTRT|79.97|PSR	1	PGTPTRT*PSRMAP	1	4.35	1.7852	0.0056	0.35	11.51	NO OTHERS:1	NONE > ascore = 13	1	0	0	0	ASPVPGPGTPTRTPSR	ind_MOUSE.Tryp.TMT.REVUniprot20150423.CONTAM.fasta.hdr	21636	16836	74106	2	16838	21636	74106	16836	6124	2	16838	0.99	21636	74106	16836	6124	2	https://kronos.stanford.edu/cgi-bin/blast_html4?Db=/seq_db/static/ind_MOUSE.Tryp.TMT.REVUniprot20150423.CONTAM.fasta.hdr&Pep=ASPVPGPGTPTRTPSR&MassType=0	https://kronos.stanford.edu/gfy/www/modules/show_out/show_out_wrapper.php?run_id=&search_id=&scans_id=&peptide_id=&scanf=&charge=	https://kronos.stanford.edu/gfy/www/modules/show_out/show_out_wrapper.php?run_id=16838&search_id=21636&scans_id=16836&peptide_id=74106&scanf=6124&charge=2	http://kronos.stanford.edu/gfy/www/modules/sdig/index.php?run_id=16838&search_id=21636&scans_id=16836&peptide_id=74106&scanf=6124	http:/kronos.stanford.edu/gfy/www/modules/ascore/visual/trim-phos.php?run_id=16838&search_id=21636&scans_id=16836&peptide_id=74106&charge=2	514486	0.997299	0.105654	0.365567	0.0942653	0.118023	3.87807
DNA excision repair protein ERCC-6-like OS=Mus musculus GN=Ercc6l PE=1 SV=1	sp|Q8BHK9|ERC6L_MOUSE	876	S	ESSKAS|79.97|LGPNLDLQDSVVLYHR	1	RESSKAS*LGPNLD	1	0	3.5878	0.0157	0.3362	62.85	NO OTHERS:1	NONE > ascore = 13	1	0	0	0	ESSKASLGPNLDLQDSVVLYHR	ind_MOUSE.Tryp.TMT.REVUniprot20150423.CONTAM.fasta.hdr	21636	16836	25179	4	16838	21636	25179	16836	24247	4	16838	0.99	21636	25179	16836	24247	4	https://kronos.stanford.edu/cgi-bin/blast_html4?Db=/seq_db/static/ind_MOUSE.Tryp.TMT.REVUniprot20150423.CONTAM.fasta.hdr&Pep=ESSKASLGPNLDLQDSVVLYHR&MassType=0	https://kronos.stanford.edu/gfy/www/modules/show_out/show_out_wrapper.php?run_id=&search_id=&scans_id=&peptide_id=&scanf=&charge=	https://kronos.stanford.edu/gfy/www/modules/show_out/show_out_wrapper.php?run_id=16838&search_id=21636&scans_id=16836&peptide_id=25179&scanf=24247&charge=4	http://kronos.stanford.edu/gfy/www/modules/sdig/index.php?run_id=16838&search_id=21636&scans_id=16836&peptide_id=25179&scanf=24247	http:/kronos.stanford.edu/gfy/www/modules/ascore/visual/trim-phos.php?run_id=16838&search_id=21636&scans_id=16836&peptide_id=25179&charge=4	426656	0.987045	0.0752712	0.395402	0.102321	0.132292	3.86431
Ectonucleotide pyrophosphatase/phosphodiesterase family member 1 OS=Mus musculus GN=Enpp1 PE=4 SV=1	tr|E9QQ26|E9QQ26_MOUSE	25	S	ELES|79.97|PAAAS|79.97|LLAPMDLGEEPLEK	1	NGRELES*PAAASL	8	1000	4.7943	0.113	0.4575	98.01	NO OTHERS:5; 30:3	ELES|79.97|PAAASLLAPMDLGEEPLEK, ELES|79.97|PAAASLLAPMDLGEEPLEKAER, ELES|79.97|PAAAS|79.97|LLAPMDLGEEPLEK, ELES|79.97|PAAAS|79.97|LLAPMDLGEEPLEKAER	5	3	0	3	ELESPAAASLLAPMDLGEEPLEK	ind_MOUSE.Tryp.TMT.REVUniprot20150423.CONTAM.fasta.hdr	21638	16834	54256	3	16836	21638	57781	16834	41393	3	16836	0.99	21638	66239	16834	39286	3	https://kronos.stanford.edu/cgi-bin/blast_html4?Db=/seq_db/static/ind_MOUSE.Tryp.TMT.REVUniprot20150423.CONTAM.fasta.hdr&Pep=ELESPAAASLLAPMDLGEEPLEK&MassType=0	https://kronos.stanford.edu/gfy/www/modules/show_out/show_out_wrapper.php?run_id=&search_id=&scans_id=&peptide_id=&scanf=&charge=	https://kronos.stanford.edu/gfy/www/modules/show_out/show_out_wrapper.php?run_id=16836&search_id=21638&scans_id=16834&peptide_id=57781&scanf=41393&charge=3	http://kronos.stanford.edu/gfy/www/modules/sdig/index.php?run_id=16836&search_id=21638&scans_id=16834&peptide_id=57781&scanf=41393	http:/kronos.stanford.edu/gfy/www/modules/ascore/visual/trim-phos.php?run_id=16836&search_id=21638&scans_id=16834&peptide_id=54256&charge=3	201662	0.837359	0.0699724	0.313595	0.0815327	0.195967	3.84625
Ectonucleotide pyrophosphatase/phosphodiesterase family member 1 OS=Mus musculus GN=Enpp1 PE=4 SV=1	tr|E9QQ26|E9QQ26_MOUSE	30	S	ELES|79.97|PAAAS|79.97|LLAPMDLGEEPLEK	2	ESPAAAS*LLAPMD	4	1000	3.7233	0.4261	0.4261	73.74	NO OTHERS:1; 25:3	ELESPAAAS|79.97|LLAPMDLGEEPLEK, ELES|79.97|PAAAS|79.97|LLAPMDLGEEPLEK, ELES|79.97|PAAAS|79.97|LLAPMDLGEEPLEKAER	1	3	0	3	ELESPAAASLLAPMDLGEEPLEK	ind_MOUSE.Tryp.TMT.REVUniprot20150423.CONTAM.fasta.hdr	21638	16834	54256	3	16836	21638	64604	16834	45047	3	16836	0.99	21638	64604	16834	45047	3	https://kronos.stanford.edu/cgi-bin/blast_html4?Db=/seq_db/static/ind_MOUSE.Tryp.TMT.REVUniprot20150423.CONTAM.fasta.hdr&Pep=ELESPAAASLLAPMDLGEEPLEK&MassType=0	https://kronos.stanford.edu/gfy/www/modules/show_out/show_out_wrapper.php?run_id=&search_id=&scans_id=&peptide_id=&scanf=&charge=	https://kronos.stanford.edu/gfy/www/modules/show_out/show_out_wrapper.php?run_id=16836&search_id=21638&scans_id=16834&peptide_id=64604&scanf=45047&charge=3	http://kronos.stanford.edu/gfy/www/modules/sdig/index.php?run_id=16836&search_id=21638&scans_id=16834&peptide_id=64604&scanf=45047	http:/kronos.stanford.edu/gfy/www/modules/ascore/visual/trim-phos.php?run_id=16836&search_id=21638&scans_id=16834&peptide_id=54256&charge=3	201662	0.837359	0.0699724	0.313595	0.0815327	0.195967	3.84625
MCG50236, isoform CRA_a OS=Mus musculus GN=Zbtb45 PE=2 SV=1	tr|Q52KG4|Q52KG4_MOUSE	130	T	VPNT|79.97|PAPAPLPPPVPPPLAPAQLR	1	RARVPNT*PAPAPL	1	1000	3.8749	0.3107	0.3107	31.89	NO OTHERS:1	VPNT|79.97|PAPAPLPPPVPPPLAPAQLR	1	0	0	0	VPNTPAPAPLPPPVPPPLAPAQLR	ind_MOUSE.Tryp.TMT.REVUniprot20150423.CONTAM.fasta.hdr	21636	16836	1121	3	16838	21636	1121	16836	10601	3	16838	0.99	21636	1121	16836	10601	3	https://kronos.stanford.edu/cgi-bin/blast_html4?Db=/seq_db/static/ind_MOUSE.Tryp.TMT.REVUniprot20150423.CONTAM.fasta.hdr&Pep=VPNTPAPAPLPPPVPPPLAPAQLR&MassType=0	https://kronos.stanford.edu/gfy/www/modules/show_out/show_out_wrapper.php?run_id=&search_id=&scans_id=&peptide_id=&scanf=&charge=	https://kronos.stanford.edu/gfy/www/modules/show_out/show_out_wrapper.php?run_id=16838&search_id=21636&scans_id=16836&peptide_id=1121&scanf=10601&charge=3	http://kronos.stanford.edu/gfy/www/modules/sdig/index.php?run_id=16838&search_id=21636&scans_id=16836&peptide_id=1121&scanf=10601	http:/kronos.stanford.edu/gfy/www/modules/ascore/visual/trim-phos.php?run_id=16838&search_id=21636&scans_id=16836&peptide_id=1121&charge=3	519138	0.907618	0.153264	0.410777	0.106901	0.117436	3.84259
Neurolysin, mitochondrial OS=Mus musculus GN=Nln PE=2 SV=1	sp|Q91YP2|NEUL_MOUSE	32	S	EAAS|79.97|PLQAMSSYTAAGR	1	LGREAAS*PLQAMS	1	67.36	2.6516	0.129	0.3694	61.62	NO OTHERS:1	EAAS|79.97|PLQAMSSYTAAGR	1	0	0	0	EAASPLQAMSSYTAAGR	ind_MOUSE.Tryp.TMT.REVUniprot20150423.CONTAM.fasta.hdr	21637	16835	26388	2	16837	21637	26388	16835	24599	2	16837	0.99	21637	26388	16835	24599	2	https://kronos.stanford.edu/cgi-bin/blast_html4?Db=/seq_db/static/ind_MOUSE.Tryp.TMT.REVUniprot20150423.CONTAM.fasta.hdr&Pep=EAASPLQAMSSYTAAGR&MassType=0	https://kronos.stanford.edu/gfy/www/modules/show_out/show_out_wrapper.php?run_id=&search_id=&scans_id=&peptide_id=&scanf=&charge=	https://kronos.stanford.edu/gfy/www/modules/show_out/show_out_wrapper.php?run_id=16837&search_id=21637&scans_id=16835&peptide_id=26388&scanf=24599&charge=2	http://kronos.stanford.edu/gfy/www/modules/sdig/index.php?run_id=16837&search_id=21637&scans_id=16835&peptide_id=26388&scanf=24599	http:/kronos.stanford.edu/gfy/www/modules/ascore/visual/trim-phos.php?run_id=16837&search_id=21637&scans_id=16835&peptide_id=26388&charge=2	1.39387e+06	0.960776	0.0772964	0.403674	0.105193	0.137557	3.83747
Bcl-2-like protein 13 OS=Mus musculus GN=Bcl2l13 PE=1 SV=2	sp|P59017|B2L13_MOUSE	342	T	T|79.97|SPTPSVFVELGEEELEAVTARPEAVER	1	MMRAEKT*SPTPSV	2	12.22	4.7621	0.0493	0.562	91.2	NO OTHERS:2	NONE > ascore = 13	2	0	0	0	TSPTPSVFVELGEEELEAVTARPEAVER	ind_MOUSE.Tryp.TMT.REVUniprot20150423.CONTAM.fasta.hdr	21638	16834	73733	3	16836	21638	73733	16834	50121	3	16836	0.99	21638	73733	16834	50121	3	https://kronos.stanford.edu/cgi-bin/blast_html4?Db=/seq_db/static/ind_MOUSE.Tryp.TMT.REVUniprot20150423.CONTAM.fasta.hdr&Pep=TSPTPSVFVELGEEELEAVTARPEAVER&MassType=0	https://kronos.stanford.edu/gfy/www/modules/show_out/show_out_wrapper.php?run_id=&search_id=&scans_id=&peptide_id=&scanf=&charge=	https://kronos.stanford.edu/gfy/www/modules/show_out/show_out_wrapper.php?run_id=16836&search_id=21638&scans_id=16834&peptide_id=73733&scanf=50121&charge=3	http://kronos.stanford.edu/gfy/www/modules/sdig/index.php?run_id=16836&search_id=21638&scans_id=16834&peptide_id=73733&scanf=50121	http:/kronos.stanford.edu/gfy/www/modules/ascore/visual/trim-phos.php?run_id=16836&search_id=21638&scans_id=16834&peptide_id=73733&charge=3	560534	0.928773	0.128559	0.299586	0.0781949	0.110615	3.83127
Serine/arginine repetitive matrix protein 2 OS=Mus musculus GN=Srrm2 PE=1 SV=3	sp|Q8BTI8|SRRM2_MOUSE	2537	T	RVPSPT|79.97|PVPK	1	KRVPSPT*PVPKEA	1	22.87	1.7879	0.0603	0.2156	62.62	NO OTHERS:1	RVPSPT|79.97|PVPK	1	0	0	1	RVPSPTPVPK	ind_MOUSE.Tryp.TMT.REVUniprot20150423.CONTAM.fasta.hdr	21634	16839	77884	3	16841	21634	77884	16839	9370	3	16841	0.99	21634	77884	16839	9370	3	https://kronos.stanford.edu/cgi-bin/blast_html4?Db=/seq_db/static/ind_MOUSE.Tryp.TMT.REVUniprot20150423.CONTAM.fasta.hdr&Pep=RVPSPTPVPK&MassType=0	https://kronos.stanford.edu/gfy/www/modules/show_out/show_out_wrapper.php?run_id=&search_id=&scans_id=&peptide_id=&scanf=&charge=	https://kronos.stanford.edu/gfy/www/modules/show_out/show_out_wrapper.php?run_id=16841&search_id=21634&scans_id=16839&peptide_id=77884&scanf=9370&charge=3	http://kronos.stanford.edu/gfy/www/modules/sdig/index.php?run_id=16841&search_id=21634&scans_id=16839&peptide_id=77884&scanf=9370	http:/kronos.stanford.edu/gfy/www/modules/ascore/visual/trim-phos.php?run_id=16841&search_id=21634&scans_id=16839&peptide_id=77884&charge=3	982315	0.941385	0.0448675	0.454351	0.118783	0.086333	3.82505
Isoform E of Tuberin OS=Mus musculus GN=Tsc2	sp|Q61037-6|TSC2_MOUSE	1252	S	S|79.97|LSVPAAGTAKPPTLPR	1	DTALYKS*LSVPAA	1	5.88	2.6162	0.0223	0.292	59.94	NO OTHERS:1	NONE > ascore = 13	1	0	0	2	SLSVPAAGTAKPPTLPR	ind_MOUSE.Tryp.TMT.REVUniprot20150423.CONTAM.fasta.hdr	21634	16839	13150	3	16841	21634	13150	16839	17311	3	16841	0.99	21634	13150	16839	17311	3	https://kronos.stanford.edu/cgi-bin/blast_html4?Db=/seq_db/static/ind_MOUSE.Tryp.TMT.REVUniprot20150423.CONTAM.fasta.hdr&Pep=SLSVPAAGTAKPPTLPR&MassType=0	https://kronos.stanford.edu/gfy/www/modules/show_out/show_out_wrapper.php?run_id=&search_id=&scans_id=&peptide_id=&scanf=&charge=	https://kronos.stanford.edu/gfy/www/modules/show_out/show_out_wrapper.php?run_id=16841&search_id=21634&scans_id=16839&peptide_id=13150&scanf=17311&charge=3	http://kronos.stanford.edu/gfy/www/modules/sdig/index.php?run_id=16841&search_id=21634&scans_id=16839&peptide_id=13150&scanf=17311	http:/kronos.stanford.edu/gfy/www/modules/ascore/visual/trim-phos.php?run_id=16841&search_id=21634&scans_id=16839&peptide_id=13150&charge=3	613829	0.946589	0.0751028	0.343172	0.0905015	0.149497	3.79189
Serine/arginine repetitive matrix protein 2 OS=Mus musculus GN=Srrm2 PE=1 SV=3	sp|Q8BTI8|SRRM2_MOUSE	1276	S	ELS|79.97|HS|79.97|PPRENSFESSLEFK	1	PEHKELS*HSPPRE	1	5.91	2.2475	0.037	0.037	19.42	53 days, 6:01:00	NONE > ascore = 13	0	1	0	2	ELSHSPPRENSFESSLEFK	ind_MOUSE.Tryp.TMT.REVUniprot20150423.CONTAM.fasta.hdr	21638	16834	28339	4	16836	21638	28339	16834	25726	4	16836	0.99	21638	28339	16834	25726	4	https://kronos.stanford.edu/cgi-bin/blast_html4?Db=/seq_db/static/ind_MOUSE.Tryp.TMT.REVUniprot20150423.CONTAM.fasta.hdr&Pep=ELSHSPPRENSFESSLEFK&MassType=0	https://kronos.stanford.edu/gfy/www/modules/show_out/show_out_wrapper.php?run_id=&search_id=&scans_id=&peptide_id=&scanf=&charge=	https://kronos.stanford.edu/gfy/www/modules/show_out/show_out_wrapper.php?run_id=16836&search_id=21638&scans_id=16834&peptide_id=28339&scanf=25726&charge=4	http://kronos.stanford.edu/gfy/www/modules/sdig/index.php?run_id=16836&search_id=21638&scans_id=16834&peptide_id=28339&scanf=25726	http:/kronos.stanford.edu/gfy/www/modules/ascore/visual/trim-phos.php?run_id=16836&search_id=21638&scans_id=16834&peptide_id=28339&charge=4	488418	0.960238	0.107467	0.333446	0.0879499	0.0984487	3.79132
GRB2-associated-binding protein 1 OS=Mus musculus GN=Gab1 PE=1 SV=2	sp|Q9QYY0|GAB1_MOUSE	420	S	SSS|79.97|LEGFHSQYK	1	PSDRSSS*LEGFHS	2	0	2.8315	0.0541	0.4813	53.04	NO OTHERS:2	NONE > ascore = 13	2	0	0	0	SSSLEGFHSQYK	ind_MOUSE.Tryp.TMT.REVUniprot20150423.CONTAM.fasta.hdr	21637	16835	5343	3	16837	21636	2905	16836	11560	3		0.99	21636	2905	16836	12746	3	https://kronos.stanford.edu/cgi-bin/blast_html4?Db=/seq_db/static/ind_MOUSE.Tryp.TMT.REVUniprot20150423.CONTAM.fasta.hdr&Pep=SSSLEGFHSQYK&MassType=0	https://kronos.stanford.edu/gfy/www/modules/show_out/show_out_wrapper.php?run_id=&search_id=&scans_id=&peptide_id=&scanf=&charge=	https://kronos.stanford.edu/gfy/www/modules/show_out/show_out_wrapper.php?run_id=&search_id=21636&scans_id=16836&peptide_id=2905&scanf=11560&charge=3	http://kronos.stanford.edu/gfy/www/modules/sdig/index.php?run_id=&search_id=21636&scans_id=16836&peptide_id=2905&scanf=11560	http:/kronos.stanford.edu/gfy/www/modules/ascore/visual/trim-phos.php?run_id=16837&search_id=21637&scans_id=16835&peptide_id=5343&charge=3	3.02902e+06	0.971763	0.098989	0.342932	0.0906199	0.131429	3.7843
Paired mesoderm homeobox protein 1 OS=Mus musculus GN=Prrx1 PE=1 SV=1	tr|G3UZ44|G3UZ44_MOUSE	21	S	LDS|79.97|PGNLDTLQAK	1	LGGRLDS*PGNLDT	4	52.62	3.122	0.3432	0.4038	67.13	NO OTHERS:4	LDS|79.97|PGNLDTLQAK	4	0	0	2	LDSPGNLDTLQAK	ind_MOUSE.Tryp.TMT.REVUniprot20150423.CONTAM.fasta.hdr	21636	16836	23811	2		21637	27172	16835	25028	3		0.99	21636	23811	16836	26387	2	https://kronos.stanford.edu/cgi-bin/blast_html4?Db=/seq_db/static/ind_MOUSE.Tryp.TMT.REVUniprot20150423.CONTAM.fasta.hdr&Pep=LDSPGNLDTLQAK&MassType=0	https://kronos.stanford.edu/gfy/www/modules/show_out/show_out_wrapper.php?run_id=&search_id=&scans_id=&peptide_id=&scanf=&charge=	https://kronos.stanford.edu/gfy/www/modules/show_out/show_out_wrapper.php?run_id=&search_id=21637&scans_id=16835&peptide_id=27172&scanf=25028&charge=3	http://kronos.stanford.edu/gfy/www/modules/sdig/index.php?run_id=&search_id=21637&scans_id=16835&peptide_id=27172&scanf=25028	http:/kronos.stanford.edu/gfy/www/modules/ascore/visual/trim-phos.php?run_id=&search_id=21636&scans_id=16836&peptide_id=23811&charge=2	4.43748e+06	0.975369	0.153326	0.350437	0.0926294	0.10918	3.78322
tRNA-dihydrouridine(47) synthase [NAD(P)(+)]-like OS=Mus musculus GN=Dus3l PE=2 SV=1	sp|Q91XI1|DUS3L_MOUSE	231	T	LTQSPMPT|79.97|VVPETTVAMATPK	1	TQSPMPT*VVPETT	1	10.53	2.8894	0.0388	0.3517	41.96	NO OTHERS:1	NONE > ascore = 13	1	0	0	1	LTQSPMPTVVPETTVAMATPK	ind_MOUSE.Tryp.TMT.REVUniprot20150423.CONTAM.fasta.hdr	21634	16839	37957	3	16841	21634	37957	16839	30728	3	16841	0.99	21634	37957	16839	30728	3	https://kronos.stanford.edu/cgi-bin/blast_html4?Db=/seq_db/static/ind_MOUSE.Tryp.TMT.REVUniprot20150423.CONTAM.fasta.hdr&Pep=LTQSPMPTVVPETTVAMATPK&MassType=0	https://kronos.stanford.edu/gfy/www/modules/show_out/show_out_wrapper.php?run_id=&search_id=&scans_id=&peptide_id=&scanf=&charge=	https://kronos.stanford.edu/gfy/www/modules/show_out/show_out_wrapper.php?run_id=16841&search_id=21634&scans_id=16839&peptide_id=37957&scanf=30728&charge=3	http://kronos.stanford.edu/gfy/www/modules/sdig/index.php?run_id=16841&search_id=21634&scans_id=16839&peptide_id=37957&scanf=30728	http:/kronos.stanford.edu/gfy/www/modules/ascore/visual/trim-phos.php?run_id=16841&search_id=21634&scans_id=16839&peptide_id=37957&charge=3	285321	0.935653	0.123729	0.393299	0.104084	0.130096	3.77867
Growth arrest-specific protein 7 OS=Mus musculus GN=Gas7 PE=4 SV=1	tr|B1ATI9|B1ATI9_MOUSE	98	S	STGDSQNLGSS|79.97|SPGRK	1	SQNLGSS*SPGRKQ	1	6.9	2.8182	0.0126	0.364	56.73	NO OTHERS:1	NONE > ascore = 13	1	0	0	2	STGDSQNLGSSSPGRK	ind_MOUSE.Tryp.TMT.REVUniprot20150423.CONTAM.fasta.hdr	21637	16835	53682	2	16837	21637	53682	16835	3924	2	16837	0.99	21637	53682	16835	3924	2	https://kronos.stanford.edu/cgi-bin/blast_html4?Db=/seq_db/static/ind_MOUSE.Tryp.TMT.REVUniprot20150423.CONTAM.fasta.hdr&Pep=STGDSQNLGSSSPGRK&MassType=0	https://kronos.stanford.edu/gfy/www/modules/show_out/show_out_wrapper.php?run_id=&search_id=&scans_id=&peptide_id=&scanf=&charge=	https://kronos.stanford.edu/gfy/www/modules/show_out/show_out_wrapper.php?run_id=16837&search_id=21637&scans_id=16835&peptide_id=53682&scanf=3924&charge=2	http://kronos.stanford.edu/gfy/www/modules/sdig/index.php?run_id=16837&search_id=21637&scans_id=16835&peptide_id=53682&scanf=3924	http:/kronos.stanford.edu/gfy/www/modules/ascore/visual/trim-phos.php?run_id=16837&search_id=21637&scans_id=16835&peptide_id=53682&charge=2	391729	0.791807	0.21443	0.287003	0.0760215	0.0730953	3.77528
Ataxin-2 OS=Mus musculus GN=Atxn2 PE=1 SV=1	tr|E9QM77|E9QM77_MOUSE	636	S	TS|79.97|PAGGTWSSVVSGVPR	1	PPVARTS*PAGGTW	1	0	3.3911	0.0131	0.5559	84.97	NO OTHERS:1	NONE > ascore = 13	1	0	0	4	TSPAGGTWSSVVSGVPR	ind_MOUSE.Tryp.TMT.REVUniprot20150423.CONTAM.fasta.hdr	21634	16839	22526	2	16841	21634	22526	16839	22205	2	16841	0.99	21634	22526	16839	22205	2	https://kronos.stanford.edu/cgi-bin/blast_html4?Db=/seq_db/static/ind_MOUSE.Tryp.TMT.REVUniprot20150423.CONTAM.fasta.hdr&Pep=TSPAGGTWSSVVSGVPR&MassType=0	https://kronos.stanford.edu/gfy/www/modules/show_out/show_out_wrapper.php?run_id=&search_id=&scans_id=&peptide_id=&scanf=&charge=	https://kronos.stanford.edu/gfy/www/modules/show_out/show_out_wrapper.php?run_id=16841&search_id=21634&scans_id=16839&peptide_id=22526&scanf=22205&charge=2	http://kronos.stanford.edu/gfy/www/modules/sdig/index.php?run_id=16841&search_id=21634&scans_id=16839&peptide_id=22526&scanf=22205	http:/kronos.stanford.edu/gfy/www/modules/ascore/visual/trim-phos.php?run_id=16841&search_id=21634&scans_id=16839&peptide_id=22526&charge=2	909916	0.945048	0.128734	0.303515	0.0804584	0.122547	3.77232
Protein PRRC2A OS=Mus musculus GN=Prrc2a PE=1 SV=1	sp|Q7TSC1|PRC2A_MOUSE	2114	S	IDLYQQAS|79.97|PPDALR	1	DLYQQAS*PPDALR	1	18.8	2.4297	0.3021	0.3386	48.75	NO OTHERS:1	IDLYQQAS|79.97|PPDALR	1	0	0	0	IDLYQQASPPDALR	ind_MOUSE.Tryp.TMT.REVUniprot20150423.CONTAM.fasta.hdr	21637	16835	31614	3	16837	21637	31614	16835	27377	3	16837	0.99	21637	31614	16835	27377	3	https://kronos.stanford.edu/cgi-bin/blast_html4?Db=/seq_db/static/ind_MOUSE.Tryp.TMT.REVUniprot20150423.CONTAM.fasta.hdr&Pep=IDLYQQASPPDALR&MassType=0	https://kronos.stanford.edu/gfy/www/modules/show_out/show_out_wrapper.php?run_id=&search_id=&scans_id=&peptide_id=&scanf=&charge=	https://kronos.stanford.edu/gfy/www/modules/show_out/show_out_wrapper.php?run_id=16837&search_id=21637&scans_id=16835&peptide_id=31614&scanf=27377&charge=3	http://kronos.stanford.edu/gfy/www/modules/sdig/index.php?run_id=16837&search_id=21637&scans_id=16835&peptide_id=31614&scanf=27377	http:/kronos.stanford.edu/gfy/www/modules/ascore/visual/trim-phos.php?run_id=16837&search_id=21637&scans_id=16835&peptide_id=31614&charge=3	83920.2	0.916931	0.0859059	0.320702	0.0850264	0.149477	3.7718
Mitochondrial import receptor subunit TOM20 homolog OS=Mus musculus GN=Tomm20 PE=1 SV=1	sp|Q9DCC8|TOM20_MOUSE	138	S	IVSAQS|79.97|LAEDDVE	1	RIVSAQS*LAEDDV	1	35.82	1.5914	0.45	0.45	23.11	NO OTHERS:1	IVSAQS|79.97|LAEDDVE	1	0	0	0	IVSAQSLAEDDVE	ind_MOUSE.Tryp.TMT.REVUniprot20150423.CONTAM.fasta.hdr	21639	16833	41152	2	16835	21639	41152	16833	31684	2	16835	0.99	21639	41152	16833	31684	2	https://kronos.stanford.edu/cgi-bin/blast_html4?Db=/seq_db/static/ind_MOUSE.Tryp.TMT.REVUniprot20150423.CONTAM.fasta.hdr&Pep=IVSAQSLAEDDVE&MassType=0	https://kronos.stanford.edu/gfy/www/modules/show_out/show_out_wrapper.php?run_id=&search_id=&scans_id=&peptide_id=&scanf=&charge=	https://kronos.stanford.edu/gfy/www/modules/show_out/show_out_wrapper.php?run_id=16835&search_id=21639&scans_id=16833&peptide_id=41152&scanf=31684&charge=2	http://kronos.stanford.edu/gfy/www/modules/sdig/index.php?run_id=16835&search_id=21639&scans_id=16833&peptide_id=41152&scanf=31684	http:/kronos.stanford.edu/gfy/www/modules/ascore/visual/trim-phos.php?run_id=16835&search_id=21639&scans_id=16833&peptide_id=41152&charge=2	239530	0.932491	0.148133	0.391798	0.104256	0.11994	3.75805
UDP-N-acetylhexosamine pyrophosphorylase-like protein 1 OS=Mus musculus GN=Uap1l1 PE=2 SV=1	sp|Q3TW96|UAP1L_MOUSE	490	S	QLQS|79.97|PFILDEDQAR	1	QGRQLQS*PFILDE	1	1000	2.2016	0.4156	0.4156	43.32	NO OTHERS:1	QLQS|79.97|PFILDEDQAR	1	0	0	1	QLQSPFILDEDQAR	ind_MOUSE.Tryp.TMT.REVUniprot20150423.CONTAM.fasta.hdr	21638	16834	33524	2	16836	21638	33524	16834	28490	2	16836	0.99	21638	33524	16834	28490	2	https://kronos.stanford.edu/cgi-bin/blast_html4?Db=/seq_db/static/ind_MOUSE.Tryp.TMT.REVUniprot20150423.CONTAM.fasta.hdr&Pep=QLQSPFILDEDQAR&MassType=0	https://kronos.stanford.edu/gfy/www/modules/show_out/show_out_wrapper.php?run_id=&search_id=&scans_id=&peptide_id=&scanf=&charge=	https://kronos.stanford.edu/gfy/www/modules/show_out/show_out_wrapper.php?run_id=16836&search_id=21638&scans_id=16834&peptide_id=33524&scanf=28490&charge=2	http://kronos.stanford.edu/gfy/www/modules/sdig/index.php?run_id=16836&search_id=21638&scans_id=16834&peptide_id=33524&scanf=28490	http:/kronos.stanford.edu/gfy/www/modules/ascore/visual/trim-phos.php?run_id=16836&search_id=21638&scans_id=16834&peptide_id=33524&charge=2	1.21651e+06	0.872499	0.0443621	0.356044	0.0948902	0.088049	3.75216
Drebrin-like protein OS=Mus musculus GN=Dbnl PE=1 SV=2	sp|Q62418|DBNL_MOUSE	279	T	AMSTT|79.97|SVTSSQPGK	1	ERAMSTT*SVTSSQ	2	0	1.961	0.0133	0.4392	42.36	NO OTHERS:2	NONE > ascore = 13	2	0	0	2	AMSTTSVTSSQPGK	ind_MOUSE.Tryp.TMT.REVUniprot20150423.CONTAM.fasta.hdr	21637	16835	5259	2	16837	21637	5259	16835	12701	2	16837	0.99	21637	5259	16835	12701	2	https://kronos.stanford.edu/cgi-bin/blast_html4?Db=/seq_db/static/ind_MOUSE.Tryp.TMT.REVUniprot20150423.CONTAM.fasta.hdr&Pep=AMSTTSVTSSQPGK&MassType=0	https://kronos.stanford.edu/gfy/www/modules/show_out/show_out_wrapper.php?run_id=&search_id=&scans_id=&peptide_id=&scanf=&charge=	https://kronos.stanford.edu/gfy/www/modules/show_out/show_out_wrapper.php?run_id=16837&search_id=21637&scans_id=16835&peptide_id=5259&scanf=12701&charge=2	http://kronos.stanford.edu/gfy/www/modules/sdig/index.php?run_id=16837&search_id=21637&scans_id=16835&peptide_id=5259&scanf=12701	http:/kronos.stanford.edu/gfy/www/modules/ascore/visual/trim-phos.php?run_id=16837&search_id=21637&scans_id=16835&peptide_id=5259&charge=2	3.00025e+06	0.993588	0.124354	0.366143	0.0976711	0.111486	3.74874
Interferon regulatory factor 2-binding protein 1 OS=Mus musculus GN=Irf2bp1 PE=1 SV=2	sp|Q8R3Y8|I2BP1_MOUSE	371	S	APS|79.97|RNLAPTPR	1	PPPRAPS*RNLAPT	1	44.39	2.1823	0.3044	0.3044	44.68	NO OTHERS:1	APS|79.97|RNLAPTPR	1	0	0	1	APSRNLAPTPR	ind_MOUSE.Tryp.TMT.REVUniprot20150423.CONTAM.fasta.hdr	21636	16836	72090	3	16838	21636	72090	16836	4977	3	16838	0.99	21636	72090	16836	4977	3	https://kronos.stanford.edu/cgi-bin/blast_html4?Db=/seq_db/static/ind_MOUSE.Tryp.TMT.REVUniprot20150423.CONTAM.fasta.hdr&Pep=APSRNLAPTPR&MassType=0	https://kronos.stanford.edu/gfy/www/modules/show_out/show_out_wrapper.php?run_id=&search_id=&scans_id=&peptide_id=&scanf=&charge=	https://kronos.stanford.edu/gfy/www/modules/show_out/show_out_wrapper.php?run_id=16838&search_id=21636&scans_id=16836&peptide_id=72090&scanf=4977&charge=3	http://kronos.stanford.edu/gfy/www/modules/sdig/index.php?run_id=16838&search_id=21636&scans_id=16836&peptide_id=72090&scanf=4977	http:/kronos.stanford.edu/gfy/www/modules/ascore/visual/trim-phos.php?run_id=16838&search_id=21636&scans_id=16836&peptide_id=72090&charge=3	3.5192e+06	0.983403	0.124944	0.357705	0.0955101	0.0973714	3.7452
Protein Sec16a OS=Mus musculus GN=Sec16a PE=1 SV=1	tr|A2AIX1|A2AIX1_MOUSE	2106	S	APSLTSDS|79.97|EGKKPAQAVK	1	PSLTSDS*EGKKPA	1	10.33	2.4965	0.0216	0.4447	39.69	NO OTHERS:1	NONE > ascore = 13	1	0	0	2	APSLTSDSEGKKPAQAVK	ind_MOUSE.Tryp.TMT.REVUniprot20150423.CONTAM.fasta.hdr	21634	16839	382	2	16841	21634	382	16839	10158	2	16841	0.99	21634	382	16839	10158	2	https://kronos.stanford.edu/cgi-bin/blast_html4?Db=/seq_db/static/ind_MOUSE.Tryp.TMT.REVUniprot20150423.CONTAM.fasta.hdr&Pep=APSLTSDSEGKKPAQAVK&MassType=0	https://kronos.stanford.edu/gfy/www/modules/show_out/show_out_wrapper.php?run_id=&search_id=&scans_id=&peptide_id=&scanf=&charge=	https://kronos.stanford.edu/gfy/www/modules/show_out/show_out_wrapper.php?run_id=16841&search_id=21634&scans_id=16839&peptide_id=382&scanf=10158&charge=2	http://kronos.stanford.edu/gfy/www/modules/sdig/index.php?run_id=16841&search_id=21634&scans_id=16839&peptide_id=382&scanf=10158	http:/kronos.stanford.edu/gfy/www/modules/ascore/visual/trim-phos.php?run_id=16841&search_id=21634&scans_id=16839&peptide_id=382&charge=2	447414	0.980021	0.0862417	0.42398	0.113379	0.12324	3.73948
YTH domain-containing family protein 2 OS=Mus musculus GN=Ythdf2 PE=2 SV=1	sp|Q91YT7|YTHD2_MOUSE	263	S	NGIAGSS|79.97|LPPPPIK	1	NGIAGSS*LPPPPI	1	11.51	1.967	0.0511	0.4745	61.59	NO OTHERS:1	NONE > ascore = 13	1	0	0	0	NGIAGSSLPPPPIK	ind_MOUSE.Tryp.TMT.REVUniprot20150423.CONTAM.fasta.hdr	21636	16836	26227	2	16838	21636	26227	16836	24810	2	16838	0.99	21636	26227	16836	24810	2	https://kronos.stanford.edu/cgi-bin/blast_html4?Db=/seq_db/static/ind_MOUSE.Tryp.TMT.REVUniprot20150423.CONTAM.fasta.hdr&Pep=NGIAGSSLPPPPIK&MassType=0	https://kronos.stanford.edu/gfy/www/modules/show_out/show_out_wrapper.php?run_id=&search_id=&scans_id=&peptide_id=&scanf=&charge=	https://kronos.stanford.edu/gfy/www/modules/show_out/show_out_wrapper.php?run_id=16838&search_id=21636&scans_id=16836&peptide_id=26227&scanf=24810&charge=2	http://kronos.stanford.edu/gfy/www/modules/sdig/index.php?run_id=16838&search_id=21636&scans_id=16836&peptide_id=26227&scanf=24810	http:/kronos.stanford.edu/gfy/www/modules/ascore/visual/trim-phos.php?run_id=16838&search_id=21636&scans_id=16836&peptide_id=26227&charge=2	618411	0.966588	0.102817	0.395616	0.105924	0.133993	3.73491
Eukaryotic translation initiation factor 3 subunit B OS=Mus musculus GN=Eif3b PE=1 SV=1	sp|Q8JZQ9|EIF3B_MOUSE	88	S	S|79.97|PSQEPSAPGK	1	PQSAERS*PSQEPS	4	38.42	1.9692	0.2058	0.3907	85.9	NO OTHERS:4	S|79.97|PSQEPSAPGK	4	0	0	0	SPSQEPSAPGK	ind_MOUSE.Tryp.TMT.REVUniprot20150423.CONTAM.fasta.hdr	21639	16833	88194	2		21639	88194	16833	9330	2		0.99	21639	88194	16833	10577	2	https://kronos.stanford.edu/cgi-bin/blast_html4?Db=/seq_db/static/ind_MOUSE.Tryp.TMT.REVUniprot20150423.CONTAM.fasta.hdr&Pep=SPSQEPSAPGK&MassType=0	https://kronos.stanford.edu/gfy/www/modules/show_out/show_out_wrapper.php?run_id=&search_id=&scans_id=&peptide_id=&scanf=&charge=	https://kronos.stanford.edu/gfy/www/modules/show_out/show_out_wrapper.php?run_id=&search_id=21639&scans_id=16833&peptide_id=88194&scanf=9330&charge=2	http://kronos.stanford.edu/gfy/www/modules/sdig/index.php?run_id=&search_id=21639&scans_id=16833&peptide_id=88194&scanf=9330	http:/kronos.stanford.edu/gfy/www/modules/ascore/visual/trim-phos.php?run_id=&search_id=21639&scans_id=16833&peptide_id=88194&charge=2	1.67238e+07	0.435578	0.0358514	0.25218	0.0676744	0.347289	3.72638
Rab11 family-interacting protein 5 OS=Mus musculus GN=Rab11fip5 PE=1 SV=2	sp|Q8R361|RFIP5_MOUSE	640	S	IMETSPTLLQIS|79.97|PGPPK	1	PTLLQIS*PGPPK+	6	42.07	3.9034	0.3283	0.5931	87.37	NO OTHERS:6	IMETSPTLLQIS|79.97|PGPPK	6	0	0	0	IMETSPTLLQISPGPPK	ind_MOUSE.Tryp.TMT.REVUniprot20150423.CONTAM.fasta.hdr	21634	16839	43510	2		21634	43510	16839	33812	2		0.99	21636	35306	16836	29144	3	https://kronos.stanford.edu/cgi-bin/blast_html4?Db=/seq_db/static/ind_MOUSE.Tryp.TMT.REVUniprot20150423.CONTAM.fasta.hdr&Pep=IMETSPTLLQISPGPPK&MassType=0	https://kronos.stanford.edu/gfy/www/modules/show_out/show_out_wrapper.php?run_id=&search_id=&scans_id=&peptide_id=&scanf=&charge=	https://kronos.stanford.edu/gfy/www/modules/show_out/show_out_wrapper.php?run_id=&search_id=21634&scans_id=16839&peptide_id=43510&scanf=33812&charge=2	http://kronos.stanford.edu/gfy/www/modules/sdig/index.php?run_id=&search_id=21634&scans_id=16839&peptide_id=43510&scanf=33812	http:/kronos.stanford.edu/gfy/www/modules/ascore/visual/trim-phos.php?run_id=&search_id=21634&scans_id=16839&peptide_id=43510&charge=2	2.5083e+06	0.907867	0.0956954	0.320587	0.0861484	0.111375	3.72134
Protein Skiv2l OS=Mus musculus GN=Skiv2l PE=1 SV=1	tr|Q6NZR5|Q6NZR5_MOUSE	212	S	DHPAPVPGLLSLS|79.97|R	1	PGLLSLS*RLLEPL	2	4.54	2.8237	0.0342	0.342	40.86	NO OTHERS:2	NONE > ascore = 13	2	0	0	0	DHPAPVPGLLSLSR	ind_MOUSE.Tryp.TMT.REVUniprot20150423.CONTAM.fasta.hdr	21637	16835	24803	3	16837	21636	20579	16836	21700	3		0.99	21636	20579	16836	23752	3	https://kronos.stanford.edu/cgi-bin/blast_html4?Db=/seq_db/static/ind_MOUSE.Tryp.TMT.REVUniprot20150423.CONTAM.fasta.hdr&Pep=DHPAPVPGLLSLSR&MassType=0	https://kronos.stanford.edu/gfy/www/modules/show_out/show_out_wrapper.php?run_id=&search_id=&scans_id=&peptide_id=&scanf=&charge=	https://kronos.stanford.edu/gfy/www/modules/show_out/show_out_wrapper.php?run_id=&search_id=21636&scans_id=16836&peptide_id=20579&scanf=21700&charge=3	http://kronos.stanford.edu/gfy/www/modules/sdig/index.php?run_id=&search_id=21636&scans_id=16836&peptide_id=20579&scanf=21700	http:/kronos.stanford.edu/gfy/www/modules/ascore/visual/trim-phos.php?run_id=16837&search_id=21637&scans_id=16835&peptide_id=24803&charge=3	168842	0.967077	0.10784	0.412511	0.110898	0.101616	3.71974
Cdc42 effector protein 3 OS=Mus musculus GN=Cdc42ep3 PE=1 SV=1	sp|Q9CQC5|BORG2_MOUSE	27	S	DILS|79.97|PDMISPPLGDFR	1	KLRDILS*PDMISP	1	37.11	2.4932	0.2513	0.4649	32.72	NO OTHERS:1	DILS|79.97|PDMISPPLGDFR	1	0	0	0	DILSPDMISPPLGDFR	ind_MOUSE.Tryp.TMT.REVUniprot20150423.CONTAM.fasta.hdr	21637	16835	61765	2	16837	21637	61765	16835	43629	2	16837	0.99	21637	61765	16835	43629	2	https://kronos.stanford.edu/cgi-bin/blast_html4?Db=/seq_db/static/ind_MOUSE.Tryp.TMT.REVUniprot20150423.CONTAM.fasta.hdr&Pep=DILSPDMISPPLGDFR&MassType=0	https://kronos.stanford.edu/gfy/www/modules/show_out/show_out_wrapper.php?run_id=&search_id=&scans_id=&peptide_id=&scanf=&charge=	https://kronos.stanford.edu/gfy/www/modules/show_out/show_out_wrapper.php?run_id=16837&search_id=21637&scans_id=16835&peptide_id=61765&scanf=43629&charge=2	http://kronos.stanford.edu/gfy/www/modules/sdig/index.php?run_id=16837&search_id=21637&scans_id=16835&peptide_id=61765&scanf=43629	http:/kronos.stanford.edu/gfy/www/modules/ascore/visual/trim-phos.php?run_id=16837&search_id=21637&scans_id=16835&peptide_id=61765&charge=2	122046	0.98112	0.0755998	0.406335	0.109369	0.132448	3.71525
RelA-associated inhibitor OS=Mus musculus GN=Ppp1r13l PE=1 SV=1	sp|Q5I1X5|IASPP_MOUSE	394	S	AVLPGS|79.97|PIFSR	1	RAVLPGS*PIFSRA	1	22.87	1.589	0.0868	0.2593	22.75	NO OTHERS:1	AVLPGS|79.97|PIFSR	1	0	0	0	AVLPGSPIFSR	ind_MOUSE.Tryp.TMT.REVUniprot20150423.CONTAM.fasta.hdr	21634	16839	26944	2	16841	21634	26944	16839	24590	2	16841	0.99	21634	26944	16839	24590	2	https://kronos.stanford.edu/cgi-bin/blast_html4?Db=/seq_db/static/ind_MOUSE.Tryp.TMT.REVUniprot20150423.CONTAM.fasta.hdr&Pep=AVLPGSPIFSR&MassType=0	https://kronos.stanford.edu/gfy/www/modules/show_out/show_out_wrapper.php?run_id=&search_id=&scans_id=&peptide_id=&scanf=&charge=	https://kronos.stanford.edu/gfy/www/modules/show_out/show_out_wrapper.php?run_id=16841&search_id=21634&scans_id=16839&peptide_id=26944&scanf=24590&charge=2	http://kronos.stanford.edu/gfy/www/modules/sdig/index.php?run_id=16841&search_id=21634&scans_id=16839&peptide_id=26944&scanf=24590	http:/kronos.stanford.edu/gfy/www/modules/ascore/visual/trim-phos.php?run_id=16841&search_id=21634&scans_id=16839&peptide_id=26944&charge=2	580255	0.524617	0.0940188	0.228106	0.0619946	0.0681191	3.67946
Protein Ahnak OS=Mus musculus GN=Ahnak PE=1 SV=1	tr|E9Q616|E9Q616_MOUSE	232	S	AGAIS|79.97|ASGPELEGAGHSK	1	IRAGAIS*ASGPEL	1	0	1.9943	0.0349	0.4495	50.79	NO OTHERS:1	NONE > ascore = 13	1	0	0	0	AGAISASGPELEGAGHSK	ind_MOUSE.Tryp.TMT.REVUniprot20150423.CONTAM.fasta.hdr	21636	16836	2748	2	16838	21636	2748	16836	11477	2	16838	0.99	21636	2748	16836	11477	2	https://kronos.stanford.edu/cgi-bin/blast_html4?Db=/seq_db/static/ind_MOUSE.Tryp.TMT.REVUniprot20150423.CONTAM.fasta.hdr&Pep=AGAISASGPELEGAGHSK&MassType=0	https://kronos.stanford.edu/gfy/www/modules/show_out/show_out_wrapper.php?run_id=&search_id=&scans_id=&peptide_id=&scanf=&charge=	https://kronos.stanford.edu/gfy/www/modules/show_out/show_out_wrapper.php?run_id=16838&search_id=21636&scans_id=16836&peptide_id=2748&scanf=11477&charge=2	http://kronos.stanford.edu/gfy/www/modules/sdig/index.php?run_id=16838&search_id=21636&scans_id=16836&peptide_id=2748&scanf=11477	http:/kronos.stanford.edu/gfy/www/modules/ascore/visual/trim-phos.php?run_id=16838&search_id=21636&scans_id=16836&peptide_id=2748&charge=2	259630	0.968833	0.113311	0.425503	0.116381	0.108436	3.65612
PDZ domain-containing protein GIPC1 OS=Mus musculus GN=Gipc1 PE=1 SV=1	sp|Q9Z0G0|GIPC1_MOUSE	252	T	SRGPAT|79.97|VEDLPSAFEEK	1	RSRGPAT*VEDLPS	2	7.55	2.4841	0.0983	0.3674	65.44	NO OTHERS:2	NONE > ascore = 13	2	0	0	0	SRGPATVEDLPSAFEEK	ind_MOUSE.Tryp.TMT.REVUniprot20150423.CONTAM.fasta.hdr	21637	16835	26211	3		21638	28808	16834	25969	3	16836	0.99	21637	26211	16835	25969	3	https://kronos.stanford.edu/cgi-bin/blast_html4?Db=/seq_db/static/ind_MOUSE.Tryp.TMT.REVUniprot20150423.CONTAM.fasta.hdr&Pep=SRGPATVEDLPSAFEEK&MassType=0	https://kronos.stanford.edu/gfy/www/modules/show_out/show_out_wrapper.php?run_id=&search_id=&scans_id=&peptide_id=&scanf=&charge=	https://kronos.stanford.edu/gfy/www/modules/show_out/show_out_wrapper.php?run_id=16836&search_id=21638&scans_id=16834&peptide_id=28808&scanf=25969&charge=3	http://kronos.stanford.edu/gfy/www/modules/sdig/index.php?run_id=16836&search_id=21638&scans_id=16834&peptide_id=28808&scanf=25969	http:/kronos.stanford.edu/gfy/www/modules/ascore/visual/trim-phos.php?run_id=&search_id=21637&scans_id=16835&peptide_id=26211&charge=3	925737	0.939215	0.0870137	0.32843	0.0900556	0.14202	3.64697
Pleckstrin homology domain-containing family O member 2 OS=Mus musculus GN=Plekho2 PE=1 SV=1	sp|Q8K124|PKHO2_MOUSE	211	S	ALMPPVKPS|79.97|PGPETSAVEDSK	1	MPPVKPS*PGPETS	3	45.83	3.6079	0.0567	0.4164	92.4	NO OTHERS:3	ALMPPVKPS|79.97|PGPETSAVEDSK	3	0	0	0	ALMPPVKPSPGPETSAVEDSKETPAGER	ind_MOUSE.Tryp.TMT.REVUniprot20150423.CONTAM.fasta.hdr	21634	16839	19290	3	16841	21634	19290	16839	20533	3	16841	0.99	21634	19290	16839	20533	3	https://kronos.stanford.edu/cgi-bin/blast_html4?Db=/seq_db/static/ind_MOUSE.Tryp.TMT.REVUniprot20150423.CONTAM.fasta.hdr&Pep=ALMPPVKPSPGPETSAVEDSKETPAGER&MassType=0	https://kronos.stanford.edu/gfy/www/modules/show_out/show_out_wrapper.php?run_id=&search_id=&scans_id=&peptide_id=&scanf=&charge=	https://kronos.stanford.edu/gfy/www/modules/show_out/show_out_wrapper.php?run_id=16841&search_id=21634&scans_id=16839&peptide_id=19290&scanf=20533&charge=3	http://kronos.stanford.edu/gfy/www/modules/sdig/index.php?run_id=16841&search_id=21634&scans_id=16839&peptide_id=19290&scanf=20533	http:/kronos.stanford.edu/gfy/www/modules/ascore/visual/trim-phos.php?run_id=16841&search_id=21634&scans_id=16839&peptide_id=19290&charge=3	3.25946e+06	0.964457	0.0537615	0.402341	0.110672	0.0832995	3.63545
Transcription factor E2F4 OS=Mus musculus GN=E2f4 PE=2 SV=1	sp|Q8R0K9|E2F4_MOUSE	161	S	APS|79.97|GTSLEVPIPEGLNGQK	1	LAIRAPS*GTSLEV	1	0	3.5401	0.0076	0.4689	56.65	NO OTHERS:1	NONE > ascore = 13	1	0	0	0	APSGTSLEVPIPEGLNGQK	ind_MOUSE.Tryp.TMT.REVUniprot20150423.CONTAM.fasta.hdr	21636	16836	36545	3	16838	21636	36545	16836	30563	3	16838	0.99	21636	36545	16836	30563	3	https://kronos.stanford.edu/cgi-bin/blast_html4?Db=/seq_db/static/ind_MOUSE.Tryp.TMT.REVUniprot20150423.CONTAM.fasta.hdr&Pep=APSGTSLEVPIPEGLNGQK&MassType=0	https://kronos.stanford.edu/gfy/www/modules/show_out/show_out_wrapper.php?run_id=&search_id=&scans_id=&peptide_id=&scanf=&charge=	https://kronos.stanford.edu/gfy/www/modules/show_out/show_out_wrapper.php?run_id=16838&search_id=21636&scans_id=16836&peptide_id=36545&scanf=30563&charge=3	http://kronos.stanford.edu/gfy/www/modules/sdig/index.php?run_id=16838&search_id=21636&scans_id=16836&peptide_id=36545&scanf=30563	http:/kronos.stanford.edu/gfy/www/modules/ascore/visual/trim-phos.php?run_id=16838&search_id=21636&scans_id=16836&peptide_id=36545&charge=3	161512	0.960791	0.0854192	0.338259	0.093336	0.135699	3.6241
Serine/threonine-protein kinase PAK 4 OS=Mus musculus GN=Samd4b PE=4 SV=1	tr|G5E8A7|G5E8A7_MOUSE	599	T	HALT|79.97|SPSLGGQGR	1	SPRHALT*SPSLGG	1	13.27	2.4536	0.0314	0.3158	45.45	NO OTHERS:1	HALT|79.97|SPSLGGQGR	1	0	0	1	HALTSPSLGGQGR	ind_MOUSE.Tryp.TMT.REVUniprot20150423.CONTAM.fasta.hdr	21637	16835	79791	3	16837	21637	79791	16835	7464	3	16837	0.99	21637	79791	16835	7464	3	https://kronos.stanford.edu/cgi-bin/blast_html4?Db=/seq_db/static/ind_MOUSE.Tryp.TMT.REVUniprot20150423.CONTAM.fasta.hdr&Pep=HALTSPSLGGQGR&MassType=0	https://kronos.stanford.edu/gfy/www/modules/show_out/show_out_wrapper.php?run_id=&search_id=&scans_id=&peptide_id=&scanf=&charge=	https://kronos.stanford.edu/gfy/www/modules/show_out/show_out_wrapper.php?run_id=16837&search_id=21637&scans_id=16835&peptide_id=79791&scanf=7464&charge=3	http://kronos.stanford.edu/gfy/www/modules/sdig/index.php?run_id=16837&search_id=21637&scans_id=16835&peptide_id=79791&scanf=7464	http:/kronos.stanford.edu/gfy/www/modules/ascore/visual/trim-phos.php?run_id=16837&search_id=21637&scans_id=16835&peptide_id=79791&charge=3	1.40849e+06	0.979876	0.101909	0.35185	0.0972278	0.113751	3.61882
SH3 domain-containing kinase-binding protein 1 (Fragment) OS=Mus musculus GN=Sh3kbp1 PE=1 SV=1	tr|B1AZ85|B1AZ85_MOUSE	195	T	KLPPATST|79.97|PDPSKTEMDSR	1	LPPATST*PDPSKT	1	5.88	2.8407	0.0041	0.3589	26.66	NO OTHERS:1	NONE > ascore = 13	1	0	0	7	KLPPATSTPDPSKTEMDSR	ind_MOUSE.Tryp.TMT.REVUniprot20150423.CONTAM.fasta.hdr	21634	16839	77998	3	16841	21634	77998	16839	9433	3	16841	0.99	21634	77998	16839	9433	3	https://kronos.stanford.edu/cgi-bin/blast_html4?Db=/seq_db/static/ind_MOUSE.Tryp.TMT.REVUniprot20150423.CONTAM.fasta.hdr&Pep=KLPPATSTPDPSKTEMDSR&MassType=0	https://kronos.stanford.edu/gfy/www/modules/show_out/show_out_wrapper.php?run_id=&search_id=&scans_id=&peptide_id=&scanf=&charge=	https://kronos.stanford.edu/gfy/www/modules/show_out/show_out_wrapper.php?run_id=16841&search_id=21634&scans_id=16839&peptide_id=77998&scanf=9433&charge=3	http://kronos.stanford.edu/gfy/www/modules/sdig/index.php?run_id=16841&search_id=21634&scans_id=16839&peptide_id=77998&scanf=9433	http:/kronos.stanford.edu/gfy/www/modules/ascore/visual/trim-phos.php?run_id=16841&search_id=21634&scans_id=16839&peptide_id=77998&charge=3	253412	0.951546	0.156204	0.355245	0.0986851	0.108476	3.59978
Growth factor receptor-bound protein 10 OS=Mus musculus GN=Grb10 PE=1 SV=1	tr|Q5SUW3|Q5SUW3_MOUSE	429	S	MNILS|79.97|SQS|79.97|PLHPSTLNAVIHR	1	TRMNILS*SQSPLH	3	6.62	3.6807	0.0588	0.3988	65.7	430:1; 432:2	NONE > ascore = 13	0	3	0	3	MNILSSQSPLHPSTLNAVIHR	ind_MOUSE.Tryp.TMT.REVUniprot20150423.CONTAM.fasta.hdr	21636	16836	32988	4		21636	32988	16836	28538	4		0.99	21636	25151	16836	24231	3	https://kronos.stanford.edu/cgi-bin/blast_html4?Db=/seq_db/static/ind_MOUSE.Tryp.TMT.REVUniprot20150423.CONTAM.fasta.hdr&Pep=MNILSSQSPLHPSTLNAVIHR&MassType=0	https://kronos.stanford.edu/gfy/www/modules/show_out/show_out_wrapper.php?run_id=&search_id=&scans_id=&peptide_id=&scanf=&charge=	https://kronos.stanford.edu/gfy/www/modules/show_out/show_out_wrapper.php?run_id=&search_id=21636&scans_id=16836&peptide_id=32988&scanf=28538&charge=4	http://kronos.stanford.edu/gfy/www/modules/sdig/index.php?run_id=&search_id=21636&scans_id=16836&peptide_id=32988&scanf=28538	http:/kronos.stanford.edu/gfy/www/modules/ascore/visual/trim-phos.php?run_id=&search_id=21636&scans_id=16836&peptide_id=32988&charge=4	733547	0.876619	0.0628662	0.31718	0.0886331	0.188102	3.57857
Nuclear factor of activated T-cells, cytoplasmic 4 OS=Mus musculus GN=Nfatc4 PE=1 SV=2	sp|Q8K120|NFAC4_MOUSE	311	S	DPSS|79.97|PGPFDYVGAPPTESIPQK	1	LVRDPSS*PGPFDY	1	0	2.5961	0.0446	0.4745	27.65	NO OTHERS:1	NONE > ascore = 13	1	0	0	1	DPSSPGPFDYVGAPPTESIPQK	ind_MOUSE.Tryp.TMT.REVUniprot20150423.CONTAM.fasta.hdr	21637	16835	37959	2	16837	21637	37959	16835	30799	2	16837	0.99	21637	37959	16835	30799	2	https://kronos.stanford.edu/cgi-bin/blast_html4?Db=/seq_db/static/ind_MOUSE.Tryp.TMT.REVUniprot20150423.CONTAM.fasta.hdr&Pep=DPSSPGPFDYVGAPPTESIPQK&MassType=0	https://kronos.stanford.edu/gfy/www/modules/show_out/show_out_wrapper.php?run_id=&search_id=&scans_id=&peptide_id=&scanf=&charge=	https://kronos.stanford.edu/gfy/www/modules/show_out/show_out_wrapper.php?run_id=16837&search_id=21637&scans_id=16835&peptide_id=37959&scanf=30799&charge=2	http://kronos.stanford.edu/gfy/www/modules/sdig/index.php?run_id=16837&search_id=21637&scans_id=16835&peptide_id=37959&scanf=30799	http:/kronos.stanford.edu/gfy/www/modules/ascore/visual/trim-phos.php?run_id=16837&search_id=21637&scans_id=16835&peptide_id=37959&charge=2	328348	0.949095	0.136463	0.301904	0.0844323	0.12034	3.5757
Ankyrin repeat and LEM domain-containing protein 2 OS=Mus musculus GN=Ankle2 PE=2 SV=2	sp|Q6P1H6|ANKL2_MOUSE	789	S	GAADSDLLAS|79.97|PPAIASLGK	1	DSDLLAS*PPAIAS	5	57.41	3.4614	0.2612	0.2612	87.96	NO OTHERS:5	GAADSDLLAS|79.97|PPAIASLGK, KGAADSDLLAS|79.97|PPAIASLGK	5	0	0	2	GAADSDLLASPPAIASLGK	ind_MOUSE.Tryp.TMT.REVUniprot20150423.CONTAM.fasta.hdr	21636	16836	40044	2		21634	37472	16839	30471	3	16841	0.99	21636	40044	16836	34267	2	https://kronos.stanford.edu/cgi-bin/blast_html4?Db=/seq_db/static/ind_MOUSE.Tryp.TMT.REVUniprot20150423.CONTAM.fasta.hdr&Pep=GAADSDLLASPPAIASLGK&MassType=0	https://kronos.stanford.edu/gfy/www/modules/show_out/show_out_wrapper.php?run_id=&search_id=&scans_id=&peptide_id=&scanf=&charge=	https://kronos.stanford.edu/gfy/www/modules/show_out/show_out_wrapper.php?run_id=16841&search_id=21634&scans_id=16839&peptide_id=37472&scanf=30471&charge=3	http://kronos.stanford.edu/gfy/www/modules/sdig/index.php?run_id=16841&search_id=21634&scans_id=16839&peptide_id=37472&scanf=30471	http:/kronos.stanford.edu/gfy/www/modules/ascore/visual/trim-phos.php?run_id=&search_id=21636&scans_id=16836&peptide_id=40044&charge=2	1.66062e+06	0.982828	0.0775363	0.383792	0.107728	0.139937	3.56259
TNFAIP3-interacting protein 1 OS=Mus musculus GN=Tnip1 PE=4 SV=1	tr|D3Z2W0|D3Z2W0_MOUSE	76	T	AEELVKDSELSPPT|79.97|SAPSLVSFDDLAELTGQDTK	1	SELSPPT*SAPSLV	1	0	3.9708	0.0188	0.4925	65.12	NO OTHERS:1	NONE > ascore = 13	1	0	0	6	AEELVKDSELSPPTSAPSLVSFDDLAELTGQDTK	ind_MOUSE.Tryp.TMT.REVUniprot20150423.CONTAM.fasta.hdr	21636	16836	58357	3	16838	21636	58357	16836	42357	3	16838	0.99	21636	58357	16836	42357	3	https://kronos.stanford.edu/cgi-bin/blast_html4?Db=/seq_db/static/ind_MOUSE.Tryp.TMT.REVUniprot20150423.CONTAM.fasta.hdr&Pep=AEELVKDSELSPPTSAPSLVSFDDLAELTGQDTK&MassType=0	https://kronos.stanford.edu/gfy/www/modules/show_out/show_out_wrapper.php?run_id=&search_id=&scans_id=&peptide_id=&scanf=&charge=	https://kronos.stanford.edu/gfy/www/modules/show_out/show_out_wrapper.php?run_id=16838&search_id=21636&scans_id=16836&peptide_id=58357&scanf=42357&charge=3	http://kronos.stanford.edu/gfy/www/modules/sdig/index.php?run_id=16838&search_id=21636&scans_id=16836&peptide_id=58357&scanf=42357	http:/kronos.stanford.edu/gfy/www/modules/ascore/visual/trim-phos.php?run_id=16838&search_id=21636&scans_id=16836&peptide_id=58357&charge=3	137177	0.799499	0.075716	0.290212	0.0822828	0.138775	3.527
Sorting nexin 18 OS=Mus musculus GN=Snx18 PE=2 SV=1	tr|Q8C788|Q8C788_MOUSE	200	S	GVS|79.97|APPAHQASGAK	1	LGSRGVS*APPAHQ	4	78.66	2.5188	0.2274	0.2274	67.43	NO OTHERS:4	GVS|79.97|APPAHQASGAK	4	0	0	0	GVSAPPAHQASGAK	ind_MOUSE.Tryp.TMT.REVUniprot20150423.CONTAM.fasta.hdr	21636	16836	60460	2		21637	72561	16835	4931	3	16837	0.99	21636	60460	16836	4931	2	https://kronos.stanford.edu/cgi-bin/blast_html4?Db=/seq_db/static/ind_MOUSE.Tryp.TMT.REVUniprot20150423.CONTAM.fasta.hdr&Pep=GVSAPPAHQASGAK&MassType=0	https://kronos.stanford.edu/gfy/www/modules/show_out/show_out_wrapper.php?run_id=&search_id=&scans_id=&peptide_id=&scanf=&charge=	https://kronos.stanford.edu/gfy/www/modules/show_out/show_out_wrapper.php?run_id=16837&search_id=21637&scans_id=16835&peptide_id=72561&scanf=4931&charge=3	http://kronos.stanford.edu/gfy/www/modules/sdig/index.php?run_id=16837&search_id=21637&scans_id=16835&peptide_id=72561&scanf=4931	http:/kronos.stanford.edu/gfy/www/modules/ascore/visual/trim-phos.php?run_id=&search_id=21636&scans_id=16836&peptide_id=60460&charge=2	1.47019e+06	0.960606	0.0612066	0.385892	0.109927	0.151966	3.51045
Phosphatidylethanolamine-binding protein 1 OS=Mus musculus GN=Pebp1 PE=4 SV=1	tr|D3Z1V4|D3Z1V4_MOUSE	54	S	VLTPTQVMNRPSSIS|79.97|WDGLDPGK	1	NRPSSIS*WDGLDP	2	0	2.0397	0.0177	0.2831	34.88	NO OTHERS:2	NONE > ascore = 13	2	0	0	2	VLTPTQVMNRPSSISWDGLDPGK	ind_MOUSE.Tryp.TMT.REVUniprot20150423.CONTAM.fasta.hdr	21634	16839	54813	3	16841	21634	54813	16839	40419	3	16841	0.99	21634	54813	16839	40419	3	https://kronos.stanford.edu/cgi-bin/blast_html4?Db=/seq_db/static/ind_MOUSE.Tryp.TMT.REVUniprot20150423.CONTAM.fasta.hdr&Pep=VLTPTQVMNRPSSISWDGLDPGK&MassType=0	https://kronos.stanford.edu/gfy/www/modules/show_out/show_out_wrapper.php?run_id=&search_id=&scans_id=&peptide_id=&scanf=&charge=	https://kronos.stanford.edu/gfy/www/modules/show_out/show_out_wrapper.php?run_id=16841&search_id=21634&scans_id=16839&peptide_id=54813&scanf=40419&charge=3	http://kronos.stanford.edu/gfy/www/modules/sdig/index.php?run_id=16841&search_id=21634&scans_id=16839&peptide_id=54813&scanf=40419	http:/kronos.stanford.edu/gfy/www/modules/ascore/visual/trim-phos.php?run_id=16841&search_id=21634&scans_id=16839&peptide_id=54813&charge=3	1.22236e+06	0.87541	0.104306	0.307968	0.0878623	0.0813113	3.50512
Cordon-bleu protein-like 1 OS=Mus musculus GN=Cobll1 PE=1 SV=1	tr|B1AZ14|B1AZ14_MOUSE	975	S	THS|79.97|APLPNISK	1	LSERTHS*APLPNI	2	5.92	1.7859	0.2603	0.3186	44.56	NO OTHERS:2	NONE > ascore = 13	2	0	0	5	THSAPLPNISK	ind_MOUSE.Tryp.TMT.REVUniprot20150423.CONTAM.fasta.hdr	21636	16836	5176	3	16838	21634	3207	16839	11603	2		0.99	21634	3207	16839	12813	2	https://kronos.stanford.edu/cgi-bin/blast_html4?Db=/seq_db/static/ind_MOUSE.Tryp.TMT.REVUniprot20150423.CONTAM.fasta.hdr&Pep=THSAPLPNISK&MassType=0	https://kronos.stanford.edu/gfy/www/modules/show_out/show_out_wrapper.php?run_id=&search_id=&scans_id=&peptide_id=&scanf=&charge=	https://kronos.stanford.edu/gfy/www/modules/show_out/show_out_wrapper.php?run_id=&search_id=21634&scans_id=16839&peptide_id=3207&scanf=11603&charge=2	http://kronos.stanford.edu/gfy/www/modules/sdig/index.php?run_id=&search_id=21634&scans_id=16839&peptide_id=3207&scanf=11603	http:/kronos.stanford.edu/gfy/www/modules/ascore/visual/trim-phos.php?run_id=16838&search_id=21636&scans_id=16836&peptide_id=5176&charge=3	2.72863e+06	0.970843	0.131401	0.341948	0.0977092	0.119935	3.49965
RelA-associated inhibitor OS=Mus musculus GN=Ppp1r13l PE=1 SV=1	sp|Q5I1X5|IASPP_MOUSE	151	S	AFDGAGS|79.97|PHGR	1	AFDGAGS*PHGRAP	3	1000	2.8939	0.5096	0.5096	50.47	NO OTHERS:3	AFDGAGS|79.97|PHGR	3	0	0	0	AFDGAGSPHGR	ind_MOUSE.Tryp.TMT.REVUniprot20150423.CONTAM.fasta.hdr	21639	16833	80794	2	16835	21638	55562	16834	4024	3		0.99	21637	56135	16835	5389	2	https://kronos.stanford.edu/cgi-bin/blast_html4?Db=/seq_db/static/ind_MOUSE.Tryp.TMT.REVUniprot20150423.CONTAM.fasta.hdr&Pep=AFDGAGSPHGR&MassType=0	https://kronos.stanford.edu/gfy/www/modules/show_out/show_out_wrapper.php?run_id=&search_id=&scans_id=&peptide_id=&scanf=&charge=	https://kronos.stanford.edu/gfy/www/modules/show_out/show_out_wrapper.php?run_id=&search_id=21638&scans_id=16834&peptide_id=55562&scanf=4024&charge=3	http://kronos.stanford.edu/gfy/www/modules/sdig/index.php?run_id=&search_id=21638&scans_id=16834&peptide_id=55562&scanf=4024	http:/kronos.stanford.edu/gfy/www/modules/ascore/visual/trim-phos.php?run_id=16835&search_id=21639&scans_id=16833&peptide_id=80794&charge=2	9.39685e+06	0.857367	0.0645815	0.349491	0.0999031	0.0750921	3.4983
Sorting nexin-15 OS=Mus musculus GN=Snx15 PE=2 SV=1	sp|Q91WE1|SNX15_MOUSE	229	T	GPLSEAELALFDPYSKEESTGPSPT|79.97|HTGELAAIEVESK	1	STGPSPT*HTGELA	1	2.79	5.2353	0.018	0.462	66.78	NO OTHERS:1	NONE > ascore = 13	1	0	0	0	GPLSEAELALFDPYSKEESTGPSPTHTGELAAIEVESK	ind_MOUSE.Tryp.TMT.REVUniprot20150423.CONTAM.fasta.hdr	21636	16836	52332	4	16838	21636	52332	16836	39164	4	16838	0.99	21636	52332	16836	39164	4	https://kronos.stanford.edu/cgi-bin/blast_html4?Db=/seq_db/static/ind_MOUSE.Tryp.TMT.REVUniprot20150423.CONTAM.fasta.hdr&Pep=GPLSEAELALFDPYSKEESTGPSPTHTGELAAIEVESK&MassType=0	https://kronos.stanford.edu/gfy/www/modules/show_out/show_out_wrapper.php?run_id=&search_id=&scans_id=&peptide_id=&scanf=&charge=	https://kronos.stanford.edu/gfy/www/modules/show_out/show_out_wrapper.php?run_id=16838&search_id=21636&scans_id=16836&peptide_id=52332&scanf=39164&charge=4	http://kronos.stanford.edu/gfy/www/modules/sdig/index.php?run_id=16838&search_id=21636&scans_id=16836&peptide_id=52332&scanf=39164	http:/kronos.stanford.edu/gfy/www/modules/ascore/visual/trim-phos.php?run_id=16838&search_id=21636&scans_id=16836&peptide_id=52332&charge=4	101810	0.912302	0.0788322	0.368637	0.105712	0.191895	3.48717
Protein Haus6 OS=Mus musculus GN=Haus6 PE=1 SV=1	tr|Q6NV99|Q6NV99_MOUSE	582	T	T|79.97|PENLITDIR	1	RKQIPRT*PENLIT	1	63.94	2.6716	0.2406	0.2406	66.05	NO OTHERS:1	T|79.97|PENLITDIR	1	0	0	0	TPENLITDIR	ind_MOUSE.Tryp.TMT.REVUniprot20150423.CONTAM.fasta.hdr	21639	16833	37210	2	16835	21639	37210	16833	29632	2	16835	0.99	21639	37210	16833	29632	2	https://kronos.stanford.edu/cgi-bin/blast_html4?Db=/seq_db/static/ind_MOUSE.Tryp.TMT.REVUniprot20150423.CONTAM.fasta.hdr&Pep=TPENLITDIR&MassType=0	https://kronos.stanford.edu/gfy/www/modules/show_out/show_out_wrapper.php?run_id=&search_id=&scans_id=&peptide_id=&scanf=&charge=	https://kronos.stanford.edu/gfy/www/modules/show_out/show_out_wrapper.php?run_id=16835&search_id=21639&scans_id=16833&peptide_id=37210&scanf=29632&charge=2	http://kronos.stanford.edu/gfy/www/modules/sdig/index.php?run_id=16835&search_id=21639&scans_id=16833&peptide_id=37210&scanf=29632	http:/kronos.stanford.edu/gfy/www/modules/ascore/visual/trim-phos.php?run_id=16835&search_id=21639&scans_id=16833&peptide_id=37210&charge=2	455161	0.98106	0.0581929	0.418937	0.120222	0.123045	3.48468
Na(+)/H(+) exchange regulatory cofactor NHE-RF1 OS=Mus musculus GN=Slc9a3r1 PE=1 SV=3	sp|P70441|NHRF1_MOUSE	275	S	EALVEPASES|79.97|PRPALAR	1	VEPASES*PRPALA	1	11.01	2.4304	0.1394	0.2354	45.67	NO OTHERS:1	NONE > ascore = 13	1	0	0	0	EALVEPASESPRPALAR	ind_MOUSE.Tryp.TMT.REVUniprot20150423.CONTAM.fasta.hdr	21638	16834	9865	3	16836	21638	9865	16834	15216	3	16836	0.99	21638	9865	16834	15216	3	https://kronos.stanford.edu/cgi-bin/blast_html4?Db=/seq_db/static/ind_MOUSE.Tryp.TMT.REVUniprot20150423.CONTAM.fasta.hdr&Pep=EALVEPASESPRPALAR&MassType=0	https://kronos.stanford.edu/gfy/www/modules/show_out/show_out_wrapper.php?run_id=&search_id=&scans_id=&peptide_id=&scanf=&charge=	https://kronos.stanford.edu/gfy/www/modules/show_out/show_out_wrapper.php?run_id=16836&search_id=21638&scans_id=16834&peptide_id=9865&scanf=15216&charge=3	http://kronos.stanford.edu/gfy/www/modules/sdig/index.php?run_id=16836&search_id=21638&scans_id=16834&peptide_id=9865&scanf=15216	http:/kronos.stanford.edu/gfy/www/modules/ascore/visual/trim-phos.php?run_id=16836&search_id=21638&scans_id=16834&peptide_id=9865&charge=3	2.61697e+06	0.965395	0.124111	0.339651	0.0974881	0.0917737	3.48402
Protein NEDD1 OS=Mus musculus GN=Nedd1 PE=1 SV=2	sp|P33215|NEDD1_MOUSE	348	S	EAPSPS|79.97|IATVLPQPVTTALGK	1	REAPSPS*IATVLP	1	10.33	2.3619	0.0628	0.5921	53.76	NO OTHERS:1	NONE > ascore = 13	1	0	0	1	EAPSPSIATVLPQPVTTALGK	ind_MOUSE.Tryp.TMT.REVUniprot20150423.CONTAM.fasta.hdr	21634	16839	52588	2	16841	21634	52588	16839	39110	2	16841	0.99	21634	52588	16839	39110	2	https://kronos.stanford.edu/cgi-bin/blast_html4?Db=/seq_db/static/ind_MOUSE.Tryp.TMT.REVUniprot20150423.CONTAM.fasta.hdr&Pep=EAPSPSIATVLPQPVTTALGK&MassType=0	https://kronos.stanford.edu/gfy/www/modules/show_out/show_out_wrapper.php?run_id=&search_id=&scans_id=&peptide_id=&scanf=&charge=	https://kronos.stanford.edu/gfy/www/modules/show_out/show_out_wrapper.php?run_id=16841&search_id=21634&scans_id=16839&peptide_id=52588&scanf=39110&charge=2	http://kronos.stanford.edu/gfy/www/modules/sdig/index.php?run_id=16841&search_id=21634&scans_id=16839&peptide_id=52588&scanf=39110	http:/kronos.stanford.edu/gfy/www/modules/ascore/visual/trim-phos.php?run_id=16841&search_id=21634&scans_id=16839&peptide_id=52588&charge=2	190569	0.951788	0.113813	0.358438	0.103125	0.14274	3.47575
Adaptin ear-binding coat-associated protein 2 OS=Mus musculus GN=Necap2 PE=1 SV=1	sp|Q9D1J1|NECP2_MOUSE	181	S	ARPTS|79.97|AGGLSLLPPPPGGK	1	PRARPTS*AGGLSL	2	0	3.1524	0.0321	0.2975	47.44	NO OTHERS:2	NONE > ascore = 13	2	0	0	0	ARPTSAGGLSLLPPPPGGK	ind_MOUSE.Tryp.TMT.REVUniprot20150423.CONTAM.fasta.hdr	21635	16837	14723	3	16839	21634	21290	16839	21558	3		0.99	21635	14723	16837	18529	3	https://kronos.stanford.edu/cgi-bin/blast_html4?Db=/seq_db/static/ind_MOUSE.Tryp.TMT.REVUniprot20150423.CONTAM.fasta.hdr&Pep=ARPTSAGGLSLLPPPPGGK&MassType=0	https://kronos.stanford.edu/gfy/www/modules/show_out/show_out_wrapper.php?run_id=&search_id=&scans_id=&peptide_id=&scanf=&charge=	https://kronos.stanford.edu/gfy/www/modules/show_out/show_out_wrapper.php?run_id=&search_id=21634&scans_id=16839&peptide_id=21290&scanf=21558&charge=3	http://kronos.stanford.edu/gfy/www/modules/sdig/index.php?run_id=&search_id=21634&scans_id=16839&peptide_id=21290&scanf=21558	http:/kronos.stanford.edu/gfy/www/modules/ascore/visual/trim-phos.php?run_id=16839&search_id=21635&scans_id=16837&peptide_id=14723&charge=3	409154	0.878791	0.143141	0.358018	0.103394	0.123027	3.46265
Paralemmin-1 OS=Mus musculus GN=Palm PE=1 SV=1	sp|Q9Z0P4|PALM_MOUSE	122	S	ENSAAPSPGRPQS|79.97|ASPAKEEQK	1	SPGRPQS*ASPAKE	1	1.27	3.3417	0.0429	0.2102	35.03	NO OTHERS:1	NONE > ascore = 13	1	0	0	1	ENSAAPSPGRPQSASPAKEEQK	ind_MOUSE.Tryp.TMT.REVUniprot20150423.CONTAM.fasta.hdr	21638	16834	78186	4	16836	21638	78186	16834	5548	4	16836	0.99	21638	78186	16834	5548	4	https://kronos.stanford.edu/cgi-bin/blast_html4?Db=/seq_db/static/ind_MOUSE.Tryp.TMT.REVUniprot20150423.CONTAM.fasta.hdr&Pep=ENSAAPSPGRPQSASPAKEEQK&MassType=0	https://kronos.stanford.edu/gfy/www/modules/show_out/show_out_wrapper.php?run_id=&search_id=&scans_id=&peptide_id=&scanf=&charge=	https://kronos.stanford.edu/gfy/www/modules/show_out/show_out_wrapper.php?run_id=16836&search_id=21638&scans_id=16834&peptide_id=78186&scanf=5548&charge=4	http://kronos.stanford.edu/gfy/www/modules/sdig/index.php?run_id=16836&search_id=21638&scans_id=16834&peptide_id=78186&scanf=5548	http:/kronos.stanford.edu/gfy/www/modules/ascore/visual/trim-phos.php?run_id=16836&search_id=21638&scans_id=16834&peptide_id=78186&charge=4	1.92773e+06	0.936305	0.116886	0.312654	0.0903636	0.146438	3.45995
E3 ubiquitin-protein ligase UBR4 OS=Mus musculus GN=Ubr4 PE=1 SV=1	sp|A2AN08|UBR4_MOUSE	178	S	TLSDVEDQKELAS|79.97|PVSPELR	1	DQKELAS*PVSPEL	2	20.8	3.1609	0.1306	0.4586	55.69	NO OTHERS:2	TLSDVEDQKELAS|79.97|PVSPELR	2	0	0	3	TLSDVEDQKELASPVSPELR	ind_MOUSE.Tryp.TMT.REVUniprot20150423.CONTAM.fasta.hdr	21638	16834	26049	3	16836	21638	26049	16834	24504	3	16836	0.99	21638	26049	16834	24504	3	https://kronos.stanford.edu/cgi-bin/blast_html4?Db=/seq_db/static/ind_MOUSE.Tryp.TMT.REVUniprot20150423.CONTAM.fasta.hdr&Pep=TLSDVEDQKELASPVSPELR&MassType=0	https://kronos.stanford.edu/gfy/www/modules/show_out/show_out_wrapper.php?run_id=&search_id=&scans_id=&peptide_id=&scanf=&charge=	https://kronos.stanford.edu/gfy/www/modules/show_out/show_out_wrapper.php?run_id=16836&search_id=21638&scans_id=16834&peptide_id=26049&scanf=24504&charge=3	http://kronos.stanford.edu/gfy/www/modules/sdig/index.php?run_id=16836&search_id=21638&scans_id=16834&peptide_id=26049&scanf=24504	http:/kronos.stanford.edu/gfy/www/modules/ascore/visual/trim-phos.php?run_id=16836&search_id=21638&scans_id=16834&peptide_id=26049&charge=3	3.8342e+06	0.842441	0.0914051	0.289632	0.0840111	0.104752	3.44754
Serine/threonine-protein kinase Nek9 OS=Mus musculus GN=Nek9 PE=1 SV=2	sp|Q8K1R7|NEK9_MOUSE	331	S	S|79.97|STVTEAPIAVVTSR	1	PTKRPRS*STVTEA	3	0	3.2734	0.0082	0.5812	66.8	NO OTHERS:3	NONE > ascore = 13	3	0	0	0	SSTVTEAPIAVVTSR	ind_MOUSE.Tryp.TMT.REVUniprot20150423.CONTAM.fasta.hdr	21638	16834	26557	2	16836	21638	27792	16834	25437	3		0.99	21638	27792	16834	24775	3	https://kronos.stanford.edu/cgi-bin/blast_html4?Db=/seq_db/static/ind_MOUSE.Tryp.TMT.REVUniprot20150423.CONTAM.fasta.hdr&Pep=SSTVTEAPIAVVTSR&MassType=0	https://kronos.stanford.edu/gfy/www/modules/show_out/show_out_wrapper.php?run_id=&search_id=&scans_id=&peptide_id=&scanf=&charge=	https://kronos.stanford.edu/gfy/www/modules/show_out/show_out_wrapper.php?run_id=&search_id=21638&scans_id=16834&peptide_id=27792&scanf=25437&charge=3	http://kronos.stanford.edu/gfy/www/modules/sdig/index.php?run_id=&search_id=21638&scans_id=16834&peptide_id=27792&scanf=25437	http:/kronos.stanford.edu/gfy/www/modules/ascore/visual/trim-phos.php?run_id=16836&search_id=21638&scans_id=16834&peptide_id=26557&charge=2	2.35996e+06	0.985454	0.134752	0.328979	0.095823	0.133722	3.43319
Serine/threonine-protein kinase RIO3 OS=Mus musculus GN=Riok3 PE=1 SV=3	sp|Q9DBU3|RIOK3_MOUSE	512	S	KAASFLKDDGS|79.97|PPVLSAD	1	FLKDDGS*PPVLSA	2	24.67	2.0614	0.2298	0.3198	55.82	NO OTHERS:2	AASFLKDDGS|79.97|PPVLSAD, KAASFLKDDGS|79.97|PPVLSAD	2	0	0	0	AASFLKDDGSPPVLSAD	ind_MOUSE.Tryp.TMT.REVUniprot20150423.CONTAM.fasta.hdr	21634	16839	25888	3	16841	21634	25888	16839	23984	3	16841	0.99	21634	25888	16839	23984	3	https://kronos.stanford.edu/cgi-bin/blast_html4?Db=/seq_db/static/ind_MOUSE.Tryp.TMT.REVUniprot20150423.CONTAM.fasta.hdr&Pep=AASFLKDDGSPPVLSAD&MassType=0	https://kronos.stanford.edu/gfy/www/modules/show_out/show_out_wrapper.php?run_id=&search_id=&scans_id=&peptide_id=&scanf=&charge=	https://kronos.stanford.edu/gfy/www/modules/show_out/show_out_wrapper.php?run_id=16841&search_id=21634&scans_id=16839&peptide_id=25888&scanf=23984&charge=3	http://kronos.stanford.edu/gfy/www/modules/sdig/index.php?run_id=16841&search_id=21634&scans_id=16839&peptide_id=25888&scanf=23984	http:/kronos.stanford.edu/gfy/www/modules/ascore/visual/trim-phos.php?run_id=16841&search_id=21634&scans_id=16839&peptide_id=25888&charge=3	827987	0.904328	0.0971791	0.31467	0.0919664	0.105355	3.42157
Zinc finger protein GLI2 OS=Mus musculus GN=Gli2 PE=1 SV=2	sp|Q0VGT2|GLI2_MOUSE	537	T	HQNRT|79.97|HSNEKPYICK	1	AKHQNRT*HSNEKP	1	18.34	2.3649	0.1814	0.3052	26.24	NO OTHERS:1	HQNRT|79.97|HSNEKPYICK	1	0	0	0	HQNRTHSNEKPYICK	ind_MOUSE.Tryp.TMT.REVUniprot20150423.CONTAM.fasta.hdr	21638	16834	14197	3	16836	21638	14197	16834	17864	3	16836	0.99	21638	14197	16834	17864	3	https://kronos.stanford.edu/cgi-bin/blast_html4?Db=/seq_db/static/ind_MOUSE.Tryp.TMT.REVUniprot20150423.CONTAM.fasta.hdr&Pep=HQNRTHSNEKPYICK&MassType=0	https://kronos.stanford.edu/gfy/www/modules/show_out/show_out_wrapper.php?run_id=&search_id=&scans_id=&peptide_id=&scanf=&charge=	https://kronos.stanford.edu/gfy/www/modules/show_out/show_out_wrapper.php?run_id=16836&search_id=21638&scans_id=16834&peptide_id=14197&scanf=17864&charge=3	http://kronos.stanford.edu/gfy/www/modules/sdig/index.php?run_id=16836&search_id=21638&scans_id=16834&peptide_id=14197&scanf=17864	http:/kronos.stanford.edu/gfy/www/modules/ascore/visual/trim-phos.php?run_id=16836&search_id=21638&scans_id=16834&peptide_id=14197&charge=3	810511	0.953383	0.066869	0.375115	0.109716	0.164569	3.41897
Twinfilin-1 OS=Mus musculus GN=Twf1 PE=1 SV=2	sp|Q91YR1|TWF1_MOUSE	143	S	KYLLSQSS|79.97|PAPLTAAEEELR	1	YLLSQSS*PAPLTA	16	22.01	4.712	0.0353	0.5449	87.58	NO OTHERS:16	KYLLSQSS|79.97|PAPLTAAEEELR	16	0	0	0	YLLSQSSPAPLTAAEEELR	ind_MOUSE.Tryp.TMT.REVUniprot20150423.CONTAM.fasta.hdr	21637	16835	37555	3	16837	21637	37555	16835	30588	3	16837	0.99	21637	37555	16835	30588	3	https://kronos.stanford.edu/cgi-bin/blast_html4?Db=/seq_db/static/ind_MOUSE.Tryp.TMT.REVUniprot20150423.CONTAM.fasta.hdr&Pep=YLLSQSSPAPLTAAEEELR&MassType=0	https://kronos.stanford.edu/gfy/www/modules/show_out/show_out_wrapper.php?run_id=&search_id=&scans_id=&peptide_id=&scanf=&charge=	https://kronos.stanford.edu/gfy/www/modules/show_out/show_out_wrapper.php?run_id=16837&search_id=21637&scans_id=16835&peptide_id=37555&scanf=30588&charge=3	http://kronos.stanford.edu/gfy/www/modules/sdig/index.php?run_id=16837&search_id=21637&scans_id=16835&peptide_id=37555&scanf=30588	http:/kronos.stanford.edu/gfy/www/modules/ascore/visual/trim-phos.php?run_id=16837&search_id=21637&scans_id=16835&peptide_id=37555&charge=3	3.39466e+06	0.989779	0.104936	0.333023	0.0982776	0.130647	3.3886
Baculoviral IAP repeat-containing protein 6 OS=Mus musculus GN=Birc6 PE=1 SV=2	sp|O88738|BIRC6_MOUSE	3768	S	SASHSS|79.97|ATTTVLTTQQR	1	RSASHSS*ATTTVL	1	0	1.5898	0.0018	0.3954	26.47	NO OTHERS:1	NONE > ascore = 13	1	0	0	4	SASHSSATTTVLTTQQR	ind_MOUSE.Tryp.TMT.REVUniprot20150423.CONTAM.fasta.hdr	21634	16839	69892	2	16841	21634	69892	16839	5000	2	16841	0.99	21634	69892	16839	5000	2	https://kronos.stanford.edu/cgi-bin/blast_html4?Db=/seq_db/static/ind_MOUSE.Tryp.TMT.REVUniprot20150423.CONTAM.fasta.hdr&Pep=SASHSSATTTVLTTQQR&MassType=0	https://kronos.stanford.edu/gfy/www/modules/show_out/show_out_wrapper.php?run_id=&search_id=&scans_id=&peptide_id=&scanf=&charge=	https://kronos.stanford.edu/gfy/www/modules/show_out/show_out_wrapper.php?run_id=16841&search_id=21634&scans_id=16839&peptide_id=69892&scanf=5000&charge=2	http://kronos.stanford.edu/gfy/www/modules/sdig/index.php?run_id=16841&search_id=21634&scans_id=16839&peptide_id=69892&scanf=5000	http:/kronos.stanford.edu/gfy/www/modules/ascore/visual/trim-phos.php?run_id=16841&search_id=21634&scans_id=16839&peptide_id=69892&charge=2	97590.7	0.949409	0.143992	0.367967	0.108635	0.119188	3.38719
Interferon regulatory factor 2-binding protein-like OS=Mus musculus GN=Irf2bpl PE=1 SV=1	sp|Q8K3X4|I2BPL_MOUSE	637	S	RNSS|79.97|SPVSPASVPGQR	1	SARRNSS*SPVSPA	1	0	2.039	0.108	0.211	21.17	NO OTHERS:1	NONE > ascore = 13	1	0	0	0	RNSSSPVSPASVPGQR	ind_MOUSE.Tryp.TMT.REVUniprot20150423.CONTAM.fasta.hdr	21637	16835	68631	2	16837	21637	68631	16835	4727	2	16837	0.99	21637	68631	16835	4727	2	https://kronos.stanford.edu/cgi-bin/blast_html4?Db=/seq_db/static/ind_MOUSE.Tryp.TMT.REVUniprot20150423.CONTAM.fasta.hdr&Pep=RNSSSPVSPASVPGQR&MassType=0	https://kronos.stanford.edu/gfy/www/modules/show_out/show_out_wrapper.php?run_id=&search_id=&scans_id=&peptide_id=&scanf=&charge=	https://kronos.stanford.edu/gfy/www/modules/show_out/show_out_wrapper.php?run_id=16837&search_id=21637&scans_id=16835&peptide_id=68631&scanf=4727&charge=2	http://kronos.stanford.edu/gfy/www/modules/sdig/index.php?run_id=16837&search_id=21637&scans_id=16835&peptide_id=68631&scanf=4727	http:/kronos.stanford.edu/gfy/www/modules/ascore/visual/trim-phos.php?run_id=16837&search_id=21637&scans_id=16835&peptide_id=68631&charge=2	228371	0.926885	0.127193	0.376111	0.111709	0.12235	3.36689
Ubiquitin carboxyl-terminal hydrolase OS=Mus musculus GN=Usp8 PE=1 SV=1	tr|A2AI52|A2AI52_MOUSE	591	S	RPADVS|79.97|PASVSGELNAGK	1	KRPADVS*PASVSG	2	40.56	2.9941	0	0.2478	78.13	NO OTHERS:2	RPADVS|79.97|PASVSGELNAGK	2	0	0	1	RPADVSPASVSGELNAGK	ind_MOUSE.Tryp.TMT.REVUniprot20150423.CONTAM.fasta.hdr	21636	16836	9564	3		21636	9564	16836	15396	3		0.99	21637	12506	16835	16911	2	https://kronos.stanford.edu/cgi-bin/blast_html4?Db=/seq_db/static/ind_MOUSE.Tryp.TMT.REVUniprot20150423.CONTAM.fasta.hdr&Pep=RPADVSPASVSGELNAGK&MassType=0	https://kronos.stanford.edu/gfy/www/modules/show_out/show_out_wrapper.php?run_id=&search_id=&scans_id=&peptide_id=&scanf=&charge=	https://kronos.stanford.edu/gfy/www/modules/show_out/show_out_wrapper.php?run_id=&search_id=21636&scans_id=16836&peptide_id=9564&scanf=15396&charge=3	http://kronos.stanford.edu/gfy/www/modules/sdig/index.php?run_id=&search_id=21636&scans_id=16836&peptide_id=9564&scanf=15396	http:/kronos.stanford.edu/gfy/www/modules/ascore/visual/trim-phos.php?run_id=&search_id=21636&scans_id=16836&peptide_id=9564&charge=3	2.41771e+06	0.972141	0.0665337	0.426674	0.126924	0.130415	3.36164
Myc box-dependent-interacting protein 1 OS=Mus musculus GN=Bin1 PE=1 SV=1	sp|O08539|BIN1_MOUSE	296	S	AQPSDNAPEKGNKS|79.97|PS|79.97|PPPDGSPAATPEIR	1	PEKGNKS*PSPPPD	5	17.51	3.8468	0.0729	0.431	77.99	NO OTHERS:2; 298:3	AQPSDNAPEKGNKS|79.97|PS|79.97|PPPDGSPAATPEIR, S|79.97|PS|79.97|PPPDGSPAATPEIR	2	3	0	2	SPSPPPDGSPAATPEIR	ind_MOUSE.Tryp.TMT.REVUniprot20150423.CONTAM.fasta.hdr	21637	16835	3476	3	16835	21637	157	16835	10004	3	16837	0.99	21637	157	16835	10004	3	https://kronos.stanford.edu/cgi-bin/blast_html4?Db=/seq_db/static/ind_MOUSE.Tryp.TMT.REVUniprot20150423.CONTAM.fasta.hdr&Pep=SPSPPPDGSPAATPEIR&MassType=0	https://kronos.stanford.edu/gfy/www/modules/show_out/show_out_wrapper.php?run_id=&search_id=&scans_id=&peptide_id=&scanf=&charge=	https://kronos.stanford.edu/gfy/www/modules/show_out/show_out_wrapper.php?run_id=16837&search_id=21637&scans_id=16835&peptide_id=157&scanf=10004&charge=3	http://kronos.stanford.edu/gfy/www/modules/sdig/index.php?run_id=16837&search_id=21637&scans_id=16835&peptide_id=157&scanf=10004	http:/kronos.stanford.edu/gfy/www/modules/ascore/visual/trim-phos.php?run_id=16835&search_id=21637&scans_id=16835&peptide_id=3476&charge=3	2.03674e+06	0.933375	0.0709512	0.37393	0.111576	0.181369	3.35135
Growth factor receptor-bound protein 10 OS=Mus musculus GN=Grb10 PE=1 SV=1	tr|Q5SUW3|Q5SUW3_MOUSE	430	S	MNILSS|79.97|QS|79.97|PLHPSTLNAVIHR	1	RMNILSS*QSPLHP	4	10.33	3.9312	0.0261	0.4826	48.74	NONE > thresh = 13:1; 432:3	NONE > ascore = 13	0	4	0	3	MNILSSQSPLHPSTLNAVIHR	ind_MOUSE.Tryp.TMT.REVUniprot20150423.CONTAM.fasta.hdr	21636	16836	34250	3	16838	21634	41455	16839	32644	3		0.99	21634	24396	16839	23170	3	https://kronos.stanford.edu/cgi-bin/blast_html4?Db=/seq_db/static/ind_MOUSE.Tryp.TMT.REVUniprot20150423.CONTAM.fasta.hdr&Pep=MNILSSQSPLHPSTLNAVIHR&MassType=0	https://kronos.stanford.edu/gfy/www/modules/show_out/show_out_wrapper.php?run_id=&search_id=&scans_id=&peptide_id=&scanf=&charge=	https://kronos.stanford.edu/gfy/www/modules/show_out/show_out_wrapper.php?run_id=&search_id=21634&scans_id=16839&peptide_id=41455&scanf=32644&charge=3	http://kronos.stanford.edu/gfy/www/modules/sdig/index.php?run_id=&search_id=21634&scans_id=16839&peptide_id=41455&scanf=32644	http:/kronos.stanford.edu/gfy/www/modules/ascore/visual/trim-phos.php?run_id=16838&search_id=21636&scans_id=16836&peptide_id=34250&charge=3	1.20721e+06	0.95808	0.0994088	0.3128	0.0933959	0.156971	3.34918
Transforming acidic coiled-coil-containing protein 2 OS=Mus musculus GN=Tacc2 PE=1 SV=1	tr|E9Q8T1|E9Q8T1_MOUSE	2533	S	GLPSS|79.97|QEPLLQVPEKPSQK	1	ARGLPSS*QEPLLQ	2	16.22	3.2644	0.0465	0.3555	56.36	NO OTHERS:2	GLPSS|79.97|QEPLLQVPEKPSQK	2	0	0	6	GLPSSQEPLLQVPEKPSQK	ind_MOUSE.Tryp.TMT.REVUniprot20150423.CONTAM.fasta.hdr	21634	16839	25946	3		21636	25878	16836	24620	3	16838	0.99	21636	25878	16836	24620	3	https://kronos.stanford.edu/cgi-bin/blast_html4?Db=/seq_db/static/ind_MOUSE.Tryp.TMT.REVUniprot20150423.CONTAM.fasta.hdr&Pep=GLPSSQEPLLQVPEKPSQK&MassType=0	https://kronos.stanford.edu/gfy/www/modules/show_out/show_out_wrapper.php?run_id=&search_id=&scans_id=&peptide_id=&scanf=&charge=	https://kronos.stanford.edu/gfy/www/modules/show_out/show_out_wrapper.php?run_id=16838&search_id=21636&scans_id=16836&peptide_id=25878&scanf=24620&charge=3	http://kronos.stanford.edu/gfy/www/modules/sdig/index.php?run_id=16838&search_id=21636&scans_id=16836&peptide_id=25878&scanf=24620	http:/kronos.stanford.edu/gfy/www/modules/ascore/visual/trim-phos.php?run_id=&search_id=21634&scans_id=16839&peptide_id=25946&charge=3	1.2307e+06	0.962824	0.0712787	0.386456	0.115784	0.156941	3.33774
Equilibrative nucleoside transporter 3 OS=Mus musculus GN=Slc29a3 PE=1 SV=1	tr|D3YWS9|D3YWS9_MOUSE	21	S	APS|79.97|NHQEADQEALLGK	1	AVYRAPS*NHQEAD	2	1000	3.2154	0.2825	0.2825	68.26	NO OTHERS:2	APS|79.97|NHQEADQEALLGK	2	0	0	2	APSNHQEADQEALLGK	ind_MOUSE.Tryp.TMT.REVUniprot20150423.CONTAM.fasta.hdr	21639	16833	17233	3	16835	21639	17233	16833	18680	3	16835	0.99	21638	9701	16834	18680	3	https://kronos.stanford.edu/cgi-bin/blast_html4?Db=/seq_db/static/ind_MOUSE.Tryp.TMT.REVUniprot20150423.CONTAM.fasta.hdr&Pep=APSNHQEADQEALLGK&MassType=0	https://kronos.stanford.edu/gfy/www/modules/show_out/show_out_wrapper.php?run_id=&search_id=&scans_id=&peptide_id=&scanf=&charge=	https://kronos.stanford.edu/gfy/www/modules/show_out/show_out_wrapper.php?run_id=16835&search_id=21639&scans_id=16833&peptide_id=17233&scanf=18680&charge=3	http://kronos.stanford.edu/gfy/www/modules/sdig/index.php?run_id=16835&search_id=21639&scans_id=16833&peptide_id=17233&scanf=18680	http:/kronos.stanford.edu/gfy/www/modules/ascore/visual/trim-phos.php?run_id=16835&search_id=21639&scans_id=16833&peptide_id=17233&charge=3	2.97233e+06	0.967578	0.0561872	0.435627	0.130877	0.125943	3.32852
Calpastatin OS=Mus musculus GN=Cast PE=1 SV=2	sp|P51125|ICAL_MOUSE	79	S	VTASSAATS|79.97|KSPSMSTTETK	1	ASSAATS*KSPSMS	1	4.35	4.0716	0.0038	0.4348	78.88	NO OTHERS:1	NONE > ascore = 13	1	0	0	4	VTASSAATSKSPSMSTTETK	ind_MOUSE.Tryp.TMT.REVUniprot20150423.CONTAM.fasta.hdr	21634	16839	76839	2	16841	21634	76839	16839	8798	2	16841	0.99	21634	76839	16839	8798	2	https://kronos.stanford.edu/cgi-bin/blast_html4?Db=/seq_db/static/ind_MOUSE.Tryp.TMT.REVUniprot20150423.CONTAM.fasta.hdr&Pep=VTASSAATSKSPSMSTTETK&MassType=0	https://kronos.stanford.edu/gfy/www/modules/show_out/show_out_wrapper.php?run_id=&search_id=&scans_id=&peptide_id=&scanf=&charge=	https://kronos.stanford.edu/gfy/www/modules/show_out/show_out_wrapper.php?run_id=16841&search_id=21634&scans_id=16839&peptide_id=76839&scanf=8798&charge=2	http://kronos.stanford.edu/gfy/www/modules/sdig/index.php?run_id=16841&search_id=21634&scans_id=16839&peptide_id=76839&scanf=8798	http:/kronos.stanford.edu/gfy/www/modules/ascore/visual/trim-phos.php?run_id=16841&search_id=21634&scans_id=16839&peptide_id=76839&charge=2	1.09602e+06	0.971104	0.125012	0.324678	0.0976694	0.105725	3.32426
Cdc42 effector protein 3 OS=Mus musculus GN=Cdc42ep3 PE=1 SV=1	sp|Q9CQC5|BORG2_MOUSE	93	S	ANSTSDS|79.97|MFTETPSPVLK	1	ANSTSDS*MFTETP	1	10.33	2.7103	0.0295	0.4676	65.97	NO OTHERS:1	NONE > ascore = 13	1	0	0	0	ANSTSDSMFTETPSPVLK	ind_MOUSE.Tryp.TMT.REVUniprot20150423.CONTAM.fasta.hdr	21636	16836	31548	2	16838	21636	31548	16836	27731	2	16838	0.99	21636	31548	16836	27731	2	https://kronos.stanford.edu/cgi-bin/blast_html4?Db=/seq_db/static/ind_MOUSE.Tryp.TMT.REVUniprot20150423.CONTAM.fasta.hdr&Pep=ANSTSDSMFTETPSPVLK&MassType=0	https://kronos.stanford.edu/gfy/www/modules/show_out/show_out_wrapper.php?run_id=&search_id=&scans_id=&peptide_id=&scanf=&charge=	https://kronos.stanford.edu/gfy/www/modules/show_out/show_out_wrapper.php?run_id=16838&search_id=21636&scans_id=16836&peptide_id=31548&scanf=27731&charge=2	http://kronos.stanford.edu/gfy/www/modules/sdig/index.php?run_id=16838&search_id=21636&scans_id=16836&peptide_id=31548&scanf=27731	http:/kronos.stanford.edu/gfy/www/modules/ascore/visual/trim-phos.php?run_id=16838&search_id=21636&scans_id=16836&peptide_id=31548&charge=2	1.19578e+06	0.989794	0.107733	0.333206	0.100463	0.114812	3.3167
Zyxin OS=Mus musculus GN=Zyx PE=1 SV=2	sp|Q62523|ZYX_MOUSE	269	S	FTPVVS|79.97|KFSPGAPSGPGPQPNQK	1	KFTPVVS*KFSPGA	2	11.72	4.2489	0.0184	0.5183	74.08	NO OTHERS:2	NONE > ascore = 13	2	0	0	0	FTPVVSKFSPGAPSGPGPQPNQK	ind_MOUSE.Tryp.TMT.REVUniprot20150423.CONTAM.fasta.hdr	21634	16839	23309	4		21634	21841	16839	21845	3	16841	0.99	21634	21841	16839	21845	3	https://kronos.stanford.edu/cgi-bin/blast_html4?Db=/seq_db/static/ind_MOUSE.Tryp.TMT.REVUniprot20150423.CONTAM.fasta.hdr&Pep=FTPVVSKFSPGAPSGPGPQPNQK&MassType=0	https://kronos.stanford.edu/gfy/www/modules/show_out/show_out_wrapper.php?run_id=&search_id=&scans_id=&peptide_id=&scanf=&charge=	https://kronos.stanford.edu/gfy/www/modules/show_out/show_out_wrapper.php?run_id=16841&search_id=21634&scans_id=16839&peptide_id=21841&scanf=21845&charge=3	http://kronos.stanford.edu/gfy/www/modules/sdig/index.php?run_id=16841&search_id=21634&scans_id=16839&peptide_id=21841&scanf=21845	http:/kronos.stanford.edu/gfy/www/modules/ascore/visual/trim-phos.php?run_id=&search_id=21634&scans_id=16839&peptide_id=23309&charge=4	1.9863e+06	0.957531	0.131972	0.325575	0.0984407	0.121728	3.30732
Brain acid soluble protein 1 OS=Mus musculus GN=Basp1 PE=1 SV=3	sp|Q91XV3|BASP1_MOUSE	132	T	AGEASAEST|79.97|GAADGAAPEEGEAKK	1	EASAEST*GAADGA	2	6.59	2.6718	0.0129	0.6417	42.95	NO OTHERS:2	NONE > ascore = 13	2	0	0	0	AGEASAESTGAADGAAPEEGEAKK	ind_MOUSE.Tryp.TMT.REVUniprot20150423.CONTAM.fasta.hdr	21638	16834	83079	3	16836	21637	81658	16835	8508	2	16837	0.99	21638	83079	16834	8272	3	https://kronos.stanford.edu/cgi-bin/blast_html4?Db=/seq_db/static/ind_MOUSE.Tryp.TMT.REVUniprot20150423.CONTAM.fasta.hdr&Pep=AGEASAESTGAADGAAPEEGEAKK&MassType=0	https://kronos.stanford.edu/gfy/www/modules/show_out/show_out_wrapper.php?run_id=&search_id=&scans_id=&peptide_id=&scanf=&charge=	https://kronos.stanford.edu/gfy/www/modules/show_out/show_out_wrapper.php?run_id=16837&search_id=21637&scans_id=16835&peptide_id=81658&scanf=8508&charge=2	http://kronos.stanford.edu/gfy/www/modules/sdig/index.php?run_id=16837&search_id=21637&scans_id=16835&peptide_id=81658&scanf=8508	http:/kronos.stanford.edu/gfy/www/modules/ascore/visual/trim-phos.php?run_id=16836&search_id=21638&scans_id=16834&peptide_id=83079&charge=3	544721	0.989114	0.083094	0.376447	0.113906	0.129627	3.3049
MAP/microtubule affinity-regulating kinase 3 OS=Mus musculus GN=Mark3 PE=1 SV=2	sp|Q03141|MARK3_MOUSE	418	Y	RY|79.97|SDHAGPAIPSVVAYPK	1	SQKQRRY*SDHAGP	1	0	3.2996	0.0323	0.3397	44.72	NO OTHERS:1	NONE > ascore = 13	1	0	0	2	RYSDHAGPAIPSVVAYPK	ind_MOUSE.Tryp.TMT.REVUniprot20150423.CONTAM.fasta.hdr	21634	16839	10653	3	16841	21634	10653	16839	15844	3	16841	0.99	21634	10653	16839	15844	3	https://kronos.stanford.edu/cgi-bin/blast_html4?Db=/seq_db/static/ind_MOUSE.Tryp.TMT.REVUniprot20150423.CONTAM.fasta.hdr&Pep=RYSDHAGPAIPSVVAYPK&MassType=0	https://kronos.stanford.edu/gfy/www/modules/show_out/show_out_wrapper.php?run_id=&search_id=&scans_id=&peptide_id=&scanf=&charge=	https://kronos.stanford.edu/gfy/www/modules/show_out/show_out_wrapper.php?run_id=16841&search_id=21634&scans_id=16839&peptide_id=10653&scanf=15844&charge=3	http://kronos.stanford.edu/gfy/www/modules/sdig/index.php?run_id=16841&search_id=21634&scans_id=16839&peptide_id=10653&scanf=15844	http:/kronos.stanford.edu/gfy/www/modules/ascore/visual/trim-phos.php?run_id=16841&search_id=21634&scans_id=16839&peptide_id=10653&charge=3	1.06655e+06	0.945653	0.0921133	0.318465	0.0967076	0.163467	3.29307
Centrosomal protein of 170 kDa (Fragment) OS=Mus musculus GN=Cep170 PE=4 SV=1	tr|A0A0A6YVZ3|A0A0A6YVZ3_MOUSE	171	T	KIPPLVHSKT|79.97|PEGNNGR	1	PLVHSKT*PEGNNG	1	7.78	3.1227	0.0008	0.3197	38.14	NO OTHERS:1	NONE > ascore = 13	1	0	0	5	KIPPLVHSKTPEGNNGR	ind_MOUSE.Tryp.TMT.REVUniprot20150423.CONTAM.fasta.hdr	21634	16839	78337	4	16841	21634	78337	16839	9628	4	16841	0.99	21634	78337	16839	9628	4	https://kronos.stanford.edu/cgi-bin/blast_html4?Db=/seq_db/static/ind_MOUSE.Tryp.TMT.REVUniprot20150423.CONTAM.fasta.hdr&Pep=KIPPLVHSKTPEGNNGR&MassType=0	https://kronos.stanford.edu/gfy/www/modules/show_out/show_out_wrapper.php?run_id=&search_id=&scans_id=&peptide_id=&scanf=&charge=	https://kronos.stanford.edu/gfy/www/modules/show_out/show_out_wrapper.php?run_id=16841&search_id=21634&scans_id=16839&peptide_id=78337&scanf=9628&charge=4	http://kronos.stanford.edu/gfy/www/modules/sdig/index.php?run_id=16841&search_id=21634&scans_id=16839&peptide_id=78337&scanf=9628	http:/kronos.stanford.edu/gfy/www/modules/ascore/visual/trim-phos.php?run_id=16841&search_id=21634&scans_id=16839&peptide_id=78337&charge=4	869382	0.927675	0.124565	0.376938	0.114565	0.120503	3.29018
Protein Tfg (Fragment) OS=Mus musculus GN=Tfg PE=1 SV=1	tr|F6QJV5|F6QJV5_MOUSE	72	T	LLDSLEPPGEPGPST|79.97|SIPENDTVDGREEKPAASDSSGK	1	GEPGPST*SIPEND	1	0	3.7167	0.001	0.3918	30.76	NO OTHERS:1	NONE > ascore = 13	1	0	0	1	LLDSLEPPGEPGPSTSIPENDTVDGREEKPAASDSSGK	ind_MOUSE.Tryp.TMT.REVUniprot20150423.CONTAM.fasta.hdr	21637	16835	29694	4	16837	21637	29694	16835	26362	4	16837	0.99	21637	29694	16835	26362	4	https://kronos.stanford.edu/cgi-bin/blast_html4?Db=/seq_db/static/ind_MOUSE.Tryp.TMT.REVUniprot20150423.CONTAM.fasta.hdr&Pep=LLDSLEPPGEPGPSTSIPENDTVDGREEKPAASDSSGK&MassType=0	https://kronos.stanford.edu/gfy/www/modules/show_out/show_out_wrapper.php?run_id=&search_id=&scans_id=&peptide_id=&scanf=&charge=	https://kronos.stanford.edu/gfy/www/modules/show_out/show_out_wrapper.php?run_id=16837&search_id=21637&scans_id=16835&peptide_id=29694&scanf=26362&charge=4	http://kronos.stanford.edu/gfy/www/modules/sdig/index.php?run_id=16837&search_id=21637&scans_id=16835&peptide_id=29694&scanf=26362	http:/kronos.stanford.edu/gfy/www/modules/ascore/visual/trim-phos.php?run_id=16837&search_id=21637&scans_id=16835&peptide_id=29694&charge=4	233061	0.830795	0.116416	0.324048	0.0985454	0.183544	3.28831
Eukaryotic translation initiation factor 4 gamma 2 (Fragment) OS=Mus musculus GN=Eif4g2 PE=4 SV=1	tr|F6TW20|F6TW20_MOUSE	22	S	FSASSGGGGS|79.97|R	1	SSGGGGS*RGAPQH	1	34.46	1.3422	0.2757	0.2757	29.62	NO OTHERS:1	FSASSGGGGS|79.97|R	1	0	0	6	FSASSGGGGSR	ind_MOUSE.Tryp.TMT.REVUniprot20150423.CONTAM.fasta.hdr	21638	16834	79024	2	16836	21638	79024	16834	6016	2	16836	0.99	21638	79024	16834	6016	2	https://kronos.stanford.edu/cgi-bin/blast_html4?Db=/seq_db/static/ind_MOUSE.Tryp.TMT.REVUniprot20150423.CONTAM.fasta.hdr&Pep=FSASSGGGGSR&MassType=0	https://kronos.stanford.edu/gfy/www/modules/show_out/show_out_wrapper.php?run_id=&search_id=&scans_id=&peptide_id=&scanf=&charge=	https://kronos.stanford.edu/gfy/www/modules/show_out/show_out_wrapper.php?run_id=16836&search_id=21638&scans_id=16834&peptide_id=79024&scanf=6016&charge=2	http://kronos.stanford.edu/gfy/www/modules/sdig/index.php?run_id=16836&search_id=21638&scans_id=16834&peptide_id=79024&scanf=6016	http:/kronos.stanford.edu/gfy/www/modules/ascore/visual/trim-phos.php?run_id=16836&search_id=21638&scans_id=16834&peptide_id=79024&charge=2	1.57374e+06	0.994432	0.0912615	0.39866	0.121484	0.100185	3.28158
Calmodulin-regulated spectrin-associated protein 2 (Fragment) OS=Mus musculus GN=Camsap2 PE=1 SV=1	tr|A0A0A6YXV8|A0A0A6YXV8_MOUSE	636	S	S|79.97|ESVEGFLSPSR	1	GKRTPRS*ESVEGF	1	28.87	1.6976	0.0222	0.2678	56.96	NO OTHERS:1	S|79.97|ESVEGFLSPSR	1	0	0	4	SESVEGFLSPSR	ind_MOUSE.Tryp.TMT.REVUniprot20150423.CONTAM.fasta.hdr	21638	16834	26116	2	16836	21638	26116	16834	24540	2	16836	0.99	21638	26116	16834	24540	2	https://kronos.stanford.edu/cgi-bin/blast_html4?Db=/seq_db/static/ind_MOUSE.Tryp.TMT.REVUniprot20150423.CONTAM.fasta.hdr&Pep=SESVEGFLSPSR&MassType=0	https://kronos.stanford.edu/gfy/www/modules/show_out/show_out_wrapper.php?run_id=&search_id=&scans_id=&peptide_id=&scanf=&charge=	https://kronos.stanford.edu/gfy/www/modules/show_out/show_out_wrapper.php?run_id=16836&search_id=21638&scans_id=16834&peptide_id=26116&scanf=24540&charge=2	http://kronos.stanford.edu/gfy/www/modules/sdig/index.php?run_id=16836&search_id=21638&scans_id=16834&peptide_id=26116&scanf=24540	http:/kronos.stanford.edu/gfy/www/modules/ascore/visual/trim-phos.php?run_id=16836&search_id=21638&scans_id=16834&peptide_id=26116&charge=2	1.66593e+06	0.905731	0.0921684	0.310546	0.0946702	0.181229	3.28029
Proline and serine-rich protein 3 OS=Mus musculus GN=Proser3 PE=2 SV=1	sp|Q7TSA6|PRSR3_MOUSE	138	S	SAVTGPSPTGVSS|79.97|TSLASAPLQK	1	SPTGVSS*TSLASA	1	0	2.6497	0.0003	0.5586	48.12	NO OTHERS:1	NONE > ascore = 13	1	0	0	1	SAVTGPSPTGVSSTSLASAPLQK	ind_MOUSE.Tryp.TMT.REVUniprot20150423.CONTAM.fasta.hdr	21634	16839	20944	2	16841	21634	20944	16839	21387	2	16841	0.99	21634	20944	16839	21387	2	https://kronos.stanford.edu/cgi-bin/blast_html4?Db=/seq_db/static/ind_MOUSE.Tryp.TMT.REVUniprot20150423.CONTAM.fasta.hdr&Pep=SAVTGPSPTGVSSTSLASAPLQK&MassType=0	https://kronos.stanford.edu/gfy/www/modules/show_out/show_out_wrapper.php?run_id=&search_id=&scans_id=&peptide_id=&scanf=&charge=	https://kronos.stanford.edu/gfy/www/modules/show_out/show_out_wrapper.php?run_id=16841&search_id=21634&scans_id=16839&peptide_id=20944&scanf=21387&charge=2	http://kronos.stanford.edu/gfy/www/modules/sdig/index.php?run_id=16841&search_id=21634&scans_id=16839&peptide_id=20944&scanf=21387	http:/kronos.stanford.edu/gfy/www/modules/ascore/visual/trim-phos.php?run_id=16841&search_id=21634&scans_id=16839&peptide_id=20944&charge=2	176369	0.930167	0.139131	0.324827	0.0994108	0.155907	3.26752
Disabled homolog 2 OS=Mus musculus GN=Dab2 PE=1 SV=1	tr|E9QL31|E9QL31_MOUSE	372	S	S|79.97|SPNPFVGSPPK	1	NGFHIKS*SPNPFV	1	0	2.3835	0.0503	0.4742	80.86	NO OTHERS:1	NONE > ascore = 13	1	0	0	3	SSPNPFVGSPPK	ind_MOUSE.Tryp.TMT.REVUniprot20150423.CONTAM.fasta.hdr	21634	16839	11795	2	16841	21634	11795	16839	16513	2	16841	0.99	21634	11795	16839	16513	2	https://kronos.stanford.edu/cgi-bin/blast_html4?Db=/seq_db/static/ind_MOUSE.Tryp.TMT.REVUniprot20150423.CONTAM.fasta.hdr&Pep=SSPNPFVGSPPK&MassType=0	https://kronos.stanford.edu/gfy/www/modules/show_out/show_out_wrapper.php?run_id=&search_id=&scans_id=&peptide_id=&scanf=&charge=	https://kronos.stanford.edu/gfy/www/modules/show_out/show_out_wrapper.php?run_id=16841&search_id=21634&scans_id=16839&peptide_id=11795&scanf=16513&charge=2	http://kronos.stanford.edu/gfy/www/modules/sdig/index.php?run_id=16841&search_id=21634&scans_id=16839&peptide_id=11795&scanf=16513	http:/kronos.stanford.edu/gfy/www/modules/ascore/visual/trim-phos.php?run_id=16841&search_id=21634&scans_id=16839&peptide_id=11795&charge=2	587275	0.930468	0.136902	0.341514	0.105151	0.139345	3.24784
CLIP-associating protein 1 OS=Mus musculus GN=Clasp1 PE=1 SV=1	tr|A0A087WNW8|A0A087WNW8_MOUSE	709	S	LLGSGLAGGS|79.97|SRGPPVTPSSEKR	1	SGLAGGS*SRGPPV	1	0	2.6514	0.0214	0.2837	36.55	NO OTHERS:1	NONE > ascore = 13	1	0	0	13	LLGSGLAGGSSRGPPVTPSSEKR	ind_MOUSE.Tryp.TMT.REVUniprot20150423.CONTAM.fasta.hdr	21634	16839	7366	3	16841	21634	7366	16839	13966	3	16841	0.99	21634	7366	16839	13966	3	https://kronos.stanford.edu/cgi-bin/blast_html4?Db=/seq_db/static/ind_MOUSE.Tryp.TMT.REVUniprot20150423.CONTAM.fasta.hdr&Pep=LLGSGLAGGSSRGPPVTPSSEKR&MassType=0	https://kronos.stanford.edu/gfy/www/modules/show_out/show_out_wrapper.php?run_id=&search_id=&scans_id=&peptide_id=&scanf=&charge=	https://kronos.stanford.edu/gfy/www/modules/show_out/show_out_wrapper.php?run_id=16841&search_id=21634&scans_id=16839&peptide_id=7366&scanf=13966&charge=3	http://kronos.stanford.edu/gfy/www/modules/sdig/index.php?run_id=16841&search_id=21634&scans_id=16839&peptide_id=7366&scanf=13966	http:/kronos.stanford.edu/gfy/www/modules/ascore/visual/trim-phos.php?run_id=16841&search_id=21634&scans_id=16839&peptide_id=7366&charge=3	388642	0.991218	0.103898	0.368425	0.113527	0.128249	3.24526
Core-binding factor subunit beta OS=Mus musculus GN=Cbfb PE=1 SV=1	sp|Q08024|PEBB_MOUSE	173	S	RQQDPS|79.97|PGSNLGGGDDLK	1	RRQQDPS*PGSNLG	2	8.7	3.2442	0.0068	0.4377	55.79	NO OTHERS:2	NONE > ascore = 13	2	0	0	2	RQQDPSPGSNLGGGDDLK	ind_MOUSE.Tryp.TMT.REVUniprot20150423.CONTAM.fasta.hdr	21638	16834	599	3	16836	21638	3652	16834	11841	3	16836	0.99	21638	3652	16834	11841	3	https://kronos.stanford.edu/cgi-bin/blast_html4?Db=/seq_db/static/ind_MOUSE.Tryp.TMT.REVUniprot20150423.CONTAM.fasta.hdr&Pep=RQQDPSPGSNLGGGDDLK&MassType=0	https://kronos.stanford.edu/gfy/www/modules/show_out/show_out_wrapper.php?run_id=&search_id=&scans_id=&peptide_id=&scanf=&charge=	https://kronos.stanford.edu/gfy/www/modules/show_out/show_out_wrapper.php?run_id=16836&search_id=21638&scans_id=16834&peptide_id=3652&scanf=11841&charge=3	http://kronos.stanford.edu/gfy/www/modules/sdig/index.php?run_id=16836&search_id=21638&scans_id=16834&peptide_id=3652&scanf=11841	http:/kronos.stanford.edu/gfy/www/modules/ascore/visual/trim-phos.php?run_id=16836&search_id=21638&scans_id=16834&peptide_id=599&charge=3	1.95687e+06	0.950611	0.147612	0.336657	0.104378	0.114096	3.22536
GLI-Kruppel family member (Fragment) OS=Mus musculus GN=Gli2 PE=2 SV=1	tr|A5AA27|A5AA27_MOUSE	182	S	GLS|79.97|PADVAHEHLK	1	SAARGLS*PADVAH	1	1000	3.191	0.4978	0.4978	54.31	NO OTHERS:1	GLS|79.97|PADVAHEHLK	1	0	0	1	GLSPADVAHEHLK	ind_MOUSE.Tryp.TMT.REVUniprot20150423.CONTAM.fasta.hdr	21637	16835	7656	3	16837	21637	7656	16835	14063	3	16837	0.99	21637	7656	16835	14063	3	https://kronos.stanford.edu/cgi-bin/blast_html4?Db=/seq_db/static/ind_MOUSE.Tryp.TMT.REVUniprot20150423.CONTAM.fasta.hdr&Pep=GLSPADVAHEHLK&MassType=0	https://kronos.stanford.edu/gfy/www/modules/show_out/show_out_wrapper.php?run_id=&search_id=&scans_id=&peptide_id=&scanf=&charge=	https://kronos.stanford.edu/gfy/www/modules/show_out/show_out_wrapper.php?run_id=16837&search_id=21637&scans_id=16835&peptide_id=7656&scanf=14063&charge=3	http://kronos.stanford.edu/gfy/www/modules/sdig/index.php?run_id=16837&search_id=21637&scans_id=16835&peptide_id=7656&scanf=14063	http:/kronos.stanford.edu/gfy/www/modules/ascore/visual/trim-phos.php?run_id=16837&search_id=21637&scans_id=16835&peptide_id=7656&charge=3	2.27264e+06	0.973777	0.0979564	0.357775	0.111782	0.148354	3.20064
Vimentin OS=Mus musculus GN=Vim PE=1 SV=1	tr|A0A0A6YWC8|A0A0A6YWC8_MOUSE	56	S	SLYSSS|79.97|PGGAYVTR	1	RSLYSSS*PGGAYV	4	38.62	2.1327	0.0276	0.3732	40.36	NO OTHERS:3; NONE > thresh = 13:1	SLYSSS|79.97|PGGAYVTR	3	1	0	2	SLYSSSPGGAYVTR	ind_MOUSE.Tryp.TMT.REVUniprot20150423.CONTAM.fasta.hdr	21636	16836	8240	2	16836	21638	21685	16834	22178	2	16836	0.99	21638	21685	16834	22178	2	https://kronos.stanford.edu/cgi-bin/blast_html4?Db=/seq_db/static/ind_MOUSE.Tryp.TMT.REVUniprot20150423.CONTAM.fasta.hdr&Pep=SLYSSSPGGAYVTR&MassType=0	https://kronos.stanford.edu/gfy/www/modules/show_out/show_out_wrapper.php?run_id=&search_id=&scans_id=&peptide_id=&scanf=&charge=	https://kronos.stanford.edu/gfy/www/modules/show_out/show_out_wrapper.php?run_id=16836&search_id=21638&scans_id=16834&peptide_id=21685&scanf=22178&charge=2	http://kronos.stanford.edu/gfy/www/modules/sdig/index.php?run_id=16836&search_id=21638&scans_id=16834&peptide_id=21685&scanf=22178	http:/kronos.stanford.edu/gfy/www/modules/ascore/visual/trim-phos.php?run_id=16836&search_id=21636&scans_id=16836&peptide_id=8240&charge=2	7.37688e+06	0.990307	0.115792	0.323078	0.101048	0.136525	3.19727
E3 ubiquitin-protein ligase UBR5 OS=Mus musculus GN=Ubr5 PE=4 SV=1	tr|E9Q2H1|E9Q2H1_MOUSE	1312	S	KTASPEDS|79.97|DMPDHDLEPPR	1	TASPEDS*DMPDHD	1	6.71	3.2342	0.0571	0.4082	44.17	NO OTHERS:1	NONE > ascore = 13	1	0	0	1	KTASPEDSDMPDHDLEPPR	ind_MOUSE.Tryp.TMT.REVUniprot20150423.CONTAM.fasta.hdr	21639	16833	8766	4	16835	21639	8766	16833	14272	4	16835	0.99	21639	8766	16833	14272	4	https://kronos.stanford.edu/cgi-bin/blast_html4?Db=/seq_db/static/ind_MOUSE.Tryp.TMT.REVUniprot20150423.CONTAM.fasta.hdr&Pep=KTASPEDSDMPDHDLEPPR&MassType=0	https://kronos.stanford.edu/gfy/www/modules/show_out/show_out_wrapper.php?run_id=&search_id=&scans_id=&peptide_id=&scanf=&charge=	https://kronos.stanford.edu/gfy/www/modules/show_out/show_out_wrapper.php?run_id=16835&search_id=21639&scans_id=16833&peptide_id=8766&scanf=14272&charge=4	http://kronos.stanford.edu/gfy/www/modules/sdig/index.php?run_id=16835&search_id=21639&scans_id=16833&peptide_id=8766&scanf=14272	http:/kronos.stanford.edu/gfy/www/modules/ascore/visual/trim-phos.php?run_id=16835&search_id=21639&scans_id=16833&peptide_id=8766&charge=4	522254	0.949175	0.0813582	0.343331	0.107578	0.0967408	3.19148
Rab11 family-interacting protein 5 OS=Mus musculus GN=Rab11fip5 PE=1 SV=2	sp|Q8R361|RFIP5_MOUSE	633	S	IMETS|79.97|PT|79.97|LLQISPGPPK	1	VRIMETS*PTLLQI	2	8.4	2.2628	0.0023	0.2135	34.94	26 days, 11:02:00	NONE > ascore = 13	0	2	0	0	IMETSPTLLQISPGPPK	ind_MOUSE.Tryp.TMT.REVUniprot20150423.CONTAM.fasta.hdr	21637	16835	52318	3	16837	21637	52318	16835	38516	3	16837	0.99	21637	52318	16835	38516	3	https://kronos.stanford.edu/cgi-bin/blast_html4?Db=/seq_db/static/ind_MOUSE.Tryp.TMT.REVUniprot20150423.CONTAM.fasta.hdr&Pep=IMETSPTLLQISPGPPK&MassType=0	https://kronos.stanford.edu/gfy/www/modules/show_out/show_out_wrapper.php?run_id=&search_id=&scans_id=&peptide_id=&scanf=&charge=	https://kronos.stanford.edu/gfy/www/modules/show_out/show_out_wrapper.php?run_id=16837&search_id=21637&scans_id=16835&peptide_id=52318&scanf=38516&charge=3	http://kronos.stanford.edu/gfy/www/modules/sdig/index.php?run_id=16837&search_id=21637&scans_id=16835&peptide_id=52318&scanf=38516	http:/kronos.stanford.edu/gfy/www/modules/ascore/visual/trim-phos.php?run_id=16837&search_id=21637&scans_id=16835&peptide_id=52318&charge=3	312705	0.955641	0.0961234	0.373211	0.117068	0.16037	3.18798
Rab11 family-interacting protein 5 OS=Mus musculus GN=Rab11fip5 PE=1 SV=2	sp|Q8R361|RFIP5_MOUSE	635	T	IMETS|79.97|PT|79.97|LLQISPGPPK	2	IMETSPT*LLQISP	2		2.2628	0.0023	0.2135	34.94	NONE > thresh = 13:2	NONE > ascore = 13	0	2	0	0	IMETSPTLLQISPGPPK	ind_MOUSE.Tryp.TMT.REVUniprot20150423.CONTAM.fasta.hdr	21637	16835	52318	3	16837	21637	52318	16835	38516	3	16837	0.99	21637	52318	16835	38516	3	https://kronos.stanford.edu/cgi-bin/blast_html4?Db=/seq_db/static/ind_MOUSE.Tryp.TMT.REVUniprot20150423.CONTAM.fasta.hdr&Pep=IMETSPTLLQISPGPPK&MassType=0	https://kronos.stanford.edu/gfy/www/modules/show_out/show_out_wrapper.php?run_id=&search_id=&scans_id=&peptide_id=&scanf=&charge=	https://kronos.stanford.edu/gfy/www/modules/show_out/show_out_wrapper.php?run_id=16837&search_id=21637&scans_id=16835&peptide_id=52318&scanf=38516&charge=3	http://kronos.stanford.edu/gfy/www/modules/sdig/index.php?run_id=16837&search_id=21637&scans_id=16835&peptide_id=52318&scanf=38516	http:/kronos.stanford.edu/gfy/www/modules/ascore/visual/trim-phos.php?run_id=16837&search_id=21637&scans_id=16835&peptide_id=52318&charge=3	312705	0.955641	0.0961234	0.373211	0.117068	0.16037	3.18798
Ubiquitin conjugation factor E4 B (Fragment) OS=Mus musculus GN=Ube4b PE=4 SV=1	tr|H7BXC2|H7BXC2_MOUSE	91	S	HLLNS|79.97|PTDPFNR	1	LRHLLNS*PTDPFN	1	13.27	1.6765	0.0553	0.3788	35.87	NO OTHERS:1	HLLNS|79.97|PTDPFNR	1	0	0	1	HLLNSPTDPFNR	ind_MOUSE.Tryp.TMT.REVUniprot20150423.CONTAM.fasta.hdr	21636	16836	12334	2	16838	21636	12334	16836	17028	2	16838	0.99	21636	12334	16836	17028	2	https://kronos.stanford.edu/cgi-bin/blast_html4?Db=/seq_db/static/ind_MOUSE.Tryp.TMT.REVUniprot20150423.CONTAM.fasta.hdr&Pep=HLLNSPTDPFNR&MassType=0	https://kronos.stanford.edu/gfy/www/modules/show_out/show_out_wrapper.php?run_id=&search_id=&scans_id=&peptide_id=&scanf=&charge=	https://kronos.stanford.edu/gfy/www/modules/show_out/show_out_wrapper.php?run_id=16838&search_id=21636&scans_id=16836&peptide_id=12334&scanf=17028&charge=2	http://kronos.stanford.edu/gfy/www/modules/sdig/index.php?run_id=16838&search_id=21636&scans_id=16836&peptide_id=12334&scanf=17028	http:/kronos.stanford.edu/gfy/www/modules/ascore/visual/trim-phos.php?run_id=16838&search_id=21636&scans_id=16836&peptide_id=12334&charge=2	1.05575e+06	0.944311	0.089773	0.336868	0.106631	0.106278	3.1592
Cytoplasmic dynein 1 intermediate chain 2 OS=Mus musculus GN=Dync1i2 PE=1 SV=1	tr|A2BFF8|A2BFF8_MOUSE	73	S	EAEALLQSMGLTTDS|79.97|PIVPPPMS|79.97|PSSK	1	MGLTTDS*PIVPPP	3	17.12	4.464	0.0004	0.2293	57.22	NO OTHERS:1; 81:2	EAEALLQSMGLTTDS|79.97|PIVPPPMS|79.97|PSSK	1	2	0	2	EAEALLQSMGLTTDSPIVPPPMSPSSK	ind_MOUSE.Tryp.TMT.REVUniprot20150423.CONTAM.fasta.hdr	21637	16835	49265	4	16837	21637	71888	16835	48977	4		0.99	21637	49265	16835	36882	4	https://kronos.stanford.edu/cgi-bin/blast_html4?Db=/seq_db/static/ind_MOUSE.Tryp.TMT.REVUniprot20150423.CONTAM.fasta.hdr&Pep=EAEALLQSMGLTTDSPIVPPPMSPSSK&MassType=0	https://kronos.stanford.edu/gfy/www/modules/show_out/show_out_wrapper.php?run_id=&search_id=&scans_id=&peptide_id=&scanf=&charge=	https://kronos.stanford.edu/gfy/www/modules/show_out/show_out_wrapper.php?run_id=&search_id=21637&scans_id=16835&peptide_id=71888&scanf=48977&charge=4	http://kronos.stanford.edu/gfy/www/modules/sdig/index.php?run_id=&search_id=21637&scans_id=16835&peptide_id=71888&scanf=48977	http:/kronos.stanford.edu/gfy/www/modules/ascore/visual/trim-phos.php?run_id=16837&search_id=21637&scans_id=16835&peptide_id=49265&charge=4	154551	0.962293	0.0427211	0.427291	0.136325	0.128761	3.13436
5'-3' exoribonuclease 2 OS=Mus musculus GN=Xrn2 PE=1 SV=1	sp|Q9DBR1|XRN2_MOUSE	470	S	NS|79.97|SPSISPNTSFASDGSPSPLGGIKR	1	MRMQRNS*SPSISP	1	0	4.3902	0.0405	0.5637	64.98	NO OTHERS:1	NONE > ascore = 13	1	0	0	1	NSSPSISPNTSFASDGSPSPLGGIKR	ind_MOUSE.Tryp.TMT.REVUniprot20150423.CONTAM.fasta.hdr	21634	16839	16917	3	16841	21634	16917	16839	19344	3	16841	0.99	21634	16917	16839	19344	3	https://kronos.stanford.edu/cgi-bin/blast_html4?Db=/seq_db/static/ind_MOUSE.Tryp.TMT.REVUniprot20150423.CONTAM.fasta.hdr&Pep=NSSPSISPNTSFASDGSPSPLGGIKR&MassType=0	https://kronos.stanford.edu/gfy/www/modules/show_out/show_out_wrapper.php?run_id=&search_id=&scans_id=&peptide_id=&scanf=&charge=	https://kronos.stanford.edu/gfy/www/modules/show_out/show_out_wrapper.php?run_id=16841&search_id=21634&scans_id=16839&peptide_id=16917&scanf=19344&charge=3	http://kronos.stanford.edu/gfy/www/modules/sdig/index.php?run_id=16841&search_id=21634&scans_id=16839&peptide_id=16917&scanf=19344	http:/kronos.stanford.edu/gfy/www/modules/ascore/visual/trim-phos.php?run_id=16841&search_id=21634&scans_id=16839&peptide_id=16917&charge=3	503842	0.876789	0.188429	0.300103	0.0963286	0.115891	3.11541
Protein transport protein Sec31A OS=Mus musculus GN=Sec31a PE=1 SV=2	sp|Q3UPL0|SC31A_MOUSE	801	S	AQGKPVSGQESSQS|79.97|PYER	1	GQESSQS*PYERQP	3	10.36	3.0606	0.054	0.2151	54.76	NO OTHERS:3	NONE > ascore = 13	3	0	0	4	AQGKPVSGQESSQSPYER	ind_MOUSE.Tryp.TMT.REVUniprot20150423.CONTAM.fasta.hdr	21638	16834	78006	3		21637	74967	16835	5070	3		0.99	21638	78006	16834	4830	3	https://kronos.stanford.edu/cgi-bin/blast_html4?Db=/seq_db/static/ind_MOUSE.Tryp.TMT.REVUniprot20150423.CONTAM.fasta.hdr&Pep=AQGKPVSGQESSQSPYER&MassType=0	https://kronos.stanford.edu/gfy/www/modules/show_out/show_out_wrapper.php?run_id=&search_id=&scans_id=&peptide_id=&scanf=&charge=	https://kronos.stanford.edu/gfy/www/modules/show_out/show_out_wrapper.php?run_id=&search_id=21637&scans_id=16835&peptide_id=74967&scanf=5070&charge=3	http://kronos.stanford.edu/gfy/www/modules/sdig/index.php?run_id=&search_id=21637&scans_id=16835&peptide_id=74967&scanf=5070	http:/kronos.stanford.edu/gfy/www/modules/ascore/visual/trim-phos.php?run_id=&search_id=21638&scans_id=16834&peptide_id=78006&charge=3	3.67898e+06	0.987706	0.133239	0.337223	0.108285	0.131968	3.11422
CAP-Gly domain-containing linker protein 2 OS=Mus musculus GN=Clip2 PE=1 SV=2	sp|Q9Z0H8|CLIP2_MOUSE	924	S	VLLLEANRHS|79.97|PGPER	1	LEANRHS*PGPERD	1	1000	2.0228	0.3813	0.3813	35.24	NO OTHERS:1	VLLLEANRHS|79.97|PGPER	1	0	0	1	VLLLEANRHSPGPER	ind_MOUSE.Tryp.TMT.REVUniprot20150423.CONTAM.fasta.hdr	21635	16837	5058	3	16839	21635	5058	16837	12993	3	16839	0.99	21635	5058	16837	12993	3	https://kronos.stanford.edu/cgi-bin/blast_html4?Db=/seq_db/static/ind_MOUSE.Tryp.TMT.REVUniprot20150423.CONTAM.fasta.hdr&Pep=VLLLEANRHSPGPER&MassType=0	https://kronos.stanford.edu/gfy/www/modules/show_out/show_out_wrapper.php?run_id=&search_id=&scans_id=&peptide_id=&scanf=&charge=	https://kronos.stanford.edu/gfy/www/modules/show_out/show_out_wrapper.php?run_id=16839&search_id=21635&scans_id=16837&peptide_id=5058&scanf=12993&charge=3	http://kronos.stanford.edu/gfy/www/modules/sdig/index.php?run_id=16839&search_id=21635&scans_id=16837&peptide_id=5058&scanf=12993	http:/kronos.stanford.edu/gfy/www/modules/ascore/visual/trim-phos.php?run_id=16839&search_id=21635&scans_id=16837&peptide_id=5058&charge=3	78575	0.94734	0.14454	0.28819	0.0926201	0.149247	3.11153
CDK5 regulatory subunit-associated protein 2 OS=Mus musculus GN=Cdk5rap2 PE=1 SV=3	sp|Q8K389|CK5P2_MOUSE	1195	T	ILRPLT|79.97|PEMIDGK	1	KILRPLT*PEMIDG	1	1000	1.8653	0.2511	0.2511	27.67	NO OTHERS:1	ILRPLT|79.97|PEMIDGK	1	0	0	0	ILRPLTPEMIDGK	ind_MOUSE.Tryp.TMT.REVUniprot20150423.CONTAM.fasta.hdr	21636	16836	31800	3	16838	21636	31800	16836	27870	3	16838	0.99	21636	31800	16836	27870	3	https://kronos.stanford.edu/cgi-bin/blast_html4?Db=/seq_db/static/ind_MOUSE.Tryp.TMT.REVUniprot20150423.CONTAM.fasta.hdr&Pep=ILRPLTPEMIDGK&MassType=0	https://kronos.stanford.edu/gfy/www/modules/show_out/show_out_wrapper.php?run_id=&search_id=&scans_id=&peptide_id=&scanf=&charge=	https://kronos.stanford.edu/gfy/www/modules/show_out/show_out_wrapper.php?run_id=16838&search_id=21636&scans_id=16836&peptide_id=31800&scanf=27870&charge=3	http://kronos.stanford.edu/gfy/www/modules/sdig/index.php?run_id=16838&search_id=21636&scans_id=16836&peptide_id=31800&scanf=27870	http:/kronos.stanford.edu/gfy/www/modules/ascore/visual/trim-phos.php?run_id=16838&search_id=21636&scans_id=16836&peptide_id=31800&charge=3	315587	0.543492	0.0721001	0.220132	0.0708149	0.179224	3.10855
Protein Gcn1l1 OS=Mus musculus GN=Gcn1l1 PE=4 SV=1	tr|E9PVA8|E9PVA8_MOUSE	723	S	ITTQSPLNQSS|79.97|MNAMGSLSVLSPDR	1	SPLNQSS*MNAMGS	1	0	2.0498	0.0025	0.3744	11.32	NO OTHERS:1	NONE > ascore = 13	1	0	0	0	ITTQSPLNQSSMNAMGSLSVLSPDR	ind_MOUSE.Tryp.TMT.REVUniprot20150423.CONTAM.fasta.hdr	21634	16839	42303	2	16841	21634	42303	16839	33112	2	16841	0.99	21634	42303	16839	33112	2	https://kronos.stanford.edu/cgi-bin/blast_html4?Db=/seq_db/static/ind_MOUSE.Tryp.TMT.REVUniprot20150423.CONTAM.fasta.hdr&Pep=ITTQSPLNQSSMNAMGSLSVLSPDR&MassType=0	https://kronos.stanford.edu/gfy/www/modules/show_out/show_out_wrapper.php?run_id=&search_id=&scans_id=&peptide_id=&scanf=&charge=	https://kronos.stanford.edu/gfy/www/modules/show_out/show_out_wrapper.php?run_id=16841&search_id=21634&scans_id=16839&peptide_id=42303&scanf=33112&charge=2	http://kronos.stanford.edu/gfy/www/modules/sdig/index.php?run_id=16841&search_id=21634&scans_id=16839&peptide_id=42303&scanf=33112	http:/kronos.stanford.edu/gfy/www/modules/ascore/visual/trim-phos.php?run_id=16841&search_id=21634&scans_id=16839&peptide_id=42303&charge=2	84574.9	0.970103	0.129963	0.311825	0.100555	0.110851	3.10105
TBC1 domain family member 5 OS=Mus musculus GN=Tbc1d5 PE=1 SV=2	sp|Q80XQ2|TBCD5_MOUSE	470	S	KLIS|79.97|PASAPGSMGGPVPGNNSSSSFSAAIPTR	1	FGRKLIS*PASAPG	1	7.07	3.2764	0.0036	0.4056	22.25	NO OTHERS:1	NONE > ascore = 13	1	0	0	0	KLISPASAPGSMGGPVPGNNSSSSFSAAIPTR	ind_MOUSE.Tryp.TMT.REVUniprot20150423.CONTAM.fasta.hdr	21634	16839	27631	3	16841	21634	27631	16839	24973	3	16841	0.99	21634	27631	16839	24973	3	https://kronos.stanford.edu/cgi-bin/blast_html4?Db=/seq_db/static/ind_MOUSE.Tryp.TMT.REVUniprot20150423.CONTAM.fasta.hdr&Pep=KLISPASAPGSMGGPVPGNNSSSSFSAAIPTR&MassType=0	https://kronos.stanford.edu/gfy/www/modules/show_out/show_out_wrapper.php?run_id=&search_id=&scans_id=&peptide_id=&scanf=&charge=	https://kronos.stanford.edu/gfy/www/modules/show_out/show_out_wrapper.php?run_id=16841&search_id=21634&scans_id=16839&peptide_id=27631&scanf=24973&charge=3	http://kronos.stanford.edu/gfy/www/modules/sdig/index.php?run_id=16841&search_id=21634&scans_id=16839&peptide_id=27631&scanf=24973	http:/kronos.stanford.edu/gfy/www/modules/ascore/visual/trim-phos.php?run_id=16841&search_id=21634&scans_id=16839&peptide_id=27631&charge=3	149658	0.941097	0.0897087	0.336909	0.108735	0.127207	3.09845
Serine/threonine-protein kinase WNK1 OS=Mus musculus GN=Wnk1 PE=1 SV=2	sp|P83741|WNK1_MOUSE	1256	S	FIVS|79.97|PVPESR	1	GRRFIVS*PVPESR	2	28.35	1.9286	0.1093	0.3483	36.3	NO OTHERS:2	FIVS|79.97|PVPESR	2	0	0	4	FIVSPVPESR	ind_MOUSE.Tryp.TMT.REVUniprot20150423.CONTAM.fasta.hdr	21637	16835	28129	2	16837	21637	28129	16835	25531	2	16837	0.99	21637	28129	16835	25531	2	https://kronos.stanford.edu/cgi-bin/blast_html4?Db=/seq_db/static/ind_MOUSE.Tryp.TMT.REVUniprot20150423.CONTAM.fasta.hdr&Pep=FIVSPVPESR&MassType=0	https://kronos.stanford.edu/gfy/www/modules/show_out/show_out_wrapper.php?run_id=&search_id=&scans_id=&peptide_id=&scanf=&charge=	https://kronos.stanford.edu/gfy/www/modules/show_out/show_out_wrapper.php?run_id=16837&search_id=21637&scans_id=16835&peptide_id=28129&scanf=25531&charge=2	http://kronos.stanford.edu/gfy/www/modules/sdig/index.php?run_id=16837&search_id=21637&scans_id=16835&peptide_id=28129&scanf=25531	http:/kronos.stanford.edu/gfy/www/modules/ascore/visual/trim-phos.php?run_id=16837&search_id=21637&scans_id=16835&peptide_id=28129&charge=2	1.01193e+06	0.978207	0.0846997	0.374466	0.121418	0.136458	3.0841
Rho GTPase-activating protein 1 OS=Mus musculus GN=Arhgap1 PE=4 SV=1	tr|A2AH25|A2AH25_MOUSE	91	S	SSS|79.97|PEPVTHLK	1	DDSKSSS*PEPVTH	2	6.36	2.6872	0.0337	0.3437	64.44	NO OTHERS:2	NONE > ascore = 13	2	0	0	1	SSSPEPVTHLK	ind_MOUSE.Tryp.TMT.REVUniprot20150423.CONTAM.fasta.hdr	21638	16834	582	3	16836	21638	582	16834	10231	3	16836	0.99	21638	582	16834	10231	3	https://kronos.stanford.edu/cgi-bin/blast_html4?Db=/seq_db/static/ind_MOUSE.Tryp.TMT.REVUniprot20150423.CONTAM.fasta.hdr&Pep=SSSPEPVTHLK&MassType=0	https://kronos.stanford.edu/gfy/www/modules/show_out/show_out_wrapper.php?run_id=&search_id=&scans_id=&peptide_id=&scanf=&charge=	https://kronos.stanford.edu/gfy/www/modules/show_out/show_out_wrapper.php?run_id=16836&search_id=21638&scans_id=16834&peptide_id=582&scanf=10231&charge=3	http://kronos.stanford.edu/gfy/www/modules/sdig/index.php?run_id=16836&search_id=21638&scans_id=16834&peptide_id=582&scanf=10231	http:/kronos.stanford.edu/gfy/www/modules/ascore/visual/trim-phos.php?run_id=16836&search_id=21638&scans_id=16834&peptide_id=582&charge=3	2.37838e+06	0.992916	0.0963615	0.363023	0.117787	0.122087	3.08202
RNA exonuclease 1 homolog OS=Mus musculus GN=Rexo1 PE=2 SV=1	sp|Q7TT28|REXO1_MOUSE	452	T	GGSGRPSST|79.97|GPQDSGPGPHAPLAWK	1	SGRPSST*GPQDSG	1	0	3.055	0.0043	0.3573	47.99	NO OTHERS:1	NONE > ascore = 13	1	0	0	0	GGSGRPSSTGPQDSGPGPHAPLAWK	ind_MOUSE.Tryp.TMT.REVUniprot20150423.CONTAM.fasta.hdr	21634	16839	3898	3	16841	21634	3898	16839	11974	3	16841	0.99	21634	3898	16839	11974	3	https://kronos.stanford.edu/cgi-bin/blast_html4?Db=/seq_db/static/ind_MOUSE.Tryp.TMT.REVUniprot20150423.CONTAM.fasta.hdr&Pep=GGSGRPSSTGPQDSGPGPHAPLAWK&MassType=0	https://kronos.stanford.edu/gfy/www/modules/show_out/show_out_wrapper.php?run_id=&search_id=&scans_id=&peptide_id=&scanf=&charge=	https://kronos.stanford.edu/gfy/www/modules/show_out/show_out_wrapper.php?run_id=16841&search_id=21634&scans_id=16839&peptide_id=3898&scanf=11974&charge=3	http://kronos.stanford.edu/gfy/www/modules/sdig/index.php?run_id=16841&search_id=21634&scans_id=16839&peptide_id=3898&scanf=11974	http:/kronos.stanford.edu/gfy/www/modules/ascore/visual/trim-phos.php?run_id=16841&search_id=21634&scans_id=16839&peptide_id=3898&charge=3	508980	0.92527	0.0986556	0.325655	0.105915	0.186079	3.07468
CAD protein OS=Mus musculus GN=Cad PE=2 SV=1	sp|B2RQC6|PYR1_MOUSE	1038	S	VLGTS|79.97|PEAIDSAENR	1	CRVLGTS*PEAIDS	2	12.2	2.9146	0.0841	0.3406	52.38	NO OTHERS:2	NONE > ascore = 13	2	0	0	3	VLGTSPEAIDSAENR	ind_MOUSE.Tryp.TMT.REVUniprot20150423.CONTAM.fasta.hdr	21638	16834	19224	3		21638	19224	16834	20841	3		0.99	21639	26122	16833	23513	2	https://kronos.stanford.edu/cgi-bin/blast_html4?Db=/seq_db/static/ind_MOUSE.Tryp.TMT.REVUniprot20150423.CONTAM.fasta.hdr&Pep=VLGTSPEAIDSAENR&MassType=0	https://kronos.stanford.edu/gfy/www/modules/show_out/show_out_wrapper.php?run_id=&search_id=&scans_id=&peptide_id=&scanf=&charge=	https://kronos.stanford.edu/gfy/www/modules/show_out/show_out_wrapper.php?run_id=&search_id=21638&scans_id=16834&peptide_id=19224&scanf=20841&charge=3	http://kronos.stanford.edu/gfy/www/modules/sdig/index.php?run_id=&search_id=21638&scans_id=16834&peptide_id=19224&scanf=20841	http:/kronos.stanford.edu/gfy/www/modules/ascore/visual/trim-phos.php?run_id=&search_id=21638&scans_id=16834&peptide_id=19224&charge=3	2.00268e+06	0.874723	0.0792421	0.319341	0.103873	0.0977228	3.07434
182 kDa tankyrase-1-binding protein OS=Mus musculus GN=Tnks1bp1 PE=1 SV=2	sp|P58871|TB182_MOUSE	300	S	LANISVPASES|79.97|PR	1	SVPASES*PRLSSR	5	33.7	2.6603	0.0946	0.4535	55.51	NO OTHERS:5	LANISVPASES|79.97|PR	5	0	0	0	LANISVPASESPR	ind_MOUSE.Tryp.TMT.REVUniprot20150423.CONTAM.fasta.hdr	21637	16835	19548	2		21636	16450	16836	19457	2		0.99	21637	19548	16835	22231	2	https://kronos.stanford.edu/cgi-bin/blast_html4?Db=/seq_db/static/ind_MOUSE.Tryp.TMT.REVUniprot20150423.CONTAM.fasta.hdr&Pep=LANISVPASESPR&MassType=0	https://kronos.stanford.edu/gfy/www/modules/show_out/show_out_wrapper.php?run_id=&search_id=&scans_id=&peptide_id=&scanf=&charge=	https://kronos.stanford.edu/gfy/www/modules/show_out/show_out_wrapper.php?run_id=&search_id=21636&scans_id=16836&peptide_id=16450&scanf=19457&charge=2	http://kronos.stanford.edu/gfy/www/modules/sdig/index.php?run_id=&search_id=21636&scans_id=16836&peptide_id=16450&scanf=19457	http:/kronos.stanford.edu/gfy/www/modules/ascore/visual/trim-phos.php?run_id=&search_id=21637&scans_id=16835&peptide_id=19548&charge=2	6.81874e+06	0.945496	0.159033	0.317794	0.10343	0.115138	3.07255
Serine/threonine-protein kinase PAK 4 OS=Mus musculus GN=Samd4b PE=4 SV=1	tr|G5E8A7|G5E8A7_MOUSE	585	S	MGLLS|79.97|PSGIGGVS|79.97|PR	1	GRMGLLS*PSGIGG	2	30.7	1.7344	0.1633	0.4115	59.04	NO OTHERS:1; 593:1	MGLLS|79.97|PSGIGGVSPR, MGLLS|79.97|PSGIGGVS|79.97|PR	1	1	0	1	MGLLSPSGIGGVSPR	ind_MOUSE.Tryp.TMT.REVUniprot20150423.CONTAM.fasta.hdr	21637	16835	47193	2	16837	21637	47193	16835	35782	2	16837	0.99	21634	21803	16839	21826	2	https://kronos.stanford.edu/cgi-bin/blast_html4?Db=/seq_db/static/ind_MOUSE.Tryp.TMT.REVUniprot20150423.CONTAM.fasta.hdr&Pep=MGLLSPSGIGGVSPR&MassType=0	https://kronos.stanford.edu/gfy/www/modules/show_out/show_out_wrapper.php?run_id=&search_id=&scans_id=&peptide_id=&scanf=&charge=	https://kronos.stanford.edu/gfy/www/modules/show_out/show_out_wrapper.php?run_id=16837&search_id=21637&scans_id=16835&peptide_id=47193&scanf=35782&charge=2	http://kronos.stanford.edu/gfy/www/modules/sdig/index.php?run_id=16837&search_id=21637&scans_id=16835&peptide_id=47193&scanf=35782	http:/kronos.stanford.edu/gfy/www/modules/ascore/visual/trim-phos.php?run_id=16837&search_id=21637&scans_id=16835&peptide_id=47193&charge=2	422830	0.982474	0.0937888	0.335511	0.109256	0.111227	3.07087
Serine/threonine-protein kinase PAK 4 OS=Mus musculus GN=Samd4b PE=4 SV=1	tr|G5E8A7|G5E8A7_MOUSE	593	S	MGLLS|79.97|PSGIGGVS|79.97|PR	2	SGIGGVS*PRHALT	1		1.7344	0.1633	0.4115	21.15	24 days, 9:01:00	NONE > ascore = 13	0	1	0	1	MGLLSPSGIGGVSPR	ind_MOUSE.Tryp.TMT.REVUniprot20150423.CONTAM.fasta.hdr	21637	16835	47193	2	16837	21637	47193	16835	35782	2	16837	0.99	21637	47193	16835	35782	2	https://kronos.stanford.edu/cgi-bin/blast_html4?Db=/seq_db/static/ind_MOUSE.Tryp.TMT.REVUniprot20150423.CONTAM.fasta.hdr&Pep=MGLLSPSGIGGVSPR&MassType=0	https://kronos.stanford.edu/gfy/www/modules/show_out/show_out_wrapper.php?run_id=&search_id=&scans_id=&peptide_id=&scanf=&charge=	https://kronos.stanford.edu/gfy/www/modules/show_out/show_out_wrapper.php?run_id=16837&search_id=21637&scans_id=16835&peptide_id=47193&scanf=35782&charge=2	http://kronos.stanford.edu/gfy/www/modules/sdig/index.php?run_id=16837&search_id=21637&scans_id=16835&peptide_id=47193&scanf=35782	http:/kronos.stanford.edu/gfy/www/modules/ascore/visual/trim-phos.php?run_id=16837&search_id=21637&scans_id=16835&peptide_id=47193&charge=2	422830	0.982474	0.0937888	0.335511	0.109256	0.111227	3.07087
Specifically androgen-regulated gene protein OS=Mus musculus GN=Sarg PE=2 SV=2	sp|Q8BI29|SARG_MOUSE	397	S	APARPAS|79.97|PALVSGTASAAGK	1	APARPAS*PALVSG	1	42.64	3.2819	0.2081	0.4068	65.66	NO OTHERS:1	APARPAS|79.97|PALVSGTASAAGK	1	0	0	1	APARPASPALVSGTASAAGK	ind_MOUSE.Tryp.TMT.REVUniprot20150423.CONTAM.fasta.hdr	21634	16839	1950	3	16841	21634	1950	16839	10956	3	16841	0.99	21634	1950	16839	10956	3	https://kronos.stanford.edu/cgi-bin/blast_html4?Db=/seq_db/static/ind_MOUSE.Tryp.TMT.REVUniprot20150423.CONTAM.fasta.hdr&Pep=APARPASPALVSGTASAAGK&MassType=0	https://kronos.stanford.edu/gfy/www/modules/show_out/show_out_wrapper.php?run_id=&search_id=&scans_id=&peptide_id=&scanf=&charge=	https://kronos.stanford.edu/gfy/www/modules/show_out/show_out_wrapper.php?run_id=16841&search_id=21634&scans_id=16839&peptide_id=1950&scanf=10956&charge=3	http://kronos.stanford.edu/gfy/www/modules/sdig/index.php?run_id=16841&search_id=21634&scans_id=16839&peptide_id=1950&scanf=10956	http:/kronos.stanford.edu/gfy/www/modules/ascore/visual/trim-phos.php?run_id=16841&search_id=21634&scans_id=16839&peptide_id=1950&charge=3	1.81304e+06	0.84276	0.0878816	0.299614	0.0981785	0.114162	3.05172
Drebrin (Fragment) OS=Mus musculus GN=Dbn1 PE=1 SV=1	tr|F7CPL2|F7CPL2_MOUSE	79	S	LSS|79.97|PVLHR	1	GLARLSS*PVLHRL	1	13.24	1.4809	0.2068	0.3122	20.11	NO OTHERS:1	LSS|79.97|PVLHR	1	0	0	3	LSSPVLHR	ind_MOUSE.Tryp.TMT.REVUniprot20150423.CONTAM.fasta.hdr	21636	16836	79042	2	16838	21636	79042	16836	8977	2	16838	0.99	21636	79042	16836	8977	2	https://kronos.stanford.edu/cgi-bin/blast_html4?Db=/seq_db/static/ind_MOUSE.Tryp.TMT.REVUniprot20150423.CONTAM.fasta.hdr&Pep=LSSPVLHR&MassType=0	https://kronos.stanford.edu/gfy/www/modules/show_out/show_out_wrapper.php?run_id=&search_id=&scans_id=&peptide_id=&scanf=&charge=	https://kronos.stanford.edu/gfy/www/modules/show_out/show_out_wrapper.php?run_id=16838&search_id=21636&scans_id=16836&peptide_id=79042&scanf=8977&charge=2	http://kronos.stanford.edu/gfy/www/modules/sdig/index.php?run_id=16838&search_id=21636&scans_id=16836&peptide_id=79042&scanf=8977	http:/kronos.stanford.edu/gfy/www/modules/ascore/visual/trim-phos.php?run_id=16838&search_id=21636&scans_id=16836&peptide_id=79042&charge=2	7.51157e+06	0.807711	0.1587	0.250821	0.0822378	0.115765	3.04996
Cleavage and polyadenylation-specificity factor subunit 6 OS=Mus musculus GN=Cpsf6 PE=4 SV=1	tr|H3BJ30|H3BJ30_MOUSE	407	T	EMDTART|79.97|PLSEAEFEEIMNR	1	EMDTART*PLSEAE	2	25.88	3.1499	0.0527	0.3997	72.44	NO OTHERS:2	EMDTART|79.97|PLSEAEFEEIMNR	2	0	0	3	EMDTARTPLSEAEFEEIMNR	ind_MOUSE.Tryp.TMT.REVUniprot20150423.CONTAM.fasta.hdr	21639	16833	43941	3	16835	21639	43941	16833	33116	3	16835	0.99	21638	39183	16834	33116	3	https://kronos.stanford.edu/cgi-bin/blast_html4?Db=/seq_db/static/ind_MOUSE.Tryp.TMT.REVUniprot20150423.CONTAM.fasta.hdr&Pep=EMDTARTPLSEAEFEEIMNR&MassType=0	https://kronos.stanford.edu/gfy/www/modules/show_out/show_out_wrapper.php?run_id=&search_id=&scans_id=&peptide_id=&scanf=&charge=	https://kronos.stanford.edu/gfy/www/modules/show_out/show_out_wrapper.php?run_id=16835&search_id=21639&scans_id=16833&peptide_id=43941&scanf=33116&charge=3	http://kronos.stanford.edu/gfy/www/modules/sdig/index.php?run_id=16835&search_id=21639&scans_id=16833&peptide_id=43941&scanf=33116	http:/kronos.stanford.edu/gfy/www/modules/ascore/visual/trim-phos.php?run_id=16835&search_id=21639&scans_id=16833&peptide_id=43941&charge=3	1.01747e+06	0.981593	0.0866661	0.359211	0.117896	0.142873	3.04685
Zyxin OS=Mus musculus GN=Zyx PE=1 SV=2	sp|Q62523|ZYX_MOUSE	300	S	MVPPDAPSSVSTGS|79.97|PQPPSFTYAQQK	1	SSVSTGS*PQPPSF	11	15.03	4.9266	0.0015	0.4773	88.46	NO OTHERS:11	MVPPDAPSSVSTGS|79.97|PQPPSFTYAQQK	11	0	0	0	MVPPDAPSSVSTGSPQPPSFTYAQQK	ind_MOUSE.Tryp.TMT.REVUniprot20150423.CONTAM.fasta.hdr	21634	16839	25728	3		21636	28844	16836	26239	4		0.99	21634	19102	16839	22449	3	https://kronos.stanford.edu/cgi-bin/blast_html4?Db=/seq_db/static/ind_MOUSE.Tryp.TMT.REVUniprot20150423.CONTAM.fasta.hdr&Pep=MVPPDAPSSVSTGSPQPPSFTYAQQK&MassType=0	https://kronos.stanford.edu/gfy/www/modules/show_out/show_out_wrapper.php?run_id=&search_id=&scans_id=&peptide_id=&scanf=&charge=	https://kronos.stanford.edu/gfy/www/modules/show_out/show_out_wrapper.php?run_id=&search_id=21636&scans_id=16836&peptide_id=28844&scanf=26239&charge=4	http://kronos.stanford.edu/gfy/www/modules/sdig/index.php?run_id=&search_id=21636&scans_id=16836&peptide_id=28844&scanf=26239	http:/kronos.stanford.edu/gfy/www/modules/ascore/visual/trim-phos.php?run_id=&search_id=21634&scans_id=16839&peptide_id=25728&charge=3	6.48409e+06	0.98545	0.113603	0.363636	0.119517	0.116099	3.04254
Peptidyl-prolyl cis-trans isomerase OS=Mus musculus GN=Fkbp4 PE=4 SV=1	tr|D6RDE2|D6RDE2_MOUSE	15	S	AAENGAQS|79.97|APLPLEGVDISPK	1	AENGAQS*APLPLE	2	38.05	2.9026	0.341	0.406	57.87	NO OTHERS:2	AAENGAQS|79.97|APLPLEGVDISPK	2	0	0	1	AAENGAQSAPLPLEGVDISPK	ind_MOUSE.Tryp.TMT.REVUniprot20150423.CONTAM.fasta.hdr	21638	16834	41631	3	16836	21638	41631	16834	32783	3	16836	0.99	21638	41631	16834	32783	3	https://kronos.stanford.edu/cgi-bin/blast_html4?Db=/seq_db/static/ind_MOUSE.Tryp.TMT.REVUniprot20150423.CONTAM.fasta.hdr&Pep=AAENGAQSAPLPLEGVDISPK&MassType=0	https://kronos.stanford.edu/gfy/www/modules/show_out/show_out_wrapper.php?run_id=&search_id=&scans_id=&peptide_id=&scanf=&charge=	https://kronos.stanford.edu/gfy/www/modules/show_out/show_out_wrapper.php?run_id=16836&search_id=21638&scans_id=16834&peptide_id=41631&scanf=32783&charge=3	http://kronos.stanford.edu/gfy/www/modules/sdig/index.php?run_id=16836&search_id=21638&scans_id=16834&peptide_id=41631&scanf=32783	http:/kronos.stanford.edu/gfy/www/modules/ascore/visual/trim-phos.php?run_id=16836&search_id=21638&scans_id=16834&peptide_id=41631&charge=3	543505	0.974819	0.115647	0.345896	0.113689	0.142085	3.04247
Brefeldin A-inhibited guanine nucleotide-exchange protein 2 OS=Mus musculus GN=Arfgef2 PE=1 SV=1	sp|A2A5R2|BIG2_MOUSE	218	S	ELEKPMQSKPQS|79.97|PVIQAT|79.97|AGSPK	1	MQSKPQS*PVIQAT	2	11.27	2.7734	0.052	0.1917	30.48	9 days, 8:02:00	NONE > ascore = 13	0	2	0	1	ELEKPMQSKPQSPVIQATAGSPK	ind_MOUSE.Tryp.TMT.REVUniprot20150423.CONTAM.fasta.hdr	21634	16839	10667	3		21634	10667	16839	15852	3		0.99	21634	10667	16839	17549	3	https://kronos.stanford.edu/cgi-bin/blast_html4?Db=/seq_db/static/ind_MOUSE.Tryp.TMT.REVUniprot20150423.CONTAM.fasta.hdr&Pep=ELEKPMQSKPQSPVIQATAGSPK&MassType=0	https://kronos.stanford.edu/gfy/www/modules/show_out/show_out_wrapper.php?run_id=&search_id=&scans_id=&peptide_id=&scanf=&charge=	https://kronos.stanford.edu/gfy/www/modules/show_out/show_out_wrapper.php?run_id=&search_id=21634&scans_id=16839&peptide_id=10667&scanf=15852&charge=3	http://kronos.stanford.edu/gfy/www/modules/sdig/index.php?run_id=&search_id=21634&scans_id=16839&peptide_id=10667&scanf=15852	http:/kronos.stanford.edu/gfy/www/modules/ascore/visual/trim-phos.php?run_id=&search_id=21634&scans_id=16839&peptide_id=10667&charge=3	1.63745e+06	0.996999	0.116057	0.341444	0.112372	0.122957	3.03852
[truncated: 6,603 more rows]
[truncated: 7 more columns]

## Sheet: > 2-fold hits
annotation	ref	site	res	peptide	site_on_peptide	motif_pep	spectral_count	ascore	xcorr	dcn	dcn2	pep_score	co-occurring_sites	peptide_forms	monoModCount	bisModCount	trisModCount	red	pep_no_mods	seq_db	ascore_search_id	ascore_scans_id	ascore_peptide_id	ascore_charge	ascore_run_id	sequest_search_id	sequest_peptide_id	sequest_scans_id	sequest_scanf	sequest_charge	sequest_run_id	precision	pep_score_search_id	pep_score_peptide_id	pep_score_scans_id	pep_score_scanf	pep_score_charge	red_url	mascot_url	sequest_url	msms_url	ascore_url	TMTSum	Correl	Frac126 - untransduced	Frac127 - Hipk4	Frac128 - K40S	Frac129 - Y175F	127:128
[truncated: 909 more rows]
[truncated: 3 more columns]

## Sheet: Actin hits - GC expression
	Gene	Germ cell clusters:	GC1	GC2	GC3	GC4	GC5	GC6	GC7	GC8	GC9	GC10	GC11	GC12
[truncated: 36 more rows]
